# Supplementary material for: Transcriptome architecture and regulation at environmental transitions in flavobacteria: the case of an important fish pathogen
Source: ISME Commun. 2021 Jul 7;1:33. doi: 10.1038/s43705-021-00029-9 (PMC9723704; doi:10.1038/s43705-021-00029-9)
Supplement: Supplementary file 2 — Table S1 [file 43705_2021_29_MOESM2_ESM.xlsx]

## Sheet: 64 RNA samples_microarrays
Array_id	SampleName	Order.table	Description of the biological condition	Condition when cells were collected	Replicate
257113710002_201510141136_S01_GE1_107_Sep09_1_1.txt	T1_a	1	Expression during the growth cycle. Cells were grown in Tryptone Yeast Extract Salts (TYES) broth at 18°C with vigorous shaking (200 rpm and 5:1 flask-to-volume ratio). Five samples were harvested in the course of growth: Starting cultures were diluted 500 times in fresh TYES and cells were harvested at OD600nm of 0.4 ([T1], exponential phase), 1 and 1.2 ([T2] and [T3], transition phase), 1.3 and…	OD600 approx. 0.4	a
257113710006_201510291049_S01_GE1_107_Sep09_1_1.txt	T1_c	2		OD600 approx. 0.4	c
257113710005_201510291026_S01_GE1_107_Sep09_1_1.txt	T2_a	3		OD600 approx. 1	a
257113710006_201510291049_S01_GE1_107_Sep09_1_2.txt	T2_c	4		OD600 approx. 1	c
257113710006_201510291049_S01_GE1_107_Sep09_1_3.txt	T3_a	5		OD600 approx. 1.2	a
257113710004_201510161105_S01_GE1_107_Sep09_1_1.txt	T3_c	6		OD600 approx. 1.2	c
257113710001_201510071112_S01_GE1_107_Sep09_1_1.txt	T4_a	7		OD600 approx. 1.3	a
257113710003_201510141159_S01_GE1_107_Sep09_1_1.txt	T4_c	8		OD600 approx. 1.3	c
257113710003_201510141159_S01_GE1_107_Sep09_1_2.txt	T5_a	9		OD600 approx. 1.7	a
257113710004_201510161105_S01_GE1_107_Sep09_1_2.txt	T5_c	10		OD600 approx. 1.7	c
257113710003_201510141159_S01_GE1_107_Sep09_1_3.txt	T2-FCS_a	11	Expression in cells grown in TYES broth supplemented with 5% fœtal calf serum. Starting cultures performed in TYES were diluted 500 times in fresh TYES 5% FCS and cultures incubated at 18°C with vigorous shaking (200 rpm and 5:1 flask-to-volume ratio). Cells were harvested at OD600nm of 1 [T2-FCS].	OD600 approx. 1	a
257113710005_201510291026_S01_GE1_107_Sep09_1_2.txt	T2-FCS_b	12		OD600 approx. 1	b
257113710004_201510161105_S01_GE1_107_Sep09_1_3.txt	TYESA-FCS_a	13	Expression in colonies on TYES agar. Starting cultures were performed in TYES at 18°C 200 rpm. These cultures were then diluted in 1% peptone water at final concentration of 1E4 cfu/mL and cells plated onto TYES plates containing various nutrient concentrations. After incubation for 4 days at 18°C, cells were harvested from plates containing individual colonies. TYES-based agar (TYESA) plates con…	Colonies on TYES 5% FCS	a
257113710002_201510141136_S01_GE1_107_Sep09_1_2.txt	TYESA-FCS_b	14		Colonies on TYES 5% FCS	b
257113710005_201510291026_S01_GE1_107_Sep09_1_3.txt	TYESA_a	15		Colonies on TYES	a
257113710002_201510141136_S01_GE1_107_Sep09_1_3.txt	TYESA_b	16		Colonies on TYES	b
257113710005_201510291026_S01_GE1_107_Sep09_1_4.txt	TYESA-0.5_a	17		Colonies on TYES 50% nutrient concentration	a
257113710004_201510161105_S01_GE1_107_Sep09_1_4.txt	TYESA-0.5_b	18		Colonies on TYES 50% nutrient concentration	b
257113710004_201510161105_S01_GE1_107_Sep09_2_1.txt	TYESA-0.2_a	19		Colonies on TYES 20% nutrient concentration	a
257113710006_201510291049_S01_GE1_107_Sep09_1_4.txt	TYESA-0.2_b	20		Colonies on TYES 20% nutrient concentration	b
257113710005_201510291026_S01_GE1_107_Sep09_2_1.txt	CS3_a	21	Adaptation to various growth conditions. Starting cultures performed in TYES broth were diluted 500 times in a same batch of TYES broth and incubated with vigorous shaking (200 rpm and 5:1 flask-to-volume ratio) under various conditions. For cold temperature adaptation, cultures were incubated at 18°C [CS3], 4°C [Temp4C] or 10°C [Temp10C]. To test growth at high osmolarity, the salinity of the me…	Control, OD600 approx. 0.4	a
257113710002_201510141136_S01_GE1_107_Sep09_1_4.txt	CS3_c	22		Control, OD600 approx. 0.4	c
257113710006_201510291049_S01_GE1_107_Sep09_2_1.txt	Temp10C_a	23		Growth at 10°C, OD600 approx. 0.4	a
257113710001_201510071112_S01_GE1_107_Sep09_1_2.txt	Temp10C_c	24		Growth at 10°C, OD600 approx. 0.4	c
257113710002_201510141136_S01_GE1_107_Sep09_2_1.txt	Temp4C_a	25		Growth at 4°C, OD600 approx. 0.4	a
257113710003_201510141159_S01_GE1_107_Sep09_1_4.txt	Temp4C_c	26		Growth at 4°C, OD600 approx. 0.4	c
257113710005_201510291026_S01_GE1_107_Sep09_2_2.txt	DIP_a	27		Iron depletion, OD600 approx. 0.4	a
257113710006_201510291049_S01_GE1_107_Sep09_2_2.txt	DIP_c	28		Iron depletion, OD600 approx. 0.4	c
257113710001_201510071112_S01_GE1_107_Sep09_1_3.txt	NaCl_a	29		High salinity, OD600 approx. 0.4	a
257113710002_201510141136_S01_GE1_107_Sep09_2_2.txt	NaCl_c	30		High salinity, OD600 approx. 0.4	c
257113710001_201510071112_S01_GE1_107_Sep09_1_4.txt	CS1_a	31	Adaptation to stress conditions. Starting cultures were diluted 500 times in TYES broth and incubated with vigorous shaking (200 rpm and 5:1 flask-to-volume ratio) at 18°C until OD600nm of 0.8. Cultures were then split in three parts and hydrogen peroxide [HP] or lysozyme [LYSO] was added to one of them at a final concentration of 100 µM or 100 µg/mL, respectively. The third part was used as an u…	Control, OD600 approx. 0.8	a
257113710003_201510141159_S01_GE1_107_Sep09_2_1.txt	CS1_b	32		Control, OD600 approx. 0.8	b
257113710001_201510071112_S01_GE1_107_Sep09_2_1.txt	HP_a	33		Hydrogen peroxide stress, OD600 approx. 0.8	a
257113710005_201510291026_S01_GE1_107_Sep09_2_3.txt	HP_b	34		Hydrogen peroxide stress, OD600 approx. 0.8	b
257113710006_201510291049_S01_GE1_107_Sep09_2_3.txt	LYSO_a	35		Lysozyme exposure, OD600 approx. 0.8	a
257113710003_201510141159_S01_GE1_107_Sep09_2_2.txt	LYSO_b	36		Lysozyme exposure, OD600 approx. 0.8	b
257113710001_201510071112_S01_GE1_107_Sep09_2_2.txt	CS2_a	37	Adaptation to stress conditions. Starting cultures were diluted 500 times in TYES broth and incubated with vigorous shaking (200 rpm and 5:1 flask-to-volume ratio) at 18°C until OD600nm of 0.4. Cultures were then split in three parts. Control cultures were maintained in the same growth conditions [CS2]. For amoxicillin exposure, cultures were supplemented with amoxicillin at a final concentration…	Control, OD600 approx. 0.5	a
257113710004_201510161105_S01_GE1_107_Sep09_2_2.txt	CS2_b	38		Control, OD600 approx. 0.5	b
257113710001_201510071112_S01_GE1_107_Sep09_2_3.txt	AMOX_a	39		Amoxicillin exposure, OD600 approx. 0.5	a
257113710003_201510141159_S01_GE1_107_Sep09_2_3.txt	AMOX_b	40		Amoxicillin exposure, OD600 approx. 0.5	b
257113710001_201510071112_S01_GE1_107_Sep09_2_4.txt	Anaer_a	41		Oxygen limitation, OD600 approx. 0.5	a
257113710002_201510141136_S01_GE1_107_Sep09_2_3.txt	Anaer_b	42		Oxygen limitation, OD600 approx. 0.5	b
257113710004_201510161105_S01_GE1_107_Sep09_2_3.txt	LAB_a	43	Expression of cells in water. Starting cultures were diluted 500 times in TYES broth and incubated with vigorous shaking (200 rpm and 5:1 flask-to-volume ratio) until OD600nm of 1. Cultures were then diluted 100-times in 15 L dechlorinated water maintained at 10°C with vigorous aeration in aquarium containing 10 juveniles rainbow trout [FishWater] or no fish [Water]. Bacteria were harvested after…	Control, vacuum filtration	a
257113710002_201510141136_S01_GE1_107_Sep09_2_4.txt	LAB_c	44		Control, vacuum filtration	c
257113710004_201510161105_S01_GE1_107_Sep09_2_4.txt	Water_a	45		24h of incubation in water	a
257113710003_201510141159_S01_GE1_107_Sep09_2_4.txt	Water_c	46		24h of incubation in water	c
257113710005_201510291026_S01_GE1_107_Sep09_2_4.txt	FishWater_a	47		24h of incubation in water with fish	a
257113710006_201510291049_S01_GE1_107_Sep09_2_4.txt	FishWater_c	48		24h of incubation in water with fish	c
257113710007_201702231147_S01_GE1_107_Sep09_1_1.txt	CS4_a	49	Exposure to acid stress. Starting cultures were diluted 500 times in TYES broth and incubated with vigorous shaking (200 rpm and 5:1 flask-to-volume ratio) at 18°C until OD600nm of 0.5. Cultures were then split in two halves and HCl 0.1N solution was diluted 133x in one of them [HCl] or not [CS4]. Cells were harvested from the cultures after 5 min of incubation.	Control, OD600 approx. 0.5	a
257113710008_201702231211_S01_GE1_107_Sep09_2_3.txt	CS4_b	50		Control, OD600 approx. 0.5	b
257113710007_201702231147_S01_GE1_107_Sep09_2_2.txt	HCl_a	51		Acid stress, OD600 approx. 0.5	a
257113710008_201702231211_S01_GE1_107_Sep09_1_4.txt	HCl_b	52		Acid stress, OD600 approx. 0.5	b
257113710007_201702231147_S01_GE1_107_Sep09_2_1.txt	EP_a	53	Exposure to skin mucus of rainbow trout. Starting cultures were diluted 500 times in TYES broth and incubated with vigorous shaking (200 rpm and 5:1 flask-to-volume ratio) at 18°C until OD600nm of 1. Cultures (8 mL) were harvested by centrifugation 3 min at 4000g, washed in sterile 1% peptone water, then resuspended in 400 µL of the same buffer. This bacterial suspension was split in two halves t…	Control, 1% peptone water	a
257113710008_201702231211_S01_GE1_107_Sep09_1_3.txt	EP_b	54		Control, 1% peptone water	b
257113710007_201702231147_S01_GE1_107_Sep09_1_2.txt	MUC_a	55		Fish skin mucus exposure	a
257113710008_201702231211_S01_GE1_107_Sep09_2_4.txt	MUC_b	56		Fish skin mucus exposure	b
257113710007_201702231147_S01_GE1_107_Sep09_1_3.txt	EP2_a	57	Exposure to plasma of rainbow trout. Starting cultures were diluted 500 times in TYES broth and incubated with vigorous shaking (200 rpm and 5:1 flask-to-volume ratio) at 18°C until OD600nm of 1. Cultures (8 mL) were harvested by centrifugation 3 min at 4000g, washed twice in sterile 1% peptone water and split in two halves. One of the pellets was resuspended in 300 µL of plasma [Plasma] and the …	Control, 1% peptone water	a
257113710008_201702231211_S01_GE1_107_Sep09_1_1.txt	EP2_b	58		Control, 1% peptone water	b
257113710007_201702231147_S01_GE1_107_Sep09_1_4.txt	Plasma_a	59		Fish plasma exposure	a
257113710008_201702231211_S01_GE1_107_Sep09_2_1.txt	Plasma_b	60		Fish plasma exposure	b
257113710007_201702231147_S01_GE1_107_Sep09_2_4.txt	TYESA-Blood_a	61	Colonies grown in the presence of blood. Starting cultures were diluted 500 times in TYES broth and incubated with vigorous shaking (200 rpm and 5:1 flask-to-volume ratio) at 18°C until OD600nm of 2. Twenty µL of culture were then striked on TYES agar plates with an overlay of 10% defibrinated horse blood-agar [TYESA-Blood] or on plates made with 10% defibrinated horse blood solidified with 1.5% …	Colonies on TYES supplemented with blood	a
257113710008_201702231211_S01_GE1_107_Sep09_1_2.txt	TYESA-Blood_b	62		Colonies on TYES supplemented with blood	b
257113710007_201702231147_S01_GE1_107_Sep09_2_3.txt	Blood_a	63		Colonies on blood-agar	a
257113710008_201702231211_S01_GE1_107_Sep09_2_2.txt	Blood_b	64		Colonies on blood-agar	b

## Sheet: 18-condition RNA pool
Sample	Description of the biological condition	Condition when cells were collected
1	Expression during the growth cycle. Cells were grown in TYES broth supplemented with 5% foetal calf serum (FCS) at 18°C with vigorous shaking (200 rpm and 5:1 flask-to-volume ratio). Seven samples were harvested in the course of growth: pre-cultures were diluted 500 times in TYES 5% FCS and cells were harvested at OD600nm of 0.4 and 0.6 (exponential phase), 1 and 1.2 (transition phase), 1.3 and 1…	OD600 approx. 0.4
2		OD600 approx. 0.6
3		OD600 approx. 0.8
4		OD600 approx. 1
5		OD600 approx. 1.2
6		OD600 approx. 1.3
7		OD600 approx. 1.7
8	Adaptation to cold temperature. Cells were grown in TYES broth 5% FCS at 4°C and harvested in exponential phase.	OD600 approx. 0.4
9	Adaptation to cold temperature. Cells were grown in TYES broth 5% FCS at 12°C and harvested in exponential phase.	OD600 approx. 0.5
10	Peroxide stress. Cells were grown in TYES 5% FCS at 18°C until OD600nm of 0.8, then harvested after exposure during 20 min to 0.1 mM hydrogen peroxide.	OD600 approx. 0.8
11	Disulfide stress. Cells were grown in TYES 5% FCS at 18°C until OD600nm of 0.8, then exposed during 20 min to 0.1 mM diamine and harvested.	OD600 approx. 0.8
12	Oxygen limitation. Pre-cultures were diluted 500 times in TYES 5% FCS and incubated with vigorous shaking (200 rpm and 5:1 flask-to-volume ratio) at 18°C until OD600nm of 0.8. Culture was then transferred into a 15 mL Falcon tube fully filled and incubated during 1h under static condition then harvested.	OD600 approx. 0.8
13	Sub-lethal exposure to antibiotics. Cells were grown in TYES 5% FCS at 18°C with vigorous shaking until OD600nm of 0.4 then cultures were splitted and cells exposed during 1h to 0.4 µg/mL florfenicol or amoxicillin (this concentration leading to a decreased growth rate) and harvested.	OD600 approx. 0.8
14		OD600 approx. 0.8
15	High osmolarity. Pre-cultures grown in TYES 5% FCS at 18°C 200 rpm were diluted 500 times in TYES 5% FCS supplemented with 0.75% NaCl and incubated until OD600nm of 0.4 then harvested.	OD600 approx. 0.4
16	Iron depletion. Pre-cultures grown in TYES 5% FCS at 18°C 200 rpm were diluted 500 times in TYES 5% FCS supplemented with 25 µM 2,2-dipyridyl and incubated until OD600nm of 0.3 then harvested.	OD600 approx. 0.3
17	Growth in TYES broth without FCS supplementation. Cells were grown in TYES broth at 18°C 200 rpm and harvested at OD600 nm of 0.8.	OD600 approx. 0.8
18	Colonies on TYES-agar. Pre-cultures were performed in TYES at 18°C 200 rpm then diluted in 1% peptone water at final concentration of 1E4 cfu/mL and cells plated on TYES agar plates supplemented with 5% FCS. Colonies were harvested after 4 days of incubation at 18°C.	Colonies on TYES agar 5% FCS
