# Supplementary material for: Transcriptome architecture and regulation at environmental transitions in flavobacteria: the case of an important fish pathogen
Source: ISME Commun. 2021 Jul 7;1:33. doi: 10.1038/s43705-021-00029-9 (PMC9723704; doi:10.1038/s43705-021-00029-9)
Supplement: Supplementary file 3 — Table S2 [file 43705_2021_29_MOESM3_ESM.xlsx]

## Sheet: Legend
Table S2: List of TSSs and promoters of F. psychrophilum defined by 5'-end RNA-Seq and sigma-factor binding sites prediction.
Sheet	Description
5'-ends	List of 1868 putative TSSs identified by 5'-end RNA-Seq.
putative TSSs	List of 1194 putative TSSs with a predicted sigma factor binding site in the promoter sequence.
5'-ends not analyzed	List of 16 5'-ends detected within repeated regions and not analyzed for sigma factor binding sites discovery.
Column	Description
id	unique TSS identifier (THC0290_T_0001 to THC0290_T_1884)
strand	strand of the TSS on the THCO290 genome sequence (ENA accession number LT670843.1)
pos	position of the TSS on the THCO290 genome sequence LT670843.1
cover	number of reads starting at this position in the 5'-end RNA-Seq dataset
xcortree	Provides the coordinate of the leaf representing the corresponding TSS in the tree summarizing the pairwise correlations between promoter activities.
sigmamotif	The most likely bipartite motif cluster for the sequence.
probamotif	Confidence probability for the bipartite motif cluster reported in "sigmamotif" (posterior probability).
sigmafactor	The most likely sigma factor (SigA, Sig54, SigECF) according to the probability for the sequence of belonging to the different clusters. NA when no motif was identified or ND when the motif could not be linked to SigA or SigECF.
probasigma	Confidence probability for the Sigma factor reported in "sigmafactor" (posterior probability).
downstreamgenes.dist	Distance(s) between the TSS(s) and the start codon of downstream gene(s). Genes starting from 1 to 499 nts downstream of the TSS are listed.
downstreamgenes.ltag	Locustag(s) of the downstream gene(s) on the THCO290 genome sequence LT670843.1.
downstreamgenes.name	Gene name(s) of the downstream gene(s) on the THCO290 genome sequence LT670843.1.
downstreamgenes.annot	Annotation of the downstream gene(s) on the THCO290 genome sequence LT670843.1.
downstreamgenes.ltagv2	Locustag of the closest downstream gene on the MicroScope platform genome annotation (unpublished data) of the THCO2-90 genome sequence LT670843.1.
seq	The sequence (-50 bp,+10bp) of length 61bp with the position of the boxes of the sigma factor binding site highlighted in upper case.
Subsequent columns labeled by sample names	Estimated expression level measured downstream the TSS, the transformation used for quantile-normalization of the CDS has been applied. Symbols [+] [~] or [-] are used to indicate whether this level is above (log2 ratio ≥ 1), approximately equal , or below (log2 ratio ≤ -1) the level measured upstream of the TSS.

## Sheet: 5'-ends
id	strand	pos	cover	xcortree	sigmamotif	probamotif	sigmafactor	probasigma	downstreamgenes.dist	downstreamgenes.ltag	downstreamgenes.name	downstreamgenes.annot	downstreamgenes.ltagv2	seq	T1_a.Up	T1_a.Expression	T1_c.Up	T1_c.Expression	T2_a.Up	T2_a.Expression	T2_c.Up	T2_c.Expression	T3_a.Up	T3_a.Expression	T3_c.Up	T3_c.Expression	T4_a.Up	T4_a.Expression	T4_c.Up	T4_c.Expression	T5_a.Up	T5_a.Expression	T5_c.Up	T5_c.Expression	T2.FCS_a.Up	T2.FCS_a.Expression	T2.FCS_b.Up	T2.FCS_b.Expression	TYESA.FCS_a.Up	TYESA.FCS_a.Expression	TYESA.FCS_b.Up	TYESA.FCS_b.Expression	TYESA_a.Up	TYESA_a.Expression	TYESA_b.Up	TYESA_b.Expression	TYESA.0.5_a.Up	TYESA.0.5_a.Expression	TYESA.0.5_b.Up
THC0290_T_0001	1	537	10	677	SM3	0.43952	SigA	0.89037	17	THC0290_0001	rnr	Ribonuclease R	THC0290_v2_0001	aaaactgaaatctaaatTctgaaatctaataTCTTATTCGTAAATTTCAactttataaaaa	[+]	11.411	[+]	10.93	[+]	11.231	[+]	11.3	[+]	11.434	[+]	11.773	[+]	11.509	[+]	11.944	[+]	10.929	[+]	11.753	[+]	11.939	[+]	11.711	[+]	13.52	[+]	13.692	[+]	12.284	[+]	12.352	[+]	14.05	[+]
THC0290_T_0002	1	815	3	560	NA	0.898367	NA	1	NA	NA	NA	NA	NA	aatacttagtaaaaggaatttcacaagactattaCGAAGGAAAAATAGACATGACTTctcg	[~]	12.361	[~]	12.308	[~]	12.79	[~]	12.619	[~]	12.808	[~]	13.142	[~]	12.811	[~]	13.29	[~]	11.872	[~]	12.44	[~]	12.703	[~]	12.728	[~]	14.011	[~]	13.73	[~]	13.149	[~]	13.276	[-]	13.445	[~]
THC0290_T_0003	1	3491	4	1414	SM5	0.853715	ND	0.853715	26	THC0290_0003	NA	Probable transmembrane protein of unknown function	THC0290_v2_0003	aaaatactttcaaatagatttttaacaattattaaTTTTTAACTTGCAtgatcggaatatt	[~]	10.873	[~]	10.663	[~]	10.755	[~]	10.76	[~]	11.121	[~]	10.573	[~]	11	[~]	12.147	[~]	10.205	[~]	10.172	[~]	10.832	[~]	11.199	[-]	10.732	[-]	11.316	[-]	11.359	[-]	11.528	[-]	10.87	[-]
THC0290_T_0004	-1	4317	4377	996	SM1	0.902366	SigA	0.992336	0;74	THC0290_tRNA_0001;THC0290_N_0003	NA;NA	transfer RNA-Cys;new transcription segment	NA;NA	tcaattgctaaTTATTAATAGTTTCTTATATTTGCAatccgctaactaatggcgtcgtggc	[+]	6.614	[+]	6.709	[+]	6.812	[+]	6.948	[+]	7.295	[+]	8.706	[+]	8.077	[+]	11.661	[+]	10.215	[+]	10.859	[+]	7.25	[+]	6.905	[+]	11.031	[+]	10.252	[+]	9.39	[+]	8.693	[+]	11.097	[+]
THC0290_T_0005	-1	4329	339	997	SM1	0.957014	SigA	1	12;86	THC0290_tRNA_0001;THC0290_N_0003	NA;NA	transfer RNA-Cys;new transcription segment	NA;NA	AAATactaattatcaattgctaaTTATTAATAGTTTCTTATATTTGCAatccgctaactaa	[+]	6.777	[+]	6.934	[+]	7.129	[+]	7.039	[+]	7.395	[+]	8.765	[+]	8.204	[+]	11.679	[+]	10.388	[+]	11.018	[+]	7.426	[+]	7.008	[+]	11.116	[+]	10.411	[+]	9.457	[+]	8.833	[+]	11.367	[+]
THC0290_T_0006	-1	4757	5	1081	NA	0.844385	NA	0.998001	-24;336;440	THC0290_0004;THC0290_N_0005;THC0290_tRNA_0001	folB;NA;NA	Dihydroneopterin aldolase;new transcription segment;transfer RNA-Cys	THC0290_v2_0004;NA;NA	ctaaattttaaattttaaatataaaaatgggaatTATTAAACTAAAAAACATTCGTActtt	[+]	9.992	[+]	10.327	[+]	10.758	[+]	10.666	[+]	11.049	[+]	11.743	[+]	11.006	[+]	11.808	[+]	11.779	[+]	12.298	[+]	10.744	[+]	10.982	[+]	12.329	[+]	12.002	[+]	11.449	[+]	11.366	[+]	12.368	[+]
THC0290_T_0007	-1	4863	6	691	SM1	0.970343	SigA	0.999667	82;442	THC0290_0004;THC0290_N_0005	folB;NA	Dihydroneopterin aldolase;new transcription segment	THC0290_v2_0004;NA	AAATtgagtgatttttcttcggtTGACATAATTATGTTTAATTTTAGCaaagataaaaaaa	[~]	7.097	[~]	7.061	[~]	7.648	[~]	7.386	[~]	7.803	[~]	8.327	[~]	7.826	[~]	8.451	[~]	8.886	[~]	9.551	[~]	7.53	[~]	8.007	[~]	9.32	[~]	9.907	[~]	8.234	[~]	8.83	[~]	10.246	[~]
THC0290_T_0008	1	4869	26	25	SM1	0.92036	SigA	0.998667	16	THC0290_0005	glnS	Glutamine--tRNA ligase	THC0290_v2_0005	ATCTCaatcaactttaaacggaaacTTTAAAGCATTTTTTTATCTTTGCTaaaattaaaca	[+]	10.122	[+]	10.226	[+]	9.786	[+]	9.792	[+]	9.838	[+]	9.675	[+]	9.691	[+]	9.652	[+]	9.984	[+]	10.235	[+]	9.836	[+]	9.954	[+]	9.812	[+]	9.697	[+]	9.618	[+]	9.67	[+]	9.77	[+]
THC0290_T_0009	-1	5624	5	200	SM4	0.995002	Sig54	0.995002	-7	THC0290_N_0006	NA	new transcription segment	NA	tCAggcgagcaaactcatattggtTTGGTCTAACTTTTGTTGTAtcatatatttgatctaa	[~]	4.866	[~]	5.243	[+]	5.715	[+]	5.749	[+]	5.609	[~]	6.039	[+]	5.418	[~]	6.599	[+]	6.388	[~]	7.222	[+]	5.894	[+]	5.245	[+]	6.682	[~]	5.711	[~]	6.68	[+]	7.069	[~]	6.395	[+]
THC0290_T_0010	1	7268	114	1144	SM1	0.997334	SigA	0.999667	17;346	THC0290_0006;THC0290_0007	NA;NA	Hypothetical protein precursor;Probable transmembrane protein of unknown function	THC0290_v2_0006;NA	TTaacgactatttaacacaacaTGAAGATGAATTTTGTAACTTTATAattaataaataaaa	[+]	12.303	[+]	12.44	[+]	12.721	[+]	13.009	[+]	13.246	[+]	13.779	[+]	12.998	[+]	14.211	[+]	12.723	[+]	14.039	[+]	12.717	[+]	12.861	[+]	16.078	[+]	15.628	[+]	14.572	[+]	14.464	[+]	15.958	[+]
THC0290_T_0011	1	7637	8	1388	NA	0.740087	NA	0.998334	-23;331	THC0290_0007;THC0290_0008	NA;NA	Probable transmembrane protein of unknown function;Protein of unknown function	NA;NA	aaaacaaaacgctaaacttcaaaaataatggcaTTTGAAGATTTAAAAGAAAATGCAGaag	[~]	12.822	[~]	12.739	[~]	13.391	[~]	13.459	[~]	14.179	[~]	14.277	[~]	14.414	[~]	15.435	[~]	13.562	[~]	13.839	[~]	13.18	[~]	13.283	[~]	15.139	[~]	15.477	[~]	15.071	[~]	15.367	[~]	15.464	[~]
THC0290_T_0012	1	7884	6	1308	SM1	0.422859	SigA	0.76941	84;344	THC0290_0008;THC0290_N_0008	NA;NA	Protein of unknown function;new transcription segment	NA;NA	gttattcattgggatttttatgtattgcggGTATTTATTTACTTTTAGCcatacttttatt	[-]	12.591	[-]	12.548	[-]	13.001	[-]	13.189	[-]	13.949	[-]	13.547	[-]	13.992	[-]	15.212	[-]	13.975	[-]	13.71	[-]	12.877	[-]	13.141	[-]	14.418	[~]	15.315	[-]	14.891	[~]	15.312	[-]	14.763	[-]
THC0290_T_0013	-1	9250	26	973	SM6	0.955015	SigECF	0.955015	23	THC0290_0009	NA	Band 7 family protein	THC0290_v2_0009	aattaaactacaactttGTAACtttcgatacaaaCTAGCGTATAACCAATAtaacaaacta	[+]	11.317	[+]	11.476	[+]	11.817	[+]	11.766	[+]	12.084	[+]	12.29	[+]	12.131	[+]	12.282	[+]	12.881	[+]	12.83	[+]	11.521	[+]	11.8	[+]	12.367	[+]	12.162	[+]	12.259	[+]	12.322	[+]	13.266	[+]
THC0290_T_0014	-1	9784	3	493	NA	0.735422	NA	0.999667	396	THC0290_N_0009	NA	new transcription segment	NA	aagatagcactttggctgaattatttttgccaatACTAGCATCAAAAGGAATTGTAAcaaa	[~]	11.05	[~]	10.995	[~]	10.659	[~]	10.516	[~]	10.315	[~]	9.697	[~]	10.331	[~]	10.642	[~]	10.788	[~]	10.383	[~]	10.405	[~]	10.493	[~]	9.9	[~]	10.524	[~]	10.619	[~]	10.421	[~]	10.311	[~]
THC0290_T_0015	1	10629	3	201	SM4	0.989004	Sig54	0.989004	1	THC0290_N_0010	NA	new transcription segment	NA	atgCCCAgccagaatttatcaatagaTCGGCATATTGTTTGTACAAatgttttctttccga	[~]	4.385	[~]	4.484	[+]	5.465	[+]	5.359	[+]	5.312	[+]	6.197	[+]	6.087	[~]	8.461	[+]	6.388	[+]	7.465	[+]	5.215	[+]	5.167	[+]	7.167	[+]	5.722	[+]	6.766	[+]	6.634	[+]	5.825	[+]
THC0290_T_0016	-1	10908	8	1577	SM2	0.667777	SigA	0.997667	14	THC0290_0010	gltX	Glutamate--tRNA ligase	THC0290_v2_0010	actccgtgaaaacctttgtaaactttgtggtTAATCATTTATCTTTGTATCAAAATttaca	[+]	10.857	[+]	10.862	[+]	10.27	[+]	10.255	[+]	9.994	[+]	10.129	[+]	10.1	[+]	10.585	[+]	10.81	[+]	11.086	[+]	10.275	[+]	10.325	[+]	10.743	[+]	10.617	[+]	10.279	[+]	10.435	[~]	10.651	[+]
THC0290_T_0017	1	11169	3	1126	SM1	0.948351	SigA	0.979007	20	THC0290_0011	NA	Putative chromosome segregation ATPase	THC0290_v2_0011	TaatatatttttaactcattaGAATTTAAAAATTACTACTTTTATAggttataactaatga	[+]	8.961	[+]	8.747	[+]	9.139	[+]	9.016	[+]	9.107	[+]	9.612	[+]	9.203	[+]	9.656	[+]	9.775	[+]	10.851	[+]	8.82	[+]	9.31	[+]	12.696	[+]	12.036	[+]	11.46	[+]	11.073	[+]	12.102	[+]
THC0290_T_0018	1	14475	7	1633	SM1	0.753082	SigA	1	39;494	THC0290_0012;THC0290_N_0011	NA;NA	Endoribonuclease YbeY;new transcription segment	THC0290_v2_0012;NA	ATAtttaaatagtattgaaatttTAAATAGACAAACACTACCTTTGCGctcaaattttaac	[-]	9.293	[-]	9.333	[-]	9.12	[-]	9.277	[-]	9.027	[-]	9.009	[-]	9.163	[-]	8.611	[~]	9.518	[-]	9.537	[-]	9.273	[-]	9.275	[-]	10.365	[-]	10.91	[-]	10.588	[-]	10.661	[-]	9.815	[-]
THC0290_T_0019	1	15993	3	44	NA	0.886038	NA	0.999	NA	NA	NA	NA	NA	gacgtattaaaagtttgggtccaagatattgcccTTCTATCGAAGATAAGATAAATCgttt	[~]	10.981	[~]	10.865	[~]	10.735	[~]	10.693	[~]	10.577	[~]	9.804	[~]	10.985	[~]	10.104	[~]	10.694	[~]	9.91	[~]	10.724	[~]	10.448	[~]	10.267	[~]	10.659	[~]	11.138	[~]	11.11	[~]	10.101	[~]
THC0290_T_0020	-1	23531	3	681	NA	0.954682	NA	0.994668	259	THC0290_0018	NA	Probable cAMP-binding protein	THC0290_v2_0019	catttctcaggaacaatatttgcaaacaaaatacCACTTGCACTAAAAACATTATTAgctt	[~]	10.495	[~]	10.515	[-]	10.318	[~]	10.544	[~]	10.742	[~]	10.801	[~]	10.645	[~]	11.032	[-]	10.356	[~]	10.04	[~]	10.347	[-]	10.291	[-]	9.892	[~]	10.722	[~]	10.57	[~]	10.404	[~]	11.07	[~]
THC0290_T_0021	-1	24970	207	432	SM3	0.719427	SigA	0.999	0	THC0290_0020	holB	Probable DNA polymerase III, delta prime subunit	THC0290_v2_0021	gcagcacaaaccataTTGcaaaatttattcTATTCTACTATATTTGCaatatgcagtttag	[+]	10.321	[+]	10.298	[+]	10.295	[+]	10.274	[+]	10.577	[+]	10.808	[+]	10.7	[+]	10.826	[+]	11.076	[+]	11.103	[+]	10.314	[+]	10.477	[+]	11.498	[+]	11.088	[+]	10.58	[+]	10.497	[+]	11.099	[+]
THC0290_T_0022	1	25239	94	207	SM4	1	Sig54	1	1;94;160	THC0290_N_0019;THC0290_N_0020;THC0290_0021	NA;NA;remF	new transcription segment;new transcription segment;Gliding motility protein RemF precursor	NA;NA;NA	TTttttacgttaaaaatgtttTTGGCACGATTTTAGTTGTGtaatttaaaagaaagaaatt	[+]	12.47	[+]	12.733	[+]	12.843	[+]	12.814	[+]	12.738	[+]	12.855	[+]	12.247	[+]	12.95	[+]	12.257	[+]	12.432	[+]	12.871	[+]	12.983	[+]	12.673	[+]	12.129	[+]	12.74	[+]	13.268	[+]	12.015	[+]
THC0290_T_0023	1	25333	49	122	SM5	0.98867	ND	0.98867	0;66	THC0290_N_0020;THC0290_0021	NA;remF	new transcription segment;Gliding motility protein RemF precursor	NA;NA	acaagttaaattaaTtttttttattaaaaagttaTTAGAAACTTGCAGTTAgaatttaaag	[-]	9.483	[-]	9.534	[-]	9.732	[-]	9.857	[-]	9.007	[-]	8.889	[-]	9.213	[-]	10.597	[-]	10.283	[-]	10.575	[-]	9.738	[-]	10.177	[-]	10.064	[-]	10.366	[-]	10.258	[-]	10.519	[~]	11.257	[~]
THC0290_T_0024	1	29023	7	318	NA	0.902699	NA	0.986338	NA	NA	NA	NA	NA	aaaatttagagaagatAACGCaataggtttcggaTTATTTCAACGCAACTACGGAGTACta	[~]	11.904	[~]	11.882	[~]	12.196	[~]	12.096	[~]	12.097	[~]	11.844	[~]	12.191	[~]	11.707	[~]	12.42	[~]	12.287	[~]	12.16	[~]	12.314	[~]	11.8	[~]	11.265	[~]	12.56	[~]	12.721	[~]	11.662	[~]
THC0290_T_0025	1	29610	4	462	NA	0.924025	NA	0.999667	NA	NA	NA	NA	NA	cactcgaaaaaGGAAtaggaaatctatcaaacctGGGCTTATCACACGAAATCACATtagc	[~]	11.868	[~]	11.785	[~]	12.378	[~]	12.291	[~]	12.325	[~]	12.715	[~]	12.905	[~]	9.193	[~]	12.686	[~]	12.988	[~]	12.534	[~]	12.425	[~]	12.431	[~]	11.7	[~]	12.984	[~]	13.221	[~]	12.1	[~]
THC0290_T_0026	1	33357	9	59	NA	0.997667	NA	1	NA	NA	NA	NA	NA	gccctgtaaggGCTAagtatgcgtttatgtcgttAGAAGGAGATCAAAATATTACTGgaga	[~]	12.871	[~]	12.846	[~]	13.273	[~]	13.394	[~]	13.67	[~]	12.99	[~]	13.603	[~]	10.964	[~]	13.808	[~]	12.983	[~]	13.276	[~]	13.331	[~]	11.919	[~]	12.074	[~]	13.537	[~]	13.745	[~]	12.823	[~]
THC0290_T_0027	1	33659	8	1343	NA	0.742086	NA	0.997334	NA	NA	NA	NA	NA	agtgtagaaattatagagcctcaaatttcaataacAAAATTAATTAAGAATCTTGCGgggg	[~]	12.414	[~]	12.474	[~]	12.983	[~]	13.111	[~]	13.363	[~]	13.131	[~]	13.339	[~]	10.319	[~]	13.526	[~]	13.07	[~]	13.018	[~]	13.006	[~]	12.221	[~]	11.661	[~]	13.356	[~]	13.629	[~]	12.121	[~]
THC0290_T_0028	1	35678	5	1724	NA	0.55948	NA	0.863712	NA	NA	NA	NA	NA	actttaggtaccgcaatatgcttaacaaccccagTTACTATTATAATAATGCAACCAgcag	[~]	13.382	[~]	13.315	[~]	13.762	[~]	13.852	[~]	14.047	[~]	13.656	[~]	14.063	[~]	10.902	[~]	14.057	[~]	13.254	[~]	13.909	[~]	13.642	[~]	12.374	[~]	11.798	[~]	13.644	[~]	13.933	[~]	12.735	[~]
THC0290_T_0029	1	39578	14	1705	NA	0.496834	NA	0.951683	NA	NA	NA	NA	NA	tctggcggttctgcaCcagcaaattatacttatACTTTATTATCAAACGCTTCGGTAGtac	[~]	12.965	[-]	12.792	[~]	13.618	[~]	13.668	[-]	13.908	[~]	13.638	[-]	13.921	[~]	10.942	[~]	13.7	[~]	12.967	[~]	13.633	[-]	13.183	[~]	12.099	[~]	11.214	[~]	13.391	[~]	13.652	[~]	12.394	[~]
THC0290_T_0030	1	41911	7	399	NA	0.943019	NA	1	NA	NA	NA	NA	NA	agttacttgttttggaagcagagatggtcaaattATACTAAAAATAAAAGGTTATGTAGgg	[~]	12.436	[~]	12.309	[~]	12.893	[~]	13.023	[~]	13.343	[~]	12.998	[~]	13.505	[~]	10.812	[~]	13.402	[~]	12.575	[~]	12.935	[~]	12.679	[~]	11.73	[~]	11.057	[~]	12.959	[~]	13.273	[~]	12.208	[~]
THC0290_T_0031	1	46491	3	659	NA	0.972009	NA	0.999	NA	NA	NA	NA	NA	aaaaagcaattGCAAaccattttgctacagatacTATCGCCATAAAAAGTAAAATGTcttt	[~]	12.153	[~]	12.161	[~]	12.703	[~]	12.703	[~]	12.468	[~]	12.383	[~]	12.247	[~]	11.307	[~]	10.654	[~]	10.87	[~]	12.507	[~]	12.522	[~]	11.498	[~]	11.134	[~]	11.515	[~]	11.447	[~]	11.48	[~]
THC0290_T_0032	1	46845	3	377	NA	0.992669	NA	1	NA	NA	NA	NA	NA	taaaaaacgtttctaaaactaaattttacaaagtAAAAAGCGGAGACAATCTTAGCGatat	[~]	12.104	[~]	12.056	[~]	12.346	[~]	12.308	[~]	12.22	[~]	12.288	[~]	11.818	[~]	11.503	[~]	10.231	[~]	10.726	[~]	12.414	[~]	12.343	[~]	11	[~]	10.872	[~]	11.306	[~]	11.492	[~]	10.962	[~]
THC0290_T_0033	1	47380	25	164	NA	0.556814	NA	0.999667	293;349	THC0290_N_0027;THC0290_0029	NA;elaA	new transcription segment;ElaA protein	NA;THC0290_v2_0030	tttttacaccatcaaaaaaGgagataatatttcgTTAATTGCTAAAAAAAATGACGTTAcc	[~]	11.431	[~]	11.625	[~]	11.979	[~]	11.876	[~]	11.757	[~]	11.689	[~]	11.262	[~]	11.399	[~]	9.922	[~]	10.25	[~]	11.886	[~]	12.038	[~]	10.882	[~]	11.043	[~]	11.297	[~]	11.168	[~]	11.011	[~]
THC0290_T_0034	-1	48702	3	578	NA	0.944352	NA	0.999667	NA	NA	NA	NA	NA	gtgcttctattattcagaaaaagctagttgaaagTGGTATAAAAAACAAAATCATTGttac	[~]	7.996	[~]	8.288	[~]	8.746	[~]	8.712	[~]	8.856	[~]	8.874	[~]	8.488	[~]	9.48	[~]	8.805	[~]	8.418	[~]	8.734	[~]	8.711	[~]	9.183	[~]	9.039	[~]	8.145	[~]	8.378	[~]	8.477	[~]
THC0290_T_0035	1	49568	35	1006	SM2	0.934688	SigA	0.999667	1;52	THC0290_N_0030;THC0290_0031	NA;yceA	new transcription segment;Protein of unknown function YceA	NA;THC0290_v2_0032	actgcctttttagaTTTCtaaattatataAAAAGTTATAAATTTGTACCTGAATtcttcca	[+]	11.712	[+]	11.717	[+]	11.853	[+]	11.819	[+]	12.404	[+]	12.788	[+]	12.734	[+]	13.027	[+]	13.639	[+]	13.599	[+]	11.892	[+]	11.91	[+]	13.06	[+]	12.717	[+]	12.499	[+]	12.537	[+]	14.31	[+]
THC0290_T_0036	1	49622	24	1007	SM6	0.875042	SigECF	0.875042	-2	THC0290_0031	yceA	Protein of unknown function YceA	THC0290_v2_0032	tcttccaactagaatttACAACatatttctaactTAAACGTTTATAGCATGcaactgtata	[+]	11.722	[+]	11.725	[+]	11.933	[+]	11.822	[+]	12.416	[+]	12.882	[+]	12.751	[+]	13.107	[+]	13.643	[+]	13.527	[+]	11.899	[+]	11.947	[+]	13.033	[+]	12.842	[+]	12.506	[+]	12.538	[+]	14.365	[+]
THC0290_T_0037	1	50026	4	66	SM1	0.840387	SigA	0.991336	NA	NA	NA	NA	NA	TTTaaatgacgaaacttttgatgTTACAAATATTGGTGTGCATTTGAAagccaatgaattc	[~]	10.837	[~]	11.111	[~]	11.03	[~]	10.992	[~]	11.668	[~]	11.668	[~]	12.036	[~]	12.048	[~]	13.077	[~]	12.833	[~]	10.759	[~]	10.938	[~]	11.874	[~]	11.616	[~]	11.681	[~]	11.81	[~]	11.695	[~]
THC0290_T_0038	1	50193	3	119	NA	0.472509	NA	0.950683	NA	NA	NA	NA	NA	ttagagaaagtttgccaataattaacgagcaactaAAAGATTTTAAAGAAGACAAAAacct	[~]	10.875	[~]	10.575	[~]	10.322	[~]	10.463	[~]	11.059	[~]	11.25	[~]	11.481	[~]	11.942	[~]	12.719	[~]	12.526	[~]	10.24	[~]	10.185	[~]	11.685	[~]	11.773	[~]	11.446	[~]	11.638	[~]	11.508	[~]
THC0290_T_0039	1	51737	4	364	NA	0.994335	NA	1	NA	NA	NA	NA	NA	gacaattaattCGCGattttgcttccgcttttagTACAAGAGTCGAAATGAAACAAGttgg	[~]	12.017	[~]	11.835	[~]	11.896	[~]	11.905	[~]	11.758	[~]	11.727	[~]	11.882	[~]	10.444	[~]	11.446	[~]	11.374	[~]	11.971	[~]	11.906	[~]	11.116	[~]	11.713	[~]	11.328	[~]	11.172	[+]	12.431	[~]
THC0290_T_0040	1	51916	3	1640	NA	0.78907	NA	0.998334	NA	NA	NA	NA	NA	ttgtcattaaaccctcaaaagctagcaggacaatGTGGCAAACTAAAATGTTGTTTAAAtt	[~]	11.527	[~]	11.551	[~]	11.638	[~]	11.628	[~]	11.371	[~]	11.2	[~]	11.574	[~]	10.085	[~]	10.737	[~]	10.854	[~]	11.787	[~]	11.675	[~]	10.474	[-]	10.348	[~]	10.979	[~]	10.747	[-]	10.685	[-]
THC0290_T_0041	1	53338	3	244	NA	0.525492	NA	0.996668	NA	NA	NA	NA	NA	ttacccaaacacttggtcgatgcgctaatatctACCGAAGACGAACGTTTTAGAGaacact	[~]	12.134	[~]	12.105	[~]	12.293	[~]	12.236	[~]	11.944	[~]	12.249	[~]	11.816	[~]	10.811	[~]	10.787	[~]	11.024	[~]	12.226	[~]	12.219	[~]	10.844	[~]	9.946	[~]	11.198	[~]	11.119	[~]	10.318	[~]
THC0290_T_0042	1	54187	8	277	NA	0.981006	NA	0.999667	NA	NA	NA	NA	NA	GAACGttggagaatcatgTCAGAAGAAGGAAAAGACGAAGCCGaaatcataaaatcattta	[~]	12.337	[~]	12.261	[~]	12.993	[~]	12.677	[~]	12.573	[~]	12.698	[~]	12.464	[~]	10.482	[+]	11.743	[~]	11.596	[~]	13.008	[~]	12.704	[~]	11.141	[~]	9.91	[~]	11.587	[~]	11.478	[~]	10.644	[~]
THC0290_T_0043	1	54447	7	81	NA	0.994002	NA	1	NA	NA	NA	NA	NA	acgacaagtagggtctacattcaaaccgtttctaTACGCCACAGCAATCGAACAATTAGga	[~]	12.419	[~]	12.329	[~]	12.656	[~]	12.565	[~]	12.244	[~]	12.273	[~]	12.302	[~]	9.148	[~]	11.363	[~]	11.423	[~]	12.682	[~]	12.484	[~]	11.072	[-]	10.158	[~]	11.581	[~]	11.422	[-]	11.267	[~]
THC0290_T_0044	1	54875	6	1739	NA	0.752749	NA	0.999667	483	THC0290_N_0032	NA	new transcription segment	NA	acgtcatctacgaaccaaaaatggaatctagagaCGTACTTAGCAAAGACATCGCATacgc	[~]	12.471	[~]	12.494	[~]	12.92	[~]	12.786	[~]	12.705	[~]	12.755	[~]	12.779	[~]	8.988	[~]	11.847	[~]	11.839	[~]	13.005	[~]	12.714	[~]	11.221	[~]	10.472	[~]	11.684	[~]	11.655	[~]	11.289	[~]
THC0290_T_0045	-1	62566	4	400	SM1	0.788737	SigA	0.983672	13	THC0290_0038	NA	Probable transmembrane protein of unknown function	THC0290_v2_0039	tGAACTttgcggaaatctttgtgaatTTTGTAGTTAAATATTACATTTACAaaaaacaaaa	[~]	9.059	[~]	9.095	[~]	9.535	[~]	9.501	[~]	9.49	[~]	9.15	[~]	9.28	[~]	9.495	[+]	8.886	[+]	8.807	[~]	9.492	[~]	9.468	[+]	9.528	[+]	9.912	[+]	8.811	[+]	8.743	[+]	10.155	[+]
THC0290_T_0046	-1	63436	21	306	SM1	0.938354	SigA	0.999334	1;54	THC0290_N_0036;THC0290_0039	NA;NA	new transcription segment;Protein of unknown function	NA;THC0290_v2_0040	AATtagagacaaattacaaaaatTACCATCATTTTTTTTATATTCGTGaaatacttaacta	[~]	9.778	[~]	10.029	[+]	10.674	[+]	10.571	[+]	10.927	[+]	11.408	[+]	10.581	[+]	10.656	[+]	10.298	[+]	11.044	[+]	10.616	[+]	10.89	[+]	11.284	[+]	10.601	[+]	9.671	[+]	9.818	[+]	11.599	[+]
THC0290_T_0047	1	63877	3	631	SM2	0.349217	SigA	0.593136	NA	NA	NA	NA	NA	ggcttcttcgaggtttttagggatttcttgGCAAACTGTACCTTTGGGCCAAGcagaaatc	[+]	5.934	[+]	5.838	[+]	6.288	[+]	6.356	[+]	6.288	[+]	6.319	[+]	6.522	[~]	5.661	[+]	7.842	[+]	6.906	[+]	6.248	[+]	6.679	[+]	7.049	[+]	8.21	[+]	7.693	[+]	7.479	[+]	8.727	[+]
THC0290_T_0048	-1	63958	4	438	SM1	0.969677	SigA	0.996668	0	THC0290_0040	ogt1	Methylated-DNA--[protein]-cysteine S-methyltransferase	THC0290_v2_0041	ATTttttcatcaaaaatcgtttcCAAAGCAAAAAAACATATCTTTAAAttatggaaacaac	[-]	8.807	[-]	8.762	[-]	9.001	[-]	8.666	[-]	8.242	[-]	8.737	[-]	7.722	[-]	5.525	[-]	7.34	[-]	7.345	[-]	9.199	[-]	8.924	[-]	8.568	[-]	7.997	[-]	7.627	[-]	7.975	[-]	7.389	[-]
THC0290_T_0049	-1	64180	12	1349	SM1	0.610463	SigA	0.993336	1;222	THC0290_N_0037;THC0290_0040	NA;ogt1	new transcription segment;Methylated-DNA--[protein]-cysteine S-methyltransferase	NA;THC0290_v2_0041	TTTtctaaaaaaaatcagaaataAAAAGGTTTATTTTATAAATTTATtaaactcaaataaa	[+]	11.725	[+]	11.906	[+]	11.689	[+]	11.737	[+]	11.065	[+]	11.902	[+]	10.798	[+]	11.488	[+]	10.658	[+]	11.273	[+]	11.134	[~]	11.049	[+]	12.441	[+]	11.735	[~]	12.768	[+]	13.176	[+]	9.617	[+]
THC0290_T_0050	-1	64653	14	1351	SM1	0.967677	SigA	1	16;474	THC0290_0041;THC0290_N_0037	NA;NA	Cytochrome c551/c552 family protein;new transcription segment	THC0290_v2_0042;NA	TGAtgatatttatcatttttttaAGTCATAACATAGCCTACTTTTGAAgtaacaaaaaaaa	[~]	11.023	[~]	10.939	[~]	10.381	[~]	10.403	[~]	9.959	[~]	10.188	[-]	9.225	[-]	7.799	[-]	6.316	[~]	6.928	[~]	10.004	[~]	10.002	[+]	11.162	[+]	11.038	[+]	11.412	[+]	11.647	[+]	9.154	[~]
THC0290_T_0051	-1	73975	24	602	SM1	0.97934	SigA	0.999667	23	THC0290_0051	hemA	Glutamyl-tRNA reductase	THC0290_v2_0052	TAGaacttctagcgttacttttaTAAATAGGATAACTATACTTTTGCTtaactttttgaat	[+]	11.795	[+]	11.745	[+]	11.471	[+]	11.659	[+]	12.489	[+]	13.334	[+]	13.069	[+]	12.598	[+]	13.143	[+]	14.259	[+]	11.45	[+]	11.318	[+]	13.184	[~]	12.125	[+]	12.498	[+]	12.69	[+]	12.159	[+]
THC0290_T_0052	1	74093	3	941	SM1	0.986005	SigA	1	6;88	THC0290_N_0042;THC0290_0052	NA;NA	new transcription segment;Probable transcriptional regulator, AraC family	NA;THC0290_v2_0053	TTTTtttattaaaaaatagatttcTATCGTTATTTCTTTTATTTTTGCAttaaaatcaagc	[+]	8.596	[+]	8.629	[+]	8.023	[+]	7.976	[+]	9.096	[+]	10.422	[+]	9.645	[+]	10.144	[+]	10.119	[+]	11.309	[+]	7.85	[+]	8.117	[+]	11.626	[+]	11.089	[+]	10.129	[+]	10.125	[+]	10.695	[+]
THC0290_T_0053	1	75021	5	1244	NA	0.391536	NA	0.999667	30	THC0290_0053	hemH	Ferrochelatase	THC0290_v2_0054	gaagccattttatagccgcttttaaaaagaaattcgCTACAACACCAAAGAAATATTTAtt	[+]	11.369	[+]	11.313	[+]	10.732	[+]	10.858	[+]	12.041	[+]	11.791	[+]	12.831	[~]	10.558	[~]	12.629	[~]	12.348	[+]	10.665	[+]	10.617	[~]	11.765	[~]	11.634	[~]	11.854	[~]	11.83	[~]	11.711	[~]
THC0290_T_0054	1	78418	67	237	NA	0.52116	NA	0.992669	490	THC0290_N_0044	NA	new transcription segment	NA	ttagccgccaaaggacaagaaatcttattcgattttATCGAAAACATGAAAACACCAGtta	[~]	11.435	[~]	11.206	[~]	11.014	[~]	11.135	[~]	12.086	[~]	12.19	[~]	12.807	[~]	12.354	[~]	12.23	[~]	11.886	[~]	10.914	[~]	10.802	[~]	10.223	[~]	10.533	[~]	11.319	[~]	11.568	[+]	11.506	[~]
THC0290_T_0055	1	78431	11	1517	NA	0.789404	NA	0.998334	477	THC0290_N_0044	NA	new transcription segment	NA	gacaagaaatcttattcgattttatcgaaaacatgaaaacaccagttattgcagcaattaa	[~]	10.747	[~]	10.638	[~]	10.395	[~]	10.549	[~]	11.598	[~]	11.553	[~]	12.281	[~]	11.894	[~]	11.763	[~]	11.305	[~]	10.332	[~]	10.371	[~]	9.705	[~]	9.636	[~]	10.874	[~]	11.119	[~]	10.531	[~]
THC0290_T_0056	-1	80786	14	1636	SM1	0.915695	SigA	0.985338	162	THC0290_0058	NA	Putative acyl-[acyl-carrier-protein] desaturase	NA	GTTgtaccaattagtattaataaTTCATGGAAAATGGTTAAATTTGGAgcatttcctatgg	[~]	10.574	[~]	10.619	[-]	10.476	[~]	10.571	[-]	11.058	[-]	10.681	[-]	11.635	[-]	10.474	[-]	11.975	[-]	11.733	[~]	10.273	[~]	10.446	[-]	11.307	[~]	11.683	[-]	11.775	[~]	11.95	[-]	11.436	[~]
THC0290_T_0057	-1	81911	9	1121	SM1	0.756748	SigA	1	26;437	THC0290_0060;THC0290_N_0047	yqiW;NA	Protein of unknown function YqiW;new transcription segment	NA;NA	AAActattaacttctctattactTCCTTACAAACTTTGTAACTTTGCAaatcaataacatt	[+]	12.106	[+]	12.022	[+]	12.111	[+]	12.119	[+]	12.35	[+]	12.577	[+]	12.747	[~]	11.555	[+]	12.988	[+]	13.372	[+]	12.011	[+]	12.01	[+]	14.753	[+]	14.562	[+]	13.978	[+]	13.923	[+]	14.782	[+]
THC0290_T_0058	1	82089	7	669	SM2	0.537488	SigA	0.946018	NA	NA	NA	NA	NA	ggtatcaatttacttcaataaaattggcaaAACATCAGTAATTTTGTCTAATGTTctaaaa	[+]	5.657	[+]	5.749	[+]	6.387	[+]	6.22	[+]	6.861	[+]	7.736	[+]	7.472	[~]	7.59	[+]	7.685	[+]	8.555	[+]	6.008	[+]	6.103	[+]	8.275	[+]	6.05	[+]	6.364	[+]	6.987	[~]	6.308	[+]
THC0290_T_0059	-1	84849	16	1791	NA	0.448184	NA	0.510163	-3	THC0290_0062	metG	Methionine--tRNA ligase	THC0290_v2_0063	tggcgaattattatttttaattcgtaatttttaatttttaattgattatgattcagaatcc	[+]	11.881	[+]	11.74	[+]	11.666	[+]	11.648	[+]	11.333	[+]	11.714	[+]	11.529	[+]	10.166	[+]	11.364	[+]	11.575	[+]	11.736	[+]	11.53	[+]	10.515	[+]	10.043	[+]	10.431	[+]	10.69	[+]	10.223	[+]
THC0290_T_0060	1	85149	21	760	SM1	0.995002	SigA	1	24;263	THC0290_0063;THC0290_0064	NA;NA	Hypothetical protein;Probable transmembrane protein of unknown function	NA;NA	TTTattatttttttaatataaatTCATTCATGTTTAACTATATTTGCTaaactaaatataa	[+]	11.918	[+]	12.032	[+]	12.203	[+]	12.295	[+]	12.619	[+]	13.52	[+]	12.6	[+]	13.936	[+]	12.741	[+]	13.425	[+]	12.151	[+]	12.161	[+]	14.369	[+]	13.784	[+]	12.736	[+]	12.64	[+]	15.035	[+]
THC0290_T_0061	1	86643	3	589	NA	0.425192	NA	0.980673	NA	NA	NA	NA	NA	gataatttaaaattcgccaaagatttactcaccagTTGGGGATTAAACGTAAAAATTGgaa	[-]	9.826	[-]	9.668	[-]	9.657	[-]	9.743	[-]	9.693	[-]	9.438	[-]	9.466	[-]	8.767	[-]	8.145	[-]	7.14	[-]	9.566	[-]	9.442	[-]	8.264	[-]	9.081	[-]	8.18	[-]	8.112	[-]	8.931	[-]
THC0290_T_0062	1	89687	4	1135	SM2	0.853049	SigA	0.992003	NA	NA	NA	NA	NA	gctttttccttagcTTCtagttgtgctaaTAAATCACGATTTTTGTCCATGTTTgctttta	[+]	6.891	[+]	6.699	[+]	7.224	[+]	7.335	[+]	6.892	[+]	7.83	[+]	7.759	[+]	8.104	[+]	8.642	[+]	9.186	[+]	6.95	[+]	7.18	[+]	9.81	[+]	9.746	[+]	8.822	[+]	7.756	[+]	10.866	[+]
THC0290_T_0063	-1	90863	6	1460	SM1	0.522826	SigA	0.996668	21	THC0290_0069	xth	Exodeoxyribonuclease III	THC0290_v2_0070	aaAGTAAataaaatttatttttaaaatTGCCTATTTTTTCTATACTTTTGAtaaaaaagac	[+]	11.835	[+]	11.652	[+]	12.01	[+]	11.828	[+]	11.207	[+]	11.692	[+]	10.977	[+]	10.494	[+]	10.675	[+]	11.268	[+]	12.204	[+]	12.041	[+]	11.886	[+]	11.501	[+]	10.498	[+]	10.214	[+]	11.825	[+]
THC0290_T_0064	1	91018	82	1679	SM1	0.980673	SigA	1	21	THC0290_0070	NA	Putative hemolysin	THC0290_v2_0071	TAAgatgaaagtttttcttaaaaTTAGACAAGTTTTGTTATCTTTGCTtttcgccaaaaat	[+]	12.305	[+]	12.241	[+]	11.891	[+]	11.912	[+]	11.968	[+]	11.709	[+]	11.784	[+]	11.603	[+]	11.616	[+]	11.825	[+]	12.254	[+]	12.278	[+]	11.952	[+]	11.454	[+]	11.55	[+]	11.662	[+]	11.232	[+]
THC0290_T_0065	1	91420	6	46	NA	0.4995	NA	0.954015	NA	NA	NA	NA	NA	ttgctaattttttacttcataggatagagcctatgaAGCCTTATATTatgcctgtaaatcc	[~]	12.009	[~]	12.046	[~]	11.524	[~]	11.679	[~]	11.613	[~]	11.241	[~]	11.436	[~]	11.38	[~]	11.068	[~]	11.05	[~]	11.955	[~]	11.949	[~]	11.178	[~]	11	[~]	11.231	[~]	11.345	[~]	10.535	[~]
THC0290_T_0066	-1	93725	3	500	NA	0.876708	NA	1	NA	NA	NA	NA	NA	taggcatgctgctttcgctaatgaacaacctcaaCAAAGCCAACAAAGAAATTCGCTccgg	[-]	10.072	[-]	10.16	[-]	10.623	[-]	10.521	[-]	10.529	[-]	10.736	[-]	10.893	[-]	7.703	[-]	10.437	[-]	10.225	[-]	10.727	[-]	10.622	[-]	10.096	[-]	9.631	[-]	9.941	[-]	9.581	[-]	9.726	[-]
THC0290_T_0067	-1	93737	3	440	NA	0.583472	NA	0.986338	NA	NA	NA	NA	NA	cagagcacacactaggcatgctgctttcgctaatGAACAACCTCAACAAAGCCAACAaaga	[-]	10.158	[-]	10.169	[-]	10.529	[-]	10.521	[-]	10.554	[-]	10.745	[-]	10.906	[-]	7.581	[~]	10.498	[~]	10.239	[-]	10.729	[-]	10.669	[-]	10.116	[-]	9.65	[-]	10.007	[-]	9.582	[-]	9.79	[-]
THC0290_T_0068	-1	94164	16	1553	SM1	0.954349	SigA	0.999334	1;61	THC0290_N_0056;THC0290_0071	NA;NA	new transcription segment;Putative phosphoglycerate dehydrogenase	NA;THC0290_v2_0072	ATTcgtaagtatttatattataaATGTACCAGAATTAGTATATTTATCatataaatacctt	[+]	11.72	[+]	11.701	[+]	12.176	[+]	11.556	[+]	11.038	[+]	11.793	[+]	11.638	[+]	9.534	[+]	10.994	[+]	11.845	[+]	12.11	[+]	11.926	[+]	12.362	[+]	11.916	[+]	11.036	[+]	10.465	[+]	12.911	[+]
THC0290_T_0069	-1	95796	3	1716	NA	0.993336	NA	1	NA	NA	NA	NA	NA	agtagctcgaatcatgcaaaaatacgacctagaaGCAATTCCTGTAACCGACGAATTAGgc	[~]	11.975	[~]	11.961	[~]	12.141	[~]	12.087	[~]	11.366	[~]	11.424	[~]	11.079	[~]	9.976	[~]	10.741	[~]	10.582	[~]	12.141	[~]	12.001	[~]	10.147	[~]	9.878	[~]	10.482	[~]	10.207	[~]	10.388	[~]
THC0290_T_0070	-1	96592	170	445	SM2	0.676108	SigA	0.999334	90	THC0290_0073	mgtE	Mg2+ transporter MgtE	THC0290_v2_0074	acaacgaagaaaaacATTGcgaaacagtttAAAAACATTAAATTTGTCGGATATTctgcgg	[~]	12.775	[~]	12.957	[~]	13.243	[~]	13.065	[~]	12.535	[~]	12.769	[~]	12.246	[~]	11.172	[+]	11.54	[+]	12.026	[~]	13.17	[~]	13.182	[+]	12.024	[+]	11.216	[~]	11.489	[~]	11.528	[+]	11.165	[+]
THC0290_T_0071	-1	96944	5	1404	NA	0.965678	NA	0.997667	442	THC0290_0073	mgtE	Mg2+ transporter MgtE	THC0290_v2_0074	aaattttcgaaGGCAaacaatttgccattattggAAATTTCCCGTACAATATTTCGAcaca	[~]	11.842	[~]	12.045	[~]	12.222	[~]	12.233	[~]	11.475	[~]	11.43	[~]	10.884	[~]	10.314	[+]	9.889	[+]	9.768	[~]	12.119	[~]	12.057	[~]	10.022	[~]	9.969	[~]	10.41	[~]	10.382	[+]	9.473	[+]
THC0290_T_0072	-1	97006	4	1617	NA	0.785405	NA	0.997334	NA	NA	NA	NA	NA	aaattacccgaaactaaaagataaaatcatctctAAAGATTTCTTAAAATACAATATtaac	[-]	10.807	[-]	11.119	[-]	11.402	[-]	11.383	[-]	10.73	[-]	10.865	[-]	10.184	[-]	9.775	[-]	8.699	[-]	9.299	[-]	11.301	[-]	11.287	[-]	9.748	[-]	9.008	[-]	9.806	[-]	9.585	[-]	7.625	[-]
THC0290_T_0073	1	104147	22	600	SM1	0.998001	SigA	0.999667	18	THC0290_0081	mntH	Probable manganese transport protein mntH	THC0290_v2_0082	AAAACTaaaaaatatattaacataaAACAAAATATATAATTATATTTGCTaaatttaattt	[+]	11.673	[+]	11.712	[+]	12.597	[+]	12.558	[+]	13.173	[+]	13.54	[+]	13.149	[+]	12.988	[+]	14.048	[+]	14.101	[+]	12.52	[+]	12.538	[+]	13.249	[+]	12.873	[+]	12.898	[+]	13.206	[+]	12.202	[+]
THC0290_T_0074	-1	107454	4	789	SM1	0.857381	SigA	0.88004	NA	NA	NA	NA	NA	AAAAATaggttaataccgttttaatTTAAAAAAAAACGGTAATATTTGATacacatattgt	[~]	7.012	[~]	6.938	[~]	7.397	[~]	7.244	[~]	6.699	[~]	7.344	[-]	5.968	[+]	7.039	[~]	6.614	[~]	6.977	[~]	7.26	[-]	6.642	[~]	8.016	[~]	7.284	[~]	6.962	[~]	6.857	[+]	8.391	[+]
THC0290_T_0075	1	108476	9	136	SM2	0.785738	SigA	0.994335	473	THC0290_N_0064	NA	new transcription segment	NA	gagtgatgagctggcgaatcatttgaaagaTAATTTGCTTTCTTTGTACCGCGATaataaa	[~]	9.678	[~]	9.533	[~]	10.39	[~]	10.398	[~]	10.625	[~]	9.584	[~]	10.338	[+]	9.618	[~]	8.96	[~]	8.507	[~]	10.469	[~]	10.39	[~]	8.487	[~]	8.687	[~]	9.541	[~]	10.17	[+]	9.175	[+]
THC0290_T_0076	-1	109130	3870	765	NA	0.576475	NA	0.837054	0;74	THC0290_tRNA_0002;THC0290_N_0065	NA;NA	transfer RNA-Asn;new transcription segment	NA;NA	gtacaaggctaaaaaagttcatacaacaataaaGTTCATAACATACAGTttccttcttagc	[~]	8.262	[~]	8.461	[~]	8.278	[-]	8.378	[~]	8.715	[~]	10.18	[~]	9.987	[+]	10.824	[+]	12.104	[+]	12.518	[~]	8.313	[~]	8.782	[+]	11.726	[+]	11.646	[~]	10.578	[~]	10.416	[+]	12.082	[+]
THC0290_T_0077	1	110516	5	701	SM1	0.875042	SigA	0.999667	NA	NA	NA	NA	NA	TAATgagaatccaagatctataaaAAGATAGAATTTTTCTACTTTTACTttaaacattcgt	[+]	6.379	[+]	6.455	[+]	6.962	[+]	6.698	[+]	7.422	[+]	7.75	[+]	6.898	[+]	8.914	[+]	7.917	[+]	7.796	[+]	6.797	[+]	6.999	[+]	7.723	[+]	6.669	[+]	6.868	[+]	7.176	[+]	7.673	[+]
THC0290_T_0078	-1	110637	11	185	SM1	0.98967	SigA	1	25	THC0290_0085	NA	Probable M50 family membrane-associated zinc metalloprotease	THC0290_v2_0086	ATTcggcacatatattgtaaaaaGTAAGGCGAAAGTCTTACTTTTGCTttatacataaaaa	[~]	10.399	[~]	10.672	[~]	10.679	[~]	10.691	[~]	10.464	[~]	10.676	[~]	10.124	[~]	10.541	[~]	10.137	[~]	10.782	[~]	10.664	[~]	10.718	[~]	11.623	[+]	11.633	[~]	10.831	[~]	10.978	[+]	11.705	[+]
THC0290_T_0079	-1	111709	6	52	NA	0.98967	NA	1	NA	NA	NA	NA	NA	acgaaaaatacGGCCacgcacaatttggctggggAGGCGGAATGGAACATACAACCGtatc	[~]	10.658	[~]	10.802	[~]	11.493	[~]	11.532	[~]	11.625	[~]	11.609	[~]	11.685	[+]	9.039	[~]	12.191	[~]	11.843	[~]	11.227	[~]	11.136	[~]	11.293	[~]	11.313	[~]	11.307	[~]	11.356	[~]	11.124	[~]
THC0290_T_0080	-1	116055	5	114	SM1	0.733089	SigA	0.843386	NA	NA	NA	NA	NA	AAgccaaaacaaaagccaaagcAATGATAGAAAATGTTATTTTAGCTtacgaaaacagaat	[~]	12.892	[~]	13.013	[~]	13.344	[~]	13.181	[~]	12.245	[~]	11.976	[~]	11.904	[~]	9.584	[~]	10.351	[~]	10.476	[~]	13.591	[~]	13.699	[+]	9.964	[~]	9.065	[~]	10.714	[~]	10.712	[~]	9.905	[~]
THC0290_T_0081	-1	116532	5	1801	NA	0.771076	NA	0.982006	NA	NA	NA	NA	NA	aaccagcagaagcaaaattagaagccaataaaattTTAGCTTTAGAAATCGCAATGTCTAa	[~]	13.384	[~]	13.371	[+]	13.944	[+]	13.88	[+]	12.809	[+]	12.841	[+]	12.742	[+]	10.488	[~]	10.765	[+]	11.201	[~]	14.182	[+]	14.2	[+]	10.475	[~]	9.857	[~]	11.23	[~]	11.345	[~]	10.659	[+]
THC0290_T_0082	-1	117282	10	332	NA	0.925691	NA	0.999667	48	THC0290_0090	pepO	M13 family metallopeptidase PepO precursor	THC0290_v2_0091	actattttagatatgaaaaatgtttcaaacggaaTTTATTTTATAAAAATATCATCAgaaa	[+]	11.909	[+]	11.96	[+]	12.177	[+]	12.13	[+]	11.206	[+]	10.851	[+]	10.847	[+]	9.475	[~]	9.718	[~]	9.882	[+]	12.534	[+]	12.594	[+]	10.428	[+]	13.664	[+]	13.2	[+]	11.809	[+]	12.383	[+]
THC0290_T_0083	-1	120671	4	147	SM1	0.71043	SigA	0.883705	15	THC0290_0091	NA	Probable glycoside hydrolase precursor	NA	ATGCAatcattaaaaaagacataaaATGAAAAAAACTTGCTATTTTTGACcaaacacacaa	[+]	9.748	[+]	9.74	[+]	10.205	[+]	10.032	[+]	9.656	[+]	9.819	[+]	9.41	[+]	7.829	[+]	9.431	[+]	9.616	[+]	10.572	[+]	10.393	[+]	9.75	[+]	9.737	[+]	9.308	[+]	9.443	[+]	9.938	[+]
THC0290_T_0084	1	121528	6	94	SM1	0.995668	SigA	1	21;263	THC0290_0093;THC0290_0094	feoA;feoB	Ferrous iron transport protein A;Ferrous iron transport protein B	THC0290_v2_0094;THC0290_v2_0095	AAAatgattattatcatatataaTAGTATTATTATTGTTATTTTTGTAatcttaattcaat	[+]	10.474	[+]	10.605	[+]	11.037	[+]	11.022	[+]	11.764	[+]	11.968	[+]	12.008	[+]	12.188	[+]	12.333	[+]	12.831	[+]	11.238	[+]	11.165	[+]	12.606	[+]	12.331	[+]	11.872	[+]	11.815	[+]	12.746	[+]
THC0290_T_0085	1	125886	28	1290	SM1	0.907364	SigA	0.996335	37	THC0290_0097	sdhC	Succinate dehydrogenase, cytochrome b subunit	THC0290_v2_0097	AAATAagccaccaacatttgctgatGAGATGAATTTGCGTTATTTTTGTTtaaactttttt	[+]	12.665	[+]	12.488	[+]	12.064	[+]	12.335	[+]	12.042	[+]	12.153	[+]	11.741	[+]	12.725	[+]	12.213	[+]	12.552	[+]	11.672	[+]	11.673	[+]	12.606	[+]	12.363	[+]	12.197	[+]	12.003	[+]	12.584	[+]
THC0290_T_0086	1	127496	15	1642	NA	0.998667	NA	1	NA	NA	NA	NA	NA	gtctgagtctttaagaAACTctgggcgtatttggGTTCCTAAGAAAAAAGAAGATGCAGaa	[+]	14.442	[+]	14.421	[+]	14.153	[~]	14.214	[+]	13.956	[+]	13.826	[+]	13.919	[+]	13.483	[+]	13.525	[+]	13.189	[+]	14.012	[+]	13.935	[+]	12.858	[+]	12.804	[+]	13.484	[+]	13.421	[+]	12.858	[+]
THC0290_T_0087	1	127847	5	754	NA	0.612463	NA	0.991003	NA	NA	NA	NA	NA	agaagaaaaatatggtaacttatttaccatgtaccaaaaaattaccgatgagaatccttac	[~]	13.416	[~]	13.105	[~]	12.923	[~]	13.035	[~]	12.654	[~]	12.178	[~]	12.464	[~]	12.391	[~]	12.192	[~]	11.78	[~]	12.688	[~]	12.511	[~]	11.529	[~]	11.548	[~]	12.238	[~]	12.285	[~]	11.265	[~]
THC0290_T_0088	1	129158	37	1643	NA	0.85005	NA	1	-24	THC0290_0100	sdhB	Succinate dehydrogenase, iron-sulfur protein	THC0290_v2_0100	tgtgacttttggctaaaataaaaattatgagtgcAGCAAAAAATATCAATATAAACCttaa	[+]	13.953	[+]	13.939	[+]	13.792	[+]	13.847	[+]	13.483	[+]	13.278	[+]	13.231	[+]	13.427	[+]	13.128	[~]	12.943	[+]	13.508	[+]	13.522	[~]	12.713	[+]	12.661	[+]	13.221	[+]	13.288	[+]	12.475	[~]
THC0290_T_0089	-1	130109	3	1064	SM1	0.906031	SigA	0.999667	1	THC0290_N_0075	NA	new transcription segment	NA	TATTTattggttttatattttagttAATGCCCTTTATTATTAAATTTACTgaaataacaaa	[+]	6.546	[+]	6.433	[+]	6.64	[+]	6.731	[+]	7.027	[+]	8.817	[+]	7.507	[+]	8.283	[+]	8.516	[+]	9.966	[+]	6.941	[+]	6.756	[+]	10.416	[+]	9.692	[+]	7.759	[+]	7.689	[+]	10.334	[+]
THC0290_T_0090	1	130195	3	239	SM1	0.953016	SigA	0.994002	21	THC0290_0101	dinB	DNA polymerase IV, damage-inducible protein DinB	THC0290_v2_0101	TAAaaccaataaataacttctatAAGCAATCATTTCTTTTAATTTGTAgcatgctagttta	[~]	7.864	[~]	7.916	[~]	7.494	[+]	7.296	[+]	7.025	[+]	6.762	[~]	7.053	[~]	5.861	[~]	7.21	[~]	7.582	[+]	7.234	[+]	7.382	[+]	7.947	[+]	8.356	[~]	7.562	[~]	7.168	[~]	8.347	[+]
THC0290_T_0091	1	131416	15	50	SM3	0.87904	SigA	0.998334	1;154	THC0290_N_0076;THC0290_0102	NA;NA	new transcription segment;Protein of unknown function	NA;NA	gactgtatttggctaTTTtttaacctttatTTTTTACCTAGTTTTGAaatctatatacaat	[+]	12.811	[+]	12.797	[+]	13.246	[+]	13.223	[+]	13.288	[+]	13.386	[+]	12.995	[+]	12.418	[+]	12.65	[+]	12.791	[+]	12.837	[+]	12.885	[+]	13.119	[+]	13.002	[+]	13.256	[+]	13.249	[+]	13.035	[+]
THC0290_T_0092	1	134843	4	1670	NA	0.989004	NA	1	285	THC0290_0106	NA	Protein of unknown function precursor	NA	gtaattcgcatcaaaaaattcgactcttgggatGGTGATTTAGAAAAAGAATATGACGgaa	[~]	13.547	[~]	13.561	[~]	14.196	[~]	13.977	[~]	13.882	[~]	13.674	[~]	13.486	[~]	11.528	[~]	11.307	[~]	11.603	[~]	13.901	[~]	13.866	[~]	11.459	[~]	11.113	[~]	12.42	[~]	12.452	[~]	11.477	[~]
THC0290_T_0093	-1	138034	4	974	NA	0.971343	NA	0.998001	-9	THC0290_0107	NA	Putative outer membrane protein precursor	THC0290_v2_0107	tttgcataaaaaagtactctatataaataaacacATGTATTATGAAAAATATAATTCtaat	[+]	8.442	[+]	8.482	[+]	8.573	[+]	8.596	[+]	8.873	[+]	9.038	[+]	9.074	[+]	8.95	[+]	10.596	[+]	10.562	[+]	8.327	[+]	8.415	[+]	11.222	[+]	10.982	[+]	11.177	[+]	11.178	[+]	12.849	[+]
THC0290_T_0094	-1	141185	21	1078	SM1	0.958347	SigA	1	16;252	THC0290_0111;THC0290_0110	NA;NA	Hypothetical protein;Putative plasmid stabilization system protein	NA;NA	ATTGaagatattgtaagtgaattgTTTGGGTAAAATTAGTATCTTTGAGtataaaaattat	[~]	10.904	[+]	11.034	[+]	11.379	[+]	11.299	[+]	11.793	[+]	12.614	[+]	11.608	[+]	12.799	[+]	12.124	[+]	12.922	[+]	11.301	[+]	11.384	[+]	14.111	[+]	13.291	[+]	12.374	[+]	12.106	[+]	15.148	[+]
THC0290_T_0095	-1	142099	8	1295	NA	0.866711	NA	0.999	NA	NA	NA	NA	NA	ccacaaacggcGACaattgttacatattaacagaAACCAAAACTCAAAATATATTTCgaca	[~]	10.381	[~]	10.327	[~]	10.189	[~]	10.232	[~]	9.6	[~]	9.938	[~]	9.097	[~]	7.661	[~]	8.73	[~]	8.604	[~]	10.529	[~]	10.331	[~]	8.111	[~]	7.202	[~]	7.62	[~]	8.059	[-]	5.434	[~]
THC0290_T_0096	-1	142664	3	266	NA	0.994668	NA	1	100	THC0290_0112	radA	DNA repair protein RadA	THC0290_v2_0112	aaaattaattcccgtaAAAGCaaaaggtttaaaaGGCGGCAAAGCAAAAGAAATCATCGaa	[~]	10.898	[~]	10.844	[~]	11.02	[~]	10.828	[~]	10.43	[~]	10.88	[~]	10.448	[~]	10.044	[~]	10.282	[~]	10.252	[~]	11.142	[~]	11.06	[~]	10.747	[~]	10.65	[~]	10.179	[~]	9.755	[~]	10.724	[~]
THC0290_T_0097	-1	143001	3	471	NA	0.918361	NA	0.999	437	THC0290_0112	radA	DNA repair protein RadA	THC0290_v2_0112	tagcagtcttaCCAGatagtcatgcaaaatatctTACAGACAAATACGAAACCATCCaaaa	[~]	10.101	[~]	10.184	[~]	10.45	[~]	10.301	[~]	10.097	[~]	10.295	[~]	10.013	[~]	9.731	[~]	9.751	[~]	9.837	[~]	10.47	[~]	10.523	[~]	9.829	[~]	10.231	[~]	10.059	[~]	9.948	[~]	9.419	[~]
THC0290_T_0098	-1	145209	61	925	SM1	0.902033	SigA	1	0;355	THC0290_0115;THC0290_0114	panD;NA	Aspartate 1-decarboxylase;Probable transmembrane protein of unknown function	THC0290_v2_0115;THC0290_v2_0114	CAATataaaattgattgataacaTTTCATTAAAATAATTACCTTTGTAccatgcaaattga	[~]	11.272	[~]	11.264	[~]	10.962	[~]	11.037	[+]	11.276	[+]	11.52	[+]	11.346	[+]	10.555	[+]	12.059	[+]	12.234	[~]	10.967	[~]	11.043	[+]	11.839	[+]	11.498	[+]	11.421	[+]	11.471	[+]	12.21	[+]
THC0290_T_0099	-1	145401	7	1864	SM4	0.964678	Sig54	0.964678	192	THC0290_0115	panD	Aspartate 1-decarboxylase	THC0290_v2_0115	TTTAgcagaagccaaaaaactttTTGGCACGAAAAGTGCTAATgaagttacaaaatgggtc	[+]	12.473	[+]	12.471	[+]	12.123	[+]	11.924	[+]	10.895	[+]	11.512	[~]	10.533	[+]	7.939	[~]	10.436	[+]	10.684	[+]	12.067	[~]	11.717	[+]	9.955	[~]	8.614	[~]	9.542	[+]	9.912	[~]	8.879	[+]
THC0290_T_0100	1	146147	123	740	SM1	0.623459	SigA	1	33	THC0290_0117	NA	Protein of unknown function	THC0290_v2_0117	AActtactattttagtcaatatCAACATAAATTTTTGTAAATTTGCgggtgatttgtgtcc	[+]	11.771	[+]	11.914	[+]	11.878	[+]	11.889	[+]	12.128	[+]	12.011	[+]	12.298	[+]	11.425	[+]	12.43	[+]	12.351	[+]	11.846	[+]	11.9	[+]	12.451	[+]	12.506	[+]	12.486	[+]	12.54	[+]	12.514	[+]
THC0290_T_0101	1	146931	40	1392	SM5	0.534489	ND	0.534489	58	THC0290_0118	NA	Probable lipoprotein precursor	NA	tttaacaaaatttatagaagcttcaaaaaaaccTTTTTTACCTTTCGCCCacaaagatacg	[~]	12.541	[~]	12.576	[~]	12.618	[~]	12.625	[~]	12.603	[~]	12.721	[~]	12.774	[~]	12.251	[~]	12.839	[~]	12.352	[~]	12.731	[~]	12.554	[~]	12.62	[~]	12.432	[~]	12.719	[~]	12.715	[~]	12.249	[~]
THC0290_T_0102	1	146977	4	1247	NA	0.634788	NA	0.996668	12	THC0290_0118	NA	Probable lipoprotein precursor	NA	gcccacaaagatacgttttcggaagcgtacacagagttttacaaaaatcaaatattaggtt	[~]	12.419	[~]	12.331	[~]	12.242	[~]	12.345	[~]	12.6	[~]	12.721	[~]	12.774	[~]	12.041	[~]	12.737	[~]	12.352	[~]	12.373	[~]	12.187	[~]	12.58	[~]	12.166	[~]	12.394	[~]	12.525	[~]	12.072	[~]
THC0290_T_0103	1	150755	160	470	SM1	0.790403	SigA	0.90903	24	THC0290_0120	NA	Probable TonB-dependent outer membrane receptor precursor	THC0290_v2_0120	TTTttgcgaatctgttgaattgaTAATAAAAATATTTGTAAATTGGCTttctaaaccaata	[+]	10.996	[+]	10.895	[+]	11.569	[+]	11.658	[+]	12.079	[+]	12.145	[+]	12.312	[+]	10.031	[+]	11.735	[+]	11.932	[+]	11.768	[+]	11.719	[+]	12.719	[+]	12.479	[+]	11.939	[+]	11.788	[+]	13.074	[+]
THC0290_T_0104	1	153377	7	1656	NA	0.887371	NA	0.995668	237;338	THC0290_N_0082;THC0290_0121	NA;NA	new transcription segment;Probable lipoprotein precursor	NA;NA	ctaaacacagaGTGaaagcgtcttttggtaacgaCAAACTATTTAAAAATTTCGGATtcaa	[~]	11.06	[~]	11.166	[~]	11.587	[~]	11.899	[~]	12.161	[~]	11.727	[~]	11.963	[~]	10.554	[~]	11.604	[~]	11.187	[~]	11.839	[~]	11.738	[~]	11.272	[~]	11.642	[~]	11.737	[~]	11.865	[~]	11.676	[~]
THC0290_T_0105	1	153779	4	460	NA	0.97934	NA	0.998667	NA	NA	NA	NA	NA	aaaatggctactgttaGCATCattaagctttgtaGCATGTAATAAAAATGACGACACTAtt	[+]	12.733	[+]	12.488	[+]	12.923	[+]	13.19	[+]	13.311	[+]	13.156	[+]	13.656	[~]	10.491	[+]	12.71	[+]	11.988	[+]	13.202	[+]	12.812	[+]	11.937	[+]	12.14	[+]	12.923	[+]	12.936	[+]	12.872	[+]
THC0290_T_0106	1	154746	4	171	NA	0.862712	NA	0.993669	469	THC0290_N_0083	NA	new transcription segment	NA	cctacagcaaccgctttaggtcaggtttttggaaAAGCAAGACAAACAATTTCGACAgatt	[~]	11.034	[~]	10.999	[~]	11.728	[~]	11.973	[~]	12.35	[~]	12.697	[~]	12.769	[~]	12.013	[~]	11.822	[~]	12.003	[~]	11.949	[~]	11.809	[~]	11.866	[~]	11.331	[~]	12.005	[~]	12.005	[~]	11.544	[~]
THC0290_T_0107	-1	155314	6	1377	SM1	0.946684	SigA	0.954682	1	THC0290_N_0084	NA	new transcription segment	NA	CAgagtgcaaagataattttttAAACTATAAAATCAATAATTTTATTtgtgttttttaatc	[+]	6.677	[+]	6.749	[+]	7.62	[+]	7.497	[+]	7.445	[+]	8.165	[+]	7.085	[+]	9.07	[+]	6.881	[+]	8.149	[+]	7.275	[+]	7.355	[+]	7.724	[+]	5.873	[+]	7.378	[+]	7.242	[+]	6.087	[+]
THC0290_T_0108	-1	155358	3	1378	SM1	0.918361	SigA	0.991669	45	THC0290_N_0084	NA	new transcription segment	NA	TTTattaaatagctatttaggttTATTGAAAATATGTCTATTTTCAGAgtgcaaagataat	[+]	7.346	[+]	7.319	[+]	8.182	[+]	7.977	[+]	7.663	[+]	9.497	[+]	7.892	[+]	9.88	[+]	7.045	[+]	9.373	[+]	8.234	[+]	7.947	[+]	8.917	[+]	5.873	[+]	7.598	[+]	7.479	[+]	6.628	[+]
THC0290_T_0109	1	156039	243	1669	NA	0.565811	NA	0.875375	NA	NA	NA	NA	NA	acacgtgaaggaaatgacttacttcgtgagatgtTAGAGTCAGGAATTATAAAATACGgtg	[~]	14.999	[~]	15.168	[~]	15.154	[+]	15.275	[~]	14.834	[+]	13.949	[+]	14.764	[~]	14.347	[~]	14.451	[+]	13.625	[~]	14.861	[~]	14.731	[~]	12.572	[~]	12.662	[~]	13.757	[~]	13.804	[~]	12.884	[~]
THC0290_T_0110	1	157126	16	1443	NA	0.476508	NA	0.999667	166;230	THC0290_N_0087;THC0290_0124	NA;NA	new transcription segment;Hypothetical transmembrane protein	NA;NA	ccaggagtagatggtagcttcgaaatgttaaataATCACGCACCAATAGTTTCATTActtc	[~]	14.983	[~]	15.061	[~]	14.747	[~]	14.703	[~]	14.178	[+]	14.302	[~]	13.977	[+]	14.413	[~]	13.527	[~]	13.583	[~]	14.494	[~]	14.354	[+]	12.926	[~]	12.324	[~]	13.157	[+]	13.763	[~]	12.101	[+]
THC0290_T_0111	1	157356	25	1449	SM1	0.883372	SigA	0.995668	0	THC0290_0124	NA	Hypothetical transmembrane protein	NA	AAAcagagaaaagccaagcattaTTGTTTGGCTTTTTTTATTTTTGAAaaatgaatttgga	[-]	8.966	[-]	8.821	[-]	8.308	[-]	8.39	[-]	7.904	[-]	7.948	[-]	7.435	[-]	8.39	[-]	7.454	[-]	7.653	[-]	8.472	[-]	8.343	[-]	6.389	[-]	6.193	[-]	5.8	[-]	6.851	[-]	6.926	[-]
THC0290_T_0112	1	160508	4	428	NA	0.770077	NA	0.96901	446;500	THC0290_N_0090;THC0290_0130	NA;NA	new transcription segment;Probable acyl-protein synthetase	NA;NA	tcctataaatactcctttgtttatagttgtgaaatATACTCCATCTACAAATACCGCTaac	[~]	11.683	[~]	11.525	[~]	12.251	[~]	12.679	[~]	12.488	[~]	12.42	[~]	12.156	[~]	13.658	[~]	13.56	[~]	12.667	[~]	11.817	[~]	11.853	[~]	11.937	[~]	12.206	[~]	12.156	[~]	12.564	[~]	11.694	[~]
THC0290_T_0113	-1	163654	23	1688	SM1	0.562812	SigA	1	16	THC0290_0132	pheS	Phenylalanine--tRNA ligase alpha subunit	THC0290_v2_0132	TATTgcctaacggctattgcctaaTGACTAAAAAACACTTAAATTTGCAcctttattacct	[+]	11.711	[+]	11.399	[+]	11.153	[+]	10.89	[+]	10.153	[+]	10.387	[+]	10.153	[+]	8.649	[+]	10.804	[+]	11.295	[+]	10.984	[+]	10.853	[+]	10.535	[~]	10.381	[+]	10.269	[+]	10.033	[~]	10.012	[~]
THC0290_T_0114	-1	164119	3	1621	NA	0.6008	NA	0.999667	-14;395;481	THC0290_0133;THC0290_N_0093;THC0290_0132	NA;NA;pheS	Protein of unknown function;new transcription segment;Phenylalanine--tRNA ligase alpha subunit	NA;NA;THC0290_v2_0132	agaacaggcgaagcaaatctaaaatctaaaattaAAATGTCAAGAGATATACAACTCaaag	[+]	9.979	[+]	9.625	[+]	9.224	[+]	8.864	[~]	7.889	[~]	8.203	[+]	7.55	[+]	6.602	[+]	6.09	[~]	6.906	[+]	9.301	[+]	9.293	[~]	7.891	[+]	8.788	[+]	8.003	[+]	8.296	[~]	9.322	[~]
THC0290_T_0115	-1	164213	19	1549	SM2	0.934355	SigA	1	1;80;489	THC0290_N_0094;THC0290_0133;THC0290_N_0093	NA;NA;NA	new transcription segment;Protein of unknown function;new transcription segment	NA;NA;NA	caaatatatcaaaatTGTttattacaaataCAACTCACTATCTTTACAGCCAAGAaagatt	[+]	9.579	[+]	9.468	[+]	9.008	[~]	8.677	[+]	7.926	[+]	8.288	[+]	7.309	[+]	6.831	[+]	7.716	[+]	8.466	[+]	9.194	[+]	9.152	[+]	9.679	[+]	9.728	[~]	8.113	[~]	8.105	[+]	10.631	[+]
THC0290_T_0116	1	164266	10	968	SM1	0.680107	SigA	0.994335	12	THC0290_0134	NA	Probable transmembrane protein of unknown function	THC0290_v2_0134	TGTAAagatagtgagttgtatttgtAATAAACAATTTTGATATATTTGATaaaaataaatt	[+]	9.117	[+]	8.844	[+]	9.003	[+]	9.038	[+]	8.821	[+]	9.291	[+]	8.551	[+]	7.678	[+]	9.347	[+]	9.52	[+]	9.057	[+]	8.933	[+]	10.064	[+]	10.113	[+]	9.137	[+]	8.549	[+]	10.987	[+]
THC0290_T_0117	-1	166919	3	62	NA	0.932023	NA	0.993002	217	THC0290_N_0097	NA	new transcription segment	NA	gaaccgttttatattgctttagaaaaagccatgcACAATTTCTTGAAAGCAAAATTAcata	[~]	10.832	[~]	10.785	[~]	10.566	[~]	10.341	[~]	9.514	[~]	9.63	[~]	9.392	[~]	9.782	[~]	6.774	[~]	7.001	[~]	10.822	[~]	10.815	[~]	9.19	[-]	7.668	[~]	9.942	[~]	10.159	[~]	9.304	[~]
THC0290_T_0118	-1	172905	7	1757	NA	0.960013	NA	0.998334	148	THC0290_0140	batA	BatA protein	THC0290_v2_0143	ccgacaaaggaataaaaggaataaaaggctacggAACATTTAGCAACAATAAACATAaaat	[-]	10.984	[-]	10.88	[-]	11.244	[-]	10.454	[-]	9.691	[~]	9.823	[-]	9.575	[~]	9.534	[~]	6.881	[~]	7.686	[~]	11.342	[-]	11.23	[~]	10.794	[~]	9.504	[~]	11.017	[~]	11.08	[~]	10.063	[~]
THC0290_T_0119	-1	173729	3	260	NA	0.978674	NA	1	NA	NA	NA	NA	NA	acaattgttagagaaaAAAGAactgcttgccaaaGGCGAAGTCAAAGAATATTATTCGGaa	[~]	11.602	[~]	11.377	[~]	11.093	[~]	10.923	[~]	10.265	[~]	10.054	[~]	10.008	[~]	10.161	[~]	7.741	[~]	7.553	[~]	11.332	[~]	11.214	[~]	10.673	[~]	9.935	[~]	11.03	[~]	10.965	[~]	10.335	[~]
THC0290_T_0120	1	174852	3	246	NA	0.853382	NA	0.864045	NA	NA	NA	NA	NA	ctttgtgcttttcttcgtgaactttgtggttaaactcattattttttttaaccacgaagaa	[~]	10.664	[~]	9.997	[~]	9.688	[~]	10.039	[~]	9.481	[~]	9.345	[~]	10.167	[~]	13.741	[~]	11.389	[~]	11.012	[~]	10.312	[~]	10.117	[~]	11.431	[~]	10.981	[~]	11.247	[~]	10.959	[~]	10.879	[~]
THC0290_T_0121	-1	176127	4	1608	NA	0.533822	NA	0.926691	22	THC0290_N_0101	NA	new transcription segment	NA	tcagggacagtaagcacaagagtcgacgaaagttatgttacaaaattattagggtatttta	[+]	15.473	[+]	15.996	[+]	16.762	[+]	16.127	[+]	15.539	[+]	15.719	[+]	15.287	[+]	15.723	[+]	13.171	[+]	13.21	[+]	16.28	[+]	16.41	[+]	15.328	[+]	13.799	[+]	15.129	[+]	14.959	[+]	14.279	[+]
THC0290_T_0122	-1	176385	6	368	NA	0.985671	NA	0.999667	280	THC0290_N_0101	NA	new transcription segment	NA	atgatttccgattttattacagatcatgattacgAGAAAACATTAAAAATAGCGGGAaaga	[~]	12.637	[~]	12.604	[~]	12.259	[~]	12.021	[~]	10.859	[~]	10.628	[~]	10.488	[~]	10.755	[~]	8.907	[~]	8.567	[~]	12.361	[~]	12.278	[~]	10.72	[~]	10.555	[~]	11.248	[~]	11.333	[~]	10.646	[~]
THC0290_T_0123	-1	178089	58	1586	SM1	0.501833	SigA	0.991336	1;43	THC0290_N_0103;THC0290_0143	NA;NA	new transcription segment;ATPase, MoxR family	NA;THC0290_v2_0146	TTtaaccattttttaacattgtaCTTCTAAAAAAAATTTCAATTTGCAccataataaaata	[+]	13.106	[+]	13.015	[+]	12.674	[+]	12.602	[+]	11.563	[+]	11.223	[+]	10.735	[+]	10.396	[+]	9.698	[+]	9.901	[+]	12.829	[+]	12.801	[+]	12.91	[+]	13.161	[+]	12.056	[+]	11.976	[+]	12.996	[+]
THC0290_T_0124	1	178200	22	1192	SM1	0.856381	SigA	0.994002	NA	NA	NA	NA	NA	AAGAttcaattttaaggatgatttATGATACTATTTGCCTATTTTTAAGaattgaaaaaaa	[+]	8.467	[+]	8.671	[+]	9.561	[+]	9.56	[+]	10.126	[+]	9.875	[+]	9.891	[+]	9.815	[+]	9.196	[+]	9.355	[+]	9.588	[+]	9.725	[+]	9.9	[+]	9.437	[+]	9.069	[+]	9.368	[+]	10.2	[+]
THC0290_T_0125	1	180122	5	1808	SM1	0.943685	SigA	0.999334	24	THC0290_0146	NA	Probable outer membrane protein precursor, OmpA family	NA	TTcgaacgaaaaaggtagaaatTAAAAAGGAACTTATTATATTTGCCaatatttttaaaaa	[+]	12.317	[+]	12.492	[+]	12.327	[+]	12.372	[+]	11.428	[+]	11.809	[+]	10.65	[+]	10.316	[+]	10.506	[+]	10.837	[+]	12.315	[+]	12.385	[+]	10.243	[+]	9.77	[+]	9.981	[+]	10.469	[+]	10.41	[+]
THC0290_T_0126	1	180204	4	1840	NA	0.933356	NA	0.992003	458	THC0290_N_0104	NA	new transcription segment	NA	aatcatgacacttttacttgttctttcggcaagtATCGCAAATGCACAAGCCTACAAAGga	[+]	12.352	[+]	12.441	[~]	12.269	[+]	12.323	[~]	11.332	[+]	11.791	[~]	10.558	[+]	10.349	[~]	10.553	[~]	10.786	[~]	12.245	[~]	12.258	[~]	10.03	[+]	9.555	[~]	9.725	[~]	10.128	[+]	10.248	[~]
THC0290_T_0127	1	181236	4	904	NA	0.832056	NA	0.968677	93	THC0290_N_0106	NA	new transcription segment	NA	taaaaggagcaacttttaccgcaaaacgtggtgcTGCTGTGCATAATATTAAATTGGtttg	[~]	10.696	[~]	10.897	[~]	10.453	[~]	10.892	[~]	10.719	[~]	10.086	[+]	10.559	[+]	7.915	[+]	11.921	[+]	11.132	[~]	10.608	[~]	10.413	[+]	11.151	[+]	13.198	[+]	11.994	[+]	11.292	[+]	14.472	[+]
THC0290_T_0128	-1	182428	43	378	SM1	0.578807	SigA	0.999334	15	THC0290_0148	gpsA	Glycerol-3-phosphate dehydrogenase (NAD(P)+)	THC0290_v2_0151	CTTtacagcaataactttcatctTTATACTATTTTGCTTACTTTTGAAatactaaattttt	[+]	10.797	[+]	10.933	[+]	11.164	[+]	11.027	[+]	10.927	[+]	11.061	[+]	10.884	[+]	8.595	[+]	10.866	[+]	10.768	[+]	11.243	[+]	11.091	[+]	10.938	[+]	11.052	[+]	10.573	[+]	10.496	[+]	11.802	[+]
THC0290_T_0129	1	182564	4	1040	SM6	0.974675	SigECF	0.974675	-1	THC0290_N_0107	NA	new transcription segment	NA	aagtttagtttttttacACAATttaaaaattaatATAACGTTATAATTATGagttagttaa	[~]	3.984	[~]	3.962	[~]	4.072	[~]	3.878	[+]	5.306	[+]	5.944	[+]	5.859	[+]	6.84	[+]	7.672	[+]	9.323	[~]	4.07	[~]	3.906	[+]	10.729	[+]	10.211	[+]	9.677	[+]	8.734	[~]	9.448	[+]
THC0290_T_0130	-1	182786	3	1224	NA	0.456514	NA	0.999667	120;373	THC0290_N_0108;THC0290_0148	NA;gpsA	new transcription segment;Glycerol-3-phosphate dehydrogenase (NAD(P)+)	NA;THC0290_v2_0151	tctttcataaaatgggtatgcaaaccaaactatcCGAATATACAGAAGATTACAAAAaatc	[~]	12.862	[~]	12.885	[~]	12.843	[~]	12.911	[~]	12.454	[~]	12.538	[~]	12.507	[~]	11.924	[~]	11.394	[~]	11.534	[~]	12.866	[~]	12.685	[~]	13.034	[~]	12.525	[~]	12.778	[~]	12.876	[~]	12.32	[~]
THC0290_T_0131	-1	183188	3	1760	NA	0.551816	NA	0.975342	NA	NA	NA	NA	NA	tcatggaacaatatttaacctatccgcatgatgcCATTTTACAAGACCGAATTGCGGaaag	[~]	13.344	[~]	13.066	[~]	13.003	[~]	13.014	[~]	12.743	[~]	12.401	[~]	12.786	[~]	12.031	[~]	11.591	[~]	11.301	[~]	12.822	[~]	12.794	[~]	12.418	[~]	12.463	[~]	12.78	[~]	12.931	[~]	12.232	[~]
THC0290_T_0132	-1	183851	11	1590	SM1	0.937021	SigA	0.945352	18	THC0290_0149	NA	Probable alcohol dehydrogenase	THC0290_v2_0152	AAATTaacatagttttataacacttCCGAAGAAACTTTTATAATTTTAAAttttaaaaata	[+]	13.111	[+]	13.185	[+]	13.194	[+]	13.03	[+]	12.978	[+]	12.721	[+]	12.735	[+]	11.946	[+]	11.563	[+]	11.621	[+]	13.022	[+]	13.188	[+]	13.223	[~]	13.364	[~]	12.839	[+]	13.079	[+]	14.236	[+]
THC0290_T_0133	-1	184502	43	1454	SM1	0.961346	SigA	0.994002	-24;13	THC0290_N_0110;THC0290_0150	NA;nadD	new transcription segment;Nicotinate-nucleotide adenylyltransferase	NA;THC0290_v2_0153	TTttaaattttatatataacttACATCAGATTTTAATTAACTTTACCaacacaaaattagg	[+]	10.564	[+]	10.486	[+]	10.455	[+]	10.216	[+]	10.216	[+]	10.442	[+]	9.92	[+]	9.712	[+]	9.562	[~]	10.007	[+]	10.592	[+]	10.503	[+]	10.305	[+]	10.497	[+]	9.394	[+]	9.175	[+]	11.25	[+]
THC0290_T_0134	-1	184906	54	117	NA	0.992336	NA	0.999667	142;380;417	THC0290_N_0111;THC0290_N_0110;THC0290_0150	NA;NA;nadD	new transcription segment;new transcription segment;Nicotinate-nucleotide adenylyltransferase	NA;NA;THC0290_v2_0153	ggaagcgatggtttaGTAGAtcctacaaaaacaGTTACAGCAACAAACGCTCTAAAAGgaa	[-]	12.992	[-]	12.997	[-]	12.605	[-]	12.684	[-]	12.913	[-]	13.908	[-]	13.058	[~]	14.045	[-]	13.51	[~]	14.375	[-]	12.518	[-]	12.418	[~]	13.225	[~]	11.674	[-]	12.171	[-]	12.471	[~]	12.442	[~]
THC0290_T_0135	-1	187369	12	1479	NA	0.793402	NA	0.988004	NA	NA	NA	NA	NA	gtaacctattcatttgcacaaggcgaaaagatgaatttaggaaatataattttatctaatg	[~]	14.552	[~]	14.647	[~]	14.135	[~]	14.274	[~]	14.474	[+]	14.499	[~]	14.353	[~]	13.491	[~]	14.662	[+]	14.2	[~]	14.112	[~]	14.206	[+]	12.617	[~]	12.237	[~]	12.909	[~]	13.312	[~]	13.895	[~]
THC0290_T_0136	-1	187682	153	1664	SM1	0.892369	SigA	0.999	32	THC0290_0151	NA	Probable TonB-dependent outer membrane receptor precursor	THC0290_v2_0154	ATTaacatttagttaacgtttaaAAAAAAATATTGACTGAACTTTGTAccgaaataattaa	[+]	13.958	[+]	13.812	[+]	13.633	[+]	13.56	[+]	13.685	[+]	14.022	[+]	13.448	[+]	12.718	[+]	13.832	[+]	13.76	[+]	13.585	[+]	13.524	[+]	12.308	[+]	11.78	[+]	12.168	[+]	12.631	[+]	13.316	[+]
THC0290_T_0137	-1	189508	8	1710	SM1	0.937354	SigA	0.999	34	THC0290_0152	pgi	Glucose-6-phosphate isomerase	THC0290_v2_0155	TTAttttttttcttataccaaagTTTGACTTAAATTCGTAAATTCGTAacttatttttttt	[+]	11.21	[+]	11.284	[+]	11.498	[+]	11.358	[+]	11.029	[+]	11.361	[+]	10.921	[+]	10.227	[+]	9.921	[+]	10.357	[+]	11.328	[+]	11.724	[+]	9.768	[+]	8.816	[+]	10.039	[+]	10.115	[+]	9.189	[+]
THC0290_T_0138	-1	190256	46	1611	NA	0.713762	NA	0.996335	29	THC0290_0153	rplY	50S ribosomal protein L25	THC0290_v2_0156	tcaaatctcttacagctaaaaaggctattgccaaAAGCTTATTGACAAATAAATTATttat	[+]	14.306	[+]	14.418	[+]	13.973	[+]	13.977	[+]	13.982	[+]	13.909	[+]	14.106	[~]	13.036	[~]	14.104	[~]	13.911	[+]	14.141	[+]	14.127	[+]	12.708	[+]	12.56	[+]	13.302	[+]	13.619	[~]	12.525	[~]
THC0290_T_0139	-1	191301	478	1221	SM1	0.49017	SigA	1	1;45	THC0290_N_0115;THC0290_0154	NA;prsA	new transcription segment;Ribose-phosphate diphosphokinase	NA;THC0290_v2_0157	ttacttaaaaattttcttttttacttcgaTTTAATTCCTAAATTTGCAactcggtaaaacg	[+]	13.11	[+]	13.263	[+]	13.347	[+]	13.343	[+]	13.542	[+]	13.865	[+]	13.794	[+]	12.876	[+]	13.654	[+]	13.912	[+]	13.365	[+]	13.123	[+]	12.946	[+]	12.235	[+]	13.049	[+]	13.114	[+]	12.567	[+]
THC0290_T_0140	1	191391	353	999	SM1	0.928024	SigA	1	-5;41;124	THC0290_N_0116;THC0290_tRNA_0003;THC0290_N_0117	NA;NA;NA	new transcription segment;transfer RNA-Leu;new transcription segment	NA;NA;NA	TTTttaagtaattttttatgaatTGCAAAAAAAATATTTACATTTGCActcacggaattaa	[+]	11.603	[+]	10.762	[+]	12.588	[+]	12.915	[+]	13.209	[+]	14.263	[+]	13.706	[+]	15.444	[+]	14.623	[+]	15.69	[+]	12.92	[+]	12.435	[+]	15.995	[+]	15.587	[+]	15.235	[+]	13.842	[+]	16.097	[+]
THC0290_T_0141	1	191432	12747	1000	SM1	0.918694	SigA	0.966011	-46;0;83	THC0290_N_0116;THC0290_tRNA_0003;THC0290_N_0117	NA;NA;NA	new transcription segment;transfer RNA-Leu;new transcription segment	NA;NA;NA	atttgcactcacggaaTTAAAATTTATGTTTTAATTTTGACtgctaataagcccggatggc	[+]	10.309	[+]	9.741	[+]	10.754	[+]	11.355	[+]	11.458	[+]	12.706	[+]	12.141	[+]	14.173	[+]	13.213	[+]	13.822	[+]	11.246	[+]	10.783	[+]	14.278	[+]	13.918	[+]	13.423	[+]	12.063	[+]	15.166	[+]
THC0290_T_0142	-1	191888	6309	1069	SM1	0.894369	SigA	0.997667	-45;0;85;127	THC0290_N_0120;THC0290_tRNA_0004;THC0290_N_0119;THC0290_N_0118	NA;NA;NA;NA	new transcription segment;transfer RNA-Leu;new transcription segment;new transcription segment	NA;NA;NA;NA	ttcataatctataaTTCAAAAATATGTTTTATATTTGCActcaggatttcgcggatatggt	[+]	7.994	[+]	7.909	[+]	8.223	[+]	8.293	[+]	9.101	[+]	11.42	[+]	10.337	[+]	12.315	[+]	11.939	[+]	13.389	[+]	8.089	[+]	8.331	[+]	12.886	[+]	11.803	[+]	10.926	[+]	10.722	[+]	12.629	[+]
THC0290_T_0143	1	191970	24	1627	SM3	0.708097	SigA	0.996668	1;51	THC0290_N_0121;THC0290_0155	NA;NA	new transcription segment;ArgE/DapE/Acy1 family protein	NA;THC0290_v2_0158	ttgaattatagattATGaattatgatttTTTTTATTGTATTTTTGAatttgaaaacgagtt	[+]	11.197	[+]	11.226	[+]	11.253	[+]	11.296	[+]	10.886	[+]	11.366	[+]	10.605	[+]	10.241	[+]	10.517	[+]	10.69	[+]	11.349	[+]	11.404	[+]	10.557	[~]	10.348	[+]	10.245	[+]	10.437	[+]	10.887	[+]
THC0290_T_0144	1	194623	3	1137	SM1	0.913695	SigA	0.914362	27	THC0290_0157	NA	Probable transmembrane protein of unknown function	NA	AATATAttcattcaattaaaacaataTCAAAAAATTGGCGTTAAATTTGTAtatcatcaat	[+]	8.337	[+]	8.063	[+]	8.096	[+]	8.413	[+]	8.789	[+]	9.472	[+]	9.351	[+]	9.774	[+]	10.504	[+]	10.999	[+]	8.278	[+]	8.106	[+]	12.158	[+]	12.058	[+]	10.724	[+]	10.491	[+]	12.939	[+]
THC0290_T_0145	1	194634	3	1138	SM4	0.901033	Sig54	0.901033	16	THC0290_0157	NA	Probable transmembrane protein of unknown function	NA	TCAAttaaaacaatatcaaaaaaTTGGCGTTAAATTTGTATATcatcaatcaaatcaaaat	[+]	8.337	[+]	8.063	[+]	8.096	[+]	8.413	[+]	8.789	[+]	9.472	[+]	9.351	[+]	9.774	[+]	10.504	[+]	10.999	[+]	8.278	[+]	8.106	[+]	12.158	[+]	12.058	[+]	10.724	[+]	10.491	[+]	12.939	[+]
THC0290_T_0146	1	196131	7	1258	SM1	0.985671	SigA	1	40	THC0290_0158	pepP	Xaa-Pro aminopeptidase	THC0290_v2_0161	TAAcggcatttgtctacaataaaAATCATATTATTCCTTAATTTTGATttcaaattaacta	[+]	12.77	[+]	12.778	[+]	13.258	[+]	13.183	[+]	13.061	[+]	12.879	[+]	12.604	[+]	12.412	[+]	12.795	[+]	12.288	[+]	13.05	[+]	13.155	[+]	11.696	[+]	11.824	[+]	11.891	[+]	12.075	[+]	12.143	[+]
THC0290_T_0147	1	197271	5	417	NA	0.613462	NA	0.994668	302	THC0290_0159	NA	Probable hydrolase	THC0290_v2_0162	aaatattttatgcacGgaacatcgcaccacatgGGGTTAGACACCCACGATTACGGATtgt	[-]	11.091	[-]	10.95	[-]	11.987	[-]	12.029	[-]	11.685	[-]	11.677	[-]	11.748	[-]	12.274	[-]	12.102	[-]	11.622	[-]	12.001	[-]	11.718	[-]	10.838	[-]	10.555	[-]	10.979	[-]	11.13	[-]	10.33	[-]
THC0290_T_0148	1	197575	5	1819	SM2	0.867044	SigA	1	-2	THC0290_0159	NA	Probable hydrolase	THC0290_v2_0162	tgctcaaaaaaataaTTCGtaaattattcaTTAAAGCCTACTTTTGCAATGATGAataatt	[~]	8.65	[~]	8.7	[~]	8.417	[~]	8.337	[~]	8.134	[~]	8.191	[~]	8.178	[~]	8.717	[~]	9.377	[~]	9.409	[~]	8.333	[~]	8.235	[-]	7.716	[-]	7.059	[~]	7.599	[~]	7.57	[-]	5.239	[-]
THC0290_T_0149	-1	202619	5565	1415	SM1	0.876041	SigA	0.999334	30	THC0290_0161	NA	Outer membrane protein precursor, OmpA family P60	THC0290_v2_0164	TTTttaacaattcattttgtaatTAACAATATCCTAGTTACTTTTGTCacaataacgtaat	[+]	14.706	[+]	14.71	[+]	15.021	[+]	15.273	[+]	15.408	[+]	15.6	[+]	15.293	[+]	14.979	[+]	15.286	[+]	14.687	[+]	14.876	[+]	14.998	[+]	13.757	[+]	13.405	[+]	14.101	[+]	14.274	[+]	14.245	[+]
THC0290_T_0150	-1	203951	33	1792	SM1	0.849384	SigA	0.997334	2;62	THC0290_N_0127;THC0290_0162	NA;kbl	new transcription segment;Glycine C-acetyltransferase	NA;THC0290_v2_0165	gAAAAAAtcactcatatatataggagAGAATTTAGAAATAGTACATTTGTAaaaaattgtc	[+]	12.723	[+]	12.645	[+]	12.754	[+]	12.401	[+]	12.269	[+]	12.473	[+]	12.065	[+]	10.616	[+]	11.954	[+]	12.312	[+]	12.823	[+]	12.618	[+]	11.442	[+]	11.092	[+]	10.938	[+]	11.236	[+]	11.647	[+]
THC0290_T_0151	1	206458	3	526	SM3	0.759747	SigA	0.998334	NA	NA	NA	NA	NA	ttgatgttttggtttTCtaacgatttgcaAGTTTCTTCTAATTTTGCtttaagggcaataa	[~]	4.621	[~]	4.928	[~]	4.17	[~]	5.09	[~]	4.473	[~]	5.11	[~]	4.676	[-]	6.632	[-]	3.924	[~]	4.858	[~]	4.72	[~]	4.674	[~]	4.563	[~]	3.945	[~]	4.863	[~]	3.931	[-]	4.088	[+]
THC0290_T_0152	1	207342	34	929	SM1	0.98134	SigA	1	32	THC0290_0164	sodA	Superoxide dismutase [Mn]	THC0290_v2_0167	ATAagggtttgaaattttaattCCAAAGTTAATTGATTAATTTTGAAtttaattatataat	[+]	11.479	[+]	11.596	[+]	12.087	[+]	12.097	[+]	12.328	[+]	12.348	[+]	12.115	[+]	11.252	[+]	12.649	[+]	12.952	[+]	12.219	[+]	12.391	[+]	13.113	[+]	12.774	[+]	12.372	[+]	12.564	[+]	13.397	[+]
THC0290_T_0153	-1	208113	32	1170	NA	0.723092	NA	0.970676	-21	THC0290_N_0129	NA	new transcription segment	NA	aagaacacgaacctcttacttttacataaccattacATAAGTAGGTTAAGTTATGGTAGat	[-]	3.899	[-]	4.259	[-]	3.939	[-]	4.267	[-]	3.868	[-]	4.301	[-]	3.86	[-]	4.631	[-]	4.114	[-]	4.366	[-]	3.874	[-]	3.906	[~]	7.631	[+]	7.573	[~]	5.642	[-]	4.458	[-]	4.039	[+]
THC0290_T_0154	-1	208135	7237	529	SM2	0.652782	SigA	0.998001	1	THC0290_N_0129	NA	new transcription segment	NA	tttcatcgatttaatTTTaaataagaacacGAACCTCTTACTTTTACATAACCATtacata	[-]	4.066	[~]	4.464	[~]	4.367	[~]	4.517	[~]	5.212	[~]	5.816	[+]	6.622	[~]	5.762	[~]	5.538	[~]	6.564	[~]	4.31	[~]	4.077	[+]	8.57	[+]	8.843	[+]	7.971	[~]	6.247	[+]	8.341	[+]
THC0290_T_0155	-1	208742	3	1418	NA	0.935688	NA	1	106	THC0290_N_0131	NA	new transcription segment	NA	ggagaagcaagaagaGCACTttcggctaattcaATAGCTGTAAACAAAGAAAAAGTAAccg	[~]	11.157	[~]	11.054	[~]	10.5	[~]	10.6	[~]	10.505	[~]	10.547	[~]	10.441	[~]	8.632	[~]	10.306	[~]	10.354	[~]	10.676	[~]	10.639	[~]	9.233	[~]	8.875	[~]	9.257	[~]	9.569	[~]	9.418	[~]
THC0290_T_0156	-1	209947	24	1850	SM2	0.654449	SigA	0.994668	15	THC0290_0165	tyrS	Tyrosine--tRNA ligase	THC0290_v2_0169	gccattgatttttgaaATTGatttttgttatTGAATTGTTATCTTTGTCGAAATTAatttt	[+]	11.912	[+]	11.821	[+]	11.257	[+]	11.354	[+]	11.098	[+]	11.154	[+]	11.006	[+]	8.927	[+]	11.323	[+]	11.116	[+]	11.43	[+]	11.299	[+]	10.091	[+]	10.05	[+]	10.131	[+]	10.27	[+]	10.883	[+]
THC0290_T_0157	1	210086	63	1158	SM1	0.601466	SigA	0.999667	0	THC0290_0166	NA	Protein of unknown function	THC0290_v2_0170	ATTggtcaaaaaaatggtaattcGTAATTTGTAATTTGTAATTTTACaaaatggtattagt	[+]	8.697	[+]	8.862	[+]	8.754	[+]	9.077	[+]	9.502	[+]	9.008	[+]	9.483	[+]	9.592	[+]	10.35	[+]	10.102	[+]	8.808	[+]	8.893	[+]	10.157	[+]	11.199	[+]	10.225	[+]	9.662	[+]	12.004	[+]
THC0290_T_0158	-1	213603	11	1581	SM1	0.511163	SigA	1	13	THC0290_0169	NA	Glycosyl transferase, group 2 family protein	THC0290_v2_0173	TTTataaataatttaagaaactcATTTGCGAAAAAGCTTATTTTTGCAtcagaattttacc	[+]	11.839	[+]	11.78	[+]	11.173	[+]	11.168	[+]	10.52	[+]	10.538	[+]	10.43	[+]	9.806	[+]	9.838	[+]	10.306	[+]	11.137	[+]	11.048	[+]	11.222	[+]	10.531	[+]	9.828	[+]	9.652	[+]	11.171	[+]
THC0290_T_0159	-1	235148	15	83	SM1	0.903366	SigA	0.969677	26	THC0290_0186	NA	Probable cell surface protein (Leucine-rich repeat protein) precursor	NA	aatcttatttgcatttaCTTTAATTAATATTTTAAATTTGTAttatttataattagtctaa	[+]	12.688	[+]	12.341	[+]	13.061	[+]	13.114	[+]	14.869	[+]	14.776	[+]	15.74	[+]	14.908	[+]	15.444	[+]	15.452	[+]	14.124	[+]	14.327	[+]	14.514	[+]	14.044	[+]	14.347	[+]	14.944	[+]	13.099	[+]
THC0290_T_0160	1	235708	139	984	SM1	0.985671	SigA	1	0	THC0290_0187	NA	Probable transmembrane protein of unknown function	NA	TTTaacttgcggttttgggtaatAGTTTTAAAAAATTGTAAATTTGCAttatgcgtaaaac	[+]	8.611	[+]	8.547	[+]	8.35	[+]	8.311	[+]	8.545	[+]	9.792	[+]	9.47	[+]	10.772	[+]	10.183	[+]	10.976	[+]	8.338	[+]	8.295	[+]	11.913	[+]	10.804	[+]	10.331	[+]	10.191	[+]	11.183	[+]
THC0290_T_0161	1	236322	44	1830	SM3	0.669777	SigA	0.998334	72	THC0290_0188	NA	Protein of unknown function	THC0290_v2_0196	caaaaattattattaaGTaagttgttttattTTATTTTATATATTTGCgcactcgaaatcg	[+]	12.046	[+]	12.233	[+]	10.94	[+]	10.7	[+]	10.174	[+]	10.041	[+]	10.516	[~]	10.476	[+]	11.399	[~]	11.069	[+]	10.958	[+]	10.931	[+]	10.548	[+]	10.652	[+]	10.762	[~]	10.831	[+]	10.255	[+]
THC0290_T_0162	-1	240796	9	943	SM1	0.603799	SigA	0.994668	226	THC0290_0191	NA	Probable bifunctional protein : transcriptional regulator NadR family and of unknown function	THC0290_v2_0199	AATAgggcttattatttttgttttAACGCTCATTTTTGTTATTATTGTGtatatttatttt	[+]	9.675	[~]	9.572	[+]	9.37	[+]	9.324	[+]	9.39	[+]	9.433	[+]	9.323	[+]	9.891	[+]	9.536	[+]	9.617	[+]	9.569	[+]	9.555	[+]	11.128	[+]	10.596	[+]	9.628	[+]	9.559	[+]	10.856	[+]
THC0290_T_0163	1	242732	58	856	SM1	0.989337	SigA	1	31	THC0290_0195	ahcY	Adenosylhomocysteinase	THC0290_v2_0203	ATAAATattcctgaaattcgttttttTATAAACTTATTACGTAAATTTGCAaaaattttat	[+]	13.206	[+]	13.103	[+]	12.604	[+]	12.859	[+]	13.177	[+]	13.484	[+]	13.571	[+]	12.162	[+]	14.219	[+]	14.815	[+]	12.588	[+]	12.493	[+]	15.555	[+]	15.063	[+]	14.452	[+]	14.423	[+]	15.269	[+]
THC0290_T_0164	1	243747	12	1684	NA	0.457514	NA	1	333	THC0290_N_0147	NA	new transcription segment	NA	ttgatatggcttggttgaacaaaaaccacggtgcATCAAAAATCGAAATTAAACCACaagt	[~]	13.022	[~]	12.897	[~]	12.334	[~]	12.734	[~]	13.024	[~]	12.919	[~]	13.78	[~]	12.495	[~]	14.124	[~]	13.819	[~]	12.479	[~]	12.19	[~]	14.31	[~]	14.376	[~]	14.309	[~]	14.282	[~]	13.27	[~]
THC0290_T_0165	1	244015	8	1339	NA	0.981006	NA	0.998667	65	THC0290_N_0147	NA	new transcription segment	NA	tttcttgcaccttgcaaaattaggtgtcgaattgGAAGTTTTACGTGACGACCAAGCAGct	[-]	7.988	[-]	8.069	[-]	7.915	[-]	8.063	[-]	8.567	[-]	8.734	[-]	10.114	[-]	11.103	[-]	11.916	[-]	11.589	[-]	7.981	[-]	8.391	[-]	11.183	[-]	11.242	[-]	10.838	[-]	10.665	[-]	10.308	[-]
THC0290_T_0166	1	244928	155	1183	SM1	0.64012	SigA	0.999334	13	THC0290_0197	ltd	L-threonine 3-dehydrogenase	THC0290_v2_0205	AGTgttaaagatgttaacgctatATTTTACGAAAACATTATATTTGTActtcaagaaacaa	[+]	11.446	[+]	11.776	[+]	11.711	[+]	11.726	[+]	11.684	[+]	11.75	[+]	11.287	[+]	10.123	[+]	11.458	[+]	11.56	[+]	11.671	[+]	11.843	[+]	11.581	[+]	11.475	[+]	11.035	[+]	11.157	[+]	12.134	[+]
THC0290_T_0167	1	245714	59	1236	NA	0.807064	NA	0.997001	178;251	THC0290_N_0150;THC0290_N_0151	NA;NA	new transcription segment;new transcription segment	NA;NA	ttgtcggccatgagttttACACCtgccgaaattgccGAAGAAATTAAAAAACACTTTCCTG	[~]	11.694	[~]	11.642	[+]	12.008	[+]	12.08	[+]	12.269	[+]	12.346	[+]	12.361	[+]	11.868	[+]	12.262	[+]	12.109	[~]	12.058	[~]	11.853	[+]	11.565	[+]	11.481	[+]	11.662	[~]	11.6	[~]	11.245	[+]
THC0290_T_0168	-1	247211	6	705	NA	0.784738	NA	0.982672	NA	NA	NA	NA	NA	aggaagttgctggcatgattcagcgattggttccTGATGCCAAAGTAGGAATTGGTCacgg	[~]	10.237	[~]	10.126	[~]	9.83	[~]	9.928	[~]	10.047	[~]	9.829	[~]	10.549	[+]	10.444	[~]	10.721	[~]	10.217	[~]	10.004	[~]	9.869	[~]	9.487	[-]	9.096	[~]	9.438	[~]	9.667	[-]	9.073	[~]
THC0290_T_0169	-1	247757	7	730	SM2	0.928357	SigA	0.973342	NA	NA	NA	NA	NA	ctgcatttaaagcaGTTGacaacggaaaaCAAGTCGCTATTTTAGTTCCAACTAcaatttt	[~]	10.877	[~]	10.665	[~]	10.52	[~]	10.417	[~]	10.54	[~]	10.59	[~]	10.874	[~]	8.096	[~]	10.637	[~]	10.505	[~]	10.746	[~]	10.643	[~]	9.458	[~]	9.209	[~]	9.849	[~]	10.062	[~]	9.349	[~]
THC0290_T_0170	1	249704	134	614	SM3	0.606798	SigA	0.999334	17;443;470	THC0290_0199;THC0290_N_0152;THC0290_N_0153	NA;NA;NA	Probable transmembrane protein of unknown function;new transcription segment;new transcription segment	THC0290_v2_0207;NA;NA	gtatcgtgtaagtttTaaatttgtcctgtTTTTTTGTTTATATTTGCgttgaactaaaaaa	[+]	11.354	[+]	11.344	[+]	11.387	[+]	11.488	[+]	12.015	[+]	11.996	[+]	12.06	[+]	12.803	[+]	12.757	[+]	12.429	[+]	11.357	[+]	11.302	[+]	12.391	[+]	12.288	[+]	12.082	[+]	12.073	[+]	12.811	[+]
THC0290_T_0171	1	250351	4	211	NA	0.385871	NA	0.791736	402	THC0290_N_0154	NA	new transcription segment	NA	ttaagaaattcgacaagcaatctttttctataagcCTCGTTAAGGATACCGTAAGGGTCga	[~]	10.964	[~]	11.261	[~]	11.467	[~]	11.544	[~]	12.21	[~]	11.948	[~]	12.21	[~]	12.867	[~]	13.801	[~]	12.999	[~]	11.169	[~]	11.445	[~]	11.518	[~]	11.874	[~]	11.73	[~]	11.857	[~]	11.637	[-]
THC0290_T_0172	-1	251129	7	137	SM1	0.971676	SigA	0.999667	NA	NA	NA	NA	NA	AAATagaacgtaaatttttagtttCAAATAATGATTTCATAGCTTTGGCtgttgccaaaaa	[~]	8.92	[~]	9.074	[~]	9.048	[~]	9.345	[~]	10.17	[-]	10.176	[~]	10.435	[~]	10.266	[~]	11.256	[-]	10.945	[~]	8.952	[~]	9.115	[-]	11.686	[~]	11.605	[~]	11.32	[~]	11.08	[~]	12.069	[-]
THC0290_T_0173	-1	251475	4	554	NA	0.987004	NA	0.990337	-12;174;289	THC0290_N_0156;THC0290_N_0155;THC0290_0201	NA;NA;NA	new transcription segment;new transcription segment;Adenylate cyclase family protein	NA;NA;THC0290_v2_0209	atttgataacaaataaAAAAccagatactttagcCTAGCCATTACACATGTAGGTTAAGtt	[-]	6.492	[-]	6.808	[-]	6.082	[-]	5.637	[-]	6.016	[-]	6.02	[-]	6.792	[-]	5.106	[-]	5.351	[-]	5.9	[-]	5.762	[-]	5.958	[~]	7.785	[-]	4.234	[-]	6.249	[-]	6.43	[-]	4.2	[-]
THC0290_T_0174	-1	251488	296	1570	SM2	0.593469	SigA	0.994335	1;187;302	THC0290_N_0156;THC0290_N_0155;THC0290_0201	NA;NA;NA	new transcription segment;new transcription segment;Adenylate cyclase family protein	NA;NA;THC0290_v2_0209	attcaacggtttaaTTTGataacaaataaaAAACCAGATACTTTAGCCTAGCCATtacaca	[-]	6.492	[-]	6.808	[-]	6.082	[-]	5.637	[-]	6.016	[-]	6.136	[-]	6.792	[-]	5.106	[-]	5.837	[-]	6.471	[-]	5.762	[-]	6.003	[~]	7.785	[-]	4.234	[-]	6.249	[-]	6.43	[-]	5.247	[-]
THC0290_T_0175	-1	252913	3	319	NA	0.886704	NA	0.999334	NA	NA	NA	NA	NA	acaacatccaaaggaaatggcagataccgttaccGTAATGGAAAAAATAGGCCATTTTTta	[~]	12.147	[~]	12.327	[~]	11.509	[~]	11.404	[~]	11.592	[~]	11.591	[~]	12.3	[~]	11.035	[~]	12.151	[~]	11.781	[~]	11.371	[~]	10.952	[~]	9.592	[~]	9.543	[~]	10.126	[~]	10.509	[~]	9.909	[~]
THC0290_T_0176	-1	253400	5	1736	NA	0.920027	NA	0.999667	NA	NA	NA	NA	NA	gcggaatagcttttttaagattattaaaaccgctAGAATTTTATAAAGAAAAATACGgaac	[~]	11.499	[-]	11.553	[-]	10.786	[-]	10.638	[~]	10.755	[~]	11.28	[~]	11.555	[-]	10.475	[-]	11.557	[-]	11.563	[-]	10.506	[-]	10.105	[-]	10.058	[-]	9.841	[-]	9.895	[-]	10.076	[-]	8.697	[-]
THC0290_T_0177	-1	254488	898	1578	SM2	0.973342	SigA	1	20	THC0290_0203	NA	Carbohydrate kinase, PfkB family	THC0290_v2_0211	tacaactttcaaccGTTGtaactttgtaacTTAAAAACTATCTTTGCACTATAATtttgaa	[+]	12.413	[+]	12.346	[+]	11.576	[+]	11.529	[+]	11.583	[+]	11.851	[+]	11.8	[+]	12.449	[+]	12.148	[+]	12.52	[+]	11.706	[+]	11.587	[+]	12.249	[+]	12.015	[+]	11.655	[+]	11.638	[+]	12.513	[+]
THC0290_T_0178	-1	255021	3	1222	NA	0.904698	NA	0.999667	-3;477	THC0290_0204;THC0290_N_0159	rnhA;NA	Ribonuclease HI;new transcription segment	THC0290_v2_0212;NA	atgttttcccaaagaaATAGAaaaattactaataCCAAAAACCTAAATTGAATTACCAAgt	[~]	10.035	[~]	10.058	[~]	9.052	[~]	9.001	[~]	7.964	[~]	7.891	[~]	7.288	[~]	6.634	[-]	6.108	[~]	6.202	[~]	9.357	[~]	9.173	[-]	6.067	[~]	6.06	[~]	6.543	[~]	6.765	[-]	6.31	[~]
THC0290_T_0179	1	255395	4	40	SM1	0.447517	SigA	0.824725	13;299;375	THC0290_N_0160;THC0290_N_0161;THC0290_0206	NA;NA;acpP	new transcription segment;new transcription segment;Acyl carrier protein	NA;NA;THC0290_v2_0214	aaaaaacctgctaaaacaattaaatcgggtTTTATTTTGTTTATTTTGTttaaaattgcgc	[+]	6.506	[+]	6.614	[+]	6.968	[+]	6.984	[+]	6.949	[+]	6.821	[+]	7.167	[+]	7.117	[~]	7.167	[+]	6.767	[+]	6.936	[+]	6.7	[+]	5.712	[~]	6.975	[+]	6.783	[+]	6.661	[-]	8.123	[~]
THC0290_T_0180	1	255407	7	41	SM3	0.888371	SigA	0.993669	1;287;363	THC0290_N_0160;THC0290_N_0161;THC0290_0206	NA;NA;acpP	new transcription segment;new transcription segment;Acyl carrier protein	NA;NA;THC0290_v2_0214	aaaacaattaaatcGGGttttattttgtttATTTTGTTTAAAATTGCgccgtcagaaagtt	[+]	6.562	[+]	6.575	[+]	6.968	[+]	6.769	[+]	6.949	[+]	6.766	[+]	7.149	[+]	7.117	[~]	6.598	[+]	6.767	[+]	6.936	[+]	6.738	[+]	5.712	[~]	6.959	[~]	6.306	[+]	6.626	[-]	7.688	[~]
THC0290_T_0181	-1	255613	7	1634	SM1	0.804732	SigA	0.998001	18	THC0290_0205	purN	Phosphoribosylglycinamide formyltransferase	THC0290_v2_0213	AAGagccattatttttatttattATCATTTATTATTCTTTTTTTTGCGaaatataaataac	[+]	9.727	[+]	9.849	[+]	9.09	[+]	8.851	[+]	7.983	[+]	8.066	[+]	7.372	[+]	6.733	[+]	7.491	[+]	7.084	[+]	9.231	[+]	9.08	[+]	7.255	[~]	7.279	[~]	6.225	[+]	6.764	[+]	7.347	[+]
THC0290_T_0182	1	255692	343	1779	SM1	0.790403	SigA	0.999667	2;78;315;355	THC0290_N_0161;THC0290_0206;THC0290_N_0162;THC0290_N_0163	NA;acpP;NA;NA	new transcription segment;Acyl carrier protein;new transcription segment;new transcription segment	NA;THC0290_v2_0214;NA;NA	ATAaataaaaataatggctctttGTGAAAATATTTTTTTAAATTCGTTgtcagatttatta	[+]	14.414	[+]	14.495	[+]	14.632	[+]	14.5	[+]	14.472	[+]	15.473	[+]	13.685	[+]	14.808	[+]	13.575	[+]	14.471	[+]	14.589	[+]	14.994	[+]	13.572	[+]	12.64	[+]	12.57	[+]	13.218	[+]	12.906	[+]
THC0290_T_0183	1	255693	994	1778	SM1	0.757747	SigA	0.997334	1;77;314;354	THC0290_N_0161;THC0290_0206;THC0290_N_0162;THC0290_N_0163	NA;acpP;NA;NA	new transcription segment;Acyl carrier protein;new transcription segment;new transcription segment	NA;THC0290_v2_0214;NA;NA	TAaataaaaataatggctctttGTGAAAATATTTTTTTAAATTCGTTgtcagatttattaa	[+]	14.414	[+]	14.495	[+]	14.632	[+]	14.5	[+]	14.472	[+]	15.473	[+]	13.685	[+]	14.808	[+]	13.575	[+]	14.471	[+]	14.589	[+]	14.994	[+]	13.572	[+]	12.64	[+]	12.57	[+]	13.218	[+]	12.906	[+]
THC0290_T_0184	1	255746	741	1780	SM1	0.897701	SigA	1	24;261;301	THC0290_0206;THC0290_N_0162;THC0290_N_0163	acpP;NA;NA	Acyl carrier protein;new transcription segment;new transcription segment	THC0290_v2_0214;NA;NA	TTtattaactaaaatgtggtttTAAGATAAAGTTTTTTATTTTTGCCatcaattaaaattt	[+]	14.357	[+]	14.477	[+]	14.599	[+]	14.474	[+]	14.456	[+]	15.434	[+]	13.585	[+]	14.754	[+]	13.527	[+]	14.459	[+]	14.577	[+]	14.84	[+]	13.511	[+]	12.62	[+]	12.528	[+]	13.213	[+]	12.871	[+]
THC0290_T_0185	1	257123	30	1797	NA	0.457847	NA	0.997001	495	THC0290_0208	rnc	Ribonuclease III	THC0290_v2_0217	gccttagttcttgaagaatatgaacatgcaattgCTCGTGGCGCAAAGATATATTGTgaag	[+]	15.002	[+]	14.97	[+]	15.279	[+]	15.535	[+]	15.213	[+]	14.371	[+]	14.88	[~]	12.431	[+]	14.247	[+]	13.415	[+]	15.004	[+]	15.38	[+]	12.39	[+]	12.88	[+]	13.604	[+]	13.771	[+]	12.968	[+]
THC0290_T_0186	1	257462	56	73	NA	0.831056	NA	0.994335	156	THC0290_0208	rnc	Ribonuclease III	THC0290_v2_0217	gcgattgcttcggtattgtctatcaaacacggtaTTGTTCCTCCCACAATAAACCACacaa	[-]	12.377	[~]	12.482	[-]	12.173	[-]	12.326	[-]	11.792	[~]	12.509	[-]	11.51	[+]	12.152	[-]	11.324	[~]	11.868	[-]	12.444	[-]	12.119	[~]	11.063	[-]	10.054	[-]	10.677	[-]	10.776	[~]	10.54	[~]
THC0290_T_0187	1	258453	13	531	SM2	0.955015	SigA	0.999667	17;500	THC0290_0209;THC0290_0210	NA;pykA	Protein of unknown function;Pyruvate kinase	NA;THC0290_v2_0219	acctaattttgttaaCTGTttttaaccaatAGAAACGCTATCTTTACACCTAATTtttttg	[~]	10.433	[~]	10.281	[~]	9.708	[~]	9.638	[~]	9.784	[~]	9.627	[+]	9.848	[+]	10.746	[+]	10.148	[+]	10.329	[~]	10.018	[~]	9.949	[+]	11.361	[+]	11.356	[+]	10.679	[+]	10.668	[+]	10.58	[+]
THC0290_T_0188	-1	261288	3	1845	SM2	0.372542	SigA	0.636788	-37;38	THC0290_N_0167;THC0290_0211	NA;NA	new transcription segment;Protein of unknown function	NA;NA	aaacgaaatttaataattaaaaAAAGGAATTACTTTTGTTATTctaatttagaataaccaa	[+]	12.323	[+]	12.374	[+]	12.088	[+]	12.015	[+]	11.292	[+]	11.408	[+]	10.668	[+]	10.658	[+]	10.506	[+]	11.206	[+]	12.151	[+]	12.307	[+]	11.249	[+]	11.366	[+]	10.545	[+]	10.598	[+]	11.907	[+]
THC0290_T_0189	-1	264279	30	436	SM1	0.809397	SigA	0.978341	1;68	THC0290_N_0168;THC0290_0215	NA;ruvC	new transcription segment;Crossover junction endoribonuclease	NA;THC0290_v2_0224	CAACaatcgaaagtttgatggcaaGTATAAGGAATTGTTTAGCTTTGTGagaaattgaaat	[+]	10.277	[+]	10.37	[+]	10.244	[+]	9.977	[+]	9.707	[+]	9.864	[+]	9.563	[+]	8.224	[+]	10.35	[+]	10.636	[+]	10.228	[+]	10.301	[+]	11.002	[+]	10.937	[+]	9.996	[+]	9.541	[+]	11.442	[+]
THC0290_T_0190	1	266571	15	826	SM2	0.638787	SigA	0.998667	1;369	THC0290_N_0169;THC0290_0219	NA;NA	new transcription segment;Hypothetical protein	NA;THC0290_v2_0228	tacgtgctgttgtatTTTGtaagattgggtTCGAATTGTATTTTTGCATTGGCAAaaacgg	[~]	8.619	[~]	8.519	[~]	7.927	[~]	8.285	[~]	7.93	[+]	9.155	[~]	7.943	[+]	8.117	[~]	9.943	[+]	10.753	[~]	8.163	[~]	8.052	[+]	11.043	[~]	10.424	[~]	9.488	[~]	9.174	[~]	11.293	[+]
THC0290_T_0191	1	269480	3	524	SM3	0.812729	SigA	0.948684	364	THC0290_0223	ileS	Isoleucine--tRNA ligase	THC0290_v2_0232	aacaaaatgctagtTGGgtttttcctgtttACTTTTGTTATATTTCCatcattatcggcag	[~]	5.092	[~]	4.781	[~]	5.21	[~]	4.4	[~]	4.619	[~]	5.372	[~]	4.456	[~]	6.985	[~]	6.04	[~]	6.744	[~]	4.345	[~]	3.906	[~]	7.595	[+]	8.558	[~]	5.814	[~]	5.41	[+]	9.248	[~]
THC0290_T_0192	-1	269671	12	1033	SM1	0.473842	SigA	0.788071	12	THC0290_0222	NA	Protein of unknown function precursor	NA	aagctattcatcgaataaattttgatttcctacACATTTATTTTAATTttacaaaaaaaat	[+]	10.593	[+]	10.691	[+]	11.102	[+]	11.173	[+]	12.325	[+]	12.757	[+]	12.614	[+]	12.35	[+]	13.03	[+]	13.305	[+]	11.381	[+]	11.283	[+]	14.292	[+]	13.514	[+]	13.538	[+]	13.553	[+]	13.386	[+]
THC0290_T_0193	1	269823	242	1725	SM2	0.96901	SigA	1	21	THC0290_0223	ileS	Isoleucine--tRNA ligase	THC0290_v2_0232	atttataggaatattGATGaggtttttaaaAAAAATAGTATTTTCGCACCACGATttaaga	[+]	11.092	[+]	10.866	[+]	10.042	[+]	9.66	[+]	8.029	[+]	8.763	[+]	7.863	[+]	6.726	[+]	7.417	[+]	8.321	[+]	10.334	[+]	9.872	[+]	7.913	[+]	7.768	[+]	6.902	[+]	7.658	[+]	7.291	[+]
THC0290_T_0194	-1	270337	3	102	SM3	0.951683	SigA	0.997001	NA	NA	NA	NA	NA	gctgaacggtataacCTTtgtacatcaaatCTTTGTTGTAGATTTGTtttagaatccacca	[~]	5.455	[~]	4.969	[+]	5.969	[+]	6.149	[+]	6.268	[+]	6.626	[+]	6.988	[+]	8.002	[+]	6.048	[+]	7.886	[~]	5.37	[+]	5.452	[+]	8.733	[+]	7.515	[+]	6.514	[+]	5.569	[+]	8.915	[+]
THC0290_T_0195	1	272089	46	1582	SM6	0.98134	SigECF	0.98134	NA	NA	NA	NA	NA	attttttggtaccttatATAATacttactcatttTTTGCGTTATACGCCAAtatagatggg	[~]	12.768	[+]	12.762	[+]	11.903	[+]	11.865	[+]	10.529	[+]	10.83	[+]	10.568	[+]	9.803	[+]	10.919	[+]	11.676	[+]	12.154	[+]	11.816	[+]	11.958	[+]	10.551	[+]	10.673	[+]	10.775	[+]	11.347	[+]
THC0290_T_0196	1	272894	119	1206	SM1	0.436188	SigA	0.589137	358	THC0290_0224	dksA	DnaK suppressor protein	THC0290_v2_0233	gaaggaacgttagatattgttatttcaggAAAAGAGATAACTTTATCggcagaagatgtag	[~]	12.252	[~]	12.243	[~]	11.482	[~]	11.247	[~]	10.222	[~]	9.585	[~]	9.836	[~]	10.375	[~]	10.421	[~]	10.017	[~]	11.599	[~]	11.721	[~]	10.208	[~]	10.353	[~]	10.692	[~]	10.816	[~]	10.844	[~]
THC0290_T_0197	1	273854	7	814	SM1	0.943685	SigA	1	15	THC0290_0225	lspA	Signal peptidase II	THC0290_v2_0235	TTAtgactttccgcttgcgacttTAGGGTAATAATGTTTATTTTTGTTccgtaataaattt	[+]	10.195	[+]	9.997	[+]	9.676	[+]	9.782	[+]	10.039	[+]	11.029	[+]	10.286	[+]	10.64	[+]	11.147	[+]	11.844	[+]	9.724	[+]	9.442	[+]	11.603	[+]	10.601	[+]	10.497	[+]	10.482	[+]	11.073	[+]
THC0290_T_0198	-1	276064	7	959	SM1	0.906365	SigA	1	15	THC0290_0227	NA	Protein of unknown function	THC0290_v2_0237	TTTAAaacagtcaaatttacgatttCCAAAATATTATTTCTACATTTAAActttaaattta	[+]	9.626	[+]	9.699	[+]	9.951	[+]	9.799	[+]	9.733	[+]	10.06	[+]	9.467	[+]	7.639	[+]	9.804	[+]	10.274	[+]	10.209	[+]	10.31	[+]	10.673	[+]	10.681	[+]	9.446	[+]	9.271	[+]	11.561	[+]
THC0290_T_0199	1	277917	7	1485	SM2	0.916694	SigA	0.98134	28	THC0290_0229	NA	Probable esterase of the alpha-beta hydrolase superfamily	THC0290_v2_0239	tctgaccttataggtaTTTCaaaagccaaaaAAATTACCGACTTTTACAGCAAATTagaca	[+]	10.372	[+]	10.35	[+]	10.499	[+]	10.475	[+]	10.904	[+]	11.529	[~]	10.992	[~]	9.737	[+]	10.976	[+]	10.967	[+]	10.345	[+]	10.372	[+]	10.68	[+]	10.631	[+]	9.694	[+]	9.718	[+]	10.708	[+]
THC0290_T_0200	1	278731	3	1466	NA	0.652782	NA	0.995002	NA	NA	NA	NA	NA	ttactaacaattatcccgtagaagaagtaagaaaAATGGGGGCAGATGTTATTATTGgtgt	[-]	9.878	[-]	9.763	[-]	9.913	[-]	9.897	[-]	10.262	[-]	10.161	[-]	10.159	[-]	8.365	[-]	10.766	[-]	10.008	[-]	9.657	[-]	9.749	[-]	8.684	[-]	9.369	[-]	9.303	[-]	9.441	[-]	9.701	[-]
THC0290_T_0201	1	280331	78	1450	SM1	0.817727	SigA	0.999334	24	THC0290_0230	NA	Probable amino acid-transporting permease	THC0290_v2_0240	AAAtaatcattttttattgtattGTTTTCAAAAAAGTCTATTTTTGGAaaactaaaacaca	[+]	12.632	[+]	12.662	[+]	12.877	[+]	12.948	[+]	12.941	[+]	13.239	[+]	12.533	[+]	12.264	[+]	12.446	[+]	12.517	[+]	12.843	[+]	12.778	[+]	13.017	[+]	13.253	[+]	11.789	[+]	11.849	[+]	13.517	[+]
THC0290_T_0202	1	281748	3	172	NA	0.927024	NA	0.993669	215;346	THC0290_N_0176;THC0290_0231	NA;hmgA	new transcription segment;Homogentisate 1,2-dioxygenase	NA;THC0290_v2_0241	agtttgtttagcaatgatatacggtcttggctggACAAACTGGTTAAGACTTGCAGTttgg	[-]	9.485	[-]	9.475	[-]	9.251	[-]	9.225	[-]	8.711	[-]	8.086	[-]	8.203	[-]	7.378	[-]	8.724	[-]	6.89	[-]	9.174	[-]	9.621	[-]	7.679	[~]	10.132	[-]	8.061	[-]	8.064	[-]	9.102	[-]
THC0290_T_0203	1	281962	94	1172	SM1	0.807398	SigA	1	1;132	THC0290_N_0176;THC0290_0231	NA;hmgA	new transcription segment;Homogentisate 1,2-dioxygenase	NA;THC0290_v2_0241	ATTtcaaaataaaaggctcgtaaAAATAATTTTTTCCCGATATTTGTAatatgaaatctac	[+]	11.061	[+]	11.101	[+]	11.308	[+]	11.29	[+]	11.545	[+]	11.927	[+]	12.024	[+]	10.573	[+]	11.991	[+]	11.896	[+]	11.371	[+]	11.282	[+]	12.433	[+]	13.923	[+]	13.256	[+]	12.469	[+]	12.513	[+]
THC0290_T_0204	1	282321	10	229	NA	0.567478	NA	0.97001	NA	NA	NA	NA	NA	tcggtcgaaccaaaaatagccataggtaaaaacataaaatcattattactaaaaggtttcg	[~]	11.947	[~]	12.053	[~]	12.422	[~]	12.419	[~]	12.774	[~]	12.921	[~]	13.227	[~]	9.723	[~]	12.796	[~]	12.313	[~]	12.358	[~]	12.285	[~]	12.241	[~]	11.713	[~]	12.585	[~]	12.285	[~]	12.173	[~]
THC0290_T_0205	1	284740	132	496	SM2	0.841719	SigA	0.973675	1;170	THC0290_N_0179;THC0290_0233	NA;NA	new transcription segment;Protein of unknown function precursor	NA;NA	agtttgttttttgTTAGaaattaacgaatTCCCACACTACTTTTGCACTCGCAAttgaggg	[-]	9.205	[-]	8.974	[-]	8.485	[-]	8.795	[-]	8.607	[-]	9.07	[-]	8.899	[-]	10.503	[-]	10.187	[-]	10.537	[-]	8.55	[-]	8.449	[~]	11.222	[~]	10.938	[~]	10.615	[-]	9.966	[~]	11.07	[~]
THC0290_T_0206	1	285426	7	1399	NA	0.983339	NA	0.999334	256	THC0290_0234	NA	Tryptophan 2,3-dioxygenase	THC0290_v2_0244	gacttaatattGGAGaatcaatcatgatagatatGTTTTTTGATGACGAAATCACTAaatt	[~]	11.035	[~]	11.319	[~]	11.761	[~]	11.649	[~]	11.461	[~]	11.1	[~]	10.793	[~]	10.837	[~]	11.304	[~]	10.942	[~]	11.48	[~]	11.665	[~]	10.381	[~]	10.779	[~]	10.691	[~]	10.833	[+]	11.07	[+]
THC0290_T_0207	1	285809	4	517	NA	0.685105	NA	0.918361	NA	NA	NA	NA	NA	cctagaaggattgctttgggctaaacccattacttattgggattatattcaaacagatgcg	[~]	11.969	[~]	12.15	[~]	12.531	[~]	12.375	[~]	12.091	[~]	11.936	[~]	11.422	[-]	10.476	[-]	10.659	[-]	10.427	[~]	12.485	[~]	12.565	[~]	10.383	[-]	10.25	[~]	10.566	[~]	10.704	[-]	10.63	[-]
THC0290_T_0208	1	287191	4	937	SM1	0.656781	SigA	0.998001	NA	NA	NA	NA	NA	AAAtggtctatcgatttttttaaATCTAAAAAAGGAGATAAATTTGCAgtaacatttaccg	[~]	10.664	[~]	10.381	[~]	10.497	[~]	10.544	[~]	10.189	[~]	9.963	[~]	9.935	[~]	9.883	[~]	10.275	[+]	10.28	[~]	10.664	[~]	10.67	[+]	10.594	[+]	10.6	[+]	9.84	[~]	9.835	[+]	11.339	[+]
THC0290_T_0209	1	287938	11	45	NA	0.755415	NA	0.989337	NA	NA	NA	NA	NA	atcttttttcgacaaccaaaaccgaagaaagtaataATGATAGTATGAAGAAATTTTTGat	[~]	11.107	[~]	11.245	[~]	11.211	[~]	11.224	[~]	11.03	[~]	11.106	[~]	10.515	[+]	10.35	[~]	10.477	[~]	10.019	[~]	11.343	[~]	11.355	[~]	10.33	[~]	10.182	[~]	10.296	[~]	10.19	[~]	10.057	[~]
THC0290_T_0210	-1	294288	6	1330	NA	0.948017	NA	0.973009	NA	NA	NA	NA	NA	tgttgaaaacatgaaATCCaacacgcagtgggaTCCTACAAAATACTTGAACATGTGGacc	[+]	12.036	[+]	12.277	[~]	14.22	[~]	14.377	[+]	13.771	[+]	13.627	[~]	14.152	[+]	10.508	[~]	13.883	[~]	13.057	[+]	13.923	[+]	13.619	[~]	12.095	[~]	11.572	[~]	13.124	[+]	13.017	[~]	12.042	[~]
THC0290_T_0211	-1	294924	21	1226	SM1	0.653116	SigA	1	26	THC0290_0238	fpp2	Psychrophilic metalloprotease Fpp2 precursor	NA	TTCtcgttaaaaaaattgtgcaaTTTATAATTAATGAATACTTTAGCAtccaattttaacc	[+]	11.445	[+]	11.612	[+]	13.895	[+]	13.98	[+]	13.285	[+]	13.57	[+]	13.288	[+]	10.723	[+]	13.559	[+]	13.469	[+]	13.263	[+]	13.12	[+]	12.748	[+]	12.309	[+]	12.869	[+]	12.994	[+]	12.771	[+]
THC0290_T_0212	1	295135	9	860	SM1	0.957681	SigA	0.999334	15	THC0290_0239	ribF	Bifunctional riboflavin biosynthesis protein RibF : Riboflavin kinase and FMN adenylyltransferase	THC0290_v2_0249	ACTttggtagtcttctttgaaaTTCAAAACTTAAGCTTATATTTGTTctttaaaattaatt	[+]	10.724	[+]	10.69	[+]	10.449	[+]	10.485	[+]	10.448	[+]	10.771	[+]	10.5	[+]	10.584	[+]	11.06	[+]	11.781	[+]	10.587	[+]	10.504	[+]	12.762	[+]	14.443	[+]	13.201	[+]	11.759	[+]	13.393	[+]
THC0290_T_0213	1	296260	72	1804	SM1	0.611463	SigA	0.999	19	THC0290_0240	bioB	Biotin synthase	THC0290_v2_0250	AAAtgaattaggaacgtaaaactTTAAACCGAAATCCTTATTTTTGACccctatttataag	[+]	12.471	[+]	12.521	[+]	12.124	[+]	12.087	[+]	11.291	[+]	11.036	[+]	10.699	[~]	10.241	[+]	11.022	[~]	10.977	[+]	12.257	[+]	12.179	[~]	10.165	[~]	10.281	[~]	10.368	[~]	10.46	[~]	9.956	[~]
THC0290_T_0214	1	297509	8	912	NA	0.765078	NA	0.886371	-2	THC0290_N_0184	NA	new transcription segment	NA	gtatgctatggctacaaatgctagccataaaatgCCATTGTTAATAGGAAATCCGGGtggt	[~]	7.049	[~]	7.109	[~]	6.888	[~]	7.008	[~]	6.967	[~]	6.707	[~]	6.9	[~]	5.819	[+]	8.756	[~]	8.486	[~]	6.822	[~]	7.043	[+]	7.715	[+]	10.193	[+]	8.754	[+]	8.479	[+]	11.21	[+]
THC0290_T_0215	-1	297876	64	238	NA	0.917361	NA	0.999667	0;253	THC0290_tRNA_0005;THC0290_0241	NA;NA	transfer RNA-Met;Biotin synthase	NA;NA	ctcaaataagtcttatgtgttattcataagcacaaGACAAAACAAAAACAGGTCCTATAGc	[-]	4.142	[-]	4.969	[-]	4.518	[-]	4.551	[-]	5.826	[-]	6.055	[-]	6.289	[-]	7.608	[-]	9.515	[-]	10.029	[-]	4.802	[-]	4.903	[-]	10.425	[-]	10.806	[-]	9.42	[-]	8.897	[-]	11.182	[-]
THC0290_T_0216	1	298577	225	1122	SM1	0.947351	SigA	1	0;394	THC0290_0243;THC0290_0244	rbfA;NA	Ribosome-binding factor A;Probable ABC-type transport system, permease component	THC0290_v2_0253;THC0290_v2_0254	ATTtgtaataagtgttcttttttTTCGCTAAAATATCGTATTTTTGCGgtatggaaacaaa	[+]	11.815	[+]	11.527	[+]	11.546	[+]	11.462	[+]	12.094	[+]	12.986	[+]	12.671	[+]	12.2	[+]	13.636	[+]	14.342	[+]	11.478	[+]	11.487	[+]	14.829	[+]	13.656	[+]	13.2	[+]	13.157	[+]	14.876	[+]
THC0290_T_0217	1	299114	3	1184	SM1	0.611796	SigA	0.996668	NA	NA	NA	NA	NA	ATTgtaattggtgctatggttctTTTTGTTTTTATGTCTATCTTTAGcgggctaaaagagt	[~]	12.318	[~]	12.021	[~]	11.607	[~]	11.956	[~]	12.374	[~]	12.205	[~]	12.685	[~]	12.398	[~]	13.49	[~]	13.241	[~]	11.836	[~]	11.689	[~]	12.89	[~]	13.165	[~]	12.922	[~]	13.248	[~]	12.97	[~]
THC0290_T_0218	1	299878	4	667	NA	0.80873	NA	1	293	THC0290_N_0186	NA	new transcription segment	NA	cttgtttacccttgcaGGTGCtattatcatgatgGTTCTGGATAAAAAAGACAATCTGAga	[~]	10.688	[~]	10.557	[~]	10.4	[~]	10.544	[~]	11.084	[~]	11.35	[~]	11.402	[~]	12.149	[~]	11.671	[~]	11.598	[~]	10.422	[~]	10.31	[~]	11.703	[~]	11.605	[~]	11.45	[~]	11.345	[+]	11.701	[~]
THC0290_T_0219	-1	301112	4	515	NA	0.590137	NA	0.994335	NA	NA	NA	NA	NA	agttttaaacaatactAaagtttttccagcacgtTTATACGGAAACAAAGAAAAAACAGgt	[~]	12.917	[~]	12.867	[~]	12.478	[~]	12.433	[~]	12.752	[~]	12.723	[~]	12.866	[~]	12.641	[~]	13.079	[-]	12.953	[~]	12.453	[~]	12.435	[-]	13.01	[~]	12.817	[~]	13.105	[~]	12.976	[-]	13.762	[-]
THC0290_T_0220	-1	301146	3	112	NA	0.473842	NA	0.962013	NA	NA	NA	NA	NA	atgttttagactatttcgacgaaggagatgttttaGTTTTAAACAATACTAAAGTTTttcc	[~]	12.967	[~]	12.896	[~]	12.541	[~]	12.652	[~]	12.987	[~]	12.99	[~]	13.069	[~]	12.717	[~]	13.23	[~]	13.096	[~]	12.502	[~]	12.436	[-]	13.051	[~]	12.992	[~]	13.179	[~]	13.033	[-]	14.403	[-]
THC0290_T_0221	-1	301389	27	990	SM1	0.527491	SigA	0.998667	1;60	THC0290_N_0187;THC0290_0245	NA;queA	new transcription segment;S-adenosylmethionine:tRNA-ribosyltransferase- isomerase	NA;THC0290_v2_0255	TAAAcccaaaaacacttgacaacgCCTATCTCACAATCGTATATTTGCAaacgatttaatt	[+]	13.009	[+]	12.856	[+]	12.672	[+]	12.552	[+]	12.842	[+]	14.003	[+]	13.175	[+]	13.058	[+]	13.907	[+]	14.799	[+]	12.625	[+]	12.694	[+]	15.047	[+]	13.803	[+]	13.558	[+]	13.755	[+]	15.459	[+]
THC0290_T_0222	-1	310479	5	770	SM1	0.835721	SigA	1	1;67	THC0290_N_0193;THC0290_0254	NA;rsgA	new transcription segment;Putative ribosome biogenesis GTPase RsgA	NA;THC0290_v2_0264	ACGcctaaaaatcacgaattataTCTTAAAATTAATCGTAATTTTGCAattcgtaattatc	[~]	10.365	[~]	10.365	[~]	10.12	[~]	10.185	[~]	10.503	[+]	10.953	[~]	10.893	[+]	11.363	[~]	11.363	[+]	12.209	[~]	10.195	[~]	10.32	[+]	12.39	[~]	11.999	[+]	11.638	[+]	11.559	[+]	11.224	[+]
THC0290_T_0223	-1	311634	3	461	SM1	0.953682	SigA	0.985338	30	THC0290_0255	NA	Putative phospho-2-dehydro-3-deoxyheptonate aldolase	THC0290_v2_0265	AAAacaataaaaacctcaaaattGTAAAATTTCTTCATGAACTTTGCGaacacctttgtgg	[+]	10.675	[+]	10.503	[+]	10.375	[+]	10.232	[+]	10.476	[+]	10.838	[+]	11.337	[+]	8.666	[+]	11.018	[+]	11.395	[+]	10.681	[+]	10.446	[+]	12.334	[~]	11.819	[+]	11.342	[+]	10.808	[+]	11.305	[+]
THC0290_T_0224	-1	313940	276	572	SM1	0.6008	SigA	1	1;172	THC0290_N_0195;THC0290_0257	NA;pheA	new transcription segment;Prephenate dehydratase	NA;THC0290_v2_0267	TTTtttttcaaaaatgtattttgATACCATTTTTTTAGTATGTTTGTCattcaaatcgctc	[+]	7.948	[+]	7.914	[+]	8.528	[+]	8.523	[+]	8.403	[+]	9.132	[+]	8.002	[+]	9.815	[+]	8.731	[+]	10.559	[+]	8.451	[+]	8.457	[+]	11.731	[+]	11.576	[+]	9.909	[+]	9.597	[+]	11.243	[+]
THC0290_T_0225	1	314038	5	1510	SM1	0.996335	SigA	1	14	THC0290_0258	gldA	Gliding motility protein GldA	THC0290_v2_0268	AAAATaagtttgtcgaaatttttgAGGCTCTTTTCTTCTTACTTTTGCTacaaatttctat	[+]	10.259	[+]	10.183	[+]	9.879	[+]	9.896	[+]	10.044	[+]	10.149	[+]	9.516	[+]	9.568	[+]	10.221	[+]	10.754	[+]	9.895	[+]	9.989	[+]	9.922	[+]	9.378	[+]	9.247	[+]	9.591	[+]	9.425	[+]
THC0290_T_0226	1	314330	3	1223	NA	0.522493	NA	0.893369	NA	NA	NA	NA	NA	gttgggtatttgccagaacacaatccgttgtatttaGAGTTGTATGTTAGAGAATATTTGG	[~]	10.753	[~]	10.978	[~]	10.552	[~]	10.782	[~]	10.898	[+]	10.63	[+]	10.687	[~]	10.701	[+]	11.171	[+]	11.069	[~]	10.546	[~]	10.618	[+]	9.986	[+]	10.118	[+]	10.277	[~]	10.32	[+]	9.964	[+]
THC0290_T_0227	-1	316350	4	552	SM1	0.979007	SigA	0.993336	NA	NA	NA	NA	NA	TTTctgagtcgattttagtttcaAGTCAAAAGAAGCAGTAAGTTTGTTaaactcttttgtt	[+]	5.041	[+]	5.094	[~]	4.819	[~]	4.558	[+]	5.397	[+]	5.214	[~]	5.163	[~]	6.737	[+]	5.943	[+]	5.795	[~]	4.884	[~]	4.681	[+]	7.324	[+]	6.988	[+]	6.479	[+]	6.104	[-]	5.69	[~]
THC0290_T_0228	-1	324199	17	1458	SM1	0.427524	SigA	0.7011	0;234	THC0290_0266;THC0290_N_0200	NA;NA	Transcriptional regulator, XRE family;new transcription segment	THC0290_v2_0276;NA	gttttatttatgcggtaaattatatgcgaCTATTTTACAAATTTCGTtaaatggaaaaatt	[+]	8.429	[+]	8.482	[+]	8.284	[+]	8.22	[+]	7.865	[+]	8.87	[+]	7.135	[+]	7.968	[+]	7.758	[+]	8.738	[+]	8.614	[+]	8.659	[+]	9.486	[+]	9.44	[+]	7.771	[+]	8.246	[+]	10.045	[+]
THC0290_T_0229	1	325562	8	636	SM1	0.949683	SigA	0.992669	1;60	THC0290_N_0202;THC0290_0268	NA;NA	new transcription segment;Truncated Eco57I restriction-modification methylase family protein	NA;THC0290_v2_0278	TTttttttaaatttatgaattTAAAAAAATAAGGTCTATATTTGTTggttaatacactgtt	[+]	10.206	[+]	10.048	[+]	9.953	[+]	9.728	[+]	9.98	[+]	11.046	[+]	10.386	[+]	11.624	[+]	10.714	[+]	12.753	[+]	10.118	[+]	10.371	[+]	13.66	[+]	12.206	[+]	11.331	[+]	11.445	[+]	12.448	[+]
THC0290_T_0230	-1	332812	6253	1361	SM2	0.998667	SigA	0.999667	0;77	THC0290_tRNA_0006;THC0290_N_0204	NA;NA	transfer RNA-Asp;new transcription segment	NA;NA	gCTTGcgcaactcaaaAAAGGTTGTATCTTTGCCACCGCAAtaaggcgcaggtttggtagt	[+]	10.171	[+]	9.837	[~]	9.154	[~]	9.116	[~]	8.77	[-]	9.532	[-]	9.404	[~]	8.966	[~]	10.058	[~]	10.602	[~]	9.541	[~]	9.077	[~]	10.57	[-]	9.958	[-]	9.463	[-]	9.269	[~]	9.441	[~]
THC0290_T_0231	-1	332825	1448	384	SM2	0.996001	SigA	1	13;90	THC0290_tRNA_0006;THC0290_N_0204	NA;NA	transfer RNA-Asp;new transcription segment	NA;NA	aaattaaaaaaaggCTTGcgcaactcaaaAAAGGTTGTATCTTTGCCACCGCAAtaaggcg	[+]	14.021	[+]	13.962	[+]	14.293	[+]	14.093	[+]	14.06	[+]	16.367	[+]	14.465	[+]	16.13	[+]	15.277	[+]	16.417	[+]	14.517	[+]	14.285	[+]	16.294	[+]	15.461	[+]	14.887	[+]	14.054	[+]	15.858	[+]
THC0290_T_0232	-1	333825	15	310	SM1	0.762079	SigA	0.998667	0	THC0290_0275	NA	Protein of unknown function	THC0290_v2_0285	TTGttatcttttaatttttaaatCTTTCAATCTTTCAATACATTTGAAgtatgaatataga	[+]	10.647	[+]	10.756	[+]	10.909	[+]	10.727	[+]	11.25	[+]	11.709	[+]	12.787	[+]	10.033	[+]	11.719	[+]	11.556	[+]	11.013	[+]	10.774	[+]	11.848	[+]	11.756	[+]	11.031	[+]	10.624	[+]	12.245	[+]
THC0290_T_0233	-1	334384	81	591	SM1	0.906365	SigA	1	21;339	THC0290_0276;THC0290_N_0206	NA;NA	Thioredoxin family protein;new transcription segment	THC0290_v2_0286;NA	ACTgattttcaatcaacaaactaTCCAAAATAAAATTCTACTTTTGTAtaacaattaataa	[+]	13.141	[+]	13.202	[+]	13.834	[+]	13.56	[+]	13.812	[+]	14.436	[+]	14.333	[+]	12.029	[+]	14.161	[+]	14.828	[+]	13.902	[+]	13.765	[+]	15.812	[+]	15.571	[+]	15.016	[+]	14.577	[+]	16.382	[+]
THC0290_T_0234	-1	335514	252	1798	SM1	0.555148	SigA	0.996001	16	THC0290_0277	NA	Protein of unknown function precursor, putative outer membrane protein	NA	CTAttttgaaaatatttctaaatAGCAGTCAAATTAATTAAGTTTGTGacattaaaaaacc	[+]	14.186	[+]	14.507	[+]	14.96	[+]	14.727	[+]	14.565	[+]	14.711	[+]	13.567	[+]	11.169	[+]	13.013	[+]	13.12	[+]	14.761	[+]	14.79	[+]	12.57	[+]	11.983	[+]	12.338	[+]	12.556	[+]	12.24	[+]
THC0290_T_0235	-1	336451	5	498	SM2	0.768077	SigA	0.995335	35	THC0290_0278	NA	Probable deoxynucleoside kinase	THC0290_v2_0288	gctacaacagttttTATTataaagaccaaAATTTATCTATTTTTACACTCGAAGatattac	[+]	11.348	[+]	11.464	[+]	11.166	[+]	11.059	[+]	10.84	[+]	11.045	[+]	10.357	[+]	9.779	[+]	10.47	[+]	10.899	[+]	11.474	[+]	11.481	[+]	11.797	[~]	11.273	[+]	11.077	[+]	11.057	[+]	11.5	[+]
THC0290_T_0236	-1	337207	8	685	SM5	0.976341	ND	0.976341	0	THC0290_0279	NA	Hypothetical protein precursor	NA	tcgatttcattaaaTatttagatttcaaagatatTGTTTACCTTGCATCGatgaaaaaaat	[+]	6.897	[+]	6.994	[+]	6.972	[+]	6.82	[+]	7.071	[+]	7.731	[+]	7.174	[+]	8.012	[+]	7.558	[+]	8.205	[+]	7.149	[+]	6.971	[+]	9.157	[+]	7.855	[+]	7.369	[+]	6.963	[+]	7.27	[+]
THC0290_T_0237	-1	345116	147	1579	SM1	0.89137	SigA	0.98867	-1;3;129	THC0290_N_0210;THC0290_miscRNA_0001;THC0290_0287	NA;NA;metK	new transcription segment;SAM-II long loop;Methionine adenosyltransferase	NA;NA;THC0290_v2_0295	AAaagttaagattaatttgcaaTTCGATTTCGTTTCATACATTTGTAaccgaaaatcgaga	[+]	12.313	[+]	12.15	[+]	11.567	[+]	11.388	[+]	10.234	[+]	10.724	[+]	10.306	[+]	10.033	[+]	9.898	[+]	10.178	[+]	11.64	[+]	11.139	[+]	12.433	[+]	12.655	[+]	11.623	[+]	11.469	[+]	13.546	[+]
THC0290_T_0238	-1	350162	69	1777	SM2	0.901033	SigA	1	1;44	THC0290_N_0213;THC0290_0290	NA;gdhA	new transcription segment;Glutamate dehydrogenase (NADP+)	NA;THC0290_v2_0298	ttaacacaaaaatatCTTGgctatatttttATAAAATGTATATTTGCTACTCATAacgaaa	[+]	14.124	[+]	14.252	[+]	14.388	[+]	14.389	[+]	14.026	[+]	14.853	[+]	13.494	[+]	13.4	[+]	13.229	[+]	14.173	[+]	14.421	[+]	14.415	[+]	14.126	[+]	13.368	[+]	13.135	[+]	13.273	[+]	13.541	[+]
THC0290_T_0239	1	350287	14	963	SM1	0.805398	SigA	1	23	THC0290_0291	NA	Protein of unknown function precursor	NA	ATAacatgcttttttttctgaaaTGTTTGATGTTTTTATATATTTGTCttctaatgtatta	[+]	10.724	[+]	10.71	[+]	11.237	[+]	11.193	[+]	11.439	[+]	12.127	[+]	11.382	[+]	8.538	[+]	11.749	[+]	12.026	[+]	11.166	[+]	10.939	[+]	12.544	[+]	12.637	[+]	11.733	[+]	11.681	[+]	12.698	[+]
THC0290_T_0240	1	350605	4	409	NA	0.827058	NA	0.998001	NA	NA	NA	NA	NA	taatgatcacttcaaagttagaagcgaattgtctTATAGCAAAACAAAATTTAACATgttt	[~]	10.572	[-]	10.561	[~]	10.956	[~]	11.103	[~]	11.393	[~]	11.072	[~]	11.131	[~]	9.143	[~]	11.807	[~]	11.233	[~]	11.093	[~]	10.846	[~]	11.665	[~]	12.15	[~]	11.624	[~]	11.627	[-]	11.814	[~]
THC0290_T_0241	-1	352114	14	311	SM1	0.970343	SigA	1	12	THC0290_0292	NA	Protein of unknown function	NA	ATATatatacaaaagcttcttggaAACGAGAAGCTTTTATATTTTTGTAccaaatttaaat	[+]	11.446	[+]	11.408	[+]	10.918	[+]	10.74	[+]	10.899	[+]	10.997	[+]	11.315	[+]	7.495	[+]	11.191	[+]	11.491	[+]	11.137	[+]	10.955	[+]	11.691	[+]	11.479	[+]	10.598	[+]	10.271	[+]	12.603	[+]
THC0290_T_0242	-1	353231	7	1562	SM1	0.787071	SigA	0.946684	20	THC0290_0293	NA	Protein of unknown function precursor	THC0290_v2_0302	TGtttgaagtttgtacttaaaaTATTCGAAATAATTGTAAGTTTGATtgcatataattaaa	[+]	9.505	[+]	9.765	[+]	10.755	[+]	10.483	[+]	10.157	[+]	10.232	[+]	9.465	[+]	9.924	[+]	8.191	[+]	10.011	[+]	10.602	[+]	10.805	[+]	11.061	[+]	10.905	[+]	9.592	[+]	9.613	[+]	11.267	[+]
THC0290_T_0243	1	353300	85	1831	SM2	0.912696	SigA	1	14	THC0290_0294	aspS	Aspartate--tRNA ligase	THC0290_v2_0303	atttcgaatattttaagtacaaacttcaaaCAAAATAGTATTTTTGCAACCTAAAatttag	[+]	12.71	[+]	12.739	[+]	12.141	[+]	12.049	[+]	11.317	[+]	10.919	[+]	11.201	[+]	9.617	[+]	11.688	[+]	11.432	[+]	12.219	[+]	12.086	[+]	10.624	[+]	11.194	[+]	11.111	[+]	10.945	[+]	11.473	[+]
THC0290_T_0244	1	354176	5	1719	NA	0.63912	NA	0.999	NA	NA	NA	NA	NA	tcgtatgacatataatCatgctatgaaaacctacGGAAATGACAAACCAGACATTCGTTtc	[-]	11.721	[~]	11.632	[-]	10.801	[-]	10.828	[-]	9.995	[-]	9.395	[-]	10.046	[-]	6.883	[~]	10.501	[-]	10.092	[-]	11.071	[-]	10.831	[~]	9.521	[~]	9.607	[~]	9.74	[~]	9.779	[~]	8.945	[-]
THC0290_T_0245	1	354771	3	593	NA	0.598467	NA	0.99067	399	THC0290_0295	NA	Probable cold shock protein	THC0290_v2_0304	gcttacgatatggtcctcaacggaaacgaaatagGCGGAGGTTCTATCAGAATTCATGAta	[~]	13.204	[~]	12.91	[-]	12.194	[~]	12.156	[-]	11.202	[-]	10.845	[~]	11.406	[~]	7.819	[~]	11.609	[~]	11.591	[~]	12.335	[-]	11.858	[-]	10.213	[~]	10.272	[~]	10.753	[~]	11.025	[~]	10.45	[~]
THC0290_T_0246	1	354811	3	151	SM6	0.374542	NA	0.620127	359	THC0290_0295	NA	Probable cold shock protein	THC0290_v2_0304	gttctatcagaattcatgataaaaatacgcaagcaTTAATGTTTAAATACTTaggatttac	[~]	12.983	[~]	12.792	[~]	12.036	[~]	12.075	[-]	11.091	[-]	10.721	[~]	11.233	[~]	7.818	[~]	11.619	[~]	11.437	[~]	12.148	[~]	11.862	[-]	9.972	[-]	10.265	[-]	10.745	[~]	10.899	[-]	10.489	[-]
THC0290_T_0247	1	355145	2393	1385	SM1	0.948351	SigA	1	25;226	THC0290_0295;THC0290_N_0216	NA;NA	Probable cold shock protein;new transcription segment	THC0290_v2_0304;NA	ATAttaacacaaattcacgtttgTATTATTTTAAAGATTACATTTGCTacattataaatta	[+]	14.928	[+]	14.885	[+]	15.383	[+]	14.825	[+]	14.508	[+]	15.282	[+]	14.242	[+]	14.274	[+]	14.22	[+]	14.984	[+]	15.367	[+]	15.539	[+]	14.483	[+]	13.541	[+]	13.675	[+]	14.201	[+]	14.243	[+]
THC0290_T_0248	-1	355957	26	1075	SM1	0.452516	SigA	0.995668	0;441	THC0290_0296;THC0290_N_0217	NA;NA	Probable cytosine/adenosine deaminase;new transcription segment	THC0290_v2_0305;NA	tcgttctattaaatatagctaaaattataCCAATTTTGTATTTTTACCgtatggaaaatat	[+]	9.283	[+]	9.367	[+]	9.826	[+]	9.65	[+]	10.242	[+]	11.571	[+]	10.964	[+]	9.947	[+]	11.34	[+]	11.932	[+]	9.64	[+]	9.761	[+]	12.07	[+]	11.013	[+]	10.376	[+]	10.34	[+]	11.482	[+]
THC0290_T_0249	1	356002	3	192	SM4	0.992669	Sig54	0.992669	18	THC0290_0297	NA	Protein of unknown function	NA	TTCCatacggtaaaaatacaaaaTTGGTATAATTTTAGCTATAtttaatagaacgaaataa	[+]	8.053	[+]	8.471	[+]	8.709	[+]	8.908	[+]	8.729	[+]	8.581	[+]	8.252	[+]	8.213	[+]	8.502	[+]	8.568	[+]	8.73	[+]	8.931	[+]	9.52	[+]	9.527	[+]	8.822	[+]	9.267	[+]	9.996	[+]
THC0290_T_0250	-1	359821	18	581	NA	0.898367	NA	0.999667	NA	NA	NA	NA	NA	taaacactggaAcattagctggaaaaaattacccAGCAGCTGATAATGGTTTTACCAatgg	[~]	14.126	[~]	14.084	[~]	14.41	[~]	14.484	[~]	13.535	[~]	13.413	[~]	12.795	[~]	9.673	[~]	11.496	[~]	11.203	[~]	14.579	[~]	14.403	[~]	10.857	[~]	10.465	[~]	11.098	[~]	11.246	[+]	10.742	[~]
THC0290_T_0251	-1	360482	7	1752	NA	0.415528	NA	0.999	NA	NA	NA	NA	NA	ttcttaaaagaaaacactaaatcgctagtagcaaacCCAGGCACAACAAATTACAGGgtcg	[~]	14.443	[~]	14.518	[~]	15.327	[~]	14.956	[~]	14.15	[~]	14.086	[~]	13.307	[~]	10.122	[~]	12.11	[~]	11.707	[~]	15.276	[~]	15.277	[~]	11.438	[~]	10.965	[~]	11.659	[~]	11.481	[~]	11.397	[~]
THC0290_T_0252	-1	361253	10	1657	SM1	0.854049	SigA	0.999667	28	THC0290_0299	NA	Probable M36 fungalysin family metalloprotease precursor	THC0290_v2_0308	AAAAGAgaagaaaataattttacatcTCTAATTATTTATTATATATTTGAAaaaagttaac	[+]	13.268	[+]	13.191	[+]	13.806	[+]	13.671	[+]	12.646	[+]	13.107	[+]	11.418	[+]	9.99	[+]	10.556	[+]	10.944	[+]	14.139	[+]	14.004	[+]	12.377	[+]	12.281	[+]	10.782	[+]	10.713	[+]	12.759	[+]
THC0290_T_0253	1	361576	6	1089	SM1	0.956348	SigA	0.999667	1	THC0290_N_0219	NA	new transcription segment	NA	GTTgtgaaactcgacaaaaaagtATTAAAAAAAGTATATAACTTTGCAttgctattaatta	[+]	8.623	[+]	8.705	[+]	8.984	[+]	8.79	[+]	9.21	[+]	10.399	[+]	9.736	[+]	10.364	[+]	11.065	[+]	11.837	[+]	8.967	[+]	9.02	[+]	11.617	[+]	10.87	[+]	10.677	[+]	10.977	[+]	11.905	[+]
THC0290_T_0254	-1	364597	3	1227	SM1	0.997334	SigA	1	24	THC0290_0300	NA	Probable M36 fungalysin family metalloprotease precursor	THC0290_v2_0310	TATatcataaaaaaaacacataGTTAATTATTAATTATATATTTGTGaataattaaccaaa	[~]	10.4	[~]	10.724	[+]	12.125	[+]	12.237	[+]	11.671	[+]	12.525	[+]	11.621	[+]	11.157	[+]	11.395	[+]	11.813	[+]	11.714	[+]	11.66	[+]	11.527	[+]	10.907	[+]	11.039	[+]	11.053	[+]	11.411	[+]
THC0290_T_0255	1	369305	4	833	SM3	0.960013	SigA	0.998667	NA	NA	NA	NA	NA	tcgccttcaatactTTGgtaaaaatgttctGTGTTTTCTAATTTTGCataatgagagtctg	[+]	6.853	[+]	6.485	[+]	6.59	[+]	6.373	[+]	6.86	[+]	8.08	[+]	7.573	[+]	9.548	[+]	8.693	[+]	9.452	[+]	6.631	[+]	6.319	[+]	10.183	[+]	8.907	[+]	8.07	[+]	7.851	[~]	7.956	[+]
THC0290_T_0256	1	370699	4	279	NA	0.812063	NA	0.991003	NA	NA	NA	NA	NA	actttattcacgattggtttgtttttgttggtttATATCCCAAAAATAGTCTTGTCTttgt	[~]	10.697	[+]	10.765	[+]	10.256	[+]	10.313	[~]	9.961	[+]	9.485	[~]	10.182	[~]	10.14	[+]	10.43	[~]	10.009	[+]	10.017	[+]	10.073	[+]	10.892	[~]	11.491	[~]	11.016	[~]	10.911	[~]	11.824	[~]
THC0290_T_0257	1	371725	147	969	SM1	0.964345	SigA	1	23;320	THC0290_0305;THC0290_N_0222	NA;NA	Thioredoxin family protein;new transcription segment	THC0290_v2_0315;NA	AAAaaagggcaaaatgtagcttaATATACTAAAAAGACTATATTTGTAtaacaaagtttaa	[+]	10.723	[+]	10.845	[+]	11.049	[+]	10.9	[+]	10.899	[+]	11.611	[+]	10.782	[+]	10.883	[+]	11.07	[+]	11.483	[+]	11.079	[+]	11.313	[+]	12.745	[+]	13.026	[+]	11.349	[+]	11.212	[+]	13.643	[+]
THC0290_T_0258	1	371854	6	232	NA	0.94935	NA	0.994002	191	THC0290_N_0222	NA	new transcription segment	NA	tacagactggaatgaatcttcacaatcgatggatCCCGTGATAAAAGATGTAGCCGCTGca	[~]	11.601	[~]	11.785	[+]	11.85	[+]	11.833	[+]	11.86	[~]	12.181	[~]	11.377	[+]	11.861	[~]	11.463	[~]	11.476	[+]	11.891	[~]	11.913	[~]	12.883	[~]	13.086	[~]	11.696	[~]	11.519	[~]	13.519	[~]
THC0290_T_0259	1	376411	3	1177	SM3	0.835721	SigA	0.853382	-6	THC0290_N_0223	NA	new transcription segment	NA	aacgaataggtatgttTTCattttttgtatatTTTTTTTGTAAATATAAgcaaagtattag	[~]	4.065	[~]	4.172	[+]	5.116	[~]	4.133	[~]	3.945	[~]	4.45	[~]	4.631	[~]	6.042	[~]	4.321	[~]	4.544	[~]	3.945	[~]	4.097	[+]	5.894	[+]	6.489	[~]	4.445	[~]	4.247	[~]	5.561	[~]
THC0290_T_0260	-1	376567	8	132	NA	0.510163	NA	0.917361	43;186	THC0290_N_0224;THC0290_0309	NA;NA	new transcription segment;Probable outer membrane efflux protein precursor	NA;THC0290_v2_0319	aacaacaaagacactaatttttacaatacagaaaaagaggtttttaatagctacaacaaac	[-]	8.336	[-]	8.273	[-]	9.042	[-]	8.886	[-]	11.158	[-]	11.788	[-]	11.839	[-]	11.96	[-]	12.118	[-]	12.027	[-]	8.176	[-]	8.187	[-]	10.808	[-]	10.086	[-]	9.992	[-]	10.616	[-]	9.143	[-]
THC0290_T_0261	-1	377333	3	33	NA	0.416861	NA	0.984672	NA	NA	NA	NA	NA	tcagaaaattcagttttacccaagcaataaaatcagAATTCCTGTAAACAAAAACAACGtg	[~]	11.963	[~]	12.251	[~]	12.753	[~]	12.627	[~]	13.332	[~]	13.144	[~]	13.742	[~]	11.665	[~]	13.612	[~]	12.886	[~]	12.146	[~]	12.363	[~]	12.368	[~]	11.711	[~]	12.779	[~]	12.823	[~]	11.183	[~]
THC0290_T_0262	-1	378319	5	157	NA	0.609464	NA	0.937687	NA	NA	NA	NA	NA	gattatgcgaaattcctaAAAGcttatggtcaatatCTTGATATAGAGAAACCAACAACTA	[~]	10.723	[~]	10.739	[~]	11.211	[~]	11.363	[~]	12.149	[~]	11.778	[~]	12.436	[~]	10.352	[~]	12.394	[~]	11.657	[~]	10.881	[~]	10.801	[~]	11.116	[~]	11.163	[~]	11.747	[~]	11.772	[~]	10.751	[~]
THC0290_T_0263	-1	379776	38	285	SM1	0.684772	SigA	0.999667	21	THC0290_0310	NA	Probable transmembrane protein of unknown function	NA	ATTtttattttttaccttttgttTAGACAAAAAAATAGTTTCTTTGTAgggtaatatttat	[+]	10.575	[+]	10.306	[+]	10.862	[+]	10.871	[+]	11.759	[+]	11.946	[+]	11.961	[+]	11.702	[+]	12.366	[+]	12.026	[+]	10.558	[+]	10.281	[+]	11.876	[+]	11.409	[+]	11.484	[+]	11.607	[+]	11.363	[+]
THC0290_T_0264	1	379910	135	1070	SM6	0.613129	SigECF	0.613129	0;74;96	THC0290_tRNA_0007;THC0290_N_0226;THC0290_N_0227	NA;NA;NA	transfer RNA-Gln;new transcription segment;new transcription segment	NA;NA;NA	aaaaaagattgtaaatttGCACTcgcaataaggaaTTATTGTAAGGTTACTGgcccatggt	[+]	5.879	[+]	5.789	[+]	6.138	[+]	5.839	[+]	6.373	[+]	9.246	[+]	6.987	[+]	10.032	[+]	9.683	[+]	11.851	[+]	6.262	[+]	6.326	[+]	12.376	[+]	10.288	[+]	9.194	[+]	8.247	[+]	11.24	[+]
THC0290_T_0265	1	379947	35	1387	NA	0.398867	NA	0.921026	-37;37;59	THC0290_tRNA_0007;THC0290_N_0226;THC0290_N_0227	NA;NA;NA	transfer RNA-Gln;new transcription segment;new transcription segment	NA;NA;NA	attgtaaggttactggcccatggtgtaatggtaacACAACTGTTTTTGGTGcagtcgttca	[+]	5.843	[+]	5.76	[+]	5.596	[+]	5.034	[~]	3.937	[+]	4.998	[+]	5.002	[+]	5.085	[~]	3.99	[~]	3.836	[+]	4.937	[~]	4.898	[~]	6.799	[-]	4.375	[~]	3.985	[~]	3.981	[~]	5.712	[+]
THC0290_T_0266	-1	380435	3	78	NA	0.948351	NA	0.998001	405	THC0290_N_0225	NA	new transcription segment	NA	ttacattaaacccagctattggtactttttacctTTCTCATCCCAACATGAAATATTCGaa	[-]	10.372	[-]	10.347	[-]	10.183	[-]	10.351	[-]	10.249	[-]	10.16	[-]	10.235	[+]	11.34	[-]	10.653	[~]	10.476	[-]	10.344	[-]	10.175	[-]	9.644	[-]	9.717	[-]	10.023	[-]	10.39	[-]	8.077	[-]
THC0290_T_0267	-1	381061	89	1326	SM1	0.899034	SigA	0.986338	23	THC0290_0311	fbp	Fructose-bisphosphatase	THC0290_v2_0321	TTTTTtttctgtcgaagtaatgtttTCGAAAATTATAATCGATATTTGCAcaaacaactac	[+]	11.558	[+]	11.78	[+]	11.321	[+]	11.555	[+]	11.254	[+]	11.102	[+]	10.876	[+]	9.396	[+]	10.982	[+]	11.437	[+]	11.43	[+]	11.39	[+]	11.539	[+]	11.444	[+]	10.901	[+]	10.715	[+]	11.851	[+]
THC0290_T_0268	1	381220	60	415	SM1	0.573809	SigA	0.996335	20	THC0290_0312	yggG	Putative secreted M48 family metalloprotease YggG precursor	THC0290_v2_0322	TACGcataaaatattttttcaaatCAAATCAGATTAGATTATATTTGTggtaaataaaatt	[+]	12.283	[+]	12.247	[+]	12.83	[+]	12.997	[+]	13.644	[+]	13.74	[+]	13.549	[+]	13.4	[+]	13.94	[+]	14.163	[+]	12.73	[+]	12.731	[+]	13.849	[+]	14.209	[+]	13.506	[+]	13.727	[+]	15.177	[+]
THC0290_T_0269	1	387574	5	249	SM1	0.955015	SigA	0.993002	28	THC0290_0316	NA	Hypothetical protein precursor	THC0290_v2_0326	TTTttaattttagccacgtttgtTTTAAAAAAAAATATTAATTTTAAAtcattaaaccact	[+]	11.539	[+]	11.77	[+]	13.22	[+]	12.906	[+]	13.682	[+]	14.693	[+]	13.39	[+]	13.152	[+]	10.349	[+]	13.452	[+]	12.898	[+]	13.149	[+]	12.859	[+]	12.472	[+]	12.405	[+]	12.316	[+]	12.931	[+]
THC0290_T_0270	1	391958	8	570	SM1	0.573142	SigA	0.998001	293;434;482	THC0290_0320;THC0290_N_0234;THC0290_0321	NA;NA;NA	Glycerophosphoryl diester phosphodiesterase (fragment);new transcription segment;Protein of unknown function	NA;NA;THC0290_v2_0333	GTActtataaaattcgggattaaCTGAAAAATAAATCTTAATTTAGTCccgaaattaatct	[+]	7.911	[+]	7.974	[+]	7.799	[+]	7.697	[~]	8.242	[~]	8.795	[+]	8.051	[+]	8.613	[+]	9.315	[+]	9.531	[+]	8.107	[+]	8.15	[+]	10.095	[+]	9.899	[+]	8.875	[+]	8.961	[~]	9.484	[+]
THC0290_T_0271	1	392343	8	1124	SM1	0.746751	SigA	0.997334	49;97	THC0290_N_0234;THC0290_0321	NA;NA	new transcription segment;Protein of unknown function	NA;THC0290_v2_0333	CAAattcatacttgggcagtaaaTTCGCCAGAAGGCATTACCTTTGTTcaatcattgctta	[+]	9.547	[+]	9.433	[+]	9.231	[+]	9.357	[+]	9.673	[+]	9.942	[+]	10.147	[~]	8.795	[+]	11.074	[+]	11.181	[+]	9.523	[+]	9.479	[+]	11.532	[+]	11.713	[+]	11.199	[+]	11.062	[+]	12.351	[+]
THC0290_T_0272	-1	394197	54	1556	SM1	0.649117	SigA	0.992003	22	THC0290_0322	NA	Probable transmembrane protein of unknown function	THC0290_v2_0334	TTTtttaataattctttgtttttTAAAATAGTTTATTATTAATTTGTAttgaaaatttatt	[+]	10.267	[+]	10.345	[+]	10.323	[+]	10.362	[+]	10.047	[+]	10.795	[+]	9.607	[+]	9.575	[+]	10.244	[+]	10.901	[+]	10.542	[+]	10.37	[+]	11.688	[+]	11.041	[+]	9.739	[+]	9.762	[+]	11.193	[+]
THC0290_T_0273	1	394260	7	808	SM1	0.921026	SigA	0.999667	13	THC0290_0323	mvaD	Diphosphomevalonate decarboxylase	THC0290_v2_0335	TAATAaactattttaaaaaacaaagAATTATTAAAAAAAGTATCTTTGCTtaaattttaaa	[+]	10.428	[+]	10.352	[+]	10.19	[+]	10.276	[+]	10.505	[+]	10.957	[+]	10.858	[+]	11.049	[+]	11.165	[+]	11.864	[+]	10.061	[+]	10.16	[+]	11.477	[+]	10.882	[+]	10.808	[+]	10.825	[+]	10.737	[+]
THC0290_T_0274	1	395326	28	1022	SM1	0.785072	SigA	0.999667	60;278;500	THC0290_0324;THC0290_0325;THC0290_N_0236	NA;NA;NA	Hypothetical protein;Hypothetical protein;new transcription segment	NA;NA;NA	TTAaggacgaattagttggctatTGTCAAAATGGTCAGTACATTTGTGacgaaataggttt	[~]	10.936	[~]	11.038	[~]	11.033	[~]	11.135	[~]	11.938	[~]	11.725	[~]	11.726	[+]	13.182	[+]	12.494	[+]	12.907	[~]	10.965	[~]	11.252	[+]	12.844	[+]	13.148	[+]	12.631	[+]	12.871	[+]	13.139	[+]
THC0290_T_0275	1	395372	5	1023	SM1	0.672776	SigA	0.983339	14;232;454	THC0290_0324;THC0290_0325;THC0290_N_0236	NA;NA;NA	Hypothetical protein;Hypothetical protein;new transcription segment	NA;NA;NA	TGACGaaataggtttgggtgctatcGAAAGATAATTTCGCTATATTTATAaaaattttcaa	[~]	10.793	[~]	10.93	[~]	10.997	[~]	11.022	[~]	11.798	[~]	11.538	[~]	11.721	[+]	13.069	[+]	12.494	[+]	12.751	[~]	10.815	[~]	11.251	[+]	12.783	[+]	13.148	[+]	12.631	[+]	12.725	[+]	13.139	[+]
THC0290_T_0276	1	395947	9	1473	NA	0.918027	NA	0.998001	-29	THC0290_0326	mvaK	Mevalonate kinase	THC0290_v2_0338	taaaataattttcaaatatttatgaaaggaccatTATTTTACTCAAAAATATTACTTttcg	[-]	11.404	[-]	11.344	[-]	11.341	[-]	11.409	[-]	11.839	[-]	11.894	[-]	11.676	[-]	12.354	[-]	11.872	[-]	11.788	[-]	11.244	[-]	11.32	[-]	12.322	[-]	12.663	[-]	12.582	[-]	12.689	[-]	12.356	[-]
THC0290_T_0277	-1	397779	4	1174	NA	0.438854	NA	-1	-3	THC0290_N_0238	NA	new transcription segment	NA	agctcctaaaaatttataattttagcaatgctttTCCGTTTATTAAtaccgagggatttat	[+]	6.492	[+]	6.675	[+]	6.745	[+]	6.579	[+]	6.681	[+]	6.767	[+]	6.407	[+]	6.777	[+]	7.244	[+]	7.421	[+]	6.715	[+]	6.85	[+]	9.295	[+]	8.69	[+]	8.289	[+]	8.192	[+]	9.2	[+]
THC0290_T_0278	1	397942	79	736	SM1	0.974009	SigA	1	15	THC0290_0328	NA	Pseudouridylate synthase	THC0290_v2_0340	TATCAgggctaaaaataaaaaatatTAACTCTTAAAACACTATCTTTGCAcaaattacaga	[+]	11.757	[+]	11.601	[+]	11.668	[+]	11.587	[+]	11.974	[+]	12.504	[+]	12.308	[~]	11.579	[+]	12.685	[+]	12.998	[+]	11.737	[+]	11.545	[+]	12.977	[+]	12.733	[+]	12.537	[+]	12.27	[+]	13.771	[+]
THC0290_T_0279	-1	400179	3	950	SM1	0.612129	SigA	0.952682	80;425	THC0290_0330;THC0290_N_0241	NA;NA	Putative transcriptional regulator;new transcription segment	THC0290_v2_0342;NA	tgactgcattactagcacTTCTTTGTTTTTTTCTATCTTTACAcatttatattgattgttt	[+]	8.395	[+]	8.565	[+]	8.385	[+]	8.355	[+]	8.654	[+]	8.984	[+]	8.492	[+]	9.613	[+]	9.696	[+]	11.068	[+]	8.437	[+]	8.591	[+]	12.047	[+]	10.907	[+]	9.982	[+]	9.892	[+]	10.903	[+]
THC0290_T_0280	1	400565	26	1114	SM1	0.866711	SigA	0.999334	1;175	THC0290_N_0243;THC0290_0332	NA;NA	new transcription segment;Protein of unknown function precursor, putative adhesin	NA;THC0290_v2_0344	TTaatcgataatattttttgtaAGCTTCAAAATGCTATAATTTTGTAtgctagatctgttt	[+]	8.255	[+]	8.265	[+]	8.391	[+]	8.565	[+]	9.019	[+]	9.244	[+]	9.467	[+]	10.37	[+]	10.87	[+]	10.638	[+]	8.84	[+]	8.834	[+]	12.941	[+]	12.892	[+]	13.13	[+]	13.106	[+]	12.864	[+]
THC0290_T_0281	-1	412238	24	312	NA	0.90903	NA	0.997001	NA	NA	NA	NA	NA	gatgccaatatgacctcgAAAGAtccactaggatttGTAGATACAAAAAAATACGCTGATC	[~]	13.274	[~]	13.183	[~]	13.183	[~]	13.331	[~]	13.348	[~]	13.085	[~]	13.305	[~]	12.842	[~]	13.216	[~]	12.941	[~]	13.336	[~]	13.268	[~]	11.522	[~]	11.808	[~]	12.119	[~]	12.246	[~]	11.97	[~]
THC0290_T_0282	-1	413656	23	1709	SM1	0.955015	SigA	1	17	THC0290_0336	fbaA	Fructose-bisphosphate aldolase	THC0290_v2_0348	ATTttggtataaactatccgttcTAAAAGTTAAATTAGTAATTTTGTAaatcttaaaaaaa	[+]	12.801	[+]	12.577	[+]	12.671	[+]	12.72	[+]	12.678	[+]	12.715	[+]	12.716	[+]	11.791	[+]	12.765	[+]	12.945	[+]	12.798	[+]	12.698	[+]	12.018	[+]	11.762	[+]	11.774	[+]	11.936	[+]	11.407	[+]
THC0290_T_0283	-1	416228	9	812	SM1	0.948017	SigA	1	16	THC0290_0337	NA	Probable outer membrane lipoprotein precursor	THC0290_v2_0349	TATAagttttatttggtttctagtAACCATAAAAAAGTGTATTTTTGAAataaatttcaga	[+]	9.328	[+]	9.333	[+]	9.349	[+]	9.365	[+]	9.493	[+]	10.301	[+]	9.282	[+]	9.491	[+]	9.605	[+]	10.689	[+]	9.262	[+]	9.33	[+]	10.714	[+]	9.546	[+]	8.821	[+]	8.883	[+]	10.288	[+]
THC0290_T_0284	-1	418449	28	482	SM3	0.55948	SigA	0.998334	12	THC0290_0340	ubiE	Ubiquinone/menaquinone biosynthesis methyltransferase UbiE	THC0290_v2_0352	cctataatacaccatttTctaaacattcggaATTTAGTTTTATATTTGCtaaaatattttt	[+]	10.356	[+]	10.368	[+]	10.159	[+]	10.236	[+]	10.595	[+]	10.702	[+]	10.437	[+]	11.372	[+]	10.661	[+]	10.879	[+]	10.19	[+]	10.283	[+]	10.269	[~]	10.324	[~]	9.352	[+]	9.518	[+]	10.969	[+]
THC0290_T_0285	1	418604	143	1003	SM3	0.89137	SigA	0.997001	1	THC0290_N_0248	NA	new transcription segment	NA	accacatatctggtaTTGtgtgttttaattTGTTTGTGTAAGTTTATaatctaataaagtt	[+]	9.15	[+]	9.327	[+]	10.614	[+]	10.854	[+]	12.297	[+]	13.423	[+]	13.981	[+]	14.693	[+]	14.698	[+]	14.821	[+]	10.343	[+]	10.546	[+]	12.531	[+]	12.492	[+]	12.397	[+]	12.17	[+]	13.29	[+]
THC0290_T_0286	-1	419963	5	1497	SM1	0.993669	SigA	0.999	14;343	THC0290_0342;THC0290_0341	NA;dfrA	Probable transmembrane protein;Dihydrofolate reductase	NA;THC0290_v2_0353	TTTTattttttttgtcaaatatttTTCCAAAAAAAAAATTATCTTTAGCcataatttaaat	[+]	10.106	[+]	10.196	[+]	10.46	[+]	10.364	[+]	10.083	[+]	10.089	[+]	9.209	[+]	9.677	[+]	9.463	[+]	9.368	[+]	10.371	[+]	10.623	[+]	9.469	[~]	9.541	[~]	8.086	[+]	8.592	[~]	9.496	[+]
THC0290_T_0287	-1	423830	11	1641	NA	0.549817	NA	0.989337	-3	THC0290_0345	NA	Protein of unknown function	THC0290_v2_0357	aaatatagattttataatttctaaaatctaaaatCTAAGATCTAAAGATGAGTTTAGTaaa	[+]	12.266	[+]	12.217	[+]	11.734	[+]	11.617	[+]	11.313	[+]	11.487	[+]	11.317	[~]	7.391	[~]	10.667	[~]	10.804	[+]	11.957	[+]	11.476	[~]	10.121	[+]	10.172	[~]	9.937	[+]	10.08	[~]	10.578	[~]
THC0290_T_0288	-1	424019	36	1853	SM2	0.499167	SigA	0.725092	0;186	THC0290_N_0251;THC0290_0345	NA;NA	new transcription segment;Protein of unknown function	NA;THC0290_v2_0357	ttttatttaaggtTTTtttgaagccaaaAGTTTTTGTTACTTTGCAAACCATAtacctgct	[+]	9.902	[+]	9.761	[+]	9.338	[+]	9.155	[+]	8.909	[+]	9.277	[+]	9.194	[+]	7.188	[~]	9.305	[+]	10.047	[+]	9.345	[+]	9.072	[~]	8.612	[~]	8.106	[~]	8.18	[~]	8.086	[+]	9.057	[+]
THC0290_T_0289	-1	426010	134	1416	SM1	0.961346	SigA	1	20	THC0290_0347	etfB	Electron transfer flavoprotein, beta subunit	THC0290_v2_0359	ATTatgcacgcatagtatattatTTAAATTATTTATCTTATTTTTGTTtttcaatcttaag	[+]	12.283	[+]	12.218	[+]	12.311	[+]	12.349	[+]	12.114	[+]	12.315	[+]	12.059	[+]	10.588	[+]	11.701	[+]	11.904	[+]	12.586	[+]	12.466	[+]	12.071	[+]	12.545	[+]	11.516	[+]	11.423	[+]	12.527	[+]
THC0290_T_0290	1	426164	121	1787	SM1	0.904032	SigA	1	28	THC0290_0348	pdhB	Pyruvate dehydrogenase E1 component, beta subunit	THC0290_v2_0360	ATGaataataattatgcttttatATGATTTTTAATTTTTACTTTTGCTgttcaattttaca	[+]	13.429	[+]	13.377	[+]	13.079	[+]	13.311	[+]	13.186	[+]	12.726	[+]	12.938	[+]	11.982	[+]	12.774	[+]	12.427	[+]	13.165	[+]	13.111	[+]	11.511	[+]	11.917	[+]	11.712	[+]	11.926	[+]	12.101	[+]
THC0290_T_0291	1	427019	3	1480	NA	0.859047	NA	0.996335	151;279	THC0290_N_0254;THC0290_0349	NA;NA	new transcription segment;Probable outer membrane protein precursor	NA;NA	gaagaagcttgGCCTtttgcttcagtggcttcagAAATTACTTATATAGTACAAGAAcgcg	[~]	13.886	[~]	13.763	[~]	13.838	[~]	13.902	[~]	13.813	[+]	13.519	[~]	13.434	[~]	12.798	[~]	13.078	[~]	12.836	[~]	13.765	[~]	13.552	[~]	11.569	[~]	11.259	[~]	11.843	[~]	12.004	[~]	11.35	[~]
THC0290_T_0292	1	430053	25	1806	SM1	0.726091	SigA	1	17	THC0290_0350	ppa	Inorganic diphosphatase	THC0290_v2_0362	AAAaactaacttcaagcgcctaaATTGTAACTTTTTACTACTTTTGCAttctcaaaaaaat	[+]	13.161	[+]	13.303	[+]	12.577	[+]	12.445	[~]	11.728	[+]	11.568	[~]	11.33	[~]	11.545	[~]	11.133	[~]	11.288	[+]	12.655	[+]	12.627	[~]	10.134	[~]	10.171	[~]	10.425	[~]	10.97	[+]	10.414	[~]
THC0290_T_0293	1	430686	10	55	SM5	0.996335	ND	0.996335	1	THC0290_N_0257	NA	new transcription segment	NA	aagagtgttgctttttttataatattatcctaaaaTTAGTAAATTGCAGCAGgttttctgg	[-]	6.379	[-]	6.224	[-]	6.13	[-]	6.176	[-]	6.071	[-]	7.014	[-]	6.383	[-]	8.647	[-]	7.024	[-]	8.185	[-]	6.049	[-]	5.76	[-]	8.324	[~]	9.804	[-]	4.591	[-]	5.306	[-]	6.473	[-]
THC0290_T_0294	-1	431777	3	248	SM1	0.937021	SigA	0.995335	37	THC0290_0351	NA	Putative carboxypeptidase	THC0290_v2_0363	TTAttctaaaaataattggcaaaTTTGAAAAGTTAAATTATTTTAGTAtaagcaacctacg	[~]	10.935	[+]	11.158	[+]	10.684	[+]	10.909	[+]	11.385	[+]	11.317	[~]	11.006	[~]	10.412	[~]	10.976	[+]	10.964	[+]	10.915	[+]	11.201	[+]	10.9	[+]	10.801	[~]	10.335	[~]	10.3	[+]	11.116	[+]
THC0290_T_0295	-1	433006	4	1488	NA	0.886038	NA	0.967344	NA	NA	NA	NA	NA	gcatgggattaGCCGttttgggcccagacgtaaaCGAATCATTTTACAAATTTACGGtcaa	[~]	10.897	[~]	10.849	[~]	10.806	[~]	10.88	[~]	11.362	[~]	10.946	[~]	11.501	[~]	9.665	[~]	11.042	[~]	10.702	[~]	11.225	[~]	10.974	[~]	9.611	[~]	7.928	[~]	10.338	[~]	10.468	[~]	8.519	[~]
THC0290_T_0296	-1	433740	4	1417	NA	0.875375	NA	1	NA	NA	NA	NA	NA	attattaaaaatggatttcttaggactaaaaaccCTAACCTTAATAAAAGACACTGTAAaa	[~]	10.105	[~]	10	[~]	9.982	[~]	10.023	[~]	10.191	[-]	9.671	[~]	10.213	[~]	7.249	[~]	10.299	[-]	9.69	[~]	10.178	[~]	10.14	[-]	8.793	[-]	8.494	[~]	9.786	[~]	9.722	[~]	8.917	[-]
THC0290_T_0297	-1	433778	10	250	NA	0.485172	NA	0.986671	NA	NA	NA	NA	NA	gttacccaatttgacaactccgttgccgaaagtgcaGGATTATtaaaaatggatttcttag	[~]	10.536	[~]	10.222	[~]	10.018	[~]	10.076	[~]	10.343	[-]	9.923	[~]	10.451	[~]	7.554	[~]	10.304	[~]	9.844	[~]	10.268	[~]	10.16	[-]	8.893	[~]	9.071	[~]	10.28	[~]	9.737	[~]	9.515	[~]
THC0290_T_0298	-1	435775	3	48	NA	0.960347	NA	0.999667	NA	NA	NA	NA	NA	caacgactcgttgttttttagaattaataaaaagaGAAGCTTTTACCAAAGAAGAACTCGa	[~]	10.566	[~]	10.476	[~]	10.283	[~]	10.301	[~]	10.765	[~]	10.717	[~]	10.913	[~]	9.961	[~]	11.128	[~]	10.77	[~]	10.459	[~]	10.503	[~]	10.079	[~]	9.713	[~]	10.169	[~]	10.192	[~]	8.631	[~]
THC0290_T_0299	-1	436424	43	1201	SM1	0.584139	SigA	1	1;67	THC0290_N_0258;THC0290_0352	NA;dnaE/dnaQ	new transcription segment;Probable DNA polymerase III, alpha and epsilon subunits	NA;THC0290_v2_0364	TGTtaataactaaaattgacaaaCAACTACATAAAATGTATTTTTGTTtcaataactatta	[+]	10.413	[+]	10.259	[+]	9.92	[+]	9.946	[+]	10.219	[+]	11.399	[+]	10.487	[+]	9.57	[+]	10.534	[+]	11.375	[+]	10.251	[+]	10.154	[+]	11.65	[+]	10.708	[+]	10.07	[+]	9.917	[+]	10.644	[+]
THC0290_T_0300	-1	438723	528	841	SM1	0.977341	SigA	1	19	THC0290_0354	rpbA	Putative RNA-binding protein RbpA	THC0290_v2_0366	AAAagcttaacatcatgcaatttAGAATATTAATAACTTACCTTTGTActaatataataaa	[+]	13.426	[+]	13.303	[+]	13.119	[+]	13.164	[+]	13.074	[+]	13.723	[+]	13.432	[+]	12.856	[+]	14.055	[+]	14.343	[+]	13.359	[+]	12.958	[+]	15.015	[+]	15.063	[+]	13.836	[+]	13.75	[+]	15.797	[+]
THC0290_T_0301	-1	439702	5	1550	SM1	0.993336	SigA	1	26	THC0290_0355	NA	Probable lipoprotein precursor	NA	ATTtttactgtttattagttttCTAATTGTAATCGGTTATTTTTGTAgctattaattaagt	[+]	10.302	[+]	10.347	[+]	10.734	[+]	10.571	[+]	9.991	[+]	10.842	[+]	9.784	[+]	7.419	[+]	10.057	[+]	10.637	[+]	10.878	[+]	10.746	[+]	10.977	[+]	10.685	[+]	9.643	[+]	9.805	[+]	11.267	[+]
THC0290_T_0302	1	439821	4330	1814	SM2	0.878041	SigA	1	1;43	THC0290_N_0261;THC0290_0356	NA;rpsP	new transcription segment;30S ribosomal protein S16	NA;THC0290_v2_0368	aaaacgaatactttagctttatctatcggaAAAAAATGTATATTTGCACCCTTAAataacg	[+]	15.005	[+]	15.059	[+]	15.479	[+]	15.203	[+]	14.656	[+]	14.776	[+]	14.327	[+]	14.548	[+]	14.497	[+]	14.828	[+]	15.347	[+]	15.629	[+]	13.689	[+]	12.981	[+]	13.749	[+]	14	[+]	13.136	[+]
THC0290_T_0303	1	441895	91	1477	SM1	0.981006	SigA	0.999334	1	THC0290_N_0264	NA	new transcription segment	NA	TTTAggagatgattttttttcgttTTCTGAAAACAGTTATATATTTGCTagaaattacaac	[-]	4.909	[-]	4.862	[-]	4.829	[-]	4.775	[-]	4.958	[+]	6.633	[~]	5.725	[~]	6.594	[~]	5.985	[+]	7.97	[-]	4.861	[-]	4.692	[+]	7.355	[~]	6.274	[+]	5.585	[~]	5.145	[+]	7.763	[+]
THC0290_T_0304	-1	442225	8	1644	NA	0.803732	NA	0.976008	256;289	THC0290_N_0265;THC0290_N_0263	NA;NA	new transcription segment;new transcription segment	NA;NA	aaattagctgaaatgattaCCGAAATCACAAAAGCACAATTACtaacttggcgattaggcg	[~]	12.598	[~]	12.622	[~]	12.791	[~]	12.762	[~]	12.839	[~]	12.679	[~]	13.07	[~]	11.964	[~]	13.196	[~]	12.594	[~]	12.677	[~]	12.728	[~]	12.266	[~]	12.302	[~]	12.719	[~]	12.781	[~]	12.349	[~]
THC0290_T_0305	-1	442523	9	36	NA	0.643452	NA	0.996668	NA	NA	NA	NA	NA	tcttatcgtagaaagaggaatggaaggtttttctacTCCAGAAACACACAACAAATGGTca	[~]	13.589	[~]	13.608	[~]	13.669	[~]	13.849	[~]	13.991	[~]	13.739	[~]	14.31	[~]	12.343	[~]	14.355	[~]	13.696	[~]	13.703	[~]	13.721	[~]	13.215	[~]	13.331	[~]	13.593	[~]	13.676	[~]	13.03	[~]
THC0290_T_0306	-1	443168	136	748	SM1	0.868377	SigA	0.999667	20	THC0290_0359	gcdH	Glutaryl-CoA dehydrogenase	THC0290_v2_0371	ATTcgtgatttttaattcataatTAAACTATCTTTATGTAAATTTGTAtcgatttaaaaaa	[+]	12.643	[+]	12.55	[+]	12.51	[+]	12.675	[+]	12.809	[+]	12.65	[+]	12.951	[+]	11.444	[+]	13.234	[+]	13.005	[+]	12.632	[+]	12.66	[+]	12.437	[+]	12.819	[+]	12.51	[+]	12.62	[+]	13.351	[+]
THC0290_T_0307	-1	443180	14	749	SM1	0.999	SigA	0.999667	32	THC0290_0359	gcdH	Glutaryl-CoA dehydrogenase	THC0290_v2_0371	TTTTTtatggtaattcgtgatttttAATTCATAATTAAACTATCTTTATGtaaatttgtat	[~]	12.183	[~]	11.973	[~]	11.818	[+]	12.087	[+]	12.111	[+]	11.995	[+]	12.39	[+]	10.946	[+]	12.718	[+]	12.633	[~]	12.01	[+]	12.095	[+]	12.083	[+]	12.507	[+]	12.018	[+]	12.171	[+]	13.347	[+]
THC0290_T_0308	-1	444715	4	1303	NA	0.487171	NA	0.963679	338	THC0290_0361	NA	Protein of unknown function	THC0290_v2_0373	acaagaagctatctcactagaccatgagagaatTCAGAACATTAAAGACAAATTACaaaca	[~]	11.989	[~]	12.015	[~]	12.031	[~]	11.766	[~]	11.585	[~]	11.578	[~]	11.567	[~]	11.264	[~]	11.011	[~]	11.494	[~]	11.929	[~]	12.156	[~]	10.584	[~]	10.229	[~]	11.114	[~]	11.049	[~]	10.618	[~]
THC0290_T_0309	-1	445276	23	1312	SM1	0.788737	SigA	0.998001	14	THC0290_0362	NA	Protein of unknown function	THC0290_v2_0374	ATCActttttactaatagctaacaCTAATCACTTTTTATTATCTTTACAcctttataaaaa	[+]	10.848	[+]	10.82	[+]	10.65	[+]	10.489	[+]	10.481	[+]	10.736	[+]	10.679	[+]	10.504	[+]	10.406	[+]	11.086	[+]	10.696	[+]	10.669	[+]	10.589	[+]	10.496	[+]	10.688	[+]	10.833	[+]	10.164	[+]
THC0290_T_0310	-1	445727	9	1190	SM1	0.92969	SigA	1	465	THC0290_0362	NA	Protein of unknown function	THC0290_v2_0374	TTTtgtcgtgatcttttcgacatTCTTAACTTATTTATTAAATTTACTttctatgaaagaa	[~]	9.521	[~]	9.263	[+]	8.868	[+]	8.949	[+]	8.799	[+]	9.029	[+]	8.762	[+]	9.987	[+]	8.868	[+]	9.055	[+]	8.979	[+]	8.933	[+]	9.379	[+]	9.409	[+]	7.83	[+]	8.245	[+]	9.415	[+]
THC0290_T_0311	-1	446802	5	270	SM1	0.488171	SigA	0.92869	14;363	THC0290_0364;THC0290_0363	NA;NA	Probable arsenate reductase (glutaredoxin);Probable drug/metabolite-transporting permease	THC0290_v2_0376;THC0290_v2_0375	ttctataaatttaatcaaatttgtgttttAAATGAAGTTACTTTGCAttttcaattaaaaa	[+]	9.604	[+]	9.588	[+]	9.339	[+]	9.141	[+]	9.394	[+]	9.611	[+]	9.6	[+]	8.809	[+]	9.683	[+]	10.062	[+]	9.102	[+]	9.163	[+]	8.878	[+]	7.885	[+]	8.602	[+]	8.876	[+]	9.072	[+]
THC0290_T_0312	1	446851	3	1008	SM1	0.784738	SigA	0.98967	20;167	THC0290_N_0267;THC0290_0365	NA;NA	new transcription segment;Protein of unknown function	NA;NA	GAAAatgcaaagtaacttcatttaAAACACAAATTTGATTAAATTTATAgaaatatttatg	[+]	8.969	[+]	8.7	[+]	9.675	[+]	9.608	[+]	10.147	[+]	10.633	[+]	10.488	[+]	11.165	[+]	10.941	[+]	11.202	[+]	9.843	[+]	9.927	[+]	11.018	[+]	10.981	[+]	10.544	[+]	10.577	[+]	11.668	[+]
THC0290_T_0313	1	446870	4	1009	SM1	0.994002	SigA	1	1;148	THC0290_N_0267;THC0290_0365	NA;NA	new transcription segment;Protein of unknown function	NA;NA	ATTtaaaacacaaatttgattaaATTTATAGAAATATTTATGTTTGCTgctttgcggatta	[+]	10.226	[+]	9.91	[+]	11.157	[+]	10.732	[+]	11.342	[+]	11.848	[+]	11.748	[+]	12.581	[+]	12.043	[+]	12.351	[+]	11.358	[+]	11.267	[+]	12.419	[+]	12.226	[+]	11.614	[+]	11.733	[+]	12.81	[+]
THC0290_T_0314	1	447646	23	857	SM1	0.765078	SigA	1	15	THC0290_0366	NA	Cys/Met metabolism PLP-dependent enzyme	THC0290_v2_0379	AAAtagttaaacttcataattttGCTAAGAATAAAAAGTAAATTTGCAtcttaaaaactaa	[+]	12.152	[+]	12.023	[+]	12.238	[+]	12.378	[+]	12.716	[+]	12.813	[+]	12.775	[~]	11.528	[~]	12.798	[+]	12.982	[+]	12.212	[+]	12.32	[+]	13.378	[+]	13.278	[+]	12.927	[+]	12.881	[~]	13.479	[+]
THC0290_T_0315	1	448748	31	1649	NA	0.962679	NA	1	62;114	THC0290_N_0270;THC0290_N_0272	NA;NA	new transcription segment;new transcription segment	NA;NA	cccagaagataaaagaAAAGAaataggaattacaGACGATTTAGTAAGACTAAGTGTTGgg	[-]	10.983	[-]	10.949	[-]	10.819	[-]	11.122	[-]	11.291	[-]	11.259	[-]	11.574	[-]	11.837	[-]	12.151	[~]	11.874	[-]	10.793	[-]	10.617	[~]	11.844	[-]	11.777	[-]	11.747	[-]	11.751	[-]	11.25	[~]
THC0290_T_0316	1	453863	20	866	SM1	0.825725	SigA	1	22	THC0290_0370	phoP	Two-component system response regulatory protein involved in phosphate regulation	THC0290_v2_0384	ATTtatgtaatcttgatttttttAGTTTAAAATATATTTACATTTACAtcataaaaaaagc	[+]	10.132	[+]	10.185	[+]	10.159	[+]	10.002	[+]	10.104	[+]	10.638	[+]	10.445	[+]	10.983	[+]	11.091	[+]	11.078	[+]	10.054	[+]	10.148	[+]	11.686	[+]	12.204	[+]	10.873	[+]	11.13	[+]	12.811	[+]
THC0290_T_0317	1	455736	8	767	SM1	0.972009	SigA	0.987671	21	THC0290_0372	oprP	Probable phosphate-selective porin precursor	NA	GTTAatatttgcttaacaatttaATAACATTACTAATCCATCTTTGTGgcttaaaacaaga	[~]	9.342	[~]	9.374	[+]	10.018	[+]	10.671	[+]	12.106	[+]	12.346	[+]	12.363	[+]	12.267	[+]	12.058	[+]	11.7	[~]	9.313	[~]	9.79	[+]	11.557	[+]	12.085	[+]	11.19	[+]	11.509	[+]	12.77	[+]
THC0290_T_0318	-1	456323	4	297	SM1	0.894702	SigA	0.999334	NA	NA	NA	NA	NA	TTTaacggaatttcgtattttgtCATAAAATTAGCTTCTAACTTTGCTcctaaatcacgtt	[~]	4.141	[~]	4.152	[~]	4.075	[~]	4.117	[~]	4.137	[-]	4.721	[~]	4.078	[-]	7.457	[+]	5.307	[~]	5.602	[~]	4.126	[~]	4.077	[+]	5.311	[+]	6.056	[~]	4.64	[~]	4.675	[+]	6.403	[+]
THC0290_T_0319	1	457812	5	1600	NA	0.834055	NA	0.999667	136;226	THC0290_N_0274;THC0290_0374	NA;pstC	new transcription segment;ABC-type phosphate-transport system, permease component PstC	NA;THC0290_v2_0388	gccaatagccctgctcttttagcaacggaagaaaCTATTAGAAATAAAACATACCCAatca	[~]	9.637	[~]	9.841	[~]	11.031	[~]	11.724	[~]	13.349	[~]	13.738	[~]	13.803	[~]	13.222	[~]	14.579	[~]	13.821	[~]	10.382	[~]	10.502	[~]	12.567	[~]	11.856	[~]	12.746	[~]	13.149	[~]	11.802	[~]
THC0290_T_0320	-1	463092	4	1563	SM3	0.68144	SigA	0.818061	293	THC0290_0378	NA	Probable glycosyl transferase	THC0290_v2_0392	cggcagttaagtttatTActaatttcgagaaaATTTGCATAGATTTAGccatcgaaaagaa	[~]	6.557	[~]	6.697	[~]	6.715	[~]	6.962	[~]	7.411	[~]	7.433	[~]	7.902	[-]	7.73	[~]	7.85	[-]	6.646	[~]	6.708	[~]	6.889	[-]	7.957	[-]	8.453	[-]	7.062	[~]	7.644	[-]	8.149	[-]
THC0290_T_0321	1	463763	22	1572	SM1	0.990003	SigA	1	19	THC0290_0380	trmB	tRNA (guanine-N(7)-)-methyltransferase	THC0290_v2_0394	AAACATtatcataagtttatatctatTGATTTATATTTTCTTATTTTTGCCaaaatattaa	[+]	10.557	[+]	10.512	[+]	9.92	[+]	9.985	[+]	9.776	[+]	10.566	[+]	9.87	[+]	9.682	[+]	10.512	[+]	11.409	[+]	9.996	[+]	10.048	[+]	10.845	[+]	10.497	[+]	9.953	[+]	9.951	[+]	11.263	[+]
THC0290_T_0322	1	466183	84	1859	SM1	0.648117	SigA	1	1;82	THC0290_N_0278;THC0290_0384	NA;actA	new transcription segment;Alternative complex III, protein A	NA;THC0290_v2_0398	AAGatatatttaaggttttgagaATAGTACATAAGTCGTATTTTTGTCgaagttttttaaa	[+]	13.071	[+]	12.731	[+]	12.495	[+]	12.641	[+]	11.96	[+]	12.506	[+]	11.589	[+]	9.867	[+]	10.836	[+]	11.39	[+]	12.286	[+]	11.993	[+]	10.892	[+]	10.223	[+]	10.979	[+]	11.283	[+]	10.869	[+]
THC0290_T_0323	1	467523	35	1645	NA	0.727091	NA	0.999667	65;154	THC0290_N_0279;THC0290_0385	NA;actB	new transcription segment;Alternative complex III, protein B precursor	NA;THC0290_v2_0399	agaaggaaatgattactacaaaaaaattcataccGAACTTTCTAAAAAATATGGTGTAGac	[+]	14.964	[~]	15.054	[+]	15.338	[~]	14.742	[+]	14.44	[+]	14.391	[+]	14.035	[~]	12.532	[+]	12.789	[+]	12.944	[~]	14.492	[~]	14.395	[+]	12.38	[+]	15.116	[+]	13.763	[+]	13.387	[+]	12.968	[+]
THC0290_T_0324	1	468392	15	1269	NA	0.829723	NA	0.997334	NA	NA	NA	NA	NA	tttagatgcttttcaaacggtttatggtgagagaGCTTTGGCAGAATATGATTTTTCAAaa	[~]	14.87	[~]	14.842	[~]	14.337	[~]	14.471	[~]	13.867	[~]	13.699	[~]	13.542	[~]	12.952	[~]	12.594	[~]	12.116	[~]	14.347	[~]	14.077	[+]	11.554	[+]	11.001	[~]	12.447	[~]	12.549	[~]	12.143	[~]
THC0290_T_0325	1	469034	19	290	NA	0.530157	NA	0.983672	NA	NA	NA	NA	NA	tgagactgctgctgttgcgaatattgcagttgcaACACCTCATTATTTAGaatcttgggga	[~]	14.71	[~]	14.535	[~]	14.119	[~]	14.243	[~]	13.589	[~]	13.298	[~]	12.962	[~]	12.864	[~]	12.109	[~]	11.489	[~]	14.086	[~]	13.76	[~]	11.164	[~]	10.614	[~]	12.237	[~]	12.315	[~]	11.908	[~]
THC0290_T_0326	1	469746	98	120	NA	0.598134	NA	0.790403	NA	NA	NA	NA	NA	attgctaaagaagacggagaacatgagtttgcttgTGTTCAGTTGCAAAGAACATTAAtgg	[~]	14.13	[~]	14.06	[~]	13.579	[~]	13.78	[~]	13.113	[~]	12.578	[~]	12.788	[~]	12.377	[~]	11.788	[~]	11.262	[~]	13.651	[~]	13.247	[~]	10.6	[~]	10.401	[~]	11.87	[~]	12.018	[~]	11.567	[~]
THC0290_T_0327	1	471722	29	1237	NA	0.803732	NA	0.995668	491	THC0290_0387	actD	Alternative complex III, protein D	NA	tatcacaattcaacacATCGaattgatgaatattGTCATCATGATCACTGGTTCTATTGtg	[~]	14.385	[~]	14.045	[~]	13.491	[~]	13.842	[~]	13.283	[+]	12.862	[~]	13.161	[~]	13.221	[~]	12.036	[~]	11.411	[~]	13.387	[~]	13.086	[~]	10.549	[~]	9.946	[~]	11.856	[~]	12.096	[~]	11.573	[~]
THC0290_T_0328	1	472039	31	1319	NA	0.888037	NA	0.975342	174	THC0290_0387	actD	Alternative complex III, protein D	NA	gtgattacttgccatcatcttggacaatgttccaGCCAACATTTGTAGATATAGGTAtttt	[~]	14.708	[~]	14.441	[~]	14.135	[~]	14.182	[~]	13.763	[~]	13.536	[~]	13.443	[~]	13.724	[~]	12.65	[~]	12.079	[~]	13.997	[~]	13.953	[~]	11.236	[~]	10.734	[~]	12.332	[~]	12.573	[~]	12.23	[~]
THC0290_T_0329	1	473416	61	251	NA	0.904032	NA	1	NA	NA	NA	NA	NA	ttttaggagcaTTAggtataggatatggttttttCACTGCCCCTAAAAATACACAAGatgt	[~]	14.423	[~]	14.015	[~]	13.451	[~]	13.848	[~]	13.178	[~]	12.863	[~]	12.795	[~]	12.83	[~]	11.511	[~]	11.301	[~]	13.412	[~]	13.173	[~]	10.97	[~]	10.083	[~]	11.73	[~]	11.965	[~]	11.198	[~]
THC0290_T_0330	1	474908	12	1604	NA	0.755415	NA	0.993002	NA	NA	NA	NA	NA	gacacaaattggcGcaaataaaaatagttctcaaatAGCAGATAATAAGGATAATAATCtt	[~]	13.947	[~]	13.748	[~]	13.303	[~]	13.52	[~]	12.909	[-]	12.504	[~]	12.736	[~]	12.975	[-]	11.292	[-]	10.69	[~]	13.078	[~]	12.936	[~]	10.312	[-]	9.729	[~]	11.657	[~]	11.634	[~]	11.39	[-]
THC0290_T_0331	1	476255	12	632	NA	0.968677	NA	0.999	NA	NA	NA	NA	NA	actttcttttaGGAGataaattagcaccaggaggTGTTATGCGTAACGATATTTATTtagc	[~]	14.299	[~]	14.291	[~]	13.87	[~]	14.09	[~]	13.508	[~]	13.132	[~]	13.449	[~]	13.11	[~]	12.176	[~]	11.428	[~]	13.865	[~]	13.431	[~]	10.721	[~]	10.353	[~]	12.301	[~]	12.097	[~]	11.966	[~]
THC0290_T_0332	1	477859	7	975	SM1	0.819394	SigA	0.985005	13	THC0290_0392	NA	Protein of unknown function precursor	NA	TTCttagtgaaaggcatttttagTTTAAAGTATTTTACTAACTTTAATccataaatatata	[+]	9.581	[+]	9.206	[+]	9.052	[+]	9.001	[+]	9.125	[+]	9.599	[+]	9.836	[+]	10.722	[+]	10.764	[+]	10.77	[+]	9.081	[+]	8.896	[+]	10.971	[+]	10.547	[+]	9.525	[+]	9.507	[+]	11.398	[+]
THC0290_T_0333	1	479610	4	1619	SM5	0.983672	ND	0.983672	19	THC0290_0394	NA	Protein of unknown function precursor, putative S46 family serine protease	NA	tgattttactatttTatttccaataaaatcaaaaATAGTATCTTGCAACACtataaattat	[+]	10.8	[+]	10.666	[+]	10.231	[+]	10.302	[+]	9.855	[+]	9.373	[+]	9.643	[+]	8.883	[+]	9.381	[+]	8.73	[+]	10.431	[+]	10.462	[+]	8.934	[+]	9.486	[+]	9.207	[+]	9.387	[+]	9.664	[+]
THC0290_T_0334	1	481942	11268	680	SM1	0.991336	SigA	1	1;316	THC0290_N_0284;THC0290_N_0285	NA;NA	new transcription segment;new transcription segment	NA;NA	AAAaagtaaaaaaaaagttttacCTATCAAAAAATTTATATCTTTGCAaagaattaataat	[+]	14.976	[+]	14.886	[+]	15.622	[+]	15.794	[+]	15.874	[+]	15.864	[+]	15.746	[+]	15.378	[+]	16.269	[+]	15.97	[+]	15.207	[+]	15.464	[+]	15.943	[+]	15.847	[+]	15.823	[+]	15.422	[+]	15.656	[+]
THC0290_T_0335	1	482937	7	1028	SM1	0.997334	SigA	1	NA	NA	NA	NA	NA	TTTttatttgagttgttaataaaTTAAAAATAAGATCTTAATTTTATTacgatcattgttt	[+]	7.344	[~]	7.198	[+]	7.869	[+]	7.721	[+]	8.061	[+]	8.374	[+]	8.22	[+]	8.437	[+]	9.192	[+]	9.032	[+]	7.721	[+]	7.705	[+]	9.118	[+]	9.103	[+]	8.882	[+]	8.866	[+]	9.524	[+]
THC0290_T_0336	-1	483469	6191	314	SM1	0.53049	SigA	0.748084	-40;0;88	THC0290_N_0287;THC0290_tRNA_0008;THC0290_N_0286	NA;NA;NA	new transcription segment;transfer RNA-Leu;new transcription segment	NA;NA;NA	tttcgctctataccAAACAAAATTATATTTAATTTTGGAaaaacaaaactgcttgggtggt	[-]	9.171	[-]	8.809	[-]	8.925	[-]	8.821	[-]	9.34	[~]	11.436	[-]	10.568	[~]	13.24	[~]	12.798	[~]	13.301	[~]	9.701	[~]	9.268	[~]	13.883	[~]	12.96	[~]	11.766	[~]	11.66	[~]	13.432	[~]
THC0290_T_0337	-1	483585	1381	822	NA	0.690437	NA	0.8997	-42;0;76;116;204	THC0290_N_0288;THC0290_tRNA_0009;THC0290_N_0287;THC0290_tRNA_0008;THC0290_N_0286	NA;NA;NA;NA;NA	new transcription segment;transfer RNA-Gly;new transcription segment;transfer RNA-Leu;new transcription segment	NA;NA;NA;NA;NA	tttgccctcgcaatacagcaacgtattgatgctctttaaaaaaatgaaatgcgaaaatagc	[+]	10.753	[+]	10.864	[+]	11.137	[+]	11.223	[+]	11.664	[+]	13.406	[+]	12.865	[+]	13.692	[+]	13.398	[+]	14.23	[+]	11.292	[+]	10.842	[+]	14.178	[+]	12.699	[+]	12.517	[+]	12.474	[+]	12.776	[+]
THC0290_T_0338	-1	486346	3	1438	SM2	0.893036	SigA	0.995668	22	THC0290_0397	mutS	DNA mismatch repair protein MutS	THC0290_v2_0412	gttgttaaatttttgaccgtatatttaggtAAAATAAGTAATTTCGTAACCTATTaattaa	[+]	10.677	[+]	10.616	[+]	11.086	[+]	11.068	[+]	11.399	[+]	11.084	[+]	10.709	[+]	10.585	[+]	10.459	[+]	10.019	[+]	11.203	[+]	11.187	[+]	8.205	[+]	8.58	[+]	9.046	[+]	9.24	[+]	9.739	[+]
THC0290_T_0339	1	486449	43	792	SM1	0.981673	SigA	1	25	THC0290_0398	NA	Protein of unknown function precursor	NA	TTTtagataaaaaaagtattgtaATTCGAATTTATTTTTACATTTGCTatgttaaactata	[+]	13.492	[+]	13.464	[+]	14.148	[+]	14.332	[+]	14.807	[+]	15.469	[+]	14.805	[+]	14.316	[+]	14.236	[+]	14.346	[+]	14.18	[+]	14.226	[+]	15.156	[+]	14.927	[+]	14.606	[+]	14.984	[+]	15.513	[+]
THC0290_T_0340	1	488797	11	1580	SM1	0.916028	SigA	0.999667	1;71	THC0290_N_0291;THC0290_0401	NA;sppA	new transcription segment;Protease IV (signal peptide peptidase)	NA;THC0290_v2_0416	ATAaagcaaattaactaaaaagaAATTTACAATCTTATTATATTTGCCaagtgttaataac	[+]	9.17	[+]	9.159	[+]	9.01	[+]	8.623	[+]	8.854	[+]	8.216	[+]	8.553	[+]	7.334	[+]	8.49	[+]	8.685	[+]	8.772	[+]	9.04	[+]	8.609	[+]	9.309	[+]	8.914	[+]	9.147	[+]	10.048	[+]
THC0290_T_0341	1	490781	14	173	SM4	1	Sig54	1	19	THC0290_0402	NA	Outer membrane protein precursor, AsmA family	THC0290_v2_0417	TTAtttttgtgaaaaaaaaagtTAGGCAAGATATTTGCTTTAcgctatctagaattaaatt	[+]	11.4	[+]	11.277	[+]	11.546	[+]	11.479	[+]	11.484	[+]	11.484	[+]	11.133	[+]	11.109	[+]	10.358	[+]	10.548	[+]	11.428	[+]	11.54	[+]	11.232	[+]	11.372	[+]	11.111	[+]	11.293	[+]	11.933	[+]
THC0290_T_0342	1	493339	5	1249	NA	0.977674	NA	1	44	THC0290_N_0293	NA	new transcription segment	NA	tgcagacacaacaaaaacaaaagatcctaaaaaaGAGGCTATAAAAAATGCCGCTGGAGat	[-]	9.896	[-]	9.58	[-]	10.042	[-]	10.185	[-]	10.339	[-]	10.764	[-]	10.91	[~]	10.795	[-]	10.368	[-]	10.061	[-]	10.314	[-]	10.032	[-]	10.67	[-]	10.029	[-]	10.808	[-]	11.013	[-]	9.64	[-]
THC0290_T_0343	1	494499	12	960	SM1	0.577807	SigA	0.999	28	THC0290_0404	NA	Protein of unknown function	THC0290_v2_0419	AGATTtttgtatttaaacttcaaaaATCTTTTTTTTTTACTATTTTAGCGtaaagataaac	[+]	8.231	[+]	8.249	[+]	8.335	[+]	8.35	[+]	7.947	[+]	8.041	[+]	7.099	[~]	7.944	[+]	8.316	[+]	8.578	[+]	8.452	[+]	8.566	[+]	9.655	[+]	10.088	[+]	7.745	[+]	7.959	[+]	11.16	[+]
THC0290_T_0344	1	494964	3	1483	NA	0.974675	NA	1	196	THC0290_0405	NA	Protein of unknown function	NA	tttgcaagtaaatttcacgcatcaattacaaataAAATGCCATTAAAAATACATCCTttaa	[~]	9.78	[~]	9.651	[~]	10.254	[~]	10.036	[~]	9.629	[+]	9.957	[~]	8.611	[~]	9.519	[~]	8.505	[~]	8.663	[~]	10.552	[~]	10.366	[~]	9.083	[-]	8.37	[~]	7.777	[~]	8.242	[-]	7.786	[~]
THC0290_T_0345	-1	497946	26	1508	SM1	0.958347	SigA	1	13	THC0290_0406	kdtA	3-deoxy-D-manno-octulosonic-acid transferase	THC0290_v2_0421	TTTagatttatacttattatataATGTAAAGAAAAATGTATTTTTGAAatcaaattttatt	[+]	8.897	[+]	8.62	[+]	8.772	[+]	8.544	[+]	8.324	[+]	9.296	[+]	8.052	[+]	7.801	[+]	7.867	[+]	8.696	[+]	8.893	[+]	8.505	[+]	8.21	[+]	6.033	[+]	6.165	[+]	7.56	[~]	6.004	[+]
THC0290_T_0346	1	498013	16	1333	SM1	0.984005	SigA	1	1;66	THC0290_N_0296;THC0290_0407	NA;porR	new transcription segment;PorR protein, probably involved in biosynthesis of cell surface polysaccharide	NA;THC0290_v2_0422	TTTCtttacattatataataagtaTAAATCTAAAATTCCTATTTTTGTTctaaattctaaa	[+]	12.09	[+]	12.096	[+]	12.024	[+]	12.068	[+]	11.888	[+]	12.237	[+]	11.955	[+]	11.345	[+]	11.898	[+]	12.33	[+]	12.326	[+]	12.162	[+]	11.834	[+]	11.3	[+]	11.221	[+]	11.318	[+]	11.52	[+]
THC0290_T_0347	-1	498813	4	914	SM2	0.993336	SigA	0.999667	NA	NA	NA	NA	NA	gcctcttgacgggcTTTGttataggtatctAAAAGTGGTAATTTTGCATTAAGAActgctg	[~]	4.178	[~]	3.924	[~]	3.953	[~]	4.109	[~]	4.492	[~]	4.622	[~]	5.575	[~]	7.542	[+]	7.549	[+]	7.441	[~]	4.268	[~]	4.148	[+]	8.989	[+]	9.001	[+]	6.217	[+]	6.489	[+]	10.061	[+]
THC0290_T_0348	-1	500881	399	713	SM1	0.846051	SigA	0.960013	24;282;316	THC0290_0409;THC0290_N_0300;THC0290_N_0298	NA;NA;NA	Hypothetical lipoprotein precursor;new transcription segment;new transcription segment	NA;NA;NA	AAAATaatattgaaagtgtttttttGTATTATTAATTTTGTAACTTGGCTaataataaatc	[+]	13.309	[+]	13.251	[+]	14.007	[+]	13.913	[+]	14.234	[+]	15.663	[+]	13.937	[+]	14.631	[+]	14.789	[+]	15.444	[+]	14.23	[+]	14.189	[+]	15.199	[+]	14.071	[+]	13.632	[+]	13.801	[+]	13.81	[+]
THC0290_T_0349	-1	501896	5	1848	SM2	0.786738	SigA	0.963012	-27;15	THC0290_N_0302;THC0290_0410	NA;fabD	new transcription segment;Malonyl CoA-acyl carrier protein transacylase	NA;THC0290_v2_0425	aaaaaaaacactattTTTGcttgagattatAAATTTTCTTACATTATATACTTTAaattaa	[+]	11.571	[+]	11.44	[+]	11.078	[+]	10.962	[+]	10.11	[+]	9.769	[+]	9.824	[+]	7.047	[+]	9.406	[+]	9.632	[+]	11.231	[+]	11.06	[+]	9.919	[+]	9.729	[+]	9.213	[+]	9.316	[+]	10.78	[+]
THC0290_T_0350	-1	501924	29	1849	SM2	0.852049	SigA	1	1;43	THC0290_N_0302;THC0290_0410	NA;fabD	new transcription segment;Malonyl CoA-acyl carrier protein transacylase	NA;THC0290_v2_0425	ctagagaagcctaaaaGTTTgcgcttctaaaAAAAACACTATTTTTGCTTGAGATTataaa	[+]	11.3	[+]	11.256	[+]	11.03	[+]	10.791	[+]	9.978	[+]	9.769	[+]	9.824	[+]	6.972	[+]	9.304	[+]	9.632	[+]	11.179	[+]	10.939	[+]	9.62	[+]	9.316	[+]	8.952	[+]	9.27	[+]	10.464	[+]
THC0290_T_0351	-1	505104	24	322	SM3	0.976341	SigA	0.994668	23	THC0290_0414	aspC1	Probable aspartate transaminase AspC1	THC0290_v2_0429	gcataatatttaaGACGccattgtgcgtcTTTTTTTATATATTTGAacttatattaaacta	[+]	12.786	[+]	12.84	[+]	12.846	[+]	12.594	[~]	11.911	[~]	12.479	[~]	12.247	[~]	10.457	[~]	12.092	[~]	12.576	[+]	12.916	[+]	12.622	[~]	12.125	[+]	12.317	[~]	11.455	[~]	11.2	[+]	13.143	[+]
THC0290_T_0352	-1	505852	4	565	NA	0.67944	NA	0.978674	NA	NA	NA	NA	NA	aggaaacgtgtacaactggcaagtacagcacaatGTTTTACACCATACATATACTAAtatt	[~]	11.277	[~]	11.306	[~]	11.342	[~]	11.443	[~]	11.744	[~]	11.407	[~]	11.803	[~]	12.27	[~]	11.324	[~]	11.409	[~]	11.262	[~]	11.354	[~]	11.37	[~]	11.299	[~]	11.762	[~]	11.89	[~]	11.101	[~]
THC0290_T_0353	-1	506262	4	1112	SM1	0.999334	SigA	0.999667	16	THC0290_0415	NA	Fatty acid desaturase	THC0290_v2_0430	TATTtatctgaattttaacaattaAAATGTTTTAATAATTATCTTTGTAaattatacataa	[+]	11.287	[+]	11.213	[+]	11.221	[+]	11.239	[+]	11.675	[+]	11.408	[+]	11.805	[+]	12.527	[+]	11.523	[+]	11.745	[+]	11.08	[+]	11.336	[+]	12.437	[+]	12.756	[+]	11.901	[+]	11.85	[+]	13.639	[+]
THC0290_T_0354	1	506339	5	877	SM1	0.996668	SigA	0.999334	13	THC0290_0416	gidB	Methyltransferase GidB	THC0290_v2_0431	tAATTGTtaaaattcagataaatattTCGATTGTAAAGTATTACTTTTGTTaaaaaaataa	[+]	9.283	[+]	9.359	[+]	9.62	[+]	9.715	[+]	10.147	[+]	10.438	[+]	9.987	[+]	10.755	[+]	11.081	[+]	11.437	[+]	9.495	[+]	9.591	[+]	11.013	[+]	10.253	[+]	10.041	[+]	10.164	[+]	10.774	[+]
THC0290_T_0355	1	506628	3	139	SM6	0.953682	SigECF	0.953682	354	THC0290_N_0304	NA	new transcription segment	NA	ttccaggtattccgctaGCAATtttgttcccagaAACTCGTTTTTATTTGAtagatgttat	[~]	10.112	[~]	9.997	[~]	10.395	[~]	10.486	[~]	10.956	[+]	10.78	[+]	11.301	[+]	11.388	[~]	11.663	[+]	11.362	[~]	10.252	[~]	10.32	[~]	10.14	[~]	10.317	[+]	10.705	[~]	11.011	[+]	10.816	[+]
THC0290_T_0356	-1	507225	26	1714	NA	0.379207	NA	0.517161	168	THC0290_N_0305	NA	new transcription segment	NA	aagctacggtagctttacaaaatgctgcgggtaaTTTTTATATTAATGATAaaccaacggg	[+]	14.166	[+]	14.246	[+]	14.595	[+]	14.745	[+]	14.842	[+]	15.371	[+]	15.011	[+]	13.393	[+]	15.375	[+]	14.829	[+]	14.814	[+]	14.326	[+]	13.779	[+]	13.041	[+]	13.866	[+]	14.161	[+]	12.959	[+]
THC0290_T_0357	-1	508433	8	1456	NA	0.998334	NA	1	NA	NA	NA	NA	NA	acacatcgtgggaacctatcatttagctgaaaaaTCTCATGTAGAAAAAGCCATCGCAAac	[~]	14.088	[~]	14.225	[~]	14.773	[~]	14.567	[~]	14.643	[~]	14.883	[~]	15.095	[~]	12.455	[~]	15.19	[~]	14.602	[~]	14.573	[~]	14.363	[~]	13.403	[~]	12.574	[~]	13.706	[~]	13.651	[~]	12.722	[~]
THC0290_T_0358	-1	508743	42	1231	SM1	0.951683	SigA	0.995335	1;60	THC0290_N_0306;THC0290_0417	NA;pruA	new transcription segment;1-pyrroline-5-carboxylate dehydrogenase	NA;THC0290_v2_0432	AAAATAatattttgatttagcaaaaATCATTTTTCCTTTGTACTTTTGTGtaaatttttca	[+]	14.411	[+]	14.566	[+]	15.282	[+]	14.753	[+]	15.246	[+]	15.673	[+]	15.343	[+]	12.867	[+]	15.443	[+]	15.567	[+]	15.057	[+]	14.866	[+]	15.114	[+]	14.178	[+]	14.251	[+]	14.195	[+]	15.193	[+]
THC0290_T_0359	-1	509507	4	1726	NA	0.496834	NA	0.847384	NA	NA	NA	NA	NA	tttggcacaatgaaaggtcatttcgaaatgatcaATTTTACCACCACAAAATCATTCaaag	[-]	9.148	[-]	9.258	[-]	9.466	[-]	9.477	[-]	10.222	[-]	11.206	[-]	10.848	[-]	11.272	[-]	10.444	[-]	10.781	[-]	9.389	[-]	9.265	[-]	11.373	[-]	10.962	[-]	9.716	[-]	9.523	[-]	12.141	[-]
THC0290_T_0360	-1	509851	104	971	SM1	0.997001	SigA	1	15	THC0290_0418	apaG	Protein ApaG	THC0290_v2_0434	AAAacaatgcaatcatagctttgCATCTATAAATTTTATAACTTTGTAaaagtagacaaac	[+]	12.101	[+]	11.938	[+]	12.548	[+]	12.232	[+]	12.937	[+]	13.57	[+]	13.345	[+]	13.488	[+]	13.051	[+]	13.447	[+]	12.646	[+]	12.536	[+]	13.825	[+]	13.466	[+]	12.833	[+]	12.316	[+]	15.251	[+]
THC0290_T_0361	1	509860	6	1268	SM3	0.835388	SigA	0.999667	NA	NA	NA	NA	NA	gatgcctcttgtggtTTGaattaccataaCTGTTTGTCTACTTTTACaaagttataaaatt	[+]	6.7	[+]	6.688	[+]	6.184	[+]	6.46	[+]	5.823	[+]	6.769	[+]	7.66	[-]	7.768	[+]	6.17	[~]	7.03	[+]	6.242	[+]	6.167	[~]	8.092	[~]	7.413	[~]	5.538	[~]	6.403	[+]	7.8	[-]
THC0290_T_0362	-1	511186	5	939	NA	0.478507	NA	0.662446	29	THC0290_0419	NA	Protein of unknown function precursor	NA	ctgtttgctttaaaaaacaataaaaacgcacaatTATACGTTCTAAAATTATAtatttact	[~]	9.493	[~]	9.271	[~]	9.05	[~]	8.9	[~]	8.82	[~]	9.2	[~]	8.919	[~]	9.676	[~]	8.965	[~]	9.334	[~]	9.218	[~]	9.144	[+]	10.548	[+]	9.891	[+]	9.783	[+]	9.546	[+]	10.82	[+]
THC0290_T_0363	-1	513829	13	1613	SM1	0.4995	SigA	0.991336	14	THC0290_0422	NA	Protein of unknown function	THC0290_v2_0438	tcacaaggattatatttatccttaaGTTTAAAAAAATAACTACTTTTACGcaaaataatat	[+]	12.133	[+]	12.097	[+]	11.596	[+]	11.535	[+]	11.684	[+]	11.675	[+]	11.644	[+]	12.411	[+]	11.455	[+]	12.245	[+]	11.736	[+]	11.828	[+]	11.585	[+]	11.697	[+]	11.302	[+]	11.519	[+]	11.249	[+]
THC0290_T_0364	-1	514242	24	881	NA	0.726425	NA	0.930023	339;427	THC0290_N_0307;THC0290_0422	NA;NA	new transcription segment;Protein of unknown function	NA;THC0290_v2_0438	aagatgttggaaatgccattcaaaaatataccgaatctcatggttatggtgtggttcgaga	[~]	12.065	[~]	12.057	[~]	11.717	[~]	11.837	[~]	12.162	[~]	12.268	[~]	12.444	[+]	13.348	[+]	13.407	[+]	13.413	[~]	11.83	[~]	11.75	[+]	12.545	[~]	12.399	[~]	12.326	[~]	12.184	[+]	12.791	[+]
THC0290_T_0365	-1	514737	45	556	SM1	0.943352	SigA	1	15	THC0290_0423	map	Methionine aminopeptidase	THC0290_v2_0439	ATAgccaatcctaattaaaaaagATATAAAAAAATCGTTACTTTTGTAatcttaaaactca	[+]	12.026	[+]	11.958	[+]	11.816	[+]	11.74	[+]	11.842	[+]	12.519	[+]	11.814	[+]	12.051	[+]	12.134	[+]	13.066	[+]	12.016	[+]	11.796	[+]	13.053	[~]	12.713	[~]	12.169	[~]	12.004	[+]	12.995	[+]
THC0290_T_0366	-1	518187	3	993	NA	0.587471	NA	0.841719	NA	NA	NA	NA	NA	tagcaatgaattagagGATCattcactcaattatTCAAACATTTCATTAGAAACAGACAac	[~]	9.265	[~]	9.223	[~]	9.118	[~]	9.111	[~]	9.353	[~]	9.072	[~]	9.542	[~]	10.144	[~]	10.474	[+]	11.281	[~]	9.099	[~]	8.992	[~]	13.365	[~]	13.676	[~]	12.753	[~]	12.279	[~]	12.345	[~]
THC0290_T_0367	-1	518423	3	213	NA	0.59147	NA	0.991336	NA	NA	NA	NA	NA	aagcaatttagTCAgttaattatttttaaagtgaTTATTACCGCAAGCTTATTACTAattg	[~]	8.602	[~]	8.734	[~]	8.655	[~]	8.415	[~]	8.81	[~]	7.922	[~]	8.844	[~]	9.783	[~]	10.153	[~]	10.187	[~]	8.564	[~]	8.532	[~]	12.42	[~]	13.202	[~]	12.273	[~]	11.818	[~]	11.568	[~]
THC0290_T_0368	-1	519640	7	390	SM3	0.905698	SigA	0.979007	450	THC0290_0426	NA	Probable ABC-type transport system, ATPase and permease components	THC0290_v2_0442	tcgatttatcgatattTTGaaaacaaacacatGCTTTTATTATATTTGTcatcatggtatt	[+]	8.298	[+]	8.357	[+]	8.362	[+]	8.048	[+]	8.255	[+]	7.894	[+]	8.186	[+]	10.119	[+]	9.757	[+]	10.569	[+]	8.327	[+]	8.443	[~]	13.518	[~]	14.201	[~]	12.551	[+]	11.961	[~]	14.05	[~]
THC0290_T_0369	-1	519884	6	862	SM1	0.992669	SigA	1	14	THC0290_0427	NA	Probable transcriptional regulator, TetR family	THC0290_v2_0443	AAATAaaagttaaaatttcattatTAATAGTAATACTATTATATTTGCAtaaataaatata	[+]	6.492	[+]	6.706	[+]	6.663	[+]	6.15	[+]	6.27	[+]	5.192	[+]	6.458	[+]	8.454	[+]	8.299	[+]	10.028	[+]	6.522	[+]	6.612	[+]	13.581	[+]	13.623	[+]	11.667	[+]	10.973	[+]	14.181	[+]
THC0290_T_0370	1	519991	88	598	SM1	0.563479	SigA	0.999334	29	THC0290_0428	cat2	4-hydroxybutyrate coenzyme A transferase	THC0290_v2_0444	TTTttattattatgagatgcgttTTGTCATATTTTGGCTAATTTTACGttactaattttat	[+]	11.564	[+]	11.35	[+]	11.763	[+]	11.942	[+]	12.13	[+]	12.546	[+]	12.436	[+]	10.803	[+]	12.797	[+]	12.913	[+]	11.912	[+]	11.809	[+]	12.017	[+]	11.732	[+]	11.82	[+]	12.095	[+]	12.077	[+]
THC0290_T_0371	1	520066	23	599	NA	0.942353	NA	1	-46	THC0290_0428	cat2	4-hydroxybutyrate coenzyme A transferase	THC0290_v2_0444	tattatgggtaaatatGTTTcggctcaagaagccGTAAAAATTATAAAATCTAATGATCga	[+]	11.564	[+]	11.35	[+]	11.763	[+]	11.942	[+]	12.13	[+]	12.546	[+]	12.461	[+]	10.803	[+]	12.797	[+]	12.913	[+]	11.912	[+]	11.809	[+]	12.017	[+]	11.732	[+]	11.82	[+]	12.095	[+]	12.077	[+]
THC0290_T_0372	1	523113	4	995	NA	0.527824	NA	0.959014	NA	NA	NA	NA	NA	cccgataccaaacaaaaaggggatactgttttggcaggaatgataaacctaaacaccattg	[~]	9.659	[-]	9.632	[~]	10.909	[~]	10.953	[~]	12.062	[~]	12.802	[~]	12.747	[+]	13.921	[~]	14.12	[~]	13.977	[~]	11.183	[~]	10.962	[~]	13.957	[~]	13.324	[~]	13.541	[~]	12.753	[~]	13.021	[~]
THC0290_T_0373	1	523448	3	1646	NA	0.507498	NA	0.752416	NA	NA	NA	NA	NA	ctattttggtggcataggtgctgctagtaaaaacggAATTTTGTTTAAAGGATCCAGTttt	[~]	9.784	[~]	9.706	[~]	10.408	[~]	10.483	[~]	10.959	[~]	10.915	[~]	11.372	[-]	9.599	[~]	11.768	[~]	11.409	[~]	10.582	[~]	10.532	[~]	12.417	[~]	12.582	[~]	12.259	[~]	11.764	[~]	12.077	[~]
THC0290_T_0374	1	524894	24	913	SM1	0.993669	SigA	1	-4;92;158;365;463	THC0290_miscRNA_0002;THC0290_N_0312;THC0290_0431;THC0290_N_0313;THC0290_0432	NA;NA;thiS;NA;thiC	TPP riboswitch [THI element];new transcription segment;Thiamine biosynthesis protein ThiS;new transcription segment;Thiamine biosynthesis protein ThiC	NA;NA;THC0290_v2_0448;NA;THC0290_v2_0449	AAAacagtaaatacaataccagtATTCAAAATAATTCTTACATTTGCGataactttagggg	[+]	8.474	[+]	8.496	[~]	8.757	[~]	8.955	[~]	9.678	[+]	10.694	[+]	10.015	[~]	10.775	[+]	11.282	[+]	11.774	[~]	8.684	[~]	8.781	[+]	12.368	[+]	12.073	[~]	10.662	[~]	10.383	[+]	12.517	[+]
THC0290_T_0375	1	531976	110	1655	SM2	0.639787	SigA	0.999667	22	THC0290_0439	pyrH	UMP kinase	THC0290_v2_0456	aaaattaaatcggttTTtataaaaccgaagAATATCTTTATATTTGCAACACAAAacaagt	[+]	12.313	[+]	12.329	[+]	12.05	[+]	12.006	[+]	12.039	[+]	11.805	[+]	11.51	[+]	11.385	[+]	11.861	[+]	12.187	[+]	12.054	[+]	12.035	[+]	11.953	[+]	12.343	[+]	11.526	[+]	11.7	[+]	13.073	[+]
THC0290_T_0376	-1	538119	3	821	SM1	0.682439	SigA	0.998667	NA	NA	NA	NA	NA	TTttaggactttacgtccaattTTAATCTTGTTTTCGTACTTTCGTttctgaattaaacta	[+]	6.143	[+]	6.281	[+]	6.507	[+]	6.472	[+]	7.021	[+]	8.026	[+]	6.886	[+]	7.928	[+]	8.209	[+]	10.034	[+]	6.649	[+]	6.483	[+]	9.434	[+]	7.279	[+]	6.981	[+]	6.478	[+]	7.062	[+]
THC0290_T_0377	-1	541615	4	953	SM1	0.951683	SigA	0.998001	30	THC0290_0445	NA	Probable Na+/H+ antiporter	THC0290_v2_0462	TAATttatgaaacccttttatttGTAGGCGAATTTCGTCATCTTTGTAtgacacaaagctg	[+]	9.261	[+]	8.974	[+]	9.453	[+]	9.176	[+]	9.36	[+]	10.494	[+]	9.712	[+]	10.234	[+]	10.153	[+]	10.838	[+]	9.339	[+]	9.294	[+]	11.442	[+]	11.103	[+]	9.592	[+]	9.365	[~]	11.311	[+]
THC0290_T_0378	1	542265	316	1166	SM1	0.712096	SigA	0.999334	28	THC0290_0446	NA	Protein of unknown function	NA	TTTaatcgattttattttttattTTTTTATATTATTCATATTTTCACAatctaatttaaat	[+]	10.239	[+]	10.56	[+]	10.332	[+]	10.066	[+]	9.992	[+]	10.078	[+]	9.934	[+]	9.475	[+]	9.698	[+]	9.784	[+]	11.265	[+]	11.184	[+]	14.129	[+]	14.27	[+]	13.735	[+]	12.606	[+]	13.009	[+]
THC0290_T_0379	-1	542845	3	497	SM1	0.928357	SigA	0.967344	NA	NA	NA	NA	NA	AATGTatagattatgcaaaaataaCAAAAGCAGAATATTTATCTTTAAAcactggcacaga	[~]	10.069	[~]	9.96	[~]	10.61	[~]	10.528	[~]	11.13	[~]	11.449	[~]	10.891	[~]	12.482	[~]	11.258	[~]	11.394	[~]	10.602	[~]	10.662	[~]	10.809	[~]	10.094	[~]	10.702	[~]	11.248	[~]	9.952	[~]
THC0290_T_0380	-1	544494	9	85	SM1	0.994668	SigA	1	14	THC0290_0448	NA	Major facilitator superfamily (MFS) permease	THC0290_v2_0465	AAAGTAattcattgaaagttatagcaTTAAATAAAAAATATTATTTTTGTAaaaaataaaa	[~]	8.748	[~]	8.928	[+]	9.373	[~]	9.536	[+]	9.89	[+]	9.485	[~]	9.599	[+]	10.494	[~]	9.918	[~]	9.931	[~]	9.038	[~]	9.332	[~]	9.763	[-]	9.986	[~]	9.893	[~]	10.181	[-]	7.983	[-]
THC0290_T_0381	1	545646	9	194	SM4	1	Sig54	1	NA	NA	NA	NA	NA	ACTTtctgctttggagttgtaaCTGGCATAAATATTGTTGCCgatatattaagcttattac	[~]	4.343	[~]	4.089	[~]	4.527	[~]	3.979	[~]	3.946	[+]	5.76	[~]	4.945	[~]	4.367	[~]	3.98	[+]	5.941	[~]	4.907	[~]	4.859	[+]	6.63	[~]	4.563	[+]	5.35	[+]	5.567	[+]	5.685	[+]
THC0290_T_0382	-1	545725	14	802	SM1	0.93069	SigA	0.988337	NA	NA	NA	NA	NA	ACGctcatataaaataagaggagCGTACAACAAAATTGTATCTTTGTCagaatctgatcaa	[+]	7.956	[+]	7.925	[+]	7.68	[+]	7.9	[+]	8.224	[+]	8.725	[+]	8.648	[+]	7.269	[+]	9.592	[+]	10.133	[+]	7.886	[+]	7.886	[+]	10.167	[+]	9.847	[+]	9.46	[+]	9.382	[+]	9.863	[+]
THC0290_T_0383	-1	551906	10	1375	SM1	0.376208	SigA	0.564479	116	THC0290_0454	ilvE	Branched-chain-amino-acid transaminase	THC0290_v2_0471	tttacacaaatactatgacaacaaatacaaTTATTATTATTATTAGCattattattcgctc	[-]	6.863	[-]	7.224	[~]	8.099	[-]	7.392	[~]	6.282	[-]	4.729	[-]	5.329	[-]	4.484	[-]	6.597	[-]	6.173	[-]	6.365	[-]	6.75	[-]	8.784	[-]	8.805	[-]	8.209	[-]	7.941	[-]	6.219	[-]
THC0290_T_0384	-1	552131	16	1574	NA	0.686771	NA	1	341	THC0290_0454	ilvE	Branched-chain-amino-acid transaminase	THC0290_v2_0471	aattgtgattatcacaactgcaaaaggaatgctaTAAAAATATAAAAAAGAATATTTgaaa	[+]	9.21	[+]	9.078	[~]	8.174	[~]	7.857	[~]	6.561	[~]	8.602	[+]	7.022	[+]	9.418	[~]	8.377	[~]	10.383	[~]	8.297	[~]	7.914	[+]	11.025	[~]	9.455	[+]	8.934	[~]	9.496	[~]	9.143	[+]
THC0290_T_0385	-1	552234	11	401	SM1	0.668444	SigA	0.999	6;444	THC0290_N_0324;THC0290_0454	NA;ilvE	new transcription segment;Branched-chain-amino-acid transaminase	NA;THC0290_v2_0471	AATaaattatttaaagtaaatgtTTCGTTTTTTTATTATAGTTTTGTCccagaattagaaa	[~]	8.747	[~]	8.747	[~]	8.243	[~]	7.849	[~]	6.546	[~]	8.715	[~]	6.724	[~]	8.201	[~]	8.709	[~]	10.435	[~]	8.538	[~]	8.445	[~]	10.085	[~]	9.321	[~]	8.46	[~]	9.268	[~]	9.434	[~]
THC0290_T_0386	1	552451	34	180	SM1	0.647118	SigA	0.774742	75;172	THC0290_N_0325;THC0290_0455	NA;NA	new transcription segment;Protein of unknown function	NA;NA	ACtttaaaaattagaactttaaAACTAAAAAAAAGATTAGTTTTATGcttgtaaacttacg	[+]	10.727	[+]	10.779	[+]	11.577	[+]	11.26	[+]	10.913	[+]	11.534	[+]	10.379	[+]	10.478	[+]	10.053	[+]	10.951	[+]	11.639	[+]	11.833	[+]	10.857	[+]	10.011	[+]	10.171	[+]	10.242	[+]	10.65	[+]
THC0290_T_0387	1	552525	35	181	SM4	0.986338	Sig54	0.986338	1;98	THC0290_N_0325;THC0290_0455	NA;NA	new transcription segment;Protein of unknown function	NA;NA	AAacatctcgcaggcaaaaaaTTGGCAGCAATTTTGCAGAGatagaaaataacaacttaat	[+]	11.028	[+]	11.35	[+]	12.048	[+]	11.724	[+]	11.309	[+]	11.726	[+]	10.85	[+]	10.936	[+]	10.46	[+]	11.246	[+]	12.146	[+]	12.221	[+]	11.081	[~]	10.287	[+]	10.603	[+]	10.676	[+]	11.113	[+]
THC0290_T_0388	-1	554291	61	1348	SM1	0.2989	SigA	0.566145	0;18	THC0290_N_0329;THC0290_0456	NA;NA	new transcription segment;Putative sensor (PAS) domain for methyl-accepting chemotaxis sensory transducer	NA;THC0290_v2_0473	aacaatgataattatcatgttttacattaaactATAATTGTTATTTACAtcaaatttcaaa	[+]	10.22	[+]	10.756	[+]	10.989	[+]	10.875	[+]	9.673	[+]	10.214	[+]	8.026	[+]	8.659	[+]	5.839	[+]	8.168	[+]	11.053	[+]	11.317	[+]	10.264	[+]	8.754	[+]	9.86	[+]	10.42	[+]	7.27	[+]
THC0290_T_0389	-1	554825	18	1314	NA	0.420526	NA	0.983006	388	THC0290_N_0330	NA	new transcription segment	NA	ggagttatcggagaaaaattagaaattagaactttcGAAAAATTAGAAGGTGctttcgttg	[~]	14.524	[~]	14.521	[~]	13.584	[~]	13.471	[~]	12.198	[~]	12.112	[~]	12.388	[~]	12.798	[~]	12.267	[~]	12.604	[~]	13.826	[~]	13.484	[~]	12.805	[~]	12.941	[~]	12.954	[~]	13.025	[~]	11.978	[~]
THC0290_T_0390	-1	556137	79	1217	NA	0.918027	NA	1	-27	THC0290_0458	rpsB	30S ribosomal protein S2	THC0290_v2_0475	aacagaacgtaaactattacaaaatggcaaataaAATAGAAGTTAAAGACTTACTAGaagc	[-]	14.95	[-]	14.84	[-]	14.268	[-]	14.297	[-]	13.331	[~]	13.103	[-]	13.519	[-]	12.233	[-]	13.265	[-]	13.29	[~]	14.366	[-]	14.333	[-]	13.331	[-]	13.444	[-]	13.871	[-]	13.748	[-]	12.804	[-]
THC0290_T_0391	-1	557198	398	1660	SM2	0.991003	SigA	1	39;494	THC0290_0460;THC0290_0459	rplM;rpsI	50S ribosomal protein L13;30S ribosomal protein S9	THC0290_v2_0477;THC0290_v2_0476	atttttactttcctaTTTGcatttaaaataAATAATCGTACTTTTGCACTCCCTTtattgg	[+]	15.066	[+]	15.12	[+]	14.74	[+]	14.58	[+]	13.879	[+]	13.859	[+]	14.16	[+]	12.966	[+]	14.542	[+]	14.556	[+]	14.759	[+]	14.577	[+]	14.803	[+]	14.863	[+]	14.72	[+]	14.462	[+]	14.982	[+]
THC0290_T_0392	-1	558046	10	592	NA	0.931689	NA	0.996335	NA	NA	NA	NA	NA	ccatcgaagtaaaacaacaaacaaccttaaccgaGGTCGAACCGCAAACCAAAACCATGac	[-]	9.644	[-]	9.661	[-]	9.362	[-]	9.275	[-]	9.345	[-]	9.523	[-]	9.743	[-]	8.444	[-]	11.258	[-]	10.779	[-]	9.577	[-]	9.422	[-]	10.616	[-]	10.378	[-]	10.947	[-]	10.495	[-]	10.811	[-]
THC0290_T_0393	-1	558461	7	1744	NA	0.438854	NA	0.950683	NA	NA	NA	NA	NA	aacatatatacacgtcgtgttttatctggcgaatttATTGTGGTAAACAAACATTTActaa	[~]	13.952	[+]	13.838	[+]	13.778	[+]	13.552	[+]	13.458	[+]	13.299	[+]	12.998	[+]	10.935	[+]	13.27	[+]	13.06	[+]	13.929	[+]	13.857	[+]	12.919	[+]	12.4	[+]	13.328	[+]	13.031	[+]	12.4	[+]
THC0290_T_0394	-1	558525	3	1745	NA	0.573476	NA	0.999	NA	NA	NA	NA	NA	aatgccaactgcatctacttcacaaattctaggaAATAACGAAGCATTCGAACcatacaca	[+]	13.938	[+]	13.851	[+]	13.789	[+]	13.777	[+]	13.433	[+]	13.201	[+]	13.033	[+]	11.391	[+]	13.424	[+]	13.233	[+]	13.998	[+]	13.956	[+]	13.055	[+]	12.533	[+]	13.458	[+]	13.179	[+]	12.515	[+]
THC0290_T_0395	-1	561747	27	1734	SM2	0.956015	SigA	1	1;51	THC0290_N_0334;THC0290_0462	NA;nrdB	new transcription segment;Ribonucleoside-diphosphate reductase, beta subunit	NA;THC0290_v2_0480	gtgaataactatatcTTTCttttatagattCAAATCCTAATCTTTGTACTCTTTAatagtt	[+]	11.948	[+]	11.94	[+]	11.263	[+]	11.286	[+]	11.281	[+]	11.184	[+]	11.075	[+]	10.906	[+]	11.906	[+]	11.84	[+]	11.584	[+]	11.618	[+]	11.65	[+]	11.735	[+]	11.624	[+]	11.43	[+]	10.992	[+]
THC0290_T_0396	-1	562526	4	735	SM2	0.565145	SigA	1	13	THC0290_0463	NA	Protein of unknown function	NA	tcatttataaattagcaTTGcaatactgtaacATTAGCACTATATTTGCCTCAAAAAaata	[+]	10.225	[+]	10.125	[+]	9.672	[+]	9.635	[+]	9.741	[+]	9.963	[+]	9.861	[+]	9.411	[+]	10.892	[+]	11.281	[+]	9.754	[+]	9.718	[+]	11.416	[+]	11.367	[+]	10.662	[+]	10.338	[+]	10.861	[+]
THC0290_T_0397	1	562724	53	618	SM1	0.934022	SigA	0.999334	15	THC0290_0464	NA	MarC family integral membrane protein	THC0290_v2_0483	AAAAgaggaggttggggcacgccaAAAAAAATAATTGTTTATATTTGCAtcaaattttgaa	[+]	11.071	[+]	10.978	[+]	10.918	[+]	11.238	[+]	11.342	[+]	11.515	[+]	11.37	[+]	12.025	[+]	11.755	[+]	11.969	[+]	10.936	[+]	10.875	[+]	11.597	[+]	11.982	[+]	11.681	[+]	11.418	[~]	12.032	[+]
THC0290_T_0398	1	563342	12	1143	SM1	0.518494	SigA	0.998001	14;217	THC0290_0465;THC0290_0466	NA;NA	Hypothetical protein;Putative pyridine nucleotide-disulphide oxidoreductase, class-II family protein	NA;THC0290_v2_0485	CTaatgttaaaggcttgttcctgTAAGCTAAATTTTAGTATTTTTGACctataaataattt	[+]	12.191	[+]	12.137	[+]	12.332	[+]	12.341	[+]	12.599	[+]	13.159	[+]	12.779	[+]	12.572	[+]	12.917	[+]	13.583	[+]	12.12	[+]	12.171	[+]	15.278	[+]	14.617	[+]	13.532	[+]	13.591	[+]	15.393	[+]
THC0290_T_0399	-1	567080	36	453	SM1	0.966678	SigA	0.997667	17	THC0290_0469	NA	Probable transmembrane protein of unknown function	NA	AAAcaaatttaaaaaaccaatacCTAAAAAATAATTTGTAAGTTTGATaaatctaaaccat	[+]	9.841	[+]	9.935	[+]	10.402	[+]	10.22	[+]	9.699	[+]	10.439	[+]	9.543	[+]	7.127	[+]	9.825	[+]	10.675	[+]	10.481	[+]	10.316	[+]	11.53	[+]	10.651	[+]	10.289	[+]	10.027	[+]	10.739	[+]
THC0290_T_0400	1	567189	31	1127	SM1	0.8987	SigA	0.999667	19;451	THC0290_0470;THC0290_N_0340	NA;NA	Protein of unknown function;new transcription segment	NA;NA	AAGTATtttaaaatgatttcgaaaaAAATGTAGAAATGAGTATATTTGTAgaaatataaaa	[+]	11.155	[+]	10.969	[+]	11.192	[+]	11.119	[+]	11.628	[+]	12.314	[+]	11.872	[+]	13.046	[+]	12.473	[+]	12.967	[+]	11.246	[+]	11.271	[+]	14.835	[+]	14.236	[+]	13.326	[+]	13.25	[+]	15.353	[+]
THC0290_T_0401	1	567251	17	1128	NA	0.904365	NA	1	-43;389	THC0290_0470;THC0290_N_0340	NA;NA	Protein of unknown function;new transcription segment	NA;NA	caatattatgtctttttcagatttattcgacagcGAATTTAAAACAAGAAATAAAGGtcat	[+]	11.617	[+]	11.487	[+]	11.669	[+]	11.659	[+]	12.009	[+]	12.212	[+]	12.365	[+]	13.643	[+]	12.878	[+]	12.795	[+]	11.661	[+]	11.78	[+]	14.584	[+]	14.578	[+]	13.647	[+]	13.652	[+]	15.406	[+]
THC0290_T_0402	1	567522	18	1662	SM3	0.897368	SigA	0.998001	118	THC0290_N_0340	NA	new transcription segment	NA	gatcatgttcttgggCCtaaacagaaggaaGTTTTGACTAAGTTTGCtttagctttgggtt	[-]	10.56	[~]	10.515	[-]	10.373	[-]	10.617	[-]	10.809	[-]	11.044	[-]	11.161	[~]	13.464	[~]	12.036	[-]	11.722	[-]	10.54	[-]	10.337	[~]	13.989	[~]	14.261	[~]	13.177	[~]	13.016	[~]	14.615	[~]
THC0290_T_0403	-1	567849	4	1376	NA	0.976341	NA	0.998334	165;203	THC0290_N_0341;THC0290_N_0339	NA;NA	new transcription segment;new transcription segment	NA;NA	ttgtttctaactttaagataaatgactttcaaacTCATATATATAACGAAACCAGTGtcga	[~]	13.658	[~]	13.653	[~]	15.101	[~]	14.93	[~]	15.489	[~]	15.739	[~]	15.119	[~]	13.925	[~]	15.105	[~]	14.822	[~]	14.645	[~]	14.672	[+]	15.165	[~]	14.526	[~]	14.606	[~]	15.08	[~]	14.245	[~]
THC0290_T_0404	-1	568560	157	1059	SM1	0.998001	SigA	1	1;51	THC0290_N_0342;THC0290_0471	NA;uspA	new transcription segment;Universal stress protein UspA	NA;THC0290_v2_0490	TTAatttacaaaattttgtatagTGTTAAATAATTTCTTATCTTTATTaaagttttaattt	[+]	13.48	[+]	13.491	[+]	14.589	[+]	14.527	[+]	15.085	[+]	15.675	[+]	15.087	[+]	13.922	[+]	14.755	[+]	15.342	[+]	14.453	[+]	14.471	[+]	15.606	[+]	14.925	[+]	14.482	[+]	14.38	[+]	15.624	[+]
THC0290_T_0405	1	568632	100	31	SM2	0.903366	SigA	1	1;60	THC0290_N_0343;THC0290_0472	NA;NA	new transcription segment;Protein of unknown function	NA;THC0290_v2_0491	ttaacactatacaaaaTTTTgtaaattaaaaAAAAGTAGTATATTTGCACATTATTaagta	[+]	9.669	[+]	9.549	[+]	8.926	[+]	8.501	[+]	8.016	[+]	9.123	[+]	8.4	[+]	9.063	[+]	9.485	[+]	11.214	[+]	9.274	[+]	9.132	[+]	11.389	[+]	10.583	[+]	10.163	[+]	10.278	[+]	10.265	[~]
THC0290_T_0406	1	569080	35	715	NA	0.785738	NA	0.970676	92	THC0290_0473	nusA	Transcription elongation protein NusA	THC0290_v2_0492	agacattacagtcgaatggagttcGCGAGAGCCAAAAAAGATAGGGAaaggaaaagaaacg	[~]	13.464	[~]	13.246	[~]	12.597	[~]	12.512	[~]	11.382	[~]	11.556	[~]	11.593	[~]	12.252	[~]	11.751	[~]	12.065	[~]	12.79	[~]	12.66	[~]	12.312	[~]	12.866	[~]	12.803	[~]	12.762	[~]	12.439	[~]
THC0290_T_0407	1	572382	6	1689	NA	0.965678	NA	0.998334	NA	NA	NA	NA	NA	agaaaaagtattgcttGAAGCagaagttttagacCTGAAAGCAAACCCAAATAAACCAGca	[~]	13.28	[~]	13.144	[~]	12.47	[~]	12.623	[~]	11.793	[~]	11.355	[~]	11.732	[~]	10.506	[~]	11.303	[~]	11.583	[~]	12.619	[~]	12.567	[~]	11.679	[~]	11.47	[~]	12.131	[~]	11.984	[-]	11.431	[~]
THC0290_T_0408	-1	585406	16	981	SM5	0.997334	ND	0.997334	9	THC0290_0481	NA	Probable type II restriction endonuclease	NA	aaaaatcgcaggtgTaacattaaatcatttaattTTTGTAACTTGCGTACAtatatttaat	[+]	11.369	[+]	11.405	[+]	11.434	[+]	11.118	[+]	11.611	[+]	11.366	[+]	11.606	[+]	12.411	[+]	12.145	[+]	12.274	[+]	11.593	[+]	11.638	[+]	12.48	[+]	12.96	[+]	12.277	[+]	12.343	[+]	13.658	[+]
THC0290_T_0409	-1	585495	55	985	SM3	0.4995	SigA	0.996001	98	THC0290_0481	NA	Probable type II restriction endonuclease	NA	tttgtgtcaggaaaatttggtcaaaccgaAAGTTTTGGCTAATTTAGTCccaaactgcttt	[+]	9.491	[+]	9.407	[+]	9.696	[+]	9.665	[+]	9.934	[+]	10.802	[+]	10.088	[+]	11.519	[+]	11.221	[+]	11.902	[+]	10.268	[+]	10.118	[+]	12.258	[+]	11.802	[+]	11.166	[+]	11.2	[+]	11.679	[+]
THC0290_T_0410	-1	585921	22	476	SM1	0.655115	SigA	0.98967	NA	NA	NA	NA	NA	TTTGtatttggaagatttggcaaaTCCGAAAATAGGGCTTAATTTAGTCccaaactgcttt	[-]	9.675	[-]	9.544	[~]	9.827	[~]	9.601	[~]	10.19	[~]	10.406	[~]	10.852	[~]	10.182	[~]	11.111	[+]	11.326	[~]	10.072	[~]	10.114	[+]	12.376	[+]	12.192	[~]	11.405	[~]	10.939	[+]	11.488	[+]
THC0290_T_0411	1	586089	6	979	SM3	0.601799	SigA	0.998334	-2	THC0290_0482	NA	Transposase IS1182 family	THC0290_v2_0505	aaatatattaaaacTTGtttaaaagaatgGATTTTTGTAAATTTATCcatgcaaggaaaga	[+]	9.191	[+]	8.843	[+]	9.182	[+]	8.746	[+]	9.946	[+]	11.05	[+]	10.853	[+]	10.229	[+]	11.367	[+]	12.225	[+]	9.258	[+]	8.926	[+]	13.844	[+]	13.722	[+]	11.979	[+]	11.722	[+]	14.354	[+]
THC0290_T_0413	-1	589618	8	1118	SM1	0.92969	SigA	1	0;92;455	THC0290_N_0353;THC0290_0484;THC0290_N_0352	NA;NA;NA	new transcription segment;Protein of unknown function;new transcription segment	NA;NA;NA	AAAGTtggttttgcacttggaagtTCGGTCTTTAATTTATACATTTGGCtaactaaatccc	[+]	11.426	[+]	11.476	[+]	11.425	[+]	11.258	[+]	11.454	[+]	11.725	[+]	11.566	[+]	10.827	[+]	13.037	[+]	13.102	[+]	11.615	[+]	11.437	[+]	13.873	[+]	13.737	[+]	13.022	[+]	12.75	[+]	14.504	[+]
THC0290_T_0414	-1	589721	13	1162	SM1	0.826058	SigA	0.999334	1;103;195	THC0290_N_0354;THC0290_N_0353;THC0290_0484	NA;NA;NA	new transcription segment;new transcription segment;Protein of unknown function	NA;NA;NA	TAAatttacaaaaattcattcttTTAAACAAGTTTTAATATATTTGGTggagttgtgcaac	[+]	8.524	[+]	8.36	[+]	8.021	[+]	8.161	[+]	8.05	[+]	8.094	[+]	8.261	[+]	7.297	[+]	9.494	[+]	9.401	[+]	8.467	[+]	8.363	[+]	10.179	[+]	10.86	[+]	9.977	[+]	8.969	[+]	12.209	[+]
THC0290_T_0415	1	592915	132	1728	SM1	0.976008	SigA	1	20	THC0290_0487	NA	Protein of unknown function	THC0290_v2_0510	TTAtttcttttaaaagtttgtttATTGTATATTTTAACTACCTTTGCCgtgaacttttaac	[+]	11.396	[+]	11.372	[+]	11.398	[+]	11.155	[+]	10.346	[+]	9.863	[+]	9.84	[+]	11.225	[+]	9.912	[+]	9.638	[+]	11.411	[+]	11.708	[+]	9.546	[+]	9.905	[+]	9.905	[+]	10.189	[+]	9.083	[+]
THC0290_T_0416	-1	599901	143	442	SM1	0.867378	SigA	0.997667	1;276	THC0290_N_0358;THC0290_0492	NA;NA	new transcription segment;Probable transmembrane protein of unknown function	NA;NA	AAAaagaaaaaaaagttgcataaAATCAAAGCAAATCCTATTTTTGGAatgtttatgtaag	[+]	9.318	[+]	9.348	[+]	9.608	[+]	9.459	[+]	9.659	[+]	11.67	[+]	10.081	[+]	11.385	[+]	10.772	[+]	11.951	[+]	9.932	[+]	9.806	[+]	11.607	[~]	10.515	[+]	9.842	[+]	9.871	[~]	10.616	[+]
THC0290_T_0417	-1	601049	5	784	SM1	0.829723	SigA	0.992336	264;338	THC0290_N_0359;THC0290_0493	NA;NA	new transcription segment;Transposase IS3 family	NA;THC0290_v2_0516	TTgtcatcgaccaaatcaataaTGGTCAAATATCTGCTAACTTTGCCtccaagaagtataa	[+]	8.126	[+]	8.138	[+]	8.297	[+]	8.165	[+]	8.636	[+]	9.268	[+]	8.986	[+]	8.965	[+]	10.058	[+]	10.725	[+]	8.397	[+]	8.448	[~]	10.781	[~]	11.115	[~]	10.137	[+]	9.687	[~]	10.423	[~]
THC0290_T_0419	1	605420	3	584	SM2	0.853382	SigA	0.97934	NA	NA	NA	NA	NA	caaacttattggcatatactttttcgccgtTAAAATCATAAATTAGTACCGTTATtgttct	[~]	4.844	[~]	4.059	[~]	5.566	[+]	6.054	[+]	6.282	[~]	6.277	[+]	6.737	[~]	6.733	[+]	6.003	[+]	7.537	[+]	5.588	[~]	4.897	[+]	7.972	[~]	4.257	[+]	5.203	[+]	5.386	[~]	4.39	[+]
THC0290_T_0420	-1	607116	4	362	SM1	0.811729	SigA	0.844052	NA	NA	NA	NA	NA	CATtactatcttctcaatggtcaATAAACAATAATGGTTATCTTGGCGgaacggtagatgc	[~]	10.458	[~]	10.397	[~]	11.049	[~]	11.279	[~]	11.476	[~]	10.859	[~]	11.186	[~]	9.766	[~]	11.655	[~]	11.321	[~]	11.219	[~]	11.223	[~]	10.525	[~]	11.512	[~]	11.349	[~]	11.292	[+]	11.906	[~]
THC0290_T_0421	-1	608138	3	473	NA	0.624792	NA	1	33;434	THC0290_0501;THC0290_0500	NA;NA	Hypothetical lipoprotein precursor;Probable S8 and S53 subtilisin family serine endopeptidase precursor	THC0290_v2_0524;THC0290_v2_0523	aagagaaaatcttaaaaacggattgcctatgggaAAACAAAAGAAAAAGTAAACTAAtttt	[+]	9.102	[+]	9.504	[+]	10.1	[+]	10.128	[+]	10.458	[+]	10.397	[+]	10.347	[+]	8.096	[+]	10.797	[+]	10.802	[+]	10.133	[+]	10.473	[+]	10.327	[+]	10.527	[+]	10.382	[+]	10.389	[~]	10.67	[+]
THC0290_T_0422	-1	608359	3	741	SM1	0.853382	SigA	1	1;254	THC0290_N_0362;THC0290_0501	NA;NA	new transcription segment;Hypothetical lipoprotein precursor	NA;THC0290_v2_0524	ATAAatttacaaaaattcattcttTTAAACAAGTTTTAATATATTTGGTggagttgtgcaa	[+]	8.496	[+]	8.408	[+]	8.869	[+]	8.883	[+]	8.717	[+]	8.525	[+]	9.106	[+]	7.122	[+]	9.921	[+]	9.642	[+]	8.846	[+]	8.932	[+]	9.746	[+]	9.91	[+]	9.796	[+]	9.798	[+]	9.846	[+]
THC0290_T_0424	-1	611129	8	183	SM3	0.543486	SigA	1	464	THC0290_N_0364	NA	new transcription segment	NA	tatcagaaattggaaaGGtttttaattaaAAGTTTTGTTTATATTTGTgaaggcttggtct	[~]	8.405	[~]	8.379	[+]	8.563	[+]	8.528	[+]	9.072	[~]	9.115	[~]	9.38	[~]	9.776	[~]	10.057	[~]	10.274	[~]	8.688	[~]	8.707	[~]	11.841	[~]	11.734	[~]	10.465	[~]	9.896	[~]	11.414	[+]
THC0290_T_0425	-1	611403	10	544	SM1	0.957014	SigA	1	NA	NA	NA	NA	NA	AACTgatgccataatattaggaatTTAGAAATGTTGTACTATATTTGTAaagcgatgcaaa	[+]	4.938	[~]	4.696	[~]	4.211	[~]	4.463	[~]	4.443	[+]	6.729	[+]	5.457	[~]	6.679	[+]	8.262	[+]	9.635	[~]	4.712	[~]	4.806	[+]	11.673	[+]	9.89	[+]	7.978	[+]	7.587	[+]	9.637	[+]
THC0290_T_0426	1	612760	5	1057	SM1	0.616461	SigA	0.997667	1;170	THC0290_N_0365;THC0290_0505	NA;NA	new transcription segment;Protein of unknown function	NA;NA	TCAtctaaaatcctttaacaaggATTTTATTTATTTTATAAATTTACAacagagaaaacaa	[+]	9.026	[+]	9.137	[+]	10.042	[+]	9.83	[+]	10.71	[+]	11.62	[+]	10.456	[~]	11.384	[~]	10.898	[+]	11.353	[+]	10.239	[+]	10.123	[~]	11.328	[~]	11.189	[~]	10.379	[~]	10.27	[+]	11.947	[+]
THC0290_T_0427	-1	614002	3	1178	SM3	0.643119	SigA	0.991003	NA	NA	NA	NA	NA	ggtctgccttaataGagatttgagattgAATAGTGTCTAATTTTGTcattagatctgtgaa	[~]	3.812	[~]	3.801	[~]	3.774	[~]	4.155	[~]	4.847	[~]	5.182	[+]	5.221	[~]	6.275	[+]	5.867	[+]	6.496	[~]	4.089	[~]	4.478	[+]	8.325	[+]	8.724	[~]	7.666	[~]	7.467	[-]	3.828	[+]
THC0290_T_0428	1	634731	35	790	SM1	0.99067	SigA	1	1	THC0290_N_0375	NA	new transcription segment	NA	AAAcccaaggaataattaggtaaTAAATAGAATTCTATTACTTTTGCAgaagaaatataga	[~]	4.327	[~]	4.335	[~]	4.128	[~]	4.331	[~]	4.171	[~]	4.41	[~]	4.331	[~]	6.953	[~]	4.969	[~]	5.927	[~]	4.048	[~]	4.118	[~]	7.101	[-]	4.764	[~]	5.036	[~]	4.043	[+]	6.118	[+]
THC0290_T_0429	-1	635972	47	168	SM1	0.674109	SigA	0.999667	21	THC0290_0520	NA	Probable transcriptional regulator	THC0290_v2_0544	ATtaaaacataattttgttttaTATTAAAACATTTTATATATTTGTAcccaataactaatc	[+]	10.309	[+]	10.362	[+]	10.09	[+]	10.254	[+]	10.751	[+]	10.717	[+]	10.799	[+]	11.579	[+]	11.841	[+]	11.661	[+]	10.202	[+]	10.396	[+]	12.734	[+]	12.82	[+]	11.548	[+]	11.549	[+]	14.397	[+]
THC0290_T_0430	-1	642098	11	796	SM1	0.996335	SigA	0.998667	1	THC0290_N_0377	NA	new transcription segment	NA	AATTTTgtggtaaattcacgtttgcgTTTCGCAAGAAATATTATCTTAGTGgaaaataatc	[+]	11.318	[+]	11.161	[+]	11.347	[+]	11.494	[+]	11.963	[+]	12.871	[+]	12.781	[~]	11.524	[+]	13.015	[+]	13.421	[+]	11.665	[+]	11.395	[+]	14.023	[+]	13.238	[+]	13.148	[+]	13.018	[+]	12.347	[+]
THC0290_T_0431	-1	647058	3	885	NA	0.838054	NA	0.997001	-1	THC0290_N_0381	NA	new transcription segment	NA	tattgacagagaaatggaattagcgaaaaaaattATAATAGAAAAATAGCACTTCTGctaa	[~]	11.159	[~]	11.167	[~]	10.8	[~]	11.06	[~]	11.224	[~]	11.699	[~]	11.981	[~]	12.037	[+]	12.292	[~]	12.09	[~]	10.953	[~]	11.083	[+]	11.998	[+]	12.999	[+]	12.39	[~]	11.887	[+]	12.218	[+]
THC0290_T_0432	-1	650729	8	1038	SM1	0.933689	SigA	1	20	THC0290_0532	NA	Probable plasmid maintenance system antidote protein	NA	AATTtacctcaaaaaaattgctttATTTGAAATTTTATGTAACTTTGAGgtaaatttacct	[-]	9.836	[-]	9.808	[-]	9.514	[-]	9.625	[-]	9.573	[-]	10.598	[-]	9.876	[-]	10.542	[-]	10.737	[~]	11.469	[-]	9.846	[-]	9.868	[~]	12.076	[-]	11.3	[-]	10.328	[-]	10.545	[~]	11.544	[+]
THC0290_T_0433	-1	652533	4	449	NA	0.681773	NA	0.999	NA	NA	NA	NA	NA	tttaataacaatcggaaatgaaggaaataaaataGCTTTATATAAAAAACATCACTCaatg	[~]	11.91	[~]	11.815	[~]	11.976	[~]	11.932	[~]	12.175	[~]	11.71	[~]	11.818	[~]	12.347	[~]	11.922	[~]	11.837	[~]	11.961	[~]	12.41	[~]	12.072	[~]	12.42	[~]	12.493	[~]	12.663	[~]	11.769	[~]
THC0290_T_0434	-1	653741	14	798	SM1	0.8997	SigA	1	1;251	THC0290_N_0385;THC0290_0536	NA;NA	new transcription segment;Hypothetical transmembrane protein	NA;NA	TATCagaaattggaaaggtctttaATTAAAAGTTTTGCTTATATTTGTGaaggcttggtct	[~]	10.478	[~]	10.243	[~]	10.741	[~]	10.796	[~]	11.329	[~]	12.129	[~]	12.034	[~]	11.725	[~]	12.185	[~]	12.409	[~]	11.06	[~]	10.858	[+]	13.07	[~]	12.555	[~]	12.287	[~]	11.909	[~]	12.231	[~]
THC0290_T_0435	-1	655085	10	763	SM1	0.988337	SigA	0.993669	1;81	THC0290_N_0387;THC0290_0537	NA;NA	new transcription segment;Protein of unknown function	NA;NA	TTTTgtggtaaattcacgttcacgTTTCGCAAGAAATATTATCTTTAACagaaaataatca	[+]	11.992	[~]	12.252	[~]	12.506	[~]	12.451	[+]	12.81	[+]	12.718	[~]	12.748	[+]	13.697	[~]	12.77	[~]	12.85	[~]	12.4	[~]	12.594	[+]	13.917	[+]	13.735	[~]	13.233	[~]	13.049	[+]	13.389	[+]
THC0290_T_0436	-1	657496	60	1092	SM1	0.7994	SigA	0.919693	-33	THC0290_0540	NA	Hypothetical protein	NA	AAAAATaaaaagagaatatgatttgGAATAAAATTTGTTGTATATTTGAGaaattattttt	[+]	10.929	[+]	11.215	[+]	11.292	[+]	11.644	[+]	12.264	[+]	12.32	[+]	11.741	[+]	13.03	[+]	12.271	[+]	12.668	[+]	11.423	[+]	11.593	[+]	12.844	[+]	12.66	[+]	12.089	[+]	12.056	[+]	12.954	[+]
THC0290_T_0437	1	658609	83	1093	SM1	0.993002	SigA	1	1	THC0290_N_0390	NA	new transcription segment	NA	TCTatcttgttaaaaaagaaattCTTTATCTTATTCATTATATTTGTTactaattaaattt	[+]	8.363	[+]	8.321	[+]	9.584	[+]	9.566	[+]	10.333	[+]	11.435	[+]	10.543	[+]	12.302	[+]	12.09	[+]	12.067	[+]	9.488	[+]	9.324	[+]	12.463	[+]	12.416	[+]	10.481	[+]	10.585	[+]	12.448	[+]
THC0290_T_0438	-1	659020	25	828	SM1	0.998667	SigA	1	1;424	THC0290_N_0389;THC0290_0541	NA;NA	new transcription segment;Probable transmembrane protein of unknown function	NA;NA	AAAATGtgcaaaattcacatttttcTTTCGCAAGAATTTTTATCTTAGTGgaaaatatgtc	[~]	9.805	[~]	10.016	[~]	10.318	[~]	10.316	[~]	10.458	[+]	10.789	[~]	9.794	[~]	10.386	[~]	10.43	[+]	10.925	[~]	10.365	[+]	10.477	[+]	11.285	[~]	10.837	[~]	10.476	[~]	10.583	[+]	11.193	[+]
THC0290_T_0439	-1	659918	14	967	SM1	0.999334	SigA	0.999667	1;76	THC0290_N_0392;THC0290_0542	NA;NA	new transcription segment;Hypothetical protein	NA;NA	TTTTgtggtaagttcacgtttacaTTTCGCAAGAATTTTTATCTTTAACggaaaataaaaa	[+]	9.529	[+]	9.646	[+]	10.07	[+]	9.897	[+]	9.634	[+]	10.409	[+]	9.643	[+]	10.073	[+]	9.897	[+]	10.755	[+]	10.012	[+]	10.233	[+]	11.145	[+]	10.779	[+]	10.753	[+]	10.52	[+]	11.248	[+]
THC0290_T_0440	-1	660140	3	549	NA	0.519494	NA	0.994335	223;298	THC0290_N_0392;THC0290_0542	NA;NA	new transcription segment;Hypothetical protein	NA;NA	tatgaaacagacaaagttgttggaagttctaaatCAAAAGCCAAAAAAGGAATAAACAcat	[-]	6.645	[~]	6.73	[~]	6.565	[~]	6.45	[-]	6.366	[-]	6.041	[~]	6.965	[~]	6.888	[-]	8.122	[-]	7.868	[~]	6.239	[~]	6.413	[~]	9.499	[~]	9.563	[~]	9.716	[~]	9.573	[~]	10.308	[~]
THC0290_T_0441	1	661669	4	803	SM1	0.957014	SigA	1	1	THC0290_N_0394	NA	new transcription segment	NA	ATTaactattttaattaggttgtTATTTAGTGTTTTACTAAATTTGCAgaataacagaaat	[+]	7.037	[+]	6.626	[+]	7.205	[+]	7.011	[+]	7.372	[+]	8.149	[+]	7.588	[+]	8.905	[+]	8.417	[+]	9.51	[+]	7.601	[+]	7.507	[+]	12.661	[+]	12.588	[+]	12.056	[+]	11.168	[+]	12.383	[+]
THC0290_T_0442	-1	662055	16	823	SM1	0.875042	SigA	0.999	1	THC0290_N_0393	NA	new transcription segment	NA	TAAcatttataattagcttgtatTTTGTAATTTGTGCTTACATTTGACccaacgtaaaaaa	[+]	10.599	[+]	11.007	[+]	10.656	[+]	10.842	[+]	11.912	[+]	11.893	[+]	12.089	[+]	13.448	[+]	13.674	[+]	13.386	[+]	10.365	[+]	10.629	[+]	13.216	[+]	13.465	[+]	12.52	[+]	12.408	[+]	13.171	[+]
THC0290_T_0443	-1	668260	11	1072	SM1	0.812396	SigA	0.994002	21	THC0290_0549	NA	Truncated cytosine-specific modification methyltransferase, N-terminal region	NA	ACGAGaaattttttatttacgaattTTAAAAATTAAATTGTAATTTTGCTaaaacgataaa	[+]	10.564	[+]	10.557	[+]	10.135	[+]	10.088	[+]	10.616	[+]	11.018	[+]	10.901	[+]	11.991	[+]	11.657	[+]	12.044	[+]	10.507	[+]	10.643	[+]	12.809	[+]	12.723	[+]	11.835	[+]	11.736	[+]	13.086	[+]
THC0290_T_0449	-1	679944	5	1197	SM1	0.987671	SigA	1	18;316	THC0290_0557;THC0290_0556	NA;NA	Putative DNA binding protein;Probable type II modification methyltransferase Sau3AI	THC0290_v2_0595;THC0290_v2_0594	AAAATAaatcctttaaaaattgtttcTGAAATTAATTTGACTATTTTTGTCaaaacaaatt	[+]	9.602	[+]	9.518	[~]	8.983	[~]	8.976	[~]	9.081	[~]	8.9	[~]	8.936	[+]	9.414	[-]	9.319	[~]	10.201	[~]	9.175	[~]	9.176	[~]	10.19	[~]	10.265	[~]	9.651	[~]	9.696	[-]	9.67	[~]
THC0290_T_0450	-1	680246	17	797	SM1	0.998667	SigA	0.999	1;320	THC0290_N_0401;THC0290_0557	NA;NA	new transcription segment;Putative DNA binding protein	NA;THC0290_v2_0595	TTTTgtggtaaattcacgtttgcgTTCCGCAAGAAATTTTATCTTTAGTggaaaataaacg	[+]	11.238	[+]	11.053	[+]	11.301	[+]	11.428	[+]	11.812	[+]	12.722	[+]	12.735	[+]	11.4	[+]	12.952	[+]	13.336	[+]	11.581	[+]	11.288	[+]	13.796	[+]	13.206	[+]	13.052	[+]	12.943	[+]	12.357	[+]
THC0290_T_0451	-1	681236	10	562	SM1	0.991336	SigA	0.998001	1;80	THC0290_N_0402;THC0290_0558	NA;NA	new transcription segment;Protein of unknown function	NA;NA	TTTTgttgtaagttcacgtttacgTTTCGCAAGAATTTTTATCTTTAACagaaaataaaag	[+]	8.963	[+]	9.042	[+]	9.25	[+]	9.07	[+]	9.074	[+]	9.096	[+]	8.979	[+]	9.073	[+]	9.02	[+]	9.386	[+]	9.395	[+]	9.507	[+]	10.344	[+]	10.386	[+]	10.048	[+]	9.811	[+]	10.218	[+]
THC0290_T_0452	-1	684735	6	227	SM3	0.792403	SigA	0.991003	1	THC0290_N_0404	NA	new transcription segment	NA	aagaaattggggtttttGGGattaatttaaagTTTGTTTTGTACTTTTGAtttttggtgtt	[+]	10.058	[~]	9.929	[+]	10.14	[+]	10.158	[+]	10.65	[+]	11.034	[+]	11.327	[+]	9.804	[+]	11.714	[+]	11.836	[+]	10.359	[+]	10.135	[+]	12.635	[+]	12.13	[+]	11.567	[+]	11.136	[+]	10.908	[+]
THC0290_T_0453	1	687603	35	794	SM1	0.570143	SigA	0.997001	1	THC0290_N_0407	NA	new transcription segment	NA	GCtggaattaatttttttgtcatTTTATTTTATATCTTTATCTTTGGTttacatttcggtt	[~]	4.117	[~]	4.115	[+]	5.404	[+]	5.281	[+]	6.496	[+]	8.848	[+]	7.787	[+]	9.172	[+]	9.073	[+]	10.883	[+]	5.16	[+]	4.949	[+]	11.32	[+]	9.955	[+]	8.241	[+]	7.591	[+]	8.769	[+]
THC0290_T_0454	-1	687678	3	380	SM1	0.994335	SigA	0.998334	1;103	THC0290_N_0406;THC0290_0564	NA;NA	new transcription segment;Hypothetical protein	NA;NA	TTTgtggtaaattcacgtttacgTTTCGCAAGAAATTTTATCTTTAACggaaaataatcgg	[+]	9.788	[+]	9.628	[+]	9.468	[+]	9.119	[+]	8.751	[+]	9.383	[+]	8.87	[+]	8.621	[+]	9.144	[+]	9.833	[+]	9.856	[+]	9.595	[+]	10.254	[~]	9.512	[+]	9.224	[+]	9.148	[~]	9.494	[+]
THC0290_T_0456	-1	693405	31	978	SM1	0.970343	SigA	1	24	THC0290_0568	NA	Probable restriction endonuclease	NA	AAATgactaaccactgcaaaaaaCCAGCAAAAAAAGTTTAACTTTGTAaaataaaatttca	[~]	11.607	[~]	11.502	[~]	11.048	[~]	10.889	[~]	10.937	[+]	10.97	[~]	11.174	[+]	11.779	[+]	10.942	[+]	11.717	[~]	11.231	[~]	11.156	[+]	12.45	[+]	12.319	[~]	11.751	[~]	11.863	[+]	13.039	[+]
THC0290_T_0457	-1	695662	30	1301	SM1	0.896701	SigA	0.998001	24	THC0290_0570	NA	Protein of unknown function	THC0290_v2_0609	AACTatgttaattttgcatttcaATGTAAAATAAAGCGTATATTAGCAttatatttacaat	[-]	10.803	[-]	10.802	[-]	10.471	[-]	10.354	[-]	10.429	[-]	10.397	[-]	10.987	[~]	10.637	[-]	10.762	[-]	10.977	[-]	10.762	[-]	10.827	[-]	11.887	[-]	11.967	[-]	11.947	[-]	11.88	[-]	11.801	[~]
THC0290_T_0458	-1	696037	7	1309	NA	0.67944	NA	0.825392	-29;399	THC0290_N_0411;THC0290_0570	NA;NA	new transcription segment;Protein of unknown function	NA;THC0290_v2_0609	gcgggaatgccagctgaataaaaccagcccataaccgcagtttggcaatatggcggaattt	[~]	12.027	[~]	11.917	[~]	11.879	[~]	12.006	[~]	12.481	[~]	13.276	[~]	13.259	[~]	12.302	[~]	13.657	[~]	13.917	[~]	11.916	[~]	11.745	[~]	14.358	[~]	13.625	[~]	13.645	[~]	13.671	[~]	12.726	[~]
THC0290_T_0459	-1	696093	4	1191	NA	0.778074	NA	1	27;455	THC0290_N_0411;THC0290_0570	NA;NA	new transcription segment;Protein of unknown function	NA;THC0290_v2_0609	aagatgaagtgaattataataaatggAAAGCTATCGAAAAAGAAGACGCTAaaaatgcggg	[~]	11.556	[-]	11.386	[-]	11.301	[-]	11.334	[-]	11.792	[-]	12.31	[-]	12.626	[~]	11.956	[-]	13.08	[~]	13.237	[-]	11.327	[-]	11.288	[~]	13.519	[~]	12.999	[~]	13.095	[-]	12.826	[-]	12.403	[-]
THC0290_T_0460	-1	696471	3	1278	NA	0.937021	NA	0.964678	75;405	THC0290_0571;THC0290_N_0411	NA;NA	Hypothetical protein;new transcription segment	NA;NA	gtggaaaaccgtaaacgaattccaaacagtaactTTAATTTAGCATAAATAAAAGTGgagt	[+]	11.196	[+]	11.165	[+]	11.15	[+]	11.074	[+]	11.89	[~]	11.718	[+]	11.92	[~]	10.201	[+]	12.92	[~]	12.895	[+]	11.205	[+]	11.356	[~]	12.717	[~]	13.043	[~]	12.869	[~]	12.947	[~]	12.873	[~]
THC0290_T_0461	-1	696659	13	1125	SM1	0.826058	SigA	1	1;263	THC0290_N_0412;THC0290_0571	NA;NA	new transcription segment;Hypothetical protein	NA;NA	AAAttggggttttggtcttgactTTACACATTGTTTTGTACTTTTGTGttcagtgattaac	[~]	9.542	[~]	9.389	[+]	9.127	[+]	8.954	[+]	9.668	[+]	10.342	[+]	10.394	[+]	10.118	[+]	11.197	[+]	11.698	[+]	9.384	[+]	9.236	[+]	12.372	[+]	12.043	[+]	11.982	[+]	11.804	[+]	12.101	[+]
THC0290_T_0462	-1	696809	6	629	NA	0.921693	NA	0.994335	70;151;413	THC0290_N_0413;THC0290_N_0412;THC0290_0571	NA;NA;NA	new transcription segment;new transcription segment;Hypothetical protein	NA;NA;NA	ttttacgtgtattttaCACCaaatgaaaaaaattCTAGAAATTACACATTGAAATTTAGtg	[~]	8.646	[~]	8.691	[~]	7.867	[~]	7.91	[~]	7.636	[~]	7.163	[~]	7.616	[~]	6.277	[~]	8.804	[~]	8.415	[~]	8.182	[~]	8.195	[~]	9.573	[~]	10.231	[~]	10.053	[~]	9.59	[+]	10.85	[~]
THC0290_T_0463	-1	699011	116	864	SM1	0.77041	SigA	0.999667	50	THC0290_N_0415	NA	new transcription segment	NA	TCCttttttaattgcttcaatatTGACATTAATTAGTTTAATTTTGTTtcttaaaagtttt	[+]	11.321	[+]	11.4	[+]	11.243	[+]	11.389	[+]	11.453	[+]	11.839	[+]	11.885	[+]	11.341	[+]	12.791	[+]	13.097	[+]	11.409	[+]	11.36	[+]	12.914	[+]	12.533	[+]	12.5	[+]	11.986	[+]	12.357	[+]
THC0290_T_0464	-1	700335	14	1052	SM1	0.784738	SigA	0.995335	5;138	THC0290_N_0416;THC0290_0574	NA;NA	new transcription segment;Major facilitator superfamily (MFS) permease	NA;THC0290_v2_0614	CCAaaaattaaaattaacaacaaATCAAAAAAAACATTTATCTTTGAAttattaactaaat	[~]	10.43	[~]	10.245	[~]	9.893	[~]	9.617	[~]	9.514	[+]	10.435	[+]	9.758	[+]	10.509	[+]	10.532	[+]	11.087	[~]	10.268	[~]	10.071	[+]	11.794	[~]	11.424	[~]	10.719	[~]	10.647	[~]	11.709	[+]
THC0290_T_0465	-1	701718	7	1430	SM1	0.712429	SigA	0.997334	3;377	THC0290_0576;THC0290_0575	NA;NA	Transposase IS3 family;Transposase IS3 family	THC0290_v2_0616;THC0290_v2_0615	GATttagttcaaaactaagagagTGTTTTCAAAATCCTTAAATTTGAAttattatgaaaac	[~]	10.823	[~]	10.75	[~]	10.164	[~]	10.168	[~]	9.951	[~]	9.74	[~]	10.006	[~]	10.671	[~]	10.836	[~]	10.328	[~]	10.671	[~]	10.575	[~]	10.866	[~]	11.111	[~]	10.544	[~]	10.512	[~]	10.289	[~]
THC0290_T_0466	-1	701856	19	771	SM1	0.996335	SigA	1	1;36;141	THC0290_N_0418;THC0290_N_0417;THC0290_0576	NA;NA;NA	new transcription segment;new transcription segment;Transposase IS3 family	NA;NA;THC0290_v2_0616	ATTtttcgcaactcgacattgacGTCTTAAACTTTGTTTATATTTGTGccattatgaggca	[~]	10.58	[~]	10.52	[~]	9.919	[~]	9.899	[~]	9.74	[~]	10.073	[~]	9.899	[+]	9.771	[~]	10.305	[~]	10.754	[~]	10.368	[~]	10.191	[~]	11.294	[~]	10.75	[~]	10.171	[~]	9.847	[~]	9.641	[~]
THC0290_T_0467	-1	702164	73	799	SM1	0.765412	SigA	0.998001	309;344;449	THC0290_N_0418;THC0290_N_0417;THC0290_0576	NA;NA;NA	new transcription segment;new transcription segment;Transposase IS3 family	NA;NA;THC0290_v2_0616	TTTGtatcagaaagatttggcataTCCGAAGATAAGGCTTAATTTAGTCccaaactgcttg	[~]	10.623	[~]	10.325	[~]	10.603	[~]	10.732	[~]	11.106	[+]	11.991	[+]	11.802	[+]	10.889	[+]	12.386	[+]	12.639	[~]	11.13	[~]	10.724	[+]	13.252	[+]	12.7	[+]	12.363	[+]	11.862	[+]	11.964	[+]
THC0290_T_0468	-1	702754	4	1452	NA	0.937021	NA	0.999667	468	THC0290_N_0419	NA	new transcription segment	NA	attatttagaaACAGcaataagttggataaacaaTGATGCTATTGAAGATTATATGTcaaa	[~]	12.201	[~]	12.183	[~]	11.784	[~]	11.786	[~]	11.285	[~]	10.823	[~]	10.91	[~]	9.205	[~]	10.126	[~]	9.568	[~]	11.96	[~]	12.116	[~]	8.718	[+]	9.672	[~]	10.068	[~]	10.132	[+]	10.92	[~]
THC0290_T_0469	-1	702804	3	1395	NA	0.921026	NA	0.986338	NA	NA	NA	NA	NA	agcttcgagtattggaAGCGattatttgacaggtTCGCCTATTCGTCAAGATTATTTAGaa	[~]	11.943	[~]	11.874	[~]	11.32	[~]	11.46	[~]	10.915	[~]	10.543	[~]	10.637	[~]	9.033	[~]	9.651	[~]	9.13	[~]	11.691	[~]	11.745	[~]	7.874	[~]	7.829	[~]	9.482	[~]	9.739	[~]	8.563	[-]
THC0290_T_0470	-1	704107	3	280	NA	0.575808	NA	0.997334	NA	NA	NA	NA	NA	aacaaatccgaaaaagccatttatcttgaatatAATGGCGACAAAAACGGAAACAGAGttc	[~]	11.908	[~]	11.919	[~]	11.647	[~]	11.491	[~]	11.205	[~]	11.044	[~]	10.912	[~]	10.215	[~]	9.913	[~]	9.538	[~]	11.845	[~]	11.709	[~]	9.267	[~]	9.21	[~]	9.509	[~]	9.544	[~]	9.996	[-]
THC0290_T_0471	-1	704582	66	1397	SM1	0.644785	SigA	0.991669	1;164	THC0290_N_0420;THC0290_0578	NA;NA	new transcription segment;Site-specific DNA-methyltransferase (adenine-specific)	NA;NA	TTaaaagtccttttgatgatttATAACAAATTTTACATATATTAGCTcccgaaaaaaaact	[~]	11.595	[~]	11.393	[-]	11.453	[-]	11.223	[-]	10.982	[-]	11.71	[-]	10.972	[~]	10.684	[-]	10.86	[-]	10.75	[~]	11.892	[~]	11.512	[-]	10.424	[~]	10.109	[-]	9.849	[-]	10.054	[-]	9.815	[~]
THC0290_T_0472	-1	705650	8	787	SM1	0.89037	SigA	0.960013	0	THC0290_0579	NA	Integrase/recombinase	THC0290_v2_0620	AAacataccttctaaagtaattCTTACTTCCTTTTTATATCTTTAACtttatgaaatggca	[~]	10.564	[~]	10.467	[~]	10.499	[~]	10.417	[~]	10.173	[~]	10.474	[~]	10.236	[+]	8.338	[+]	9.475	[+]	9.931	[~]	10.602	[~]	10.515	[+]	11.098	[+]	11.277	[~]	9.878	[~]	9.661	[+]	11.032	[+]
THC0290_T_0473	-1	706350	6	468	SM1	0.924359	SigA	0.927358	327	THC0290_N_0421	NA	new transcription segment	NA	CAgaaatcgaaaaaacagaagcAGACTTTATTTGCCTTAACTTTGCAaatggcgatatggt	[~]	12.013	[~]	12.037	[~]	12.282	[~]	12.067	[~]	11.768	[~]	11.951	[~]	12.025	[~]	9.384	[~]	11.823	[~]	11.915	[~]	12.434	[~]	12.12	[~]	11.427	[~]	10.946	[~]	11.475	[~]	11.041	[~]	11.341	[~]
THC0290_T_0474	-1	707628	46	143	SM1	0.978007	SigA	0.999334	1;87	THC0290_N_0422;THC0290_0580	NA;gpmI	new transcription segment;2,3-bisphosphoglycerate-independent phosphoglycerate mutase	NA;THC0290_v2_0621	ATCgattataataaagccaaaatCTGGATATAATTTTTTACATTTGAAgccatttcctgct	[+]	11.744	[+]	11.376	[+]	11.557	[+]	11.468	[+]	11.054	[+]	12.01	[+]	11.438	[+]	9.139	[+]	11.665	[+]	12.596	[+]	12.001	[+]	11.708	[+]	12.289	[+]	11.54	[+]	11.236	[+]	11.156	[+]	11.977	[+]
THC0290_T_0475	1	707750	95	1042	SM3	0.732423	SigA	0.997667	32	THC0290_0581	NA	Protein of unknown function	NA	taagtgtataaaaatTTtgttgttgttgtTTTTTATTGCATATTTGTttgatacgaataat	[+]	9.201	[+]	8.988	[+]	10.246	[+]	10.325	[+]	10.809	[+]	11.505	[+]	11.001	[+]	11.34	[+]	11.521	[+]	11.995	[+]	10.405	[+]	10.362	[+]	13.505	[+]	13.747	[+]	12.032	[+]	11.727	[+]	14.497	[+]
THC0290_T_0476	-1	709421	3	1336	NA	0.716428	NA	0.934688	NA	NA	NA	NA	NA	taccattaccaatatttatgacaaagaaacacaaGATGCGGTAAAAACATTTCAATCTCga	[~]	8.813	[~]	9.238	[~]	9.866	[~]	10.062	[~]	10.857	[~]	10.963	[~]	11.139	[~]	9.818	[~]	10.5	[~]	10.636	[~]	9.893	[~]	10.015	[~]	10.213	[~]	8.789	[~]	10.692	[~]	10.509	[~]	9.959	[~]
THC0290_T_0477	-1	710420	5	1004	SM2	0.975008	SigA	0.98134	239	THC0290_0582	NA	Protein of unknown function containing peptidoglycan binding domain	THC0290_v2_0623	tgtgTCTGtttataaaaatAAAAACAGTACTTTTAAATCCCCAAatcaatatcaagttcgt	[+]	9.292	[+]	9.434	[+]	9.973	[+]	10.24	[+]	11.199	[+]	11.798	[+]	11.589	[+]	12.295	[+]	12.118	[+]	12.578	[+]	10.135	[+]	10.236	[+]	11.885	[+]	11.734	[+]	11.377	[+]	11.368	[+]	11.865	[+]
THC0290_T_0478	-1	710432	10	1005	SM2	0.95868	SigA	1	251	THC0290_0582	NA	Protein of unknown function containing peptidoglycan binding domain	THC0290_v2_0623	aattgtaggtattgtgTCTGtttataaaaatAAAAACAGTACTTTTAAATCCCCAAatcaa	[+]	9.292	[+]	9.434	[+]	9.973	[+]	10.24	[+]	11.199	[+]	11.798	[+]	11.589	[+]	12.295	[+]	12.118	[+]	12.578	[+]	10.135	[+]	10.236	[+]	11.885	[+]	11.734	[+]	11.377	[+]	11.368	[+]	11.865	[+]
THC0290_T_0479	-1	710561	34	196	SM4	1	Sig54	1	380	THC0290_0582	NA	Protein of unknown function containing peptidoglycan binding domain	THC0290_v2_0623	AATtacagctcaagaaacgcttTTGGTACGAAATTTGGTATTaagaccaggaaaacttgtt	[+]	8.489	[+]	8.599	[+]	9.178	[+]	9.28	[~]	9.755	[+]	10.61	[+]	9.941	[+]	9.82	[+]	9.451	[+]	10.08	[+]	9.178	[+]	9.324	[+]	10.091	[+]	8.37	[+]	9.327	[+]	9.808	[+]	9.272	[+]
THC0290_T_0480	1	710904	2510	817	SM2	0.93902	SigA	0.999667	0;73	THC0290_tRNA_0012;THC0290_N_0428	NA;NA	transfer RNA-Gly;new transcription segment	NA;NA	aaaagtTTGgaaataacaagaaAGATTCTGTATCTTTGCACCACAGTaatgcgaaagtagc	[+]	7.35	[+]	7.13	[+]	6.873	[+]	7.203	[+]	7.417	[+]	7.955	[+]	8.547	[+]	9.929	[+]	9.389	[+]	9.578	[~]	6.976	[+]	6.801	[+]	11.382	[+]	9.898	[+]	9.085	[+]	8.541	[+]	10.52	[+]
THC0290_T_0481	1	710932	106	915	SM6	0.873709	SigECF	0.873709	-28;45	THC0290_tRNA_0012;THC0290_N_0428	NA;NA	transfer RNA-Gly;new transcription segment	NA;NA	tgtatctttgcaccacaGTAATgcgaaagtagctCAGTTGGTAGAGCTCCAgccttccaag	[~]	5.62	[~]	5.12	[-]	4.299	[-]	4.207	[-]	4.199	[-]	4.748	[-]	5.065	[-]	5.286	[-]	4.062	[-]	4.536	[-]	4.385	[-]	3.906	[-]	6.042	[-]	4.964	[-]	5.091	[-]	4.374	[+]	6.588	[-]
THC0290_T_0482	1	710942	76	375	SM6	0.588137	SigECF	0.588137	-38;35	THC0290_tRNA_0012;THC0290_N_0428	NA;NA	transfer RNA-Gly;new transcription segment	NA;NA	caccacaGTAATgcgaaagtagctCAGTTGGTAGAGCTCCAgccttccaagctggttgtcg	[~]	5.62	[~]	5.12	[-]	4.299	[-]	4.207	[-]	4.199	[-]	4.748	[-]	5.065	[-]	5.286	[-]	4.062	[-]	4.536	[-]	4.385	[-]	3.906	[-]	6.042	[-]	4.964	[-]	5.091	[-]	4.374	[+]	6.588	[-]
THC0290_T_0483	-1	711218	3	1602	NA	0.943352	NA	0.999667	207;232	THC0290_N_0429;THC0290_N_0426	NA;NA	new transcription segment;new transcription segment	NA;NA	taatccctttcaatctGAATCcgcattttttagaTGCAAACTCACAATCGACACACATGgg	[~]	8.799	[~]	8.854	[~]	9.881	[~]	10.089	[~]	10.48	[~]	10.739	[~]	10.445	[~]	9.963	[~]	10.795	[~]	10.534	[~]	9.924	[~]	10.005	[~]	9.383	[~]	8.089	[~]	9.48	[~]	9.63	[~]	8.548	[~]
THC0290_T_0484	-1	711738	17	469	SM1	0.998001	SigA	1	19	THC0290_0584	pepE	Dipeptidase E	THC0290_v2_0626	TTATtaatgccttggtaattttttGTTAATAATAATATTTACCTTTGAAtacattaaaata	[+]	9.895	[+]	9.972	[+]	11.06	[+]	10.858	[+]	11.319	[+]	11.528	[+]	11.531	[+]	10.455	[+]	11.497	[+]	11.207	[+]	10.845	[+]	10.995	[+]	10.491	[+]	9.807	[+]	10.426	[+]	10.296	[+]	11.449	[+]
THC0290_T_0485	1	711822	3	719	SM1	0.757081	SigA	0.944019	14	THC0290_0585	NA	Protein of unknown function precursor	NA	TACcaaggcattaataatatattGGGACAATCTGAATCTATTTTTACCaaatattaatatt	[+]	8.143	[+]	8.075	[+]	7.546	[+]	7.423	[+]	6.774	[+]	6.529	[+]	6.571	[+]	7.578	[~]	5.688	[+]	6.383	[+]	7.149	[+]	7.313	[+]	9.748	[+]	9.131	[+]	8.65	[+]	8.339	[~]	7.884	[+]
THC0290_T_0486	1	712569	3	1389	SM1	0.892702	SigA	0.996001	0	THC0290_0586	NA	Protein of unknown function	NA	AAAatacaaacaaattacatttgCCAAAAAAGAATAATTACTTTCGTAaaatgaaaaaatc	[~]	8.138	[~]	8.044	[~]	7.721	[~]	7.538	[~]	7.153	[+]	7.66	[~]	6.853	[~]	7.415	[~]	7.103	[~]	7.471	[~]	7.528	[~]	7.724	[~]	8.615	[-]	7.656	[~]	7.496	[~]	8.077	[-]	6.412	[-]
THC0290_T_0487	1	713112	11	550	SM1	0.93902	SigA	0.998667	19	THC0290_0587	NA	Probable M1 family aminopeptidase precursor	THC0290_v2_0629	TAAAaccttaagtttttgtttttaTATGATAAAAATAATTACATTTATAgctttaaaattg	[+]	11.318	[+]	11.492	[+]	12.192	[+]	11.9	[+]	11.626	[+]	11.885	[+]	11.919	[+]	10.119	[+]	11.309	[+]	11.794	[+]	11.842	[+]	11.829	[+]	13.492	[+]	13.613	[+]	12.506	[+]	12.149	[+]	15.143	[+]
THC0290_T_0488	1	713812	6	768	NA	0.507831	NA	0.928024	NA	NA	NA	NA	NA	aattgtacgttttagcacaattttatccaagaatGGCGGTTTATAATGATGTAGAAGgttg	[~]	11.721	[~]	11.708	[~]	12.207	[~]	12.269	[~]	11.938	[~]	11.397	[~]	11.691	[+]	11.359	[~]	10.805	[~]	10.548	[~]	12.129	[~]	12.246	[~]	11.393	[~]	11.59	[~]	11.965	[~]	11.979	[-]	11.707	[~]
THC0290_T_0489	-1	716973	14	366	SM2	0.853382	SigA	0.999334	14	THC0290_0588	NA	Probable amino acid-transporting permease	THC0290_v2_0630	ttcaaaaatttatgaTTTGtaattttaacaAAAAAAACTATATTAGCGTTTAAAAatattt	[+]	10.071	[+]	10.083	[+]	9.919	[+]	9.981	[+]	9.055	[+]	8.929	[+]	8.368	[+]	5.73	[+]	8.511	[+]	8.323	[+]	10.456	[+]	10.372	[+]	9.962	[+]	10.123	[+]	8.448	[+]	8.349	[+]	11.087	[+]
THC0290_T_0490	1	717168	17	430	SM1	0.932023	SigA	1	0	THC0290_0589	ruvB	Holliday junction DNA helicase RuvB	THC0290_v2_0631	TATgacatttcaacttgcgacttTAACGAATAAACTTTTATATTTGTAcgatgaatgaaaa	[+]	10.259	[+]	10.173	[+]	10.32	[+]	10.079	[+]	10.047	[+]	10.841	[+]	10.271	[+]	9.199	[+]	11.123	[+]	11.369	[+]	10.467	[+]	10.242	[+]	11.185	[+]	10.795	[+]	10.119	[+]	10.022	[+]	11.127	[+]
THC0290_T_0491	1	718621	6	898	SM4	0.979673	Sig54	0.979673	NA	NA	NA	NA	NA	ATtttgtgattaaagaaaaaTTGGCAGCATTATTGCATTTtattcaaactgaaattggaga	[~]	8.738	[~]	8.675	[~]	7.974	[~]	8.137	[+]	7.667	[~]	6.905	[+]	7.495	[+]	5.688	[+]	8.842	[+]	7.656	[~]	8.091	[~]	8.107	[+]	7.088	[+]	9.775	[+]	8.34	[+]	7.866	[+]	10.78	[+]
THC0290_T_0492	1	719233	10	334	SM1	0.988004	SigA	0.999667	18	THC0290_0591	maeB	Malate dehydrogenase (oxaloacetate-decarboxylating) (NADP+)	THC0290_v2_0633	ATTaacatcaaaaatttcttacTTCAAATTCATATTTTAACTTTGTAaattcatagtaatt	[+]	11.254	[+]	11.155	[+]	10.963	[+]	10.761	[+]	10.687	[+]	10.745	[+]	10.562	[+]	9.749	[+]	10.669	[+]	10.854	[+]	11.114	[+]	11.184	[+]	10.941	[+]	10.909	[+]	10.258	[+]	10.263	[~]	10.727	[+]
THC0290_T_0493	1	720229	5	1284	NA	0.784738	NA	0.924359	NA	NA	NA	NA	NA	gttcagattttCCAAatcaagtaaataatgttttAGGATTTCCTTACATTTTCCGTGgcgc	[~]	11.939	[~]	11.908	[~]	11.541	[~]	11.618	[~]	11.314	[~]	11.078	[~]	11.25	[~]	8.524	[~]	10.535	[~]	10.213	[~]	11.613	[~]	11.709	[~]	9.274	[~]	8.986	[~]	9.974	[~]	10.168	[~]	8.757	[~]
THC0290_T_0494	1	720739	3	326	NA	0.536821	NA	0.978674	NA	NA	NA	NA	NA	aactaaaagaagaaataggtttcgatgccgaagtAGCCATCTTAGATCCAAAAAcaaaaga	[~]	12.177	[~]	11.941	[~]	11.818	[~]	11.721	[~]	11.592	[~]	11.09	[~]	11.372	[~]	8.129	[~]	10.49	[~]	10.171	[~]	11.847	[~]	11.829	[~]	9.05	[+]	9.587	[~]	9.858	[~]	10.136	[~]	10.005	[~]
THC0290_T_0495	1	725942	3	330	NA	0.587471	NA	0.998001	NA	NA	NA	NA	NA	ccagatgggtacagtttaaaataccaattctcgaAGCAACAGCGGCAAATATAGAAGgcgg	[~]	10.75	[~]	10.873	[~]	10.509	[~]	10.615	[~]	10.383	[~]	10.122	[~]	10.049	[~]	9.744	[~]	9.994	[~]	9.078	[~]	10.933	[~]	10.858	[~]	9.15	[+]	10.158	[~]	10.007	[~]	9.936	[+]	11.275	[~]
THC0290_T_0496	1	728160	6	358	NA	0.979007	NA	0.998001	NA	NA	NA	NA	NA	agacggattaataggtttggctactagtgtaaaaAACATTCAGATAAATTATAACGAaacc	[~]	10.253	[~]	10.144	[~]	10.022	[~]	10.215	[~]	10.009	[~]	10.359	[~]	9.997	[~]	9.386	[~]	10.095	[~]	9.416	[~]	10.113	[~]	10.136	[~]	9.573	[+]	10.726	[~]	10.196	[~]	10.061	[+]	11.284	[~]
THC0290_T_0497	1	730952	77	1788	SM1	0.999667	SigA	1	21;402;475	THC0290_0595;THC0290_N_0436;THC0290_0596	gcvH;NA;fjo27	Glycine cleavage system H protein;new transcription segment;Conserved membrane protein of unknown function	THC0290_v2_0640;NA;NA	TTAtttaaaaaaaaataagattaTTACAGTAATAATTTTACATTTGTTttaaattaaaact	[+]	13.481	[+]	13.605	[+]	13.707	[+]	13.931	[+]	13.437	[+]	13.249	[+]	12.225	[+]	12.418	[+]	12.509	[+]	12.361	[+]	13.827	[+]	13.913	[+]	11.83	[~]	11.895	[+]	11.659	[+]	11.722	[+]	12.183	[+]
THC0290_T_0498	1	731782	13	382	SM2	0.408864	SigA	0.998001	22	THC0290_0597	deoC	Deoxyribose-phosphate aldolase	THC0290_v2_0642	aaaaattaaagaaaatATcccatttcgatggGATTTTTCTATTTTTATACCTttaattcgt	[-]	10.884	[-]	10.762	[-]	10.345	[-]	10.386	[-]	9.739	[-]	9.459	[-]	9.308	[-]	8.002	[-]	8.615	[~]	8.773	[-]	10.371	[-]	10.43	[-]	8.175	[~]	8.706	[-]	7.875	[-]	8.133	[~]	8.992	[~]
THC0290_T_0499	-1	735455	3	340	NA	0.708431	NA	1	453	THC0290_N_0439	NA	new transcription segment	NA	ttacaaattttaaagtaaaagttagaattattaaAGACTCCTATCAAGATTTAATGTcagg	[~]	11.479	[~]	11.733	[~]	11.571	[~]	11.828	[~]	11.276	[~]	11.451	[~]	11.177	[~]	10.071	[~]	10.506	[~]	10.33	[~]	10.928	[~]	11.096	[~]	9.505	[-]	9.369	[~]	10.258	[~]	10.533	[~]	9.872	[~]
THC0290_T_0500	-1	737777	3	777	NA	0.961346	NA	0.999334	-11	THC0290_0600	NA	Probable outer membrane efflux protein precursor	THC0290_v2_0645	gattaaattcgcTaaacaaaaaattccatattatATAAAATGCAAAAAATAAAATACtcgt	[+]	10.604	[+]	10.745	[+]	10.844	[+]	11.039	[+]	10.985	[+]	11.555	[+]	11.277	[+]	12.355	[+]	11.604	[+]	11.31	[+]	10.281	[+]	10.403	[+]	10.942	[+]	10.544	[+]	10.545	[+]	10.583	[+]	11.723	[+]
THC0290_T_0501	-1	737812	7	778	SM1	0.613795	SigA	0.94102	24	THC0290_0600	NA	Probable outer membrane efflux protein precursor	THC0290_v2_0645	AGCaagagtcttattgtaaatttAATTTATAAAAAGATTAAATTCGCTaaacaaaaaattc	[+]	10.389	[+]	10.545	[+]	10.766	[+]	10.711	[+]	10.767	[+]	11.569	[+]	11.155	[+]	11.943	[+]	11.289	[+]	11.349	[+]	10.039	[+]	10.224	[+]	11.004	[+]	10.159	[+]	10.545	[+]	10.583	[+]	11.577	[+]
THC0290_T_0502	1	737922	21	240	SM1	0.99067	SigA	0.998334	15	THC0290_0601	NA	Probable lipoprotein precursor	NA	TGTTAcaattaatgcgtaaaaataaATGAAAATTAATTTTTACATTTGCTtaaattacttt	[+]	8.644	[+]	8.725	[+]	8.639	[+]	8.644	[+]	8.641	[+]	8.807	[+]	8.198	[+]	7.197	[+]	8.906	[+]	9.033	[+]	8.468	[+]	8.621	[+]	9.604	[+]	10.595	[+]	8.809	[+]	8.589	[+]	11.16	[+]
THC0290_T_0503	-1	738653	4	1188	SM3	0.985671	SigA	0.997001	NA	NA	NA	NA	NA	catttaagacctacgGTCatagaaacggctTTTTTTTCTAAATTAGCttcggtagcatata	[-]	4.322	[-]	4.375	[-]	3.796	[-]	3.819	[~]	4.047	[~]	4.247	[-]	3.859	[~]	5.977	[~]	3.886	[~]	4.274	[-]	3.85	[~]	3.906	[~]	5.023	[-]	4.157	[-]	3.914	[~]	3.8	[-]	3.843	[-]
THC0290_T_0504	1	741499	3	1163	SM1	0.827058	SigA	0.997667	NA	NA	NA	NA	NA	TTcttatagatatcattgcctaGAAATCCGAGTACTGTAATTTTGTTtataagagaaacgg	[+]	5.73	[+]	5.301	[+]	5.554	[+]	6.179	[+]	6.017	[+]	5.616	[+]	6.251	[-]	7.115	[+]	7.542	[+]	6.468	[+]	5.752	[+]	6.002	[+]	6.395	[+]	9.334	[+]	7.923	[+]	7.197	[+]	10.333	[+]
THC0290_T_0505	-1	741802	4	522	NA	0.691103	NA	0.7011	64;142	THC0290_N_0443;THC0290_0605	NA;NA	new transcription segment;Protein of unknown function	NA;NA	gcagttgcaggaacaattgtattcttaattatttatttagtatttattttgctagttgaag	[-]	6.913	[-]	6.387	[-]	5.977	[-]	5.12	[-]	5.657	[-]	5.823	[-]	6.594	[-]	6.662	[-]	4.3	[-]	5.421	[-]	5.653	[-]	5.816	[-]	7.511	[-]	4.773	[-]	4.378	[-]	4.362	[-]	5.336	[-]
THC0290_T_0506	-1	742099	8	678	NA	0.878707	NA	0.94002	10;361;439	THC0290_0606;THC0290_N_0443;THC0290_0605	NA;NA;NA	Probable transmembrane protein of unknown function;new transcription segment;Protein of unknown function	NA;NA;NA	tgtttgtatttacattcttctacctagtttaattTTAATATAAGAAAAATATATATTgtta	[~]	13.951	[~]	13.901	[~]	13.775	[~]	13.84	[~]	13.684	[~]	13.398	[~]	13.231	[~]	14.194	[~]	13.188	[~]	12.807	[~]	13.519	[~]	13.383	[~]	11.797	[~]	11.662	[~]	12.297	[~]	12.541	[~]	11.368	[~]
THC0290_T_0507	-1	742627	15	621	NA	0.984339	NA	1	NA	NA	NA	NA	NA	ctatattacaaTTCGaaaaaattgacaaagaacaTTCAACAGCTGATAATATTGTGTacaa	[~]	13.995	[~]	14.015	[~]	13.701	[~]	13.912	[~]	13.765	[~]	13.292	[~]	13.496	[~]	13.644	[~]	13.281	[~]	12.778	[~]	13.618	[~]	13.619	[~]	11.678	[~]	11.778	[~]	12.501	[~]	12.75	[~]	11.814	[~]
THC0290_T_0508	-1	743144	214	1855	SM2	0.868044	SigA	0.992336	19	THC0290_0607	NA	Cytochrome c oxidase family protein	THC0290_v2_0652	tgtttttatttttataTTTCgtaaaataataAAAAATTGTAAATTTGACAACTTTAtaaac	[+]	13.828	[+]	13.728	[+]	13.461	[+]	13.672	[+]	13.554	[+]	12.996	[+]	13.315	[+]	13.324	[+]	13.191	[+]	12.766	[+]	13.272	[+]	13.304	[+]	12.021	[+]	12.24	[+]	12.446	[+]	12.616	[+]	12.983	[+]
THC0290_T_0509	-1	743155	20	1856	NA	0.442852	NA	-1	30	THC0290_0607	NA	Cytochrome c oxidase family protein	THC0290_v2_0652	ttgggtatatttgtttttatttttATATTTCGtaaaataataaaaaattgtaaatttgaca	[+]	13.763	[+]	13.744	[+]	13.504	[+]	13.682	[+]	13.64	[+]	13.099	[+]	13.445	[+]	13.367	[+]	13.337	[+]	12.81	[+]	13.371	[+]	13.467	[+]	12.1	[+]	12.191	[+]	12.448	[+]	12.676	[+]	12.957	[+]
THC0290_T_0510	-1	744683	11	1362	SM1	0.903366	SigA	1	25	THC0290_0609	cyoE	Protoheme IX farnesyltransferase	THC0290_v2_0654	TAAagatattagatttgaatattCCTATTGGTTATACCTATATTTGCAaagttttaaaaaa	[+]	10.179	[+]	9.95	[+]	9.711	[+]	9.719	[+]	9.861	[+]	10.448	[+]	10.212	[+]	9.67	[+]	10.417	[+]	10.559	[+]	9.899	[+]	9.606	[+]	10.479	[+]	10.026	[+]	9.974	[+]	10.316	[+]	9.139	[+]
THC0290_T_0511	1	744812	4	675	SM1	0.993669	SigA	1	30	THC0290_0610	NA	Peptidase, M22 family	THC0290_v2_0655	AAAATgacttagtatgataagcatGGTTATATTAATTTCTAACTTTGTAactttgcttttt	[+]	10.193	[+]	10.221	[+]	10.124	[+]	10.266	[+]	10.751	[+]	10.704	[+]	11.035	[+]	11.286	[+]	11.548	[+]	11.672	[+]	10.181	[+]	10.275	[+]	12.061	[+]	12.006	[+]	11.571	[+]	11.345	[+]	12.579	[+]
THC0290_T_0512	-1	745616	33	1232	NA	0.916694	NA	0.974009	106	THC0290_N_0444	NA	new transcription segment	NA	atagataatgccgtaGAAACagtaaaagaaaagGCTGGCGATTTAATAGAAAAAGTAGaag	[~]	10.664	[~]	10.909	[~]	12.441	[~]	12.592	[~]	13.341	[~]	13.693	[~]	13.847	[~]	14.113	[~]	13.527	[~]	13.624	[~]	12.065	[~]	12.32	[~]	14.074	[~]	13.73	[~]	13.802	[~]	13.833	[~]	14.674	[~]
THC0290_T_0513	-1	745887	123	731	SM1	0.995002	SigA	1	23;377	THC0290_0611;THC0290_N_0444	NA;NA	Protein of unknown function;new transcription segment	NA;NA	TTTtaacaatttagaaatataatTTAACTAAAATTATGTATTTTTACAtgaataactaaaa	[+]	11.323	[+]	11.586	[+]	12.516	[+]	12.565	[+]	13.319	[+]	14.392	[+]	13.548	[+]	13.248	[+]	13.171	[+]	14.265	[+]	12.201	[+]	12.394	[+]	14.822	[+]	13.892	[+]	13.541	[+]	13.743	[+]	14.733	[+]
THC0290_T_0514	-1	748042	13	222	SM1	0.946684	SigA	0.999	66	THC0290_0612	yyaL	Protein of unknown function YyaL	THC0290_v2_0657	AAAacacatttcaaactaaaaaaACCCACATAAAATCATAAATTAGCGtttcaaaatttga	[-]	9.875	[-]	9.704	[-]	9.952	[-]	9.787	[-]	9.815	[-]	10.701	[-]	10.369	[-]	7.879	[-]	9.804	[-]	10.436	[-]	10.014	[-]	9.821	[-]	10.268	[-]	9.529	[-]	9.636	[-]	9.086	[-]	9.122	[-]
THC0290_T_0515	-1	749015	11	746	SM1	0.812729	SigA	1	13	THC0290_0613	NA	Protein of unknown function	THC0290_v2_0658	TTATtgcaaaattaagtgtcataaACCAAATAGGTTTCTTAATTTTGCAtaaaatataaaa	[+]	10.787	[+]	10.785	[+]	10.843	[+]	10.691	[+]	11.165	[+]	11.76	[+]	12.184	[+]	9.023	[+]	12.517	[+]	13.073	[+]	11.055	[+]	10.726	[+]	12.547	[+]	12.526	[+]	11.971	[+]	11.747	[+]	13.129	[+]
THC0290_T_0516	1	749439	38	1046	SM1	1	SigA	1	1;81	THC0290_N_0445;THC0290_0614	NA;NA	new transcription segment;Protein of unknown function precursor	NA;NA	AAAAaaaagtataattagaaaaacTTTCGTAAAAAATTATATCTTTGAAcgttttgaaaaa	[+]	10.562	[+]	10.49	[+]	11.061	[+]	10.982	[+]	11.371	[+]	11.934	[+]	11.259	[+]	10.905	[+]	11.152	[+]	11.824	[+]	11.132	[+]	11.163	[+]	12.021	[+]	11.54	[+]	10.814	[+]	11.102	[+]	12.377	[+]
THC0290_T_0517	-1	752240	30	1324	SM1	0.664112	SigA	0.998667	0	THC0290_0616	murI	Glutamate racemase	THC0290_v2_0662	ATTaaaaaactgtgctacaaaatAGCGCAGTTTTTTTTTACATTTGTttcatgagcaacaa	[-]	9.266	[-]	9.38	[-]	9.375	[-]	8.919	[-]	8.629	[-]	9.276	[-]	8.514	[-]	7.555	[~]	8.859	[~]	9.29	[-]	9.439	[-]	9.149	[-]	9.555	[-]	9.566	[-]	8.564	[-]	8.046	[~]	9.996	[~]
THC0290_T_0518	-1	753817	6	175	SM4	0.999334	Sig54	0.999334	6	THC0290_0618	skp	Outer membrane chaperone precursor Skp (OmpH)	THC0290_v2_0664	AggtcaacaattttaattatatTTGGCACGATAGTTGAATTTaacattatacgcttatgaa	[~]	12.902	[~]	12.784	[~]	12.403	[~]	12.196	[~]	11.308	[+]	11.375	[+]	11.503	[+]	11.283	[+]	10.397	[+]	10.787	[+]	12.476	[~]	12.463	[+]	12.114	[~]	12.207	[~]	12.305	[~]	12.289	[+]	12.164	[+]
THC0290_T_0519	-1	756710	29	720	SM2	0.657781	SigA	0.98967	189	THC0290_0619	bamA	Outer membrane protein assembly complex precursor, BamA	THC0290_v2_0665	ttcaatagattctATTGacgattcaatatTAAATAAGCATCTTTACACGCATAAtctacct	[~]	11.002	[+]	11.368	[+]	10.846	[+]	10.67	[+]	9.973	[+]	10.294	[+]	10.124	[+]	10.963	[~]	10.929	[+]	10.987	[~]	11.078	[~]	11.013	[+]	12.579	[+]	12.758	[+]	11.855	[+]	11.868	[+]	12.315	[+]
THC0290_T_0520	-1	757949	15	721	SM2	0.999334	SigA	1	14	THC0290_0621	NA	Protein of unknown function precursor, putative outer membrane protein	NA	ggataacaaatttcaCTTTgttaagtgttcAGAATTAGTATATTTGCACCCTTATtaaaaa	[+]	11.224	[+]	11.168	[+]	10.666	[+]	10.646	[~]	9.964	[~]	10.111	[+]	10.016	[+]	9.569	[+]	11.237	[~]	11.191	[+]	11.037	[+]	10.828	[+]	11.941	[+]	12.127	[+]	11.596	[+]	11.615	[+]	12.476	[+]
THC0290_T_0521	-1	758025	4	511	SM6	0.829723	SigECF	0.829723	1;90	THC0290_N_0450;THC0290_0621	NA;NA	new transcription segment;Protein of unknown function precursor, putative outer membrane protein	NA;NA	attaattttacccaaaaATACTacaacacctcttTTTTCGTTTCTACATTAataccagaaa	[-]	8.863	[-]	8.867	[-]	8.911	[-]	8.587	[-]	8.569	[-]	9.21	[-]	8.699	[~]	8.145	[-]	10.066	[~]	10.992	[-]	9.131	[-]	9.189	[+]	11.755	[~]	10.815	[~]	10.407	[~]	10.53	[~]	10.63	[+]
THC0290_T_0522	-1	759919	4	944	SM1	0.96901	SigA	0.999334	0;228	THC0290_N_0452;THC0290_0623	NA;NA	new transcription segment;Protein of unknown function	NA;THC0290_v2_0669	AATacaaactaaaacaagcttagTAACTTATTTTTTAATTATTTTGCAgtagattatttta	[+]	9.423	[+]	9.298	[+]	9.62	[+]	9.546	[+]	9.565	[+]	9.983	[+]	9.629	[+]	10.24	[+]	10.382	[+]	10.511	[+]	9.829	[+]	9.812	[+]	10.809	[+]	11.205	[+]	10.425	[+]	10.459	[+]	11.913	[+]
THC0290_T_0523	1	759980	5	441	SM3	0.547484	SigA	0.958014	22	THC0290_0624	pdxJ	Pyridoxal phosphate biosynthetic protein PdxJ	THC0290_v2_0670	aattaaaaaataaGTtactaagcttgtTTTAGTTTGTATTTTTGTcatttataactacaaa	[+]	10.005	[+]	10.129	[+]	9.988	[+]	9.971	[+]	10.19	[+]	10.735	[+]	10.456	[+]	9.993	[+]	10.802	[+]	11.301	[+]	10.048	[+]	10.093	[+]	11.134	[+]	10.652	[+]	10.528	[+]	10.534	[+]	10.521	[+]
THC0290_T_0524	1	760414	4	1285	SM1	0.98867	SigA	0.999	317	THC0290_N_0453	NA	new transcription segment	NA	AATTacacaagaatttcagcgccaTAACATTCGAGTTTCTATATTTGTAgatccagtgctc	[~]	9.771	[~]	9.788	[-]	9.621	[~]	9.898	[~]	10.157	[~]	10.034	[~]	10.405	[~]	11.105	[~]	10.681	[~]	10.509	[~]	9.763	[-]	9.714	[~]	10.244	[~]	10.124	[~]	10.38	[~]	10.576	[~]	9.542	[~]
THC0290_T_0525	1	762355	8	26	SM1	0.917361	SigA	0.999	17	THC0290_0627	NA	Probable hydrolase	THC0290_v2_0673	AAGtttttaaaaataagctttttTAAAAATTAAACAATTATTTTTGCGgtataaaatataa	[+]	9.867	[+]	9.779	[+]	9.596	[+]	9.57	[+]	9.782	[+]	9.853	[+]	10.443	[+]	8.823	[+]	10.002	[+]	10.066	[+]	9.477	[+]	9.523	[+]	10.159	[+]	9.35	[+]	9.429	[+]	9.614	[~]	9.499	[+]
THC0290_T_0526	1	763669	388	1833	SM2	0.997667	SigA	0.999	28	THC0290_0629	tig	Trigger factor (TF)	THC0290_v2_0675	caataagttaaaaaTTTGttgggtggtatAAATTTTGTAATTTTGCCACCCAATtttatta	[+]	14.004	[~]	13.948	[~]	13.327	[~]	13.311	[-]	12.468	[-]	12.195	[-]	12.47	[-]	12.038	[-]	11.584	[-]	12.352	[~]	13.408	[~]	13.282	[~]	12.31	[~]	12.39	[~]	12.382	[-]	12.474	[~]	12.133	[~]
THC0290_T_0527	1	763682	21	1834	SM2	0.999667	SigA	1	15	THC0290_0629	tig	Trigger factor (TF)	THC0290_v2_0675	aTTTGttgggtggtatAAATTTTGTAATTTTGCCACCCAATtttattatgtaaattaaaga	[+]	13.937	[+]	13.9	[+]	13.279	[+]	13.25	[+]	12.467	[+]	12.404	[+]	12.535	[+]	12.017	[+]	11.554	[+]	12.435	[+]	13.391	[+]	13.234	[+]	12.49	[+]	12.324	[+]	12.369	[+]	12.451	[~]	12.081	[+]
THC0290_T_0528	1	764900	37	1432	NA	0.746751	NA	0.992669	122;150;365	THC0290_N_0457;THC0290_N_0458;THC0290_0630	NA;NA;clpP	new transcription segment;new transcription segment;S14 family, ATP-dependent Clp protease proteolytic subunit	NA;NA;THC0290_v2_0676	accaagaagtaGaaggaattgtagcaagagttTTGTCAAACCAAGAAGAAGTAAaaagatt	[~]	14.708	[~]	14.506	[~]	13.896	[~]	13.679	[~]	12.712	[~]	13.689	[~]	12.896	[~]	12.448	[~]	12.548	[~]	13.375	[~]	14.263	[~]	13.8	[~]	12.931	[~]	12.276	[~]	12.727	[~]	12.781	[~]	11.975	[~]
THC0290_T_0529	1	765050	20	124	SM1	0.956681	SigA	0.998667	-28;0;215	THC0290_N_0457;THC0290_N_0458;THC0290_0630	NA;NA;clpP	new transcription segment;new transcription segment;S14 family, ATP-dependent Clp protease proteolytic subunit	NA;NA;THC0290_v2_0676	TTGcagcaatgtacggcgaataaATAATAAAAAAAGATTATCTTTGAAacgtcagaaattt	[-]	11.001	[-]	10.852	[-]	10.691	[-]	10.695	[-]	10.824	[-]	11.713	[-]	11.143	[-]	10.183	[-]	11.217	[-]	11.673	[-]	10.844	[-]	10.768	[-]	11.44	[-]	11.03	[-]	11.189	[-]	10.881	[-]	10.443	[-]
THC0290_T_0530	1	767007	16	1331	NA	0.543819	NA	0.955015	268;499	THC0290_N_0461;THC0290_0632	NA;NA	new transcription segment;Putative Sec-independent protein translocase (twin-arginine translocation protein)	NA;THC0290_v2_0678	atggatccgctagataaagaaaccttgcgtgctattTTGACACAACCCAAAAATGCTTtaa	[~]	12.981	[~]	12.741	[~]	12.636	[~]	12.777	[~]	12.579	[~]	12.717	[~]	12.35	[~]	12.529	[-]	11.128	[~]	10.975	[~]	12.85	[~]	12.873	[~]	10.588	[~]	9.793	[~]	11.081	[~]	11.169	[-]	9.828	[~]
THC0290_T_0531	1	767488	15	641	SM1	0.963012	SigA	0.999334	18;386	THC0290_0632;THC0290_0633	NA;NA	Putative Sec-independent protein translocase (twin-arginine translocation protein);Probable membrane-associated phospholipid phosphatase	THC0290_v2_0678;THC0290_v2_0679	AAACATttgttgtctgtcgatatcaATTTAAAAAACTTTGTAACTTTGTAttttaaaattc	[~]	11.668	[~]	11.372	[~]	10.983	[~]	11.126	[~]	11.18	[~]	11.501	[~]	11.323	[~]	12.013	[+]	11.304	[+]	12.006	[~]	11.068	[~]	10.888	[+]	13.959	[+]	13.6	[+]	12.269	[+]	12.162	[+]	15.011	[+]
THC0290_T_0532	1	769221	90	1363	SM1	0.847384	SigA	1	0	THC0290_0635	rlmN	Ribosomal RNA large subunit methyltransferase N	THC0290_v2_0681	TTAccaaaacaacaaattactaaATCAACAAAATAACCTAAATTTGCAccatgcaaatcga	[+]	10.399	[+]	10.537	[+]	10.17	[+]	10.251	[+]	10.5	[+]	10.749	[+]	10.61	[+]	9.586	[+]	11.575	[+]	12.133	[+]	10.087	[+]	10.31	[+]	10.787	[+]	10.111	[+]	10.399	[+]	10.493	[+]	9.957	[+]
THC0290_T_0533	-1	770397	3	42	SM2	0.434522	SigA	0.95968	NA	NA	NA	NA	NA	taaaggagttatatcaTTTgttagaaattctCATATTGCTACATTAGACTACGgaaacgga	[-]	5.762	[-]	6.038	[-]	7.609	[-]	7.853	[-]	8.537	[-]	8.961	[-]	8.797	[~]	10.197	[-]	11.74	[-]	10.938	[-]	7.414	[-]	7.537	[-]	11.417	[-]	11.124	[-]	11.412	[-]	11.323	[-]	11.94	[-]
THC0290_T_0534	-1	771226	8	1034	NA	0.419527	NA	0.798401	24	THC0290_0636	NA	Probable lipoprotein precursor	NA	aattttttcatatctgattaaacctttttaaaaaaACGATGTCTTACCAACAaacctttta	[+]	7.685	[+]	7.88	[+]	9.543	[+]	9.761	[+]	10.687	[+]	11.021	[+]	10.978	[+]	9.799	[+]	13.201	[+]	12.771	[+]	8.979	[+]	9.389	[+]	12.851	[+]	12.7	[+]	12.957	[+]	12.832	[+]	14.504	[+]
THC0290_T_0535	1	771302	26	964	SM1	0.858714	SigA	1	5	THC0290_0637	NA	Polyprenyl synthetase	THC0290_v2_0683	AGGtttaatcagatatgaaaaaaTTAATACTTAAATGCTATCTTTGAAtcgctatatggat	[+]	9.811	[+]	9.783	[+]	9.97	[+]	10.007	[+]	10.154	[+]	10.051	[+]	10.234	[+]	8.03	[+]	10.738	[+]	10.408	[+]	10.029	[+]	9.965	[+]	10.867	[+]	11.467	[+]	10.147	[+]	9.934	[+]	11.885	[+]
THC0290_T_0536	1	774909	5	1524	SM1	0.738421	SigA	0.999667	26	THC0290_0641	NA	Protein of unknown function precursor	NA	ATTGacaatctaatgtttgaaagaTATGTGTATTTTTCGTTCCTTTGCAtgcaccaaatta	[+]	10.094	[+]	9.843	[+]	9.462	[+]	9.212	[+]	8.887	[+]	9.163	[+]	8.644	[+]	8.377	[+]	8.898	[+]	9.538	[+]	9.367	[+]	9.33	[+]	10.808	[+]	10.584	[+]	9.493	[+]	9.238	[+]	11.003	[+]
THC0290_T_0537	1	777699	7	1837	SM1	0.625791	SigA	0.999	1;64	THC0290_N_0466;THC0290_0643	NA;dnaG	new transcription segment;DNA primase	NA;THC0290_v2_0689	TTTtcttctttattttgaaatatAAATTTTGAATTATGTATTTTTACAgcctttcaaaata	[+]	9.659	[+]	9.741	[+]	9.232	[+]	9.071	[+]	8.403	[+]	8.358	[+]	8.229	[~]	8.109	[+]	9.005	[+]	8.975	[+]	9.601	[+]	9.569	[~]	9.018	[~]	9.905	[+]	8.055	[+]	8.12	[~]	8.542	[~]
THC0290_T_0538	-1	780455	15	1019	SM1	1	SigA	1	-50;37	THC0290_N_0469;THC0290_0644	NA;NA	new transcription segment;Two-component system response regulatory protein, LuxR family	NA;THC0290_v2_0690	TTTaccaactgattatcaatttgTTATAAAATATTATATACCTTTACCgttcgttaacttt	[-]	8.395	[-]	8.358	[~]	8.936	[~]	9.322	[+]	10.79	[+]	11.122	[+]	11.445	[+]	12.478	[+]	13.167	[+]	13.395	[-]	8.764	[~]	8.787	[+]	14.033	[+]	13.622	[+]	13.04	[+]	13.016	[+]	13.464	[+]
THC0290_T_0539	-1	781343	17	1528	SM1	0.963012	SigA	0.999	31	THC0290_0645	nadE	NH(3)-dependent NAD(+) synthetase	THC0290_v2_0691	AAAAgattgaaacgtatagctggaATTGCTCCTAATTATTATTTTTGCAaatatacattcg	[+]	10.286	[+]	10.506	[+]	10.103	[+]	10.296	[+]	10.119	[+]	10.133	[+]	9.79	[~]	8.095	[+]	10.012	[+]	10.336	[+]	10.238	[+]	10.315	[+]	10.539	[+]	10.458	[+]	9.463	[+]	9.349	[~]	10.619	[+]
THC0290_T_0540	1	782547	7	509	NA	0.283239	NA	0.798401	270	THC0290_N_0472	NA	new transcription segment	NA	cttctgaaataaaatttaacgtacaactagacgaAAATCGTGTTCCTGagaaactgcattg	[~]	10.077	[~]	10.137	[~]	10.063	[~]	10.15	[~]	10.572	[~]	10.156	[~]	10.729	[~]	11.124	[~]	10.925	[~]	10.68	[~]	9.93	[~]	10.027	[~]	10.852	[~]	11.01	[~]	11.177	[~]	11.236	[~]	10.504	[~]
THC0290_T_0541	-1	784399	119	429	SM1	0.842386	SigA	1	25	THC0290_0649	pcbD	Probable 2-hydroxy-6-oxo-6-phenylhexa-2,4-dienoic acid hydrolase	THC0290_v2_0695	TATaaaaaagacaatatttatatTTCGTATTTTAGTCCTATATTTGCAcctatttaaagac	[+]	10.274	[+]	10.326	[+]	9.893	[+]	9.749	[+]	9.782	[+]	10.698	[+]	10.021	[+]	10.14	[+]	10.272	[+]	11.627	[+]	9.907	[+]	9.932	[+]	11.696	[+]	10.597	[+]	10.295	[+]	10.271	[+]	10.872	[+]
THC0290_T_0542	1	784588	102	976	SM1	0.984339	SigA	1	23	THC0290_0650	mraZ	Protein MraZ	THC0290_v2_0696	AAAgtggtattttgtggtaaaagGTGGTAAAAAATATTTATATTTGCTaactatcatgtaa	[+]	10.796	[+]	10.739	[+]	10.466	[+]	10.57	[+]	11.193	[+]	10.538	[+]	11.365	[+]	11.615	[+]	11.579	[+]	11.482	[+]	10.344	[+]	10.643	[+]	11.222	[+]	11.236	[+]	11.059	[+]	10.899	[+]	11.251	[+]
THC0290_T_0543	1	785102	10	1702	NA	0.949683	NA	0.999667	-10	THC0290_0651	mraW	S-adenosyl-methyltransferase MraW	THC0290_v2_0697	aacgtaaatgacgatgaatatggaatatcataatCCAGTTTTGCTAAAAGAAACAGTCGat	[~]	10.717	[-]	10.679	[-]	10.161	[~]	10.428	[-]	10.858	[-]	10.064	[~]	11.138	[-]	11.3	[-]	11.289	[-]	10.96	[~]	10.197	[-]	10.276	[~]	10.926	[~]	11.3	[~]	11.072	[~]	10.939	[~]	11.975	[~]
THC0290_T_0544	-1	790884	19	723	SM3	0.942019	SigA	1	1	THC0290_N_0475	NA	new transcription segment	NA	taagaaaattcttcTTCcttcgccgaaacgTTTTTTTGTATATTTGAagtacgaaacttgt	[~]	3.758	[~]	3.76	[~]	4.949	[~]	3.802	[~]	4.922	[+]	7.662	[~]	5.074	[-]	7.104	[+]	6.24	[+]	9.253	[~]	5.055	[~]	4.681	[+]	10.319	[+]	8.325	[+]	7.403	[+]	5.625	[+]	8.208	[+]
THC0290_T_0545	1	794279	3	53	NA	0.983672	NA	0.998001	NA	NA	NA	NA	NA	tgtgtggcttacGAaaatttggaacaattttttcCAAAAGATAAAATGATATTAACTggaa	[~]	10.353	[~]	10.252	[~]	9.755	[~]	9.854	[~]	10.04	[~]	9.137	[~]	10.24	[~]	8.225	[~]	9.246	[~]	8.805	[~]	9.88	[~]	10.049	[+]	9.072	[+]	9.335	[~]	9.216	[~]	9.161	[~]	7.884	[~]
THC0290_T_0546	1	796519	83	1218	SM1	0.963346	SigA	0.997667	495	THC0290_0661	ftsA	Cell division protein FtsA	THC0290_v2_0707	TAATttcggtggcactttcagtaTCCAAAAAGATAGGGTAAATTTGAAaaatattgagcaa	[~]	11.963	[~]	12.095	[~]	11.862	[+]	11.937	[+]	12.464	[+]	12.736	[~]	12.224	[+]	13.149	[+]	12.796	[+]	12.75	[+]	12.052	[+]	12.145	[+]	12.093	[+]	11.591	[+]	11.701	[+]	11.732	[+]	11.643	[+]
THC0290_T_0547	1	797757	3	1310	NA	0.659447	NA	1	NA	NA	NA	NA	NA	gtagttccttttggtggaaaCGTAATTACCGAAGACATAAAAGaaggttgttcaatcatag	[-]	12.67	[-]	12.398	[-]	11.887	[-]	11.829	[-]	12.264	[-]	11.989	[-]	12.44	[-]	10.952	[-]	11.799	[-]	11.732	[-]	12.231	[-]	12.166	[~]	10.966	[~]	10.937	[~]	11.484	[~]	11.607	[-]	10.914	[~]
THC0290_T_0548	1	800557	3	455	SM1	0.508497	SigA	0.998667	1;216	THC0290_N_0481;THC0290_0663	NA;NA	new transcription segment;Protein of unknown function	NA;THC0290_v2_0709	acctacaaaataagtaccaaaataTAAATTTATTTTTACTAAATTTGTCgagccaattcct	[-]	11.045	[-]	10.938	[-]	10.496	[-]	10.449	[-]	10.408	[-]	11.24	[-]	10.788	[-]	9.764	[-]	11.009	[-]	10.898	[-]	10.684	[-]	10.502	[-]	10.576	[~]	10.501	[-]	10.634	[-]	10.39	[-]	10.33	[-]
THC0290_T_0549	1	800755	5	1799	NA	0.479174	NA	0.958014	18;468	THC0290_0663;THC0290_N_0482	NA;NA	Protein of unknown function;new transcription segment	THC0290_v2_0709;NA	agatataagatttcattttttttgaaatcccatcTGCCATCTAAAATCtgtcatctaaaat	[+]	14.106	[+]	14.018	[+]	13.929	[+]	13.813	[+]	13.716	[+]	14.24	[+]	13.888	[+]	12.464	[+]	13.483	[+]	13.268	[+]	14.183	[+]	14.079	[+]	13.214	[+]	12.289	[+]	13.023	[+]	13	[+]	12.547	[+]
THC0290_T_0550	1	800791	3	1800	NA	0.749417	NA	0.998667	-18;432	THC0290_0663;THC0290_N_0482	NA;NA	Protein of unknown function;new transcription segment	THC0290_v2_0709;NA	ccatctaaaatctgtcatctaaaatcaaaaaaatGAGTTTATCAACACACATCATGGACga	[+]	14.126	[+]	14.17	[+]	14.116	[+]	13.888	[+]	13.825	[+]	14.264	[+]	13.888	[+]	12.641	[+]	13.483	[+]	13.268	[+]	14.249	[+]	14.259	[+]	13.214	[~]	12.289	[+]	13.023	[+]	13	[+]	12.616	[+]
THC0290_T_0551	1	801293	715	756	NA	0.752083	NA	0.792069	0;100	THC0290_tRNA_0013;THC0290_0664	NA;NA	transfer RNA-Arg;Probable transmembrane protein of unknown function	NA;NA	acgaattacaatttttataattcgtaatttcaaattcgaaataaagcaatggctgcgtagt	[~]	9.583	[~]	9.728	[-]	8.925	[~]	9.126	[~]	9.634	[~]	9.541	[~]	9.535	[~]	10.638	[~]	9.605	[~]	10.066	[-]	9.078	[-]	9.123	[~]	9.398	[~]	9.258	[~]	8.995	[~]	8.92	[~]	9.595	[~]
THC0290_T_0552	-1	802877	106	161	SM1	0.969344	SigA	0.999667	18	THC0290_0665	rpe	Ribulose-phosphate 3-epimerase	THC0290_v2_0711	gAACTTTacaaaaatatttgcgcactTTACAGTTAAATCCTTATTTTTGCAaaaactacaa	[+]	11.967	[+]	11.999	[+]	11.796	[+]	11.78	[+]	11.584	[+]	12.136	[+]	11.837	[+]	10.301	[+]	11.999	[+]	12.027	[+]	12.054	[+]	11.638	[+]	12.151	[+]	11.975	[+]	11.329	[+]	11.005	[+]	12.573	[+]
THC0290_T_0553	-1	803306	1857	532	NA	0.842053	NA	0.998667	-12;66;447	THC0290_N_0486;THC0290_N_0485;THC0290_0665	NA;NA;rpe	new transcription segment;new transcription segment;Ribulose-phosphate 3-epimerase	NA;NA;THC0290_v2_0711	cctcaagaagtaaaatcttgaaaacgtatttagGATAACCCTAAAACCGATAACTAACagt	[-]	6.521	[-]	6.673	[-]	5.895	[-]	5.827	[-]	5.361	[-]	6.014	[-]	6.24	[-]	5.262	[-]	6.315	[-]	8.465	[-]	5.533	[-]	5.205	[-]	7.174	[-]	4.691	[-]	5.896	[-]	6.514	[-]	5.631	[-]
THC0290_T_0554	-1	803841	6	1519	NA	0.862046	NA	0.997334	NA	NA	NA	NA	NA	cgtggtttcaaattcatttcgtatgccgtttggtGGATCCGTCAATCAATACTACAAgcat	[~]	12.475	[~]	12.443	[~]	12.51	[~]	12.503	[~]	12.767	[~]	12.947	[~]	13.283	[~]	12.076	[~]	13.639	[~]	13.421	[~]	12.586	[~]	12.43	[~]	13.579	[~]	13.172	[~]	13.647	[~]	13.553	[~]	12.968	[~]
THC0290_T_0555	-1	803913	8	1311	NA	0.779407	NA	0.995668	NA	NA	NA	NA	NA	cttacccttccagatttaatcaatgaaggaaatTTAGGCCTAATAAAAGCAGCACAACgat	[~]	12.403	[~]	12.427	[~]	12.305	[~]	12.305	[~]	12.489	[-]	12.433	[~]	12.997	[~]	11.648	[~]	13.213	[~]	12.825	[~]	12.145	[~]	12.235	[~]	12.953	[~]	12.856	[~]	13.333	[~]	13.179	[~]	12.808	[~]
THC0290_T_0556	-1	804213	101	551	NA	0.492502	NA	0.687771	31	THC0290_0666	rpoD	RNA polymerase sigma-70 factor RpoD	THC0290_v2_0713	ttaatttaaaaaaatgtAACtttttgcaaactcatTACGTATAACCACTTGTACacttata	[+]	12.413	[+]	12.252	[+]	12.047	[+]	12.168	[+]	12.27	[+]	12.168	[+]	12.582	[+]	11.442	[+]	13.012	[+]	12.643	[+]	12.119	[+]	12.18	[+]	13.008	[+]	12.913	[+]	13.18	[+]	13.088	[+]	12.675	[+]
THC0290_T_0557	-1	804673	3	896	SM1	0.994668	SigA	0.999334	491	THC0290_0666	rpoD	RNA polymerase sigma-70 factor RpoD	THC0290_v2_0713	ATTcctgtctgaaccgccaaattTAAAAAAATAACCATTATTTTTATTataggatatgtga	[~]	5.508	[-]	4.761	[~]	5.28	[~]	5.062	[~]	5.182	[~]	6.061	[~]	5.212	[~]	5.676	[+]	6.728	[+]	6.767	[~]	5.582	[~]	4.928	[+]	8.569	[+]	8.798	[~]	6.318	[+]	6.168	[+]	9.253	[+]
THC0290_T_0558	1	804712	70	335	SM1	0.885372	SigA	0.995335	183	THC0290_N_0488	NA	new transcription segment	NA	ATcacatatcctataataaaaaTAATGGTTATTTTTTTAAATTTGGCggttcagacaggaa	[~]	9.212	[~]	9.089	[~]	9.174	[~]	9.051	[~]	8.88	[~]	8.547	[~]	8.83	[~]	8.989	[~]	10.055	[~]	9.114	[~]	9.174	[~]	9.167	[~]	9.606	[~]	11.199	[~]	10.267	[~]	9.802	[~]	12.099	[~]
THC0290_T_0559	-1	807662	31	1566	SM2	0.945018	SigA	1	1;50;317;346	THC0290_N_0491;THC0290_0669;THC0290_N_0490;THC0290_N_0489	NA;rpsO;NA;NA	new transcription segment;30S ribosomal protein S15;new transcription segment;new transcription segment	NA;THC0290_v2_0716;NA;NA	taataagtaaaaacATTGccacatcaaaaATAAAGTGTAATTTTGCACTCGAATccgagaa	[+]	13.882	[+]	13.991	[+]	13.674	[+]	13.661	[+]	13.449	[+]	14.372	[+]	13.117	[+]	13.666	[+]	13.998	[+]	14.713	[+]	14.063	[+]	13.795	[+]	15.112	[+]	13.818	[+]	13.795	[+]	13.998	[+]	13.222	[+]
THC0290_T_0560	-1	815377	15	724	NA	0.918694	NA	0.991669	234;373	THC0290_N_0494;THC0290_0676	NA;NA	new transcription segment;Protein of unknown function	NA;NA	cttatgttgggGCAGaaacagaccacacggtaatTCCGTTTGGCAAAGGAATTTGCGgaca	[~]	11.709	[~]	11.858	[~]	11.817	[~]	11.954	[~]	12.328	[~]	12.177	[~]	12.643	[~]	13.832	[~]	12.145	[~]	12.279	[~]	11.557	[~]	11.691	[~]	12.019	[~]	11.917	[~]	12.487	[~]	12.646	[~]	11.516	[~]
THC0290_T_0561	-1	815614	37	5	SM1	0.981673	SigA	0.996335	15;471	THC0290_0677;THC0290_N_0494	NA;NA	Protein of unknown function;new transcription segment	THC0290_v2_0724;NA	TTTTTaacaaatttatataaaatttAGAACTAGCTTTAAATACTTTTGTAtaaaaattaga	[+]	11.085	[+]	11.116	[+]	11.211	[+]	11.153	[+]	11.333	[+]	11.394	[+]	11.547	[+]	12.154	[+]	11.361	[+]	11.233	[+]	10.858	[+]	10.955	[+]	11.455	[+]	11.593	[+]	11.803	[+]	11.965	[+]	11.07	[+]
THC0290_T_0562	1	816684	21	846	SM1	0.990003	SigA	1	36;402;454	THC0290_0680;THC0290_N_0495;THC0290_0681	NA;NA;NA	Protein of unknown function;new transcription segment;Probable TonB-dependent outer membrane receptor precursor	NA;NA;THC0290_v2_0728	ATAacaaatcattggcttttgtcTTTAAGTTAATTAGTTAACTTTACAacgtgaaaattag	[+]	8.73	[+]	8.718	[+]	8.903	[+]	8.999	[+]	9.873	[+]	9.726	[+]	10.671	[+]	11.632	[+]	10.75	[+]	10.604	[+]	8.672	[+]	8.731	[+]	12.094	[+]	12.184	[+]	11.862	[+]	11.863	[+]	11.879	[+]
THC0290_T_0563	1	817717	5	1346	NA	0.423859	NA	0.956681	NA	NA	NA	NA	NA	aaaaaatatccgacaaatgggcaactagtttatttaTTCACGGAAACAATCGATTGTctaa	[~]	9.52	[~]	9.703	[-]	10.498	[~]	11.088	[-]	12.139	[-]	11.673	[~]	13.057	[-]	12.574	[~]	13.56	[~]	13.062	[-]	8.985	[-]	9.211	[~]	12.209	[~]	13.064	[~]	13.351	[~]	13.223	[~]	13.111	[~]
THC0290_T_0564	1	818237	20	537	NA	0.460846	NA	0.935355	NA	NA	NA	NA	NA	agattatagtagaaaagactattcgctcggtgcttttttCGAATATACGTATGATAAtact	[+]	10.824	[+]	10.744	[+]	11.996	[+]	12.268	[+]	13.487	[+]	13.54	[+]	14.307	[+]	15.446	[+]	14.56	[+]	14.43	[+]	10.685	[+]	10.919	[+]	13.657	[~]	13.822	[~]	14.222	[~]	14.201	[+]	14.099	[+]
THC0290_T_0565	1	819193	12	186	NA	0.948017	NA	0.999667	-9;333;423	THC0290_0682;THC0290_N_0496;THC0290_0683	NA;NA;NA	Protein of unknown function;new transcription segment;Hypothetical protein	THC0290_v2_0729;NA;NA	aggtttcaataTCAatgtcaataacaattaaataAATAACAATGAAAAATATAATTTtaat	[~]	9.928	[~]	10.347	[~]	11.033	[~]	11.414	[~]	12.4	[~]	12.639	[~]	13.138	[~]	13.501	[~]	13.502	[~]	13.596	[~]	9.836	[+]	10.198	[~]	12.911	[~]	13.252	[~]	13.403	[~]	13.557	[~]	13.127	[~]
THC0290_T_0566	1	819616	94	98	SM1	0.839387	SigA	0.996335	0;291;355	THC0290_0683;THC0290_N_0497;THC0290_0684	NA;NA;sulP	Hypothetical protein;new transcription segment;Probable sulfate permease	NA;NA;THC0290_v2_0731	ATTaatgttaatatgtaaattatTTATTTTTAATTTTATAAATTCGCActatgaaattttt	[+]	11.539	[+]	11.493	[+]	11.951	[+]	12.011	[+]	12.71	[+]	12.951	[+]	13.273	[+]	13.762	[+]	13.406	[+]	13.438	[+]	11.512	[+]	11.637	[+]	13.576	[+]	13.45	[+]	13.418	[+]	13.724	[+]	13.013	[+]
THC0290_T_0567	1	821442	7	1313	SM1	0.923692	SigA	0.999334	153	THC0290_0685	cynT	Carbonic anhydrase	THC0290_v2_0732	TAATgcctcagatactgtgtataTTGCTCATGATGTATTAGATTTGATacaagaatttgaa	[~]	12.178	[~]	12.233	[~]	12.586	[~]	13.229	[~]	13.474	[~]	12.816	[~]	14.039	[~]	13.248	[~]	14.535	[~]	13.58	[~]	12.513	[~]	12.54	[~]	13.096	[~]	13.183	[~]	14.485	[~]	14.754	[~]	14.175	[~]
THC0290_T_0568	1	822316	40	6	SM1	0.968011	SigA	0.999667	0	THC0290_0686	NA	Transmembrane protein of unknown function, DedA family	THC0290_v2_0733	TAATtgtgctacattcgctttttTTAATAAAAAACATTTATATTTACTgcatgaataattt	[~]	11.153	[+]	11.12	[+]	11.006	[+]	11.329	[+]	11.394	[+]	11.071	[~]	11.624	[~]	12.867	[~]	12.115	[~]	11.977	[+]	11.124	[+]	10.983	[~]	11.693	[~]	11.411	[~]	12.28	[~]	12.535	[-]	11.998	[~]
THC0290_T_0569	-1	824622	20	965	SM1	0.998667	SigA	0.999	281	THC0290_0688	NA	Probable hydrolase (HAD superfamily)	THC0290_v2_0735	GTTTtagacaaaaataatagaatTCCGAAAGAAAATCATATATTTGATattcgccaaaaaa	[~]	10.594	[~]	10.711	[+]	10.774	[+]	10.908	[+]	10.925	[+]	11.038	[+]	10.581	[+]	10.915	[+]	11.134	[+]	11.436	[+]	10.933	[+]	11.082	[+]	12.662	[+]	12.584	[+]	11.19	[+]	11.191	[+]	13.046	[+]
THC0290_T_0570	-1	825341	9	333	SM1	0.952349	SigA	1	0	THC0290_0689	ribD	Riboflavin biosynthesis protein RibD	THC0290_v2_0736	TAAacccttaaactcttaaacttATAAACTAAAAGTTTTATTTTTGCGaagtgaagataca	[+]	9.653	[+]	9.668	[+]	9.083	[+]	9.028	[+]	8.897	[+]	8.89	[+]	8.829	[+]	7.779	[+]	9.899	[+]	9.535	[+]	9.219	[+]	9.141	[+]	9.104	[+]	9.632	[+]	9	[+]	8.946	[+]	10.003	[+]
THC0290_T_0571	-1	828032	6	987	SM6	0.366878	NA	-1	3	THC0290_0692	NA	Probable ABC-type transport system, permease component	THC0290_v2_0739	attttaaatagaaagttgtaacaaaatctgtaaTTTCGTGTCAAATAagtattatgctagg	[+]	9.783	[+]	9.755	[+]	9.535	[+]	9.881	[+]	9.791	[+]	10.124	[+]	9.677	[+]	10.166	[+]	10.666	[+]	10.406	[+]	9.143	[+]	9.293	[+]	11.546	[+]	11.55	[+]	10.74	[+]	10.549	[+]	12.955	[+]
THC0290_T_0572	1	828118	11	405	SM1	0.606798	SigA	0.95035	136;209	THC0290_N_0501;THC0290_0693	NA;hisS	new transcription segment;Histidine--tRNA ligase	NA;THC0290_v2_0740	CTTtctatttaaaattttataaaTAGGCTAAAAAACAAGATATTTGTAaaagttttaggag	[+]	8.897	[+]	8.99	[+]	9.402	[+]	8.976	[+]	9.359	[+]	9.901	[+]	10.201	[+]	9.486	[+]	10.813	[+]	10.844	[+]	9.294	[+]	9.205	[+]	11.41	[+]	11.134	[+]	10.922	[+]	10.395	[+]	11.441	[+]
THC0290_T_0573	1	828274	3	743	NA	0.654449	NA	0.999	-20;53	THC0290_N_0501;THC0290_0693	NA;hisS	new transcription segment;Histidine--tRNA ligase	NA;THC0290_v2_0740	gctaaaaagcaatttttaaaaccttctgcaatcgaataaccaaataatcgaataaccaaat	[+]	11.989	[+]	12.053	[+]	12.329	[+]	12.076	[+]	12.461	[+]	12.973	[+]	12.943	[+]	11.87	[+]	12.614	[+]	13.045	[+]	12.279	[+]	12.307	[+]	13.388	[+]	12.808	[+]	12.538	[+]	12.153	[+]	13.342	[+]
THC0290_T_0574	1	828290	3	744	NA	0.625458	NA	0.996668	-36;37	THC0290_N_0501;THC0290_0693	NA;hisS	new transcription segment;Histidine--tRNA ligase	NA;THC0290_v2_0740	taaaaccttctgcaatcgaataaccaaataatcgaataaccaaataatcgaataaccaaat	[+]	11.989	[+]	12.053	[+]	12.329	[+]	12.076	[+]	12.461	[+]	12.973	[+]	12.943	[+]	11.87	[+]	12.614	[+]	13.045	[+]	12.279	[+]	12.307	[+]	13.388	[+]	12.808	[+]	12.538	[+]	12.153	[+]	13.342	[+]
THC0290_T_0575	1	829767	3	56	SM5	0.664778	ND	0.664778	-21	THC0290_N_0503	NA	new transcription segment	NA	ttgacgaattgaaaTcattacttcaataaatcatTTTGTCATTTCGACgaaggagaaatct	[-]	7.38	[-]	7.249	[-]	7.341	[-]	7.489	[-]	7.864	[-]	7.706	[-]	7.736	[-]	8.546	[-]	6.987	[-]	7.526	[-]	7.401	[-]	7.162	[-]	6.825	[-]	6.693	[-]	6.696	[-]	7.167	[-]	4.996	[-]
THC0290_T_0576	-1	831464	963	1813	SM1	0.744752	SigA	0.994668	22	THC0290_0695	fspA	Flavobacterial-specific protein antigen FspA precursor	NA	TAGtgtttactttttatttttgaAACACTAATTAATACTACTTTCGACgaataatttttaa	[+]	14.379	[+]	14.636	[+]	14.823	[+]	14.801	[+]	14.289	[+]	14.207	[+]	12.613	[+]	13.05	[+]	12.266	[+]	12.01	[+]	14.49	[+]	14.645	[+]	9.766	[+]	8.452	[+]	10.399	[+]	11.038	[+]	8.746	[+]
THC0290_T_0577	1	831748	10	692	SM1	0.950017	SigA	0.999667	204	THC0290_0696	aroQ	3-dehydroquinate dehydratase	THC0290_v2_0743	TTCattttgctaatactttaataTATAACTGAAATAGTTACTTTTACAaaagtgttgtgcc	[+]	8.008	[+]	8.181	[+]	8.971	[+]	8.848	[+]	8.82	[+]	8.313	[+]	8.611	[+]	8.447	[+]	9.141	[+]	8.806	[+]	8.789	[+]	9.059	[+]	8.822	[+]	10.34	[+]	9.294	[+]	8.984	[+]	11.016	[+]
THC0290_T_0578	1	837130	4	1208	NA	0.729757	NA	0.989004	89	THC0290_N_0507	NA	new transcription segment	NA	ccttgtaacttttgcaaaattacaaggaattaatTATAAGATTTTAAAATACCATAAtccg	[~]	9.831	[~]	9.951	[~]	10.364	[~]	10.304	[~]	10.157	[~]	10.21	[~]	9.862	[~]	10.278	[~]	9.76	[~]	9.93	[~]	10.24	[~]	10.269	[~]	9.477	[~]	9.021	[~]	9.512	[~]	9.872	[~]	7.214	[~]
THC0290_T_0579	-1	839961	147	695	SM1	0.959347	SigA	1	16;303	THC0290_0702;THC0290_0701	NA;NA	Hypothetical protein;Protein of unknown function	NA;NA	TTCgcttcaaaaaatcctaatttATAATGCTAAAATTGTATATTTGCTtttcttttaagtt	[+]	11.616	[+]	11.463	[+]	11.161	[+]	11.132	[+]	11.071	[+]	11.748	[+]	11.439	[+]	10.347	[+]	12.172	[+]	13.024	[+]	11.141	[+]	11.182	[+]	12.54	[+]	11.973	[+]	11.631	[+]	11.785	[+]	12.447	[+]
THC0290_T_0580	-1	840245	3	205	SM4	0.998334	Sig54	0.998334	0;300	THC0290_N_0510;THC0290_0702	NA;NA	new transcription segment;Hypothetical protein	NA;NA	tgtacctgtctttttTTGGCATTACTTTTGCAGGTtaacacaaattttatagatgctattg	[+]	9.198	[+]	9.271	[+]	9.275	[+]	8.959	[+]	8.542	[+]	8.866	[+]	8.796	[+]	9.2	[+]	9.092	[+]	9.519	[+]	9.319	[+]	9.421	[+]	8.706	[+]	7.396	[+]	7.922	[+]	8.39	[+]	9.059	[+]
THC0290_T_0581	1	840377	64	1835	SM2	0.819727	SigA	1	15	THC0290_0703	NA	Protein of unknown function	THC0290_v2_0751	ccttaccggttggcTTTGctcgggtcgtaaTTTTTAATTATCTTTGCGCCTTATTttttaa	[+]	10.631	[+]	10.612	[+]	9.676	[+]	9.656	[+]	9.251	[+]	9.44	[+]	9.362	[+]	9.397	[+]	9.589	[+]	10.693	[+]	9.816	[+]	9.608	[+]	9.694	[+]	9.067	[+]	8.945	[+]	9.269	[~]	6.639	[+]
THC0290_T_0582	-1	840912	6	1297	SM1	0.657448	SigA	0.997334	NA	NA	NA	NA	NA	TTAgattttagagtttagactttAGATTTATTAAAATCTAAATTTGCTctaagataaaaag	[~]	4.768	[~]	3.931	[~]	4.841	[~]	4.585	[~]	4.621	[+]	5.25	[~]	4.911	[+]	7.476	[~]	4.755	[+]	5.552	[~]	4.582	[~]	4.653	[~]	3.95	[~]	4.005	[~]	4.447	[~]	4.041	[~]	4.63	[-]
THC0290_T_0583	1	844025	150	1741	SM1	0.544152	SigA	0.944352	39;315;354;431	THC0290_0706;THC0290_N_0514;THC0290_N_0515;THC0290_0707	hupB;NA;NA;NA	Histone-like bacterial DNA-binding protein HU-beta;new transcription segment;new transcription segment;Putative transcriptional regulator	THC0290_v2_0754;NA;NA;THC0290_v2_0755	AAatttgcttaactgttgtgagAATAGGAAATCCTATTAAATTTGTAtgtataagtataaa	[+]	14.559	[+]	14.774	[+]	15.106	[+]	15.303	[+]	14.92	[+]	14.658	[+]	14.105	[+]	14.201	[+]	13.499	[+]	13.299	[+]	15.07	[+]	15.399	[+]	13.298	[+]	13.662	[+]	13.147	[+]	13.569	[+]	13.205	[+]
THC0290_T_0584	1	844441	20	1094	SM1	0.911363	SigA	0.997334	15	THC0290_0707	NA	Putative transcriptional regulator	THC0290_v2_0755	TTTTTaacgattatatttggtttatACGTGTATTATTTGTTAAATTTAGAtaaaaatagaa	[+]	11.746	[+]	11.997	[+]	12.512	[+]	12.501	[+]	12.743	[+]	12.768	[+]	12.407	[+]	13.374	[+]	13.168	[+]	13.189	[+]	12.503	[+]	12.65	[+]	13.844	[+]	13.96	[+]	12.89	[+]	12.92	[+]	14.865	[+]
THC0290_T_0585	-1	845829	6	886	SM1	0.661446	SigA	1	22	THC0290_0708	NA	Branched-chain amino acid aminotransferase/4-amino-4-deoxychorismate lyase family protein	THC0290_v2_0756	GTTataggatctgtgtagtttctAAAAGATATTAAACTTATATTTGCActgaatttttcag	[~]	11.579	[~]	11.718	[~]	11.449	[~]	11.658	[~]	11.371	[~]	11.882	[~]	10.881	[~]	12.281	[~]	11.521	[~]	11.851	[~]	11.435	[~]	11.617	[~]	11.55	[~]	11.2	[~]	10.253	[~]	10.707	[~]	10.513	[+]
THC0290_T_0586	-1	846267	32	1520	SM1	0.818061	SigA	0.994668	13;460	THC0290_0709;THC0290_0708	NA;NA	Protein of unknown function;Branched-chain amino acid aminotransferase/4-amino-4-deoxychorismate lyase family protein	NA;THC0290_v2_0756	TTTTattaaaaaagatttttttatCAAACCATAATTATATACATTAGACccaaattataaa	[+]	11.842	[+]	12.014	[+]	12.31	[+]	12.3	[+]	12.072	[+]	12.912	[+]	11.204	[+]	12.634	[+]	11.825	[+]	12.673	[+]	12.454	[+]	12.366	[+]	13.235	[+]	12.214	[+]	11.233	[+]	11.091	[+]	12.402	[+]
THC0290_T_0587	1	846369	953	819	SM2	0.991003	SigA	1	29;106;133	THC0290_tRNA_0014;THC0290_N_0518;THC0290_N_0520	NA;NA;NA	transfer RNA-Met;new transcription segment;new transcription segment	NA;NA;NA	tttttatcaaaaatgTTTGtggtttttaaaTATAGTGTTATATTTGCACCCGCATtgagat	[+]	9.949	[+]	9.658	[+]	9.497	[+]	9.449	[+]	9.643	[+]	12.837	[+]	10.839	[+]	12.624	[+]	11.783	[+]	13.398	[+]	9.897	[+]	9.34	[+]	13.108	[+]	11.494	[+]	10.957	[+]	11.012	[+]	12.223	[+]
THC0290_T_0588	1	846370	4360	820	SM2	0.995002	SigA	1	28;105;132	THC0290_tRNA_0014;THC0290_N_0518;THC0290_N_0520	NA;NA;NA	transfer RNA-Met;new transcription segment;new transcription segment	NA;NA;NA	ttttatcaaaaatgTTTGtggtttttaaaTATAGTGTTATATTTGCACCCGCATtgagata	[+]	9.949	[+]	9.658	[+]	9.497	[+]	9.449	[+]	9.643	[+]	12.837	[+]	10.839	[+]	12.624	[+]	11.783	[+]	13.398	[+]	9.897	[+]	9.34	[+]	13.108	[+]	11.494	[+]	10.957	[+]	11.012	[+]	12.223	[+]
THC0290_T_0589	1	846398	5052	818	NA	0.422526	NA	0.965678	0;77;104	THC0290_tRNA_0014;THC0290_N_0518;THC0290_N_0520	NA;NA;NA	transfer RNA-Met;new transcription segment;new transcription segment	NA;NA;NA	atatagtgttatatttgcacccgcattgagatatgTAAAACTAAATAAatggcgagatagc	[+]	9.949	[+]	9.598	[+]	9.404	[+]	9.391	[+]	9.61	[+]	12.837	[+]	10.839	[+]	12.592	[+]	11.74	[+]	13.238	[+]	9.807	[+]	9.254	[+]	13.055	[+]	11.393	[+]	10.901	[+]	10.948	[+]	10.909	[+]
THC0290_T_0590	-1	848228	62	1761	SM2	0.702099	SigA	1	19	THC0290_0711	NA	Protein of unknown function	THC0290_v2_0760	ataacagtcaaacagCTTTtatttatgaatAAAAATTTTATTTTTGCAACTCATTaaatta	[+]	13.454	[+]	13.422	[+]	13.034	[+]	12.971	[+]	12.061	[+]	11.691	[+]	11.047	[+]	11.116	[+]	10.661	[+]	10.941	[+]	13.077	[+]	13.123	[+]	10.16	[+]	10.122	[+]	9.893	[+]	10.39	[+]	10.601	[+]
THC0290_T_0591	1	850049	3	616	NA	0.501833	NA	0.996335	246	THC0290_0714	NA	Protein of unknown function	THC0290_v2_0763	aggaatgtgcaatcaagaatttaatgagttattaAAATCGAACAAAAAAGTAATGGTTAat	[~]	11.203	[~]	11.214	[~]	12.052	[~]	12.236	[~]	12.548	[~]	12.337	[~]	12	[~]	12.011	[~]	11.419	[~]	11.515	[~]	11.887	[~]	12.054	[~]	11.532	[~]	11.623	[~]	11.541	[~]	11.364	[~]	11.442	[~]
THC0290_T_0592	-1	853265	3	1176	SM1	0.563479	SigA	0.997667	NA	NA	NA	NA	NA	ACTGgtactattaaagagtactaaATCTGAATTATTTGTTATTTTTGAAtatcgcaatagc	[~]	4.041	[~]	4.128	[~]	3.95	[~]	4.05	[~]	3.841	[~]	4.795	[~]	4.702	[-]	4.588	[~]	3.883	[+]	5.56	[~]	4.001	[~]	4.134	[+]	7.29	[+]	6.594	[~]	3.968	[~]	4.28	[~]	4.146	[+]
THC0290_T_0593	1	854020	22	125	SM1	0.979673	SigA	0.999667	1;58	THC0290_N_0523;THC0290_0717	NA;murB	new transcription segment;UDP-N-acetylmuramate dehydrogenase	NA;THC0290_v2_0766	TTagcccttatcagttatatttTTCAATTCTTTAAACTATTTTTGTTtttaataaaagtac	[~]	11.71	[~]	11.446	[~]	11.734	[~]	11.755	[~]	11.563	[-]	12.165	[~]	11.851	[-]	11.304	[~]	11.277	[~]	11.923	[~]	12.098	[~]	11.773	[~]	11.492	[+]	10.84	[+]	11.199	[+]	11.476	[+]	11.03	[+]
THC0290_T_0594	-1	856607	6	1322	SM1	0.789404	SigA	0.965012	241	THC0290_0719	NA	Probable rRNA methyltransferase	THC0290_v2_0768	ACCaaaccttgtaaagcttttatTGTAAATGAAATTCCTAACTTTGGCgagcgtggcaaga	[~]	8.716	[~]	8.787	[~]	8.018	[~]	7.782	[~]	7.665	[~]	7.306	[~]	7.452	[~]	7.818	[~]	7.743	[~]	7.265	[~]	8.141	[~]	8.299	[~]	6.675	[~]	6.96	[-]	7	[~]	7.395	[-]	6.678	[~]
THC0290_T_0595	-1	856972	3	1818	SM1	0.708097	SigA	0.999334	-21	THC0290_0720	NA	Pseudouridylate synthase	THC0290_v2_0769	ATCaatttattattttcaaaaatGATAAAATGAAAATGTATTTTTGCAaaatgacaattca	[+]	8.606	[+]	8.49	[+]	7.605	[+]	7.395	[+]	7.417	[+]	7.173	[+]	6.94	[+]	7.503	[+]	6.956	[+]	6.833	[+]	7.748	[+]	7.85	[+]	6.336	[+]	6.476	[+]	6.456	[+]	6.951	[~]	4.797	[+]
THC0290_T_0596	1	857044	4	478	SM1	0.965012	SigA	0.999667	14	THC0290_0721	rmuC	DNA recombination protein RmuC	THC0290_v2_0770	TTTatcatttttgaaaataataaATTGATTTTATTCCCTATTTTTACAtcttaaaatgtaa	[+]	9.316	[+]	9.367	[+]	9.38	[+]	9.29	[+]	9.298	[+]	9.611	[+]	9.179	[+]	9.036	[+]	9.444	[+]	10.226	[+]	9.294	[+]	9.332	[+]	10.261	[+]	10.292	[+]	9.725	[+]	9.491	[+]	10.96	[+]
THC0290_T_0597	-1	860293	3	927	SM2	0.967011	SigA	0.996001	0	THC0290_0724	irk	Inward rectifier potassium channel Irk	THC0290_v2_0773	cccttaattgggactTTTTttatgaataaaAAATACTCTAAATTTACCGTATGAAagtatt	[+]	8.363	[+]	8.413	[+]	8.486	[+]	8.421	[+]	8.636	[+]	9.021	[+]	9.273	[+]	8.769	[+]	10.171	[+]	10.637	[+]	8.412	[+]	8.449	[+]	11.175	[+]	10.218	[+]	9.046	[+]	8.61	[+]	10.533	[+]
THC0290_T_0598	-1	862320	4	642	NA	0.948017	NA	1	NA	NA	NA	NA	NA	cgcaggaggttgtaacgtgcaatttgccgtttcgCCCGATGATAAAGAAGATATTGTAGcg	[~]	10.74	[~]	10.789	[~]	10.071	[~]	10.022	[~]	9.661	[~]	9.503	[~]	10.852	[~]	8.451	[~]	10.756	[~]	10.38	[~]	10.109	[~]	9.607	[-]	8.9	[-]	9.228	[-]	9.512	[~]	9.687	[-]	8.633	[-]
THC0290_T_0599	-1	862647	3	1690	NA	0.998667	NA	1	NA	NA	NA	NA	NA	accttcattcaccttaGGAGGaacaggagctgccATTGTTTACAAAAAAGAAGATTTCGac	[~]	11.089	[~]	11.351	[+]	10.705	[~]	10.604	[~]	10.258	[~]	10.158	[~]	11.501	[+]	9.013	[~]	11.253	[~]	11.074	[~]	10.602	[+]	10.445	[~]	9.883	[~]	9.692	[~]	10.271	[~]	10.106	[~]	9.447	[~]
THC0290_T_0600	-1	863196	3	1711	NA	0.719427	NA	0.987671	-10	THC0290_0725	carB	Carbamoyl-phosphate synthase large subunit	THC0290_v2_0774	ctaaattgagcaactaataacacaactaactacaACTACGATGCCAAAAGACAATTCAAta	[~]	10.494	[~]	10.721	[~]	10.011	[~]	9.961	[~]	9.504	[~]	9.784	[~]	10.692	[~]	8.963	[~]	10.464	[~]	10.572	[~]	9.986	[~]	9.808	[~]	9.431	[~]	9.434	[~]	9.541	[~]	9.729	[~]	9.383	[~]
THC0290_T_0601	-1	863657	120	1592	SM2	0.996335	SigA	1	1;56;218;263;451	THC0290_N_0528;THC0290_0726;THC0290_N_0527;THC0290_N_0526;THC0290_0725	NA;rpmH;NA;NA;carB	new transcription segment;50S ribosomal protein L34;new transcription segment;new transcription segment;Carbamoyl-phosphate synthase large subunit	NA;THC0290_v2_0775;NA;NA;THC0290_v2_0774	atttttataaaaccaCTTGcaagaaaaaaaAATCATTGTATATTTGCACTCGGTTtgaaag	[+]	12.609	[+]	12.643	[+]	11.737	[+]	11.557	[+]	10.893	[+]	12.127	[+]	10.834	[+]	11.853	[+]	11.326	[+]	12.398	[+]	12.356	[+]	11.742	[+]	12.933	[+]	12.32	[+]	11.843	[+]	11.831	[+]	12.422	[+]
THC0290_T_0602	1	863736	12	1583	SM1	0.827724	SigA	0.999667	20	THC0290_0727	NA	Probable transmembrane protein of unknown function	NA	TTGcaagtggttttataaaaataTTTTAATTCTTTTACTATATTTGCCattcatttataaa	[+]	10.992	[+]	10.845	[+]	10.333	[+]	10.313	[+]	9.515	[+]	9.347	[+]	9.418	[+]	9.848	[+]	10.137	[+]	10.796	[+]	10.485	[+]	10.266	[+]	10.833	[+]	10.539	[+]	9.967	[+]	10.027	[+]	10.481	[+]
THC0290_T_0603	-1	867211	58	15	SM4	1	Sig54	1	30;306	THC0290_0729;THC0290_N_0530	groS;NA	10 kDa chaperonin GroES;new transcription segment	THC0290_v2_0780;NA	AAAaaatgtcagttttaaatccTTGGCATAATTTCTGAAAAGacaataacagcattaaaac	[+]	13.713	[+]	13.737	[+]	13.33	[+]	13.186	[+]	12.33	[+]	12.344	[+]	13.209	[+]	13.037	[+]	11.394	[+]	12.128	[+]	13.25	[+]	13.121	[+]	13.167	[+]	12.912	[+]	13.832	[+]	14.035	[+]	13.102	[+]
THC0290_T_0604	-1	867712	3	1823	NA	0.900367	NA	0.988004	17;392	THC0290_0730;THC0290_N_0531	secG;NA	Preprotein translocase SecG subunit;new transcription segment	THC0290_v2_0781;NA	aattactttctttgcagacagaatttcggatataAAAATGTTACAACAAAATAATAAtagt	[+]	13.139	[+]	13.245	[+]	13.027	[+]	12.945	[+]	12.598	[+]	12.736	[+]	11.973	[~]	12.369	[+]	11.939	[~]	12.025	[+]	12.891	[+]	12.942	[+]	12.46	[+]	12.532	[+]	12.447	[+]	12.484	[+]	12.306	[+]
THC0290_T_0605	-1	867728	5	1824	SM2	0.938021	SigA	0.988004	33;408	THC0290_0730;THC0290_N_0531	secG;NA	Preprotein translocase SecG subunit;new transcription segment	THC0290_v2_0781;NA	TGaaatatccagaaAAAATTACTTTCTTTGCAGACAGAAtttcggatataaaaatgttaca	[+]	13.139	[+]	13.245	[+]	13.027	[+]	12.945	[+]	12.598	[+]	12.736	[+]	11.973	[~]	12.369	[+]	11.939	[~]	12.025	[+]	12.891	[+]	12.942	[+]	12.46	[+]	12.532	[+]	12.447	[+]	12.484	[+]	12.306	[+]
THC0290_T_0606	-1	867743	59	1822	SM2	0.94102	SigA	0.997334	48;423	THC0290_0730;THC0290_N_0531	secG;NA	Preprotein translocase SecG subunit;new transcription segment	THC0290_v2_0781;NA	atgaaatattaatTTTGaaatatccagaaAAAATTACTTTCTTTGCAGACAGAAtttcgga	[+]	13.025	[+]	13.068	[+]	12.956	[+]	12.762	[+]	12.509	[+]	12.72	[+]	11.879	[~]	12.614	[+]	11.937	[~]	12.198	[+]	12.761	[+]	12.846	[+]	12.566	[+]	12.319	[+]	12.286	[+]	12.414	[+]	11.834	[+]
THC0290_T_0607	-1	870544	3	800	SM5	0.949017	ND	0.949017	1;69	THC0290_N_0534;THC0290_0733	NA;NA	new transcription segment;Probable sigma-54-dependent transcriptional regulator	NA;THC0290_v2_0784	ttatataaatactgcctaaaacaaattaggaataATAGTAAATTGCAAAAacaaatcttta	[~]	11.076	[~]	10.793	[~]	10.128	[~]	10.066	[+]	10.249	[+]	10.301	[~]	10.943	[~]	10.782	[+]	10.901	[+]	10.966	[~]	10.291	[~]	10.32	[+]	11.29	[~]	11.376	[+]	11.474	[~]	11.383	[~]	11.071	[+]
THC0290_T_0608	-1	872408	56	988	SM1	0.562479	SigA	0.953682	2	THC0290_0734	miaB	Probable TRNA-i(6)A37 modification enzyme MiaB	THC0290_v2_0785	acatcttgtcagaATTTTTCTTTTGCATTATCTTTGTAaaagaatttgacttatggaaaag	[+]	10.933	[+]	10.88	[+]	10.473	[+]	10.302	[+]	10.716	[+]	10.681	[+]	11.101	[+]	10.964	[+]	11.602	[+]	11.77	[+]	10.518	[+]	10.457	[+]	12.784	[+]	12.663	[+]	12.053	[+]	11.848	[+]	13.908	[+]
THC0290_T_0609	-1	872418	126	989	SM1	0.766744	SigA	1	12	THC0290_0734	miaB	Probable TRNA-i(6)A37 modification enzyme MiaB	THC0290_v2_0785	ATAacaactgacatcttgtcagaATTTTTCTTTTGCATTATCTTTGTAaaagaatttgact	[+]	10.955	[+]	11.023	[+]	10.467	[+]	10.423	[+]	10.745	[+]	10.744	[+]	11.09	[+]	10.936	[+]	11.758	[+]	12.286	[+]	10.634	[+]	10.552	[+]	13.23	[+]	12.818	[+]	12.058	[+]	11.882	[+]	13.797	[+]
THC0290_T_0610	1	875137	89	1836	SM1	0.822059	SigA	1	15	THC0290_0738	topA	DNA topoisomerase I	THC0290_v2_0790	TTTaaaatattgaaaggttaaaaTTTAAAAAAAAAATATACTTTTGCCaaatcaataaaat	[+]	11.151	[+]	11.146	[+]	10.376	[+]	10.309	[+]	9.672	[+]	9.646	[+]	9.632	[+]	8.523	[+]	10.076	[+]	10.065	[+]	10.443	[+]	10.411	[~]	9.748	[~]	9.705	[+]	9.715	[~]	9.765	[~]	9.595	[+]
THC0290_T_0611	1	876419	3	1691	NA	0.965012	NA	0.999667	NA	NA	NA	NA	NA	tgatgacgaagaagaaCAAGAaggaatgttgcctTCGATGAAAGTAAATGAAAAATTAAta	[~]	12.321	[~]	12.263	[~]	11.461	[~]	11.158	[~]	10.679	[+]	10.649	[~]	10.466	[+]	8.529	[~]	10.709	[+]	10.757	[~]	11.599	[~]	11.28	[+]	10.079	[+]	9.8	[~]	10.291	[~]	10.639	[~]	8.804	[+]
THC0290_T_0612	1	878409	6	769	SM1	0.983006	SigA	1	NA	NA	NA	NA	NA	TTGttgtcggtaaaatcttcagaTTCAGGTAATTTCACTACATTTGTAcccaacggttttt	[~]	11.298	[~]	11.119	[~]	10.422	[~]	10.512	[+]	10.665	[+]	11.606	[+]	11	[+]	12.028	[+]	11.627	[+]	13.116	[~]	10.651	[~]	10.348	[+]	12.786	[+]	11.569	[+]	11.501	[+]	11.567	[+]	11.582	[+]
THC0290_T_0613	1	878925	63	966	SM1	0.570477	SigA	0.984339	36	THC0290_0740	gldK	Gliding motility lipoprotein precursor GldK	THC0290_v2_0792	TTttaataaaaaaattgtttttTTGAAAATAAATAAATAGGTTTACGcccttaaaagatat	[+]	13.55	[+]	13.596	[+]	13.685	[+]	13.79	[+]	13.746	[+]	13.956	[+]	13.233	[+]	13.628	[+]	14.13	[+]	14.484	[+]	13.793	[+]	13.711	[+]	14.612	[+]	14.408	[+]	14.049	[+]	14.155	[+]	14.394	[+]
THC0290_T_0614	1	882660	52	7	SM6	0.995668	SigECF	0.995668	-26;23	THC0290_N_0540;THC0290_0743	NA;gldN	new transcription segment;Gliding motility protein precursor GldN	NA;NA	acttgtacatacgaagtACAATaatagtttaagaATTTCGTTTTAGTTCTAtaaactttac	[~]	14.557	[~]	14.662	[~]	14.824	[~]	14.944	[~]	15.058	[~]	15.049	[~]	14.539	[+]	15.423	[~]	15.236	[~]	14.765	[~]	14.94	[~]	14.99	[+]	15.208	[+]	15.359	[~]	15.221	[~]	15.361	[+]	15.085	[+]
THC0290_T_0615	1	882680	48	8	SM1	0.724425	SigA	0.965012	-46;3	THC0290_N_0540;THC0290_0743	NA;gldN	new transcription segment;Gliding motility protein precursor GldN	NA;NA	ATAatagtttaagaatttcgtttTAGTTCTATAAACTTTACAATTATAaaattatgaattg	[~]	14.702	[~]	14.67	[~]	14.987	[~]	14.968	[~]	15.085	[~]	15.056	[~]	14.571	[+]	15.444	[~]	15.289	[~]	14.797	[~]	14.992	[~]	15.002	[+]	15.238	[+]	15.382	[~]	15.27	[+]	15.499	[+]	15.165	[+]
THC0290_T_0616	1	882927	52	225	SM1	0.966011	SigA	0.983006	NA	NA	NA	NA	NA	AACatgggaaataatagatcttgATGAAAGAATTAACTTTCCTTTGTAttatcctatagat	[~]	14.85	[~]	14.865	[~]	15.346	[~]	15.45	[~]	15.444	[~]	14.881	[~]	15.115	[~]	15.423	[~]	15.462	[~]	14.714	[~]	15.245	[~]	15.759	[~]	15.11	[~]	15.626	[~]	15.752	[~]	15.978	[~]	15.361	[~]
THC0290_T_0617	1	883754	15	737	SM1	0.977008	SigA	0.999667	0	THC0290_0744	fjo30	Glycine/D-amino acid oxidases (deaminating) family protein Fjo30	THC0290_v2_0796	TTAattaaaaaactcttaccaaaTTGGTAAGAGTTTTTTACTTTTACAaaatgattgacta	[-]	9.127	[-]	9.147	[-]	8.683	[-]	8.699	[-]	8.583	[-]	8.628	[-]	8.496	[-]	9.465	[-]	8.428	[-]	8.663	[-]	8.854	[-]	8.841	[-]	8.622	[-]	8.903	[-]	8.077	[-]	8.082	[-]	7.955	[-]
THC0290_T_0618	1	884323	6	538	SM1	0.657448	SigA	0.996668	NA	NA	NA	NA	NA	GATtatatttcgtataaaaatatAAAAGCAAAAAACATTATTTTTGCCgaaggttttggtt	[~]	9.759	[~]	9.697	[~]	9.379	[~]	9.387	[~]	9.343	[~]	9.447	[~]	9.428	[-]	8.095	[~]	8.883	[~]	8.636	[~]	9.389	[~]	9.226	[~]	8.043	[-]	6.809	[-]	7.576	[~]	7.901	[-]	7.95	[-]
THC0290_T_0619	1	885342	7	1584	SM1	0.7001	SigA	0.938354	1;105	THC0290_N_0543;THC0290_0746	NA;NA	new transcription segment;Probably involved in regulation of translation initiation	NA;THC0290_v2_0799	AACTTCctgttaaaatgctatttaatTTCAATCCTTTTTTTAACATTTGCAaaaaaattag	[+]	9.126	[+]	8.916	[+]	7.946	[+]	7.761	[+]	7.251	[+]	6.942	[+]	7.03	[+]	5.251	[+]	7.848	[+]	8.148	[+]	7.997	[+]	8.116	[+]	8.11	[+]	8.445	[+]	7.976	[+]	7.517	[+]	8.928	[+]
THC0290_T_0620	-1	885369	15	1062	SM1	0.91936	SigA	0.999667	-7;422;436	THC0290_0745;THC0290_N_0542;THC0290_flavo-1_0038	NA;NA;NA	Protein of unknown function;new transcription segment;Flavo-1 RNA	NA;NA;NA	TTTaagattaaaactacttaaatTCGTGTTATAAATCCTAAATTTGCGttaccaaaatcat	[+]	10.19	[+]	10.024	[+]	10.035	[+]	10.261	[+]	10.892	[+]	11.607	[+]	11.258	[+]	12.665	[+]	12.583	[+]	13.096	[+]	10.02	[+]	9.991	[+]	12.488	[+]	12.056	[+]	10.868	[+]	11.013	[+]	12.895	[+]
THC0290_T_0621	-1	886457	4	413	SM1	0.62879	SigA	0.820726	NA	NA	NA	NA	NA	CTtcctcgttctactagtaaatTAATATCTTTTAAGATAACTTTGTCgccataagcttttg	[~]	5.454	[~]	5.169	[~]	4.809	[~]	4.463	[~]	3.928	[+]	6.187	[~]	5.395	[+]	8.36	[+]	6.502	[+]	7.447	[~]	4.945	[~]	4.364	[+]	7.01	[~]	4.892	[~]	4.409	[~]	4.684	[~]	4.913	[~]
THC0290_T_0622	-1	888915	7	566	SM1	0.710763	SigA	0.999	0;121	THC0290_N_0546;THC0290_0747	NA;NA	new transcription segment;Protein of unknown function	NA;NA	TTTgcatttagaagatttggcaaATCCGAAATAAAGCTTAATTTAGCTctaaactacttgt	[~]	8.183	[~]	8.037	[+]	8.466	[+]	8.432	[+]	8.452	[+]	9.461	[+]	7.988	[+]	8.542	[+]	9.228	[+]	9.634	[+]	8.685	[+]	8.742	[+]	10.892	[+]	10.144	[+]	8.897	[+]	8.522	[+]	10.097	[+]
THC0290_T_0623	1	889241	59	991	SM1	0.951683	SigA	0.998334	26	THC0290_0748	NA	Probable type II cytosine-specific modification methyltransferase	THC0290_v2_0801	TTcttttttattcgtttggataTTCCAATTTTTATTTTAAATTTGTAaccattgtataagg	[+]	10.82	[+]	10.781	[+]	10.471	[+]	10.592	[+]	10.48	[+]	10.825	[+]	10.513	[+]	10.229	[+]	11.59	[+]	12.317	[+]	10.683	[+]	10.693	[+]	13.882	[+]	13.393	[+]	11.864	[+]	11.706	[+]	14.09	[+]
THC0290_T_0624	-1	891267	13	1680	SM1	0.807064	SigA	0.997667	22	THC0290_0749	NA	Probable type II restriction enzyme	NA	AAacgaaatcgaataaaaaattTCAATAAAAAAGTATTAATTTAGCCgtcgaattataacg	[+]	9.406	[+]	9.379	[+]	9.163	[+]	9.037	[+]	9.1	[+]	8.789	[+]	8.796	[+]	9.366	[+]	8.899	[+]	8.847	[+]	9.063	[+]	9.205	[~]	7.768	[~]	7.57	[+]	7.681	[+]	8.12	[+]	7.537	[+]
THC0290_T_0625	-1	892113	44	1603	SM2	0.990337	SigA	1	1;63	THC0290_N_0550;THC0290_0750	NA;NA	new transcription segment;Probable DnaJ-class molecular chaperone	NA;THC0290_v2_0803	atcattgaagttaatTTTTaattaccatttTAAATAACTACTTTTGCACCCAATTtcaaac	[+]	12.302	[+]	12.253	[+]	10.533	[+]	10.418	[+]	9.966	[+]	10.206	[+]	10.165	[+]	10.834	[+]	11.221	[+]	11.967	[+]	10.696	[+]	10.589	[+]	11.726	[+]	11.698	[+]	11.399	[+]	11.619	[+]	11.233	[+]
THC0290_T_0626	1	893016	10	426	SM1	0.6008	SigA	0.999334	1;48	THC0290_N_0552;THC0290_0751	NA;era	new transcription segment;GTP-binding protein Era	NA;THC0290_v2_0805	AAGatctctttttgttgctactaTTCACTTCATATGACTACCTTTGTCctctagattttgg	[+]	11.019	[+]	10.942	[+]	10.278	[+]	10.116	[+]	10.24	[+]	10.753	[+]	10.75	[+]	11.273	[+]	11.822	[+]	12.699	[+]	10.314	[+]	10.329	[+]	12.842	[+]	12.564	[+]	11.976	[+]	11.844	[+]	13.212	[+]
THC0290_T_0627	1	893169	3	838	NA	0.669777	NA	0.905365	NA	NA	NA	NA	NA	ctacgttaatgaatgcctttgttggcgaacgattatcaattattacatcaaaagcacaaac	[~]	11.523	[~]	11.464	[+]	11.113	[~]	10.622	[+]	11.018	[+]	11.252	[+]	11.692	[+]	12.406	[+]	12.948	[+]	12.932	[+]	10.919	[+]	10.828	[+]	13.055	[+]	13.393	[+]	12.868	[+]	12.595	[+]	14.545	[+]
THC0290_T_0628	1	893431	3	38	NA	0.914362	NA	0.998667	NA	NA	NA	NA	NA	taaaattataaatgcaaaaataccagttttattaCTGTTAAATAAAATAGACACTTCAAat	[~]	11.322	[~]	11.531	[~]	10.547	[~]	10.561	[~]	10.562	[~]	10.79	[~]	10.987	[~]	11.377	[~]	11.558	[~]	11.9	[~]	10.613	[~]	10.624	[~]	11.967	[~]	11.748	[~]	11.627	[~]	11.505	[~]	11.854	[~]
THC0290_T_0629	1	894138	43	842	SM1	0.913029	SigA	1	16	THC0290_0752	engA	GTP-binding protein EngA	THC0290_v2_0806	GAATcttagttacttagcaagttAGTCACTTTTTTGACTACCTTTGTAaaatattaaaaat	[+]	12.173	[+]	12.148	[+]	11.596	[+]	11.725	[+]	11.926	[+]	12.128	[+]	12.131	[+]	11.845	[+]	12.752	[+]	13.37	[+]	11.737	[+]	11.635	[+]	13.846	[+]	13.382	[+]	12.684	[+]	12.662	[+]	14.313	[+]
THC0290_T_0630	1	895778	42	242	SM1	0.995002	SigA	1	17	THC0290_0753	NA	Protein of unknown function	NA	TATttttgtgtttgaagttttaTTCTCTATTAAAATCTATCTTTGATatcctaaaaataat	[+]	11.421	[+]	11.369	[+]	11.102	[+]	11.125	[+]	11.121	[+]	11.576	[+]	11.144	[+]	11.23	[+]	11.745	[+]	12.298	[+]	11.156	[+]	11.275	[+]	12.046	[+]	11.662	[+]	11.243	[+]	11.322	[+]	12.224	[+]
THC0290_T_0631	1	897042	13	788	NA	0.61113	NA	0.98134	NA	NA	NA	NA	NA	ccggaactgcaatatcagcctctggtgcggcaccAACTGGAATTATTCAAATTGGAGgtga	[~]	11.297	[~]	11.363	[~]	11.799	[~]	12.141	[~]	12.387	[~]	12.541	[~]	12.233	[~]	11.633	[~]	13.057	[~]	12.977	[~]	12.016	[~]	11.871	[~]	13.051	[~]	12.698	[~]	12.757	[~]	12.549	[~]	12.795	[+]
THC0290_T_0632	1	900416	6	926	SM1	0.956015	SigA	0.995002	1;458	THC0290_N_0556;THC0290_0756	NA;hutU	new transcription segment;Urocanate hydratase	NA;THC0290_v2_0811	ATAtttagaaacaattagaaacATACTTTAAAGTTTATAAATTTGTAatcatgaatttaca	[+]	10.311	[+]	10.46	[+]	10.611	[+]	10.386	[+]	10.474	[+]	11.199	[+]	10.97	[+]	9.967	[+]	11.404	[+]	11.89	[+]	10.547	[+]	10.536	[+]	11.63	[+]	11.331	[+]	11.004	[+]	11.1	[+]	12.767	[+]
THC0290_T_0633	1	902827	3	595	NA	0.698101	NA	0.999	30;199	THC0290_N_0557;THC0290_0757	NA;NA	new transcription segment;Protein of unknown function	NA;THC0290_v2_0812	tccaaagagccatggccgcacaaccgctactaaaAATTACAATCCCCAACATAGTCGaaga	[-]	10.507	[-]	10.377	[-]	10.872	[-]	10.782	[-]	11.221	[-]	12.344	[-]	11.909	[-]	9.821	[-]	11.922	[-]	12.223	[-]	11.078	[-]	10.653	[-]	11.196	[-]	9.818	[-]	10.705	[-]	10.648	[-]	10.173	[-]
THC0290_T_0634	1	904793	100	1246	SM1	0.990003	SigA	1	20	THC0290_0759	phhA	Phenylalanine 4-monooxygenase	THC0290_v2_0814	TTTtatacaataaactaaaaaaaACATTATTTAATCCCTAAATTTACTtccaaacaataat	[+]	11.7	[+]	11.623	[~]	12.085	[~]	11.911	[~]	12.095	[+]	12.152	[+]	12.22	[~]	10.017	[+]	11.81	[+]	11.845	[+]	12.414	[+]	12.306	[+]	12.021	[+]	11.982	[+]	11.545	[+]	11.716	[+]	12.462	[+]
THC0290_T_0635	1	906489	4	1364	SM1	0.442852	NA	0.504499	79	THC0290_N_0559	NA	new transcription segment	NA	caggctaaagataccgttcttagctcaaaaataaTTTCACATTTAGAaagtttgaagaact	[~]	10.087	[~]	10.083	[~]	10.745	[~]	10.846	[~]	11.336	[~]	11.464	[~]	11.629	[~]	13.334	[~]	11.715	[~]	11.334	[~]	10.762	[~]	10.737	[~]	11.081	[~]	11.028	[~]	11.08	[~]	11.23	[~]	10.442	[~]
THC0290_T_0636	-1	907217	5	1498	SM2	0.444518	SigA	0.549817	26	THC0290_0760	NA	Protein of unknown function	NA	accaacaatttttaTcgaaacttcgagatAAAATTACTAAACTTGTAGTCATAtatccatt	[+]	9.465	[+]	9.702	[+]	9.551	[+]	9.488	[+]	9.157	[+]	9.282	[~]	8.566	[+]	9.532	[+]	9.038	[+]	9.424	[+]	9.536	[+]	9.506	[+]	10.086	[+]	9.909	[+]	8.287	[+]	8.439	[+]	9.868	[+]
THC0290_T_0637	1	907244	4	696	SM1	0.949017	SigA	1	1	THC0290_N_0560	NA	new transcription segment	NA	TTAaaatttcatgaatggatataTGACTACAAGTTTAGTAATTTTATCtcgaagtttcgat	[~]	6.292	[~]	6.207	[~]	6.143	[~]	5.455	[~]	5.232	[~]	5.308	[~]	4.576	[~]	5.999	[-]	4.636	[~]	5.588	[~]	6.17	[~]	6.108	[~]	5.465	[~]	5.462	[~]	5.161	[~]	5.349	[-]	4.116	[-]
THC0290_T_0638	-1	909009	10	1534	SM3	0.540153	SigA	0.999	1;193	THC0290_N_0562;THC0290_0762	NA;NA	new transcription segment;Protein of unknown function	NA;THC0290_v2_0817	tcaatcacaaaatctaTTGcttttcttattGTTATTTTATATTTTTGTgcaacttaatttt	[+]	13.139	[+]	13.043	[+]	13.184	[+]	13.018	[+]	12.859	[+]	13.724	[+]	12.734	[+]	13.268	[+]	12.674	[+]	13.336	[+]	13.065	[+]	12.88	[+]	12.772	[+]	13.588	[+]	12.552	[+]	12.316	[+]	13.16	[+]
THC0290_T_0639	-1	913209	10	1276	SM1	0.996668	SigA	0.999334	143;361	THC0290_0765;THC0290_0764	NA;NA	Protein of unknown function;Protein of unknown function	NA;THC0290_v2_0819	ATAtctgtaaaacatcaaaataCTAGTTCAGATTATATATTTTTGCAagtaattgaaaatg	[+]	12.251	[~]	12.104	[~]	11.962	[~]	12.01	[~]	11.852	[+]	11.945	[~]	11.358	[+]	12.224	[+]	9.925	[+]	10.899	[+]	11.797	[~]	11.846	[+]	10.355	[+]	9.924	[~]	10.177	[+]	10.659	[+]	10.367	[+]
THC0290_T_0640	1	913998	4	1031	SM1	0.79007	SigA	0.795068	0	THC0290_N_0564	NA	new transcription segment	NA	AATttacctttttgattaatattATAAGATAAAATTCCTATTTTGTCTacaatgtaattga	[~]	4.975	[+]	5.435	[~]	5.144	[+]	5.913	[+]	6.066	[~]	6.722	[+]	6.311	[-]	8.455	[+]	7.735	[+]	8.521	[+]	5.671	[+]	5.552	[+]	9.798	[+]	8.517	[+]	7.315	[+]	6.936	[+]	7.873	[+]
THC0290_T_0641	-1	915591	4	1635	NA	0.76008	NA	0.983006	5;442	THC0290_0768;THC0290_0767	NA;NA	Protein of unknown function;Protein of unknown function precursor	THC0290_v2_0822;THC0290_v2_0821	caatagcgtacttaggGAAAgcttagagaactttGTGGTTAAAAAAACATACCAAATGTcg	[~]	12.751	[~]	12.724	[~]	12.809	[~]	13.032	[~]	13.208	[+]	13.192	[~]	12.988	[~]	12.4	[~]	11.889	[~]	11.516	[~]	12.518	[~]	12.651	[~]	11.195	[~]	11.033	[~]	11.623	[~]	11.746	[~]	11.347	[~]
THC0290_T_0642	-1	915648	5	1469	NA	0.448184	NA	0.991669	-16;62;499	THC0290_N_0566;THC0290_0768;THC0290_0767	NA;NA;NA	new transcription segment;Protein of unknown function;Protein of unknown function precursor	NA;THC0290_v2_0822;THC0290_v2_0821	tggtgctgaaaaacctgttgaagtaaaattctaaaaAATAATTAACCACAAAGTTCgcaat	[~]	12.606	[~]	12.68	[-]	12.798	[-]	13.03	[-]	13.166	[-]	13.135	[~]	12.984	[-]	12.311	[-]	11.764	[-]	11.396	[~]	12.49	[~]	12.637	[-]	11.171	[-]	10.949	[-]	11.615	[-]	11.715	[-]	11.324	[-]
THC0290_T_0643	-1	916272	12	1242	NA	0.398534	NA	0.934022	-28;20	THC0290_N_0567;THC0290_0769	NA;NA	new transcription segment;LemA family protein	NA;THC0290_v2_0823	aaatattaaaaacgaattgtaacgaattaaaaaaTAATTGACTAATAAATAACTTttaaat	[+]	11.912	[+]	12.122	[+]	12.25	[+]	12.487	[+]	12.765	[+]	12.891	[+]	12.307	[+]	12.006	[+]	11.764	[+]	11.531	[+]	11.875	[+]	12.038	[~]	11.303	[+]	11.077	[+]	11.682	[+]	11.758	[+]	11.269	[+]
THC0290_T_0644	1	917637	28	809	SM2	0.892702	SigA	1	1;304	THC0290_N_0568;THC0290_0772	NA;alaS	new transcription segment;Alanine--tRNA ligase	NA;THC0290_v2_0826	gtaatagtattttacTTTCttcatattttaAAATATCCTATTTTTGTAGTCGTTAtcacaa	[+]	11.136	[+]	10.997	[+]	11.454	[+]	11.436	[+]	11.993	[+]	12.753	[+]	12.443	[+]	12.234	[+]	12.472	[+]	13.117	[+]	11.467	[+]	11.415	[+]	12.421	[+]	11.753	[+]	11.967	[+]	12.015	[+]	12.604	[+]
THC0290_T_0645	-1	917640	15	1086	SM1	0.978341	SigA	0.998334	30	THC0290_0771	NA	Transmembrane peptidase, M23B family	THC0290_v2_0825	ATTgaaacattttctacattagtTCGTCTAATATTTTGTTACTTTGTGataacgactacaa	[+]	9.66	[+]	9.74	[+]	9.955	[+]	10.016	[+]	10.099	[+]	10.743	[+]	10.08	[+]	10.303	[+]	10.874	[+]	11.456	[+]	9.668	[+]	9.817	[+]	12.061	[+]	11.493	[+]	10.808	[+]	10.817	[+]	11.845	[+]
THC0290_T_0646	-1	917653	10	1087	SM1	0.784072	SigA	0.854382	43	THC0290_0771	NA	Transmembrane peptidase, M23B family	THC0290_v2_0825	aagatgtttaatAATTGAAACATTTTCTACATTAGTTcgtctaatattttgttactttgtg	[+]	9.657	[+]	9.727	[+]	9.951	[+]	9.963	[+]	10.092	[+]	10.712	[+]	10.05	[+]	10.236	[+]	10.873	[+]	11.444	[+]	9.651	[+]	9.798	[+]	11.952	[+]	11.473	[+]	10.785	[+]	10.816	[+]	11.819	[+]
THC0290_T_0647	1	917781	8	1238	NA	0.742752	NA	0.997001	160	THC0290_0772	alaS	Alanine--tRNA ligase	THC0290_v2_0826	ttcgttgcaagttctcgtttagaaagctttttttcTACGAGCCAGCAGGAGCTTCCTTTGg	[~]	10.19	[~]	10.169	[~]	10.462	[-]	9.899	[-]	10.316	[-]	10.708	[~]	11.343	[-]	9.976	[-]	11.223	[-]	11.114	[-]	9.858	[~]	10.33	[-]	10.666	[-]	10.595	[~]	10.96	[~]	10.954	[-]	11.071	[-]
THC0290_T_0648	1	918781	6	107	NA	0.990337	NA	1	NA	NA	NA	NA	NA	aagtaacacaaattacaggatataaatatacttcAAACGAAGTTAAAAACATAAGCGaaga	[~]	11.816	[~]	11.797	[~]	11.673	[~]	11.794	[~]	12.091	[~]	11.768	[~]	12.546	[+]	11.661	[~]	12.302	[~]	11.973	[~]	11.767	[~]	11.828	[~]	11.234	[~]	10.982	[~]	11.845	[~]	11.822	[~]	11.019	[~]
THC0290_T_0649	1	920563	4	228	NA	0.930357	NA	0.999667	42	THC0290_N_0569	NA	new transcription segment	NA	gtggtggacaaCcattttttgcctcaggaaaaggGAAAAATGTAAGCGGTATTAAAGaagc	[-]	10.388	[-]	10.53	[-]	10.429	[-]	10.512	[-]	10.997	[-]	11.435	[-]	11.538	[~]	13.606	[~]	12.106	[~]	12.008	[-]	10.544	[-]	10.372	[~]	11.02	[~]	10.869	[~]	11.384	[~]	11.478	[~]	11.086	[~]
THC0290_T_0650	-1	924991	3	1152	NA	0.749417	NA	0.880706	NA	NA	NA	NA	NA	ttcgggaaaatcatcattagtagatgaattagtgcgccgttttttaatagattttccaaca	[+]	11.528	[+]	11.559	[+]	11.471	[+]	12.103	[+]	12.283	[+]	12.159	[+]	12.402	[+]	10.164	[+]	13.192	[+]	12.587	[+]	11.581	[+]	11.69	[+]	12.311	[+]	14.042	[+]	13.092	[+]	12.485	[+]	15.352	[+]
THC0290_T_0651	-1	925680	7	535	SM2	0.679773	SigA	0.993336	22	THC0290_0774	NA	Methylmalonyl-CoA mutase	THC0290_v2_0828	ttccattaaaaaaaaTAGgtaatttttataAAAATCTCTAGATTTGCTACTCAAAaatacc	[+]	8.739	[+]	8.868	[+]	9.614	[+]	9.738	[+]	10.444	[+]	10.117	[+]	10.572	[+]	9.095	[+]	11.053	[+]	10.601	[+]	9.256	[+]	9.35	[+]	9.823	[+]	9.916	[+]	10.301	[+]	10.311	[+]	11.06	[+]
THC0290_T_0652	1	925991	23	1107	SM1	0.993669	SigA	0.999667	15;254	THC0290_0775;THC0290_0776	NA;NA	Hypothetical protein;Putative plasmid stabilization system protein	NA;THC0290_v2_0830	AAAAAattctgataacgaatgacatCTTTAAGATAATTTGTATTTTTGATgaaaatatttt	[+]	9.017	[+]	9.206	[+]	9.306	[+]	9.515	[+]	10.125	[+]	10.74	[+]	10.044	[+]	11.195	[+]	10.908	[+]	11.386	[+]	9.26	[+]	9.33	[+]	11.727	[+]	12.161	[+]	10.287	[+]	10.411	[+]	12.846	[+]
THC0290_T_0653	1	926006	4	1108	SM1	0.973009	SigA	0.994668	0;239	THC0290_0775;THC0290_0776	NA;NA	Hypothetical protein;Putative plasmid stabilization system protein	NA;THC0290_v2_0830	cgaatgacatCTTTAAGATAATTTGTATTTTTGATgaaaatatttttgttatggatattca	[+]	9.017	[+]	9.206	[+]	9.306	[+]	9.515	[+]	10.064	[+]	10.72	[+]	10.031	[+]	11.195	[+]	10.908	[+]	11.098	[+]	9.26	[+]	9.33	[+]	11.627	[+]	12.161	[+]	10.287	[+]	10.411	[+]	12.846	[+]
THC0290_T_0654	1	926675	17	804	SM1	0.955348	SigA	0.999667	295	THC0290_0777	NA	Protein of unknown function precursor	NA	TTATatttgggatgatttggcaaaTCCGAATAATAGGCTTAATTTAGTCccaaacccgatg	[~]	9.439	[~]	9.593	[~]	9.597	[~]	9.722	[~]	10.28	[~]	10.555	[~]	10.531	[~]	11.242	[~]	10.8	[~]	10.981	[~]	9.88	[~]	9.75	[+]	11.746	[~]	11.399	[~]	11.012	[~]	10.963	[~]	11.065	[+]
THC0290_T_0655	1	926947	13	206	SM4	0.92036	Sig54	0.92036	23	THC0290_0777	NA	Protein of unknown function precursor	NA	AATatttacatttaatatataaATGGCTTTATTTTTGATACTattgcatcataaaaattaa	[+]	9.805	[+]	10.083	[+]	10.075	[+]	10.195	[+]	9.884	[+]	10.106	[+]	9.722	[+]	10.616	[+]	9.883	[+]	10	[+]	10.151	[+]	10.385	[+]	10.515	[~]	10.528	[~]	10.253	[+]	10.363	[+]	10.473	[+]
THC0290_T_0656	1	927786	920	308	SM1	0.98034	SigA	0.999	1	THC0290_N_0573	NA	new transcription segment	NA	ATAacattgctttaacgttaaatTATAAAAACAATCGCTTTCTTTGTAtagaaattcatag	[-]	6.248	[-]	6.352	[-]	6.196	[-]	6.257	[-]	6.445	[-]	6.442	[-]	6.209	[-]	8.265	[-]	6.97	[-]	8.52	[-]	6.116	[-]	6.263	[~]	9.814	[~]	8.853	[-]	7.658	[-]	6.818	[~]	9.82	[~]
THC0290_T_0657	-1	928514	4	1506	SM1	0.616794	SigA	0.998667	0;225	THC0290_N_0574;THC0290_0778	NA;NA	new transcription segment;Protein of unknown function	NA;NA	TTTgcatgtgcaatagccgctggTAGCGATTCTTTTGCTATTTTTGGCacatattttaaaa	[+]	8.61	[+]	8.663	[+]	8.36	[+]	8.321	[+]	7.862	[+]	7.891	[+]	7.616	[+]	7.115	[+]	8.195	[+]	8.505	[+]	8.293	[+]	8.334	[+]	7.309	[+]	8.024	[+]	7.196	[+]	8.018	[+]	7.819	[+]
THC0290_T_0658	1	929153	12	815	SM3	0.697434	SigA	1	19	THC0290_0780	NA	Probable acyltransferase	THC0290_v2_0834	gaaattctaaaaaaaGTCttataacttaaTAGTTTTTGTAAATTTGTagttcacatttttt	[+]	10.771	[+]	10.793	[+]	10.579	[+]	10.514	[+]	10.759	[+]	11.461	[+]	10.977	[+]	10.875	[+]	10.709	[+]	11.964	[+]	10.763	[+]	10.714	[+]	12.489	[+]	11.331	[+]	11.235	[+]	11.166	[+]	11.511	[+]
THC0290_T_0659	-1	930629	4	431	SM5	0.427524	ND	-1	28	THC0290_0781	NA	Probable transmembrane protein of unknown function, putative anti ECF-type sigma factor	NA	aggtgaatgctagggtgaaaatgaatagaattaAGAGTAAATTGAAGAAAattattaatcc	[-]	9.03	[-]	9.139	[~]	8.694	[~]	8.763	[~]	8.157	[~]	8.699	[~]	7.916	[~]	8.83	[-]	8.574	[~]	9.04	[~]	8.089	[~]	8.288	[~]	9.613	[-]	9.686	[-]	8.688	[~]	8.949	[-]	10.077	[~]
THC0290_T_0660	-1	931109	15	780	NA	0.653116	NA	0.787071	0	THC0290_0782	NA	RNA polymerase ECF-type sigma factor	THC0290_v2_0836	tttattgttttactttgtaacaaacttactattaATACTACTAACGTGATATGAGTaatgc	[+]	9.216	[+]	9.579	[+]	9.12	[+]	8.943	[+]	8.64	[+]	8.961	[+]	8.015	[+]	9.012	[~]	8.817	[+]	9.093	[+]	8.296	[+]	8.502	[+]	9.351	[~]	9.553	[~]	8.667	[+]	8.84	[-]	10.041	[+]
THC0290_T_0661	-1	931139	6	781	SM1	0.668111	SigA	0.979673	30	THC0290_0782	NA	RNA polymerase ECF-type sigma factor	THC0290_v2_0836	AAAAaaacgggaatgttgtgcttcTAATTTTTTATTGTTTTACTTTGTAacaaacttacta	[+]	9.69	[+]	9.998	[+]	9.461	[+]	9.69	[+]	9.436	[+]	9.362	[+]	9.02	[+]	9.033	[+]	10.192	[+]	10.187	[+]	8.952	[+]	9.135	[+]	10.629	[~]	11.149	[+]	10.206	[+]	9.896	[~]	11.912	[+]
THC0290_T_0662	1	931304	7	1545	SM2	0.992336	SigA	0.997667	20	THC0290_0783	ndh	NADH dehydrogenase	THC0290_v2_0837	ggctaaaaattagcATTCaaattctaaaaAACCTTTGTACCTTAGCCCCTAAGAaacccag	[+]	11.096	[+]	11.102	[+]	11.546	[+]	11.329	[+]	11.064	[+]	11.467	[+]	11	[+]	7.115	[+]	10.927	[+]	10.958	[+]	11.521	[+]	11.14	[+]	11.997	[+]	11.915	[+]	11.199	[+]	10.319	[+]	13.183	[+]
THC0290_T_0663	-1	933694	3	184	SM3	0.60913	SigA	0.998334	14	THC0290_0784	NA	Probable transmembrane protein of unknown function	NA	ttacaaagtttattTTctttgtaaattgATTTGTGATTATATTTACgttcttaaaaacatt	[+]	7.783	[+]	7.5	[+]	7.79	[+]	7.67	[+]	7.62	[+]	7.57	[+]	7.388	[+]	7.865	[+]	7.759	[+]	7.516	[+]	7.526	[+]	7.55	[~]	7.472	[+]	6.046	[+]	6.631	[+]	6.841	[+]	7.166	[~]
THC0290_T_0664	1	933755	423	785	SM2	0.710097	SigA	0.999	24	THC0290_0785	pepD	Xaa-His dipeptidase	THC0290_v2_0839	ataatcacaaatcaATTTacaaagaaaatAAACTTTGTAACTTTGTACACTTGAaactttg	[+]	12.504	[+]	12.416	[+]	12.516	[+]	12.625	[+]	12.79	[+]	12.657	[+]	12.975	[+]	12.449	[+]	13.303	[+]	13.173	[+]	12.411	[+]	12.428	[+]	12.782	[+]	12.733	[+]	12.891	[+]	12.716	[+]	13.467	[+]
THC0290_T_0665	-1	936976	126	1718	SM1	0.997001	SigA	1	39	THC0290_0786	NA	Acyl-CoA dehydrogenase family protein	THC0290_v2_0840	AAATTaggaaaaccttttgagaaaTTCATATTAATCGAGTATATTTGAAaagttttttaaa	[+]	12.323	[+]	12.305	[+]	12.469	[+]	12.516	[+]	12.207	[+]	12.251	[+]	11.681	[+]	11.265	[+]	11.847	[+]	11.808	[+]	12.571	[+]	12.661	[+]	11.997	[~]	11.818	[+]	11.73	[+]	11.882	[~]	11.074	[+]
THC0290_T_0666	1	937033	116	957	SM1	0.862379	SigA	0.995668	0	THC0290_0787	NA	Protein of unknown function	THC0290_v2_0841	ATAtactcgattaatatgaatttCTCAAAAGGTTTTCCTAATTTTAACccatgattaagca	[+]	10.305	[+]	10.471	[+]	10.602	[+]	10.598	[+]	10.877	[+]	11.103	[+]	10.679	[+]	9.613	[+]	10.873	[+]	10.956	[+]	10.557	[+]	10.745	[+]	11.148	[+]	11.058	[+]	10.426	[+]	10.207	[+]	11.938	[+]
THC0290_T_0667	1	938896	19	110	SM1	0.994002	SigA	1	31	THC0290_0789	NA	Glu/Leu/Phe/Val dehydrogenase family protein	THC0290_v2_0843	AAAattataaacacacaattttcTTGATTCTATTTTTTTATATTTGCGaaacaaaaaaata	[~]	11.349	[~]	11.152	[~]	10.881	[~]	11.061	[-]	10.539	[-]	10.318	[-]	10.298	[-]	7.794	[-]	10.345	[-]	10.583	[~]	11.231	[~]	11.185	[-]	10.391	[-]	10.701	[-]	9.865	[-]	9.995	[-]	10.612	[-]
THC0290_T_0668	1	940173	5	1204	SM4	0.997001	Sig54	0.997001	1;65	THC0290_N_0579;THC0290_0790	NA;NA	new transcription segment;Hypothetical protein	NA;NA	TTTtgaaatcgctttgaaacaaTTGGTATAGTTCTTGAAAGTtaagtcataaagccgaaag	[~]	13.48	[~]	13.392	[~]	13.304	[~]	13.167	[~]	12.93	[~]	12.362	[~]	12.286	[~]	11.386	[~]	11.779	[~]	11.922	[~]	13.381	[~]	13.354	[~]	11.243	[~]	11.538	[~]	11.623	[~]	11.771	[+]	11.511	[+]
THC0290_T_0670	1	941248	39	1167	SM6	0.983672	SigECF	0.983672	36	THC0290_0791	NA	Protein of unknown function	NA	ctaaagataattagtgaATAATatcaatacatttTTAGCGTTAGGATTTTAagactttaga	[~]	10.878	[~]	10.865	[~]	10.713	[~]	10.57	[~]	10.369	[-]	9.997	[~]	10.083	[-]	8.964	[~]	10.254	[~]	10.255	[~]	10.943	[-]	10.93	[~]	10.916	[~]	10.948	[~]	10.692	[~]	10.78	[~]	10.738	[~]
THC0290_T_0671	-1	944163	4	656	NA	0.640786	NA	0.962346	44	THC0290_0793	NA	Probable transmembrane protein of unknown function	THC0290_v2_0847	atgaattaaactatactgttcacgaaaattataGTGTAAATCCAATAGCACCACGCcaagt	[~]	10.181	[-]	10.299	[-]	11.89	[~]	11.862	[~]	12.987	[~]	13.021	[~]	13.274	[~]	13.667	[~]	13.195	[~]	13.219	[~]	12.701	[~]	12.657	[~]	11.832	[~]	11.514	[~]	12.26	[~]	12.627	[~]	10.55	[~]
THC0290_T_0672	-1	946404	81	118	SM2	0.63079	SigA	1	24	THC0290_0794	fhuA	Probable TonB-dependent outer membrane ferrichrome-iron receptor precursor FhuA	THC0290_v2_0848	ttagtctaaataatcTTTGaaaagtaaaatCTAGGCTTTACTTTTGCATTATTATtttaac	[+]	11.088	[+]	11.241	[+]	13.018	[+]	12.895	[+]	13.717	[+]	13.948	[+]	13.869	[+]	13.252	[+]	14.033	[+]	14.417	[+]	13.65	[+]	13.803	[+]	13.432	[+]	12.951	[+]	13.095	[+]	13.294	[+]	13.399	[+]
THC0290_T_0673	1	947101	40	1575	SM3	0.673442	SigA	1	21	THC0290_0795	prfA	Peptide chain release factor 1 (RF-1)	THC0290_v2_0849	atctaaaatttaaaaTTTacaatctgcaatCTTTTTTGTAATTTTGCactccaaatatcaa	[+]	12.421	[+]	12.354	[+]	11.593	[+]	11.506	[+]	11.045	[+]	11.133	[+]	11.613	[+]	11.524	[+]	12.436	[+]	13.059	[+]	11.784	[+]	11.623	[+]	12.84	[+]	12.679	[+]	12.337	[+]	12.434	[+]	13.018	[+]
THC0290_T_0674	1	948211	7	302	NA	0.824059	NA	0.998667	-15;115	THC0290_N_0583;THC0290_0796	NA;NA	new transcription segment;Probable outer membrane protein precursor, OmpA family	NA;THC0290_v2_0850	atatggagaaattgaaagagtcagagattttttaAAAAATTATCAATAAAAAAAAGGttcg	[~]	12.438	[~]	12.263	[~]	11.319	[~]	11.239	[~]	10.615	[~]	10.655	[~]	11.294	[~]	11.845	[~]	11.916	[~]	12.947	[~]	11.502	[~]	11.209	[~]	12.322	[~]	12.153	[~]	12.033	[~]	12.073	[~]	11.412	[~]
THC0290_T_0675	-1	952261	8	1842	SM2	0.928024	SigA	1	17	THC0290_0797	pepT	Tripeptide aminopeptidase	THC0290_v2_0851	taccaaacaaaagaaTTTCtcttttcctaaATAAATCTTATATTTGACCCTCATTaaaaaa	[+]	12.088	[+]	12.125	[+]	11.755	[+]	11.5	[+]	10.886	[+]	11.258	[+]	10.606	[+]	10.14	[+]	10.566	[+]	10.975	[+]	11.843	[+]	11.652	[+]	11.217	[+]	10.64	[+]	10.465	[+]	10.471	[+]	11.239	[+]
THC0290_T_0676	-1	959128	8	427	NA	0.993669	NA	1	-9	THC0290_0804	NA	3-hydroxyacyl-CoA dehydrogenase family protein	THC0290_v2_0858	tgcatggaaaaGTAAtctttttaatttttaaataTTAAATAATGAAAAATATAGCAGtaat	[~]	12.066	[~]	12.121	[~]	12.124	[~]	12.177	[~]	12.107	[~]	11.806	[~]	12.13	[~]	10.471	[~]	11.689	[~]	11.299	[~]	12.298	[~]	12.266	[~]	10.474	[~]	10.176	[~]	11.161	[~]	11.19	[~]	10.529	[~]
THC0290_T_0677	-1	959828	6	79	NA	0.986671	NA	0.999	NA	NA	NA	NA	NA	caaacatgtatttattGAAAAacccatttctaccACTGTCGAAGAAGCTGAAGAAATTAtt	[~]	11.252	[~]	11.426	[~]	11.494	[~]	11.357	[~]	11.629	[+]	11.529	[~]	11.636	[+]	11.35	[~]	11.529	[~]	11.17	[~]	11.371	[~]	11.651	[~]	10.589	[~]	10.498	[~]	10.644	[~]	10.917	[~]	10.255	[~]
THC0290_T_0678	-1	960053	9	1355	NA	0.80973	NA	0.998334	NA	NA	NA	NA	NA	tggtcatctcggaaaaATACatttacgattgctaCAACAATCTGAAAAATATGAATTAGtt	[+]	10.584	[+]	10.625	[+]	10.732	[+]	10.602	[+]	10.863	[+]	10.246	[+]	10.776	[+]	10.065	[+]	10.836	[+]	10.56	[+]	10.715	[+]	11.073	[+]	9.962	[~]	10.044	[+]	10.268	[+]	10.354	[~]	10.738	[~]
THC0290_T_0679	-1	960143	114	309	SM1	0.987338	SigA	0.999	14	THC0290_0805	NA	Putative oxidoreductase	THC0290_v2_0859	CAAATTatcaattatcaataaccaaTTATCAATTAATTCCTATTTTTGTTcaaaatacatt	[+]	10.935	[+]	10.942	[+]	10.862	[+]	10.812	[+]	10.923	[+]	11.29	[+]	11.14	[+]	10.496	[+]	11.352	[+]	11.429	[+]	11.039	[+]	11.06	[+]	11.044	[+]	11.03	[+]	10.688	[+]	10.794	[+]	11.802	[+]
THC0290_T_0680	1	960590	5	1441	NA	0.552483	NA	0.983339	280	THC0290_N_0591	NA	new transcription segment	NA	gtatatagtgtagaacgccagaatgaattgtttaaaaaaacatcattattattgccaaaat	[~]	11.062	[-]	10.932	[~]	10.871	[-]	10.81	[~]	10.81	[~]	11.126	[~]	10.568	[~]	11.422	[~]	10.321	[~]	10.194	[-]	10.972	[-]	10.959	[~]	10.26	[-]	10.453	[-]	9.39	[-]	9.66	[-]	10.764	[-]
THC0290_T_0681	1	961125	625	1434	SM2	0.53882	SigA	1	21	THC0290_0807	ppiC	Probable peptidyl-prolyl cis-trans isomerase PpiC	THC0290_v2_0861	aaccaaatcttgtgcTTCtaactttagtatTTATTTTGTAAATTTGCACTCTAAAaataaa	[+]	13.42	[+]	13.378	[+]	13.329	[+]	13.25	[+]	13.272	[+]	12.958	[+]	13.142	[+]	10.932	[+]	13.715	[+]	14.008	[+]	13.263	[+]	13.336	[+]	13.223	[+]	13.25	[+]	13.026	[+]	13.231	[+]	13.34	[+]
THC0290_T_0682	1	962502	4	1693	NA	0.742419	NA	0.875042	143	THC0290_0808	NA	Probable transmembrane protein of unknown function	NA	tatttttttgtctattggcaataattgtaagataAGACAGTTTTATAAATACGACTAggtg	[~]	7.612	[~]	7.567	[~]	7.745	[~]	7.281	[~]	8.054	[-]	7.612	[~]	8.51	[~]	9.87	[~]	9.857	[~]	9.407	[~]	7.701	[~]	7.939	[-]	9.001	[~]	9.835	[~]	9.463	[~]	9.762	[-]	8.454	[~]
THC0290_T_0683	1	966765	8	198	SM4	1	Sig54	1	1;79	THC0290_N_0595;THC0290_0811	NA;NA	new transcription segment;Putative muramidase	NA;THC0290_v2_0865	ATTAtattttgaataacgtttttTTGGCATAGCTTTTGTGTATcaaatgtagtttttattg	[+]	10.437	[+]	10.625	[+]	10.994	[+]	10.942	[+]	11.188	[+]	11.943	[+]	11.494	[+]	12.185	[+]	12.221	[+]	13.196	[+]	10.866	[+]	11.157	[+]	13.783	[+]	12.848	[+]	12.921	[+]	13.299	[+]	12.902	[+]
THC0290_T_0684	1	967829	11	686	SM1	0.98867	SigA	1	2;455	THC0290_0812;THC0290_N_0597	fur;NA	Ferric iron uptake transcription regulator, Fur;new transcription segment	THC0290_v2_0866;NA	TTTccactttatcactttccactTTAATACTTTTTAATTATCTTTGCCggatatgacactt	[+]	10.799	[+]	10.958	[+]	10.66	[+]	10.635	[~]	10.891	[+]	11.255	[~]	11.065	[~]	11.32	[+]	11.658	[+]	12.001	[~]	10.663	[+]	10.916	[+]	12.047	[+]	11.847	[~]	11.912	[~]	11.932	[+]	11.971	[+]
THC0290_T_0685	-1	972887	3	1816	NA	0.954682	NA	0.996668	276;369	THC0290_N_0599;THC0290_0815	NA;oxaA	new transcription segment;Inner membrane protein OxaA	NA;THC0290_v2_0869	aaggaggaaccatgcgtttaggagcctggaaatgTCATTTATCAGAAAACACATTGGcaca	[+]	13.805	[+]	13.741	[+]	13.345	[+]	13.371	[+]	12.9	[+]	12.778	[+]	13.072	[+]	11.64	[+]	12.544	[+]	12.118	[+]	13.363	[+]	13.317	[+]	12.827	[~]	12.697	[+]	13.163	[+]	13.316	[+]	12.79	[+]
THC0290_T_0686	-1	973148	22	12	SM4	1	Sig54	1	NA	NA	NA	NA	NA	ATgaacaacttaaaggattagATGGCATACTAGTTGCACCAggatttggtggtcgtggcat	[~]	12.224	[~]	12.135	[~]	11.489	[~]	11.391	[~]	11.083	[~]	10.701	[~]	11.343	[~]	10.556	[~]	11.07	[~]	10.602	[~]	11.463	[~]	11.374	[+]	11.509	[+]	11.846	[~]	11.902	[~]	11.815	[~]	11.641	[+]
THC0290_T_0687	-1	973889	3	1256	NA	0.465511	NA	0.998667	NA	NA	NA	NA	NA	tttatctttcggtaatcgaaaaagaacgccgtggcGAATTTTTAGGAAAAACAGTTCaagt	[~]	11.865	[~]	12.087	[~]	11.354	[~]	11.083	[~]	10.985	[~]	10.488	[~]	11.109	[~]	11.129	[~]	10.84	[~]	10.329	[~]	11.165	[~]	11.442	[-]	9.914	[~]	9.427	[~]	10.61	[~]	10.808	[-]	9.534	[-]
THC0290_T_0688	-1	974257	4	1817	SM2	0.564812	SigA	1	32	THC0290_0816	pyrG	CTP synthase	THC0290_v2_0870	ttgtcaatcatcaattattaattatcaattAATAATTGTACTTTTGCCACGTTTTtttaca	[+]	11.927	[+]	12.052	[+]	11.528	[+]	11.082	[+]	10.741	[+]	11.36	[+]	10.947	[+]	11.403	[+]	11.085	[+]	11.274	[+]	11.377	[+]	11.448	[+]	11.105	[+]	10.01	[+]	11.031	[+]	11.237	[+]	10.134	[+]
THC0290_T_0689	-1	980405	7	1202	SM1	0.827391	SigA	0.955681	NA	NA	NA	NA	NA	tgcaccaagccattggTAAAAATCTATATTGTATTTTTGTAaataacggattattacgcaa	[~]	12.471	[~]	12.501	[~]	12.564	[~]	12.558	[~]	12.914	[-]	12.639	[~]	13.364	[~]	12.182	[~]	13.17	[~]	12.507	[~]	12.415	[~]	12.484	[~]	11.501	[~]	11.424	[~]	12.087	[~]	12.282	[~]	11.436	[~]
THC0290_T_0690	-1	981152	181	1262	SM1	0.857048	SigA	0.999	0	THC0290_0821	guaA	GMP synthase [glutamine-hydrolyzing]	THC0290_v2_0876	TTTTcataaattatattttaaaatTTAAAATTTTAAAAGTATTTTTGCAtatgcaacacaa	[+]	12.106	[+]	12.206	[+]	12.541	[+]	12.312	[+]	12.884	[+]	13.509	[+]	13.228	[+]	12.509	[+]	13.23	[+]	13.555	[+]	12.42	[+]	12.379	[+]	12.765	[+]	11.842	[+]	12.155	[+]	12.214	[+]	12.358	[+]
THC0290_T_0691	1	981245	61	1770	SM2	0.946018	SigA	0.999667	0	THC0290_0822	fjo19	Protein of unknown function Fjo19	THC0290_v2_0877	tatgaaaattttaagCATCgaaattaaatgAAAATCTGTATTTTCGCAACATGATgacaga	[+]	9.805	[+]	9.91	[+]	9.732	[+]	9.594	[+]	9.014	[+]	9.305	[+]	8.604	[+]	8.618	[+]	8.48	[+]	8.633	[+]	10.012	[+]	9.991	[+]	9.114	[+]	8.644	[+]	8.352	[+]	8.367	[+]	7.933	[+]
THC0290_T_0692	1	982323	7	688	SM5	0.604798	ND	0.604798	NA	NA	NA	NA	NA	taaaaatcataggatgtatgcttcttggtataaATTTAGTAACTTGTtgtactaaaaaaca	[~]	11.496	[~]	11.493	[+]	11.304	[+]	11.326	[+]	10.857	[+]	10.451	[+]	10.518	[~]	10.322	[+]	10.454	[+]	10.299	[~]	11.348	[+]	11.527	[+]	11.196	[+]	11.491	[+]	10.743	[+]	10.497	[+]	12.232	[+]
THC0290_T_0693	-1	985778	5	304	NA	0.73009	NA	0.847384	89;209	THC0290_N_0605;THC0290_0826	NA;NA	new transcription segment;Protein of unknown function	NA;NA	atcgctcccattagacaatcttgaaaacggtaaaTTTACTTTCGAACAAGCTGGTTTAAca	[~]	13.437	[~]	13.586	[~]	13.807	[~]	13.5	[~]	12.927	[~]	12.917	[~]	12.959	[~]	12.355	[~]	12.623	[~]	12.103	[~]	13.916	[~]	13.726	[~]	13.05	[+]	13.263	[~]	13.286	[~]	13.451	[+]	14.469	[+]
THC0290_T_0694	-1	987701	4	1703	NA	0.99067	NA	1	NA	NA	NA	NA	NA	aaacagagcagattattcgctaacagcatcacttAATGAAGTTAAAAACGAAATCTCAGga	[~]	12.941	[+]	12.988	[+]	12.922	[~]	12.766	[+]	12.218	[~]	12.001	[~]	12.431	[~]	10.592	[~]	11.058	[~]	11.224	[~]	12.876	[+]	12.985	[~]	11.898	[~]	12.167	[~]	12.055	[~]	12.197	[~]	12.705	[~]
THC0290_T_0695	-1	987945	62	1588	SM1	0.795068	SigA	0.998667	15	THC0290_0827	NA	Probable M1 family aminopeptidase precursor	THC0290_v2_0882	TTAacatttatttgtaactaaaaCGAAAAAAAATATTCTATTTTTAACgctcaaaaaaata	[+]	12.813	[+]	12.79	[+]	12.708	[+]	12.543	[+]	12.028	[+]	12.137	[+]	12.162	[+]	10.736	[+]	11.061	[+]	11.669	[+]	12.756	[+]	12.73	[+]	12.545	[+]	12.662	[+]	11.862	[+]	12.003	[+]	13.009	[+]
THC0290_T_0696	1	988805	3	1386	NA	0.943019	NA	0.999667	NA	NA	NA	NA	NA	cgatgggtcatGTAAaaatgattcaagacaaaatAGAAACTAACGAAGGGATAAATTgggc	[~]	9.709	[~]	9.921	[~]	10.876	[~]	10.715	[~]	11.09	[~]	10.882	[~]	10.837	[~]	11.143	[~]	11.091	[~]	10.916	[~]	11.068	[~]	11.253	[~]	11.854	[~]	11.975	[~]	10.998	[~]	11.095	[~]	12.892	[~]
THC0290_T_0697	1	989442	3	1371	SM2	0.640453	SigA	0.998334	2;455	THC0290_0831;THC0290_N_0607	smpB;NA	SsrA-binding protein;new transcription segment	THC0290_v2_0886;NA	aatcatttctaagtTTTGcacttcatataTTTGTTATTACATTTGCAATCCTATgctaaaa	[+]	11.705	[+]	11.645	[+]	11.34	[+]	11.218	[+]	11.165	[+]	11.367	[+]	10.823	[+]	11.867	[+]	11.479	[+]	11.729	[+]	11.476	[+]	11.388	[+]	11.618	[+]	11.268	[+]	11.258	[+]	11.423	[+]	10.939	[+]
THC0290_T_0698	1	992625	4	324	SM3	0.690103	SigA	0.999667	20;458;464	THC0290_0833;THC0290_flavo-1_0045;THC0290_N_0608	NA;NA;NA	Protein of unknown function;Flavo-1 RNA;new transcription segment	NA;NA;NA	agcatttttttaaatCTCattacgcttatAATTATGTTTATATTTGCtttctaaaaaaaaa	[+]	9.324	[+]	9.548	[+]	9.328	[+]	9.132	[+]	8.822	[+]	8.412	[+]	8.622	[+]	7.712	[+]	8.737	[+]	8.572	[+]	9.134	[+]	9.2	[+]	8.967	[+]	9.096	[+]	8.579	[+]	8.617	[+]	9.365	[+]
THC0290_T_0699	1	993198	4	836	SM1	0.929024	SigA	0.999334	16	THC0290_0834	trmD	tRNA (Guanine-N(1)-methyltransferase	THC0290_v2_0889	ATAGcaggaaatagctcctaaaaaATCTTTACAACTTTGTATCTTTGTAactttgatactc	[+]	11.319	[+]	11.291	[+]	11.286	[+]	10.91	[+]	11.162	[+]	11.356	[+]	11.529	[+]	11.405	[+]	11.762	[+]	12.103	[+]	11.097	[+]	11.249	[+]	12.048	[+]	11.735	[+]	11.608	[+]	11.714	[+]	11.639	[+]
THC0290_T_0700	1	993207	4	837	SM1	0.88104	SigA	0.996668	7	THC0290_0834	trmD	tRNA (Guanine-N(1)-methyltransferase	THC0290_v2_0889	AATagctcctaaaaaatctttacAACTTTGTATCTTTGTAACTTTGATactcaaattatgc	[+]	11.319	[+]	11.291	[+]	11.286	[+]	10.91	[+]	11.162	[+]	11.356	[+]	11.529	[+]	11.405	[+]	11.762	[+]	12.103	[+]	11.097	[+]	11.249	[+]	12.048	[+]	11.735	[+]	11.608	[+]	11.714	[+]	11.639	[+]
THC0290_T_0701	1	993973	1714	1567	SM1	0.977008	SigA	1	1;68;419;464	THC0290_N_0610;THC0290_0835;THC0290_N_0611;THC0290_N_0612	NA;rplS;NA;NA	new transcription segment;50S ribosomal protein L19;new transcription segment;new transcription segment	NA;THC0290_v2_0890;NA;NA	ATTatcaattattcattgtaaaTTATTAATAATTTCTTACTTTTGTGggctattagaccaa	[+]	13.913	[+]	13.709	[+]	13.54	[+]	13.353	[+]	13.17	[+]	14.8	[+]	13.103	[+]	14.201	[+]	14.011	[+]	15.399	[+]	13.769	[+]	13.392	[+]	15.651	[+]	14.07	[+]	13.724	[+]	14.077	[+]	14.013	[+]
THC0290_T_0702	1	994784	116	1751	SM1	0.985338	SigA	1	1;41	THC0290_N_0613;THC0290_0836	NA;icd	new transcription segment;Isocitrate dehydrogenase (NADP+)	NA;THC0290_v2_0893	ATATAgttatttaaagtaattatttTAAAATTTGATTTCTTATATTTGCTatcataatttt	[+]	13.104	[+]	13.27	[+]	13.786	[+]	13.623	[+]	13.622	[+]	13.729	[+]	13.03	[+]	13.403	[+]	12.637	[+]	12.946	[+]	13.8	[+]	13.962	[+]	12.824	[+]	12.735	[+]	12.447	[+]	12.887	[+]	13.141	[+]
THC0290_T_0703	-1	999702	4	1369	SM5	0.846385	ND	0.846385	5	THC0290_0839	NA	Protein of unknown function	NA	taaaTtagaaaaatttataaaaaaTGTGTATTTTGCCGAAATTtaaacatattaggtgata	[+]	10.696	[+]	10.625	[+]	9.998	[+]	9.924	[+]	9.812	[+]	10.292	[+]	9.801	[+]	11.602	[+]	10.261	[+]	11.259	[+]	10.554	[+]	10.371	[+]	11.467	[+]	10.666	[+]	10.007	[+]	10.023	[+]	10.213	[+]
THC0290_T_0704	-1	999712	8	1370	SM5	0.968344	ND	0.968344	15	THC0290_0839	NA	Protein of unknown function	NA	ttggtgcttctaaaTtagaaaaatttataaaaaaTGTGTATTTTGCCGAAatttaaacata	[+]	10.696	[+]	10.625	[+]	9.998	[+]	9.924	[+]	9.812	[+]	10.292	[+]	9.801	[+]	11.602	[+]	10.261	[+]	11.259	[+]	10.554	[+]	10.371	[+]	11.467	[+]	10.666	[+]	10.007	[+]	10.023	[+]	10.213	[+]
THC0290_T_0705	-1	1000504	4	533	NA	0.606798	NA	0.955015	-23	THC0290_0840	NA	Probable transmembrane protein of unknown function	THC0290_v2_0897	ttaattataaaaaattataactttaccatgttttaccttttagatattataggaacaatgg	[+]	9.973	[+]	9.867	[+]	9.557	[+]	9.768	[+]	9.873	[+]	10.051	[+]	10.347	[+]	10.918	[+]	10.649	[+]	10.434	[+]	9.717	[+]	9.615	[+]	10.212	[+]	10.203	[+]	9.991	[+]	10.105	[+]	10.161	[+]
THC0290_T_0706	1	1000798	21	1472	SM2	0.947018	SigA	0.999	23	THC0290_0841	NA	Probable tRNA/rRNA methyltransferase	THC0290_v2_0898	agtttataaatatttATTTtaaacttaaaaAAACTTAGTAACTTAGCAACTCAAAaactca	[+]	9.952	[+]	9.926	[+]	9.716	[+]	9.649	[+]	9.608	[+]	10.634	[+]	9.735	[+]	9.154	[+]	9.598	[+]	10.756	[+]	10.137	[+]	9.684	[+]	10.559	[-]	9.955	[-]	9.397	[~]	8.641	[~]	10.976	[+]
THC0290_T_0707	1	1001419	3	275	NA	0.752083	NA	0.996668	416	THC0290_0842	relA	GTP diphosphokinase	THC0290_v2_0899	agaaaacaaaattaatttttactgcgctaccttaCAAAACGCAACCCCCTATCACACTCaa	[~]	10.99	[~]	10.959	[~]	10.828	[~]	10.728	[~]	9.961	[~]	10.533	[~]	10.288	[~]	6.268	[~]	9.142	[~]	9.058	[~]	11.194	[~]	10.272	[~]	8.012	[~]	8.06	[~]	8.121	[~]	7.512	[-]	8.696	[-]
THC0290_T_0708	1	1001819	32	490	SM1	0.888371	SigA	0.98967	16	THC0290_0842	relA	GTP diphosphokinase	THC0290_v2_0899	AAAAacaaaaaaaaactttcataaTTCATTTATTTAACCTAACTTTAGGaatcgaacagca	[+]	12.262	[+]	12.109	[+]	12.842	[+]	12.301	[+]	12.579	[+]	13.297	[+]	12.796	[+]	11.72	[+]	13.423	[+]	14.086	[+]	13.191	[+]	12.651	[+]	15.297	[+]	14.815	[+]	13.652	[+]	13.213	[+]	15.961	[+]
THC0290_T_0709	1	1005385	6	1160	SM1	0.616461	SigA	1	33	THC0290_0844	NA	Glycosyl transferase, group 1 family protein	THC0290_v2_0901	ATGtagcctactgtattctcctaCTAATAATATTTTCATATATTTGTtatattcaacaaat	[+]	9.905	[+]	10.148	[+]	10.142	[+]	10.263	[+]	10.377	[+]	10.176	[+]	10.207	[+]	10.243	[+]	11.018	[+]	10.881	[+]	10.307	[+]	10.385	[+]	11.618	[+]	12.41	[+]	11.405	[+]	10.981	[+]	13.21	[+]
THC0290_T_0710	-1	1005386	4	1559	SM1	0.999667	SigA	1	13	THC0290_0843	wbsE	Putative glycosyl transferase WbsE	THC0290_v2_0900	TTTtaggtgtgatactcattaatATTATAAATAGTAAATATATTTGTTgaatataacaaat	[+]	7.922	[+]	7.914	[+]	7.597	[+]	7.342	[+]	6.909	[+]	7.141	[+]	6.597	[-]	5.562	[+]	7.272	[+]	8.871	[+]	7.527	[+]	7.527	[+]	10.273	[+]	9.296	[+]	7.108	[+]	7.316	[+]	9.758	[+]
THC0290_T_0711	1	1006478	7	189	SM1	0.995002	SigA	0.997667	38;458	THC0290_0845;THC0290_N_0618	NA;NA	Protein of unknown function;new transcription segment	NA;NA	TCTttgtaaaaaatacgccaaagATAGTATAGAATATTTATCTTTAGAaaatattagtaaa	[~]	9.143	[~]	9.448	[~]	9.64	[~]	9.866	[~]	10.06	[~]	9.973	[~]	9.819	[~]	10.141	[~]	10.248	[~]	10.358	[~]	9.774	[~]	10.012	[~]	10.488	[~]	10.599	[~]	9.893	[~]	9.824	[~]	10.368	[~]
THC0290_T_0712	1	1006513	4	190	NA	0.889703	NA	0.996668	3;423	THC0290_0845;THC0290_N_0618	NA;NA	Protein of unknown function;new transcription segment	NA;NA	atttatctttagaaaatattagtaaagagtggaaTAAATTATTAGAAAGTTAAATGAcaac	[~]	9.143	[~]	9.4	[~]	9.471	[~]	9.728	[~]	9.96	[~]	9.897	[~]	9.819	[~]	9.924	[~]	9.77	[~]	9.75	[~]	9.623	[~]	9.781	[~]	10.214	[~]	10.402	[~]	9.757	[~]	9.68	[~]	10.334	[~]
THC0290_T_0713	-1	1009245	4	605	SM1	1	SigA	1	17	THC0290_0848	yydA	Protein of unknown function YydA	THC0290_v2_0905	TTTTttgccaaaataaacaaacccTTAATTGTACTTTATTAAATTTGTAttcatttataca	[+]	9.246	[+]	9.13	[+]	9.312	[+]	9.294	[+]	9.381	[+]	10.621	[+]	9.216	[+]	9.568	[+]	10.04	[+]	11.627	[+]	9.256	[+]	9.272	[+]	10.94	[+]	9.868	[+]	8.996	[+]	9.367	[+]	10.835	[+]
THC0290_T_0714	-1	1010055	19	1535	SM2	0.870377	SigA	0.999334	116	THC0290_0850	yjeB	Protein of unknown function YjeB	THC0290_v2_0906	gaattgcaaaaagagaTTTTagtaaacgatgCAAAATATTATATTTGTGGCCCAGAacttt	[+]	7.962	[+]	8.133	[+]	8.065	[~]	7.905	[~]	7.49	[~]	7.761	[~]	7.257	[~]	7.479	[+]	8.178	[+]	8.638	[+]	8.097	[+]	8.167	[~]	8.426	[+]	8.778	[~]	8.095	[~]	8.123	[+]	8.337	[+]
THC0290_T_0715	1	1011340	14	1846	SM2	0.724092	SigA	0.999	15	THC0290_0852	nadC	Nicotinate-nucleotide diphosphorylase (carboxylating)	THC0290_v2_0908	tatcttttttaaagactacaattgttttaaATATGTATTATTTTAGCCTCATAATtttata	[+]	10.982	[+]	11.119	[+]	10.747	[+]	10.692	[+]	9.705	[+]	9.84	[+]	9.133	[+]	8.236	[+]	9.477	[+]	9.754	[+]	10.885	[+]	10.711	[+]	9.694	[+]	9.722	[+]	8.999	[+]	9.45	[+]	9.918	[+]
THC0290_T_0716	1	1013088	18	1782	SM1	0.998334	SigA	1	84	THC0290_0854	NA	Protein of unknown function	THC0290_v2_0910	TTATacggctcgataggaacattaCTCATCGTAATGTTTTATCTTTGGCtaaactgtatgg	[+]	13.364	[+]	13.473	[+]	13.877	[+]	13.376	[+]	12.881	[+]	13.617	[+]	12.492	[+]	12.53	[+]	11.663	[+]	12.932	[+]	13.903	[+]	13.741	[+]	13.089	[+]	11.759	[+]	11.526	[+]	11.688	[+]	11.806	[+]
THC0290_T_0717	-1	1017121	3	474	SM1	0.442186	SigA	0.515828	NA	NA	NA	NA	NA	tgaaactaaaaattgcttaacaaccaagccTATAGATTTACTTTTTTtagatgtagaaatg	[~]	10.095	[~]	10.14	[~]	11.279	[~]	11.253	[~]	11.791	[~]	11.919	[~]	11.736	[~]	12.773	[~]	11.856	[~]	11.775	[~]	11.268	[~]	11.525	[-]	12.942	[-]	13.402	[~]	12.323	[~]	12.141	[-]	14.389	[-]
THC0290_T_0718	-1	1017306	47	1106	SM1	0.774742	SigA	1	22	THC0290_0856	NA	Two-component system response regulatory protein, LytTR family	THC0290_v2_0912	TTTttactaaaaatatttgattaCTAAATAAAAAAAACTATATTTATTgtaccaatgtatt	[+]	10.585	[+]	10.32	[+]	11.371	[+]	11.102	[+]	11.429	[+]	12.939	[+]	11.292	[+]	12.374	[+]	11.807	[+]	13.185	[+]	11.398	[+]	11.42	[+]	15.051	[+]	14.516	[+]	12.414	[+]	12.527	[+]	15.423	[+]
THC0290_T_0719	1	1017425	871	1749	SM2	0.997334	SigA	1	28;375	THC0290_0857;THC0290_0858	rpsF;rpsR	30S ribosomal protein S6;30S ribosomal protein S18	THC0290_v2_0913;THC0290_v2_0914	atttatatatttccCTTGtatattaaaatATAAACACTACTTTTGCACCCATATttttaac	[+]	14.516	[+]	14.647	[+]	13.909	[+]	13.889	[+]	13.316	[+]	13.139	[+]	12.788	[+]	12.806	[+]	13.588	[+]	13.615	[+]	14.031	[+]	14.045	[+]	12.611	[+]	12.698	[+]	12.967	[+]	13.326	[+]	12.449	[+]
THC0290_T_0720	-1	1018768	3	1169	SM5	0.551483	ND	0.551483	NA	NA	NA	NA	NA	agttgaaagaaaatttataaattctggatgcaatTCTTCAAATTGCtctttggttagtctg	[~]	4.532	[~]	4.149	[~]	4.486	[-]	4.061	[~]	4.868	[~]	4.792	[~]	5.819	[-]	6.334	[~]	4.108	[+]	6.598	[~]	4.152	[~]	4.116	[+]	7.163	[+]	11.041	[+]	9.74	[+]	8.56	[~]	9.636	[-]
THC0290_T_0721	1	1019263	29	521	SM1	0.969344	SigA	0.995335	-42;30	THC0290_N_0626;THC0290_0861	NA;ligA	new transcription segment;DNA ligase (NAD+)	NA;THC0290_v2_0917	ATTcctgattttagggtttaaaTTCGATAAAATTGGTTATTTTAGTGctcagaaactagaa	[~]	10.789	[~]	10.718	[+]	10.572	[+]	10.51	[+]	10.751	[+]	10.602	[+]	10.532	[+]	11.163	[+]	10.52	[~]	10.488	[+]	10.838	[+]	11.056	[+]	11.203	[+]	10.894	[+]	10.291	[+]	10.5	[+]	10.93	[+]
THC0290_T_0722	1	1021437	5	834	SM1	0.942019	SigA	0.986671	NA	NA	NA	NA	NA	TAaataattcatcattgtttttATATTTATTTGCAAGTATATTTGCAagtataggaatttt	[~]	8.966	[~]	9.043	[~]	8.965	[~]	9.034	[~]	9.552	[~]	9.208	[~]	9.591	[~]	11.509	[~]	10.046	[~]	10.018	[~]	8.9	[~]	9.064	[+]	10.848	[+]	10.385	[~]	9.643	[~]	9.733	[+]	10	[+]
THC0290_T_0723	-1	1023949	5	437	NA	0.887704	NA	0.999667	NA	NA	NA	NA	NA	cgttttctaacGACGtaaagcaacaaactatcaaTTTAATAAAAAAAGATTTAGGTCagat	[~]	12.873	[~]	12.896	[~]	12.81	[~]	12.916	[~]	12.727	[~]	12.172	[~]	12.441	[~]	12.679	[~]	12.26	[~]	11.657	[~]	12.759	[~]	12.799	[~]	10.974	[~]	11.2	[~]	11.652	[~]	11.742	[~]	11.078	[~]
THC0290_T_0724	-1	1024364	53	1758	SM1	0.667777	SigA	1	34	THC0290_0866	NA	Protein of unknown function	THC0290_v2_0922	ATTAgaacactagacttcttactaTTGTTAGATTTTTAGTATTTTTGAAtagcaaaaaaaa	[+]	13.121	[+]	13.247	[+]	13.326	[+]	13.159	[+]	13.061	[+]	13.108	[+]	12.755	[+]	12.529	[+]	12.468	[+]	12.7	[+]	13.263	[+]	13.218	[+]	12.376	[+]	12.242	[+]	12.051	[+]	12.163	[+]	13.044	[+]
THC0290_T_0725	-1	1029267	4	1286	NA	0.580806	NA	0.956681	-27	THC0290_0871	bamD	Outer membrane assembly lipoprotein precursor BamD	THC0290_v2_0927	aaatcgatagttttaaaataaatatgaagaaaatACTATACacattcctaataattgcttt	[~]	12.545	[~]	12.418	[~]	12.395	[~]	12.376	[~]	12.224	[~]	11.939	[~]	12.047	[~]	12.655	[~]	11.004	[~]	11.512	[~]	12.397	[~]	12.491	[~]	12.256	[~]	12.53	[~]	12.398	[~]	12.434	[~]	11.58	[~]
THC0290_T_0726	-1	1029345	20	305	SM2	0.579807	SigA	1	-49;1;51	THC0290_N_0631;THC0290_N_0630;THC0290_0871	NA;NA;bamD	new transcription segment;new transcription segment;Outer membrane assembly lipoprotein precursor BamD	NA;NA;THC0290_v2_0927	agaactaaaataaagTTTtgtatataagaaTTAATAACTAAATTTGCAGTTCGATtttcag	[~]	12.41	[~]	12.428	[~]	12.395	[~]	12.361	[~]	12.224	[~]	11.817	[~]	12.047	[~]	12.647	[~]	11.004	[~]	11.512	[~]	12.322	[~]	12.491	[~]	12.256	[~]	12.249	[~]	12.398	[~]	12.434	[~]	11.58	[~]
THC0290_T_0727	-1	1030734	3	849	NA	0.713429	NA	0.995668	458	THC0290_0872	dapA	Dihydrodipicolinate synthase	THC0290_v2_0928	ataaaagaaatttctttaaaaaaaatattaaaaaGAAGTTTACATAACGTAAAGCCTagtt	[+]	11.326	[+]	11.51	[+]	11.696	[+]	11.738	[+]	11.65	[+]	11.798	[+]	11.643	[+]	12.187	[+]	12.044	[+]	11.843	[+]	11.768	[+]	11.81	[+]	13.279	[+]	13.684	[+]	12.786	[+]	12.671	[+]	14.869	[+]
THC0290_T_0728	1	1030822	3	1076	SM2	0.715428	SigA	0.994002	35	THC0290_0874	NA	Putative 2 ,3 -cyclic phosphodiesterase	THC0290_v2_0930	aaatttcTTTtatatactttatAAACATATTACTTTTACATATTAATcttgaaaaacaaat	[+]	9.916	[+]	9.854	[+]	10.074	[+]	9.847	[+]	10.17	[+]	11.069	[+]	10.678	[+]	11.157	[+]	10.905	[+]	11.709	[+]	9.932	[+]	10.074	[+]	11.74	[+]	11.447	[+]	10.897	[+]	11.068	[+]	12.077	[+]
THC0290_T_0729	-1	1030856	4	851	SM1	0.827724	SigA	0.999667	57	THC0290_0873	NA	Protein of unknown function	NA	ATTaaaacaaaatgttttaaaacAAGGGCACTCTTTTTTACATTTACCatgacatttgaat	[+]	7.885	[+]	7.872	[+]	8.33	[+]	7.92	[+]	8.032	[+]	8.428	[+]	8.134	[+]	9.195	[+]	7.857	[+]	9.53	[+]	8.07	[+]	8.441	[+]	11.281	[+]	11.037	[+]	10.004	[+]	10.175	[+]	11.367	[+]
THC0290_T_0730	1	1034293	13	1216	SM1	0.918027	SigA	0.943352	-32	THC0290_0878	NA	Protein of unknown function precursor, putative adhesin	NA	AActaaaatattttaaaaatgaAAAAAATTACTTTATTACTTTTATTgctagcagtgagct	[+]	6.51	[+]	6.432	[+]	7.518	[+]	7.666	[+]	7.316	[+]	7.564	[+]	7.625	[+]	5.34	[+]	7.479	[+]	7.591	[+]	7.205	[+]	7.207	[+]	7.753	[~]	6.624	[+]	6.469	[+]	7.411	[~]	6.711	[+]
THC0290_T_0731	1	1036577	7	810	SM2	0.497834	SigA	0.992336	15	THC0290_0879	NA	Glycosyl transferase, group 2 family protein	THC0290_v2_0937	agccattcgctagtcgaatggcttttttttataAAAAAACGTACCTTTGTCaaaatttttt	[+]	9.655	[+]	9.669	[+]	9.655	[+]	9.562	[+]	10.333	[+]	10.463	[+]	10.863	[+]	11.387	[+]	11.304	[+]	11.902	[+]	9.368	[+]	9.631	[+]	11.506	[+]	10.887	[+]	10.871	[+]	10.802	[+]	11.351	[+]
THC0290_T_0732	1	1037392	3	1043	SM1	0.994002	SigA	0.999	200	THC0290_0880	coaE	Dephospho-CoA kinase	THC0290_v2_0938	TTTctcggaattattagtttttTCTTAAATAATGATATAATTTTACAattatactttgttt	[~]	10.576	[~]	10.578	[~]	10.509	[~]	10.628	[+]	11.345	[+]	11.283	[~]	11.302	[~]	12.4	[~]	12.242	[~]	12.095	[~]	10.526	[~]	10.329	[+]	12.488	[+]	12.844	[+]	12.074	[+]	11.968	[+]	13.295	[+]
THC0290_T_0733	1	1038244	99	917	SM1	0.983006	SigA	1	1	THC0290_0881	rprX	Two-component system sensor histidine kinase RprX	THC0290_v2_0939	ATTtggttaatgtatttaggattTAAATGTTAAAATATTAGATTTGTAttaatgaataaaa	[~]	9.253	[+]	9.434	[~]	9.154	[+]	9.157	[+]	10.083	[+]	10.147	[+]	10.92	[+]	12.357	[+]	11.164	[~]	11.437	[~]	8.98	[+]	9.171	[+]	13.744	[+]	13.801	[+]	12.757	[+]	12.58	[+]	14.406	[+]
THC0290_T_0734	-1	1042722	3	203	SM1	0.723759	SigA	0.981006	NA	NA	NA	NA	NA	CGaactaaaaaagaagccaaagGAAAACAAGATTATGTATATTTGCTcgaagaggcttttg	[+]	11.155	[+]	11.34	[+]	11.303	[+]	11.284	[+]	11.245	[+]	11.367	[+]	10.768	[+]	11.523	[~]	10.764	[~]	10.931	[+]	11.404	[+]	11.485	[~]	11.899	[~]	11.546	[~]	11.4	[~]	11.52	[~]	11.89	[~]
THC0290_T_0735	-1	1042927	5	193	SM4	0.999334	Sig54	0.999334	29	THC0290_0885	NA	Probable lipoprotein precursor	NA	CCTtattttttttatcataaaaACGGCATCTTTTTTGAAGTGccattaaaataaaatacat	[+]	9.37	[+]	9.406	[+]	9.401	[+]	9.434	[+]	9.321	[+]	9.287	[+]	9.149	[+]	9.315	[+]	9.239	[+]	9.441	[+]	9.541	[+]	9.456	[+]	10.425	[+]	10.267	[+]	9.875	[+]	9.925	[+]	10.32	[+]
THC0290_T_0736	1	1043204	13	1774	SM1	0.993002	SigA	1	17	THC0290_0886	pyrD	Dihydroorotate oxidase	THC0290_v2_0944	TTTaaagttttcaaaccttaaatCTAAAACCAATTTTATATTTTTGCAaaacacaacacaa	[+]	10.43	[+]	10.597	[+]	10.314	[+]	10.329	[+]	10.382	[+]	10.489	[+]	10.274	[+]	10.109	[+]	10.211	[+]	9.987	[+]	10.376	[+]	10.256	[+]	9.583	[+]	9.641	[+]	9.409	[+]	9.453	[+]	9.732	[+]
THC0290_T_0737	-1	1045924	9	369	SM1	0.908697	SigA	0.921026	142	THC0290_N_0637	NA	new transcription segment	NA	ATaagtaatgcaacagctaagCAATGTAAAATTTTATATCTTCGTTtattgggattgagcg	[~]	9.337	[~]	9.576	[~]	9.859	[~]	9.582	[~]	9.547	[+]	9.707	[~]	9.325	[~]	10.233	[~]	10.27	[~]	10.582	[~]	9.705	[~]	9.821	[+]	11.03	[~]	10.958	[~]	10.248	[~]	10.055	[+]	10.903	[+]
THC0290_T_0738	-1	1046492	15	648	SM1	0.985005	SigA	1	17	THC0290_0888	NA	Protein of unknown function	NA	AAAaggctataaatatagtttatAGCTAATAAAAGCTATATATTTGTTttctttaaaagta	[+]	8.764	[+]	8.876	[+]	9.11	[+]	8.891	[+]	8.74	[+]	9.064	[+]	8.498	[+]	9.496	[+]	9.177	[+]	9.909	[+]	9.016	[+]	9.148	[+]	10.298	[+]	10.229	[+]	9.607	[+]	9.665	[+]	9.055	[+]
THC0290_T_0739	1	1046644	40	1601	SM2	0.924359	SigA	0.999667	26	THC0290_0889	guaB	IMP dehydrogenase	THC0290_v2_0948	tctcaaatctaacaTCTGaaatctaaaatTAAAACACTATATTTGCACGCAATTtaactac	[+]	11.129	[+]	11.74	[+]	11.056	[+]	10.778	[+]	9.974	[+]	10.66	[+]	10.5	[+]	9.646	[+]	11.81	[+]	12.686	[+]	11.053	[+]	10.725	[+]	11.953	[+]	11.541	[+]	11.609	[+]	11.461	[+]	10.791	[+]
THC0290_T_0740	1	1048931	362	278	SM2	0.838387	SigA	1	17	THC0290_0891	NA	Probable ATP-dependent RNA helicase, DEAD/DEAH box family	THC0290_v2_0950	ttctccatttaacaTTAGtttatttcgtttATTCGACGTACTTTTGCACCGAATTtaaaaa	[+]	12.346	[+]	12.175	[+]	10.823	[+]	10.699	[+]	11.031	[+]	10.784	[+]	12.398	[+]	11.672	[+]	12.935	[+]	12.603	[+]	10.928	[+]	10.709	[+]	12.6	[+]	13.188	[+]	13.199	[+]	13.312	[+]	12.86	[+]
THC0290_T_0741	1	1052470	21	1141	SM1	0.999	SigA	1	13	THC0290_0893	NA	Protein of unknown function precursor	NA	ATTataaaataaatcgaaaatatCTCGTGATGAATAATTACATTAGCCtaacaaactgtaa	[+]	9.313	[+]	9.294	[+]	9.626	[+]	9.588	[+]	9.781	[+]	9.98	[+]	10.137	[+]	11.491	[+]	10.097	[+]	10.679	[+]	9.32	[+]	9.676	[+]	13.799	[+]	13.789	[+]	12.506	[+]	12.259	[+]	14.859	[+]
THC0290_T_0742	1	1054101	9	1341	SM1	0.69077	SigA	0.997001	19	THC0290_0895	NA	Probable metallo-beta-lactamase	THC0290_v2_0954	CTGtgataattatcactaattatAAAAAAAAGAAGGCTTATTTTTGTCtaatcatattgaa	[~]	11.532	[~]	11.739	[~]	11.98	[~]	11.855	[~]	11.801	[-]	11.611	[~]	11.91	[-]	11.554	[-]	11.118	[-]	11.224	[~]	11.49	[~]	11.826	[-]	12.934	[-]	12.72	[~]	13.094	[~]	13.231	[-]	12.251	[-]
THC0290_T_0743	1	1056136	3	1259	SM1	0.452516	SigA	0.620127	314	THC0290_N_0643	NA	new transcription segment	NA	ttcatgatataataaattcagaaaaacccgtTTTAATAGATTTTTTTGGaacgtggtgtgg	[~]	10.529	[~]	10.46	[~]	10.398	[~]	10.458	[~]	10.498	[~]	10.297	[~]	10.762	[~]	11.521	[~]	10.115	[~]	10.231	[~]	10.191	[~]	10.413	[~]	11.5	[~]	11.673	[~]	11.995	[~]	12.125	[~]	10.838	[~]
THC0290_T_0744	1	1056449	6	1139	SM3	0.758081	SigA	0.995668	1	THC0290_N_0643	NA	new transcription segment	NA	acaagatttaaattttgTGctttttaaaattATTTTTTTTTATATTTATcattataaagtt	[~]	11.377	[+]	11.589	[+]	11.647	[+]	11.584	[+]	11.678	[+]	11.578	[+]	11.656	[+]	12.615	[+]	10.826	[+]	11.515	[+]	11.384	[+]	11.774	[+]	13.575	[+]	13.548	[+]	13.253	[+]	13.389	[+]	13.466	[+]
THC0290_T_0745	1	1063916	15	955	SM1	0.998667	SigA	1	1;76	THC0290_N_0644;THC0290_0904	NA;npdA	new transcription segment;NAD-dependent deacetylase	NA;THC0290_v2_0964	AAAATAgtgaaagagaatttatttaAATCTAATACTTTTATATCTTTGAGaaaagagacaa	[+]	9.734	[+]	9.996	[+]	10.299	[+]	10.187	[+]	10.047	[+]	11.384	[+]	9.876	[+]	9.674	[+]	10.209	[+]	11.515	[+]	10.441	[+]	10.56	[+]	12.258	[+]	11.313	[+]	10.095	[+]	10.108	[+]	12.083	[+]
THC0290_T_0746	1	1064751	49	1685	SM1	0.870043	SigA	0.999667	21	THC0290_0905	purB	Adenylosuccinate lyase	THC0290_v2_0965	ATCTaacagtctaacagtctaattTTCTAATTTTCTAATTATCTTTGCGcctttaaacaac	[+]	12.067	[+]	12.197	[+]	12.174	[+]	12.002	[+]	11.797	[+]	11.809	[+]	11.661	[+]	11.827	[+]	11.35	[+]	12.187	[+]	12.087	[+]	11.979	[+]	11.64	[+]	11.228	[+]	10.989	[+]	10.847	[+]	10.851	[+]
THC0290_T_0747	1	1066322	108	1565	SM2	0.95968	SigA	1	1;47	THC0290_N_0647;THC0290_0906	NA;NA	new transcription segment;Aminocarboxylic acid CoA-ligase	NA;THC0290_v2_0966	agctcctaaaaaaatTATGataagagagatTAAATAATTAATTTTGCAGTCGATTccgaag	[+]	12.565	[+]	12.55	[+]	12.14	[+]	12.168	[+]	11.69	[+]	12.314	[+]	11.748	[~]	11.695	[+]	12.302	[+]	13.625	[+]	12.161	[+]	12.006	[+]	13.613	[+]	12.627	[+]	12.229	[+]	12.361	[+]	12.893	[+]
THC0290_T_0748	1	1066405	12	29	NA	0.799067	NA	0.999667	-36	THC0290_0906	NA	Aminocarboxylic acid CoA-ligase	THC0290_v2_0966	tagattttaatattatggtaaaagatttattcgaAAGAATTCAAAACAATAAAGGACcatt	[~]	13.013	[~]	13.135	[~]	12.758	[~]	12.728	[~]	12.607	[+]	12.911	[+]	12.753	[~]	12.331	[+]	13.194	[+]	13.625	[~]	12.613	[~]	12.593	[+]	13.613	[+]	13.24	[+]	13.154	[+]	13.268	[+]	13.073	[+]
THC0290_T_0749	-1	1070155	4	1060	SM1	0.973675	SigA	0.999667	16	THC0290_0908	NA	Protein of unknown function	NA	AActaatttttgattcttaaaaTAATTATAAAATTACTACATTTGATttcttgaaaacttt	[+]	9.112	[+]	9.08	[+]	9.592	[+]	9.619	[+]	9.814	[+]	9.913	[+]	9.588	[+]	9.722	[+]	10.343	[+]	10.764	[+]	9.797	[+]	9.837	[+]	10.301	[+]	10.194	[+]	9.951	[+]	10.284	[+]	10.525	[+]
THC0290_T_0750	1	1070232	7	847	SM1	0.974675	SigA	0.999	14;272;422	THC0290_0909;THC0290_N_0649;THC0290_0910	NA;NA;NA	Protein of unknown function;new transcription segment;Protein of unknown function	NA;NA;THC0290_v2_0970	tATTTTAagaatcaaaaattagttttAAAAATTAGTTTTATTATTTTTGAAgaaaaattag	[+]	10.417	[+]	10.336	[+]	10.507	[+]	10.454	[+]	10.81	[+]	11.474	[+]	10.899	[+]	12.354	[+]	10.521	[+]	10.824	[+]	10.308	[+]	10.323	[+]	12.474	[+]	12.449	[+]	11.348	[+]	11.528	[+]	12.133	[+]
THC0290_T_0751	1	1070396	4	363	NA	0.885372	NA	0.980007	108;258	THC0290_N_0649;THC0290_0910	NA;NA	new transcription segment;Protein of unknown function	NA;THC0290_v2_0970	ttttgcagaaaGCTGttaataaagtgcaagataaTTTTGATAAAAATCAGAATCCGTttaa	[+]	11.772	[+]	12.115	[+]	12.309	[+]	12.321	[+]	12.403	[~]	12.133	[+]	12.26	[~]	13.282	[~]	11.296	[~]	11.105	[+]	11.483	[+]	11.93	[~]	12.916	[~]	13.206	[+]	12.482	[~]	12.062	[+]	13.255	[~]
THC0290_T_0752	1	1071640	4	1500	NA	0.516495	NA	0.998001	NA	NA	NA	NA	NA	gagtacgcaattgcacaaaacgttcccgaAGATCAAGCCAAAGAAATTGTAAaaggtttgc	[~]	10.665	[~]	10.46	[~]	10.691	[~]	11.046	[~]	10.632	[~]	10.734	[~]	10.588	[~]	10.916	[~]	10.388	[+]	10.495	[~]	10.795	[~]	10.541	[~]	9.488	[~]	9.02	[~]	9.936	[~]	9.836	[-]	7.451	[~]
THC0290_T_0753	1	1074786	49	806	SM1	0.714762	SigA	0.999667	18	THC0290_0913	pyrR1	Bifunctional protein : pyrimidine operon regulatory protein and uracil phosphoribosyltransferase	THC0290_v2_0973	TCAtgaatcgtaattgttttttaATCCAAAAAAAAACTTATTTTTGTAttacaaacaaaca	[+]	12.287	[+]	12.276	[+]	12.307	[+]	12.302	[+]	12.462	[+]	12.968	[+]	12.631	[+]	13.184	[+]	12.696	[+]	13.098	[+]	12.302	[+]	12.226	[+]	13.01	[+]	12.883	[+]	11.809	[+]	11.907	[+]	13.479	[+]
THC0290_T_0754	1	1074831	3	807	NA	0.625791	NA	0.977341	-27	THC0290_0913	pyrR1	Bifunctional protein : pyrimidine operon regulatory protein and uracil phosphoribosyltransferase	THC0290_v2_0973	gtattacaaacaaacaaactattatgagtcaaaaaattttgctcaatcacaaagaagtttc	[+]	12.182	[+]	12.152	[+]	12.045	[+]	12.103	[+]	12.33	[+]	12.742	[+]	12.555	[+]	13.035	[+]	12.635	[+]	12.859	[+]	12.132	[+]	12.026	[+]	12.847	[+]	12.835	[+]	11.797	[+]	11.865	[+]	13.342	[+]
THC0290_T_0755	1	1075134	4	458	NA	0.983006	NA	1	208	THC0290_0914	pyrB	Aspartate carbamoyltransferase	THC0290_v2_0974	aaaataaaaaaGTCAtttttatagacgatgtactCTATACAGGACGAAGTATAAATGctgc	[~]	13.134	[~]	12.896	[~]	12.756	[~]	12.702	[~]	12.905	[~]	12.83	[~]	12.837	[~]	13.405	[~]	13.069	[~]	12.564	[~]	12.677	[~]	12.88	[~]	12.312	[~]	12.516	[~]	11.928	[~]	12.044	[~]	12.836	[~]
THC0290_T_0756	1	1076835	2207	1344	SM2	0.906698	SigA	1	1;111	THC0290_N_0651;THC0290_0916	NA;rpsA	new transcription segment;30S ribosomal protein S1	NA;THC0290_v2_0976	taagttgtacaactaTTTGtgattataaaaAAAAGAATTACTTTTGCAGTTCAAAatgcag	[+]	14.757	[+]	14.591	[+]	14.129	[+]	14.128	[+]	13.991	[+]	14.355	[+]	14.165	[+]	14.944	[+]	14.61	[+]	14.812	[+]	14.335	[+]	14.297	[+]	14.98	[+]	14.711	[+]	14.351	[+]	14.466	[+]	15.181	[+]
THC0290_T_0757	1	1078933	54	956	SM1	0.543486	SigA	1	13	THC0290_0917	idi	Isopentenyl-diphosphate delta-isomerase	THC0290_v2_0977	AATaattaaaaatcatttataaaATCCCTTCTTTTTTGTATTTTTACCacgcaataaataa	[+]	11.336	[+]	11.238	[+]	11.227	[+]	11.155	[+]	11.305	[+]	11.956	[+]	11.438	[+]	11.494	[+]	11.845	[+]	12.824	[+]	11.398	[+]	11.383	[+]	12.729	[+]	12.041	[+]	11.472	[+]	11.352	[+]	12.749	[+]
THC0290_T_0758	1	1081594	42	1512	SM2	0.753082	SigA	0.999667	48;315;394	THC0290_0921;THC0290_N_0655;THC0290_tRNA_0017	NA;NA;NA	Protein of unknown function;new transcription segment;transfer RNA-Thr	NA;NA;NA	atttacatttcataGTCtatattataaagATTATATGTATTTTTGCACCCGAATtataata	[~]	13.022	[~]	13.063	[~]	12.945	[~]	12.792	[~]	12.859	[+]	13.731	[~]	12.424	[+]	11.91	[+]	11.69	[+]	12.368	[~]	13.113	[~]	12.984	[+]	12.376	[+]	11.524	[+]	11.997	[+]	12.29	[+]	11.392	[+]
THC0290_T_0759	1	1081613	18	1776	SM1	0.62879	SigA	0.641453	29;296;375	THC0290_0921;THC0290_N_0655;THC0290_tRNA_0017	NA;NA;NA	Protein of unknown function;new transcription segment;transfer RNA-Thr	NA;NA;NA	TATtataaagattatatgtatttTTGCACCCGAATTATAATATTTAATagaacaataaaat	[+]	13.16	[+]	13.149	[+]	13.065	[+]	12.914	[+]	12.989	[+]	13.737	[+]	12.615	[+]	12.093	[+]	11.762	[+]	12.388	[+]	13.266	[+]	13.1	[+]	12.438	[+]	11.653	[+]	12.031	[+]	12.468	[+]	11.642	[+]
THC0290_T_0760	1	1081976	833	1061	SM1	0.633122	SigA	1	12;191	THC0290_tRNA_0017;THC0290_0922	NA;NA	transfer RNA-Thr;Protein of unknown function	NA;NA	AAAgttctaatttattttggaaaTTAGAAATTCATCCTTATATTTGCAtcagaattaaagt	[+]	11.086	[~]	10.985	[~]	10.871	[~]	11.041	[~]	11.268	[+]	12.614	[+]	11.725	[+]	13.933	[+]	13.71	[+]	14.352	[~]	11.03	[~]	10.573	[+]	14.319	[+]	13.629	[+]	12.446	[+]	12.23	[+]	14.962	[+]
THC0290_T_0761	1	1086675	92	86	SM1	0.957014	SigA	0.999334	22;370;500	THC0290_0925;THC0290_N_0657;THC0290_0926	NA;NA;ftnA	Protein of unknown function;new transcription segment;Ferritin	NA;NA;THC0290_v2_0986	TAGatattaattattttaaagttTTAGAAAAAAACTATTACTTTTGTAaagaaatataata	[+]	11.182	[+]	11.258	[+]	11.861	[+]	11.965	[+]	12.39	[+]	12.275	[+]	12.217	[+]	12.95	[+]	12.395	[+]	12.295	[+]	11.69	[+]	11.883	[+]	12.388	[+]	12.734	[+]	11.843	[+]	11.979	[+]	13.139	[+]
THC0290_T_0762	1	1086940	5	407	NA	0.56981	NA	0.945685	105;235	THC0290_N_0657;THC0290_0926	NA;ftnA	new transcription segment;Ferritin	NA;THC0290_v2_0986	gcgattcaacacttatagaagcaaccaaaagaaatttttctaaaaaccttaccatttgcga	[~]	12.466	[~]	12.424	[~]	12.983	[~]	13.155	[~]	13.511	[~]	13.284	[~]	13.03	[~]	14.248	[~]	13.197	[~]	12.701	[~]	12.861	[~]	12.985	[~]	12.672	[~]	12.908	[~]	12.715	[~]	13.107	[~]	12.851	[~]
THC0290_T_0763	1	1087159	15	580	SM1	0.998001	SigA	1	16	THC0290_0926	ftnA	Ferritin	THC0290_v2_0986	TTTtttgttgtcacttaattaaaTATAATAATTCATATTATCTTTGTAttattaaaattaa	[+]	12.605	[~]	12.655	[~]	12.466	[~]	12.652	[~]	12.984	[~]	12.553	[~]	12.861	[~]	12.95	[~]	13.012	[~]	12.456	[~]	12.362	[~]	12.553	[~]	12.574	[~]	12.962	[~]	12.756	[~]	13.007	[+]	13.756	[+]
THC0290_T_0764	1	1087587	15	1373	NA	0.821393	NA	1	116	THC0290_N_0659	NA	new transcription segment	NA	tgattatgccacagaagagtttatgatgtggtatGTAAAAGAACAAAGAGAAGAGGAACga	[~]	12.814	[~]	12.959	[~]	12.479	[~]	12.726	[~]	12.988	[~]	12.79	[~]	12.961	[~]	12.236	[~]	13.19	[~]	12.769	[~]	12.444	[~]	12.484	[~]	12.503	[~]	12.842	[~]	12.754	[~]	13.274	[~]	12.765	[~]
THC0290_T_0765	1	1087673	25	253	NA	0.534822	NA	0.976674	30	THC0290_N_0659	NA	new transcription segment	NA	ttgatttgatcgacgaaaatgctgcctctggaagATTTGAATTAGACAAGCAAATTGcaaa	[-]	7.738	[-]	7.875	[-]	7.339	[-]	7.868	[-]	8.018	[-]	7.188	[-]	8.134	[-]	6.21	[-]	9.863	[-]	8.938	[-]	7.624	[-]	7.832	[-]	9.462	[-]	11.245	[-]	10.41	[-]	9.426	[~]	12.474	[-]
THC0290_T_0766	-1	1088030	4	980	SM1	0.980007	SigA	1	15;267	THC0290_0927;THC0290_N_0658	NA;NA	Probable ferredoxin;new transcription segment	THC0290_v2_0987;NA	TTTCaatctgtagtaaaaccaattAGATTCTCAATTTAGTATCTTTGTAtcaaatacaact	[~]	9.987	[~]	9.834	[~]	9.959	[~]	9.716	[~]	9.956	[+]	10.358	[+]	10.129	[+]	10.772	[+]	11.014	[+]	11.332	[~]	10.045	[~]	9.749	[+]	12.078	[+]	12.344	[+]	10.947	[+]	11.023	[+]	12.79	[+]
THC0290_T_0767	1	1089559	4	1564	SM1	0.977674	SigA	0.991669	14	THC0290_0929	corA	Magnesium and cobalt transport protein CorA	THC0290_v2_0989	TATTttttgtaaaaataatctttgATTTTTAAAAACAGCTATCTTTAGCtcaaattattat	[+]	10.047	[+]	10.288	[+]	10.323	[+]	10.121	[+]	9.726	[+]	10.443	[+]	9.216	[+]	10.141	[+]	9.525	[+]	10.537	[+]	10.367	[+]	10.406	[+]	10.611	[+]	10.211	[+]	9.379	[+]	9.226	[+]	11.255	[+]
THC0290_T_0768	1	1093382	4	166	SM1	0.997667	SigA	1	NA	NA	NA	NA	NA	TTTTagtcatgagtttgggcatttTTTAAACTTAATACATACTTTTGATggtggttgtact	[~]	11.138	[~]	10.985	[~]	11.765	[~]	12.27	[~]	11.812	[~]	11.7	[~]	13.208	[~]	13.629	[~]	13.605	[~]	13.27	[~]	10.364	[~]	10.435	[~]	13.247	[~]	13.824	[~]	13.962	[~]	14.035	[~]	14.5	[~]
THC0290_T_0769	-1	1097308	3	867	SM1	0.929357	SigA	0.991669	0	THC0290_0932	trmU	tRNA (5-methylaminomethyl-2-thiouridylate)-methyltransferase	THC0290_v2_0993	attttaaTTTTCAAATTAATAATATCTTTGCCtatcttaaatttcattatatgaaacgtgt	[+]	11.545	[+]	11.509	[+]	11.254	[+]	11.357	[+]	11.665	[+]	11.606	[+]	11.933	[+]	12.398	[+]	12.417	[+]	12.284	[+]	11.307	[+]	11.321	[+]	12.153	[+]	12.091	[+]	12.019	[+]	12.064	[+]	11.896	[+]
THC0290_T_0770	-1	1097325	169	868	SM1	0.996335	SigA	1	17	THC0290_0932	trmU	tRNA (5-methylaminomethyl-2-thiouridylate)-methyltransferase	THC0290_v2_0993	TAAGaattaataaaccaattttaaTTTTCAAATTAATAATATCTTTGCCtatcttaaattt	[+]	11.545	[+]	11.515	[+]	11.254	[+]	11.383	[+]	11.665	[+]	11.668	[+]	11.921	[+]	12.398	[+]	12.412	[+]	12.285	[+]	11.307	[+]	11.321	[+]	12.158	[+]	12.125	[+]	12.019	[+]	12.041	[+]	11.965	[+]
THC0290_T_0771	1	1103346	3	1784	NA	0.761746	NA	0.976008	262	THC0290_N_0666	NA	new transcription segment	NA	gttcaaactaatattatgcaagaaaccttgcacaaagaaaaattattccgacaactcttag	[~]	11.776	[~]	11.651	[+]	11.581	[+]	11.499	[+]	10.993	[+]	11.469	[~]	11.013	[+]	7.681	[+]	9.681	[+]	9.536	[+]	11.785	[+]	10.997	[+]	9.359	[+]	8.58	[+]	9.736	[~]	9.373	[~]	9.444	[+]
THC0290_T_0772	1	1103477	12	360	SM2	0.859713	SigA	0.997001	131;400	THC0290_N_0666;THC0290_0937	NA;NA	new transcription segment;Protein of unknown function containing tetratricopeptide repeats	NA;THC0290_v2_0998	cacaaaccaaatcatCTTCaaatgccaagaAAAAGGCTTAATTTTGTTCTGGTTActcttc	[~]	11.311	[~]	11.199	[~]	10.8	[~]	10.72	[~]	10.576	[~]	10.898	[~]	10.995	[+]	10.08	[+]	11.07	[+]	10.907	[-]	10.874	[~]	10.848	[+]	11.631	[+]	11.734	[+]	11.411	[+]	11.321	[+]	12.418	[+]
THC0290_T_0773	1	1103854	37	1631	SM1	0.983339	SigA	0.999	23	THC0290_0937	NA	Protein of unknown function containing tetratricopeptide repeats	THC0290_v2_0998	AAAacaaaaaaaaagtatccatTAAACATTTAAGTCCTACTTTTATTtttggataaattta	[~]	12.14	[~]	12.332	[~]	12.022	[~]	11.985	[~]	11.862	[~]	12.394	[~]	11.702	[~]	11.552	[~]	11.652	[~]	12.009	[~]	12.355	[~]	12.144	[~]	12.464	[-]	11.915	[-]	12.326	[~]	12.481	[~]	11.989	[~]
THC0290_T_0774	1	1104229	3	221	NA	0.990337	NA	1	NA	NA	NA	NA	NA	atacattcaaaaagcaaatatctgttctaaaagaGACCAACACGAAAAAGCAGTCGAATac	[~]	13.202	[~]	13.133	[~]	13.284	[+]	13.174	[+]	13.007	[+]	13.037	[+]	13.289	[+]	12.67	[~]	12.301	[~]	12.188	[+]	13.74	[+]	13.355	[~]	12.48	[~]	11.551	[~]	12.782	[~]	13.018	[~]	12.147	[~]
THC0290_T_0775	-1	1107134	4	1486	SM1	0.799733	SigA	0.997001	12	THC0290_0939	rlmF	Ribosomal RNA large subunit methyltransferase F	THC0290_v2_1000	ATacgatttctgttcattaaatTTCATTTTTTACAACTACCTTTACAaccgaaattaagat	[~]	10.344	[~]	10.385	[~]	10.425	[~]	10.13	[~]	9.56	[+]	9.942	[~]	9.359	[+]	8.464	[+]	9.701	[+]	9.55	[~]	10.322	[~]	10.299	[+]	9.458	[+]	9.456	[+]	8.779	[+]	8.503	[+]	10.129	[+]
THC0290_T_0776	1	1107507	4	145	SM1	0.614129	SigA	0.999334	495	THC0290_flavo-1_0054	NA	Flavo-1 RNA	NA	ACAatttttaataaatttcgataGCGAACAATATTGGTTAGATTTGTAatagtgtggtctg	[-]	6.291	[-]	6.435	[-]	6.006	[-]	6.645	[-]	6.556	[-]	6.436	[-]	7.093	[-]	6.507	[-]	7.843	[-]	6.9	[-]	6.24	[-]	6.138	[-]	7.044	[-]	9.3	[-]	8.016	[-]	7.098	[-]	10.496	[-]
THC0290_T_0777	-1	1107878	18	1844	SM1	0.677441	SigA	0.998667	15	THC0290_0940	NA	Probable thiamine diphosphokinase	THC0290_v2_1001	TTTTttttaaaattaaatcatataATTTTCACTTTTTCATACATTTACCccaaattataca	[+]	9.197	[+]	9.116	[+]	9.089	[+]	8.777	[+]	8.077	[+]	8.097	[+]	7.708	[+]	6.66	[+]	7.82	[+]	7.961	[+]	9.135	[+]	9.055	[+]	7.71	[+]	7.695	[+]	6.267	[+]	6.378	[+]	7.277	[+]
THC0290_T_0778	1	1108159	251	1044	SM1	0.895368	SigA	0.998334	26	THC0290_0941	NA	Protein of unknown function	THC0290_v2_1002	TAAtttttattttgctttttgttTTCATAGGTTTTTAGTATCTTCGGCataataataactg	[+]	12.089	[+]	12.159	[+]	12.613	[+]	12.64	[+]	12.811	[+]	13.168	[+]	12.401	[+]	12.964	[+]	12.637	[+]	13.383	[+]	12.688	[+]	12.796	[+]	13.867	[+]	13.45	[+]	12.45	[+]	12.657	[+]	13.909	[+]
THC0290_T_0779	1	1109415	5	676	NA	0.937687	NA	0.998667	NA	NA	NA	NA	NA	tagataagaaaaacgcattagtaactcgtgctaaAGAATTGCAAGAAAGTACAGATTttaa	[~]	12.116	[~]	12.25	[~]	12.534	[~]	12.643	[~]	12.862	[~]	12.827	[~]	12.31	[-]	13.211	[~]	12.097	[~]	12.394	[~]	12.588	[~]	12.661	[~]	12.21	[~]	12.509	[~]	12.169	[~]	12.253	[~]	12.381	[~]
THC0290_T_0780	1	1110250	79	546	SM4	0.999	Sig54	0.999	37	THC0290_0942	clpB	ATPase with chaperone activity ATP-binding subunit	THC0290_v2_1003	ACATtttgtccttttatttttaTTGGAATAACAATTGACGATtatttactataactagcta	[+]	11.42	[+]	11.333	[+]	11.409	[+]	11.362	[+]	10.774	[+]	10.718	[+]	12.988	[+]	12.037	[+]	12.395	[+]	12.973	[+]	11.409	[+]	11.235	[+]	14.771	[+]	14.739	[+]	14.652	[+]	14.459	[+]	14.363	[+]
THC0290_T_0781	1	1112414	3	1464	NA	0.954015	NA	0.986338	474	THC0290_N_0671	NA	new transcription segment	NA	atgaaggacgattaacagataataaaggacgtttAGCCGATTTTAAAAATACCATTAttat	[~]	11.124	[~]	10.98	[~]	10.91	[~]	11.223	[~]	10.611	[~]	10.033	[~]	12.403	[~]	12.808	[~]	12.26	[~]	11.937	[~]	10.73	[~]	10.694	[~]	13.873	[~]	14.615	[~]	14.627	[~]	14.515	[~]	13.766	[~]
THC0290_T_0782	-1	1114301	6	141	NA	0.74875	NA	0.999667	NA	NA	NA	NA	NA	attcttcttggttagaccaaaaatcgagcagaatgGCACTCGAAGAAAAAGTAGCTTCAAa	[~]	12.701	[~]	12.796	[~]	12.69	[~]	12.913	[~]	12.999	[~]	12.614	[~]	12.837	[~]	12.445	[~]	13.594	[~]	12.947	[~]	12.733	[~]	12.702	[~]	12.278	[~]	12.443	[~]	12.687	[~]	12.7	[~]	11.943	[~]
THC0290_T_0783	-1	1115127	122	410	SM2	0.987671	SigA	1	19	THC0290_0943	NA	Probably involved in regulation of translation initiation	THC0290_v2_1004	ctaaaacatattgctTTTGaaatcaactcaATATACATTATATTTGCACATCAATaaataa	[+]	13.109	[+]	12.984	[+]	13.18	[+]	13.106	[+]	13.502	[+]	13.528	[+]	13.258	[+]	13.24	[+]	14.044	[+]	13.991	[+]	13.263	[+]	13.172	[+]	13.867	[+]	13.339	[+]	13.14	[+]	13.288	[+]	13.95	[+]
THC0290_T_0784	1	1115243	3	1088	SM1	0.923359	SigA	0.995668	382	THC0290_0944	NA	Probable S8 subtilisin family serine endopeptidase precursor	THC0290_v2_1005	AAGagggactcaattgttcttatTTTTGCTTAATTTATTATCTTTAGTaaagtctcgaaaa	[+]	6.41	[+]	6.244	[+]	6.942	[+]	6.444	[+]	7.273	[+]	7.939	[+]	7.444	[+]	8.847	[+]	8.208	[+]	8.986	[+]	6.931	[+]	6.763	[+]	10.476	[+]	9.049	[+]	8.289	[+]	8.116	[+]	9.594	[+]
THC0290_T_0785	1	1115604	12	1097	SM3	0.986338	SigA	0.999667	21	THC0290_0944	NA	Probable S8 subtilisin family serine endopeptidase precursor	THC0290_v2_1005	cgggttaactttataTTTTaaaagtataattTCTTTGTGTATATTTGAacattcaaaaaat	[+]	9.642	[+]	9.59	[+]	10.129	[+]	10.269	[+]	10.789	[+]	11.183	[+]	10.894	[+]	10.523	[+]	11.664	[+]	11.759	[+]	10.196	[+]	10.324	[+]	12.079	[+]	11.966	[+]	11.436	[+]	11.201	[+]	12.4	[+]
THC0290_T_0786	1	1118007	3	502	NA	0.854715	NA	0.999667	394	THC0290_0946	pafA	Alkaline phosphatase precursor	THC0290_v2_1007	cccgttttgccgcttctaccgaaagttcttgccaTGATGATTTCAAAAAAACTATTAtcga	[~]	10.562	[~]	10.465	[~]	10.953	[~]	11.276	[~]	11.553	[~]	10.962	[~]	11.228	[~]	8.314	[~]	11.065	[~]	10.477	[~]	10.919	[~]	10.891	[~]	10.194	[~]	10.026	[~]	10.836	[~]	10.547	[~]	9.92	[~]
THC0290_T_0787	1	1118386	4	887	SM1	0.98967	SigA	0.999	15	THC0290_0946	pafA	Alkaline phosphatase precursor	THC0290_v2_1007	TATTCttaaccaattttaaggataaTACAAAATCTAAATGTATTTTTGTAcaaattttata	[~]	10.688	[~]	10.793	[~]	11.217	[~]	11.377	[~]	11.637	[~]	11.586	[~]	11.131	[+]	11.122	[~]	11.257	[~]	11.41	[~]	11.125	[~]	11.203	[~]	10.95	[~]	10.902	[~]	10.7	[~]	10.873	[~]	11.399	[+]
THC0290_T_0788	-1	1119912	4	576	SM4	0.999667	Sig54	0.999667	1	THC0290_N_0675	NA	new transcription segment	NA	ATTtgaattttttgagcaattgTTGGCACAATTTGTGTTATTtcttttttatcgtgtgttt	[+]	6.681	[+]	6.921	[+]	7.373	[+]	7.361	[+]	7.806	[+]	8.038	[+]	8.341	[~]	10.31	[+]	10.548	[+]	9.948	[+]	7.162	[+]	6.987	[+]	10.799	[+]	10.836	[+]	9.91	[+]	9.828	[+]	10.04	[+]
THC0290_T_0789	-1	1121204	9	1083	SM1	0.572809	SigA	0.997334	1;244	THC0290_N_0677;THC0290_0947	NA;NA	new transcription segment;Protein of unknown function precursor	NA;NA	AGCtttagttttaagttggttttATACTTACAAAGCGTTATCTTTAACcagaaatttggct	[+]	8.744	[+]	8.695	[+]	9.279	[+]	9.135	[+]	9.969	[+]	11.038	[+]	10.147	[+]	11.617	[+]	11.203	[+]	12.13	[+]	9.622	[+]	9.415	[+]	12.843	[+]	12.015	[+]	11.025	[+]	10.907	[+]	12.087	[+]
THC0290_T_0790	-1	1122395	16	1838	SM2	0.866378	SigA	0.999	22;421	THC0290_0949;THC0290_N_0678	NA;NA	Protein of unknown function;new transcription segment	THC0290_v2_1009;NA	tcataactttttgaaCTTTataattaaaaaATGACAATTAGTTTTGCAATTCAATttaaaa	[+]	7.844	[+]	7.798	[+]	6.931	[+]	6.715	[+]	5.491	[~]	4.541	[~]	4.336	[~]	4.474	[+]	5.34	[~]	3.902	[+]	7.248	[+]	7.109	[~]	4.566	[~]	4.048	[+]	5.032	[+]	5.376	[+]	6.264	[~]
THC0290_T_0791	-1	1124531	3	61	NA	0.902033	NA	0.965012	46;119;260	THC0290_N_0681;THC0290_0952;THC0290_N_0680	NA;NA;NA	new transcription segment;Fragment of Protein of unknown function precursor (part 1);new transcription segment	NA;NA;NA	tatttagaaagTAAggctggcgaattaggcaaaaATTTAGCAGAAATGACATTGGCAgaaa	[~]	10.652	[~]	10.699	[+]	10.786	[+]	10.523	[+]	10.283	[+]	12.164	[+]	10.372	[+]	12.201	[+]	9.958	[+]	11.277	[+]	10.735	[+]	10.35	[+]	8.794	[-]	6.68	[~]	8.146	[~]	7.877	[-]	7.558	[~]
THC0290_T_0792	-1	1125930	7	1302	SM1	0.969344	SigA	0.973342	33	THC0290_0954	NA	Protein of unknown function	NA	TaccaaaaaaaagataggtttTAATAAATAATTTATTAATTTCGATttttacaaattaacg	[~]	13.43	[~]	13.672	[~]	13.17	[~]	13.099	[~]	12.724	[~]	12.679	[~]	12.363	[~]	12.163	[~]	12.019	[~]	12.088	[~]	13.199	[~]	13.28	[~]	11.41	[~]	11.368	[~]	11.722	[~]	11.88	[~]	11.649	[~]
THC0290_T_0793	-1	1126567	48	1593	SM1	0.593802	SigA	1	19	THC0290_0955	def	Peptide deformylase	THC0290_v2_1015	TTATtttgttaagttttgtaactaTCATTTTAAATTATTTACTTTTGCAcattatataata	[~]	12.32	[~]	12.419	[~]	12.058	[~]	12.046	[~]	12.083	[~]	12.02	[~]	12.01	[~]	11.182	[~]	12.336	[~]	12.446	[~]	11.906	[~]	11.846	[+]	11.686	[+]	10.871	[~]	11.242	[~]	11.415	[+]	11.082	[+]
THC0290_T_0794	-1	1127137	7	1618	NA	0.744085	NA	1	400	THC0290_N_0683	NA	new transcription segment	NA	atgcttggtgctggaGtaaaaaacattccacttaCAAAATACCTAATAGAACAAGTCattc	[~]	11.841	[~]	11.83	[~]	11.194	[~]	11.276	[~]	11.302	[~]	11.196	[~]	11.593	[~]	10.277	[~]	11.915	[~]	11.551	[~]	11.239	[~]	11.189	[~]	10.041	[~]	9.535	[~]	10.462	[~]	10.571	[~]	9.804	[~]
THC0290_T_0795	-1	1128466	4	446	NA	0.538154	NA	0.627124	127;238	THC0290_N_0684;THC0290_0956	NA;mqo	new transcription segment;Malate dehydrogenase (acceptor)	NA;THC0290_v2_1016	aaaaataattttccagatATGGCAATAGAAAGAGTAGATGAACgttttacatcaaaaatgg	[-]	10.748	[-]	10.701	[-]	10.077	[-]	9.971	[-]	10.448	[-]	10.587	[-]	10.532	[-]	10.688	[~]	11.042	[-]	11.31	[-]	9.907	[-]	9.96	[~]	11.423	[~]	11.359	[-]	10.753	[~]	10.823	[~]	11.365	[~]
THC0290_T_0796	-1	1128760	16	504	SM1	0.93902	SigA	0.999667	7;421	THC0290_0957;THC0290_N_0684	NA;NA	Putative Holliday junction resolvase;new transcription segment	THC0290_v2_1017;NA	TTTTAttatataaatattttaaataAATGTATAAATAAACTAATTTTGCCaaaaaaaatgc	[+]	10.346	[+]	10.184	[+]	9.513	[+]	9.468	[+]	9.936	[+]	10.206	[+]	10.055	[+]	10.305	[+]	10.695	[+]	10.971	[+]	9.284	[+]	9.562	[+]	10.756	[+]	10.856	[+]	10.311	[+]	10.228	[+]	10.549	[+]
THC0290_T_0797	-1	1129884	44	702	NA	0.95868	NA	0.999667	NA	NA	NA	NA	NA	aaaacctagaatatattgccgaccaaaaagcaatACAAAACATAGAAGATAAAAAAGcgta	[~]	9.546	[~]	9.723	[+]	9.959	[+]	9.807	[+]	10.486	[+]	11.533	[+]	10.749	[+]	11.434	[+]	10.74	[+]	11.385	[+]	9.661	[+]	9.873	[+]	10.722	[+]	10.237	[~]	10.566	[+]	10.687	[+]	10.288	[+]
THC0290_T_0798	1	1130997	3	516	SM1	0.588804	SigA	0.928024	NA	NA	NA	NA	NA	tTTTAGTtgcacaactatttttgtagtTATCTAACTATTTTTTAAGTTTGTgttttctttg	[+]	6.059	[+]	6.395	[+]	5.982	[+]	5.755	[+]	6.126	[+]	6.729	[+]	5.973	[~]	7.433	[+]	7.435	[+]	8.405	[+]	5.964	[+]	6.072	[+]	8.47	[+]	7.729	[+]	6.622	[+]	6.516	[+]	8.961	[+]
THC0290_T_0799	1	1133548	14	21	NA	0.634788	NA	0.694768	4;97	THC0290_N_0686;THC0290_0963	NA;NA	new transcription segment;Putative dinucleotide-utilizing enzyme involved in molybdopterin and thiamine biosynthesis	NA;THC0290_v2_1023	cagaaaatagttgaGaacaactttcaaaatgtttTTTATAATATTAAAAAATAACATtgaa	[~]	9.509	[~]	9.587	[~]	9.386	[~]	9.38	[~]	9.88	[~]	9.677	[~]	10.282	[~]	11.162	[~]	11.018	[~]	10.944	[~]	9.435	[~]	9.495	[~]	10.157	[~]	10.338	[~]	10.424	[~]	10.648	[~]	10.663	[~]
THC0290_T_0800	-1	1135040	4	1682	NA	0.732756	NA	0.865378	NA	NA	NA	NA	NA	aaaaaacaattgtaacctggactactcgtggaaaATTGAGTTTTAAAGATAAATTTTtaag	[~]	10.066	[~]	10.129	[~]	10.452	[~]	10.445	[~]	10.81	[~]	11.038	[~]	10.651	[~]	11.484	[~]	10.81	[~]	10.582	[~]	10.294	[~]	10.324	[~]	9.917	[~]	9.741	[~]	9.724	[~]	10.187	[~]	10.329	[~]
THC0290_T_0801	-1	1135413	3	880	SM1	0.978007	SigA	0.986338	22	THC0290_0964	NA	Protein of unknown function precursor	NA	aAAGAATagccaaaacattaatttttTTGGAAAAAATTTTATATTTTTAACaaaattttta	[~]	9.906	[+]	10.193	[+]	10.402	[+]	10.275	[+]	10.574	[+]	10.794	[+]	10.411	[+]	11.85	[+]	11.144	[+]	11.316	[+]	10.123	[+]	10.428	[+]	11.207	[+]	11.041	[+]	10.354	[+]	10.699	[+]	11.845	[+]
THC0290_T_0802	-1	1135655	16	875	SM1	0.994335	SigA	0.998667	12;264	THC0290_0965;THC0290_0964	NA;NA	Hypothetical protein;Protein of unknown function precursor	NA;NA	tAATTTAagtggtatattattaaaatGAAATTACAATTCATTATTTTTACAaaaaaatatt	[+]	9.382	[+]	9.49	[+]	9.524	[+]	9.578	[+]	9.567	[+]	10.144	[+]	9.259	[+]	11.071	[+]	10.097	[+]	10.495	[+]	9.38	[+]	9.356	[+]	10.263	[+]	10.503	[+]	9.112	[+]	9.457	[+]	10.974	[+]
THC0290_T_0803	-1	1136785	10	233	NA	0.804732	NA	0.815062	434;480	THC0290_N_0690;THC0290_N_0689	NA;NA	new transcription segment;new transcription segment	NA;NA	tgcaaaagcggcaggaaactattcggcacaatttTACCCAACAAAATTAGCAAACGATCaa	[~]	12.829	[~]	12.984	[~]	13.155	[~]	13.153	[~]	13.164	[~]	13.025	[~]	12.596	[~]	12.534	[~]	12.476	[~]	11.951	[~]	13.282	[~]	13.292	[-]	10.777	[-]	10.193	[~]	11.145	[~]	11.447	[-]	10.234	[-]
THC0290_T_0804	-1	1137437	102	1490	SM1	0.882706	SigA	0.992336	18	THC0290_0967	NA	Branched-chain amino acid aminotransferase/4-amino-4-deoxychorismate lyase family protein	THC0290_v2_1027	AAATATttagtctaacgactacaataCGCTTTGTTTTTTACTAAATTAGCAaaaaataatt	[+]	12.563	[+]	12.605	[+]	12.755	[+]	12.762	[+]	12.868	[+]	12.855	[+]	12.195	[+]	13.172	[+]	12.935	[+]	12.719	[+]	12.774	[+]	12.866	[+]	12.025	[+]	11.517	[+]	11.322	[+]	11.462	[+]	11.706	[+]
THC0290_T_0805	1	1138375	3	759	SM1	0.619793	SigA	0.993336	31;229;255	THC0290_0969;THC0290_N_0691;THC0290_N_0692	NA;NA;NA	Protein of unknown function;new transcription segment;new transcription segment	NA;NA;NA	CTTTaatattttattatgatttttTACATTTTATATGTGTAGATTTGGAtaacacaatacc	[+]	11.936	[+]	11.74	[+]	12.221	[+]	12.144	[+]	12.274	[+]	12.77	[+]	12.288	[+]	13.621	[+]	12.11	[+]	12.433	[+]	12.352	[+]	12.217	[+]	14.495	[+]	14.871	[+]	13.321	[+]	13.654	[+]	15.395	[+]
THC0290_T_0806	-1	1139773	6	418	SM1	0.925025	SigA	0.999667	15	THC0290_0970	oxyR	Redox-sensitive transcriptional activator OxyR	THC0290_v2_1030	ATAataaaaacacaccatcgtttTAAATTATAGTTATTTATATTTGCAtcataaatagcta	[~]	8.61	[~]	8.704	[~]	8.75	[~]	8.57	[+]	8.526	[+]	8.846	[+]	8.842	[+]	8.6	[+]	8.909	[+]	9.204	[+]	8.722	[+]	8.688	[+]	8.733	[+]	7.575	[+]	8.134	[+]	8.127	[+]	9.852	[+]
THC0290_T_0807	-1	1141823	62	130	NA	0.936688	NA	0.983339	53;138	THC0290_N_0694;THC0290_0972	NA;sodC	new transcription segment;Superoxide dismutase [Cu-Zn]	NA;THC0290_v2_1032	tgccgaagacatttcaagaatgagtcacgcacacCCAACATTTGCAGAAGCTATTAAAGaa	[-]	8.921	[-]	9.092	[-]	8.608	[-]	8.769	[-]	8.24	[-]	8.188	[-]	8.282	[-]	5.979	[-]	8.719	[-]	8.527	[-]	8.52	[-]	8.567	[-]	6.651	[-]	7.303	[-]	7.816	[-]	7.878	[-]	6.551	[-]
THC0290_T_0808	-1	1142146	9	1219	NA	0.765078	NA	0.998334	376;461	THC0290_N_0694;THC0290_0972	NA;sodC	new transcription segment;Superoxide dismutase [Cu-Zn]	NA;THC0290_v2_1032	gaaggcgttatggttgccgaaattatagcaggtCAAAAACCACATATCGAttataatttaa	[~]	14.218	[~]	14.205	[~]	14.262	[~]	14.24	[~]	14.45	[+]	14.518	[~]	14.543	[+]	12.537	[+]	14.56	[+]	14.567	[~]	14.209	[~]	14.202	[+]	13.245	[~]	12.72	[~]	13.461	[+]	13.857	[~]	12.682	[~]
THC0290_T_0809	-1	1143196	758	1515	SM2	0.85105	SigA	0.993336	22	THC0290_0973	lpdA1	Dihydrolipoyl dehydrogenase	THC0290_v2_1033	gcgattaaaatttgcCCTTgccattgcaatTAAATTCGTAATATTGCAATAATAAaaacaa	[+]	12.99	[+]	12.968	[+]	12.941	[+]	12.99	[+]	12.903	[+]	13.31	[+]	12.744	[+]	10.227	[+]	12.684	[+]	12.833	[+]	12.939	[+]	12.754	[+]	12.789	[+]	12.3	[+]	11.944	[+]	11.916	[+]	12.794	[+]
THC0290_T_0810	1	1143858	8	916	SM1	0.518494	SigA	0.994668	1;23;247	THC0290_N_0696;THC0290_flavo-1_0055;THC0290_0975	NA;NA;NA	new transcription segment;Flavo-1 RNA;Cys/Met metabolism PLP-dependent enzyme	NA;NA;THC0290_v2_1035	TTTTgttttgtttgtgttgtaattAAATCTAATATTTTGTTTTTTTGAtgattgttaagtt	[+]	7.851	[+]	7.678	[+]	7.601	[+]	7.779	[+]	8.216	[+]	8.222	[+]	8.957	[~]	8.319	[+]	10.855	[+]	10.327	[+]	8.093	[+]	8.047	[+]	9.672	[+]	9.923	[+]	9.047	[+]	8.616	[+]	10.841	[+]
THC0290_T_0811	-1	1144034	4	945	SM1	0.990337	SigA	0.999334	1;315	THC0290_N_0695;THC0290_0974	NA;NA	new transcription segment;Probable transcriptional regulator, AsnC family	NA;THC0290_v2_1034	TTTtaaaataaatatattatatTTATAAAGAATTATTCACCTTTGTCcttaatttagacaa	[+]	9.658	[+]	9.728	[+]	9.726	[+]	9.628	[+]	9.608	[+]	9.968	[+]	9.888	[+]	9.883	[+]	10.774	[+]	10.989	[+]	9.921	[+]	9.949	[+]	11.599	[+]	11.797	[+]	11.131	[+]	10.61	[+]	12.578	[+]
THC0290_T_0812	1	1144081	5	1345	SM1	0.991669	SigA	0.999334	24	THC0290_0975	NA	Cys/Met metabolism PLP-dependent enzyme	THC0290_v2_1035	AATtaaggacaaaggtgaataatTCTTTATAAATATAATATATTTATTttaaaaaaaacaa	[+]	9.96	[+]	10.024	[+]	9.956	[+]	9.91	[+]	10.563	[+]	9.784	[+]	10.802	[~]	8.613	[+]	12.717	[+]	11.778	[+]	10.385	[+]	10.675	[~]	8.47	[-]	7.609	[~]	9.045	[+]	9.668	[-]	8.109	[~]
THC0290_T_0813	1	1149843	45	1168	SM1	0.98034	SigA	0.998001	30	THC0290_0978	katG	Bi-functional catalase-peroxidase	THC0290_v2_1039	AATaatcaatttcgatgcggtctTGTCTGTTTAATCTTTAATTTTGGTtaataaattgaaa	[+]	9.013	[+]	9.244	[+]	10.175	[+]	10.66	[+]	11.699	[+]	11.668	[+]	12.532	[+]	9.058	[+]	12.455	[+]	12.05	[+]	10.175	[+]	9.876	[+]	13.738	[+]	13.288	[+]	13.095	[+]	12.599	[+]	15.647	[+]
THC0290_T_0814	1	1152225	220	869	SM1	0.972343	SigA	1	31	THC0290_0979	NA	Probable peroxiredoxin	THC0290_v2_1040	ATAtaataaaagttattattatcAATCTATATAATAGCTACTTTTACAgtattaaaaaaat	[+]	13.046	[+]	13.233	[+]	13.309	[+]	13.343	[+]	14.01	[+]	13.867	[+]	14.238	[+]	14.98	[+]	13.169	[+]	13.692	[+]	13.264	[+]	13.609	[+]	14.497	[+]	14.571	[+]	13.966	[+]	14.205	[+]	15.765	[+]
THC0290_T_0815	1	1152236	6	870	SM1	0.889703	SigA	0.971676	20	THC0290_0979	NA	Probable peroxiredoxin	THC0290_v2_1040	gttattattatcAATCTATATAATAGCTACTTTTACAgtattaaaaaaataaattaaaatt	[+]	13.073	[+]	13.238	[+]	13.325	[+]	13.376	[+]	14.037	[+]	13.827	[+]	14.242	[+]	14.968	[+]	13.182	[+]	13.584	[+]	13.268	[+]	13.625	[+]	14.169	[+]	14.614	[+]	13.985	[+]	14.238	[+]	15.77	[+]
THC0290_T_0816	1	1153352	11	1212	NA	0.544818	NA	0.993669	-22;236;261	THC0290_0981;THC0290_N_0700;THC0290_N_0701	NA;NA;NA	Hypothetical protein;new transcription segment;new transcription segment	NA;NA;NA	gttctaatcatttaaaaatataaaacaaatgaagttACCAGTTATAAAGCATTTAACtcaa	[~]	11.466	[~]	11.586	[-]	11.595	[~]	11.923	[~]	12.757	[~]	12.996	[~]	13.291	[~]	14.763	[~]	12.663	[~]	12.864	[~]	11.919	[-]	11.985	[~]	13.016	[~]	12.824	[~]	12.831	[~]	12.942	[~]	12.703	[~]
THC0290_T_0817	-1	1156148	4	394	NA	0.918027	NA	0.997667	NA	NA	NA	NA	NA	taccaattacaGTAGagcaaacatttatcaatgaAAATGGTAAAAAAGAAACCAAATcgta	[~]	11.434	[~]	11.424	[~]	11.034	[~]	11.287	[~]	9.949	[~]	9.605	[~]	9.895	[~]	8.377	[~]	10.568	[~]	10.093	[~]	11.396	[~]	11.2	[~]	9.753	[~]	9.974	[~]	10.554	[~]	10.45	[-]	7.198	[-]
THC0290_T_0818	-1	1158477	6	299	NA	0.523492	NA	0.985005	NA	NA	NA	NA	NA	gcccattcgaaatttgggatgccattggtgttgaAAAAGGAATCGAAATCATGAAAGccga	[~]	11.858	[~]	11.61	[~]	11.517	[~]	11.522	[~]	10.598	[~]	9.929	[~]	10.371	[~]	8.636	[~]	10.415	[~]	9.677	[~]	11.791	[~]	11.451	[~]	9.102	[~]	10.106	[~]	10.351	[~]	10.169	[+]	10.221	[~]
THC0290_T_0819	-1	1158567	16	300	NA	0.897368	NA	0.999667	NA	NA	NA	NA	NA	ttgcttatgtttcgaacagaattcctgaaatctcTGATGAATTATACAAAATAGACGatgc	[~]	12.127	[~]	12.28	[~]	11.973	[~]	12.037	[~]	10.805	[~]	10.426	[~]	10.744	[~]	8.646	[~]	10.889	[~]	10.395	[~]	12.22	[~]	11.974	[~]	9.979	[~]	10.937	[~]	10.809	[~]	10.455	[+]	11.091	[~]
THC0290_T_0820	-1	1159156	6	315	NA	0.980673	NA	0.988337	NA	NA	NA	NA	NA	attattcctggCCCAcaaacttcaacggaagtttTGGATTTCTTAACCATATACGGAgaga	[~]	12.553	[~]	12.356	[~]	12.031	[~]	12.121	[~]	10.913	[~]	10.083	[~]	10.756	[~]	9.038	[~]	11.092	[~]	10.269	[~]	12.272	[~]	12.052	[~]	10.153	[~]	11.334	[~]	10.895	[~]	10.877	[~]	10.852	[~]
THC0290_T_0821	-1	1159748	5	1409	NA	0.96901	NA	0.999667	26	THC0290_0985	NA	3-hydroxyacyl-CoA dehydrogenase/enoyl-CoA hydratase/isomerase family protein	THC0290_v2_1046	tttatggaagtttccgaaattataaatgaattaaTACAAGAGAAAAAAATATTCAATcaaa	[~]	11.899	[~]	11.784	[~]	11.524	[~]	11.481	[+]	10.482	[~]	10.159	[+]	10.29	[~]	8.453	[+]	10.714	[~]	10.222	[+]	11.787	[+]	11.579	[~]	10.609	[~]	11.885	[~]	10.753	[~]	10.671	[~]	11.413	[~]
THC0290_T_0822	-1	1162528	3	1625	NA	0.692436	NA	0.999	206	THC0290_0987	ggt	Gamma-glutamyltransferase	THC0290_v2_1048	agcaagaagtaaattcattaaacgaaaaatttgGGAATTGGGAAAAAATAAAACGAtttga	[~]	12.749	[~]	12.69	[~]	13.007	[+]	12.963	[~]	12.532	[+]	12.785	[~]	12.226	[+]	11.885	[~]	11.929	[~]	11.991	[+]	13.266	[~]	13.014	[+]	12.19	[~]	11.615	[~]	12.178	[~]	12.057	[~]	11.184	[~]
THC0290_T_0823	-1	1164197	23	1179	SM3	0.784738	SigA	0.929357	-40;22	THC0290_N_0705;THC0290_0988	NA;fadD	new transcription segment;Long-chain-fatty-acid--CoA ligase	NA;THC0290_v2_1049	ctttaaataatcaaaaATTgtaattcttcgtATTTTTTATTAATTTGCataaaaattaacc	[+]	13.276	[+]	13.439	[+]	13.644	[+]	13.338	[+]	13.27	[+]	13.728	[+]	12.99	[+]	12.95	[+]	11.807	[+]	12.873	[+]	13.663	[+]	13.529	[+]	13.509	[+]	12.962	[+]	12.588	[+]	12.643	[+]	14.36	[+]
THC0290_T_0824	1	1166186	73	1117	SM1	0.982006	SigA	0.999667	25	THC0290_0992	NA	Putative M48 family metalloprotease	THC0290_v2_1053	TTAaagatttttatgtttacaatTAAAAAAAAATGAATTAATTTTACTagatatttcaaat	[+]	11.197	[+]	11.225	[+]	11.403	[+]	11.387	[+]	11.458	[+]	11.704	[+]	11.652	[+]	10.696	[+]	12.122	[+]	12.405	[+]	11.376	[+]	11.392	[+]	12.254	[+]	11.98	[+]	11.809	[+]	11.963	[+]	12.968	[+]
THC0290_T_0825	1	1168709	5	11	SM4	0.999334	Sig54	0.999334	1;116	THC0290_N_0709;THC0290_0994	NA;lon	new transcription segment;S16 family, ATP-dependent endopeptidase La	NA;THC0290_v2_1055	AATAtgccaaaaggattttctttATGGCACAATCCTTGACTTAtaaaagagtaatctaaat	[+]	10.683	[+]	10.601	[+]	9.771	[+]	9.686	[+]	8.715	[+]	9.372	[+]	9.641	[+]	10.546	[+]	9.319	[+]	10.478	[+]	10.045	[+]	9.983	[+]	10.992	[+]	10.013	[+]	10.564	[+]	11.179	[+]	8.786	[+]
THC0290_T_0826	1	1170700	9	167	NA	0.738421	NA	1	NA	NA	NA	NA	NA	ttgtaaaaatccttggtgttcccagactagaaagAGACAAATCAGAAAATAATGAGGtagc	[~]	13.074	[~]	12.983	[+]	12.603	[+]	12.484	[+]	11.995	[+]	11.948	[+]	12.746	[+]	11.959	[+]	13.216	[+]	13.27	[+]	12.702	[+]	12.44	[+]	12.96	[+]	12.55	[+]	13.254	[+]	13.734	[+]	12.516	[+]
THC0290_T_0827	1	1173387	3	1523	SM3	0.562812	SigA	0.997667	29	THC0290_0997	nupG	Major facilitator superfamily (MFS), H+ Symporter (NHS) family, nucleoside permease	THC0290_v2_1058	tatttaacaaaatttATttgtaaagttgtTTTTATTGTTAGTTTTACGctactaaaaaaaa	[+]	11.255	[+]	11.066	[+]	10.434	[+]	10.482	[+]	9.898	[+]	9.857	[+]	9.782	[+]	8.459	[+]	10.901	[+]	10.639	[+]	10.772	[+]	10.462	[+]	10.264	[+]	11.22	[+]	10.491	[+]	10.204	[+]	12.1	[+]
THC0290_T_0828	-1	1174789	9	1340	NA	0.998001	NA	1	71	THC0290_N_0712	NA	new transcription segment	NA	tgacgatgacgacgatGATGAtgatgaaaaaaatCATGCAAACGACAATGATTCTGACGac	[-]	5.549	[-]	5.515	[-]	5.238	[-]	6.376	[-]	4.744	[-]	4.597	[-]	7.329	[-]	5.809	[-]	7.933	[-]	7.555	[-]	5.046	[-]	5.377	[-]	5.52	[-]	5.227	[-]	4.202	[-]	5.065	[-]	6.884	[-]
THC0290_T_0829	-1	1175155	14	1210	SM1	0.899367	SigA	0.917361	29;437	THC0290_0998;THC0290_N_0712	NA;NA	Hypothetical protein;new transcription segment	THC0290_v2_1059;NA	aAAATTTatcgtagaatctgatgctacAATCGTAGTTCCACTTATTTTTGCTtacatttta	[~]	13.834	[~]	13.739	[~]	13.139	[~]	13.28	[~]	12.24	[~]	11.899	[~]	11.279	[~]	11.559	[~]	11.309	[~]	10.677	[~]	13.137	[~]	13.046	[~]	8.204	[~]	7.571	[~]	9.03	[~]	9.466	[~]	8.575	[~]
THC0290_T_0830	-1	1176113	3	1453	NA	0.462512	NA	1	6	THC0290_0999	NA	Protein of unknown function	THC0290_v2_1060	taaatctacacccaagccgtagcaaacaaatcaaaaAAACAAAAACAAAAACAAAAAtgaa	[~]	14.755	[~]	14.788	[~]	14.598	[~]	14.309	[~]	13.456	[~]	13.616	[-]	13.173	[~]	10.66	[~]	12.463	[-]	11.988	[~]	14.373	[~]	14.292	[~]	9.747	[~]	9.35	[-]	10.593	[~]	10.604	[~]	10.545	[~]
THC0290_T_0831	-1	1176924	7	148	NA	0.576475	NA	0.994335	NA	NA	NA	NA	NA	aacgaattagtaaaatgtatcaaagtttacatctCACTAAAAAAAGAATGCCCAACACtag	[~]	12.879	[~]	13.005	[~]	12.914	[~]	12.846	[~]	12.743	[~]	13.135	[~]	12.645	[~]	11.529	[~]	12.473	[~]	12.271	[~]	12.801	[~]	12.651	[~]	10.148	[~]	8.945	[~]	10.098	[~]	10.361	[~]	9.638	[~]
THC0290_T_0832	-1	1177903	614	1304	SM1	0.956348	SigA	0.999334	1;221	THC0290_N_0714;THC0290_1000	NA;speA	new transcription segment;Arginine decarboxylase	NA;THC0290_v2_1061	TTTttaataatatatatattataACATTAATATTTTTTTAAATTTGTGtcatgaataacgg	[~]	11.802	[~]	12.118	[~]	11.906	[~]	11.906	[~]	12.002	[~]	11.92	[+]	11.691	[~]	11.816	[+]	12.023	[~]	11.753	[~]	11.457	[~]	11.721	[~]	10.245	[~]	9.907	[~]	9.971	[~]	10.129	[~]	10.195	[~]
THC0290_T_0833	-1	1179052	3	1446	SM1	0.956015	SigA	0.993669	27	THC0290_1001	aroB	3-dehydroquinate synthase	THC0290_v2_1062	AATATAatatagtagcgtattttttTATACAAATTTTACTTTATTTTGCAtaaaaatatta	[+]	10.382	[+]	10.395	[+]	10.114	[+]	10.032	[+]	9.897	[+]	9.758	[+]	9.282	[+]	9.901	[+]	9.674	[+]	9.723	[+]	10.194	[+]	10.211	[+]	9.079	[+]	9.21	[+]	8.831	[+]	9.316	[+]	9.885	[+]
THC0290_T_0834	1	1179109	38	1789	SM1	0.820393	SigA	1	14	THC0290_1002	putA	Proline dehydrogenase	THC0290_v2_1063	ATAaagtaaaatttgtataaaaaAATACGCTACTATATTATATTTGCAtaacattattatt	[+]	12.89	[+]	12.759	[+]	12.831	[+]	12.733	[+]	12.643	[+]	12.664	[+]	12.167	[+]	12.185	[+]	12.466	[+]	12.236	[+]	12.862	[+]	12.692	[+]	11.821	[+]	11.568	[+]	11.335	[+]	11.602	[+]	12.071	[+]
THC0290_T_0835	1	1179415	3	64	NA	0.998667	NA	1	NA	NA	NA	NA	NA	gtttaccaaaggcgtttcttcagttttagattatTCGGTAGAAGGAAAAGAAGACGAAGca	[~]	12.625	[~]	12.984	[~]	12.947	[~]	12.768	[~]	12.782	[~]	11.838	[~]	12.296	[~]	12.294	[~]	12.213	[~]	11.34	[~]	12.745	[~]	12.901	[~]	10.895	[~]	10.838	[~]	11.42	[~]	11.42	[~]	11.477	[~]
THC0290_T_0836	1	1180267	4	1347	NA	0.824392	NA	0.995335	28	THC0290_1003	rnz	Ribonuclease Z	THC0290_v2_1064	cacttcagtagcaggaCAAAccagtcgtgaactaCTATTAATAAAAACCGAACGCAATCgc	[~]	12.783	[~]	12.563	[~]	12.577	[~]	12.714	[~]	12.488	[~]	12.52	[~]	12.402	[~]	11.664	[~]	11.358	[~]	10.842	[~]	12.636	[~]	12.554	[~]	10.217	[~]	10.785	[~]	10.985	[~]	10.988	[~]	10.358	[~]
THC0290_T_0837	1	1182024	28	561	SM1	0.965678	SigA	1	1	THC0290_N_0717	NA	new transcription segment	NA	TTTattcatataatttacaattaCATTAAATTTTACTCTATTTTTGTAgtataaaattata	[~]	8.805	[~]	8.509	[~]	8.589	[~]	8.669	[~]	8.339	[+]	9.466	[~]	8.719	[~]	10.85	[~]	8.146	[+]	9.963	[~]	8.737	[~]	8.701	[+]	11.853	[+]	11.109	[+]	9.054	[+]	9.388	[+]	10.764	[+]
THC0290_T_0838	1	1182088	24	1529	NA	0.604798	NA	0.953349	NA	NA	NA	NA	NA	atgaatttttatttaaaaaaaaagatacgaatacCTCACTTTATAAAAATATTTTTTtggt	[-]	4.338	[-]	4.505	[-]	3.897	[-]	4.465	[-]	4.464	[-]	3.89	[-]	4.498	[-]	3.914	[+]	5.527	[-]	3.919	[-]	4.05	[-]	3.906	[+]	6.339	[+]	5.92	[~]	4.039	[-]	4.568	[~]	5.628	[+]
THC0290_T_0839	-1	1186424	17	1026	SM1	0.992003	SigA	1	12	THC0290_1007	NA	Probable ATP-dependent RNA helicase, DEAD/DEAH box family	THC0290_v2_1068	AAATAaacagttaaacgaataaacaAATACACAAATAACCTATCTTTGTAcaaaattaaaa	[~]	11.205	[~]	11.167	[~]	11.285	[~]	11.192	[~]	11.345	[~]	11.709	[~]	11.563	[-]	10.765	[~]	11.801	[~]	12.282	[~]	11.42	[~]	11.307	[+]	12.605	[~]	12.017	[~]	11.636	[~]	11.576	[+]	12.756	[+]
THC0290_T_0840	-1	1187570	14	920	SM1	0.981006	SigA	1	15	THC0290_1008	NA	Arginase family protein	THC0290_v2_1069	TTAttctgtaactttaaacgcaaGTTTAAAAAAAATAGTATTTTTGATtcattataattta	[+]	10.01	[+]	10.182	[+]	10.496	[+]	10.442	[+]	10.737	[+]	10.198	[+]	10.369	[+]	10.755	[+]	10.789	[+]	10.6	[+]	10.449	[+]	10.719	[+]	10.596	[+]	11.269	[+]	10.872	[+]	11.053	[+]	11.45	[+]
THC0290_T_0841	1	1187638	41	718	SM5	0.728757	ND	0.728757	35	THC0290_1009	NA	Probable transmembrane protein of unknown function	NA	ttttttaaacttgcgtttaaagttacagaataatAATATAAATTGCGcttattaattaaca	[+]	11.869	[+]	11.958	[+]	11.521	[+]	11.542	[+]	11.187	[+]	10.958	[+]	10.471	[+]	11.879	[+]	11.033	[+]	11.267	[+]	11.927	[+]	12.03	[+]	11.869	[+]	12.04	[+]	11.855	[+]	12.138	[+]	11.985	[+]
THC0290_T_0842	-1	1189257	5	1211	NA	0.715428	NA	0.911696	NA	NA	NA	NA	NA	acatccgtttatgccttttttaacagaagaaatttggcaaatcattgcagaaagaacacca	[-]	10.83	[-]	10.896	[-]	10.907	[-]	10.934	[-]	11.126	[-]	10.894	[-]	11.302	[-]	11.791	[-]	11.889	[-]	11.491	[-]	10.702	[-]	10.782	[-]	9.727	[~]	9.982	[-]	10.628	[~]	10.847	[~]	10.344	[-]
THC0290_T_0843	1	1192356	35	331	SM1	0.726091	SigA	0.991669	17	THC0290_1012	aspC2	Probable aspartate transaminase AspC2	THC0290_v2_1075	ATTTtgagtacttttagataattaTTTAATAAAAAATTGCAAATTTGCAtatcataaaaat	[+]	12.811	[+]	12.802	[+]	12.767	[+]	12.798	[+]	12.829	[+]	12.92	[+]	12.784	[+]	12.251	[~]	12.9	[~]	12.872	[+]	13.008	[+]	12.792	[~]	12.204	[~]	12.208	[~]	11.738	[~]	12.063	[~]	12.442	[~]
THC0290_T_0844	1	1193581	23	557	NA	0.717094	NA	0.992003	-17;210;498	THC0290_N_0724;THC0290_1013;THC0290_N_0725	NA;NA;NA	new transcription segment;Hypothetical lipoprotein precursor;new transcription segment	NA;NA;NA	ctaggagaagccttaaaagtgtataaaaattaaCACTTAACGTATAAATATACAGTAtttt	[-]	11.992	[-]	12.235	[-]	11.956	[-]	12.102	[-]	12.034	[-]	11.757	[-]	11.661	[-]	11.869	[-]	11.954	[-]	11.694	[-]	12.056	[-]	12.048	[-]	10.381	[-]	10.607	[-]	10.902	[-]	11.121	[-]	10.366	[-]
THC0290_T_0845	1	1201077	61	1234	SM1	0.953016	SigA	0.997667	0;235;340	THC0290_N_0727;THC0290_flavo-1_0059;THC0290_1020	NA;NA;NA	new transcription segment;Flavo-1 RNA;Protein of unknown function precursor	NA;NA;NA	AAAgtaaaagccttggtagaaaaTAAAATTAATAAACCTACATTAGCGggaacttcaacag	[-]	4.043	[-]	4.319	[-]	5.21	[-]	4.801	[-]	4.793	[-]	4.9	[-]	6.049	[-]	5.241	[-]	5.93	[-]	6.476	[-]	5.325	[-]	5.299	[-]	6.914	[-]	5.357	[-]	6.16	[-]	6.324	[-]	7.883	[-]
THC0290_T_0846	-1	1209380	3	268	NA	0.496834	NA	0.983006	23;369	THC0290_1030;THC0290_1029	NA;NA	Sterol desaturase family protein (fragment);Sterol desaturase family protein (fragment)	NA;NA	ttcattgctagaagcaggtttgaGTGCAGAGATAATATAATCAttctttaacagcaatttt	[~]	11.045	[~]	10.812	[~]	10.546	[~]	10.875	[~]	11.521	[~]	11.606	[~]	11.296	[~]	13.736	[~]	12.14	[~]	11.551	[~]	10.762	[~]	10.643	[~]	11.205	[~]	11.421	[~]	11.044	[~]	11.169	[~]	11.168	[~]
THC0290_T_0847	-1	1210555	4	1735	SM1	0.991003	SigA	0.998001	15	THC0290_1032	prmA	50S ribosomal protein L11 lysine methyltransferase	THC0290_v2_1095	tAAGACTtttcaacattactactttaaTACTAATTTGATTCTTACCTTTGGCaaaaaataa	[+]	10.718	[+]	10.596	[+]	10.022	[+]	9.998	[+]	9.781	[+]	9.54	[+]	9.637	[+]	9.909	[+]	10.205	[+]	10.023	[+]	9.908	[+]	9.861	[+]	10.014	[+]	10.239	[+]	9.788	[+]	9.693	[+]	9.484	[+]
THC0290_T_0848	-1	1211782	5	463	SM1	0.906365	SigA	0.999	NA	NA	NA	NA	NA	AGGttttctaatggcttattttcTGTATCAAAATCTATTATTTTTGTAttaacagagattg	[~]	4.327	[~]	3.879	[~]	4.867	[~]	4.559	[~]	3.945	[+]	6.145	[+]	5.707	[~]	7.983	[~]	5.146	[+]	6.8	[~]	4.74	[~]	4.227	[+]	6.4	[~]	5.306	[~]	4.956	[~]	4.632	[-]	3.857	[+]
THC0290_T_0849	1	1212939	14	891	SM1	0.998667	SigA	1	-40;33;378	THC0290_N_0732;THC0290_1035;THC0290_N_0733	NA;NA;NA	new transcription segment;Protein of unknown function;new transcription segment	NA;NA;NA	TTTAAcctaagattgtttattatttATAATAAAAATATATTATATTTGATtttaaaataac	[+]	11.863	[+]	12.202	[+]	13.77	[+]	13.597	[+]	13.773	[+]	13.913	[+]	12.996	[+]	14.815	[+]	13.437	[+]	13.549	[+]	13.699	[+]	13.666	[+]	14.874	[+]	14.764	[+]	13.444	[+]	13.73	[+]	15.434	[+]
THC0290_T_0850	-1	1213851	77	1142	SM1	0.594469	SigA	1	18;399	THC0290_1036;THC0290_N_0734	fjo10;NA	Probable lipoprotein precursor Fjo10. Putative cation transport ATPase;new transcription segment	THC0290_v2_1099;NA	ATTctgttatttttatgaatatcAACTCATTTTTTGTATATTTTTGTtaaacaattatttt	[+]	10.9	[+]	11.061	[+]	12.002	[+]	11.889	[+]	12.205	[+]	12.593	[+]	12.308	[+]	13.241	[+]	12.143	[+]	12.164	[+]	11.723	[+]	11.79	[+]	14.129	[+]	14.144	[+]	13.535	[+]	13.387	[+]	15.265	[+]
THC0290_T_0851	-1	1216418	7	1637	NA	0.821393	NA	0.981006	3	THC0290_1039	trxB2	Thioredoxin-disulfide reductase	THC0290_v2_1102	aaaaatttaaaGTCTttagcactttaaatctttaTACTTTAGACTAGAATAAAATGAtcga	[+]	13.273	[+]	13.315	[+]	13.409	[+]	13.389	[+]	13.731	[+]	13.963	[+]	14.392	[+]	11.653	[+]	13.402	[+]	13.416	[+]	13.445	[+]	13.188	[+]	12.871	[+]	12.003	[+]	13.137	[+]	13.091	[+]	12.263	[+]
THC0290_T_0852	-1	1217643	16	1225	NA	0.932356	NA	1	NA	NA	NA	NA	NA	aataaaaaatatcattGCCGtagcctcaggaaaaGGAGGCGTAGGAAAATCTACTGTTAca	[~]	12.944	[~]	12.934	[~]	13.013	[~]	13.034	[~]	13.343	[~]	13.593	[~]	14.059	[~]	11.761	[+]	14.13	[~]	13.756	[~]	12.907	[~]	12.799	[~]	13.65	[~]	13.248	[~]	13.714	[~]	13.409	[~]	13.085	[~]
THC0290_T_0853	-1	1217683	27	421	NA	0.987671	NA	1	NA	NA	NA	NA	NA	ctgaaaaagcaaacgaaataaaaggaaaagccatTCCTGGAATAAAAAATATCATTGccgt	[~]	13.112	[~]	13.068	[+]	13.386	[~]	13.236	[+]	13.54	[+]	13.827	[+]	14.441	[~]	11.912	[+]	14.389	[~]	13.885	[~]	13.18	[~]	13.025	[~]	13.929	[~]	13.292	[~]	13.901	[~]	13.773	[~]	13.348	[~]
THC0290_T_0854	-1	1218018	29	670	SM1	0.925025	SigA	0.999334	32	THC0290_1041	mrp	ATP-binding protein, Mrp/Nbp35 family	THC0290_v2_1104	TTACaagcctattactttgtcataTTACAACTTCTTCACTATCTTTGTAataaaaactgag	[+]	12.473	[+]	12.503	[+]	12.687	[+]	12.498	[+]	12.883	[+]	13.604	[+]	13.23	[+]	13.704	[+]	13.917	[+]	14.612	[+]	12.761	[+]	12.572	[+]	15.102	[+]	14.372	[+]	14.101	[+]	13.823	[+]	14.873	[+]
THC0290_T_0855	1	1218963	4	1307	NA	0.898367	NA	0.92969	NA	NA	NA	NA	NA	atagttcttcGTCAtctataataattccgctaaAAGTATCGTTAAAAACATCTCGTaatat	[~]	6.492	[~]	5.724	[~]	5.867	[+]	6.364	[~]	5.278	[~]	6.21	[+]	5.697	[~]	9.019	[~]	4.503	[~]	8.157	[~]	6.531	[~]	5.158	[+]	7.742	[~]	4.667	[+]	6.257	[+]	5.67	[+]	5.747	[~]
THC0290_T_0856	-1	1220072	6	1650	NA	0.737421	NA	1	4;135;388	THC0290_N_0739;THC0290_N_0738;THC0290_1042	NA;NA;cafA	new transcription segment;new transcription segment;Ribonuclease G	NA;NA;THC0290_v2_1105	gcaaaagtattcgtagaaGGagtaaaaacaaataacGAAGCAACAACAAAATAAATTATTA	[~]	14.764	[~]	14.834	[+]	14.203	[+]	14.072	[+]	12.946	[+]	13.686	[+]	12.433	[+]	13.93	[+]	12.939	[+]	14.515	[+]	14.374	[+]	14.186	[+]	13.275	[~]	11.935	[~]	12.812	[~]	12.808	[~]	12.209	[~]
THC0290_T_0857	-1	1220400	296	1695	SM1	0.664778	SigA	0.999667	35;332;463	THC0290_1043;THC0290_N_0739;THC0290_N_0738	hupA;NA;NA	Histone-like bacterial DNA-binding protein HU-alpha;new transcription segment;new transcription segment	THC0290_v2_1106;NA;NA	TTTaatcatttagcttgaaatatTGTTTATTTAATTTATATATTTGCAacctcaaaaaatt	[+]	13.2	[+]	13.366	[+]	11.873	[+]	11.463	[+]	10.171	[+]	10.584	[+]	9.673	[+]	9.676	[+]	9.476	[+]	11.36	[+]	11.797	[+]	11.762	[+]	11.056	[+]	10.674	[+]	10.852	[+]	11.105	[+]	11.2	[+]
THC0290_T_0858	1	1220481	6	1511	SM1	0.994335	SigA	1	14	THC0290_1044	mutY	A/G-specific adenine glycosylase	THC0290_v2_1107	TTTCaagctaaatgattaaaatttAATCACATAAATTTTTATTTTTGCTaaccaaataatt	[+]	9.129	[+]	9.035	[+]	8.983	[+]	9.009	[+]	8.654	[+]	9.137	[+]	8.668	[~]	5.037	[+]	8.504	[+]	9.805	[+]	8.97	[+]	8.78	[+]	8.622	[~]	6.183	[+]	6.564	[+]	7.176	[~]	6.955	[+]
THC0290_T_0859	1	1221550	18	1561	SM1	0.999667	SigA	0.999667	17;450	THC0290_1045;THC0290_1046	ssb;gldD	Single-strand DNA-binding protein Ssb;Gliding motility lipoprotein precursor GldD	THC0290_v2_1108;NA	AATtttatcgagaataataggttTTAATTAAAATGCCTTATCTTTGGTtttctcaaattaa	[+]	10.43	[+]	10.634	[+]	10.658	[+]	10.647	[+]	10.287	[+]	10.395	[+]	9.642	[+]	10.41	[+]	10.03	[+]	10.196	[+]	10.601	[+]	10.766	[+]	10.611	[+]	10.599	[+]	9.86	[+]	9.973	[+]	11.117	[+]
THC0290_T_0860	1	1221775	3	1147	NA	0.917361	NA	0.998334	225	THC0290_1046	gldD	Gliding motility lipoprotein precursor GldD	NA	gtggcacaatgtaGtagttcgaaataaagctgccGAAATTTGTGAAAAATACTTGTCtaaa	[~]	10.678	[~]	10.986	[~]	10.843	[~]	10.918	[~]	10.519	[~]	10.198	[~]	10.061	[~]	10.644	[+]	10.73	[~]	10.23	[~]	10.797	[~]	10.959	[~]	10.473	[~]	11.395	[+]	10.764	[+]	10.8	[+]	12.202	[~]
THC0290_T_0861	-1	1225016	11	72	SM1	0.98967	SigA	0.999667	22	THC0290_1047	NA	Protein of unknown function precursor, putative adhesin	NA	ACTataaaaaatcactttatactTAAGAGATAAATAACTACTTTTGGGggattaaattaat	[+]	10.394	[~]	10.296	[+]	10.333	[~]	10.183	[+]	10.334	[~]	9.896	[+]	10.278	[+]	10.858	[+]	10.889	[+]	10.28	[+]	10.155	[+]	10.136	[+]	10.252	[+]	10.792	[+]	10.291	[+]	10.305	[+]	10.29	[+]
THC0290_T_0862	1	1225075	25	484	SM3	0.913362	SigA	1	1	THC0290_N_0742	NA	new transcription segment	NA	agtagttatttatcTCTtaagtataaagtGATTTTTTATAGTTTTGTtattcaaaagggtt	[+]	6.153	[+]	6.233	[+]	7.116	[+]	6.748	[+]	7.186	[+]	7.847	[+]	7.557	[+]	7.098	[+]	8.208	[+]	8.953	[+]	6.649	[+]	6.504	[+]	9.579	[+]	7.991	[+]	6.93	[+]	7.153	[+]	8.946	[+]
THC0290_T_0863	-1	1229139	3	1199	SM6	0.998001	SigECF	0.998001	22	THC0290_1050	NA	Probable ABC-type transport system, ATPase component	THC0290_v2_1113	tagtcactattttttttGTAACaaaaaacaaacgCTTTCGTCTTACTATAAttaatcaaaa	[+]	11.072	[+]	11.051	[+]	10.538	[+]	10.665	[+]	10.498	[+]	10.301	[+]	10.581	[+]	10.783	[+]	10.553	[+]	10.587	[+]	10.168	[+]	10.493	[~]	9.98	[+]	10.526	[+]	10.607	[+]	10.678	[+]	11.664	[+]
THC0290_T_0864	-1	1229765	4	219	NA	0.931689	NA	0.993336	443	THC0290_N_0744	NA	new transcription segment	NA	tgctcgctattggctaGAACAtttcctatcggtaGATGCTTTTCAGGATGAAAATTTTAaa	[~]	12.045	[~]	12.077	[~]	11.296	[~]	11.477	[~]	11.75	[~]	11.544	[~]	11.839	[~]	12.95	[~]	11.902	[~]	12.243	[~]	11.061	[~]	11.357	[~]	11.32	[~]	11.175	[~]	11.92	[~]	12.052	[~]	11.086	[~]
THC0290_T_0865	-1	1230369	6	527	NA	0.606465	NA	0.98867	-12	THC0290_1051	NA	Protein of unknown function	NA	gaacctttgccactttgtaccttataccattaaaaaaaatgattaaccttttcaacacaca	[~]	12.13	[~]	12.011	[~]	11.493	[~]	11.402	[~]	11.65	[~]	11.601	[~]	11.584	[~]	12.563	[~]	11.537	[-]	11.906	[~]	11.468	[~]	11.568	[~]	11.514	[~]	11.302	[~]	11.835	[~]	12.036	[~]	11.246	[~]
THC0290_T_0866	-1	1231397	54	392	SM1	0.978007	SigA	1	19	THC0290_1053	NA	Protein of unknown function	NA	AAATcgtaatttgtaattcgtaatTCGTAATTTATATTTTACCTTTGATgctttaataaaa	[+]	11.91	[+]	12.121	[+]	11.682	[+]	11.807	[+]	12.098	[+]	12.174	[+]	12.055	[+]	12.796	[+]	12.882	[+]	13.613	[+]	11.553	[+]	11.749	[+]	12.53	[+]	12.326	[+]	12.261	[+]	12.468	[+]	11.77	[+]
THC0290_T_0867	1	1233118	3	1762	SM2	0.961013	SigA	1	14	THC0290_1055	NA	Probable outer membrane protein precursor	THC0290_v2_1118	ttcagtaaatataaaTTTCaaatttattggTTATAATTCAACTTTGCATTATCAAaaaaac	[+]	10.693	[+]	10.877	[+]	10.194	[+]	10.259	[+]	9.237	[+]	9.281	[+]	8.838	[+]	8.326	[+]	8.279	[+]	8.835	[+]	7.662	[+]	7.525	[+]	9.422	[+]	10.413	[+]	9.584	[+]	9.208	[+]	7.694	[+]
THC0290_T_0868	1	1235377	7	1763	SM2	0.997001	SigA	0.999334	30	THC0290_1056	NA	Protein of unknown function	NA	ttcagtaaaaatcaaTTTTaaaacaaaaacAATCAATATAAATTTACATCAGAATtaaaac	[+]	12.114	[+]	12.241	[+]	11.919	[+]	12.078	[+]	11.088	[+]	11.123	[+]	10.617	[+]	10.26	[+]	9.558	[+]	10.189	[+]	9.211	[+]	9.287	[+]	10.29	[+]	10.442	[+]	10.51	[+]	10.349	[+]	8.656	[+]
THC0290_T_0869	1	1235961	5	1596	SM1	0.669444	SigA	0.998667	67;125	THC0290_N_0747;THC0290_1057	NA;NA	new transcription segment;Membrane protein containing an internal histidine kinase domain	NA;THC0290_v2_1120	TTAtgcggggaggtagaaaaagcTATCGGACTTTTTGCTACTTTTAAGccagaaacagttt	[~]	12.255	[~]	12.374	[~]	12.244	[~]	12.418	[~]	11.458	[~]	10.68	[~]	11.014	[~]	10.898	[~]	10.177	[~]	9.79	[~]	9.621	[~]	9.848	[~]	10.049	[~]	10.571	[~]	10.943	[~]	10.684	[~]	9.757	[+]
THC0290_T_0870	1	1236227	4	149	NA	0.763412	NA	0.918694	NA	NA	NA	NA	NA	tgctaatcaatcaggagtatagcctcgaaaatattggattctcctttctaattagttcttt	[~]	12.928	[~]	13.09	[~]	12.869	[~]	13.01	[~]	12.081	[~]	12.213	[~]	11.661	[~]	12.353	[~]	10.142	[~]	10.369	[~]	10.542	[~]	10.364	[~]	9.952	[~]	10.329	[~]	10.943	[~]	10.686	[~]	10.356	[-]
THC0290_T_0871	-1	1240195	3	215	SM1	0.793069	SigA	0.996335	37	THC0290_1062	NA	CDP-alcohol phosphatidyltransferase class-I family protein	THC0290_v2_1125	ACTattatttatacaaaaaataATAGCTAAAAAAGATTACTTTTGTAatctgactatattg	[+]	9.439	[+]	9.464	[+]	9.175	[+]	9.141	[+]	9.357	[+]	9.822	[+]	9.887	[+]	10.484	[+]	9.056	[+]	9.945	[+]	9.085	[+]	8.945	[+]	10.425	[+]	9.562	[+]	9.688	[+]	9.695	[+]	9.179	[+]
THC0290_T_0872	-1	1241300	4	716	SM1	0.955015	SigA	0.979007	18	THC0290_1063	coxA	Cytochrome c oxidase assembly protein	THC0290_v2_1126	ATTAtaatttgttttaaaacaaaaAATATCTAAACCATATAACTTTACAtgttgaaaattt	[~]	9.719	[~]	9.542	[~]	9.289	[~]	9.272	[~]	9.554	[~]	9.199	[~]	10.288	[~]	9.768	[~]	10.272	[~]	10.13	[~]	9.149	[~]	9.172	[+]	10.893	[~]	11.16	[~]	11.003	[~]	11.087	[~]	11.185	[+]
THC0290_T_0873	-1	1241600	8	1697	NA	0.396534	NA	-1	318	THC0290_1063	coxA	Cytochrome c oxidase assembly protein	THC0290_v2_1126	aaacccaaataagtttaagaaataccataaaaactTCGAAATTGTACGtcagaaaatcatc	[-]	9.52	[-]	9.534	[-]	9.319	[-]	9.46	[-]	9.732	[-]	9.924	[-]	10.344	[~]	9.478	[~]	11.152	[~]	11.627	[-]	9.258	[-]	9.148	[~]	10.823	[~]	10.39	[-]	10.661	[-]	10.389	[-]	9.819	[~]
THC0290_T_0874	-1	1242920	11	662	SM2	0.540153	SigA	0.998334	77;131	THC0290_N_0749;THC0290_1064	NA;cca	new transcription segment;tRNA nucleotidyltransferase	NA;THC0290_v2_1127	tattagcccagaaatTTTaaaaggtgtagaCTATGTTGTAAATTTGCATCACGAAaaaatt	[~]	11.01	[~]	11.001	[~]	11.211	[~]	11.151	[~]	11.333	[~]	11.841	[~]	12.036	[+]	11.502	[+]	12.257	[+]	13.232	[~]	11.166	[~]	11.33	[+]	12.698	[+]	12.14	[+]	12.112	[+]	11.995	[+]	13.009	[+]
THC0290_T_0875	-1	1247811	3	1683	NA	0.872043	NA	0.980007	14	THC0290_1069	gmd	GDP-mannose 4,6-dehydratase	THC0290_v2_1132	tcgggttgttttaaaaaaatgtacttttgcataaaAGCAGTTAATAAAAATTTAATATata	[+]	12.965	[+]	13.081	[+]	12.78	[+]	12.797	[+]	12.884	[+]	12.503	[+]	12.481	[+]	12.8	[+]	12.19	[+]	12.593	[+]	12.821	[+]	12.948	[+]	12.488	[+]	12.535	[+]	12.325	[+]	12.436	[+]	12.729	[+]
THC0290_T_0876	-1	1247830	7	1598	SM2	0.67011	SigA	0.999667	33	THC0290_1069	gmd	GDP-mannose 4,6-dehydratase	THC0290_v2_1132	acttttgattaattcttTTTcgggttgttttaAAAAAATGTACTTTTGCATAAAAGCagtt	[+]	13.044	[+]	13.158	[+]	12.867	[+]	12.904	[+]	12.985	[+]	12.556	[+]	12.632	[+]	13.036	[+]	12.353	[+]	12.945	[+]	12.906	[+]	13.034	[+]	12.955	[+]	12.834	[+]	12.389	[+]	12.567	[+]	12.912	[+]
THC0290_T_0877	1	1247931	3	1737	SM1	0.976674	SigA	0.999334	28	THC0290_1070	NA	Glycosyl transferase, group 1 family protein	THC0290_v2_1133	ATATCTttgtccctgaagttttattaAAAGGTAATTTAAATTACTTTTGCAtttgtttttt	[+]	11.239	[+]	11.486	[+]	11.122	[+]	10.891	[+]	10.459	[+]	10.661	[+]	10.25	[+]	10.875	[+]	10.014	[+]	10.234	[+]	10.97	[+]	11.058	[+]	10.354	[+]	10.401	[+]	10.225	[+]	10.432	[+]	10.431	[+]
THC0290_T_0878	1	1251511	7	1448	SM1	0.996001	SigA	1	13	THC0290_1073	NA	Protein of unknown function	NA	TTTtttgaaatcagaatatttaaAATCTAAAATTAGTCTATTTTTGTTtttcaaaatatat	[+]	9.745	[+]	9.847	[+]	9.493	[+]	9.617	[+]	9.37	[+]	10.362	[+]	9.012	[+]	9.941	[~]	8.77	[+]	10.21	[+]	9.622	[+]	9.685	[~]	8.74	[-]	7.845	[-]	7.866	[~]	8.779	[-]	7.832	[~]
THC0290_T_0879	-1	1259584	16	291	SM2	0.386538	SigA	0.546151	388	THC0290_1080	NA	Protein of unknown function	NA	ggcaaccgtaggaagttgtgcacaaataggAAAAAACGTACATTTATCTGGTGGCgtagga	[~]	12.457	[~]	12.398	[~]	12.467	[~]	12.645	[~]	12.772	[~]	12.35	[~]	12.462	[~]	11.943	[~]	12.949	[~]	12.448	[~]	12.406	[~]	12.42	[~]	12.07	[~]	12.706	[~]	12.311	[~]	12.416	[~]	12.694	[~]
THC0290_T_0880	-1	1260136	20	738	SM1	0.766744	SigA	0.997001	1;104	THC0290_N_0755;THC0290_1081	NA;dapD	new transcription segment;2,3,4,5-tetrahydropyridine-2,6-dicarboxylate N-succinyltransferas	NA;THC0290_v2_1145	TTACtaagtacaataatttttcaaATTGCCAAAAAAAGTTATCTTTGTTgcaaatatccta	[+]	9.382	[+]	9.331	[+]	9.585	[+]	9.351	[+]	9.668	[+]	10.062	[+]	9.729	[+]	9.496	[+]	10.774	[+]	11.224	[+]	9.58	[+]	9.689	[+]	11.132	[+]	10.701	[+]	10.472	[+]	10.601	[+]	10.517	[+]
THC0290_T_0881	-1	1265761	23	983	SM1	0.933356	SigA	0.997001	15	THC0290_1084	pabB	Para-aminobenzoate synthase component I	THC0290_v2_1148	TGTgccgaaattttttattcattACAAGTAAAATGTTGTAATTTTGTTagatattcatttt	[+]	10.529	[+]	10.296	[+]	10.359	[+]	10.24	[+]	10.849	[+]	11.945	[+]	11.556	[+]	12.876	[+]	12.48	[+]	13.415	[+]	10.411	[+]	10.08	[+]	13.468	[+]	12.585	[+]	11.828	[+]	11.87	[+]	12.889	[+]
THC0290_T_0882	1	1266412	3	1447	SM1	0.783072	SigA	0.896368	482	THC0290_1086	ddpX	D-alanyl-D-alanine dipeptidase	THC0290_v2_1150	TAGAttttcttgattttcgggttaTAAAAGCAGATGATGTTACTTTGCAaatcttgtctaa	[~]	8.86	[~]	9.317	[~]	9.17	[~]	9.291	[~]	8.733	[~]	8.6	[~]	8.681	[~]	7.611	[~]	9.709	[~]	9.714	[~]	9.417	[~]	9.812	[~]	10.621	[~]	10.401	[~]	10.984	[~]	10.996	[~]	10.531	[~]
THC0290_T_0883	-1	1273409	4	1419	SM4	0.664112	Sig54	0.664112	276	THC0290_1092	NA	Protein of unknown function	THC0290_v2_1157	TtccaattttattgatgaaaaTAGGAACGATATTTGCGCTTctatacaacatattattatc	[+]	11.603	[+]	11.365	[+]	11.061	[+]	11.34	[+]	10.839	[+]	10.629	[+]	10.697	[+]	9.105	[+]	10.498	[+]	10.321	[+]	11.211	[+]	11.106	[+]	10.137	[+]	10.614	[+]	10.383	[+]	10.393	[+]	10.598	[+]
THC0290_T_0884	1	1274217	7	1082	SM1	0.577141	SigA	0.999667	1;71	THC0290_N_0761;THC0290_1094	NA;NA	new transcription segment;Protein of unknown function precursor	NA;NA	AGAttttattttatatttgataaACCGATATAAAATATTAATTTTACAtcgaagcccaaaa	[+]	7.877	[+]	8.07	[+]	8.456	[+]	8.547	[+]	9.035	[+]	10.923	[+]	9.613	[+]	11.191	[+]	10.879	[+]	12.847	[+]	8.506	[+]	8.512	[+]	12.847	[+]	11.525	[+]	10.365	[+]	10.274	[+]	11.491	[+]
THC0290_T_0885	1	1278280	3	1337	NA	0.517494	NA	0.999	NA	NA	NA	NA	NA	gataaaggggttggagaaaacataataacaggaaATCTTTTAGAAAAAGCAAATAGTttat	[~]	9.358	[~]	9.341	[~]	9.746	[~]	9.616	[~]	9.95	[+]	10.57	[~]	9.846	[+]	9.095	[~]	9.674	[+]	10.191	[~]	9.721	[~]	9.76	[+]	9.451	[-]	7.779	[~]	9.329	[~]	9.323	[~]	9.119	[~]
THC0290_T_0886	1	1278865	48	1173	SM1	0.715761	SigA	1	-50;21	THC0290_N_0762;THC0290_1095	NA;pfkA	new transcription segment;6-phosphofructokinase	NA;THC0290_v2_1160	AAAaacaaaatttaattttatctTATTTAAAAATGTAATACCTTAGTAttctatatttcaa	[+]	12.328	[+]	12.088	[+]	12.815	[+]	12.605	[+]	12.764	[+]	12.939	[+]	12.758	[+]	10.884	[+]	12.866	[+]	12.956	[+]	12.835	[+]	12.898	[+]	13.042	[+]	14.711	[+]	13.832	[+]	13.088	[+]	13.435	[+]
THC0290_T_0887	1	1280394	7	664	NA	0.605798	NA	0.976008	NA	NA	NA	NA	NA	gccacagccgcagacaccatagtatctaacgcatCATGCACCACAAATTGCCTAGCACcac	[~]	13.021	[~]	13.011	[~]	13.809	[~]	13.556	[~]	13.529	[~]	13.532	[~]	14	[-]	10.462	[~]	13.559	[~]	13.174	[~]	14.067	[~]	13.953	[~]	12.314	[~]	12.056	[~]	13.086	[~]	12.881	[~]	12.581	[~]
THC0290_T_0888	1	1283170	23	252	SM3	0.666445	SigA	0.98134	15	THC0290_1099	NA	Protein of unknown function	THC0290_v2_1164	accaaatgtaaaccaCCcaaaataaatatTTTTTTAACTATATTTGAaataataaaatatt	[+]	9.842	[+]	9.935	[+]	11.002	[+]	10.483	[+]	10.467	[+]	10.597	[+]	10.227	[+]	7.628	[+]	10.485	[+]	11.193	[+]	11.108	[+]	10.718	[+]	12.575	[+]	11.976	[+]	10.651	[+]	10.671	[+]	12.639	[+]
THC0290_T_0889	-1	1285918	3	1727	SM1	0.954682	SigA	1	13	THC0290_1100	yojE	Probable permease YojE	THC0290_v2_1165	TAATattaaaattgaaattcggaGCAAAAGTAATTTGTTACTTTTACTccgaaattttttt	[~]	9.031	[~]	9.143	[~]	9.072	[+]	8.991	[+]	8.578	[~]	8.785	[+]	7.947	[~]	7.935	[~]	8.141	[~]	8.617	[~]	8.886	[~]	8.726	[-]	7.169	[-]	5.815	[~]	6.06	[~]	6.973	[~]	5.786	[-]
THC0290_T_0890	-1	1287147	4	938	SM1	0.850716	SigA	0.994335	NA	NA	NA	NA	NA	ACCgaaataaataagcgcaaagaAACATTAAAAATTTCTAAATTTACTaaagaaggaatta	[~]	10.367	[~]	10.263	[~]	9.684	[~]	9.59	[~]	8.624	[+]	8.743	[~]	8.047	[+]	7.495	[~]	8.583	[+]	8.749	[~]	10.113	[~]	9.966	[+]	9.627	[+]	9.568	[~]	8.372	[~]	8.591	[+]	10.162	[+]
THC0290_T_0891	-1	1288007	3	1866	SM1	0.801733	SigA	0.974009	21	THC0290_1101	NA	Putative sugar-transporting permease	THC0290_v2_1166	AGCTTtattcttgtatttaagaaaaATTAAACAATATTGTTATATTTGGCaaaattaaatt	[+]	10.042	[+]	10.036	[+]	9.655	[+]	9.226	[+]	8.2	[+]	7.375	[+]	7.186	[+]	5.805	[+]	7.739	[+]	6.837	[+]	9.85	[+]	9.536	[+]	6.827	[+]	8.037	[+]	7.703	[+]	7.903	[+]	8.154	[+]
THC0290_T_0892	-1	1288919	8	910	SM1	0.815728	SigA	0.916028	1	THC0290_N_0771	NA	new transcription segment	NA	AACTccttttttgaaagttgtttTGTATAAAGTAATCGTATGTTTAAAgtgtgtcgcatct	[~]	6.387	[~]	6.801	[~]	6.312	[~]	6.638	[~]	6.891	[-]	6.078	[~]	7.678	[-]	7.4	[+]	8.731	[~]	6.746	[~]	6.583	[~]	6.982	[-]	6.534	[+]	9.251	[+]	9.013	[~]	7.873	[+]	9.817	[+]
THC0290_T_0893	-1	1289041	3	128	SM1	0.556148	SigA	0.726758	123	THC0290_N_0771	NA	new transcription segment	NA	ATAgtatgattaggttttgaaaaGTTAAAAAATGATTATATCATAGCTaaataagaatttt	[-]	4.913	[~]	5.21	[~]	5.978	[~]	6.265	[~]	7.217	[~]	7.64	[~]	8.462	[~]	9.064	[-]	5.136	[~]	7.209	[~]	5.994	[~]	6.168	[~]	7.729	[~]	6.668	[~]	7.001	[~]	7.681	[~]	6.252	[~]
THC0290_T_0894	-1	1290950	12	422	NA	0.788737	NA	0.998667	27	THC0290_1103	fumC	Fumarate hydratase class II	THC0290_v2_1168	cctcaaaaaaaaatttcctctaccatctggctaAAAACCCAATAAACACATAACCAaatta	[+]	12.839	[+]	12.701	[+]	13.11	[+]	13.029	[+]	13.585	[+]	13.865	[+]	14.311	[~]	11.598	[+]	14.065	[~]	13.901	[+]	13.11	[+]	13.029	[~]	13.584	[~]	13.293	[~]	13.578	[+]	13.566	[+]	13.819	[~]
THC0290_T_0895	-1	1291097	23	658	SM1	0.967011	SigA	1	1;174	THC0290_N_0774;THC0290_1103	NA;fumC	new transcription segment;Fumarate hydratase class II	NA;THC0290_v2_1168	TTTattttaatacatttttttaaGCAAGTAAGAATCATTATTTTTGTAaaggttttttagg	[+]	11.1	[+]	11.214	[+]	12.024	[+]	12.005	[+]	12.644	[+]	13.2	[+]	13.51	[+]	11.922	[+]	13.529	[+]	13.812	[+]	11.75	[+]	11.766	[+]	13.656	[+]	12.958	[+]	13.186	[+]	13.039	[+]	13.345	[+]
THC0290_T_0896	1	1291196	149	714	SM1	0.995335	SigA	0.999667	23;191;234	THC0290_1104;THC0290_N_0776;THC0290_N_0777	NA;NA;NA	Hypothetical protein;new transcription segment;new transcription segment	NA;NA;NA	AATttataattattattggtaaaAAGAATAATTACATTTACATTTGTTgggtattaataaa	[+]	13.939	[+]	13.81	[+]	14.267	[+]	14.13	[+]	14.538	[+]	15.06	[+]	14.606	[+]	15.218	[+]	15.481	[+]	15.447	[+]	14.137	[+]	14.102	[+]	14.909	[+]	14.614	[+]	14.717	[+]	14.865	[+]	14.971	[+]
THC0290_T_0897	-1	1294038	4	1149	NA	0.798067	NA	0.994668	NA	NA	NA	NA	NA	ttgaagatgatgcCcaaaaattagatgctgtcgaAATTCGTGGCGAAAAAACTACTAtcga	[+]	10.857	[+]	10.862	[~]	11.033	[+]	11.32	[+]	11.576	[+]	11.494	[~]	11.506	[~]	11.792	[+]	11.333	[+]	10.976	[+]	11.044	[+]	11.096	[+]	11.487	[+]	12.127	[+]	11.55	[~]	11.497	[+]	13.129	[+]
THC0290_T_0898	1	1297185	3	1459	NA	0.796401	NA	0.998334	NA	NA	NA	NA	NA	tcatttattggACAcaagaaatatgaaaaattttGGCAAACCTCAAAAGCATGCGCAgcga	[~]	10.172	[~]	10.164	[~]	11.002	[~]	10.655	[~]	10.751	[~]	10.824	[~]	10.74	[~]	9.796	[-]	8.917	[-]	8.728	[~]	11.098	[~]	11.2	[-]	8.323	[-]	8.435	[~]	9.32	[~]	9.736	[-]	8.95	[-]
THC0290_T_0899	-1	1300302	8	679	SM2	0.557148	SigA	0.996335	19;343;406	THC0290_1114;THC0290_N_0781;THC0290_1113	NA;NA;NA	Probable transcriptional regulator, ArsR family;new transcription segment;Protein of unknown function	THC0290_v2_1179;NA;NA	taattgcataatattTTGcaattaacattaCAATATCGTAATATTGCAATATATTaatata	[+]	8.649	[+]	8.787	[+]	8.858	[+]	8.727	[+]	9.848	[+]	10.432	[+]	12.028	[+]	11.9	[+]	11.556	[+]	12.632	[+]	9.118	[+]	9.067	[+]	15.655	[+]	15.413	[+]	13.838	[+]	13.602	[+]	15.736	[+]
THC0290_T_0900	1	1300658	298	1729	SM1	0.517827	SigA	0.999334	18	THC0290_1115	tpx	Thiol peroxidase	THC0290_v2_1180	TTcgcaattcataattcacaattCATAATTATTTTTACTACTTTTGAAactcattaaaaat	[+]	12.475	[+]	12.344	[+]	12.485	[+]	12.487	[+]	12.302	[+]	11.775	[+]	12.051	[+]	12.456	[+]	11.807	[+]	11.716	[+]	12.426	[+]	12.582	[+]	11.104	[+]	11.404	[+]	11.587	[+]	11.847	[+]	11.4	[+]
THC0290_T_0901	1	1300679	7	1730	NA	0.390536	NA	0.997667	-3;497	THC0290_1115;THC0290_1116	tpx;dgkA	Thiol peroxidase;Diacylglycerol kinase	THC0290_v2_1180;THC0290_v2_1181	ttcataattatttttactacttttgaaactcattaaAAATATCAAAAATGGCATCAGTAac	[+]	12.02	[+]	12.004	[+]	11.975	[+]	12.128	[+]	12.017	[+]	11.151	[+]	11.587	[+]	12.197	[+]	11.366	[+]	11.161	[+]	11.996	[+]	12.28	[+]	10.519	[~]	10.999	[~]	11.292	[+]	11.529	[~]	10.857	[+]
THC0290_T_0902	1	1304816	6	1193	SM1	0.977674	SigA	0.992669	47	THC0290_1119	NA	Probable transmembrane protein of unknown function	THC0290_v2_1184	ATTCTttcaaaaccaaccaaacattGCCAAAAAATCAGTTTACTTTTGTGcaaagtaaata	[-]	9.502	[-]	9.416	[-]	9.695	[-]	9.667	[-]	9.704	[-]	9.372	[-]	9.675	[-]	10.794	[-]	8.759	[-]	8.438	[-]	9.854	[-]	9.816	[~]	9.89	[~]	9.996	[-]	9.112	[-]	9.51	[~]	9.421	[~]
THC0290_T_0903	1	1306617	8	347	NA	0.473509	NA	0.998001	NA	NA	NA	NA	NA	gacagcttttactgtttctatcgatttgaaaggcAATGGTGTAACAACAGGAATATCTGca	[~]	11.67	[~]	11.938	[~]	11.649	[~]	11.69	[~]	11.45	[~]	10.931	[~]	11.087	[~]	10.646	[~]	9.716	[~]	9.059	[~]	11.455	[~]	11.458	[~]	9.845	[~]	10.193	[~]	10.382	[~]	10.248	[+]	10.82	[~]
THC0290_T_0904	1	1307549	1228	1067	SM2	0.919027	SigA	1	0;27;115;376	THC0290_N_0784;THC0290_tRNA_0018;THC0290_N_0785;THC0290_1121	NA;NA;NA;NA	new transcription segment;transfer RNA-Ser;new transcription segment;Probable transposase	NA;NA;NA;THC0290_v2_1186	ttattcaaaaaagtTTTGcataaacaaaaAAGGTTCTTATATTTGCACTCGCAAtcaggta	[+]	10.746	[+]	11.124	[+]	11.963	[+]	11.254	[+]	12.014	[+]	15.181	[+]	12.799	[+]	14.762	[+]	14.364	[+]	16.227	[+]	11.409	[+]	11.356	[+]	16.111	[+]	15.222	[+]	13.618	[+]	13.192	[+]	15.791	[+]
THC0290_T_0905	1	1307576	27292	1068	NA	0.432522	NA	0.769077	-27;0;88;349	THC0290_N_0784;THC0290_tRNA_0018;THC0290_N_0785;THC0290_1121	NA;NA;NA;NA	new transcription segment;transfer RNA-Ser;new transcription segment;Probable transposase	NA;NA;NA;THC0290_v2_1186	aaaaggttcttatatttgcactcgcaatcaggtaaTGAAAGCGATGTACtggagaaatggc	[~]	10.705	[~]	11.014	[+]	11.865	[~]	11.133	[+]	11.978	[+]	15.06	[+]	12.782	[+]	14.67	[+]	14.248	[+]	16.175	[+]	11.301	[+]	11.221	[+]	16.093	[+]	15.1	[+]	13.44	[+]	13.077	[+]	15.699	[+]
THC0290_T_0906	-1	1307777	10	940	SM3	0.499833	SigA	0.986005	NA	NA	NA	NA	NA	ctggtggtcctctgtgagaggtgtcactTAAATTTTTGTAATTTAGTGacacctcgaaaga	[~]	4.166	[~]	4.53	[~]	4.791	[~]	4.805	[+]	5.023	[~]	4.961	[+]	5.466	[~]	4.642	[+]	5.976	[+]	6.282	[~]	4.292	[~]	4.244	[~]	7.123	[+]	6.976	[+]	6.167	[+]	5.335	[+]	7.603	[+]
THC0290_T_0907	-1	1315976	3	336	NA	0.686438	NA	0.945685	165	THC0290_1126	NA	Protein of unknown function	NA	ctctcaaaacgttattctcctataactgcggtacagcgcctaggctttttacttgaagaga	[~]	10.098	[~]	9.795	[~]	9.589	[~]	9.377	[~]	8.852	[~]	8.693	[~]	8.702	[~]	7.79	[~]	9.194	[~]	8.511	[~]	9.856	[~]	9.688	[~]	8.948	[~]	9.353	[~]	8.385	[~]	8.642	[~]	8.035	[~]
THC0290_T_0908	-1	1317203	14	876	NA	0.450183	NA	0.521826	0;254	THC0290_1128;THC0290_N_0787	NA;NA	Hypothetical protein;new transcription segment	THC0290_v2_1193;NA	gcgtgctttagtgcgcattattttttgttgattgACTTTCCTTTGTTagtatgattgaagc	[+]	9.043	[+]	9.148	[+]	9.19	[+]	9.117	[+]	9.17	[+]	10.397	[+]	9.259	[+]	10.243	[+]	9.629	[+]	10.765	[+]	9.059	[+]	9.285	[+]	10.801	[+]	10.027	[+]	8.875	[+]	9.472	[+]	11.033	[+]
THC0290_T_0909	1	1317284	18	1109	SM1	0.997001	SigA	1	1	THC0290_N_0788	NA	new transcription segment	NA	TAatgcgcactaaagcacgcatATTGAAATATTTTGTTATATTTGTTtccaattacataca	[+]	7.341	[+]	6.853	[+]	7.915	[+]	7.537	[+]	7.457	[+]	9.629	[+]	8.286	[+]	9.697	[+]	9.921	[+]	10.899	[+]	8.036	[+]	8.029	[+]	10.504	[+]	9.898	[+]	8.883	[+]	9.133	[+]	9.467	[+]
THC0290_T_0910	1	1317401	10	911	NA	0.620127	NA	0.782739	414	THC0290_1129	NA	SusC/RagA family TonB-dependent receptor precursor	THC0290_v2_1194	aaaactggtaattttaaaaggaacgaaatgataaGTACGATGCTCACGTCCCATGGCgtgg	[~]	6.921	[~]	6.959	[~]	7.43	[~]	7.636	[~]	8.106	[-]	8.039	[~]	8.257	[~]	9.092	[~]	10.071	[-]	9.195	[~]	7.721	[~]	7.55	[~]	9.809	[~]	9.562	[~]	9.354	[~]	9.198	[+]	9.583	[~]
THC0290_T_0911	-1	1317803	4	109	SM1	0.978007	SigA	1	1	THC0290_N_0789	NA	new transcription segment	NA	TATtgtagcccaacgatttaagaTTGAATTTTTATTCATACTTTTGGAttggttaaatgaa	[+]	5.537	[+]	5.352	[+]	5.465	[+]	5.543	[+]	5.38	[+]	6.237	[+]	5.492	[+]	5.017	[~]	4.809	[~]	3.881	[+]	5.592	[+]	5.076	[+]	6.706	[+]	6.291	[+]	5.67	[~]	5.173	[~]	4.97	[~]
THC0290_T_0912	-1	1327680	11	1016	NA	0.937354	NA	0.983006	70	THC0290_1135	NA	Hypothetical protein	NA	aattaaaaacgaattattttaagagaaactaaaaAATAACATTTAAAAATATACTGCagtg	[+]	5.512	[~]	5.642	[+]	6.284	[+]	6.427	[+]	7.201	[+]	7.263	[+]	7.449	[+]	8.607	[+]	10.076	[+]	9.875	[+]	5.941	[+]	6.315	[+]	10.473	[+]	10.385	[+]	10.049	[+]	9.762	[+]	9.954	[+]
THC0290_T_0913	-1	1330669	3	892	SM1	0.990337	SigA	0.999334	24;454	THC0290_1138;THC0290_1137	NA;NA	Hypothetical protein;Probable transcriptional regulator, AraC family	NA;THC0290_v2_1202	ATTcccaaattaacaactgtactGTTTATAAATGTTTATATTTTTGTTaaattaaaatatt	[+]	5.3	[+]	5.397	[+]	6.166	[+]	6.165	[+]	6.581	[+]	7.192	[+]	6.975	[+]	7.846	[+]	6.979	[+]	8.065	[+]	6.026	[+]	6.111	[+]	9.237	[+]	9.286	[+]	7.422	[+]	7.517	[+]	9.594	[+]
THC0290_T_0914	-1	1337317	3	195	SM4	0.999667	Sig54	0.999667	NA	NA	NA	NA	NA	ACTAttctttttttagattttaaACGGTATAAATTTTGATGAAttgctttatcagatatat	[~]	4.14	[~]	4.481	[~]	4.626	[~]	4.373	[~]	4.456	[+]	6.19	[~]	4.259	[+]	5.613	[+]	5.015	[+]	6.799	[~]	4.521	[~]	4.249	[+]	7.555	[~]	4.242	[+]	5.434	[+]	5.384	[~]	4.946	[+]
THC0290_T_0915	1	1344790	3	906	NA	0.98867	NA	0.999	221	THC0290_1155	NA	Probable NADH dehydrogenase	THC0290_v2_1220	ctttcgatggattgtacagaacaagaattgaaaaACTAGAGGCTAAAAATACTGAATtaaa	[~]	7.345	[~]	7.488	[~]	7.253	[~]	7.291	[~]	6.805	[+]	6.676	[+]	6.463	[~]	5.252	[+]	7.728	[+]	7.027	[~]	7.519	[~]	7.437	[+]	8.757	[+]	9.131	[+]	8.408	[~]	7.856	[+]	10.176	[+]
THC0290_T_0916	1	1344901	6	907	NA	0.964678	NA	1	110	THC0290_1155	NA	Probable NADH dehydrogenase	THC0290_v2_1220	aaagcgatttcaaccgtgatatgaatgaaataggAAACAATATAAAAGATCTATTTAggta	[+]	8.082	[~]	7.544	[~]	7.111	[~]	7.509	[+]	7.904	[~]	6.644	[+]	7.572	[~]	5.163	[+]	8.861	[+]	7.897	[~]	7.584	[+]	7.897	[+]	10.618	[+]	11.248	[+]	9.971	[+]	8.81	[+]	11.318	[+]
THC0290_T_0917	1	1386917	5	1155	SM1	0.518827	SigA	0.999667	181	THC0290_1206	NA	Hypothetical protein	NA	TTTagcggttaaaatggctattaCTTTTGTTGTTGTTTTATTTTTGCtacttataaacgtt	[+]	8.182	[+]	8.296	[+]	7.84	[+]	8.513	[+]	8.594	[+]	8.29	[+]	8.648	[~]	9.384	[+]	10.271	[~]	9.611	[+]	8.156	[+]	8.149	[~]	9.454	[+]	11.278	[+]	10.447	[+]	9.528	[+]	12.248	[+]
THC0290_T_0918	-1	1390580	5	633	NA	0.609464	NA	0.702099	NA	NA	NA	NA	NA	gataaaacagttgtaaagttcttacgaaagatatATTTGTAAATTAAAGTAAATGTTgttc	[+]	7.75	[+]	7.553	[+]	7.986	[+]	8.126	[+]	8.396	[+]	8.724	[+]	8.837	[+]	8.062	[+]	9.662	[+]	9.66	[+]	8.194	[+]	7.992	[+]	10.19	[+]	10.079	[+]	9.583	[+]	9.26	[+]	10.707	[+]
THC0290_T_0919	1	1394090	69	1245	NA	0.362879	NA	0.878374	-6;70;146;222;297;373;449	THC0290_miscRNA_0009;THC0290_miscRNA_0010;THC0290_miscRNA_0011;THC0290_miscRNA_0012;THC0290_miscRNA_0013;THC0290_miscRNA_0014;THC0290_miscRNA_0015	NA;NA;NA;NA;NA;NA;NA	CRISPR spacer;CRISPR spacer;CRISPR spacer;CRISPR spacer;CRISPR spacer;CRISPR spacer;CRISPR spacer	NA;NA;NA;NA;NA;NA;NA	tgtgaattgctttcaaaattgtattttagcttatAATTACCAACGAGGCTACATttacata	[-]	12.253	[-]	12.286	[-]	13.138	[-]	13.229	[-]	13.483	[-]	13.912	[-]	13.073	[~]	14.478	[-]	13.036	[-]	12.997	[-]	13.205	[-]	13.242	[-]	13.046	[~]	12.809	[-]	12.485	[-]	12.627	[-]	12.734	[-]
THC0290_T_0920	1	1394410	12	577	NA	0.589137	NA	0.929357	-23;53;129;205;281;357;433	THC0290_miscRNA_0013;THC0290_miscRNA_0014;THC0290_miscRNA_0015;THC0290_miscRNA_0016;THC0290_miscRNA_0017;THC0290_miscRNA_0018;THC0290_miscRNA_0019	NA;NA;NA;NA;NA;NA;NA	CRISPR spacer;CRISPR spacer;CRISPR spacer;CRISPR spacer;CRISPR spacer;CRISPR spacer;CRISPR spacer	NA;NA;NA;NA;NA;NA;NA	attgtattttagcttataattaccaactttcaagtaGGCTTCTATCGATAGCCCTGtgttg	[~]	13.176	[~]	13.276	[~]	14.106	[~]	14.076	[~]	14.332	[~]	14.455	[~]	14.021	[~]	14.971	[~]	14.03	[~]	13.795	[~]	14.121	[~]	14.209	[~]	13.827	[~]	13.452	[~]	13.186	[~]	13.49	[~]	13.317	[~]
THC0290_T_0927	-1	1402524	8	934	SM1	0.987004	SigA	1	4;48	THC0290_N_0796;THC0290_1214	NA;NA	new transcription segment;Probable CRISPR-associated (Cas) protein. csn1 family, subtype Nmeni	NA;THC0290_v2_1290	TATataataaaaatgtatctaaaTAATATTAATTATCTTACATTTATAgttaaaaataaat	[+]	9.502	[+]	9.572	[+]	10.606	[+]	10.485	[+]	10.218	[+]	10.102	[+]	9.87	[+]	9.9	[+]	9.752	[+]	10.169	[+]	10.651	[+]	10.95	[+]	10.977	[+]	11.525	[+]	10.331	[+]	10.192	[+]	12.12	[+]
THC0290_T_0928	1	1402601	1923	620	SM2	0.808397	SigA	0.998334	1;119;217	THC0290_N_0797;THC0290_flavo-1_0063;THC0290_miscRNA_0044	NA;NA;NA	new transcription segment;Flavo-1 RNA;Bacterial Rnase P class A	NA;NA;NA	atttagatacattttTATtatatataaaaaAAAAGTTGTAGTATTGTACTACAATtttgaa	[+]	7.251	[+]	7.269	[+]	7.831	[+]	7.682	[+]	8.476	[+]	10.703	[+]	9.209	[+]	8.605	[+]	9.847	[+]	11.201	[+]	8.177	[+]	8.22	[+]	9.811	[+]	8.383	[+]	8.113	[+]	7.877	[+]	9.212	[+]
THC0290_T_0929	1	1402821	2849	1148	SM2	0.894035	SigA	0.999667	-3	THC0290_miscRNA_0044	NA	Bacterial Rnase P class A	NA	agattgcaacggatagcgggattggctcctAAAAAAACTACTTTTGCAGCGCAGAccgcct	[+]	14.721	[+]	14.745	[+]	15.601	[+]	15.591	[+]	16.069	[+]	15.856	[+]	15.782	[+]	15.277	[+]	16.331	[+]	16.177	[+]	15.195	[+]	15.271	[+]	16.313	[+]	16.567	[+]	16.752	[+]	16.708	[+]	16.815	[+]
THC0290_T_0930	-1	1403987	3	1771	SM2	0.993002	SigA	1	161	THC0290_1215	NA	Two-component system response regulatory protein	THC0290_v2_1291	tctaagtttataaaCTTGtggggaaatattAAAAGTAGGATATTTGTCGTTTAAAaataga	[~]	8.152	[~]	8.282	[~]	8.339	[~]	8.213	[~]	8.317	[~]	7.729	[-]	8.287	[+]	7.778	[-]	9.321	[~]	9.263	[~]	7.748	[~]	8.156	[~]	9.77	[-]	9.93	[-]	9.821	[-]	9.178	[-]	10.571	[-]
THC0290_T_0931	-1	1413501	4	381	NA	0.332889	NA	0.67944	NA	NA	NA	NA	NA	aaatatgggaacaagcatacaaaacaccagaaaaaaaaCGTTTCTATTACAgatacaaatt	[~]	13.204	[~]	13.321	[~]	13.885	[~]	13.679	[~]	13.88	[~]	13.725	[~]	13.706	[~]	13.586	[~]	11.293	[~]	12.773	[~]	13.525	[~]	13.675	[~]	12.682	[~]	12.272	[~]	12.91	[~]	13.031	[~]	12.824	[~]
THC0290_T_0932	-1	1415449	4	948	SM1	0.981006	SigA	1	14	THC0290_1219	NA	Peptidase, M48 family	THC0290_v2_1298	ATTttaattataaagttgtgtaaCCCTAATTTTTAAAATATATTTGTAgattaaaatttaa	[+]	10.089	[+]	10.096	[+]	10.419	[+]	10.083	[+]	10.597	[+]	11.05	[+]	10.893	[+]	12.045	[+]	11.152	[+]	12.088	[+]	10.11	[+]	10.448	[+]	12.251	[+]	12.366	[+]	11.454	[+]	11.595	[+]	13.197	[+]
THC0290_T_0933	1	1416389	16	1482	SM1	0.762413	SigA	0.989004	18	THC0290_1222	uvrB	Excinuclease ABC, B subunit	THC0290_v2_1301	ATGAatcttaaaattttagaatttAGAATTCAATATTTGTAACTTTGAAgctttgcaactc	[+]	9.44	[+]	9.404	[+]	10.076	[+]	9.929	[+]	9.95	[+]	10.63	[+]	10.494	[+]	9.092	[+]	9.408	[+]	9.815	[+]	10.071	[+]	10.027	[+]	9.953	[+]	9.628	[+]	9.337	[+]	9.085	[+]	9.275	[+]
THC0290_T_0934	-1	1418976	7	683	SM1	0.997001	SigA	0.999667	180	THC0290_1223	NA	Protein of unknown function	NA	ACAatagtttttattaaaaaaaaTCATCCTGAATTATCTACTTTTGTTttaaatacagacc	[~]	10.088	[~]	10.075	[~]	10.691	[~]	10.751	[~]	11.223	[~]	11.141	[~]	11.589	[~]	13.174	[~]	11.98	[~]	11.773	[~]	10.856	[~]	10.955	[~]	11.574	[~]	11.749	[~]	11.487	[~]	11.662	[~]	10.831	[~]
THC0290_T_0935	-1	1419537	4	1095	SM1	0.906365	SigA	0.985005	25	THC0290_1224	NA	Protein of unknown function	NA	aAAGAGAagaaaaggattttttgaattTGTTTATATTTATATTACTTTTATAaaaaaaata	[+]	9.393	[+]	9.706	[+]	9.968	[+]	9.998	[+]	10.433	[+]	10.976	[+]	10.456	[+]	11.984	[+]	10.963	[+]	11.895	[+]	9.89	[+]	10.105	[+]	12.859	[+]	12.854	[+]	11.454	[+]	11.246	[+]	12.812	[+]
THC0290_T_0936	1	1419628	45	878	SM1	0.999	SigA	1	15;429	THC0290_1225;THC0290_N_0802	NA;NA	Protein of unknown function;new transcription segment	THC0290_v2_1304;NA	TCTtctctttacatttgaatttaGTCCAATTTAATAATTATCTTTGAAaaataaatatata	[+]	10.804	[+]	10.862	[+]	11.03	[+]	11.068	[+]	11.545	[+]	11.784	[+]	11.523	[+]	12.628	[+]	12.238	[+]	12.274	[+]	11.124	[+]	11.24	[+]	12.534	[+]	12.418	[+]	11.912	[+]	12.119	[+]	12.208	[+]
THC0290_T_0937	1	1419640	27	879	SM1	0.990003	SigA	0.991336	3;417;493	THC0290_1225;THC0290_N_0802;THC0290_N_0803	NA;NA;NA	Protein of unknown function;new transcription segment;new transcription segment	THC0290_v2_1304;NA;NA	atttgaatttaGTCCAATTTAATAATTATCTTTGAAaaataaatatatagaacatgacaaa	[+]	10.795	[+]	10.851	[+]	10.974	[+]	11.026	[+]	11.517	[+]	11.783	[+]	11.476	[+]	12.623	[+]	12.229	[+]	12.255	[+]	11.121	[+]	11.236	[+]	12.141	[+]	12.412	[+]	11.896	[+]	12.095	[+]	12.075	[+]
THC0290_T_0938	-1	1420509	11	651	SM3	0.538487	SigA	0.977008	21	THC0290_1226	NA	Hypothetical protein precursor	NA	agcaattaacaaacaCTattttagcagaaTTTCTTTCTTAATTTTGACctgtaatcttaaa	[~]	7.411	[~]	7.5	[+]	7.387	[+]	7.359	[+]	7.72	[+]	8.211	[+]	8.29	[+]	8.469	[+]	9.651	[+]	9.626	[+]	6.999	[+]	7.526	[+]	10.851	[+]	11.083	[+]	9.992	[+]	9.626	[+]	10.548	[+]
THC0290_T_0939	-1	1421551	9	155	NA	0.725758	NA	0.998001	NA	NA	NA	NA	NA	acagaaggaggaatggatatcgaagaagttgctgCACACACACCACATTTAATACACAatg	[~]	13.743	[~]	13.698	[~]	13.659	[~]	13.838	[~]	13.294	[~]	12.91	[~]	12.844	[~]	13.309	[~]	13.122	[~]	12.632	[~]	13.666	[~]	13.681	[~]	11.935	[~]	12.242	[~]	12.49	[~]	12.614	[~]	11.835	[~]
THC0290_T_0940	-1	1422043	58	1756	SM1	0.712096	SigA	1	37	THC0290_1227	sucC	Succinyl-CoA synthetase, beta subunit	THC0290_v2_1306	AAAaaacaaaatcagttagaataTTAGTTCTAATTTATTATTTTTGTGctcccgaagggtc	[+]	14.212	[+]	14.253	[+]	14.224	[+]	14.237	[+]	13.862	[+]	13.916	[+]	13.337	[+]	13.539	[+]	13.778	[+]	13.996	[+]	14.204	[+]	14.272	[+]	13.635	[+]	13.253	[+]	13.096	[+]	13.354	[+]	13.401	[+]
THC0290_T_0941	-1	1423101	4	1573	SM1	0.495168	SigA	0.98967	14	THC0290_1228	NA	Probable lipoprotein precursor	NA	taaatcctcattttgtactacaatttgagGATTTTTTTATTATTTTGCaataaattaaaaa	[+]	10.593	[+]	10.586	[+]	10.612	[+]	10.449	[+]	10.448	[+]	11.217	[+]	10.488	[+]	10.651	[+]	10.118	[+]	11.102	[+]	10.793	[+]	10.756	[+]	11.014	[+]	11.049	[+]	9.876	[+]	9.837	[+]	11.316	[+]
THC0290_T_0942	-1	1426320	3	752	SM1	0.99067	SigA	1	16;298	THC0290_1232;THC0290_1231	NA;NA	Protein of unknown function;Probable transmembrane protein of unknown function	THC0290_v2_1311;NA	TTTtatattaataatattaatttAAAACTAATTTTATTTAACTTTGTGtaatatataataa	[+]	7.067	[+]	7.331	[+]	7.236	[+]	7.214	[+]	7.316	[+]	8.018	[+]	7.578	[+]	7.553	[+]	7.727	[+]	8.955	[+]	7.166	[+]	7.208	[+]	10.551	[+]	9.39	[+]	8.639	[+]	8.571	[+]	10.606	[+]
THC0290_T_0943	1	1426650	15	1353	SM1	0.936688	SigA	0.999	30	THC0290_1233	NA	Probable peroxiredoxin	THC0290_v2_1312	ACGtgataaatatcacaaaatcaTACTTTTATATAACCTACATTTACTtcattaaaacaat	[+]	6.944	[+]	7.403	[+]	8.834	[+]	8.908	[+]	9.252	[+]	9.336	[+]	8.676	[+]	7.932	[+]	9.957	[+]	9.746	[+]	8.332	[+]	8.705	[+]	11.456	[+]	10.963	[+]	11.832	[+]	12.367	[+]	9.961	[+]
THC0290_T_0944	1	1427967	3	977	SM1	0.917694	SigA	0.998001	NA	NA	NA	NA	NA	TTactttattaaatttggaaaaATTTACTAGTATTAATAAATTTACGtttaaaaccatcgg	[~]	4.21	[~]	4.688	[~]	4.83	[~]	4.878	[~]	5.463	[~]	6.567	[~]	6.399	[~]	7.271	[~]	6.497	[+]	6.639	[~]	4.866	[~]	4.568	[~]	7.554	[+]	7.967	[~]	6.79	[~]	7.04	[+]	8.213	[+]
THC0290_T_0945	-1	1437887	9699	998	SM2	0.947351	SigA	1	0;85;127	THC0290_tRNA_0021;THC0290_N_0808;THC0290_N_0807	NA;NA;NA	transfer RNA-Tyr;new transcription segment;new transcription segment	NA;NA;NA	tttttgCTTGcaaaacaaaaaAAATGTATTATATTTGCACTGGCTAttaaggggagatact	[+]	10.094	[+]	10.174	[+]	11.086	[+]	11.484	[+]	11.872	[+]	14	[+]	12.502	[+]	15.446	[+]	13.755	[+]	15.751	[+]	11.074	[+]	10.462	[+]	16.109	[+]	15.221	[+]	13.922	[+]	12.936	[+]	15.516	[+]
THC0290_T_0946	1	1439775	14	513	SM2	0.606465	SigA	0.999667	3;384	THC0290_1248;THC0290_N_0813	NA;NA	Hypothetical protein;new transcription segment	NA;NA	tcttaactaagattaTTTTtttcttttttaAAATTCATTACTTTTGTTTCCAAATgagaat	[+]	9.797	[+]	9.736	[+]	9.937	[+]	10.024	[+]	10.54	[+]	10.823	[+]	10.566	[+]	12.161	[+]	10.981	[+]	11.194	[+]	10.128	[+]	9.886	[+]	11.603	[+]	11.802	[+]	10.654	[+]	10.537	[+]	11.171	[+]
THC0290_T_0947	1	1442644	3	909	SM4	0.5005	Sig54	0.5005	NA	NA	NA	NA	NA	cttttttgggataaatataaattTAGTAACACTATTTGCCCTTgtattagctattggtgtg	[~]	7.593	[~]	7.921	[~]	7.467	[~]	7.808	[~]	7.173	[~]	6.614	[~]	7.572	[~]	6.465	[~]	8.333	[~]	7.536	[~]	7.432	[~]	7.37	[~]	7.847	[+]	9.045	[~]	8.409	[~]	7.942	[+]	9.824	[+]
THC0290_T_0948	-1	1444724	3	1159	SM1	0.701433	SigA	1	0	THC0290_N_0814	NA	new transcription segment	NA	TAAAaaatgttttccaaggaatatTAGCTGTATTTATAGTATCTTTATttgcagtaatata	[+]	6.622	[+]	6.626	[+]	6.417	[+]	7.029	[+]	7.123	[+]	6.824	[+]	7.1	[+]	7.528	[+]	8.726	[+]	8.268	[+]	6.705	[+]	6.749	[+]	8.679	[+]	10.003	[+]	8.93	[+]	8.11	[+]	10.931	[+]
THC0290_T_0949	-1	1446560	3	398	NA	0.694768	NA	0.985671	336	THC0290_N_0815	NA	new transcription segment	NA	cgatgaatgcagaaattatcttgctacatgttttaTCTGCACCTGTTAATTATACTACTGt	[~]	10.328	[~]	10.754	[~]	12.098	[~]	12.207	[~]	13.315	[~]	13.382	[~]	13.494	[~]	14.351	[~]	14.642	[~]	14.352	[~]	11.586	[~]	12.085	[~]	14.635	[~]	15.239	[~]	14.539	[~]	14.54	[~]	15.865	[~]
THC0290_T_0950	-1	1446726	47	1101	SM1	0.920693	SigA	0.998334	22	THC0290_1252	NA	Universal stress protein, UspA family	THC0290_v2_1332	TTAAtctattgaaaattaacaaacAAACGATACATTTTGTAAATTTGTGtaacacattaat	[+]	9.722	[+]	10.027	[+]	11.261	[+]	11.361	[+]	12.584	[+]	12.897	[+]	12.68	[+]	13.483	[+]	13.96	[+]	14.054	[+]	10.864	[+]	11.251	[+]	14.478	[+]	14.498	[+]	13.831	[+]	14.082	[+]	15.533	[+]
THC0290_T_0951	-1	1448138	4	733	SM1	0.97001	SigA	0.999334	20	THC0290_1253	NA	Probable two-component system response regulatory protein - glycosyl transferase, group 2 family protein	THC0290_v2_1333	TAATAaacttaaaaaaataaaactgCTACGCATTTTTTTTTATATTTGTTaaaatcaaaac	[+]	8.47	[+]	8.688	[+]	9.627	[+]	9.356	[+]	9.5	[+]	9.422	[+]	9.24	[+]	9.99	[+]	9.069	[+]	9.491	[+]	9.51	[+]	9.902	[+]	10.667	[+]	10.918	[+]	9.741	[+]	9.67	[+]	11.433	[+]
THC0290_T_0952	1	1448206	4	1002	SM1	0.776741	SigA	1	20	THC0290_1254	NA	Probable transmembrane protein	NA	ATGcgtagcagttttatttttttAAGTTTATTATTATTTACTTTTACAacttcaatagtac	[+]	6.68	[+]	6.825	[+]	7.352	[+]	7.255	[+]	7.925	[+]	7.525	[+]	8.051	[+]	8.302	[+]	9.091	[+]	9.031	[+]	6.879	[+]	7.371	[+]	8.867	[+]	9.065	[+]	8.647	[+]	8.52	[+]	8.559	[+]
THC0290_T_0953	-1	1457434	3	32	NA	0.458181	NA	0.513829	NA	NA	NA	NA	NA	aataggctaaaattttttggtctatttttttatgTATTTTAGAcaattttataattctaat	[~]	4.451	[~]	4.508	[-]	4.778	[-]	4.311	[-]	4.379	[-]	5.259	[-]	4.184	[~]	5.035	[-]	5.937	[-]	6.823	[-]	4.887	[-]	4.632	[-]	8.487	[-]	7.96	[-]	6.6	[-]	6.306	[-]	6.885	[-]
THC0290_T_0954	1	1457740	23	824	SM1	0.972009	SigA	0.999667	1;272	THC0290_N_0817;THC0290_1260	NA;acsA	new transcription segment;Acetate--CoA ligase	NA;THC0290_v2_1343	TTTttcattttaataccattaatTATTGCAGGTTTTACTATTTTTGAAatgtacttattaa	[+]	8.86	[+]	9.01	[+]	9.619	[+]	9.333	[+]	9.344	[+]	9.904	[+]	8.714	[+]	10.25	[+]	9.683	[+]	10.191	[+]	10.13	[+]	10.076	[+]	10.57	[+]	9.864	[+]	9.467	[+]	9.997	[+]	9.86	[+]
THC0290_T_0955	1	1459560	14	295	NA	0.983006	NA	0.991669	360	THC0290_N_0818	NA	new transcription segment	NA	caggtcgggtagatgatGTAGTcattgtttctggaCATAATTTAGGAACAGCACCAATAGa	[~]	11.846	[~]	11.724	[-]	11.97	[~]	12.055	[~]	11.904	[~]	11.355	[~]	11.598	[~]	10.076	[-]	11.065	[~]	10.536	[~]	12.301	[~]	12.313	[-]	9.997	[-]	10.222	[~]	10.961	[~]	11.111	[-]	9.776	[-]
THC0290_T_0956	-1	1461509	6	342	NA	0.573142	NA	0.788071	NA	NA	NA	NA	NA	aaaatattcctttgcagcatatttttaatatttctggcgaaattacattagcaattattag	[~]	11.617	[~]	11.694	[~]	11.873	[+]	12.154	[~]	12.541	[~]	12.41	[~]	12.415	[~]	11.872	[~]	12.256	[~]	12.132	[~]	11.868	[+]	12.142	[~]	11.493	[~]	11.841	[~]	11.77	[~]	12.025	[+]	11.811	[+]
THC0290_T_0957	-1	1462554	15	501	SM2	0.819394	SigA	0.992336	19	THC0290_1262	NA	Protein of unknown function	THC0290_v2_1345	atgtttcaaattatcTTTCtatcttctaaaAAATATTATAAATTTACAACATAGTaatctt	[+]	10.353	[+]	10.35	[+]	10.711	[+]	10.751	[+]	11.318	[+]	11.446	[+]	11.004	[+]	11.636	[+]	11.485	[+]	11.456	[+]	10.814	[+]	10.952	[+]	11.457	[+]	11.327	[+]	11.229	[+]	11.173	[+]	12.039	[+]
THC0290_T_0958	1	1465008	4	1164	SM2	0.565478	SigA	0.996001	NA	NA	NA	NA	NA	tcgtctgaagattttATTGtataatcgccaTTTATTCCTACTTTTAAACTAGATAatccta	[~]	4.974	[~]	4.606	[+]	5.365	[+]	5.872	[+]	6.164	[+]	7.154	[+]	6.756	[~]	9.599	[+]	7.135	[+]	8.132	[+]	5.931	[+]	5.773	[+]	9.007	[+]	7.426	[+]	6.077	[+]	6.406	[+]	6.576	[+]
THC0290_T_0959	-1	1465658	33	1328	SM1	0.976341	SigA	0.996668	18	THC0290_1264	NA	Putative DNA or RNA helicase	THC0290_v2_1347	cATTTTTttcttaaaatgaccaaattACCCTTTTTATGCCGTACTTTTGCCaaaattacaa	[+]	10.623	[+]	10.486	[+]	9.596	[~]	9.26	[+]	9.345	[~]	9.248	[+]	9.733	[+]	10.777	[+]	10.63	[+]	10.784	[~]	9.538	[~]	9.415	[+]	10.222	[+]	10.105	[+]	9.774	[+]	9.996	[~]	8.377	[+]
THC0290_T_0960	-1	1466242	23	1521	SM1	0.764745	SigA	0.987671	13	THC0290_1265	NA	Protein of unknown function	NA	ATcatcgataatatatctatcaAAACCCAAAGTAATTTATATTTGCAtttataaattattt	[+]	8.721	[+]	8.89	[+]	8.796	[+]	8.84	[+]	8.747	[+]	9.486	[+]	8.145	[+]	8.807	[+]	8.559	[+]	9.546	[+]	8.876	[+]	8.874	[+]	9.496	[+]	9.363	[+]	8.01	[+]	8.587	[+]	8.719	[+]
THC0290_T_0961	1	1466311	9	612	SM1	0.691103	SigA	1	23;294	THC0290_1266;THC0290_1267	ydzA;mscS2	Protein YdzA of unknown function;Probable small-conductance mechanosensitive ion channel MscS2	NA;THC0290_v2_1350	CTTtgggttttgatagatatattATCGATGATAATTCTTAATTTTGCAcacaaattaattt	[+]	9.44	[+]	9.364	[+]	9.591	[+]	9.669	[+]	9.963	[+]	10.676	[+]	10.288	[+]	10.572	[+]	10.792	[+]	11.708	[+]	9.373	[+]	9.419	[+]	11.161	[+]	10.494	[+]	10.467	[+]	10.519	[+]	10.124	[+]
THC0290_T_0962	-1	1468037	6	1254	NA	0.935688	NA	0.999334	26	THC0290_N_0821	NA	new transcription segment	NA	aagtttaggtgaagaaggaaaaccaaaagcacacGGAAAGACTGAAATTGAATTTGTGAga	[-]	8.66	[-]	8.609	[-]	9.462	[-]	9.516	[-]	10.554	[-]	10.254	[-]	10.298	[-]	11.97	[-]	11.235	[-]	10.809	[-]	9.126	[-]	9.34	[-]	10.893	[-]	11.316	[-]	10.836	[-]	10.753	[-]	10.543	[-]
THC0290_T_0963	-1	1468398	16	82	NA	0.923692	NA	0.999	0;387	THC0290_1268;THC0290_N_0821	NA;NA	Acyl-CoA hydrolase family protein;new transcription segment	THC0290_v2_1351;NA	gcgtttgatcatCAagaaattatagaaaaagcttTAAAAACATTTAAAATATGAGATttca	[+]	11.215	[+]	11.357	[+]	11.911	[+]	11.964	[+]	12.418	[+]	12.505	[+]	12.361	[~]	13.155	[~]	13.482	[~]	13.172	[+]	11.629	[+]	11.764	[~]	13.248	[~]	13.418	[~]	12.993	[~]	13.076	[~]	14.352	[~]
THC0290_T_0964	-1	1468634	8	1436	NA	0.988337	NA	1	236	THC0290_1268	NA	Acyl-CoA hydrolase family protein	THC0290_v2_1351	ttgtagatGAaaatgaagatttagaaGTCGCAGCAAAACGAGAATTAGAGGaagaaacgca	[~]	9.373	[~]	9.597	[~]	10.043	[~]	9.952	[~]	10.462	[-]	10.36	[~]	10.824	[~]	11.705	[~]	12.086	[~]	11.699	[~]	9.727	[~]	9.952	[~]	12.112	[~]	12.495	[~]	11.826	[~]	11.637	[~]	13.252	[~]
THC0290_T_0965	-1	1468823	56	1080	SM1	0.922026	SigA	0.999334	12;425	THC0290_1269;THC0290_1268	NA;NA	MutT/nudix family protein;Acyl-CoA hydrolase family protein	THC0290_v2_1352;THC0290_v2_1351	TTAcagtaatattaaggttgaaaTATAAAAGTTATTAGTAATTTAGTGttgaaaagataat	[+]	9.749	[+]	9.587	[+]	10.217	[+]	10.023	[+]	10.376	[+]	11.805	[+]	10.815	[+]	11.807	[+]	11.346	[+]	12.374	[+]	10.233	[+]	10.37	[+]	12.86	[+]	11.801	[+]	11.392	[+]	11.68	[+]	12.353	[+]
THC0290_T_0966	-1	1476725	4	574	SM1	0.893036	SigA	0.999667	1;183	THC0290_N_0824;THC0290_1278	NA;hisG	new transcription segment;ATP phosphoribosyltransferase	NA;THC0290_v2_1361	TTAtaaaaaataatttggtttctATTTTTATTTGAACATATATTTGCAaggtataaaaaaa	[-]	6.505	[-]	6.953	[-]	7.257	[-]	7.509	[-]	6.885	[~]	6.438	[-]	4.886	[-]	7.232	[-]	6.251	[~]	6.957	[-]	7.226	[-]	7.527	[~]	8.61	[~]	7.316	[~]	6.895	[~]	6.804	[-]	7.622	[+]
THC0290_T_0967	-1	1477294	20	138	SM1	0.993002	SigA	0.999667	17;461	THC0290_1279;THC0290_N_0825	NA;NA	Probable transmembrane protein of unknown function;new transcription segment	NA;NA	TAAaagcttttttataataattaAAATAAATTAATGAATATATTTGGAataactaaaatag	[+]	8.275	[+]	8.552	[+]	9.134	[+]	8.999	[+]	8.479	[+]	8.041	[+]	7.726	[+]	8.302	[+]	8.167	[+]	7.809	[+]	8.862	[+]	9.099	[+]	8.906	[+]	8.792	[+]	7.884	[+]	7.97	[+]	9.863	[+]
THC0290_T_0968	1	1478477	3	657	SM5	0.745751	ND	0.745751	NA	NA	NA	NA	NA	tttttagatagtttagccacaaaaagtttattatTTACTAATTTGTATgcagttggaaaca	[~]	10.243	[~]	10.35	[~]	10.025	[~]	10.482	[~]	10.333	[~]	9.935	[+]	9.857	[~]	9.976	[+]	10.357	[+]	9.912	[~]	10.017	[~]	10.123	[+]	10.243	[+]	11.332	[+]	10.406	[+]	10.197	[+]	12.219	[+]
THC0290_T_0969	-1	1483190	4	286	NA	0.635455	NA	0.984672	330	THC0290_N_0828	NA	new transcription segment	NA	ctaaagctattcaaaaaacattcttaaaacaacGTTCAGGCTCAATTATAAATATGAGtag	[~]	12.67	[~]	12.762	[~]	12.892	[~]	12.952	[~]	12.642	[~]	12	[~]	11.839	[~]	12.095	[~]	11.552	[~]	11.028	[~]	13	[~]	13.006	[~]	11.802	[~]	12.309	[~]	11.681	[~]	11.698	[~]	11.847	[~]
THC0290_T_0970	-1	1483630	33	1754	SM1	0.5015	SigA	0.997334	23	THC0290_1283	NA	3-oxoacyl-[acyl-carrier-protein] reductase	THC0290_v2_1367	AtttaaaaatgtattttttttaAAAAAGTATTTATCCTATATTTGAcaattaaagaataaa	[+]	12.519	[+]	12.605	[+]	12.686	[+]	12.788	[+]	12.36	[+]	12.024	[+]	11.537	[+]	11.359	[+]	11.032	[+]	11.106	[+]	12.884	[+]	12.929	[+]	11.79	[+]	12.5	[+]	11.463	[+]	11.403	[+]	12.858	[+]
THC0290_T_0971	1	1484097	46	505	SM1	0.812063	SigA	1	12	THC0290_1284	NA	Probable DNA polymerase III subunit	THC0290_v2_1368	TTtcacttttcacttttgcattTTCACTTATTACCATTATATTTGCTttcgaatatttttt	[+]	12.253	[+]	12.323	[+]	12.541	[+]	12.338	[+]	12.462	[+]	12.8	[+]	12.547	[+]	10.576	[+]	12.662	[+]	13.049	[+]	12.479	[+]	12.524	[+]	13.015	[+]	12.641	[+]	12.351	[+]	12.203	[+]	12.711	[+]
THC0290_T_0972	1	1484620	6	243	NA	0.73109	NA	0.998667	NA	NA	NA	NA	NA	gatattatctcgttgtcagatattcgatttcaaaAGAATTACTGTAAAAGATGCCAAGGaa	[~]	11.917	[~]	11.825	[~]	11.961	[~]	12.015	[~]	12.27	[~]	12.428	[~]	12.338	[~]	12.296	[~]	12.935	[~]	12.575	[~]	11.851	[~]	11.82	[~]	11.913	[~]	11.734	[~]	11.814	[~]	11.743	[~]	11.079	[~]
THC0290_T_0973	-1	1486813	4	47	NA	0.877041	NA	0.996335	NA	NA	NA	NA	NA	tttaattcgtgtacctattcgtttgggacaagacGCATTTACCGTTGGAGAAATTACCGaa	[~]	10.897	[~]	10.864	[~]	10.984	[~]	10.923	[~]	11.067	[~]	10.915	[~]	11.414	[~]	11.878	[~]	10.761	[~]	10.898	[~]	11.078	[~]	11.358	[~]	10.36	[~]	10.449	[~]	10.688	[~]	11.102	[~]	10.01	[~]
THC0290_T_0974	-1	1487802	3	3	NA	0.786405	NA	0.986005	NA	NA	NA	NA	NA	accgaaggcatcgaacttatctttggagtaaaaggACTAAAAGTACACAGTAAAGTTTgcc	[~]	11.006	[~]	11.104	[~]	11.165	[~]	11.114	[~]	11.462	[~]	11.673	[~]	11.71	[~]	11.665	[~]	11.799	[~]	12.116	[~]	11.351	[~]	11.31	[~]	11.177	[~]	11.076	[~]	11.27	[~]	11.316	[~]	10.646	[~]
THC0290_T_0975	-1	1492002	202	1663	SM1	0.687104	SigA	1	30	THC0290_1292	sucD	Succinyl-CoA synthetase, alpha subunit	THC0290_v2_1376	ATTttaataaaattattaaaaagTATATTTCAAAACATTACTTTTGTAacacaataaaaaa	[+]	13.749	[+]	13.813	[+]	13.789	[+]	13.852	[+]	13.779	[+]	13.461	[+]	13.287	[+]	11.507	[+]	13.506	[+]	13.251	[+]	13.819	[+]	13.88	[+]	12.796	[+]	12.906	[+]	12.718	[+]	12.781	[+]	13.084	[+]
THC0290_T_0976	-1	1494797	3	216	NA	0.483172	NA	0.549484	-27;27	THC0290_N_0838;THC0290_1296	NA;lpxA	new transcription segment;Acyl-[acyl-carrier-protein]--UDP-N-acetylglucosamine O-acyltransferase	NA;THC0290_v2_1380	cgcaaattgccaaaaaacaataactttttcttaaTTTGATCAAATCAATTAAACAACAGaa	[~]	12.724	[~]	12.74	[~]	12.341	[~]	12.325	[~]	11.703	[~]	11.218	[~]	11.339	[+]	9.749	[~]	10.196	[~]	10.017	[~]	12.261	[~]	12.316	[~]	9.181	[~]	8.89	[~]	9.775	[~]	10.097	[~]	9.468	[~]
THC0290_T_0977	-1	1495222	3	316	SM5	0.488171	ND	-1	398;452	THC0290_N_0838;THC0290_1296	NA;lpxA	new transcription segment;Acyl-[acyl-carrier-protein]--UDP-N-acetylglucosamine O-acyltransferase	NA;THC0290_v2_1380	aaacaaagaaccattgatggatattcacaaaaTTATGAGTATTTTGCCacaccgtccgcca	[~]	12.67	[~]	12.568	[~]	11.981	[~]	12.037	[~]	11.517	[~]	11.423	[~]	11.262	[~]	9.159	[~]	10.45	[~]	10.179	[~]	12.141	[~]	12.14	[~]	9.749	[~]	9.421	[~]	9.926	[~]	10.208	[~]	10.064	[~]
THC0290_T_0978	-1	1497325	3	1507	SM1	0.769077	SigA	0.998334	1;90	THC0290_N_0839;THC0290_1298	NA;lpxD	new transcription segment;UDP-3-O-[3-hydroxymyristoyl] glucosamine N-acyltransferase	NA;THC0290_v2_1382	CAActcaataaaaactaaagattCTTTTTAAATTTTTATATTTTTGTCgtcgtaaaattaa	[~]	9.127	[~]	9.091	[-]	8.854	[~]	8.793	[-]	8.728	[-]	8.764	[-]	8.031	[-]	8.79	[~]	8.088	[-]	8.358	[-]	8.805	[~]	9.275	[-]	7.58	[~]	8.048	[~]	8.246	[~]	8.474	[~]	8.283	[~]
THC0290_T_0979	1	1497414	5	1090	SM5	0.938354	ND	0.938354	1	THC0290_N_0840	NA	new transcription segment	NA	tttattgagttgttttggaaaacaaagaaaatatTTTGTAACTTGTTTAGataatgctttt	[+]	6.499	[+]	5.968	[+]	6.53	[+]	6.328	[+]	6.752	[+]	8.249	[+]	7.57	[+]	10.156	[+]	8.204	[+]	9.488	[+]	6.857	[+]	6.471	[+]	11.611	[+]	9.823	[+]	8.638	[+]	8.125	[+]	10.051	[+]
THC0290_T_0980	1	1500230	10	1156	SM3	0.730423	SigA	0.990337	1;44	THC0290_N_0843;THC0290_flavo-1_0067	NA;NA	new transcription segment;Flavo-1 RNA	NA;NA	ttctgagtgacaaaggtTTttatattttttgaATTGTTTTTATTTTTACacaaattaaata	[+]	7.322	[+]	7.559	[+]	7.569	[+]	7.962	[+]	7.903	[+]	8.059	[+]	8.046	[~]	5.154	[+]	9.562	[+]	9.368	[+]	7.372	[+]	7.446	[+]	9.543	[+]	10.937	[+]	9.956	[+]	8.838	[+]	11.251	[+]
THC0290_T_0981	1	1505991	3	1571	SM1	0.689104	SigA	0.996001	20	THC0290_1305	NA	Protein of unknown function	NA	CATTattgtactaaattaaggataATCATAAAAAAATTGTAGATTTGCTttttaatgattt	[+]	9.946	[+]	9.835	[+]	9.458	[+]	9.281	[+]	9.549	[+]	9.881	[+]	9.586	[+]	10.303	[+]	9.28	[+]	9.722	[+]	9.514	[+]	9.564	[+]	9.812	[+]	9.61	[+]	9.302	[+]	9.464	[+]	9.621	[+]
THC0290_T_0982	-1	1506398	8	1054	SM1	0.847051	SigA	1	1	THC0290_N_0844	NA	new transcription segment	NA	GTAAttaaaagttccaaaacggtcTATTAGAAAATTATTTATATTTACAtacggaatatat	[~]	5.02	[~]	4.881	[~]	5.462	[~]	5.23	[~]	6.096	[+]	7.698	[~]	6.002	[~]	7.527	[+]	7.177	[+]	8.541	[~]	5.543	[~]	5.588	[+]	8.347	[+]	7.967	[~]	6.849	[+]	6.433	[+]	9.188	[+]
THC0290_T_0983	1	1510781	61	643	SM1	0.947684	SigA	0.999667	1	THC0290_1309	NA	Fragment of two-component system sensor histidine kinase (part 1)	NA	ATGctaggttaatgtcttttttaTTGAATAAAATCGATTATTTTTGAAgtgatgaagaaga	[+]	9.088	[+]	9.147	[+]	10.333	[+]	10.392	[+]	11.665	[+]	12.134	[+]	12.247	[+]	13.238	[+]	13.127	[+]	13.069	[+]	10.03	[+]	9.861	[+]	13.905	[+]	13.518	[+]	13.074	[+]	13.143	[+]	13.316	[+]
THC0290_T_0984	1	1511222	25	553	NA	0.398201	NA	0.962346	NA	NA	NA	NA	NA	aaggcagctgataccatttttgctgaaaaaccaaTCATTGGAAATAAACTATATGGTgatt	[~]	9.387	[~]	9.525	[~]	10.257	[~]	11.166	[~]	11.385	[~]	11.699	[~]	11.773	[~]	12.869	[~]	12.935	[~]	12.552	[~]	10.437	[~]	9.948	[~]	12.64	[~]	12.489	[~]	12.837	[~]	12.41	[~]	11.917	[~]
THC0290_T_0985	1	1513989	3	1024	SM1	0.998334	SigA	1	NA	NA	NA	NA	NA	ATAttgtcttcaatggctaatttCTCTAAGTTTTTAACTACTTTTGTAatggtattcgtgt	[+]	7.198	[+]	6.957	[~]	7.859	[~]	7.783	[~]	8.736	[+]	9.401	[~]	9.417	[+]	11.108	[+]	10.421	[+]	11.055	[~]	7.521	[~]	7.613	[+]	11.727	[+]	11.157	[~]	10.477	[~]	10.318	[+]	11.277	[+]
THC0290_T_0986	-1	1514064	4	1560	SM2	0.592469	SigA	0.999	16	THC0290_1312	NA	Protein of unknown function	NA	agcataatcattattcaTTTtgtagctataaaAACATCATTATATTTGCACTTTAAGgtac	[+]	9.311	[+]	9.4	[+]	8.765	[+]	8.547	[+]	8.385	[+]	8.967	[+]	8.46	[~]	9.412	[+]	9.6	[+]	9.982	[+]	9.037	[+]	8.944	[+]	10.874	[~]	10.863	[~]	9.969	[~]	9.975	[+]	11.087	[+]
THC0290_T_0987	-1	1524004	11	1821	SM2	0.901699	SigA	1	21	THC0290_1321	NA	Protein of unknown function	THC0290_v2_1405	ttttttaaaaaattaATGtttacttaacatTACATTATTACATTTGCACCCTAATaaataa	[+]	11.748	[+]	11.826	[+]	11.104	[+]	11.174	[+]	10.099	[+]	10.322	[+]	9.557	[+]	10.15	[+]	9.888	[+]	10.821	[+]	11.069	[+]	10.958	[+]	9.779	[+]	9.311	[+]	9.153	[+]	9.761	[+]	8.379	[+]
THC0290_T_0988	1	1524117	34	1551	SM1	0.893702	SigA	0.998667	37	THC0290_1322	NA	Carboxyltransferase	THC0290_v2_1406	TAAaataaattgattgattaaaaTCACAATTGATTTTGTATTTTAGCCacataaaaattat	[+]	10.679	[+]	10.85	[+]	10.867	[+]	10.785	[+]	10.358	[+]	10.56	[+]	9.628	[+]	8.762	[+]	10.137	[+]	10.429	[+]	11.129	[+]	11.164	[+]	10.755	[+]	10.271	[+]	9.607	[+]	9.729	[+]	11.036	[+]
THC0290_T_0989	1	1524158	4	1552	NA	0.597801	NA	0.964678	-4	THC0290_1322	NA	Carboxyltransferase	THC0290_v2_1406	tttagccacataaaaattattagtatttaaacttATACGCTATAAAATGGACATTAActtc	[+]	10.839	[+]	10.979	[+]	10.991	[+]	10.921	[+]	10.481	[+]	10.832	[+]	9.835	[+]	9.008	[+]	10.272	[+]	10.647	[+]	11.283	[+]	11.265	[+]	11.081	[+]	10.458	[+]	9.694	[+]	9.729	[+]	11.226	[+]
THC0290_T_0990	1	1533121	9	408	SM1	0.646784	SigA	0.98867	13	THC0290_1329	NA	Protein of unknown function	THC0290_v2_1413	TAAaacccaaaaatacaaagtaaTTTCTGACTTTTTAGTAAGTTTACActcaaataaaaaa	[+]	8.711	[+]	8.716	[+]	8.926	[+]	8.853	[+]	8.749	[+]	9.164	[+]	8.517	[+]	8.34	[+]	9.445	[+]	9.558	[+]	8.836	[+]	8.899	[+]	8.538	[+]	9.497	[+]	8.39	[+]	8.286	[+]	10.637	[+]
THC0290_T_0991	1	1533936	10	1775	SM1	0.934688	SigA	0.999667	13	THC0290_1330	recG	ATP-dependent DNA helicase RecG	THC0290_v2_1414	TTTgccacaaattttgacagattAAAATAAATAAAATTTATCTTCGCAttattgaaattga	[+]	10.328	[+]	10.375	[+]	10.367	[+]	10.216	[+]	9.968	[+]	9.997	[+]	9.802	[+]	9.684	[+]	10.22	[+]	10.21	[+]	10.285	[+]	10.243	[+]	9.338	[+]	8.811	[+]	8.728	[+]	8.808	[~]	9.056	[+]
THC0290_T_0992	-1	1536252	4	829	NA	0.643785	NA	0.91003	140	THC0290_N_0848	NA	new transcription segment	NA	agcatacgatttgaatgacaaaaaaccatattggTACACACGTTTAAAATCTCAAATacaa	[~]	11.238	[~]	11.375	[~]	11.793	[~]	11.713	[~]	11.944	[~]	12.488	[~]	11.875	[~]	13.308	[~]	11.654	[+]	12.356	[~]	11.623	[~]	11.691	[+]	13.784	[~]	13.115	[~]	13.126	[~]	13.297	[~]	12.753	[+]
THC0290_T_0993	-1	1536975	7	854	SM1	0.999667	SigA	0.999667	17	THC0290_1331	NA	Protein of unknown function precursor	THC0290_v2_1415	TTTAtctttttgttaacacttgatTTGTATTTGATGCTTTATCTTTGAAtaaataaaattt	[+]	11.45	[+]	11.498	[+]	11.917	[+]	11.874	[+]	12.007	[+]	11.57	[+]	11.692	[+]	12.414	[+]	10.866	[+]	11.006	[+]	11.444	[+]	11.816	[+]	13.156	[+]	13.322	[+]	12.779	[+]	12.893	[+]	14.399	[+]
THC0290_T_0994	1	1540409	3	416	SM3	0.715095	SigA	0.974342	488	THC0290_1337	NA	Two-component system sensor histidine kinase	THC0290_v2_1421	ggaatagtaaacaagGCtatagaagatttAGTAATTGCTAACTTTGGtgaagcaaaatgga	[~]	8.6	[-]	8.71	[-]	8.61	[~]	8.546	[-]	8.116	[-]	8.238	[-]	7.945	[-]	7.094	[-]	8.318	[-]	8.161	[-]	8.226	[-]	8.407	[-]	9.238	[-]	9.375	[-]	9.671	[-]	9.738	[-]	9.638	[-]
THC0290_T_0995	1	1540656	6	1027	SM1	0.726091	SigA	0.997667	241	THC0290_1337	NA	Two-component system sensor histidine kinase	THC0290_v2_1421	TCATgaactccggaggcaacaattTAAGAGATTTTTTAGTAAATTTACCtaactttcataa	[~]	8.799	[~]	8.899	[~]	9.698	[~]	9.496	[+]	10.498	[+]	11.373	[+]	10.851	[+]	11.619	[+]	11.238	[+]	11.943	[~]	9.489	[~]	9.674	[+]	11.674	[+]	11.003	[~]	11.131	[~]	11.334	[+]	11.647	[+]
THC0290_T_0996	1	1540750	79	1056	SM1	0.866711	SigA	0.996335	147	THC0290_1337	NA	Two-component system sensor histidine kinase	THC0290_v2_1421	ACCagaatttaaaataagtaataTTACAGAAAATGGCTTAAATTTACAttacttttctaaa	[~]	9.805	[+]	9.977	[+]	10.981	[+]	10.995	[+]	12.027	[+]	13.546	[+]	12.363	[+]	13.015	[+]	12.627	[+]	13.697	[+]	10.603	[+]	10.782	[+]	13.211	[+]	12.138	[+]	12.231	[+]	12.373	[+]	12.651	[+]
THC0290_T_0997	-1	1541507	5	700	SM1	0.779074	SigA	0.957348	NA	NA	NA	NA	NA	TTGTaataataaatttgaaaaaatCTTCTATTTTATAATTAATTTCATCataaataaatga	[~]	4.506	[~]	4.532	[+]	5.316	[+]	5.454	[+]	5.848	[+]	6.271	[+]	6.318	[~]	7.886	[+]	5.352	[+]	6.395	[+]	5.372	[+]	5.072	[+]	5.412	[~]	4.729	[~]	4.046	[+]	5.323	[+]	6.394	[~]
THC0290_T_0998	1	1551784	9	725	SM1	0.833389	SigA	0.983006	NA	NA	NA	NA	NA	TAGAaacaggtaaccctaaagaaaTATCTTTAAAAACAATACCTTTACCtgggcatattgc	[~]	4.696	[~]	5.125	[~]	5.033	[~]	5.801	[~]	5.781	[~]	5.312	[~]	5.634	[~]	5.952	[~]	6.183	[~]	5.657	[~]	4.263	[~]	4.93	[~]	7.044	[-]	6.812	[~]	6.415	[~]	5.365	[-]	7.195	[-]
THC0290_T_0999	1	1556461	3	1738	SM1	0.997667	SigA	1	34	THC0290_1347	NA	Peptidase, U32 family	THC0290_v2_1431	AAATTTtaaataatctacaatttatATATGAAGTATTTTATACTTTTGCGgtttacgtttc	[+]	10.811	[+]	10.781	[~]	10.159	[~]	10.15	[~]	9.625	[~]	9.502	[~]	9.763	[~]	9.689	[~]	9.897	[~]	9.923	[~]	10.293	[~]	10.292	[+]	9.758	[+]	9.685	[~]	10.045	[~]	10.316	[+]	8.577	[~]
THC0290_T_1000	-1	1559423	6	1279	NA	0.979007	NA	1	NA	NA	NA	NA	NA	acaaatcttatgattttgaagaggttaaccattcTGAAGAAGTAGAAAATATTAGAAtgat	[~]	12.417	[~]	12.266	[~]	11.932	[~]	12.198	[~]	11.372	[~]	11.038	[~]	10.986	[~]	10.141	[~]	11.065	[~]	10.942	[~]	12.01	[~]	11.958	[~]	9.101	[~]	8.021	[~]	9.574	[~]	10.041	[~]	8.013	[~]
THC0290_T_1001	-1	1560038	3	536	NA	0.474175	NA	0.917028	NA	NA	NA	NA	NA	atttgggaccacaattaggggtagcagacggaatcgCTTTAgcaaataaattaaaaaagaa	[-]	11.773	[-]	11.824	[-]	11.392	[-]	11.45	[-]	10.69	[-]	10.633	[-]	10.342	[~]	10.036	[~]	10.543	[~]	10.066	[-]	11.624	[-]	11.282	[-]	8.359	[-]	7.45	[-]	8.819	[-]	8.947	[-]	6.577	[~]
THC0290_T_1002	-1	1560465	6	1809	SM3	0.676774	SigA	0.998667	22	THC0290_1348	bfmBA	3-methyl-2-oxobutanoate dehydrogenase (2-methylpropanoyl-transferring)	THC0290_v2_1432	ttgtgtaattcgtaCTCaaaaaaaccatcTCTTTTTTATACTTTTACgccacattaaaaaa	[+]	11.952	[+]	11.919	[+]	11.84	[+]	11.493	[+]	10.714	[+]	10.975	[+]	10.153	[+]	9.685	[+]	10.204	[+]	10.504	[+]	11.787	[+]	11.596	[+]	9.648	[+]	8.842	[+]	8.855	[+]	9.441	[+]	9.557	[+]
THC0290_T_1003	1	1560671	159	1487	SM1	0.83872	SigA	1	5;46	THC0290_N_0854;THC0290_1349	NA;NA	new transcription segment;Probable oxidoreductase	NA;THC0290_v2_1434	GAATagcaggaaattgctcctaaTAAAAAATATATTTATACATTTGTTttatgatggtatt	[+]	12.16	[+]	11.961	[+]	12.086	[+]	12.036	[+]	11.573	[+]	12.091	[+]	11.262	[+]	11.426	[+]	11.873	[+]	11.925	[+]	12.302	[+]	12.192	[+]	11.772	[+]	11.683	[+]	11.458	[+]	11.672	[+]	11.501	[+]
THC0290_T_1004	1	1561608	7	327	NA	0.951683	NA	1	77;107;250	THC0290_N_0855;THC0290_N_0856;THC0290_1350	NA;NA;NA	new transcription segment;new transcription segment;Protein of unknown function	NA;NA;NA	atgttttagagaattgtgttgatgcggaaaatccAAAATTATACGAAGATATTTCGGcagg	[~]	11.82	[~]	11.651	[~]	11.504	[~]	11.626	[~]	10.906	[~]	10.977	[~]	10.671	[~]	12.05	[~]	11.198	[~]	10.856	[~]	11.807	[~]	11.361	[~]	10.816	[~]	10.608	[~]	10.972	[~]	11.12	[-]	10.321	[~]
THC0290_T_1005	1	1561684	23	403	SM1	0.884372	SigA	0.998334	1;31;174	THC0290_N_0855;THC0290_N_0856;THC0290_1350	NA;NA;NA	new transcription segment;new transcription segment;Protein of unknown function	NA;NA;NA	AAGattggtcgatttgggattaaTCAAAAAATAATTTATAATTTTATAtcattaagaaaga	[-]	8.866	[-]	8.35	[-]	8.453	[-]	7.997	[-]	7.813	[-]	8.498	[-]	7.945	[-]	7.705	[-]	8.534	[-]	9.409	[-]	8.442	[-]	8.659	[-]	8.357	[-]	8.101	[-]	8.078	[-]	8.272	[-]	7.949	[-]
THC0290_T_1006	1	1565415	38	1045	SM1	0.962013	SigA	1	NA	NA	NA	NA	NA	TTTttaaaaccttttctccatttATCAAAAAATTTATCTATATTAGTActgcattttcctc	[~]	10.261	[~]	9.967	[~]	10.051	[~]	9.844	[~]	9.874	[+]	10.595	[+]	10.106	[+]	10.96	[+]	10.014	[+]	10.769	[~]	10.092	[~]	10.057	[+]	11.893	[+]	11.372	[+]	10.11	[+]	9.957	[+]	11.706	[+]
THC0290_T_1007	-1	1567480	3	1029	SM3	0.796734	SigA	0.997667	1	THC0290_N_0860	NA	new transcription segment	NA	tgttgttctgtaatTTCtgtatccttttaTTTGTTTGGTATCTTTGAagtattttgtggtt	[~]	6.67	[~]	6.511	[+]	6.364	[~]	6.511	[+]	6.682	[+]	6.729	[~]	6.488	[+]	6.465	[+]	7.374	[+]	7.106	[~]	6.469	[~]	6.538	[+]	7.957	[+]	8.008	[+]	7.577	[+]	7.121	[+]	7.993	[+]
THC0290_T_1008	-1	1568759	9	1119	SM1	0.930023	SigA	1	19	THC0290_1358	ung	Uracil-DNA glycosylase	THC0290_v2_1443	AGTtacaaagtttagcagtagtaATGAATTAAACTGATTATATTTGTGcaataataataaa	[+]	8.987	[+]	8.85	[+]	8.745	[+]	8.896	[+]	9.322	[+]	9.224	[+]	9.281	[+]	9.656	[+]	10.538	[+]	10.537	[+]	8.607	[+]	8.753	[+]	10.743	[+]	10.761	[+]	9.807	[+]	9.631	[+]	11.198	[+]
THC0290_T_1009	1	1568816	5	607	SM1	0.993669	SigA	0.999	33	THC0290_1359	NA	MutS family protein	THC0290_v2_1444	AATATaatcagtttaattcattacTACTGCTAAACTTTGTAACTTTGGGgctttgcaactt	[+]	8.413	[+]	8.264	[+]	8.279	[+]	7.977	[+]	8.274	[+]	9.061	[+]	9.04	[+]	9.24	[+]	8.634	[+]	9.731	[+]	8.11	[+]	8.192	[+]	10.277	[+]	9.611	[+]	9.083	[+]	9.001	[+]	7.961	[+]
THC0290_T_1010	-1	1571562	7	1826	SM2	0.517494	SigA	1	1;49;478	THC0290_N_0863;THC0290_1360;THC0290_N_0862	NA;NA;NA	new transcription segment;Protein of unknown function;new transcription segment	NA;NA;NA	acaggatttgcaattAGtattagacggtttTTTTGTACTACTTTTGCAATCCTTTggtttt	[+]	10.352	[+]	10.152	[+]	8.94	[+]	8.616	[+]	7.652	[+]	7.659	[+]	7.424	[+]	7.704	[+]	7.712	[+]	8.722	[+]	8.977	[+]	9.1	[+]	8.535	[+]	8.507	[+]	8.143	[+]	8.511	[+]	7.539	[+]
THC0290_T_1011	1	1571797	22	1854	SM2	0.796401	SigA	1	16	THC0290_1361	pheT	Phenylalanine--tRNA ligase beta subunit	THC0290_v2_1446	aaaggaaaacttttTTTTatactacgaactACAATACTTATATTTGCAGCTCAATaattac	[+]	12.026	[+]	11.881	[+]	11.729	[+]	11.487	[+]	11.813	[+]	11.964	[+]	11.691	[+]	9.926	[+]	11.763	[+]	11.914	[+]	11.591	[+]	11.637	[+]	11.378	[+]	11.237	[+]	10.962	[+]	11.12	[+]	11.221	[+]
THC0290_T_1012	1	1572129	14	1671	NA	0.969344	NA	0.995668	NA	NA	NA	NA	NA	aggacaaaaagtccccGTAGCcacaattggaaccATTTTGTACGACAAAGAAGGAAAATca	[~]	12.717	[~]	12.798	[~]	12.617	[+]	12.594	[~]	12.548	[~]	12.66	[+]	12.822	[+]	10.507	[~]	12.429	[~]	12.411	[+]	12.48	[+]	12.595	[~]	11.17	[~]	10.765	[~]	11.495	[~]	11.62	[~]	10.824	[~]
THC0290_T_1013	-1	1575062	3	1677	NA	0.668444	NA	0.878041	NA	NA	NA	NA	NA	acctaagcgcttcgatagatggtgaggttttatttaaaaatgtagatttgaatatggcaaa	[+]	12.322	[~]	12.14	[+]	11.592	[+]	11.94	[+]	11.684	[~]	11.504	[~]	11.871	[+]	12.968	[~]	12.685	[+]	12.473	[+]	11.839	[+]	11.503	[+]	11.296	[+]	10.915	[+]	11.761	[~]	11.747	[~]	10.761	[~]
THC0290_T_1014	-1	1576100	3	1300	SM1	0.928024	SigA	1	24	THC0290_1362	NA	Probably involved in regulation of translation initiation	THC0290_v2_1447	AACacgaaactcataccgtaaacTTCCACTATTTTTGTTACTTTTGCAagacttttataaa	[+]	11.287	[+]	11.179	[+]	10.461	[+]	10.534	[+]	10.638	[+]	10.114	[+]	10.832	[+]	11.751	[+]	11.523	[+]	11.531	[+]	10.513	[+]	10.44	[+]	10.16	[+]	10.133	[+]	10.68	[+]	11.083	[+]	9.995	[+]
THC0290_T_1015	1	1576137	3	170	NA	0.630123	NA	0.637121	-8;36	THC0290_N_0864;THC0290_1363	NA;NA	new transcription segment;Probable transmembrane protein of unknown function	NA;THC0290_v2_1448	atttttataaaagtcttgcaaaagtaacaaaaatAGTGGAAGTTTACGGTATGAGTTtcgt	[+]	8.678	[+]	8.684	[+]	8.793	[+]	8.69	[+]	8.23	[+]	8.32	[+]	8.134	[+]	7.654	[+]	8.104	[+]	9.187	[+]	8.915	[+]	8.877	[+]	9.019	[+]	8.829	[+]	8.02	[+]	7.999	[+]	8.368	[+]
THC0290_T_1016	1	1578884	5	852	SM1	0.999334	SigA	1	17	THC0290_1367	NA	Protein of unknown function	NA	TTTAactgtctattaacagcatatTATCAATTATAAAAATACATTTGCTtatcataaatat	[+]	10.909	[+]	11.099	[+]	10.975	[+]	10.994	[+]	10.682	[+]	11.578	[+]	10.971	[+]	11.899	[+]	10.269	[+]	11.975	[+]	10.667	[+]	10.766	[+]	13.776	[+]	12.906	[+]	11.654	[+]	11.677	[+]	13.478	[+]
THC0290_T_1017	-1	1580892	33	1316	SM1	0.875708	SigA	0.97934	NA	NA	NA	NA	NA	GAATtacgggaaaaaataacattTTGAAGCATTATGTTGATATTTGTAatattgtagaagg	[~]	12.403	[+]	12.747	[+]	12.406	[+]	12.457	[+]	12.644	[+]	12.178	[+]	12.655	[~]	12.294	[+]	13.154	[~]	12.615	[+]	12.116	[+]	12.461	[~]	12.68	[~]	13.402	[~]	12.919	[~]	12.931	[~]	15.056	[~]
THC0290_T_1018	-1	1582392	84	261	NA	0.876375	NA	0.966011	-41;57;109;291	THC0290_miscRNA_0045;THC0290_N_0869;THC0290_1370;THC0290_1369	NA;NA;NA;NA	Bacterial small signal recognition particle RNA;new transcription segment;Truncated chloromuconate cycloisomerase;Probable short-chain type dehydrogenase	NA;NA;NA;THC0290_v2_1452	tatttgcaAcggcaagtcctacaCGACCAGCTCCTGCAGACTCCTCCAgggtgggaacgca	[+]	8.676	[+]	8.723	[+]	8.255	[+]	8.562	[+]	8.208	[+]	8.319	[+]	8.898	[+]	10.362	[+]	9.163	[+]	9.354	[+]	8.154	[+]	8.234	[+]	10.599	[+]	10.101	[+]	9.716	[+]	8.707	[+]	11.022	[+]
THC0290_T_1019	-1	1582432	1984	1113	SM2	0.922026	SigA	1	-1;97;149;331	THC0290_miscRNA_0045;THC0290_N_0869;THC0290_1370;THC0290_1369	NA;NA;NA;NA	Bacterial small signal recognition particle RNA;new transcription segment;Truncated chloromuconate cycloisomerase;Probable short-chain type dehydrogenase	NA;NA;NA;THC0290_v2_1452	atataaacaaaagtaCTTGcaaaaatataaAAAGGTTGTATATTTGCAACGGCAAgtccta	[+]	9.708	[+]	9.931	[+]	9.283	[+]	9.742	[+]	9.481	[+]	9.906	[+]	10.148	[+]	11.515	[+]	10.869	[+]	11.194	[+]	9.388	[+]	9.381	[+]	11.993	[+]	11.885	[+]	11.189	[+]	10.281	[+]	12.874	[+]
THC0290_T_1020	1	1582507	9	1530	SM5	0.896368	ND	0.896368	15	THC0290_1371	NA	Putative glutamine cyclotransferase	THC0290_v2_1454	atttttgcaagtacTtttgtttatataaaatgaaGTTATATATTGTATTCacaaaatagct	[+]	9.688	[+]	9.769	[+]	9.671	[+]	9.293	[+]	8.546	[+]	8.61	[+]	7.546	[+]	7.32	[+]	7.173	[+]	8.717	[+]	9.806	[+]	9.994	[+]	8.803	[+]	8.976	[+]	8.056	[+]	8.072	[+]	8.943	[+]
THC0290_T_1021	-1	1585517	35	606	SM1	0.986005	SigA	0.999667	0;120	THC0290_N_0873;THC0290_1373	NA;holA	new transcription segment;Probable DNA polymerase III, delta subunit	NA;THC0290_v2_1456	TTTacgaatttcatcaaaaatagAAACTTTATTTTCACTATTTTTGAAccgaaatgtataa	[+]	8.018	[+]	8.062	[+]	8.251	[+]	8.076	[+]	7.883	[+]	8.984	[+]	7.764	[~]	7.916	[+]	8.943	[+]	9.912	[+]	8.018	[+]	8.27	[+]	9.418	[+]	7.522	[+]	7.842	[+]	8.412	[+]	8.949	[+]
THC0290_T_1022	1	1585871	41	1053	SM1	0.650783	SigA	0.998334	67	THC0290_1375	NA	Glycosyl transferase, group 2 family protein	THC0290_v2_1458	AGGcaaaatatttaatggtaactAATGGTTTAAATCATTATTTTTGTAaaatggattttga	[~]	9.984	[~]	10.169	[~]	10.132	[+]	10.302	[~]	10.722	[+]	11.495	[~]	10.916	[~]	10.835	[~]	11.462	[+]	12.166	[~]	10.127	[~]	10.256	[+]	12.021	[+]	11.351	[+]	10.719	[~]	10.841	[+]	11.038	[+]
THC0290_T_1023	1	1586960	18	596	SM1	0.968677	SigA	1	21;261	THC0290_1376;THC0290_N_0874	NA;NA	Hypothetical protein;new transcription segment	NA;NA	AATATcaagctttttagaaacaattTTTAAAGATTAATACTACCTTTGCCctttctttata	[~]	11.512	[~]	11.543	[~]	11.502	[~]	11.548	[~]	11.995	[+]	12.774	[+]	12.223	[+]	12.971	[+]	13.282	[+]	13.786	[~]	11.592	[~]	11.417	[+]	12.841	[+]	11.958	[+]	12.297	[+]	12.626	[+]	11.576	[+]
THC0290_T_1024	-1	1588046	4	495	SM3	0.504832	SigA	0.997334	1;85	THC0290_N_0875;THC0290_1378	NA;NA	new transcription segment;Protein of unknown function	NA;NA	tttgcaacatttttatctattgtaaagaGTTATTGTTGTTATTTTGTtgcgatttataatt	[+]	8.635	[+]	8.96	[+]	8.792	[+]	8.422	[+]	8.182	[+]	9.117	[+]	8.082	[+]	9.2	[+]	9.362	[+]	10.453	[+]	8.759	[+]	8.548	[+]	9.932	[+]	9.268	[+]	8.823	[+]	8.98	[+]	9.297	[+]
THC0290_T_1025	1	1588139	3	1526	SM1	0.658114	SigA	0.830723	11	THC0290_1379	adeC	Adenine deaminase	THC0290_v2_1462	GTTgcaaaaataaaaaatggtatTACTTTTAACATTTATTACTTTATTtaaaataaaacaa	[+]	8.653	[+]	8.496	[+]	8.354	[+]	8.064	[+]	7.673	[+]	7.287	[+]	6.998	[+]	6.293	[+]	8.166	[+]	7.439	[+]	8.498	[+]	8.518	[+]	8.079	[+]	8.081	[+]	7.67	[+]	7.789	[+]	8.036	[+]
THC0290_T_1026	1	1589154	5	503	SM1	0.722093	SigA	0.995002	NA	NA	NA	NA	NA	TTGgttgccgaaaacggacaatcATTTGTAGAAAATATTAATTTTGAAacgccaaataact	[~]	9.52	[~]	9.533	[~]	9.133	[~]	9.124	[+]	8.724	[+]	8.893	[~]	8.461	[+]	8.039	[+]	9.162	[+]	9.231	[~]	9.522	[~]	9.414	[+]	9.297	[~]	8.811	[~]	8.365	[+]	8.883	[~]	8.184	[+]
THC0290_T_1027	-1	1589915	3	1626	SM1	0.828057	SigA	0.893036	58	THC0290_N_0876	NA	new transcription segment	NA	GTTTTAggaaatccagaaggtacaaaTCATCAAAATATCCGTAATTTTATCaaaacgggct	[-]	6.836	[-]	6.853	[-]	7.223	[-]	7.111	[-]	8.062	[-]	7.236	[-]	8.437	[-]	7.823	[-]	7.047	[-]	6.473	[-]	7.35	[-]	7.354	[~]	6.694	[-]	6.788	[-]	6.771	[-]	7.295	[~]	7.977	[-]
THC0290_T_1028	-1	1591877	4	772	SM1	0.901033	SigA	0.998334	0;127	THC0290_N_0878;THC0290_1382	NA;NA	new transcription segment;Protein of unknown function	NA;THC0290_v2_1465	TTTtttatttttataatgataaaAATGAATAGTTTTTATTACTTTGTAacagaacaaattt	[+]	8.874	[+]	8.94	[+]	9.204	[+]	9.057	[+]	9.709	[+]	9.815	[+]	9.448	[+]	10.758	[+]	9.043	[+]	10.437	[+]	9.175	[+]	9.452	[+]	10.215	[+]	10.056	[+]	9.745	[+]	10.017	[+]	10.303	[+]
THC0290_T_1029	1	1591878	11	928	SM3	0.774742	SigA	0.999667	49	THC0290_1383	tdk	Thymidine kinase	THC0290_v2_1466	cttttacaattatacGCtctaaagctatgTTTTTTTAATAAATTTGTtctgttacaaagta	[+]	10.664	[+]	10.568	[+]	10.805	[+]	10.859	[+]	11.267	[+]	11.507	[+]	11.481	[+]	10.302	[+]	12.212	[+]	12.114	[+]	10.735	[+]	10.654	[+]	11.676	[+]	11.505	[+]	11.209	[+]	11.269	[+]	11.969	[+]
THC0290_T_1030	1	1595042	19	1815	SM1	0.960347	SigA	0.984005	-43;43;460	THC0290_N_0879;THC0290_1385;THC0290_N_0880	NA;mscL;NA	new transcription segment;Large-conductance mechanosensitive channel;new transcription segment	NA;THC0290_v2_1468;NA	agAATAATtacacgaaatttggttcttATTAAAATAAAATCTTAAATTAGCTttttttaaa	[+]	13.365	[+]	13.421	[+]	13.585	[+]	13.548	[+]	13.102	[+]	12.997	[+]	12.311	[+]	11.947	[~]	11.304	[+]	11.53	[+]	13.606	[+]	13.785	[+]	11.095	[+]	10.959	[+]	11.427	[+]	11.573	[+]	10.791	[+]
THC0290_T_1031	1	1595629	13	1292	SM5	0.49117	ND	-1	19	THC0290_1386	porX	Probable two-component system response regulatory protein containing PglZ domain PorX	THC0290_v2_1469	ttttagaataaatttaagaatactatatataaTAAGTATTAAATTGCGacataaaacataa	[~]	13.704	[~]	13.747	[~]	14.013	[~]	14.052	[~]	13.833	[+]	13.929	[~]	12.965	[~]	13.902	[~]	12.106	[+]	12.875	[~]	14.034	[~]	14.199	[+]	13.78	[+]	13.198	[+]	12.789	[+]	13.265	[+]	12.967	[+]
THC0290_T_1032	1	1606777	3	150	SM3	0.586138	SigA	0.83872	1;111;143;305	THC0290_N_0884;THC0290_flavo-1_0073;THC0290_N_0885;THC0290_1393	NA;NA;NA;thrS	new transcription segment;Flavo-1 RNA;new transcription segment;Threonine--tRNA ligase	NA;NA;NA;THC0290_v2_1477	tataacgcgggtatCTttatttttttaatGGGTTTTGTATTATTGCatttgcattttgtgg	[~]	8.101	[~]	8.356	[~]	8.631	[~]	8.879	[~]	8.894	[~]	9.071	[~]	9.252	[~]	8.133	[~]	10.143	[~]	10.169	[~]	8.478	[~]	8.471	[~]	10.855	[~]	10.122	[~]	10.515	[~]	10.575	[~]	10.893	[~]
THC0290_T_1033	1	1607068	396	1865	SM2	0.995668	SigA	1	14	THC0290_1393	thrS	Threonine--tRNA ligase	THC0290_v2_1477	cataccttatatatATTGtatgttttttcGAAACTAGTATATTTGCATTCATAAatttaca	[+]	12.995	[+]	12.945	[+]	12.675	[+]	12.738	[+]	12.131	[+]	11.899	[+]	11.565	[+]	10.12	[+]	11.645	[+]	11.685	[+]	12.646	[+]	12.525	[+]	11.059	[+]	11.038	[+]	10.926	[+]	11.285	[+]	11.563	[+]
THC0290_T_1034	1	1608804	72	1861	SM2	0.998001	SigA	1	225;383	THC0290_N_0886;THC0290_1394	NA;infC	new transcription segment;Translation initiation factor IF-3	NA;THC0290_v2_1478	tatatgcgaaaaaagTTTTaaatctgctagAAAATCACGAAATTCGCGCCCTAATtgataa	[+]	13.983	[+]	14.004	[+]	14.107	[+]	13.914	[+]	13.72	[+]	13.766	[+]	13.415	[+]	12.53	[+]	14.382	[+]	14.561	[+]	14.159	[+]	14.017	[+]	13.056	[+]	12.497	[+]	13.049	[+]	13.622	[+]	12.445	[+]
THC0290_T_1035	1	1609592	15	1672	NA	0.624125	NA	0.973675	9;118;316;490	THC0290_N_0887;THC0290_1395;THC0290_N_0888;THC0290_1396	NA;rpmI;NA;rplT	new transcription segment;50S ribosomal protein L35;new transcription segment;50S ribosomal protein L20	NA;THC0290_v2_1479;NA;THC0290_v2_1480	tgccagttcttgaaggaaaaagaatgattatgttTATTGCTCCGAAGAAGAAAAAATAGta	[~]	14.166	[~]	14.179	[~]	13.933	[~]	13.711	[~]	13.102	[+]	13.414	[+]	12.878	[+]	13.252	[~]	12.876	[+]	13.538	[+]	13.908	[+]	14.002	[+]	12.724	[~]	12.118	[+]	12.889	[+]	13.208	[~]	12.077	[+]
THC0290_T_1036	1	1609675	51	1648	NA	0.582473	NA	0.986005	35;233;407	THC0290_1395;THC0290_N_0888;THC0290_1396	rpmI;NA;rplT	50S ribosomal protein L35;new transcription segment;50S ribosomal protein L20	THC0290_v2_1479;NA;THC0290_v2_1480	aaagttttaaaaacttatgtcttgtggcttatggCTTATCACTTAAAGATAGTAAGTaaga	[+]	14.911	[+]	14.964	[+]	15.321	[+]	15.245	[+]	15.395	[+]	15.636	[+]	15.029	[+]	15.316	[+]	15.443	[+]	15.477	[+]	15.067	[+]	15.202	[+]	14.448	[+]	13.629	[+]	14.696	[+]	14.97	[+]	13.753	[+]
THC0290_T_1037	1	1610138	45	159	NA	0.728091	NA	1	289	THC0290_N_0889	NA	new transcription segment	NA	agaTCagtaaattcagttgctaaaagAGCAAGAAGAAAAAAGATAATGAagcaagccaaag	[~]	14.609	[~]	14.717	[~]	14.843	[~]	14.833	[~]	15.244	[~]	15.175	[~]	14.761	[~]	15.284	[~]	15.389	[~]	15.09	[~]	14.58	[~]	14.862	[~]	13.885	[~]	13.317	[~]	14.466	[~]	14.507	[~]	13.447	[~]
THC0290_T_1038	1	1610943	19	1587	SM1	0.963679	SigA	0.999667	14	THC0290_1397	NA	Peptidase, M16 family	THC0290_v2_1481	TTTTaacataactttcagaaaattACCACATCCTTTCCCTATTTTTGAAacaaactaataa	[+]	12.256	[+]	12.346	[+]	12.839	[+]	12.337	[+]	11.296	[+]	11.796	[+]	11.218	[+]	9.016	[+]	10.055	[+]	10.718	[+]	12.719	[+]	12.6	[+]	12.177	[+]	12.277	[+]	10.895	[+]	10.665	[+]	13.036	[+]
THC0290_T_1039	1	1612261	4	9	NA	0.862379	NA	0.994335	NA	NA	NA	NA	NA	aaaggcaacttCGAGgaaatgatgattccagcaaTCATTAATAACATGAAACTTGATgtga	[~]	13.026	[~]	12.967	[~]	13.036	[~]	13.035	[~]	12.075	[~]	11.551	[~]	11.783	[~]	11.218	[~]	9.791	[~]	9.73	[~]	13.027	[~]	12.956	[~]	10.475	[~]	10.489	[~]	11.044	[~]	11.228	[~]	10.513	[~]
THC0290_T_1040	1	1618612	4	348	SM2	0.558814	SigA	0.945352	NA	NA	NA	NA	NA	atttgtatgttttccTTGgtaactgggtgaATAAAAACTAATTTTCTGGCATGAAgatgta	[~]	4.14	[~]	3.932	[~]	4.02	[+]	4.879	[~]	4.333	[~]	4.619	[~]	4.394	[~]	4.331	[~]	4.759	[~]	5.186	[~]	4.166	[~]	4.14	[+]	5.322	[+]	7.597	[~]	4.88	[~]	4.439	[+]	8.542	[-]
THC0290_T_1041	-1	1621429	6	1401	SM1	0.932023	SigA	0.999334	39	THC0290_1403	panB1	3-methyl-2-oxobutanoate hydroxymethyltransferase panB1	THC0290_v2_1487	TTTttcttcctatttacaagtaaACTAATCGATTTTATTACTTTTACAacctaatatttaa	[~]	10.935	[~]	10.878	[~]	10.404	[~]	10.527	[~]	9.81	[~]	9.622	[~]	9.257	[+]	7.119	[+]	9.115	[+]	9.196	[~]	10.492	[~]	10.506	[+]	8.929	[+]	8.921	[+]	9.081	[+]	9.195	[+]	9.386	[+]
THC0290_T_1042	-1	1622544	4	637	NA	0.843719	NA	0.995002	NA	NA	NA	NA	NA	taaatctagcaGaagaattattacaatattgtatTTCGAAAAACAAAAAAATATCTGaaat	[~]	10.753	[~]	10.783	[~]	10.598	[~]	10.559	[~]	10.223	[~]	9.802	[~]	9.798	[-]	6.258	[~]	9.552	[~]	9.295	[~]	10.63	[~]	10.472	[-]	7.892	[-]	7.335	[-]	8.305	[~]	8.738	[-]	7.2	[-]
THC0290_T_1043	-1	1623310	8	1491	SM1	0.998667	SigA	0.999667	1;193	THC0290_N_0895;THC0290_1404	NA;sdaA	new transcription segment;L-serine ammonia-lyase	NA;THC0290_v2_1488	TAATacaaaattaatattctaaatTTATCAAACAAAACATATATTTGTGcggggcaaacac	[+]	10.569	[+]	10.34	[+]	10.65	[+]	10.598	[+]	10.582	[+]	11.781	[+]	10.558	[+]	11.7	[+]	10.561	[+]	10.864	[+]	10.621	[+]	10.664	[+]	9.716	[+]	9.228	[+]	8.833	[+]	9.419	[+]	10.027	[+]
THC0290_T_1044	1	1623402	4	762	SM1	0.656115	SigA	0.998334	19	THC0290_1405	NA	Probable phosphoglycerol transferase	THC0290_v2_1489	TTtgtattaaaattcttcctttGCTATTATATTTTTATAATTTTACAaacaattataatgt	[+]	9.645	[+]	9.549	[+]	9.71	[+]	9.782	[+]	9.912	[+]	10.398	[+]	9.853	[+]	11.242	[+]	10.232	[+]	10.333	[+]	9.494	[+]	9.352	[+]	11.162	[+]	10.849	[+]	10.048	[+]	10.244	[+]	11.138	[+]
THC0290_T_1045	1	1625187	7	376	SM3	0.886704	SigA	0.997334	307;389	THC0290_N_0896;THC0290_1406	NA;NA	new transcription segment;Protein of unknown function	NA;THC0290_v2_1490	ggtggacaatatcagTTTatgcaaggaaaTTATATTTGTACTTTTGAtgggaaagaaattg	[~]	10.305	[~]	10.322	[~]	10.67	[~]	10.745	[~]	10.958	[~]	10.928	[~]	10.909	[~]	11.616	[~]	10.517	[~]	10.411	[~]	10.211	[~]	10.34	[~]	10.177	[~]	9.941	[~]	10.271	[~]	10.703	[~]	9.167	[~]
THC0290_T_1046	-1	1635251	16	1154	SM1	0.725092	SigA	0.948351	38	THC0290_1412	recJ	Single-stranded-DNA-specific exonuclease RecJ	THC0290_v2_1496	CttttttttgattataaattaTTGAATGTTTTAAGCTAAATTTGTTttttatacaacgata	[+]	9.798	[+]	9.739	[+]	9.716	[+]	9.815	[+]	9.756	[+]	9.985	[+]	9.779	[+]	9.595	[+]	10.494	[+]	10.711	[+]	9.806	[+]	9.85	[+]	11.155	[+]	11.428	[+]	10.291	[+]	10.064	[+]	12.178	[+]
THC0290_T_1047	1	1635371	31	1623	SM1	0.829057	SigA	0.999334	1;174	THC0290_N_0902;THC0290_1413	NA;NA	new transcription segment;Protein of unknown function	NA;THC0290_v2_1497	TTAAagctaaaaattattcgatctTTAGCTTTAAATTATTAAATTTGCGgcaaattaaaaa	[+]	11.105	[+]	11.229	[+]	10.903	[+]	10.6	[+]	10.356	[+]	10.98	[+]	10.287	[+]	10.25	[+]	11.502	[+]	11.475	[+]	10.992	[+]	10.727	[+]	10.539	[+]	10.533	[+]	10.138	[+]	10.48	[+]	11.357	[+]
THC0290_T_1048	-1	1635994	6	1020	SM5	0.994668	ND	0.994668	1	THC0290_N_0903	NA	new transcription segment	NA	ttgaaagtataaatatataattgctaatgataaaAGTGTAACTTGTACTCAgttgttttat	[~]	9.489	[~]	9.433	[~]	9.998	[~]	10.116	[~]	11.062	[+]	12.534	[~]	12.102	[+]	13.989	[+]	13.808	[+]	14.356	[~]	9.751	[~]	9.715	[+]	14.926	[~]	13.279	[+]	13.267	[~]	12.788	[~]	13.01	[+]
THC0290_T_1049	1	1637088	32	1203	SM2	0.75075	SigA	0.999	0;350	THC0290_N_0905;THC0290_1415	NA;prfB	new transcription segment;Peptide chain release factor 2 (RF-2)	NA;THC0290_v2_1499	gctaactaaatttaTTTCcatatttcggatAAAATTCTTATTTTTACAAATCAATcaatcc	[+]	11.436	[+]	11.301	[+]	12.008	[+]	11.776	[+]	12.098	[+]	13.025	[+]	12.695	[+]	11.205	[+]	12.816	[+]	13.231	[+]	11.97	[+]	11.85	[+]	13.715	[+]	13.283	[+]	12.644	[+]	12.407	[+]	13.945	[+]
THC0290_T_1050	-1	1637202	26	1129	SM1	0.977341	SigA	1	1;16;144	THC0290_N_0904;THC0290_flavo-1_0075;THC0290_1414	NA;NA;ltaE	new transcription segment;Flavo-1 RNA;Threonine aldolase	NA;NA;THC0290_v2_1498	ATAccttttatttgttcggtattTGTCATAAATTTGTTTAATTTTGTAttaataataatgc	[+]	9.737	[+]	9.708	[+]	9.958	[+]	9.88	[+]	10.325	[+]	10.413	[+]	11.101	[+]	10.414	[+]	12.437	[+]	12.474	[+]	9.715	[+]	9.555	[+]	13.309	[+]	13.032	[+]	12.744	[+]	12.153	[+]	14.489	[+]
THC0290_T_1051	1	1637390	3	1270	NA	0.544818	NA	0.997334	48	THC0290_1415	prfB	Peptide chain release factor 2 (RF-2)	THC0290_v2_1499	cccccaacttttggaacaatgcaaaagaagcccaaATCATTGTAAAAAACCTACGATCAaa	[~]	11.775	[~]	11.681	[~]	12.412	[~]	12.237	[~]	12.468	[~]	12.646	[~]	12.948	[~]	10.381	[~]	12.72	[~]	12.636	[~]	12.207	[~]	12.289	[~]	13.065	[~]	12.505	[~]	12.852	[~]	12.518	[-]	13.211	[~]
THC0290_T_1052	1	1637401	4	51	NA	0.836388	NA	0.998667	37	THC0290_1415	prfB	Peptide chain release factor 2 (RF-2)	THC0290_v2_1499	tggaacaatgcaaaagaagcccaaatcattgtaaaaaACCTACGATCAAAAAAAAAATGGg	[~]	11.746	[~]	11.674	[~]	12.407	[~]	12.236	[~]	12.461	[~]	12.603	[~]	12.926	[~]	10.31	[~]	12.697	[~]	12.586	[~]	12.206	[~]	12.272	[~]	13.038	[~]	12.494	[~]	12.838	[~]	12.47	[-]	13.205	[~]
THC0290_T_1053	1	1637930	3	1746	NA	0.873042	NA	0.993336	429	THC0290_1416	NA	Putative endonuclease	NA	tagtagacgacacaatagaaatagaaataaatccTGCCGATATCGAGATTATAACCGcccg	[~]	11.37	[-]	11.119	[~]	11.409	[~]	11.358	[-]	10.932	[-]	11.05	[-]	11.592	[~]	8.618	[-]	9.907	[-]	10.202	[~]	11.755	[-]	11.321	[~]	11.381	[-]	10.787	[-]	10.974	[-]	10.711	[-]	10.907	[-]
THC0290_T_1054	-1	1640116	3	1433	NA	0.833389	NA	0.95868	NA	NA	NA	NA	NA	tttaatccaggacattctacgaaagacaggataGCGTTATATATTATCGAAGAAGCCGaaa	[~]	12.839	[~]	13.093	[~]	12.9	[~]	12.912	[~]	13.167	[~]	12.893	[~]	12.81	[~]	13.304	[~]	12.975	[~]	12.829	[~]	12.88	[~]	13.031	[~]	12.665	[~]	12.761	[~]	12.474	[~]	12.74	[~]	12.81	[~]
[truncated: 830 more rows]
[truncated: 93 more columns]

## Sheet: putative TSSs
id	strand	pos	cover	xcortree	sigmamotif	probamotif	sigmafactor	probasigma	downstreamgenes.dist	downstreamgenes.ltag	downstreamgenes.name	downstreamgenes.annot	downstreamgenes.ltagv2	seq
[truncated: 1,194 more rows]

[truncated: 1 more sheets: 5'-ends not analyzed]
