# Supplementary material for: Transcriptome architecture and regulation at environmental transitions in flavobacteria: the case of an important fish pathogen
Source: ISME Commun. 2021 Jul 7;1:33. doi: 10.1038/s43705-021-00029-9 (PMC9723704; doi:10.1038/s43705-021-00029-9)
Supplement: Supplementary file 4 — Table S3 [file 43705_2021_29_MOESM4_ESM.xlsx]

## Sheet: Legend
Table S3: Microarray expression values of transcribed regions of F. psychrophilum OSU THCO2-90 genome across 32 biological conditions.
Sheet	Description
all segments	Manually curated list of transcribed features of F. psychrophilum OSU THCO2-90 retrieved from reads coverage of the transcriptome RNA pool library sequencing. The different types of features are: annotated CDS, RFAM features and new transcribed regions defined in this study.
putative artefacts	List of detected features excluded from the list of new transcribed regions by manual curation after visual inspection of the transcriptome RNA pool library reads coverage.
Column	Description
Locustag	Locustag retrieved from the F. psychrophilum THCO2-90 genome, ENA accession number LT670843.1 of unique identifier (THC0290_N_...) for new TRs annotated in this study.
Start	Coordinates according to the F. psychrophilum THCO2-90 genome sequence LT670843.1.
End	Coordinates according to the F. psychrophilum THCO2-90 genome sequence LT670843.1.
Strand	(+) for positive, (-) for negative strand.
Type	The different types of features are: CDS, gene, rRNA and tRNA retrieved from LT670843.1; misc_RNA and misc_feature retrieved from RFAM; new transcribed regions defined in this study.
Classif	Manually validated structural annotation of new transcribed regions (TRs). The different categories are: 5prime, 3prime and 3prime-PT (3' region transcribed after partial termination), Indep (regions transcribed independently of annotated CDSs), Intra (between two annotated CDSs) and repeated_regions.
Name	Gene name according to the F. psychrophilum THCO2-90 genome sequence LT670843.1.
Locustag_v2	Locustag retrieved from the F. psychrophilum THCO2-90 genome annotation of the MicroScope annotation platform (unpublished data).
Name_v2	Gene name according to the F. psychrophilum THCO2-90 genome annotation of the MicroScope annotaiton platform (unpublished data).
Annotation	Description of the protein product.
Gene_context	CDS located downstream (for 5') or upstream (for 3') of the new TR.
xorder	When rows are reordered by xorder values, genes with close expression profiles across conditions are clustered together (genes within a same correlation cluster become adjacent).
A-cluster	Unique identifier for each cluster of level A (average Pearson correlation coefficient ≥ 0.8).
B-cluster	Unique identifier for each cluster of level B (average Pearson correlation coefficient ≥ 0.6).
C-cluster	Unique identifier for each cluster of level C (average Pearson correlation coefficient ≥ 0.4).
Length	Length of the feature in bp.
NfeatAS	Total number of features (CDS, TRs or RFAM elements) on the opposite strand.
NfeatAS.newregions	Number of new TRs on the opposite strand.
NfeatAS.CDSs	Number of CDS on the opposite strand.
NfeatAS.others	Number of other features (RFAM elements, repeated regions) on the opposite strand.
AS.ltag.all	Locustags of all features located on the opposite strand.
cdsprednumber	Number of predicted CDSs in new TRs.
cdspredinfo	Genomic coordinates of each of these predicted CDS, (+) for positive, (-) for negative strand.
cdspredproba	Confidence probability for each of these predicted CDS.
cdspredoverlapbp	Length of the overlap between the TR and each of these predicted CDSs.
cdspredaaseq	Predicted protein sequence.

## Sheet: all features
Locustag	Start	End	Strand	Type	Classif	Name	Locustag_v2	Name_v2	Annotation	Gene_context	xorder	A-cluster	B-cluster	C-cluster	Length	NfeatAS	NfeatAS.newregions	NfeatAS.CDSs	NfeatAS.others	AS.ltag.all	cdsprednumber	cdspredinfo	cdspredproba	cdspredoverlapbp	cdspredaaseq	T1_a	T1_c	T2_a	T2_c	T3_a	T3_c	T4_a	T4_c	T5_a	T5_c	T2-FCS_a	T2-FCS_b	TYESA-FCS_a	TYESA-FCS_b	TYESA_a	TYESA_b	TYESA-0.5_a	TYESA-0.5_b	TYESA-0.2_a	TYESA-0.2_b	CS3_a	CS3_c	Temp10C_a	Temp10C_c
THC0290_0001	554	2728	1	CDS	NA	rnr	THC0290_v2_0001	rnr	Ribonuclease R	NA	1966	A1753	B546	C143	2175	0	0	0	0	-	NA	NA	NA	NA	-	11.4	11.2	11.6	11.4	11.6	11.6	11.8	12.8	11	11.5	11.8	11.8	13.1	13.3	12.3	12.2	13.5	13.9	12.8	13	11.3	11.5	11.9	12
THC0290_0002	2737	3408	1	CDS	NA		THC0290_v2_0002		Protein of unknown function precursor	NA	393	A1227	B418	C125	672	0	0	0	0	-	NA	NA	NA	NA	-	11.3	11.3	11.5	11.6	11.8	11.5	11.9	12.9	10.3	10.9	11.5	11.7	11.7	11.8	11.9	12.1	11.3	11.1	11.2	10.8	11.4	11.3	12	12
THC0290_N_0001	3409	3490	1	Region	intra				new transcription segment	NA(CDS:THC0290_0003);NA(CDS:THC0290_0002)	834	A1552	B523	C143	82	0	0	0	0	-	0	NA	NA	NA	-	8.9	8.7	8.9	8.9	9.3	8.5	10.3	11.1	8.8	9.3	9.1	9.3	12.2	17.1	16	13.3	13.9	11.9	15.5	17	8.7	9.1	9.4	9.6
THC0290_0003	3517	4200	1	CDS	NA		THC0290_v2_0003		Probable transmembrane protein of unknown function	NA	394	A1227	B418	C125	684	0	0	0	0	-	NA	NA	NA	NA	-	10.8	10.5	10.7	10.7	11.1	10.6	11	12.3	10.3	10.4	10.8	11.1	11	11.4	11.4	11.6	11	10.7	11.1	11.3	10.5	10.9	11	11.1
THC0290_N_0002	4201	4240	1	Region	3prime				new transcription segment	NA(CDS:THC0290_0003)	-1	NA	NA	NA	40	1	1	0	0	THC0290_N_0003	0	NA	NA	NA	-	NA	NA	NA	NA	NA	NA	NA	NA	NA	NA	NA	NA	NA	NA	NA	NA	NA	NA	NA	NA	NA	NA	NA	NA
THC0290_N_0003	4221	4243	-1	Region	3prime-PT				new transcription segment	NA	-1	NA	NA	NA	23	1	1	0	0	THC0290_N_0002	0	NA	NA	NA	-	NA	NA	NA	NA	NA	NA	NA	NA	NA	NA	NA	NA	NA	NA	NA	NA	NA	NA	NA	NA	NA	NA	NA	NA
THC0290_N_0004	4241	4559	1	Region	3prime-PT				new transcription segment	NA	323	A1245	B419	C125	319	3	1	1	1	THC0290_0004;THC0290_N_0005;THC0290_tRNA_0001	0	NA	NA	NA	-	5.6	5.7	5.1	6.2	5.9	7	6.3	8.4	6.6	7.2	5.5	6.3	7.8	8.1	7.4	6.7	4	8.6	8.8	8.5	6.3	5.9	5.6	6.2
THC0290_tRNA_0001	4244	4317	-1	tRNA	NA				transfer RNA-Cys	NA	1616	A1769	B546	C143	74	1	1	0	0	THC0290_N_0004	NA	NA	NA	NA	-	8.2	7.9	8.1	8.5	8.6	10.4	9.7	13.2	11.5	12.4	8.7	8.2	12.8	12.2	11.3	10.3	13	14.1	14.7	14	8.3	8.1	8.1	8.7
THC0290_N_0005	4330	4421	-1	Region	5prime				new transcription segment	NA(Region:THC0290_N_0003)	471	A1325	B458	C133	92	1	1	0	0	THC0290_N_0004	0	NA	NA	NA	-	4	4.2	4.1	4.1	4.4	4.2	4	6	4.4	4.3	4	4.1	4	5.8	4.2	4	5.1	5.7	6.1	4	3.9	4	3.9	4
THC0290_0004	4422	4781	-1	CDS	NA	folB	THC0290_v2_0004	folB	Dihydroneopterin aldolase	NA	1764	A1762	B546	C143	360	1	1	0	0	THC0290_N_0004	NA	NA	NA	NA	-	9.3	9.6	10.2	10.2	10.8	10.9	10.8	12	11.5	11.6	10	10.4	11.2	11.3	11	10.9	10.9	11.5	11.8	11.1	9.1	9.4	9.7	9.3
THC0290_0005	4885	6972	1	CDS	NA	glnS	THC0290_v2_0005	glnS	Glutamine--tRNA ligase	NA	3081	A646	B183	C44	2088	1	1	0	0	THC0290_N_0006	NA	NA	NA	NA	-	11.3	11.2	10.9	11	10.9	11	11.1	11.2	11.1	10.8	11.2	11.1	10.7	10.8	11	10.8	10.4	10.5	10.2	9.9	11.3	11.2	11.3	11.3
THC0290_N_0006	5284	5631	-1	Region	indep	Rfp1			new transcription segment	NA	1918	A1248	B419	C125	348	1	0	1	0	THC0290_0005	0	NA	NA	NA	-	4.7	5.1	5.6	5.7	5.9	6.6	6	7.6	6.8	7.9	5.7	5.1	8.1	6	7.2	7.3	7	7.6	8.7	6.7	4.3	5.1	5	5.2
THC0290_0006	7285	7614	1	CDS	NA		THC0290_v2_0006		Hypothetical protein precursor	NA	1960	A1751	B546	C143	330	0	0	0	0	-	NA	NA	NA	NA	-	12.4	12.5	13	13	13.4	13.8	13.2	14.8	12.9	13.7	12.8	13.1	15.7	15.8	15	14.9	16	16	16.2	16.5	12.2	13	12.4	12
THC0290_0007	7614	7964	1	CDS	NA		THC0290_v2_0007		Probable transmembrane protein of unknown function	NA	1418	A1768	B546	C143	351	0	0	0	0	-	NA	NA	NA	NA	-	12.7	12.7	13.4	13.3	14.1	14.3	14.3	15.5	13.7	14.1	13.1	13.4	15.4	15.6	15.1	15.3	15.5	15.4	15.5	15.6	12.3	13.1	12.5	12.2
THC0290_0008	7968	8222	1	CDS	NA		THC0290_v2_0008		Protein of unknown function	NA	1419	A1768	B546	C143	255	1	1	0	0	THC0290_N_0007	NA	NA	NA	NA	-	12.4	12.7	13.1	13.4	14.1	14	14.2	15.4	14.3	14.3	13	13.2	15.4	15.4	15.3	15.5	15.1	15	15.4	15.1	12.3	12.9	12.5	12.1
THC0290_N_0007	8197	8243	-1	Region	3prime				new transcription segment	NA(CDS:THC0290_0009)	593	A1309	B448	C131	47	1	0	1	0	THC0290_0008	0	NA	NA	NA	-	3.9	3.9	3.9	3.9	3.9	3.9	3.9	6.3	7.1	6.7	3.9	4	5.8	3.9	3.9	4	8	7.4	4	4.4	4	3.9	4	3.9
THC0290_N_0008	8228	8499	1	Region	3prime-PT				new transcription segment	NA	1622	A1768	B546	C143	272	1	0	1	0	THC0290_0009	0	NA	NA	NA	-	6	5.6	6	6.3	7.1	8.2	8.6	10.3	9.3	9.9	6	5.4	9.7	9.6	8.1	8.2	8.9	9.5	10.7	10.5	6	5.9	5.5	5.8
THC0290_0009	8244	9227	-1	CDS	NA		THC0290_v2_0009		Band 7 family protein	NA	1028	A1710	B546	C143	984	1	1	0	0	THC0290_N_0008	NA	NA	NA	NA	-	11.6	11.6	11.9	11.9	12.1	12.4	12.5	12.4	13.2	13	11.8	11.9	12.5	12.3	12.5	12.5	12.6	12.6	14.6	14.5	11.4	11.4	11.9	12
THC0290_N_0009	9251	9388	-1	Region	intra				new transcription segment	NA(CDS:THC0290_0009);gltX(CDS:THC0290_0010)	2308	A802	B244	C67	138	0	0	0	0	-	0	NA	NA	NA	-	7.8	7.6	7	6.5	5.9	6.8	6.4	7.3	7.6	8	7.1	6.8	7.9	7.7	7.1	6.7	6.4	6.7	4.3	5.7	7.8	7.6	8.2	8.3
THC0290_0010	9389	10894	-1	CDS	NA	gltX	THC0290_v2_0010	gltX	Glutamate--tRNA ligase	NA	2310	A804	B244	C67	1506	1	1	0	0	THC0290_N_0010	NA	NA	NA	NA	-	11.1	11.2	10.6	10.5	10.3	10.1	10.4	10.8	11.1	11	10.5	10.5	10.6	10.9	10.7	10.7	10.4	10	9.9	10.7	11.1	11.2	11.7	11.8
THC0290_N_0010	10630	10929	1	Region	indep	Rfp2			new transcription segment	NA	1912	A1248	B419	C125	300	1	0	1	0	THC0290_0010	0	NA	NA	NA	-	4.9	4.6	5.3	5.7	5.9	6.2	6.3	8.7	7.4	7.5	5.2	5.3	8	6.4	7.3	7.1	6.5	6.6	8.6	6.1	4.6	5.1	4.3	4.2
THC0290_0011	11189	14521	1	CDS	NA		THC0290_v2_0011		Putative chromosome segregation ATPase	NA	2247	A1212	B415	C124	3333	0	0	0	0	-	NA	NA	NA	NA	-	10.1	10	10.2	10.2	10.1	10.1	10.5	10.5	9.9	10.7	10.1	10.3	12.3	12.2	11.9	11.8	11.4	11.3	11.1	10.8	10.1	10.2	9.7	9.7
THC0290_0012	14514	14936	1	CDS	NA		THC0290_v2_0012	ybeY	Endoribonuclease YbeY	NA	2248	A1212	B415	C124	423	0	0	0	0	-	NA	NA	NA	NA	-	9.6	9.6	9.5	9.7	9.5	9.2	9.6	10.1	10.2	10.4	9.6	9.5	11.1	11.3	11.3	11	10.6	10.4	10.6	9.4	10	9.8	10	9.8
THC0290_N_0011	14969	15146	1	Region	5prime				new transcription segment	gidA(CDS:THC0290_0013)	2249	A1212	B415	C124	178	0	0	0	0	-	0	NA	NA	NA	-	10.1	10.1	9.7	9.9	9.3	9.6	9.8	9.3	10.8	10.5	9.6	9.5	11	11.4	11	11.1	10.2	10.4	10.7	9.6	10	10	9.9	10.3
THC0290_0013	15147	17018	1	CDS	NA	gidA	THC0290_v2_0013	gidA	tRNA uridine 5-carboxymethylaminomethyl modification enzyme GidA	NA	2681	A409	B155	C43	1872	0	0	0	0	-	NA	NA	NA	NA	-	11.2	11.1	10.8	11	10.7	10.2	11.1	10.6	10.9	10.3	10.8	10.7	10.7	11.1	11.3	11.3	10.6	10.2	9.9	9.8	11.1	10.9	11	11.3
THC0290_N_0012	17019	17181	1	Region	3prime				new transcription segment	gidA(CDS:THC0290_0013)	2682	A409	B155	C43	163	0	0	0	0	-	0	NA	NA	NA	-	10.6	10.6	10.3	10.2	10	9.8	10.5	10.7	9.7	9.6	10.3	10.4	10.1	10.3	10.7	10.7	10	9.7	9.3	7.2	10.7	10.5	10.6	10.8
THC0290_0014	17182	18030	1	CDS	NA		THC0290_v2_0014		Probable SAM-dependent methyltransferase	NA	3085	A646	B183	C44	849	0	0	0	0	-	NA	NA	NA	NA	-	11	11.1	10.8	10.8	10.3	10.4	10.6	10.9	9.3	9.5	10.8	10.7	10.1	10	10.5	10.6	9.7	9.7	8.9	8.7	11.2	11.1	11	11.2
THC0290_N_0013	18031	18294	1	Region	3prime				new transcription segment	NA(CDS:THC0290_0014)	3086	A646	B183	C44	264	0	0	0	0	-	0	NA	NA	NA	-	10.8	10.7	10.4	10.2	9.8	9.6	10	10.6	6.5	8.1	10.2	10.3	9.3	9.5	9.9	10	9.3	8.9	4	6.5	10.8	10.7	10.7	10.9
THC0290_0015	18295	18858	1	CDS	NA		THC0290_v2_0015		Probable outer membrane lipoprotein precursor, OmpH family	NA	3428	A600	B183	C44	564	0	0	0	0	-	NA	NA	NA	NA	-	12.6	12.7	12.5	12.4	11.6	11.7	11.1	11.5	9.5	10.4	12.8	12.6	10.9	10.6	10.9	11	10.6	10.9	10.7	10.3	12.6	12.8	12.4	12.5
THC0290_N_0014	18906	19034	1	Region	5prime				new transcription segment	NA(CDS:THC0290_0016)	2616	A361	B138	C39	129	0	0	0	0	-	0	NA	NA	NA	-	6.6	6.4	5.8	5.8	4.9	5.7	5.9	5.4	3.9	6.9	6.1	5.7	3.9	3.9	3.9	4.2	7.8	4	4.1	7.5	6.5	6.7	6.8	6.7
THC0290_0016	19035	21308	1	CDS	NA		THC0290_v2_0016		Probable helicase	NA	2884	A741	B213	C56	2274	0	0	0	0	-	NA	NA	NA	NA	-	9.6	9.5	9.6	9.6	9.7	9.7	10.1	9	10	9.9	9.7	9.6	9	9.1	9.5	9.5	8.7	9.2	7.9	8.5	9.8	9.5	9.6	9.4
THC0290_N_0015	21309	21961	1	Region	3prime				new transcription segment	NA(CDS:THC0290_0016)	58	A1822	B558	C145	653	1	1	0	0	THC0290_N_0016	1	21688,21801,+	0.575	114	LDEIITTSNLGEKAFTTDEAKGKIIRKWSQLFYGRIN	7.5	7.4	7.7	7.6	8	8.5	8.4	9.4	9.1	9.2	7.8	7.6	8.7	7.4	7.8	8.1	4.9	8.4	10	9.9	7.2	7.7	7.3	7.3
THC0290_N_0016	21441	22155	-1	Region	3prime				new transcription segment	NA(CDS:THC0290_0017)	4361	A731	B210	C55	715	1	1	0	0	THC0290_N_0015	1	21798,21851,-	0.998	54	MTTSSINIPVFLKINWY	7.3	7.3	7.3	7.3	7.5	8.3	7.4	9.2	7.2	7.6	7.4	7.5	9.3	8.4	8.2	8	7.1	8	8.5	7.9	7.7	7.8	6.6	6.8
THC0290_0017	22156	22707	-1	CDS	NA		THC0290_v2_0018		Protein of unknown function	NA	4363	A733	B210	C55	552	0	0	0	0	-	NA	NA	NA	NA	-	9.7	9.6	9.8	9.7	10	10.3	9.9	10.6	8.3	9.6	9.6	9.7	10.1	9.9	10.2	10.1	10	10.2	10.4	10.4	9.8	9.9	8.9	9.1
THC0290_N_0017	22708	22762	-1	Region	intra				new transcription segment	NA(CDS:THC0290_0017);NA(CDS:THC0290_0018)	4364	A733	B210	C55	55	0	0	0	0	-	0	NA	NA	NA	-	9.2	9.2	9.3	9.4	9.8	9.9	9.8	10.3	7.7	9.1	9.1	9.5	9.5	9.4	10.1	9.7	9.7	10	9.2	9.4	9.6	9.4	9	9.2
THC0290_0018	22763	23272	-1	CDS	NA		THC0290_v2_0019		Probable cAMP-binding protein	NA	4365	A733	B210	C55	510	0	0	0	0	-	NA	NA	NA	NA	-	10.5	10.5	10.4	10.5	10.9	10.8	10.8	11.2	9.3	9.8	10.4	10.5	10.3	10.4	10.7	10.6	10.4	10.3	10.1	10.1	10.6	10.5	10.1	10.3
THC0290_0019	23309	23692	-1	CDS	NA		THC0290_v2_0020		Probable transmembrane protein of unknown function	NA	4362	A732	B210	C55	384	0	0	0	0	-	NA	NA	NA	NA	-	10.6	10.6	10.7	10.7	11	11.1	10.9	11.5	10.9	10.5	10.6	10.7	10.5	11	10.9	10.7	10.8	10.7	10.8	10.5	10.7	10.8	10.4	10.5
THC0290_0020	23822	24970	-1	CDS	NA	holB	THC0290_v2_0021	holB	Probable DNA polymerase III, delta prime subunit	NA	607	A1567	B528	C143	1149	0	0	0	0	-	NA	NA	NA	NA	-	10.5	10.5	10.4	10.4	10.6	11	10.8	10.9	11.1	11.1	10.6	10.6	11.3	11.2	10.7	10.7	11.3	11.4	11.9	11.7	10.7	10.7	10.1	10
THC0290_N_0018	24970	25238	1	Region	5prime				new transcription segment	NA(Region:THC0290_N_0020)	2055	A1723	B546	C143	269	0	0	0	0	-	0	NA	NA	NA	-	5.3	5.6	6	5.8	6.2	6.3	6.2	6.9	7.5	7.7	5.2	6.1	7.8	8	8.3	7.4	7	6.5	8.9	8	6.1	5.7	5.8	5.2
THC0290_N_0019	25240	25332	1	Region	5prime				new transcription segment	remF(CDS:THC0290_0021)	412	A1244	B419	C125	93	0	0	0	0	-	0	NA	NA	NA	-	12.2	12.5	12.4	12.4	12.2	12.3	11.9	12.6	11.8	12.3	12.5	12.6	12.6	12	12.6	13.1	12	12.3	13.6	13.8	12.4	12.7	11.8	11.5
THC0290_N_0020	25333	25398	1	Region	5prime				new transcription segment	remF(CDS:THC0290_0021)	399	A1254	B420	C125	66	0	0	0	0	-	0	NA	NA	NA	-	5.3	5.5	5.5	5.6	4.6	4.4	4.9	7	6.1	6.7	5.4	5.9	4.2	5.4	6.2	6.3	8.5	6.5	8.2	4	5.3	5.2	4	4.1
THC0290_0021	25399	25836	1	CDS	NA	remF	THC0290_v2_0022	remF	Gliding motility protein RemF precursor	NA	405	A1257	B421	C125	438	0	0	0	0	-	NA	NA	NA	NA	-	13.8	13.9	14.3	14.3	14.4	14.3	13.9	14.7	14.1	13.8	14.3	14.3	13.7	13.5	13.9	14.2	13.3	13.2	14.2	14.5	13.8	14.1	13.4	13.2
THC0290_0022	25871	27163	1	CDS	NA	remG	THC0290_v2_0023	remG	Gliding motility protein RemG precursor	NA	406	A1257	B421	C125	1293	0	0	0	0	-	NA	NA	NA	NA	-	13.9	14.1	14.3	14.5	14.7	14.6	14.4	15	15.3	14.6	14.4	14.4	14.3	13.9	14.4	15	13.6	13.9	15.2	15.2	13.9	14.1	13.4	13.2
THC0290_N_0021	27164	27223	1	Region	intra				new transcription segment	sprC(CDS:THC0290_0023);remG(CDS:THC0290_0022)	402	A1256	B421	C125	60	0	0	0	0	-	0	NA	NA	NA	-	10.9	10.7	10.6	10.8	10.8	10.4	10.6	11.5	11.9	11.4	11.2	11.1	11.2	11.3	11.9	12	11.1	11	11.7	12.1	11.1	10.9	10.2	9.9
THC0290_N_0022	27224	27295	1	Region	intra				new transcription segment	sprC(CDS:THC0290_0023);remG(CDS:THC0290_0022)	403	A1256	B421	C125	72	0	0	0	0	-	0	NA	NA	NA	-	11.2	11.4	11.2	11.4	11.4	11	11.4	11.6	12.2	12	11.4	11.6	11.5	11.6	12.3	12.2	11.6	11.1	12.2	12.5	11.5	11.3	10.8	10.4
THC0290_0023	27296	28729	1	CDS	NA	sprC	THC0290_v2_0024	sprC	Putative adhesin precursor SprC	NA	401	A1256	B421	C125	1434	0	0	0	0	-	NA	NA	NA	NA	-	12.2	12.3	12.4	12.5	12.5	12.6	12.4	11.9	13.3	13.2	12.4	12.5	12.6	12.3	13.1	13.1	12.4	12.4	13	13.4	12.4	12.1	11.6	11.2
THC0290_0024	28731	32459	1	CDS	NA	sprD	THC0290_v2_0025	sprD	Putative cell surface protein precursor SprD	NA	400	A1256	B421	C125	3729	0	0	0	0	-	NA	NA	NA	NA	-	11.8	11.7	12.1	12.1	12.1	12	12.3	11.3	12.5	12.4	12.2	12.3	12	11.4	12.8	13	12.2	12	12.5	12.8	12	11.8	10.9	10.7
THC0290_N_0023	32460	32570	1	Region	3prime				new transcription segment	sprD(CDS:THC0290_0024)	1288	A1747	B546	C143	111	0	0	0	0	-	0	NA	NA	NA	-	5.3	5.6	5.7	5.9	6.8	6.4	8.1	6.8	8.2	8.6	5.5	5.6	11.7	12.1	11	9.6	11.4	10.1	12.4	13.6	6.1	5.2	5.2	5.9
THC0290_0025	32571	43136	1	CDS	NA	sprB	THC0290_v2_0026	sprB	Putative adhesin precursor SprB (modular protein)	NA	2505	A242	B86	C26	10566	0	0	0	0	-	NA	NA	NA	NA	-	12.8	12.7	13.3	13.4	13.7	13.4	13.8	10.9	13.7	13.2	13.3	13.2	12.3	11.7	13.5	13.7	12.7	12.5	12.6	12.8	12.8	12.6	12	11.9
THC0290_N_0024	43137	43182	1	Region	intra				new transcription segment	sprF(CDS:THC0290_0026);sprB(CDS:THC0290_0025)	4472	A744	B215	C56	46	0	0	0	0	-	0	NA	NA	NA	-	4.1	3.9	5.1	3.9	5.7	4.4	4.6	4.1	6.5	4.7	4.7	5.1	3.9	3.9	6.4	6.2	3.9	4.1	3.9	3.9	4	4.1	3.9	3.9
THC0290_0026	43183	44154	1	CDS	NA	sprF	THC0290_v2_0027	sprF	Putative cell surface protein precursor SprF	NA	2506	A242	B86	C26	972	0	0	0	0	-	NA	NA	NA	NA	-	12.4	12.6	13.5	13.5	13.9	13.7	14	11.5	14.1	13.8	13.2	13.4	12.6	11.6	13.6	13.7	12.8	12.8	12.9	12.7	12.7	12.5	11.9	11.8
THC0290_N_0025	44155	44282	1	Region	intra				new transcription segment	pgk(CDS:THC0290_0027);sprF(CDS:THC0290_0026)	2510	A245	B87	C26	128	0	0	0	0	-	0	NA	NA	NA	-	11.1	11.2	12.1	11.7	11.8	11.9	12.1	8.9	12.1	12	11.9	11.9	10.7	11.5	11.8	11.7	10.8	10.9	10.9	10.6	11.4	10.5	10.5	10.5
THC0290_0027	44283	45470	1	CDS	NA	pgk	THC0290_v2_0028	pgk	Phosphoglycerate kinase	NA	2492	A655	B184	C45	1188	0	0	0	0	-	NA	NA	NA	NA	-	12.5	12.4	13	12.9	13.1	12.9	13	10.7	12.5	12.3	12.9	12.7	11.8	11.8	12.1	12.1	12	11.9	11.5	11.2	12.4	11.8	11.8	11.3
THC0290_N_0026	45471	45575	1	Region	intra				new transcription segment	mltD(CDS:THC0290_0028);pgk(CDS:THC0290_0027)	2493	A655	B184	C45	105	0	0	0	0	-	0	NA	NA	NA	-	12.6	12.6	13.2	13.2	13.3	13.2	13	11.7	12.2	12.4	13.3	13.1	12.2	12.1	12	12.1	11.8	12.2	12.4	10.8	12.6	12.5	12	11.6
THC0290_0028	45576	47672	1	CDS	NA	mltD	THC0290_v2_0029	mltD	Membrane-bound lytic murein transglycosylase D precursor	NA	2491	A654	B184	C45	2097	0	0	0	0	-	NA	NA	NA	NA	-	11.9	11.9	12.3	12.3	12.2	12.3	11.8	11.4	10.6	11.1	12.3	12.4	11.5	11.4	11.6	11.6	11.2	11.6	11.6	11.3	11.9	11.9	11	10.9
THC0290_N_0027	47673	47728	1	Region	3prime				new transcription segment	mltD(CDS:THC0290_0028)	456	A1320	B455	C133	56	0	0	0	0	-	0	NA	NA	NA	-	4	3.9	3.9	3.9	3.9	3.9	3.9	6.6	3.9	3.9	3.9	4	3.9	4.1	6.5	3.9	4	3.9	8.6	3.9	3.9	3.9	3.9	3.9
THC0290_0029	47729	48178	1	CDS	NA	elaA	THC0290_v2_0030	elaA	ElaA protein	NA	1756	A1768	B546	C143	450	0	0	0	0	-	NA	NA	NA	NA	-	8.6	8.8	8.9	9.1	10	10.2	10.2	11.6	11	10.7	9	8.9	10.8	11.4	9.9	9.8	11.8	11.2	11.2	11.9	8.8	9	8.7	8.3
THC0290_0030	48175	48993	-1	CDS	NA		THC0290_v2_0031		Probable outer membrane protein precursor, OmpA family	NA	1382	A1757	B546	C143	819	1	1	0	0	THC0290_N_0028	NA	NA	NA	NA	-	7.4	7.5	7.8	7.8	8.1	8.1	7.9	9.3	8.6	8.3	8	8.1	8.9	9.1	7.9	8.1	8.1	8.7	9	9.2	7.2	7.6	7.2	6.9
THC0290_N_0028	48179	48337	1	Region	3prime				new transcription segment	elaA(CDS:THC0290_0029)	208	A1817	B557	C145	159	1	0	1	0	THC0290_0030	0	NA	NA	NA	-	7.5	7.4	7.5	7.6	8.3	8.5	8.7	10.1	9.3	8.8	7.5	7.1	9.2	9.1	7.8	7.7	3.9	8.4	6.4	7.1	7.3	7.6	7.1	6.8
THC0290_N_0029	49141	49425	1	Region	indep	Rfp3			new transcription segment	NA	1438	A1768	B546	C143	285	0	0	0	0	-	0	NA	NA	NA	-	7.7	7.7	7.9	7.7	8.6	9.9	9.1	9.9	9.9	10.3	8.1	8	11.3	10.9	9.5	9.5	11.4	12.1	12.3	11.8	7.2	7.9	8	7.8
THC0290_N_0030	49569	49619	1	Region	5prime				new transcription segment	yceA(CDS:THC0290_0031)	754	A1713	B546	C143	51	0	0	0	0	-	0	NA	NA	NA	-	9.5	9.4	9.6	9.4	10.2	10.7	10.8	11.5	11.9	12.1	9.7	9.7	11.5	11.3	11	10.9	11.9	12.1	12.4	11.1	9.8	9.9	9.2	9.2
THC0290_0031	49620	50978	1	CDS	NA	yceA	THC0290_v2_0032	yceA	Protein of unknown function YceA	NA	755	A1713	B546	C143	1359	0	0	0	0	-	NA	NA	NA	NA	-	10.8	10.7	10.5	10.6	11.4	11.4	11.7	12.2	12.9	12.8	10.6	10.6	11.8	11.9	11.7	11.8	11.8	11.9	12.2	12	10.7	10.9	10.7	10.5
THC0290_N_0031	51080	51148	1	Region	5prime				new transcription segment	fjo17(CDS:THC0290_0032)	2009	A1543	B522	C143	69	0	0	0	0	-	0	NA	NA	NA	-	7.5	7.2	7.4	6.7	7.3	7.6	7.9	7.4	9	9.5	7.4	7.4	8.8	8.9	8.7	8.7	9.8	10.2	11	10.3	7.5	7.7	7.4	7.6
THC0290_0032	51149	52540	1	CDS	NA	fjo17	THC0290_v2_0033	fjo17	Protein of unknown function Fjo17	NA	3688	A443	B166	C44	1392	0	0	0	0	-	NA	NA	NA	NA	-	12.2	12	12.2	12.2	12.1	12	12.1	10.8	11.6	11.8	12.2	12.3	11.4	11.4	11.5	11.3	11.5	11.3	11.5	12.3	12.1	11.8	12.1	12.1
THC0290_0033	52515	53027	1	CDS	NA	gldH	THC0290_v2_0034	gldH	Gliding motility lipoprotein precursor GldH	NA	3405	A595	B183	C44	513	0	0	0	0	-	NA	NA	NA	NA	-	12	12	12.2	12	11.9	11.9	11.6	11.5	10.8	11.3	12.2	12.1	11	10.6	11.2	11.2	10.5	10.6	10.2	10.4	12.1	11.9	11.7	11.9
THC0290_0034	53033	55357	1	CDS	NA	mrcA	THC0290_v2_0035	mrcA	Penicillin-binding protein 1A	NA	2530	A231	B83	C25	2325	0	0	0	0	-	NA	NA	NA	NA	-	12.1	12	12.2	12.2	12	12.2	12.2	10.1	11.5	11.5	12.3	12.2	11	10.5	11.5	11.2	11	10.9	10.5	10.5	12.2	11.6	11.9	12.1
THC0290_N_0032	55358	55525	1	Region	intra				new transcription segment	atoD(CDS:THC0290_0035);mrcA(CDS:THC0290_0034)	2531	A231	B83	C25	168	1	0	0	1	THC0290_flavo-1_0001	0	NA	NA	NA	-	10.3	10.3	10.5	10.4	10.2	10.6	10.8	7.9	10.1	10.3	10.6	10.5	9.8	9.2	10.2	9.8	9.3	9.5	9.6	7.5	10.8	10	10.6	10.6
THC0290_flavo-1_0001	55370	55451	-1	misc_RNA	NA				Flavo-1 RNA	NA	475	A1328	B460	C133	82	1	1	0	0	THC0290_N_0032	NA	NA	NA	NA	-	4	4.1	4	4	4	4.1	4	3.9	3.9	4	3.9	4	4.3	4.7	4.3	3.9	6.5	7.4	8.8	6.4	4.2	3.9	4	4
THC0290_0035	55526	56224	1	CDS	NA	atoD	THC0290_v2_0036	atoD	3-oxoacid CoA-transferase subunit A family protein AtoD	NA	3532	A605	B183	C44	699	0	0	0	0	-	NA	NA	NA	NA	-	12.5	12.4	12.7	12.6	12.2	12.5	12.5	9.4	11.3	11.5	12.8	12.5	10.5	9.6	11	11.1	10.6	10.9	10.3	10.9	12.8	12.3	12.3	12.4
THC0290_0036	56236	59862	1	CDS	NA		THC0290_v2_0037		Probable type I endonuclease-methyltransferase fusion protein	NA	3625	A618	B183	C44	3627	0	0	0	0	-	NA	NA	NA	NA	-	11.9	11.9	12.4	12.1	12.3	12.1	12	11.6	11.3	11.4	12.1	12.5	10.1	10.1	11	11.1	10.5	11.2	10.7	10.9	12.1	11.8	11.6	11.8
THC0290_0037	59864	60520	1	CDS	NA	atoA	THC0290_v2_0038	atoA	3-oxoacid CoA-transferase subunit B family protein AtoA	NA	3624	A618	B183	C44	657	0	0	0	0	-	NA	NA	NA	NA	-	10.9	10.9	11.1	11	11	11.2	10.9	10.2	10.6	10.1	11.2	11.2	8.9	7.7	9.8	10	9.7	10.1	10.3	9	10.8	10.9	10.6	10.7
THC0290_N_0033	60521	60568	1	Region	3prime				new transcription segment	atoA(CDS:THC0290_0037)	2605	A691	B195	C50	48	0	0	0	0	-	0	NA	NA	NA	-	5.6	4.9	4.9	3.9	4.8	6.2	5.1	5.4	3.9	5.2	5.2	4.8	3.9	3.9	3.9	4.2	3.9	3.9	3.9	3.9	5.4	5.2	6	5.7
THC0290_N_0034	60627	61113	-1	Region	3prime				new transcription segment	NA(CDS:THC0290_0038)	2451	A136	B54	C18	487	0	0	0	0	-	0	NA	NA	NA	-	8.2	7.6	7.8	7.9	8	7.9	7.9	8.2	6.8	7.6	8.2	8	7.5	8.1	7.3	6.4	6.2	6.9	8.6	6	7.7	7.8	8.1	7.9
THC0290_0038	61114	62553	-1	CDS	NA		THC0290_v2_0039		Probable transmembrane protein of unknown function	NA	4291	A1797	B550	C143	1440	0	0	0	0	-	NA	NA	NA	NA	-	9	9.1	9.5	9.5	9.6	9.7	9.6	9.6	9.5	9.2	9.6	9.7	9.8	9.8	9.2	9.1	9.8	10.1	9.4	9	9.1	9.2	9.1	9.1
THC0290_N_0035	62567	62668	-1	Region	3prime				new transcription segment	NA(CDS:THC0290_0039)	4402	A722	B206	C54	102	0	0	0	0	-	0	NA	NA	NA	-	7.8	7.9	8.1	8.3	8.3	7.7	8.2	8.6	7.6	6.9	8.2	8.3	6.7	8	7.7	7.3	9.2	8	8.8	9.9	8.1	8	7.8	7.9
THC0290_0039	62669	63382	-1	CDS	NA		THC0290_v2_0040		Protein of unknown function	NA	529	A1799	B551	C143	714	0	0	0	0	-	NA	NA	NA	NA	-	9.4	9.3	10	10.2	10.4	10.6	10.2	10.5	9.7	9.6	10.1	10.2	9.7	10	9.4	9.3	10.4	10	10	11.5	9.3	9.5	9.5	9.2
THC0290_N_0036	63383	63435	-1	Region	5prime				new transcription segment	NA(CDS:THC0290_0039)	530	A1798	B551	C143	53	0	0	0	0	-	0	NA	NA	NA	-	9.2	9.4	10.2	10	10.3	11.2	10.1	10.1	9.7	10.9	10	10.1	10.9	9.7	9.2	9.5	10.4	11.7	12.3	10.9	9.1	9.2	9.3	9.1
THC0290_0040	63488	63958	-1	CDS	NA	ogt1	THC0290_v2_0041	ogt1	Methylated-DNA--[protein]-cysteine S-methyltransferase	NA	4527	A1021	B328	C90	471	0	0	0	0	-	NA	NA	NA	NA	-	8.5	8.4	8.5	8.2	7.9	8.2	7.5	6.6	7.8	8	8.6	8.5	8.6	8.8	8	7.8	8.4	8.3	8.8	8.6	8.9	8.3	8.7	8.6
THC0290_N_0037	64013	64179	-1	Region	indep	Rfp4			new transcription segment	NA	4504	A699	B199	C52	167	0	0	0	0	-	0	NA	NA	NA	-	11.6	11.8	11.6	11.6	11	11.9	10.8	11.6	10.8	11.4	11.1	11	12.7	11.9	12.8	13.2	9.9	11	12.6	10.8	11.7	11.7	11.9	11.8
THC0290_0041	64242	64637	-1	CDS	NA		THC0290_v2_0042		Cytochrome c551/c552 family protein	NA	4514	A700	B199	C52	396	0	0	0	0	-	NA	NA	NA	NA	-	10.6	10.7	10.6	10.4	9.9	10.2	9.5	9.2	8	7.9	10	10.3	11.5	10.5	12	12.2	8.5	8.3	8.8	10.2	10.8	10.6	10.7	10.9
THC0290_N_0038	64654	64878	-1	Region	intra				new transcription segment	NA(CDS:THC0290_0041);hemB(CDS:THC0290_0042)	3346	A601	B183	C44	225	0	0	0	0	-	0	NA	NA	NA	-	11.6	11.6	10.6	10.6	10.6	10.7	10.2	9.3	8.3	7.7	10.2	10	7.5	5.3	7.3	7.5	4	8.4	10.5	7.3	11.8	11.2	11.6	11.7
THC0290_0042	64879	65871	-1	CDS	NA	hemB	THC0290_v2_0043	hemB	Porphobilinogen synthase	NA	3270	A588	B183	C44	993	0	0	0	0	-	NA	NA	NA	NA	-	11.2	11.3	10.3	10.4	10.2	10	10.2	8.2	8.2	7.6	9.8	9.8	4.5	4	6.7	7.3	7	5.7	4.4	4.5	11.5	10.8	11.3	11.3
THC0290_0043	65876	66910	-1	CDS	NA		THC0290_v2_0044		Protein of unknown function	NA	3268	A588	B183	C44	1035	0	0	0	0	-	NA	NA	NA	NA	-	10.3	10.2	9.3	9.2	9.3	9.2	9.2	8.3	7.8	7.5	8.9	8.9	7.4	5.2	5.9	7.4	7.6	6.4	6.1	6.5	10.6	10.4	10	10.4
THC0290_0044	66918	67820	-1	CDS	NA	hemF	THC0290_v2_0045	hemF	Coproporphyrinogen oxidase	NA	3269	A588	B183	C44	903	0	0	0	0	-	NA	NA	NA	NA	-	11.6	11.8	10.7	10.9	11.2	11	11.2	9.5	10.2	9.7	10.5	10.7	9.1	8.4	9.5	9.3	9.2	9.2	8.6	8.4	11.8	11.7	11.7	11.9
THC0290_0045	67822	68385	-1	CDS	NA		THC0290_v2_0046		Protein of unknown function precursor	NA	3267	A588	B183	C44	564	0	0	0	0	-	NA	NA	NA	NA	-	11.5	11.6	10.6	10.8	11	11	11.1	10.4	10.2	9.8	10.3	10.5	9.4	9	9.3	9.6	9.5	9.5	9.5	7.1	11.7	11.5	11.6	11.6
THC0290_0046	68389	68934	-1	CDS	NA		THC0290_v2_0047		Probable ribosomal-protein-amino-adic N-acetyltransferase	NA	3273	A588	B183	C44	546	0	0	0	0	-	NA	NA	NA	NA	-	11.7	11.7	10.5	10.6	11.1	10.8	10.8	11	8.6	9.8	10.3	10.2	8.8	8.6	9.2	9.2	9.4	9	9.6	9.8	11.7	11.8	11.8	11.9
THC0290_0047	68944	69930	-1	CDS	NA		THC0290_v2_0048		Hypothetical lipoprotein precursor	NA	3274	A588	B183	C44	987	1	1	0	0	THC0290_N_0039	NA	NA	NA	NA	-	11.9	12	10.9	11.1	11.5	10.9	11.1	10.9	9.4	9.5	10.5	10.4	8.5	8.6	9.2	9.2	9.6	9.6	9.4	9.1	12	11.8	12	12
THC0290_N_0039	69429	69507	1	Region	indep	Rfp5			new transcription segment	NA	1271	A1768	B546	C143	79	1	0	1	0	THC0290_0047	0	NA	NA	NA	-	4.5	4	5.2	4	4.9	6.1	6.2	9.2	7.7	7.8	4.8	5.5	9.2	9.6	8.3	8.8	11.2	10.6	11.6	12.8	3.9	5.7	4	4
THC0290_0048	69952	70974	-1	CDS	NA	hemE	THC0290_v2_0049	hemE	Uroporphyrinogen decarboxylase	NA	3271	A588	B183	C44	1023	0	0	0	0	-	NA	NA	NA	NA	-	11.6	11.7	10.8	11	11.4	10.8	11.4	9	10.1	9.7	10.3	10.1	7.7	7.2	9.1	9.3	7.5	7.9	7.8	8.5	12	11.3	11.8	11.9
THC0290_N_0040	70975	71053	-1	Region	intra				new transcription segment	hemE(CDS:THC0290_0048);hemD(CDS:THC0290_0049)	3266	A588	B183	C44	79	0	0	0	0	-	0	NA	NA	NA	-	10.6	10.6	9.6	9.9	10.3	10.5	10.4	9.2	9.6	9.7	9.2	9.1	7.2	7.9	8.9	8.6	9.6	8.1	3.9	9.9	10.9	10.6	10.7	10.7
THC0290_0049	71054	71716	-1	CDS	NA	hemD	THC0290_v2_0050	hemD	Uroporphyrinogen-III synthase	NA	3272	A588	B183	C44	663	0	0	0	0	-	NA	NA	NA	NA	-	11.3	11.1	10.3	10.2	11	11.2	11.1	10.9	9.8	10.1	9.5	9.6	8.8	7.9	9.1	9.2	8.4	8.5	8.2	8.7	11.5	11.4	11	11.3
THC0290_0050	71716	72642	-1	CDS	NA	hemC	THC0290_v2_0051	hemC	Hydroxymethylbilane synthase	NA	2474	A110	B46	C16	927	0	0	0	0	-	NA	NA	NA	NA	-	11	11.1	10.1	10.1	10.9	11	11.2	10	10.9	10.9	9.4	9.6	9.5	9.9	9.7	9.7	9.8	9.6	9.6	9.9	11.4	10.9	11	11.1
THC0290_N_0041	72643	72710	-1	Region	intra				new transcription segment	hemC(CDS:THC0290_0050);hemA(CDS:THC0290_0051)	2475	A111	B46	C16	68	0	0	0	0	-	0	NA	NA	NA	-	10.4	10.3	9.3	9.5	10.4	11	10.9	10.3	10.7	11.2	8.9	9.1	9.9	9.8	10.1	9.8	10.3	9.7	9.7	8	10.7	10.2	10.2	10.3
THC0290_0051	72711	73952	-1	CDS	NA	hemA	THC0290_v2_0052	hemA	Glutamyl-tRNA reductase	NA	2476	A111	B46	C16	1242	0	0	0	0	-	NA	NA	NA	NA	-	11.7	11.6	10.9	11.1	12.2	12.1	12.5	12.3	12.9	12.8	10.4	10.6	12	11.8	11.7	11.8	11.6	11.5	11.6	11.9	11.8	11.7	11.6	11.4
THC0290_N_0042	74099	74180	1	Region	5prime				new transcription segment	NA(CDS:THC0290_0052)	1148	A1709	B546	C143	82	0	0	0	0	-	0	NA	NA	NA	-	8.3	8.3	7.7	7.6	8.9	10.5	9.5	10.3	9.9	11.5	7.6	7.7	11.8	11.3	10.2	10.1	10.8	12.3	13.1	11.4	8.1	8.4	8.1	8
THC0290_0052	74181	75047	1	CDS	NA		THC0290_v2_0053		Probable transcriptional regulator, AraC family	NA	753	A1712	B546	C143	867	0	0	0	0	-	NA	NA	NA	NA	-	9.9	9.9	9	9.1	10.3	10	11	10.8	11.5	11.3	8.8	9.1	11.1	11.6	11.3	11.2	11.4	11	11.4	11.7	9.9	10	10	9.9
THC0290_0053	75051	76070	1	CDS	NA	hemH	THC0290_v2_0054	hemH	Ferrochelatase	NA	31	A1096	B368	C108	1020	0	0	0	0	-	NA	NA	NA	NA	-	11	10.9	10.3	10.6	11.7	11.5	12.4	11	12.2	11.9	10.2	10.2	11.1	11.2	11.6	11.4	11.1	11.1	11.1	11.2	11.1	10.5	11	11.1
THC0290_0054	76103	76645	1	CDS	NA		THC0290_v2_0055	hemJ	Protoporphyrinogen IX oxidase	NA	32	A1097	B368	C108	543	0	0	0	0	-	NA	NA	NA	NA	-	10.9	10.8	10.2	10.5	11.7	11.5	12.2	12.3	11.4	11	9.9	10	10.3	10.2	11	11.1	10.1	10.3	10.3	9.7	10.9	10.5	10.7	10.6
THC0290_0055	76646	78121	1	CDS	NA		THC0290_v2_0056		Two-component system sensor histidine kinase	NA	29	A1094	B368	C108	1476	0	0	0	0	-	NA	NA	NA	NA	-	10.4	10.1	9.5	9.6	10.7	10.9	11.4	11.1	10.2	10	9.3	9.3	9.6	9.2	10.2	10.2	9.7	9.9	10.1	9.7	10.2	9.8	9.8	10
THC0290_0056	78125	78907	1	CDS	NA	crt	THC0290_v2_0057	crt	Probable 3-hydroxybutyryl-CoA dehydratase	NA	30	A1095	B368	C108	783	1	1	0	0	THC0290_N_0043	NA	NA	NA	NA	-	11	11	10.8	10.9	11.7	11.8	12.2	11.9	12	11.6	10.7	10.7	10.4	10.1	11.1	11.3	10.7	11	11.4	11	11	11	11	11
THC0290_N_0043	78654	78915	-1	Region	3prime				new transcription segment	NA(CDS:THC0290_0057)	364	A1648	B540	C143	262	1	0	1	0	THC0290_0056	0	NA	NA	NA	-	4.9	4.8	4.3	4.8	4.8	6	5.9	8.1	6.6	7.1	4.7	4.5	6.3	6.7	6.9	5.7	6.5	6.5	7.6	3.9	5	4.5	4.4	4.4
THC0290_N_0044	78908	78989	1	Region	3prime				new transcription segment	crt(CDS:THC0290_0056)	4349	A177	B64	C20	82	1	0	1	0	THC0290_0057	0	NA	NA	NA	-	5.9	5.9	5.5	5.7	6.6	7.2	7.1	8	6.2	7.3	5.8	5.3	7.1	3.9	5.7	5.8	3.9	3.9	8.7	3.9	5.5	5.8	5	5.4
THC0290_0057	78916	79563	-1	CDS	NA		THC0290_v2_0058		Probable hydrolase	NA	3787	A918	B285	C78	648	2	2	0	0	THC0290_N_0044;THC0290_N_0045	NA	NA	NA	NA	-	8.7	8.7	8.4	8.4	8.2	8	8.4	8.8	9.2	9.4	8.4	8.4	9.9	10	10.1	9.9	9.2	9.4	7.9	8.1	8.7	8.6	9	8.5
THC0290_N_0045	78990	79546	1	Region	3prime-PT				new transcription segment	NA	2396	A209	B77	C25	557	1	0	1	0	THC0290_0057	0	NA	NA	NA	-	7.4	7.1	7	7.2	8.1	8.4	8.9	9	7.9	7.6	7	6.8	6.5	3.9	7.2	7.8	4.1	7	5.7	3.9	7.3	7.3	6.8	6.9
THC0290_N_0046	79564	79634	-1	Region	intra				new transcription segment	NA(CDS:THC0290_0057);NA(CDS:THC0290_0058)	3788	A918	B285	C78	71	0	0	0	0	-	0	NA	NA	NA	-	8.4	8.3	8.1	7.9	7.7	7.7	8.2	8	8.7	9	8.1	8	9.4	9.7	9.8	9.7	8.8	9.2	7.1	8.7	8.3	8	8.7	8.3
THC0290_0058	79635	80624	-1	CDS	NA		THC0290_v2_0059		Putative acyl-[acyl-carrier-protein] desaturase	NA	2269	A941	B297	C82	990	0	0	0	0	-	NA	NA	NA	NA	-	11.6	11.7	11.6	11.5	11.9	11.8	12.1	11.1	12.2	12.3	11.4	11.3	12	12	12.2	12	12.1	11.9	11.6	11.4	11.7	11.5	12	11.7
THC0290_0059	80660	81394	-1	CDS	NA	plsC	THC0290_v2_0060	plsC	1-acylglycerol-3-phosphate O-acyltransferase	NA	2270	A941	B297	C82	735	0	0	0	0	-	NA	NA	NA	NA	-	11	11.1	11	11	11.8	11.8	12.7	11.2	12.8	13.1	10.4	10.5	12.4	12.3	12.6	12.6	12.3	12.3	12.1	11.9	10.9	10.4	11.5	10.8
THC0290_N_0047	81395	81474	-1	Region	3prime				new transcription segment	yqiW(CDS:THC0290_0060)	2271	A941	B297	C82	80	0	0	0	0	-	0	NA	NA	NA	-	6.7	7	7.1	7	7.5	7.6	8.8	7.1	9.1	9	6.3	6	9.7	9.7	9.7	9.5	8.1	8.9	9.2	6.2	7.2	5.9	7.7	7.1
THC0290_0060	81475	81885	-1	CDS	NA	yqiW	THC0290_v2_0061	yqiW	Protein of unknown function YqiW	NA	1295	A1768	B546	C143	411	0	0	0	0	-	NA	NA	NA	NA	-	12.2	12.1	12.2	12.3	12.5	13.1	12.9	12.1	13.4	14.1	12.2	12.1	15.7	15.1	14.3	14	15.3	15.2	15.3	15	12.2	12.6	12.5	12.7
THC0290_N_0048	81912	82047	-1	Region	intra				new transcription segment	yqiW(CDS:THC0290_0060);NA(CDS:THC0290_0061)	3153	A629	B183	C44	136	0	0	0	0	-	0	NA	NA	NA	-	10.4	10.2	9.7	9.7	9.5	9.5	9.5	10.7	9.6	9.7	9.9	9.7	8.6	8.6	8.9	9.2	7.1	8.4	8.7	7.1	10.3	10.4	10.1	10.2
THC0290_0061	82048	82737	-1	CDS	NA		THC0290_v2_0062		Hydrolase, haloacid dehalogenase family protein	NA	3154	A629	B183	C44	690	0	0	0	0	-	NA	NA	NA	NA	-	11.2	11.2	10.9	11	10.9	10.8	10.9	11.5	10.6	10.3	11	10.9	9.5	9.7	9.9	10.1	9.3	9.6	9.6	9.6	11.2	11.2	11.1	11.1
THC0290_N_0049	82738	82791	-1	Region	intra				new transcription segment	NA(CDS:THC0290_0061);metG(CDS:THC0290_0062)	2951	A451	B168	C44	54	0	0	0	0	-	0	NA	NA	NA	-	8.4	8	8	7.9	7.9	8	7.9	8.3	8.3	8.3	8.1	7.7	6.2	6.3	7.5	7.4	3.9	7.2	6.3	4	8.3	8.2	8.3	8.5
THC0290_0062	82792	84852	-1	CDS	NA	metG	THC0290_v2_0063	metG	Methionine--tRNA ligase	NA	3182	A587	B183	C44	2061	0	0	0	0	-	NA	NA	NA	NA	-	11.9	11.8	11.7	11.6	11.5	11.4	11.6	10.8	11.6	11.3	11.7	11.6	10.3	10.3	10.7	10.8	10.3	10.4	10.5	10.7	11.9	11.8	12	11.8
THC0290_flavo-1_0002	84933	85012	-1	misc_RNA	NA				Flavo-1 RNA	NA	1218	A1765	B546	C143	80	0	0	0	0	-	NA	NA	NA	NA	-	5.6	6.1	6.1	5.8	6.1	6.1	6.3	6.4	8	7.3	6	5.9	8.1	8.4	7.5	6.6	10.1	8.8	9.7	10.9	5.9	5.8	5.6	5.9
THC0290_0063	85173	85406	1	CDS	NA		THC0290_v2_0064		Hypothetical protein	NA	1636	A1768	B546	C143	234	0	0	0	0	-	NA	NA	NA	NA	-	11.8	11.9	12.1	12.2	12.5	13.5	12.5	14.1	12.7	13.6	12.1	12.1	14.5	14	12.8	12.7	14.7	15.6	15.3	14.7	11.8	12.2	11.5	11.5
THC0290_0064	85412	86431	1	CDS	NA		THC0290_v2_0065		Probable transmembrane protein of unknown function	NA	74	A1302	B443	C129	1020	0	0	0	0	-	NA	NA	NA	NA	-	11.5	11.6	11.3	11.3	11.6	11.5	11.3	12.4	10.9	11	11.2	11.4	11.7	12.4	11.4	11.4	11.7	11.5	11.6	12	11.4	11.9	10.6	10.4
THC0290_0065	86458	87414	1	CDS	NA		THC0290_v2_0066		Putative carboxypeptidase	NA	4263	A999	B318	C86	957	0	0	0	0	-	NA	NA	NA	NA	-	10	10.1	10	10.1	10	9.6	9.9	9.7	8.7	8.3	10.1	9.9	9.1	9.4	8.8	8.7	9.5	9.5	9.7	10.3	10.1	10	9.4	9.3
THC0290_N_0050	87415	87513	1	Region	intra				new transcription segment	NA(CDS:THC0290_0066);NA(CDS:THC0290_0065)	174	A1824	B558	C145	99	0	0	0	0	-	0	NA	NA	NA	-	7.4	7.4	7.6	7.4	7.6	8.2	8.3	9	7.5	7.7	7.7	7.9	8.3	7.7	7.6	7.2	3.9	7.7	8.9	7.4	7	7.5	6.6	6.9
THC0290_0066	87514	87873	1	CDS	NA		THC0290_v2_0067		Protein of unknown function	NA	2442	A125	B52	C18	360	0	0	0	0	-	NA	NA	NA	NA	-	8.5	8.5	8.3	8.4	8.5	8.7	8.2	9.6	7.3	6.8	8.3	8.2	7.9	7.7	7.4	6.7	4	4.6	7.2	8.4	8.3	8.6	7.6	7.8
THC0290_0067	87874	88914	-1	CDS	NA	tas	THC0290_v2_0068	tas	Oxidoreductase Tas, aldo/keto reductase family	NA	2960	A510	B179	C44	1041	1	1	0	0	THC0290_N_0051	NA	NA	NA	NA	-	9.7	9.4	9.3	9.3	9	8.8	8.9	9.1	9.2	9.3	9.5	9.4	9.3	9	9.3	9.1	8.3	8.4	7.7	6.6	9.7	9.6	9.8	9.9
THC0290_N_0051	87874	88509	1	Region	3prime				new transcription segment	NA(CDS:THC0290_0066)	2439	A130	B53	C18	636	1	0	1	0	THC0290_0067	0	NA	NA	NA	-	7.8	8	7.5	7.7	7.8	7.7	7.5	8.6	6.9	7.1	7.6	7.4	5.8	6.4	6.2	5.7	5.1	4	4.3	3.9	7.9	7.8	7.5	7.2
THC0290_N_0052	89003	89047	-1	Region	3prime				new transcription segment	NA(CDS:THC0290_0068)	-1	NA	NA	NA	45	0	0	0	0	-	0	NA	NA	NA	-	NA	NA	NA	NA	NA	NA	NA	NA	NA	NA	NA	NA	NA	NA	NA	NA	NA	NA	NA	NA	NA	NA	NA	NA
THC0290_0068	89048	90010	-1	CDS	NA		THC0290_v2_0069		Flagellar motor/Chemotaxis (MotB)-related lipoprotein precursor	NA	3690	A446	B166	C44	963	0	0	0	0	-	NA	NA	NA	NA	-	13.2	13	13.2	13.1	12.6	13.1	12.6	11.1	12.2	12.1	13.4	13.4	12	11.4	12.2	12.3	11.8	12.1	12.2	11.9	13	13.1	12.9	13.1
THC0290_N_0053	90011	90080	-1	Region	intra				new transcription segment	NA(CDS:THC0290_0068);xth(CDS:THC0290_0069)	3691	A446	B166	C44	70	0	0	0	0	-	0	NA	NA	NA	-	13.4	13.5	13.9	13.6	13	13.2	12.8	10.3	12.8	13	13.9	13.9	13.1	12.2	12.6	12.5	12.3	12.6	13.6	12.8	13.5	13.4	13.5	13.4
THC0290_0069	90081	90842	-1	CDS	NA	xth	THC0290_v2_0070	xth	Exodeoxyribonuclease III	NA	3694	A605	B183	C44	762	0	0	0	0	-	NA	NA	NA	NA	-	12	12.1	12.3	12.2	11.5	11.7	11.3	9.5	11	11	12.4	12.3	10.7	10.9	10.2	10	10.8	10.7	10.9	10.9	12.1	11.7	12.3	12
THC0290_0070	91039	92844	1	CDS	NA		THC0290_v2_0071		Putative hemolysin	NA	2981	A547	B181	C44	1806	0	0	0	0	-	NA	NA	NA	NA	-	12.2	12	11.6	11.7	11.7	11.3	11.5	11.6	11.1	11	12	12	11.3	11.3	11.4	11.4	10.8	11	10.5	10.7	12	12.3	12	12
THC0290_N_0054	92845	92883	1	Region	3prime				new transcription segment	NA(CDS:THC0290_0070)	-1	NA	NA	NA	39	0	0	0	0	-	0	NA	NA	NA	-	NA	NA	NA	NA	NA	NA	NA	NA	NA	NA	NA	NA	NA	NA	NA	NA	NA	NA	NA	NA	NA	NA	NA	NA
THC0290_N_0055	92909	92951	-1	Region	indep	Rfp6			new transcription segment	NA	-1	NA	NA	NA	43	0	0	0	0	-	0	NA	NA	NA	-	NA	NA	NA	NA	NA	NA	NA	NA	NA	NA	NA	NA	NA	NA	NA	NA	NA	NA	NA	NA	NA	NA	NA	NA
THC0290_0071	93117	94103	-1	CDS	NA		THC0290_v2_0072		Putative phosphoglycerate dehydrogenase	NA	4204	A1052	B346	C102	987	0	0	0	0	-	NA	NA	NA	NA	-	11	11	11.6	11.5	11.6	11.8	11.7	9.5	11.4	11.3	11.8	11.6	11.9	11.6	10.9	10.7	12.1	12.1	11.9	12.4	11.1	10.6	11	10.8
THC0290_N_0056	94104	94163	-1	Region	5prime				new transcription segment	NA(CDS:THC0290_0071)	536	A1430	B497	C142	60	0	0	0	0	-	0	NA	NA	NA	-	10	10	10.1	9.9	9.5	10.6	9.8	8.1	9.9	11	10.3	9.8	11.4	10.3	9.6	9.2	11.4	12.2	12.7	12	10.1	9.6	10	10
THC0290_N_0057	94165	94365	-1	Region	3prime				new transcription segment	proC(CDS:THC0290_0072)	3301	A601	B183	C44	201	1	0	0	1	THC0290_flavo-1_0003	0	NA	NA	NA	-	8.8	8.6	8.4	8.5	8.5	9.4	8.9	6.1	7.1	7.1	8.9	8.1	5.7	5.5	6.9	6.3	7	5	6.9	3.9	8.9	8.2	8.7	9
THC0290_flavo-1_0003	94258	94338	1	misc_RNA	NA				Flavo-1 RNA	NA	1308	A1747	B546	C143	81	1	1	0	0	THC0290_N_0057	NA	NA	NA	NA	-	6.6	6.7	6.6	7.1	7	6.6	7	5.9	8.5	7.1	6.7	6.8	6.7	9.4	8.3	7.6	10.4	8.6	10.3	11.9	7	7	7.1	7.4
THC0290_0072	94366	95142	-1	CDS	NA	proC	THC0290_v2_0073	proC	Pyrroline-5-carboxylate reductase	NA	3533	A605	B183	C44	777	0	0	0	0	-	NA	NA	NA	NA	-	12.3	12.3	12.8	12.6	11.9	12.3	11.8	8.8	11	10.9	12.9	12.2	10.2	9.6	10.5	10.1	10.2	10.4	10.1	10.2	12.8	11.8	12.4	12.5
THC0290_0073	95153	96502	-1	CDS	NA	mgtE	THC0290_v2_0074	mgtE	Mg2+ transporter MgtE	NA	3207	A598	B183	C44	1350	0	0	0	0	-	NA	NA	NA	NA	-	12.4	12.3	12.6	12.5	11.9	12	11.5	10.4	11.2	11.1	12.5	12.4	11	10.6	10.8	10.8	10.6	10.9	10.2	10.2	12.4	11.9	12.5	12.4
THC0290_0074	96492	97271	-1	CDS	NA	ksgA	THC0290_v2_0075	ksgA	Dimethyladenosine transferase	NA	3208	A598	B183	C44	780	0	0	0	0	-	NA	NA	NA	NA	-	11.9	12	12.1	12.2	11.5	11.6	10.9	10.5	10	10.1	12.2	12.2	10.6	10.2	10.6	10.5	10.2	10	9.7	9.5	11.7	11.1	12.4	12.1
THC0290_N_0058	97272	97344	-1	Region	intra				new transcription segment	ksgA(CDS:THC0290_0074);NA(CDS:THC0290_0075)	3216	A598	B183	C44	73	0	0	0	0	-	0	NA	NA	NA	-	10.9	11.2	11.9	11.8	11.1	10.4	10.1	10.7	9.6	9.5	11.5	11.8	9.9	9.9	10.5	10.3	10	9.2	8.7	7	11.1	10.7	11.8	11.3
THC0290_0075	97345	97656	-1	CDS	NA		THC0290_v2_0076		Protein of unknown function	NA	3586	A486	B172	C44	312	0	0	0	0	-	NA	NA	NA	NA	-	11.4	11.7	11.8	11.7	11	11	10.5	10.7	9.9	10.3	11.7	11.7	10.6	11	10.7	10.6	11.1	10.4	10.7	11	11.3	10.9	11.8	11.5
THC0290_N_0059	97657	97728	-1	Region	intra				new transcription segment	NA(CDS:THC0290_0075);NA(CDS:THC0290_0076)	2485	A352	B131	C36	72	0	0	0	0	-	0	NA	NA	NA	-	6.6	6.8	7.3	7.2	6.9	7.4	6.8	7.9	5.9	7.1	7.4	7.4	7.2	3.9	7.1	6.1	5.8	7.5	3.9	6.5	7	6.7	7	6.9
THC0290_0076	97729	99507	-1	CDS	NA		THC0290_v2_0077		Tetratricopeptide repeat domain protein precursor	NA	2892	A485	B172	C44	1779	0	0	0	0	-	NA	NA	NA	NA	-	10.2	10.4	10.5	10.4	10	10	9.9	10.4	9.3	9.5	10.7	10.6	10.3	10.4	10.4	10.2	9.9	10.2	9.9	9.1	10.3	10.1	10.1	10.1
THC0290_N_0060	99508	99741	-1	Region	intra				new transcription segment	NA(CDS:THC0290_0076);serS(CDS:THC0290_0077)	3587	A486	B172	C44	234	0	0	0	0	-	0	NA	NA	NA	-	12	12.2	12.4	12.3	11.7	11.8	11.2	11.6	10.4	10.7	12.3	12.4	11.2	11.2	11.2	11.1	10.7	11.2	11.2	11.2	12.1	11.8	12.3	12
THC0290_0077	99742	101013	-1	CDS	NA	serS	THC0290_v2_0078	serS	Serine--tRNA ligase	NA	2896	A484	B172	C44	1272	0	0	0	0	-	NA	NA	NA	NA	-	13.3	13.5	13.9	14	13.9	13.8	13.8	13.5	13.2	13.3	13.7	13.9	12.1	11.6	12.7	12.8	11.4	11.6	11.9	11.4	13.3	12.7	13.6	13.1
THC0290_N_0061	101014	101224	-1	Region	intra				new transcription segment	serS(CDS:THC0290_0077);NA(CDS:THC0290_0078)	2897	A484	B172	C44	211	0	0	0	0	-	0	NA	NA	NA	-	13.2	13.3	13.6	13.7	13.5	13.5	13.2	13.3	12.6	12.6	13.6	13.7	11.7	11.6	12.3	12.6	11.1	11.4	11.7	10.9	12.9	12.4	13.3	12.8
THC0290_0078	101225	102457	-1	CDS	NA		THC0290_v2_0079		Protein of unknown function precursor	NA	2894	A484	B172	C44	1233	0	0	0	0	-	NA	NA	NA	NA	-	13.5	13.8	14.2	14.2	14.2	14.3	14.3	12.8	13.6	13.8	14.2	14.2	12.5	12	13.1	13.2	12	12.1	12.2	11.7	13.4	12.3	14.2	13.4
THC0290_0079	102454	102894	-1	CDS	NA		THC0290_v2_0080		Protein of unknown function	NA	2895	A484	B172	C44	441	0	0	0	0	-	NA	NA	NA	NA	-	13.9	14.2	14.5	14.5	14.6	14.7	14.8	13.8	14.3	14.2	14.4	14.3	13	12.9	13.6	13.7	12.4	12.4	12.6	12.6	13.7	12.9	14.5	14
THC0290_0080	102896	104074	-1	CDS	NA		THC0290_v2_0081		Probable lipoprotein precursor	NA	2893	A484	B172	C44	1179	0	0	0	0	-	NA	NA	NA	NA	-	13.8	14.1	14.5	14.6	14.6	14.9	14.7	12.9	14.5	14.6	14.3	14.3	13.4	13.1	13.7	13.7	12.4	12.5	12.7	12.5	13.7	12.6	14.4	13.6
THC0290_0081	104165	106036	1	CDS	NA	mntH	THC0290_v2_0082	mntH	Probable manganese transport protein mntH	NA	4132	A1089	B366	C107	1872	0	0	0	0	-	NA	NA	NA	NA	-	11.8	11.9	12.5	12.7	13.2	13.2	13.4	12.6	13.9	13.3	12.5	12.5	12.2	12.4	13	13.2	12.1	11.8	12.6	12.9	11.5	11.5	12.2	11.8
THC0290_N_0062	106037	106329	1	Region	intra				new transcription segment	sirR(CDS:THC0290_0082);mntH(CDS:THC0290_0081)	4133	A1090	B366	C107	293	0	0	0	0	-	1	106195,106239,+	0.811	45	MTNCMFFYPSKFKL	10.9	11.2	11.8	12	12.4	12.7	12.4	12	11.8	12.2	11.8	11.9	12.3	11.4	11.9	12	11.3	11.8	12.6	12.2	11	11.2	11.4	11.2
THC0290_0082	106330	106983	1	CDS	NA	sirR	THC0290_v2_0083	sirR	Probable metal-dependent transcriptional regulator	NA	4346	A1072	B359	C105	654	0	0	0	0	-	NA	NA	NA	NA	-	11.2	11	11.7	11.7	12.1	12.5	12.2	12.4	11.6	11.3	12	11.9	10.8	10.7	11.6	11.8	10.7	11	11	10.3	10.8	11.1	11.2	11.1
THC0290_N_0063	106984	108354	1	Region	repeated_region				new transcription segment	NA	4296	A736	B211	C55	1371	1	0	1	0	THC0290_0083	1	107294,107386,+	0.996	93	MTTSSINIPVFFKAKLVLMPFYYPILGLLL	9.5	9.6	10.3	10.4	10.5	10.5	10.7	9.5	9.1	8.9	10.5	10.4	9.3	9.2	9.9	9.9	10.1	10	10	10.1	9.3	9.1	9.6	9.8
THC0290_0083	107603	108094	-1	CDS	NA		THC0290_v2_0084		Protein of unknown function precursor	NA	3867	A1442	B502	C142	492	1	1	0	0	THC0290_N_0063	NA	NA	NA	NA	-	8.7	8.7	8.7	8.6	8.1	8.4	8.8	7.2	8.9	8.8	8.7	8.5	9.7	9.8	9.1	8.3	9.9	9.6	9.1	9.3	9.2	8.3	8.6	8.9
THC0290_flavo-1_0004	108152	108231	1	misc_RNA	NA				Flavo-1 RNA	NA	4295	A735	B211	C55	80	0	0	0	0	-	NA	NA	NA	NA	-	9.3	9.1	9.8	9.9	9.8	9.5	10.2	7.8	9.4	8.6	10	9.9	9.4	10.3	10.1	9.9	11.2	10	10.4	11.8	9.1	8.7	9.2	9.5
THC0290_0084	108355	108948	1	CDS	NA		THC0290_v2_0085		Protein of unknown function	NA	4297	A736	B211	C55	594	0	0	0	0	-	NA	NA	NA	NA	-	9.2	9.3	10.1	10.3	10.3	9.8	10.3	9.9	8.8	8.7	10.4	10.3	9.1	8.6	9.7	10	8.6	9.4	9.7	9.6	9	8.9	9.5	9.7
THC0290_N_0064	108949	109046	1	Region	3prime				new transcription segment	NA(CDS:THC0290_0084)	2097	A1800	B551	C143	98	1	1	0	0	THC0290_N_0065	0	NA	NA	NA	-	10	10	11.2	11.3	11.6	12.4	11.3	12.4	10.8	10.9	11.5	11	11.8	11.5	11.3	11.3	12.6	11.7	12.2	13.1	9.6	9.8	10.4	10.4
THC0290_N_0065	109009	109056	-1	Region	3prime-PT				new transcription segment	NA	-1	NA	NA	NA	48	1	1	0	0	THC0290_N_0064	0	NA	NA	NA	-	NA	NA	NA	NA	NA	NA	NA	NA	NA	NA	NA	NA	NA	NA	NA	NA	NA	NA	NA	NA	NA	NA	NA	NA
THC0290_tRNA_0002	109057	109130	-1	tRNA	NA				transfer RNA-Asn	NA	1648	A1769	B546	C143	74	0	0	0	0	-	NA	NA	NA	NA	-	9.3	9	9.8	10	10.1	12.4	11.1	14.2	12.8	14.5	9.8	9.9	14.5	13.4	12.7	11.6	14.7	15.1	15.6	15.3	9.5	9.3	9	9.2
THC0290_N_0066	109131	109277	-1	Region	5prime				new transcription segment	NA(Region:THC0290_N_0065)	693	A1361	B469	C136	147	0	0	0	0	-	0	NA	NA	NA	-	9.2	9.1	9.1	9.4	9.1	9.6	9.3	9.8	9.9	10.2	9.2	9.1	10.8	10.8	10.1	9.9	9.9	10	10.3	8.7	9.2	9.4	9.5	9.5
THC0290_0085	109278	110612	-1	CDS	NA		THC0290_v2_0086		Probable M50 family membrane-associated zinc metalloprotease	NA	384	A1265	B422	C125	1335	0	0	0	0	-	NA	NA	NA	NA	-	11.5	11.5	11.5	11.4	11.3	11.2	11	11.1	10.8	11.2	11.4	11.4	11.9	11.9	11.7	11.5	11.4	11.5	11.5	11.5	11.4	11.6	11.8	11.8
THC0290_N_0067	110638	110698	-1	Region	intra				new transcription segment	NA(CDS:THC0290_0085);NA(CDS:THC0290_0086)	3071	A643	B183	C44	61	0	0	0	0	-	0	NA	NA	NA	-	6.7	6.8	6.9	7	6.1	6.2	5.3	6.6	6.1	6.3	6.5	6.6	6.6	3.9	5.2	6.4	3.9	3.9	3.9	3.9	6.7	6.2	6.8	6.8
THC0290_0086	110699	112627	-1	CDS	NA		THC0290_v2_0087		Probable M1 family metalloprotease precursor	NA	4370	A1782	B547	C143	1929	0	0	0	0	-	NA	NA	NA	NA	-	10.3	10.4	11.3	11.2	10.9	11.4	11.4	9.7	11.6	11.5	11	10.9	11.6	11.4	11.1	11	11	11.1	11.5	10.7	10.7	9.9	10.5	10.2
THC0290_0087	112762	113097	-1	CDS	NA		THC0290_v2_0088		Probable single-stranded DNA-binding protein	NA	1032	A1654	B542	C143	336	0	0	0	0	-	NA	NA	NA	NA	-	7.6	7.6	8	7.9	7.8	8.8	7.4	7.9	10.1	10.3	8.4	8.4	11.2	10.6	9.7	9.6	10.4	9.8	10.2	11.1	7.9	7.3	7	6.8
THC0290_N_0068	113267	113949	1	Region	indep	Rfp7			new transcription segment	NA	1315	A1747	B546	C143	683	0	0	0	0	-	0	NA	NA	NA	-	8.4	8.4	8.3	8.2	7.9	8	8.1	7.8	9	9.1	8.4	8.3	9.6	9.7	9.1	8.9	10.4	10.5	10.4	11	8.2	8.4	8.2	8.5
THC0290_flavo-1_0005	113294	113375	1	misc_RNA	NA				Flavo-1 RNA	NA	1318	A1747	B546	C143	82	0	0	0	0	-	NA	NA	NA	NA	-	8.3	8.4	8.1	8.4	8.2	8.2	8.5	7.4	9.7	9.5	8.4	8.4	10	10.8	9.8	9.4	11.2	10.9	11.3	12.5	8.3	8.2	8.4	8.4
THC0290_0088	113950	114297	1	CDS	NA		THC0290_v2_0089		Protein of unknown function	NA	1219	A1740	B546	C143	348	0	0	0	0	-	NA	NA	NA	NA	-	9.1	8.9	8.8	8.8	8.6	8.6	8.7	9.3	9.7	9.6	9.1	9	9.9	10.3	9.7	9.5	10.7	10.1	10.9	11.6	8.8	8.9	8.9	8.6
THC0290_0089	114298	115119	1	CDS	NA	yeeZ	THC0290_v2_0090	yeeZ	Putative enzyme of sugar metabolism YeeZ precursor	NA	2041	A1633	B540	C143	822	0	0	0	0	-	NA	NA	NA	NA	-	9.2	9	8.7	8.9	9	8.4	8.9	8.9	9.6	9.3	9	9	9	10	9.7	9.7	9.5	9	9.7	9.8	9	9	9	9.1
THC0290_N_0069	115134	115173	-1	Region	3prime				new transcription segment	pepO(CDS:THC0290_0090)	-1	NA	NA	NA	40	1	1	0	0	THC0290_N_0070	0	NA	NA	NA	-	NA	NA	NA	NA	NA	NA	NA	NA	NA	NA	NA	NA	NA	NA	NA	NA	NA	NA	NA	NA	NA	NA	NA	NA
THC0290_N_0070	115149	115324	1	Region	3prime				new transcription segment	yeeZ(CDS:THC0290_0089)	714	A1825	B559	C145	176	2	1	1	0	THC0290_0090;THC0290_N_0069	0	NA	NA	NA	-	4.6	4.9	4.6	5.1	4.8	6.4	6.2	7.5	7.2	7.7	4.5	4.8	6.2	4.4	5.1	4.4	6.7	7	6.5	4.8	5.3	4.2	4.6	4.8
THC0290_0090	115174	117234	-1	CDS	NA	pepO	THC0290_v2_0091	pepO	M13 family metallopeptidase PepO precursor	NA	3449	A600	B183	C44	2061	1	1	0	0	THC0290_N_0070	NA	NA	NA	NA	-	12.7	12.7	13.1	13	12	12	11.6	9.8	10.3	10.6	13.5	13.4	10	9.7	10.8	10.7	10.4	10.2	10	10.6	12.7	12.1	12.9	13
THC0290_0091	117237	120656	-1	CDS	NA		THC0290_v2_0092		Probable glycoside hydrolase precursor	NA	2494	A656	B184	C45	3420	0	0	0	0	-	NA	NA	NA	NA	-	10	10	10.4	10.3	9.9	9.6	9.8	8.3	9.8	9.7	10.7	10.6	9.7	9.7	10	9.9	9.4	9.7	9	8.9	9.9	9.6	9.8	9.6
THC0290_0092	120728	121453	1	CDS	NA		THC0290_v2_0093		Probable cytochrome c oxidase biogenesis protein	NA	994	A1511	B519	C143	726	0	0	0	0	-	NA	NA	NA	NA	-	9	8.9	8.7	8.7	9.6	9.3	10	11.1	10.4	10.2	8.7	8.8	10.2	10.3	10.1	10	10.1	9.9	10	10	8.9	9.1	8.8	8.9
THC0290_0093	121549	121791	1	CDS	NA	feoA	THC0290_v2_0094	feoA	Ferrous iron transport protein A	NA	719	A1494	B512	C143	243	0	0	0	0	-	NA	NA	NA	NA	-	10.4	10.5	10.9	11	11.7	12	12	12.3	12.5	13	11.3	11.2	12.8	12.7	12.1	12	13.1	13.7	13.2	13.3	10.5	10.8	10.1	10.3
THC0290_0094	121791	123884	1	CDS	NA	feoB	THC0290_v2_0095	feoB	Ferrous iron transport protein B	NA	4097	A1084	B365	C107	2094	0	0	0	0	-	NA	NA	NA	NA	-	9.5	9.5	10.1	10.1	10.8	10.7	11.3	12	11.4	11	10.4	10.3	10.6	10.6	10.8	11	10.4	10.6	9.7	8.1	9.5	9.8	9	9.3
THC0290_N_0071	123885	124433	1	Region	intra				new transcription segment	NA(CDS:THC0290_0095);feoB(CDS:THC0290_0094)	4098	A1084	B365	C107	549	0	0	0	0	-	0	NA	NA	NA	-	9.2	9.2	9.4	9.5	10.2	10.3	10.8	11.3	11.2	10.9	9.6	9.6	10.5	10.4	10.3	10.2	10	10.1	10.1	9.5	9.4	9.2	8.8	9.1
THC0290_0095	124434	125396	1	CDS	NA		THC0290_v2_0096		Hypothetical protein	NA	522	A1399	B480	C139	963	0	0	0	0	-	NA	NA	NA	NA	-	7.5	7.8	7.7	7.8	7.8	7.4	8	9	7.9	8	7.9	8.1	8.4	8.8	8.5	8.5	8.7	9.4	9.4	9.2	7.7	7.9	7.7	7.8
THC0290_0096	125431	125595	-1	CDS	NA		NA		Hypothetical protein	NA	1203	A1768	B546	C143	165	0	0	0	0	-	NA	NA	NA	NA	-	5	5.2	4.7	5.5	5.7	5.1	5.5	7.1	7	6.2	4.5	4.7	6.9	8.5	7.1	6.1	9.8	8.6	9.5	9.5	5.5	4.5	5	4.8
THC0290_0097	125923	126588	1	CDS	NA	sdhC	THC0290_v2_0097	sdhC	Succinate dehydrogenase, cytochrome b subunit	NA	33	A421	B162	C44	666	0	0	0	0	-	NA	NA	NA	NA	-	12.9	12.9	12.5	12.7	12.4	12.3	12.1	13.3	12.5	12.4	12.2	12.1	12.6	12.6	12.6	12.4	12.6	12.7	12.8	12.8	12.9	13	13	13
THC0290_0098	126598	128607	1	CDS	NA	sdhA	THC0290_v2_0098	sdhA	Succinate dehydrogenase, flavoprotein subunit	NA	2928	A422	B163	C44	2010	0	0	0	0	-	NA	NA	NA	NA	-	13.7	13.6	13.5	13.6	13.2	13	13.1	13.1	12.9	12.6	13.1	13.1	12.4	12.3	13	12.9	12.3	12.2	12.1	12.4	13.7	13.5	13.8	13.7
THC0290_N_0072	128608	128700	1	Region	intra				new transcription segment	NA(CDS:THC0290_0099);sdhA(CDS:THC0290_0098)	2929	A422	B163	C44	93	0	0	0	0	-	0	NA	NA	NA	-	13.1	13.1	12.7	12.8	12.4	12.2	12	12.5	12.1	12.2	12.3	12.5	11.7	11.8	12.1	12.2	11.5	11.5	12	11.5	12.9	13	13	13.1
THC0290_0099	128701	129075	1	CDS	NA		THC0290_v2_0099		Protein of unknown function	NA	2927	A422	B163	C44	375	0	0	0	0	-	NA	NA	NA	NA	-	12.8	12.8	12.4	12.6	12.1	11.5	11.7	12	11.6	11.4	12.1	12.2	11.1	11.7	11.9	11.8	11.2	11	11.1	11	12.8	12.7	13	12.9
THC0290_N_0073	129076	129133	1	Region	intra				new transcription segment	sdhB(CDS:THC0290_0100);NA(CDS:THC0290_0099)	2925	A422	B163	C44	58	0	0	0	0	-	0	NA	NA	NA	-	12.7	12.6	12	12.4	11.8	11.9	11.6	12	11.9	12.2	12	11.8	12.1	11.6	12.1	12	11.5	11.7	12.3	11.5	12.6	12.5	12.7	12.9
THC0290_0100	129134	129898	1	CDS	NA	sdhB	THC0290_v2_0100	sdhB	Succinate dehydrogenase, iron-sulfur protein	NA	2926	A422	B163	C44	765	0	0	0	0	-	NA	NA	NA	NA	-	13.7	13.7	13.6	13.7	13.3	13.1	13	13.5	13.1	12.8	13.2	13.3	12.8	12.7	13.2	13.1	12.6	12.5	12.6	12.8	13.7	13.6	13.8	13.6
THC0290_N_0074	129899	129947	1	Region	3prime				new transcription segment	sdhB(CDS:THC0290_0100)	4395	A1188	B407	C123	49	0	0	0	0	-	0	NA	NA	NA	-	5.9	6.1	5.4	5.6	4.7	4.4	5.6	6.4	6.3	6.7	5.1	5.1	5.7	6.7	7.1	6.3	4.1	8	3.9	3.9	6.1	6.4	6.6	6.5
THC0290_N_0075	129929	130108	-1	Region	indep	Rfp8			new transcription segment	NA	1663	A1768	B546	C143	180	0	0	0	0	-	0	NA	NA	NA	-	5.4	5.3	5.9	5.8	6.5	8.1	7.1	8.8	8.2	9.5	6.3	5.9	10.2	9.2	6.6	6.8	9.5	10.9	11.3	9.7	4.7	5.8	5.4	5.2
THC0290_0101	130216	131295	1	CDS	NA	dinB	THC0290_v2_0101	dinB	DNA polymerase IV, damage-inducible protein DinB	NA	81	A1160	B397	C120	1080	0	0	0	0	-	NA	NA	NA	NA	-	7.6	7.7	7.2	7	6.7	6.8	6.8	6.8	6.8	7.1	7.2	7.1	7.6	7.4	7.2	6.5	7.8	7.6	5.5	8.6	7.9	7.5	8.1	8.3
THC0290_N_0076	131417	131569	1	Region	5prime				new transcription segment	NA(CDS:THC0290_0102)	2583	A205	B75	C24	153	0	0	0	0	-	0	NA	NA	NA	-	12.6	12.7	13.1	13.1	13.1	13.3	12.9	12.5	12.7	12.8	12.7	12.7	13.4	13.3	13.4	13.3	13.2	13.1	13	13.4	12.7	12.3	10.1	10.3
THC0290_0102	131570	132853	1	CDS	NA		THC0290_v2_0102		Protein of unknown function	NA	2579	A204	B75	C24	1284	0	0	0	0	-	NA	NA	NA	NA	-	13.6	13.6	14.1	14	14	13.9	13.7	13	12.6	12.9	13.9	13.9	12.3	12.3	12.8	12.8	12.3	12.3	11.9	11.7	13.6	13	10.8	10.9
THC0290_N_0077	132854	133118	1	Region	intra				new transcription segment	NA(CDS:THC0290_0103);NA(CDS:THC0290_0102)	2584	A205	B75	C24	265	0	0	0	0	-	0	NA	NA	NA	-	12.6	12.7	13.3	13.2	13.3	14	13.3	15.2	13.5	13.8	12.8	12.8	12.7	12.2	12.5	12.5	12.6	12.7	13.1	12.1	12.8	12.3	9.7	9.6
THC0290_0103	133119	133640	1	CDS	NA		THC0290_v2_0103		Protein of unknown function precursor	NA	2581	A204	B75	C24	522	0	0	0	0	-	NA	NA	NA	NA	-	13.7	13.6	14.3	14.1	13.9	13.9	13.2	12.6	11.7	12	13.8	13.9	11.9	11.7	12.4	12.5	11.8	11.8	11.2	10.7	13.7	13.1	10.7	10.6
THC0290_0104	133660	134139	1	CDS	NA		THC0290_v2_0104		Probable lipoprotein precursor	NA	2582	A204	B75	C24	480	0	0	0	0	-	NA	NA	NA	NA	-	13.9	14	14.4	14.3	14.2	14.1	13.7	12	12.1	12.3	14.1	14.1	12.2	12	12.9	13	12.1	12.3	11.3	11.3	14	13.5	11.3	11.3
THC0290_0105	134151	135113	1	CDS	NA		THC0290_v2_0105		Protein of unknown function precursor	NA	2580	A204	B75	C24	963	0	0	0	0	-	NA	NA	NA	NA	-	13.4	13.5	14.1	13.9	13.8	13.7	13.3	11.7	11.4	11.8	13.7	13.7	11.6	11.3	12.3	12.3	11.6	11.5	10.5	10.5	13.5	13	10.4	10.4
THC0290_0106	135128	136084	1	CDS	NA		THC0290_v2_0106		Protein of unknown function precursor	NA	2578	A204	B75	C24	957	0	0	0	0	-	NA	NA	NA	NA	-	13.7	13.7	14.4	14.3	14.2	14.3	13.9	11.3	11.7	12	14.1	14.2	12.3	11.8	12.9	12.6	12.4	12.3	11.3	12.1	13.8	13.3	10.8	10.8
THC0290_N_0078	136085	136144	1	Region	3prime				new transcription segment	NA(CDS:THC0290_0106)	1355	A1747	B546	C143	60	0	0	0	0	-	0	NA	NA	NA	-	7.5	7.7	7.6	7.9	8.2	7.7	8.5	7.4	10.2	9.4	7.7	7.7	9.8	11.6	10.6	9.8	12.7	11.3	11.4	13.5	7.9	7.2	7.8	7.6
THC0290_N_0079	136118	136225	-1	Region	3prime				new transcription segment	NA(CDS:THC0290_0107)	1390	A1763	B546	C143	108	0	0	0	0	-	0	NA	NA	NA	-	9.4	9	9.3	9.5	10	10.5	10.4	11.2	12.5	12.4	9.6	9.2	12.9	12	12.3	12.7	12.3	13.3	14.3	12.5	9	9.6	9.6	9.6
THC0290_0107	136226	138043	-1	CDS	NA		THC0290_v2_0107		Putative outer membrane protein precursor	NA	1391	A1763	B546	C143	1818	1	1	0	0	THC0290_N_0080	NA	NA	NA	NA	-	8.8	8.9	8.8	9.3	9.6	9.6	10.1	9.5	11.5	11.1	8.8	9	11.4	11.3	11.9	11.9	12.4	12.7	12.6	12.7	9	9.1	9.5	9.5
THC0290_N_0080	136276	136338	1	Region	indep	Rfp9			new transcription segment	NA	-1	NA	NA	NA	63	1	0	1	0	THC0290_0107	0	NA	NA	NA	-	NA	NA	NA	NA	NA	NA	NA	NA	NA	NA	NA	NA	NA	NA	NA	NA	NA	NA	NA	NA	NA	NA	NA	NA
THC0290_0108	138173	140128	-1	CDS	NA		THC0290_v2_0108		Penicillin-binding protein	NA	798	A1560	B526	C143	1956	0	0	0	0	-	NA	NA	NA	NA	-	8.6	8.4	8.5	8.4	9	9.4	9.2	9.4	9.6	9.6	8.2	8.4	9.6	9.8	9.6	9.4	9.1	9.1	9.7	9.7	8.4	8.4	8.7	8.9
THC0290_0109	140135	140650	-1	CDS	NA		THC0290_v2_0109		Hypothetical protein	NA	1118	A1762	B546	C143	516	0	0	0	0	-	NA	NA	NA	NA	-	9	9.1	9.3	9.4	9.7	10.1	9.9	10.6	10.5	10.5	9.1	9.2	11.7	11.6	11.1	10.5	12.3	11.7	11.1	11.6	9.4	9.2	9.1	9.1
THC0290_0110	140658	140933	-1	CDS	NA		THC0290_v2_0110		Putative plasmid stabilization system protein	NA	1122	A1768	B546	C143	276	0	0	0	0	-	NA	NA	NA	NA	-	10.4	10.5	10.8	10.8	11.6	11.6	11.3	12.5	12	12	10.8	10.9	13.3	13.3	12.4	12	14.6	14.6	15.1	15.6	10.3	10.9	10.1	9.9
THC0290_0111	140930	141169	-1	CDS	NA		THC0290_v2_0111		Hypothetical protein	NA	1123	A1768	B546	C143	240	0	0	0	0	-	NA	NA	NA	NA	-	11	11	11.4	11.3	11.8	12.7	11.6	13.3	12.3	13.1	11.4	11.4	14.4	13.8	12.5	12.3	15.3	15.7	15.5	15.5	10.8	11.3	11	10.6
THC0290_0112	141203	142564	-1	CDS	NA	radA	THC0290_v2_0112	radA	DNA repair protein RadA	NA	3285	A601	B183	C44	1362	0	0	0	0	-	NA	NA	NA	NA	-	10	10	9.9	9.9	9.3	9.6	9.1	8.4	8.4	8.4	10.2	10.1	8.4	7.9	7.9	7.9	7.2	7.9	7	6.4	10.3	10	9.9	10
THC0290_0113	142567	143847	-1	CDS	NA		THC0290_v2_0113		Protein of unknown function precursor	NA	2500	A660	B185	C45	1281	0	0	0	0	-	NA	NA	NA	NA	-	10.6	10.5	10.7	10.4	10.4	10.6	10.4	9.9	10	10.2	10.9	10.9	10.7	10.6	10.5	10.2	10.4	10.1	9.4	9.4	10.5	10.5	10.3	10.3
THC0290_0114	143895	144854	-1	CDS	NA		THC0290_v2_0114		Probable transmembrane protein of unknown function	NA	122	A1002	B318	C86	960	0	0	0	0	-	NA	NA	NA	NA	-	10.7	10.8	10.1	10.2	10	10	10.1	11.5	9.9	9.7	10.3	9.8	9.6	9.9	9.5	9.5	10.6	9.6	11.2	10.9	11.1	10.8	10.4	10.7
THC0290_0115	144859	145209	-1	CDS	NA	panD	THC0290_v2_0115	panD	Aspartate 1-decarboxylase	NA	966	A1673	B543	C143	351	0	0	0	0	-	NA	NA	NA	NA	-	11.5	11.6	11.3	11.5	11.7	12	11.8	11.2	12.4	12.2	11.2	11.2	12	11.7	11.7	11.6	12.4	12.9	12.7	12.2	11.5	11.7	11.4	11.6
THC0290_0116	145223	146071	-1	CDS	NA	panC	THC0290_v2_0116	panC	Pantoate--beta-alanine ligase	NA	3549	A605	B183	C44	849	0	0	0	0	-	NA	NA	NA	NA	-	11.6	11.4	11.1	10.9	9.9	10.3	9.7	7.5	9.8	9.9	11.1	11	9.6	9.2	9.3	9.4	8.6	9.7	10.2	9.4	11.7	11.6	11.1	11.1
THC0290_0117	146180	146989	1	CDS	NA		THC0290_v2_0117		Protein of unknown function	NA	783	A1557	B526	C143	810	0	0	0	0	-	NA	NA	NA	NA	-	11.8	11.9	11.9	12	12.1	12.1	12.3	11.7	12.6	12.4	11.8	11.8	12.6	12.6	12.5	12.5	12.5	12.4	12.6	12.4	11.8	12.1	12	12.1
THC0290_0118	146989	148653	1	CDS	NA		THC0290_v2_0118		Probable lipoprotein precursor	NA	4247	A665	B187	C46	1665	0	0	0	0	-	NA	NA	NA	NA	-	12.6	12.6	12.6	12.6	12.5	12.6	12.5	12.2	12.4	12.2	12.6	12.4	12.4	12.1	12.5	12.6	11.9	12.1	12.1	11.6	12.5	12.9	12.9	12.8
THC0290_0119	148660	150507	1	CDS	NA	glmS	THC0290_v2_0119	glmS	Glucosamine--fructose-6-phosphate aminotransferase [isomerizing]	NA	3237	A599	B183	C44	1848	0	0	0	0	-	NA	NA	NA	NA	-	13.7	13.6	13.4	13.5	13.1	13	13	12.2	12.6	12.3	13.5	13.4	12.1	12	12.9	12.9	12.1	12.2	11.7	11.7	13.5	13.6	13.6	13.6
THC0290_N_0081	150508	150550	1	Region	3prime				new transcription segment	glmS(CDS:THC0290_0119)	-1	NA	NA	NA	43	0	0	0	0	-	0	NA	NA	NA	-	NA	NA	NA	NA	NA	NA	NA	NA	NA	NA	NA	NA	NA	NA	NA	NA	NA	NA	NA	NA	NA	NA	NA	NA
THC0290_0120	150779	153613	1	CDS	NA		THC0290_v2_0120		Probable TonB-dependent outer membrane receptor precursor	NA	4384	A1785	B548	C143	2835	0	0	0	0	-	NA	NA	NA	NA	-	11.5	11.6	12.1	12.4	12.7	12.4	12.6	11	12	11.9	12.2	12.2	12	12.1	12.1	12.1	12	12	12	11.7	11.5	11.4	11.6	11.4
THC0290_N_0082	153614	153714	1	Region	intra				new transcription segment	NA(CDS:THC0290_0121);NA(CDS:THC0290_0120)	4383	A1785	B548	C143	101	0	0	0	0	-	0	NA	NA	NA	-	10.3	10.5	10.9	11.2	11.5	11.1	11.3	9.8	11	10.6	11.2	11	10.6	11.3	11.3	11.3	11.1	10.9	10.9	10.1	10.3	10.1	10.4	10.1
THC0290_0121	153715	155214	1	CDS	NA		THC0290_v2_0121		Probable lipoprotein precursor	NA	4385	A1785	B548	C143	1500	0	0	0	0	-	NA	NA	NA	NA	-	11.4	11.4	12	12.3	12.5	12.3	12.7	11.1	12	11.8	12.1	11.9	11.8	11.8	12.3	12.1	12.1	12	12.3	12	11.5	11	11.4	11.3
THC0290_N_0083	155215	155259	1	Region	3prime				new transcription segment	NA(CDS:THC0290_0121)	-1	NA	NA	NA	45	0	0	0	0	-	0	NA	NA	NA	-	NA	NA	NA	NA	NA	NA	NA	NA	NA	NA	NA	NA	NA	NA	NA	NA	NA	NA	NA	NA	NA	NA	NA	NA
THC0290_N_0084	155251	155313	-1	Region	indep	Rfp10			new transcription segment	NA	233	A1827	B560	C145	63	0	0	0	0	-	0	NA	NA	NA	-	7.3	7.2	8	7.9	7.6	9.5	8	10.1	7.6	9.6	8.1	7.8	9.5	6.2	7.8	7.7	6.7	9	10.6	4	7.1	7.8	7.5	7.8
THC0290_N_0085	155311	155418	1	Region	5prime				new transcription segment	atpD(CDS:THC0290_0122)	2501	A661	B185	C45	108	0	0	0	0	-	0	NA	NA	NA	-	8.8	8.3	8.7	8.8	9.1	9.1	9.3	9	8.6	8.6	9	9	9.5	9	9.6	9.6	8.5	9.3	3.9	4.1	8.7	8.5	8.4	8.5
THC0290_0122	155419	156930	1	CDS	NA	atpD	THC0290_v2_0122	atpD	ATP synthase beta subunit	NA	3475	A600	B183	C44	1512	0	0	0	0	-	NA	NA	NA	NA	-	14.6	14.8	14.1	14.2	13.9	13.3	13.8	13.9	13.7	13.2	14.2	14.2	12.4	12.4	13.1	13.3	12.5	12.3	12.4	12.2	14.7	14.6	14.6	14.6
THC0290_N_0086	156931	157009	1	Region	intra				new transcription segment	atpC(CDS:THC0290_0123);atpD(CDS:THC0290_0122)	3112	A639	B183	C44	79	0	0	0	0	-	0	NA	NA	NA	-	12.5	12.2	11.4	11.5	10.9	9.6	10.5	11.4	10.7	9.9	11.6	11.8	9.5	10.1	10.6	10.7	9.9	8.9	9.4	8.5	12.4	12.3	12.1	11.9
THC0290_0123	157010	157291	1	CDS	NA	atpC	THC0290_v2_0123	atpC	ATP synthase epsilon subunit	NA	3476	A600	B183	C44	282	0	0	0	0	-	NA	NA	NA	NA	-	14.7	14.7	14.1	14.1	13.6	13.3	13.5	13.6	12.7	13.2	14.2	14.1	12.5	12	12.6	13	11.9	12.1	12.3	11.5	14.7	14.5	14.7	14.5
THC0290_N_0087	157292	157355	1	Region	3prime				new transcription segment	atpC(CDS:THC0290_0123)	41	A1142	B385	C113	64	0	0	0	0	-	0	NA	NA	NA	-	6.6	6.2	5.5	6	6.2	6.4	6.7	7.1	7.2	6.9	6.6	6.3	4	7.8	4	6.4	8	7.2	6.9	5.3	6.3	6.7	5.8	6.4
THC0290_0124	157356	157871	1	CDS	NA		THC0290_v2_0124		Hypothetical transmembrane protein	NA	2656	A51	B28	C13	516	0	0	0	0	-	NA	NA	NA	NA	-	9	8.8	8.3	8.2	7.9	8	7.6	9.1	8.2	8.2	8.4	8.2	7.3	7.2	6.8	7	8	7.1	8.7	9.8	8.9	9.1	8.7	8.7
THC0290_N_0088	157872	157951	1	Region	intra				new transcription segment	NA(CDS:THC0290_0125);NA(CDS:THC0290_0124)	3920	A72	B35	C14	80	0	0	0	0	-	0	NA	NA	NA	-	9.1	9	8.6	8.5	8.2	7.7	7.6	9.2	8.6	8	8.7	9	8.3	9.2	7	7.3	9	8.4	10	9.2	8.9	9.3	8.5	8.4
THC0290_0125	157952	158140	1	CDS	NA		THC0290_v2_0125		Hypothetical protein	NA	3168	A558	B183	C44	189	0	0	0	0	-	NA	NA	NA	NA	-	9.6	9.8	9.2	9.3	9.1	8.2	8.2	9.8	8.7	7.9	9.5	9.5	6.8	7.7	7	7.2	9.1	7.9	9.5	9.4	9.7	10	9.2	9.1
THC0290_0126	158144	158260	1	CDS	NA		THC0290_v2_0126		Hypothetical protein	NA	3921	A71	B35	C14	117	0	0	0	0	-	NA	NA	NA	NA	-	10.2	10.3	9.9	9.9	9.6	9.3	9.2	10.2	9.3	9	9.8	10	9	9	8.3	8.1	9.3	9.4	10.5	10	10.2	10.3	9.9	9.7
THC0290_0127	158321	159478	1	CDS	NA	bioF	THC0290_v2_0127	bioF	8-amino-7-oxononanoate synthase	NA	3166	A558	B183	C44	1158	0	0	0	0	-	NA	NA	NA	NA	-	9.8	9.6	9.1	9.3	8.9	8.7	8.7	9.2	8.4	8.3	9.5	9.3	6.3	6.9	6.6	7.5	6.7	7.4	8.4	8	9.6	9.7	9.5	9.4
THC0290_0128	159521	159862	1	CDS	NA		THC0290_v2_0128		Protein of unknown function precursor	NA	417	A1244	B419	C125	342	0	0	0	0	-	NA	NA	NA	NA	-	11.5	11.4	11.4	11.6	11.3	11.5	11.2	11.5	11.7	12	11.7	11.6	12.8	12.3	12	12.3	12.5	12.7	13.1	13	11.5	11.8	11.5	11.5
THC0290_N_0089	159863	159978	1	Region	intra				new transcription segment	NA(CDS:THC0290_0129);NA(CDS:THC0290_0128)	419	A1244	B419	C125	116	0	0	0	0	-	0	NA	NA	NA	-	10.1	10.1	10.1	10.2	10.3	9.7	10.2	10.7	11.1	10.7	10.3	10.4	10.5	11	10.9	11.2	10.4	10.3	10.9	11.6	10.1	10.5	10.2	10.3
THC0290_0129	159979	160953	1	CDS	NA		THC0290_v2_0129		Putative outer membrane protein precursor	NA	330	A1248	B419	C125	975	0	0	0	0	-	NA	NA	NA	NA	-	11.2	11.2	12	12.4	12.3	12.4	12.1	13.4	13.5	12.7	11.7	11.4	12.3	12.4	12.2	12.3	12.2	12.2	12.5	12.7	11	11.4	11.6	11.6
THC0290_N_0090	160954	161007	1	Region	3prime				new transcription segment	NA(CDS:THC0290_0129)	390	A1281	B430	C125	54	0	0	0	0	-	0	NA	NA	NA	-	4.2	3.9	3.9	3.9	3.9	4.6	4.4	8.2	5.1	3.9	3.9	4.1	3.9	3.9	3.9	4.1	3.9	3.9	3.9	6.5	5.3	4	4.3	4.3
THC0290_0130	161008	162009	1	CDS	NA		THC0290_v2_0130		Probable acyl-protein synthetase	NA	1698	A1715	B546	C143	1002	0	0	0	0	-	NA	NA	NA	NA	-	9.3	9	8.8	8.9	9.4	9.4	9.8	10.7	10.5	10.1	8.9	9	9.9	10.1	9.4	9.3	9.8	10.6	10.1	10.1	9.1	9.1	9.3	9.4
THC0290_N_0091	162010	162767	1	Region	3prime				new transcription segment	NA(CDS:THC0290_0130)	206	A1820	B557	C145	758	3	1	2	0	THC0290_0131;THC0290_0132;THC0290_N_0092	0	NA	NA	NA	-	7.2	7.1	7.1	7.3	7.6	7.7	8.3	8.7	8.6	8.4	7.1	6.8	7.7	7.1	7.3	7.6	4.1	4.4	5.2	5.8	7	7.2	6.9	7.6
THC0290_0131	162019	162429	-1	CDS	NA		THC0290_v2_0131		Protein of unknown function	NA	3210	A598	B183	C44	411	1	1	0	0	THC0290_N_0091	NA	NA	NA	NA	-	10.4	10.5	9.8	9.7	8.8	8.9	8.8	7.9	9.1	9.4	10	9.6	9.2	8.5	8.8	8.4	8.9	8.6	7.1	6.9	11	10.5	10.4	10.4
THC0290_N_0092	162430	162618	-1	Region	intra				new transcription segment	NA(CDS:THC0290_0131);pheS(CDS:THC0290_0132)	3656	A456	B168	C44	189	2	1	0	1	THC0290_flavo-1_0006;THC0290_N_0091	0	NA	NA	NA	-	9.8	9.6	9.2	9	8.7	9.1	9.3	7.9	9.5	9.5	9.4	9.1	8.3	8.2	8.5	8.3	8.8	8.6	8.9	6	10.2	9.8	9.8	10
THC0290_flavo-1_0006	162474	162616	1	misc_RNA	NA				Flavo-1 RNA	NA	391	A1282	B430	C125	143	1	1	0	0	THC0290_N_0092	NA	NA	NA	NA	-	5	5.3	4.8	4.9	5.5	5.4	6.2	6.3	5.9	6.5	4.8	4.8	3.9	4	3.9	4.8	4	4	3.9	8.6	4.6	5	5	5.2
THC0290_0132	162619	163638	-1	CDS	NA	pheS	THC0290_v2_0132	pheS	Phenylalanine--tRNA ligase alpha subunit	NA	3552	A605	B183	C44	1020	1	1	0	0	THC0290_N_0091	NA	NA	NA	NA	-	12.4	12.4	12.3	11.9	11.4	11.7	11.6	9.1	11.8	12	12.2	11.9	11.1	10.6	11.1	10.9	10.7	10.8	10.6	9.8	12.9	12.2	12.6	12.8
THC0290_N_0093	163655	163724	-1	Region	5prime				new transcription segment	pheS(CDS:THC0290_0132)	3119	A553	B182	C44	70	0	0	0	0	-	0	NA	NA	NA	-	10.1	9.7	9.2	8.9	8	7.8	7.7	7.3	6.9	6.3	9.1	9.2	8.2	9.2	8.4	7.9	3.9	3.9	3.9	3.9	10	9.5	10.2	10.6
THC0290_0133	163777	164133	-1	CDS	NA		THC0290_v2_0133		Protein of unknown function	NA	3997	A304	B113	C32	357	0	0	0	0	-	NA	NA	NA	NA	-	9.8	9.4	9	8.7	7.8	8.4	7.5	7.6	8.1	8.8	9.2	9.1	10	10	8.5	8.5	10.8	10.8	10.1	10	9.8	9.6	9.8	10.3
THC0290_N_0094	164134	164212	-1	Region	5prime				new transcription segment	NA(CDS:THC0290_0133)	3998	A305	B113	C32	79	0	0	0	0	-	0	NA	NA	NA	-	8.6	8.4	8	7.7	7	7.5	6.6	6.6	6	7.9	8.1	8	8.9	7.9	7.2	7.3	9.1	10.7	9.9	6.4	8.8	8.8	8.7	9.2
THC0290_N_0095	164214	164791	-1	Region	repeated_region				new transcription segment	NA	4267	A676	B189	C46	578	1	0	1	0	THC0290_0134	0	NA	NA	NA	-	8.6	8.3	8.3	7.9	6.9	6.7	7.1	5.8	5.4	4.3	8.3	8.1	8.3	6.6	8.8	8.3	8	7.8	6.6	5.9	9.2	8.8	8.2	9.2
THC0290_0134	164278	164808	1	CDS	NA		THC0290_v2_0134		Probable transmembrane protein of unknown function	NA	1997	A1448	B502	C142	531	1	1	0	0	THC0290_N_0095	NA	NA	NA	NA	-	8.8	8.7	8.7	8.8	8.8	9.1	8.6	8.2	9.5	9.7	8.9	8.7	10.2	10.3	9.2	8.7	11	11.4	11.1	11.9	8.6	8.6	8.9	8.8
THC0290_0135	164792	165535	-1	CDS	NA	batE	THC0290_v2_0135	batE	BatE protein	NA	4268	A676	B189	C46	744	1	1	0	0	THC0290_N_0096	NA	NA	NA	NA	-	9.2	9.3	9.1	9	8.9	8.6	8.7	9.4	7.4	7.1	9.2	9.2	9.2	8.3	9.7	9.7	9.7	9.3	8.3	7.8	9.6	9.7	9.1	9.6
THC0290_N_0096	164809	165563	1	Region	3prime				new transcription segment	NA(CDS:THC0290_0134)	2380	A191	B70	C21	755	1	0	1	0	THC0290_0135	0	NA	NA	NA	-	7	7.1	7	7.3	7.1	7.1	7.2	7.6	7.5	7.3	7.2	6.8	6.8	4.8	6.3	6.3	5.7	4.3	7	4.8	7.1	6.8	6.9	7.3
THC0290_N_0097	165536	166702	-1	Region	repeated_region				new transcription segment	NA	4277	A677	B189	C46	1167	0	0	0	0	-	0	NA	NA	NA	-	13.9	13.7	13.9	13.6	13	13.2	12.8	13	11.1	11.4	13.9	13.9	12.5	11.8	12.9	13.1	12.4	12.6	12.8	12.8	13.9	14	13.4	13.6
THC0290_0136	166703	168505	-1	CDS	NA	batD	THC0290_v2_0136	batD	BatD protein	NA	4278	A677	B189	C46	1803	0	0	0	0	-	NA	NA	NA	NA	-	11.3	11.1	10.9	10.6	10	9.9	9.7	9.8	8.2	8.2	11.1	11	10.3	9.5	10.7	10.7	10	10.4	9.6	9.9	11.3	11.6	10.5	11
THC0290_0137	168527	169240	-1	CDS	NA	batC	THC0290_v2_0137	batC	BatC protein	NA	4273	A677	B189	C46	714	0	0	0	0	-	NA	NA	NA	NA	-	11.1	10.9	11.1	10.7	10.3	10.3	10.2	10.2	8	8.7	10.9	11.1	10.8	10.6	11.4	11.3	11.1	11.3	11	10.7	11.1	11.3	10.4	10.6
THC0290_N_0098	169241	170135	-1	Region	repeated_region				new transcription segment	NA	4275	A677	B189	C46	895	0	0	0	0	-	0	NA	NA	NA	-	14.9	14.9	15.4	14.9	14.8	15.4	14.5	14.5	12.9	13.2	15.2	15.3	14.5	13.3	14.5	14.2	14	14.4	14.5	14	14.9	15	14.7	14.7
THC0290_0138	170136	171176	-1	CDS	NA	batB	THC0290_v2_0141	batB	BatB protein	NA	4271	A677	B189	C46	1041	0	0	0	0	-	NA	NA	NA	NA	-	11.2	11.1	11.1	11	10.5	10.2	10.2	10.6	8.7	8.7	11.2	11.2	10.9	10.5	11.2	11.6	10.9	10.8	10.4	9.9	11.2	11.5	10.9	10.7
THC0290_N_0099	171177	171320	-1	Region	intra				new transcription segment	batB(CDS:THC0290_0138);NA(CDS:THC0290_0139)	4274	A677	B189	C46	144	0	0	0	0	-	0	NA	NA	NA	-	11.9	11.2	11	11.1	10.3	9.8	10.8	10.2	8.4	8.7	11.5	11.4	11.5	11.2	11.8	11.8	11.4	11.5	11.4	11.1	11.6	11.7	10.6	10.9
THC0290_0139	171321	171701	-1	CDS	NA		THC0290_v2_0142		Protein of unknown function	NA	4272	A677	B189	C46	381	0	0	0	0	-	NA	NA	NA	NA	-	10.9	11.1	10.7	10.7	10	9.7	9.8	10.4	8.1	8.1	10.8	10.9	10.5	10.2	11.1	11	10.2	10.5	10.1	9.9	11.1	11.3	10.5	10.4
THC0290_N_0100	171702	171755	-1	Region	intra				new transcription segment	NA(CDS:THC0290_0139);batA(CDS:THC0290_0140)	4276	A677	B189	C46	54	0	0	0	0	-	0	NA	NA	NA	-	13.2	13.1	13.1	12.8	12.3	12.2	11.9	11.1	10.1	10.2	13	12.9	12	11.4	12.4	12.6	12.1	12	12.4	11.9	13.2	13.4	12.7	12.5
THC0290_0140	171756	172757	-1	CDS	NA	batA	THC0290_v2_0143	batA	BatA protein	NA	4270	A677	B189	C46	1002	0	0	0	0	-	NA	NA	NA	NA	-	11.6	11.4	11.3	11	10.3	9.9	10.4	9.5	8.6	8.6	11.4	11.3	10.7	10.4	11.6	11.4	11.1	10.8	10.3	10.5	11.7	11.6	10.8	11
THC0290_0141	172759	174345	-1	CDS	NA		THC0290_v2_0144		Probable transmembrane protein of unknown function	NA	4269	A677	B189	C46	1587	0	0	0	0	-	NA	NA	NA	NA	-	11.5	11.3	11.1	10.9	10.2	9.9	10	10.4	8	8	11.3	11.2	10.9	10.3	11.2	11.2	10.6	10.8	10.6	10.3	11.4	11.8	10.7	10.8
THC0290_N_0101	174346	176105	-1	Region	repeated_region				new transcription segment	NA	4266	A672	B188	C46	1760	0	0	0	0	-	1	175919,176023,-	0.501	105	VVKKNNEFNHKVHEEKHKEHKACEPREKPCVLRG	15.6	15.6	16.5	15.8	15.4	15.7	15.3	15.8	13.1	13.2	16.1	15.9	15.5	14	15.1	14.7	14.3	14.7	14.7	14.5	15.5	15.7	15	15.1
THC0290_0142	176106	176972	-1	CDS	NA		THC0290_v2_0145		Protein of unknown function	NA	2843	A545	B180	C44	867	0	0	0	0	-	NA	NA	NA	NA	-	12.9	12.9	12.6	12.4	11.2	10.8	10.7	10.9	9	8.9	12.6	12.6	11	10.9	11.4	11.4	10.9	10.7	10.6	10.9	12.9	12.8	12.5	12.4
THC0290_N_0102	176973	177041	-1	Region	intra				new transcription segment	NA(CDS:THC0290_0142);NA(CDS:THC0290_0143)	2844	A545	B180	C44	69	0	0	0	0	-	0	NA	NA	NA	-	13.5	13.5	13.1	13	11.9	11.7	11.4	11.1	9.6	9.7	13.4	13.1	12	11.8	11.9	11.7	11.6	11.7	11.7	11	13.7	13.5	13.3	13.2
THC0290_0143	177042	178046	-1	CDS	NA		THC0290_v2_0146		ATPase, MoxR family	NA	3759	A853	B257	C70	1005	0	0	0	0	-	NA	NA	NA	NA	-	13	12.9	12.6	12.5	11.4	11.1	10.9	11	9.7	9.8	12.7	12.7	12.2	12.4	11.9	11.9	12.6	12.6	12.1	12.1	12.9	13	12.9	12.5
THC0290_N_0103	178047	178088	-1	Region	5prime				new transcription segment	NA(CDS:THC0290_0143)	3760	A853	B257	C70	42	0	0	0	0	-	0	NA	NA	NA	-	10.6	10.3	10.1	9.8	9.1	8.2	8.7	8.5	7.7	6.7	10.2	10.4	10.2	11.2	10.3	10.3	10.8	10.7	10.5	9.5	10.5	10.4	10.3	9.9
THC0290_0144	178131	179366	1	CDS	NA		THC0290_v2_0147		Protein of unknown function, putative transcriptional regulator	NA	614	A1107	B371	C109	1236	0	0	0	0	-	NA	NA	NA	NA	-	8.4	8.7	9.4	9.5	10.1	10	9.9	10.1	9.4	9.4	9.4	9.7	9.4	9.4	9.2	9.4	9.8	10.1	10.6	11.1	8.3	8.4	8.2	7.9
THC0290_0145	179347	180096	1	CDS	NA	pphA	THC0290_v2_0148	pphA	Phosphoprotein phosphatase	NA	4302	A739	B212	C55	750	0	0	0	0	-	NA	NA	NA	NA	-	9.1	9	9.5	9.6	9.9	9.8	9.5	9	9.1	8.8	9.8	9.7	8.4	8.2	8.6	9	9.7	8.6	9.1	9.6	8.8	8.9	8.9	8.7
THC0290_0146	180146	180661	1	CDS	NA		THC0290_v2_0149		Probable outer membrane protein precursor, OmpA family	NA	3471	A600	B183	C44	516	0	0	0	0	-	NA	NA	NA	NA	-	12.3	12.4	12.2	12.3	11.3	11.7	10.6	11.2	10.8	10.9	12.2	12.3	10.3	9.9	10	10.3	10	10.7	11.2	10.3	12.3	12.6	12.5	12.4
THC0290_N_0104	180662	180746	1	Region	intra				new transcription segment	phnA(CDS:THC0290_0147);NA(CDS:THC0290_0146)	825	A1552	B523	C143	85	0	0	0	0	-	0	NA	NA	NA	-	5.4	5.5	5.1	5.6	5.4	5.5	5.5	4.1	4	4.3	4.8	4.8	8.4	11.5	9.6	7.7	9.9	4.9	9.1	11.5	5.8	4.8	5.7	5.6
THC0290_0147	180747	181328	1	CDS	NA	phnA	THC0290_v2_0150	phnA	PhnA protein	NA	3724	A515	B180	C44	582	0	0	0	0	-	NA	NA	NA	NA	-	11.1	11.5	11.1	11.2	10.4	10	9.5	7.1	9.5	9.3	10.8	10.7	8.1	9.7	9	8.8	10.6	9.4	9.6	11.9	11.2	11.2	12.2	12
THC0290_N_0105	181329	181417	-1	Region	3prime				new transcription segment	gpsA(CDS:THC0290_0148)	889	A1593	B534	C143	89	1	1	0	0	THC0290_N_0106	0	NA	NA	NA	-	8.3	8.4	8.5	8.6	9.2	9.3	9.5	9.1	10.9	10.2	8.7	8.5	10.8	11	9.7	9.7	10.4	10.7	9.8	7.8	8.2	8.4	8.3	8.1
THC0290_N_0106	181329	181404	1	Region	3prime				new transcription segment	phnA(CDS:THC0290_0147)	881	A1519	B521	C143	76	1	1	0	0	THC0290_N_0105	0	NA	NA	NA	-	6.6	6.4	6.5	6.6	6.8	6.3	6.5	6.4	8.7	7.3	6.6	6.8	7	9.9	8.3	6.7	10.8	10.7	8.6	11.7	7	6.5	7	6.8
THC0290_0148	181418	182413	-1	CDS	NA	gpsA	THC0290_v2_0151	gpsA	Glycerol-3-phosphate dehydrogenase (NAD(P)+)	NA	4038	A16	B8	C3	996	0	0	0	0	-	NA	NA	NA	NA	-	11	11	11.2	11.2	11.2	11.1	11	9.1	11.3	11.1	11.3	11.1	11.2	11.3	10.9	10.9	11.8	11.3	10.7	11.4	10.9	11	11.2	11
THC0290_N_0107	182563	182671	1	Region	indep	Rfp11			new transcription segment	NA	1454	A1768	B546	C143	109	1	1	0	0	THC0290_N_0108	0	NA	NA	NA	-	4	3.9	3.9	3.9	5.3	6.3	6	7.6	8.1	9.6	4	4	11	13.4	10.5	9	9.7	12.4	14.8	13.3	3.9	4.1	3.9	3.9
THC0290_N_0108	182582	182666	-1	Region	3prime				new transcription segment	NA(CDS:THC0290_0149)	2296	A793	B241	C67	85	1	1	0	0	THC0290_N_0107	0	NA	NA	NA	-	5.4	5.6	4.8	4.9	4.2	4.3	5.5	5	5.7	5.7	4.8	5.2	6.2	3.9	5.8	4.2	3.9	3.9	3.9	3.9	5.9	5.4	6.9	7
THC0290_0149	182667	183833	-1	CDS	NA		THC0290_v2_0152		Probable alcohol dehydrogenase	NA	3768	A819	B248	C68	1167	0	0	0	0	-	NA	NA	NA	NA	-	13.2	13.1	13	13.1	12.8	12.6	12.8	12.4	11.8	11.7	12.9	13	13	12.8	13	13.1	12.8	12.6	13	12.8	13.2	13.3	13.9	13.6
THC0290_0150	183908	184489	-1	CDS	NA	nadD	THC0290_v2_0153	nadD	Nicotinate-nucleotide adenylyltransferase	NA	3923	A74	B35	C14	582	1	1	0	0	THC0290_N_0109	NA	NA	NA	NA	-	10.6	10.6	10.4	10.3	10.4	10.6	10.2	10.1	9.8	10.2	10.6	10.6	10.5	10.8	9.7	9.5	11.5	11.5	10.7	10.6	10.9	10.9	10.5	10.4
THC0290_N_0109	184225	184363	1	Region	indep	Rfp12			new transcription segment	NA	1513	A1768	B546	C143	139	1	0	1	0	THC0290_0150	0	NA	NA	NA	-	6.7	6.8	6.8	7.3	7.4	7.3	7.5	9.2	8.5	8	7	7.2	8.3	9.9	8.8	7.9	10.7	8.7	9.6	11	6.7	6.8	7.1	6.2
THC0290_N_0110	184503	184526	-1	Region	5prime				new transcription segment	nadD(CDS:THC0290_0150)	-1	NA	NA	NA	24	0	0	0	0	-	0	NA	NA	NA	-	NA	NA	NA	NA	NA	NA	NA	NA	NA	NA	NA	NA	NA	NA	NA	NA	NA	NA	NA	NA	NA	NA	NA	NA
THC0290_N_0111	184722	184764	-1	Region	3prime				new transcription segment	NA(CDS:THC0290_0151)	-1	NA	NA	NA	43	0	0	0	0	-	0	NA	NA	NA	-	NA	NA	NA	NA	NA	NA	NA	NA	NA	NA	NA	NA	NA	NA	NA	NA	NA	NA	NA	NA	NA	NA	NA	NA
THC0290_0151	184765	187650	-1	CDS	NA		THC0290_v2_0154		Probable TonB-dependent outer membrane receptor precursor	NA	3046	A536	B180	C44	2886	0	0	0	0	-	NA	NA	NA	NA	-	14.5	14.4	14.1	14.1	14.3	14.5	14	13.8	14.2	14	14	14	12.3	11.9	12.9	13.3	12.9	13.1	13.9	13.7	14.5	14.4	14	14.1
THC0290_N_0112	187683	187830	-1	Region	intra				new transcription segment	NA(CDS:THC0290_0151);pgi(CDS:THC0290_0152)	2919	A494	B173	C44	148	0	0	0	0	-	0	NA	NA	NA	-	10.4	10.4	10.3	10.4	10.1	10.1	9.5	10.7	9.1	9.2	10.5	10.5	8.8	8.6	9.3	9.1	7.6	8.6	9.9	9.9	10.5	10.6	10.1	9.9
THC0290_0152	187831	189474	-1	CDS	NA	pgi	THC0290_v2_0155	pgi	Glucose-6-phosphate isomerase	NA	3628	A595	B183	C44	1644	0	0	0	0	-	NA	NA	NA	NA	-	11.7	11.7	11.9	11.8	11.6	11.7	11.3	11.5	10.9	11	11.8	11.9	10.4	9.4	10.6	10.5	9.8	10.4	10.4	9.9	11.7	11.5	11.4	11.3
THC0290_N_0113	189572	189615	-1	Region	3prime				new transcription segment	rplY(CDS:THC0290_0153)	-1	NA	NA	NA	44	0	0	0	0	-	0	NA	NA	NA	-	NA	NA	NA	NA	NA	NA	NA	NA	NA	NA	NA	NA	NA	NA	NA	NA	NA	NA	NA	NA	NA	NA	NA	NA
THC0290_0153	189616	190227	-1	CDS	NA	rplY	THC0290_v2_0156	rplY	50S ribosomal protein L25	NA	3057	A573	B183	C44	612	0	0	0	0	-	NA	NA	NA	NA	-	14.4	14.5	14.1	14.2	14.1	14	14.2	13.2	14.3	14.2	14.2	14.2	13.1	12.9	13.5	13.8	12.8	13	13.1	12.9	14.5	14.6	14.6	14.6
THC0290_N_0114	190228	190314	-1	Region	intra				new transcription segment	rplY(CDS:THC0290_0153);prsA(CDS:THC0290_0154)	2713	A79	B36	C15	87	0	0	0	0	-	0	NA	NA	NA	-	12.4	12.4	12.1	12.2	12.2	12.4	12.4	12.3	13	13.2	12.1	12	11.7	11.4	12	12.5	11.3	11.7	11.9	10.8	12.2	12.2	12.1	11.8
THC0290_0154	190315	191256	-1	CDS	NA	prsA	THC0290_v2_0157	prsA	Ribose-phosphate diphosphokinase	NA	2714	A79	B36	C15	942	0	0	0	0	-	NA	NA	NA	NA	-	13.4	13.4	13.4	13.3	13.5	13.4	13.7	13.4	13.9	13.7	13.3	13.3	12.6	12.2	13	13.2	12.3	12.5	12.7	12.5	13.3	13.4	13.2	13
THC0290_N_0115	191257	191300	-1	Region	5prime				new transcription segment	prsA(CDS:THC0290_0154)	3829	A761	B226	C62	44	0	0	0	0	-	0	NA	NA	NA	-	12.4	12.5	12.6	12.6	12.8	13.4	13	12.3	12.9	14	12.5	12.4	12.9	11.8	12.4	12.4	11.8	12.6	13.4	12.1	12.5	12.2	12.4	12.1
THC0290_N_0116	191386	191431	1	Region	5prime				new transcription segment	NA(Region:THC0290_N_0117)	-1	NA	NA	NA	46	0	0	0	0	-	0	NA	NA	NA	-	NA	NA	NA	NA	NA	NA	NA	NA	NA	NA	NA	NA	NA	NA	NA	NA	NA	NA	NA	NA	NA	NA	NA	NA
THC0290_tRNA_0003	191432	191514	1	tRNA	NA				transfer RNA-Leu	NA	1609	A1769	B546	C143	83	0	0	0	0	-	NA	NA	NA	NA	-	11.6	10.7	12.5	12.9	13.1	14.3	13.7	15.6	14.8	15.9	12.8	12.4	16.3	15.8	15.3	13.9	16.1	16.2	16.8	16.5	12.2	11.6	11.9	11.9
THC0290_N_0117	191515	191545	1	Region	3prime				new transcription segment	NA(Region:THC0290_N_0116)	-1	NA	NA	NA	31	0	0	0	0	-	0	NA	NA	NA	-	NA	NA	NA	NA	NA	NA	NA	NA	NA	NA	NA	NA	NA	NA	NA	NA	NA	NA	NA	NA	NA	NA	NA	NA
THC0290_N_0118	191567	191761	-1	Region	3prime-PT				new transcription segment	NA	1004	A1724	B546	C143	195	0	0	0	0	-	0	NA	NA	NA	-	7.7	7.6	7.6	7.7	8.1	9.1	8.9	10	9.1	9.7	8	7.6	10.8	10	10.4	10.4	9.6	10.5	10.9	8.6	8	8.3	6.9	7.4
THC0290_N_0119	191762	191803	-1	Region	3prime				new transcription segment	NA(Region:THC0290_N_0120)	-1	NA	NA	NA	42	0	0	0	0	-	0	NA	NA	NA	-	NA	NA	NA	NA	NA	NA	NA	NA	NA	NA	NA	NA	NA	NA	NA	NA	NA	NA	NA	NA	NA	NA	NA	NA
THC0290_tRNA_0004	191804	191888	-1	tRNA	NA				transfer RNA-Leu	NA	1444	A1768	B546	C143	85	0	0	0	0	-	NA	NA	NA	NA	-	7.8	7.7	7.6	8.1	8.3	10.3	9.1	11.4	11	12.4	7.8	7.9	12.6	12	10.7	10	12.7	13	14.4	13.5	7.9	7.5	8.1	7.7
THC0290_N_0120	191889	191933	-1	Region	5prime				new transcription segment	NA(Region:THC0290_N_0119)	-1	NA	NA	NA	45	0	0	0	0	-	0	NA	NA	NA	-	NA	NA	NA	NA	NA	NA	NA	NA	NA	NA	NA	NA	NA	NA	NA	NA	NA	NA	NA	NA	NA	NA	NA	NA
THC0290_N_0121	191971	192020	1	Region	5prime				new transcription segment	NA(CDS:THC0290_0155)	3680	A436	B165	C44	50	0	0	0	0	-	0	NA	NA	NA	-	11.5	11.5	11.5	11.3	11	11.5	10.9	10.6	11	11.1	11.7	11.5	11.1	10.3	10.4	10.6	10.8	11.7	12	11.1	11.5	11.4	11.7	11.6
THC0290_0155	192021	193409	1	CDS	NA		THC0290_v2_0158		ArgE/DapE/Acy1 family protein	NA	3635	A592	B183	C44	1389	0	0	0	0	-	NA	NA	NA	NA	-	12.3	12.2	12.2	12.4	12.1	11.8	12	11.1	11.9	11.4	12.5	12.3	11.1	11.2	11.4	11.5	11.2	11.4	11.1	11.1	12.2	12.2	12.5	12.3
THC0290_0156	193420	193971	1	CDS	NA		THC0290_v2_0159		Probable phospholipid N-methyltransferase	NA	3355	A601	B183	C44	552	0	0	0	0	-	NA	NA	NA	NA	-	11.6	11.4	11.3	11.4	11.1	11.1	10.7	11.7	10.7	10.1	11.7	11.4	10.1	9.9	10.4	10.5	10.1	10.1	9.8	8.4	11.4	11.7	11.5	11.7
THC0290_N_0122	193972	194172	1	Region	3prime				new transcription segment	NA(CDS:THC0290_0156)	3275	A611	B183	C44	201	0	0	0	0	-	0	NA	NA	NA	-	9.7	9.8	9.8	9.9	10.2	10.1	10.1	11.6	8.9	8.8	9.8	9.8	7.8	6.8	8.4	9	8	8	3.9	3.9	9.9	10.2	9.7	9.9
THC0290_0157	194650	195750	1	CDS	NA		THC0290_v2_0160		Probable transmembrane protein of unknown function	NA	1523	A1765	B546	C143	1101	0	0	0	0	-	NA	NA	NA	NA	-	8.2	8.1	8	8.3	8.9	9.4	9.3	10	10.5	10.7	8.2	8	11.9	12.1	10.8	10.6	12.5	12.3	11.9	12.4	8.1	8.2	8.4	8.7
THC0290_0158	196171	197463	1	CDS	NA	pepP	THC0290_v2_0161	pepP	Xaa-Pro aminopeptidase	NA	2550	A264	B94	C27	1293	0	0	0	0	-	NA	NA	NA	NA	-	12.8	13	13.6	13.5	13.2	12.9	12.9	13	13.3	12.6	13.3	13.6	11.9	12.1	12.4	12.6	12.1	12.1	12.1	12.3	12.7	12.6	12.9	12.7
THC0290_0159	197573	198358	1	CDS	NA		THC0290_v2_0162		Probable hydrolase	NA	2391	A390	B149	C42	786	1	1	0	0	THC0290_N_0123	NA	NA	NA	NA	-	8.4	8.4	8	7.8	7.7	7.8	8.1	8.9	9.1	9	8	7.9	7.9	7.6	7.5	7.6	6	7.3	6.2	7.5	8.6	8.7	8.4	8.7
THC0290_N_0123	198042	198354	-1	Region	3prime				new transcription segment	NA(CDS:THC0290_0160)	2599	A616	B183	C44	313	1	0	1	0	THC0290_0159	0	NA	NA	NA	-	7.9	8.2	8.1	8.4	8.8	8.2	8.9	7.9	8.2	7.9	8.5	8.6	6.6	6.3	6.1	6.8	5.3	5.3	3.9	3.9	8.1	8.1	7.9	7.8
THC0290_0160	198355	201123	-1	CDS	NA		THC0290_v2_0163		Protein of unknown function	NA	2598	A615	B183	C44	2769	1	1	0	0	THC0290_N_0124	NA	NA	NA	NA	-	9.9	9.8	10	9.9	9.8	10.1	9.8	10	9	9.1	10.4	10.5	9	9	8.9	8.7	9.5	9	9.4	8.3	9.9	9.9	9.9	9.7
THC0290_N_0124	198359	198406	1	Region	3prime				new transcription segment	NA(CDS:THC0290_0159)	48	A869	B265	C73	48	1	0	1	0	THC0290_0160	0	NA	NA	NA	-	4.7	5.2	4.7	5	4.8	4.6	5.5	6.9	5.1	5.3	4.4	4.6	4.3	4.4	6.6	4.1	6.9	5	4.7	4	5.3	5.3	4.4	4.9
THC0290_N_0125	201124	201191	-1	Region	3prime				new transcription segment	NA(CDS:THC0290_0161)	2185	A1850	B569	C149	68	0	0	0	0	-	0	NA	NA	NA	-	9.3	8.7	8.5	8.7	9.1	9.5	9.9	11.1	11.5	11.5	8.7	8.5	10.4	10.3	9.4	9.7	9.1	9.7	8.5	7.5	8.3	8.7	8.6	8.4
THC0290_0161	201192	202589	-1	CDS	NA		THC0290_v2_0164		Outer membrane protein precursor, OmpA family P60	NA	2562	A256	B91	C27	1398	0	0	0	0	-	NA	NA	NA	NA	-	15.2	15.5	15.8	16.1	16	16	15.8	16.2	15.7	15.3	15.9	16	14.5	14.2	15	15.5	14.5	14.5	14.6	14.4	15.3	15.4	15.2	15.1
THC0290_N_0126	202620	202692	-1	Region	intra				new transcription segment	NA(CDS:THC0290_0161);kbl(CDS:THC0290_0162)	3192	A611	B183	C44	73	0	0	0	0	-	0	NA	NA	NA	-	10.9	10.7	10.6	10.4	9.9	9.5	9.9	9.2	9.8	9.3	10.9	10.8	7.8	7	8.7	9.3	7.9	7.3	4.7	3.9	10.7	10.7	10.6	10.5
THC0290_0162	202693	203889	-1	CDS	NA	kbl	THC0290_v2_0165	kbl	Glycine C-acetyltransferase	NA	3450	A600	B183	C44	1197	0	0	0	0	-	NA	NA	NA	NA	-	12.6	12.5	12.7	12.3	12.1	11.9	11.9	10	11.5	11.3	12.6	12.5	10.2	9.9	10.6	10.9	10.6	10.5	10.5	11	12.6	12.3	12.6	12.4
THC0290_N_0127	203890	203949	-1	Region	5prime				new transcription segment	kbl(CDS:THC0290_0162)	3683	A439	B165	C44	60	0	0	0	0	-	0	NA	NA	NA	-	11.8	11.8	11.6	11.6	11.1	11.7	11.1	9.8	11.1	11.9	11.9	11.5	10.8	9.9	10.4	10.6	10.5	11.3	11.5	10.2	11.8	11.4	11.6	11.7
THC0290_0163	203950	207108	-1	CDS	NA		THC0290_v2_0166		Probable ATP-dependent DNA helicase, UvrD/REP family	NA	2521	A211	B78	C25	3159	0	0	0	0	-	NA	NA	NA	NA	-	9.8	9.8	10.2	10	10.1	10	10.5	9.8	10.5	10.4	10.3	10.3	8.9	8.7	9.9	10	9.9	9.6	9.2	9.3	9.9	9.6	10	10.2
THC0290_flavo-1_0007	207187	207266	1	misc_RNA	NA				Flavo-1 RNA	NA	1307	A1747	B546	C143	80	0	0	0	0	-	NA	NA	NA	NA	-	5.6	5.4	5.1	4.5	6.1	4.8	6.6	4.5	7.4	5.9	5.3	5.1	6	9.5	7.8	7	10.3	7.9	10.4	12.4	5.4	4.9	5.3	5.4
THC0290_0164	207374	207979	1	CDS	NA	sodA	THC0290_v2_0167	sodA	Superoxide dismutase [Mn]	NA	911	A1604	B535	C143	606	0	0	0	0	-	NA	NA	NA	NA	-	12.8	12.8	13.2	13.3	13.5	13.4	13.5	13.3	14	13.7	13.4	13.2	13.5	13.9	13.6	13.8	14.1	13.9	14	14.2	12.6	13.2	13.1	13
THC0290_N_0128	207980	208039	1	Region	3prime				new transcription segment	sodA(CDS:THC0290_0164)	910	A1604	B535	C143	60	0	0	0	0	-	0	NA	NA	NA	-	8.1	8.2	8.3	8.5	8.9	8.6	9.1	8.9	11.1	10.3	8.2	8.5	11.7	11.6	10.2	10.1	11	10.8	10.1	11.2	7.6	7.7	8.3	8.1
THC0290_N_0129	208062	208134	-1	Region	indep	Rfp13			new transcription segment	NA	1665	A1769	B546	C143	73	0	0	0	0	-	0	NA	NA	NA	-	9.4	9.6	11	11.2	13.7	16.6	14.6	15.8	16	17.1	11.3	11.2	17.1	16.4	15.8	15.5	15.8	17.1	17.1	15.4	9.5	9.7	9.3	8.9
THC0290_N_0130	208381	208488	1	Region	indep	Rfp14			new transcription segment	NA	1572	A1765	B546	C143	108	0	0	0	0	-	0	NA	NA	NA	-	7.7	7.9	7.9	8.2	8.5	9.1	8.9	10.1	9.8	9.5	7.8	7.8	10.7	10.5	9.7	9.7	10.6	10.4	11.1	9.9	8	7.5	7.9	7.6
THC0290_N_0131	208552	208636	-1	Region	3prime				new transcription segment	tyrS(CDS:THC0290_0165)	594	A958	B303	C83	85	0	0	0	0	-	0	NA	NA	NA	-	5.8	6.1	5.7	6	6.2	5.9	6.1	5.1	7.2	6.3	5.4	5.5	6.5	6.5	6.2	5.8	8.3	7.8	3.9	6.2	6.5	5.8	6.3	6
THC0290_0165	208637	209932	-1	CDS	NA	tyrS	THC0290_v2_0169	tyrS	Tyrosine--tRNA ligase	NA	3550	A605	B183	C44	1296	0	0	0	0	-	NA	NA	NA	NA	-	11.8	11.9	11.4	11.3	11.1	11.3	11.1	9.5	11.3	11.1	11.5	11.4	9.9	10	10.2	10.2	9.8	10.2	10.1	10	11.8	11.9	11.9	11.9
THC0290_0166	210086	211081	1	CDS	NA		THC0290_v2_0170		Protein of unknown function	NA	1464	A1768	B546	C143	996	1	1	0	0	THC0290_N_0132	NA	NA	NA	NA	-	8.2	8.2	8.4	8.6	9.1	8.9	9.4	10	10.3	10	8.6	8.5	10	10.4	9.3	9.4	10.3	10.5	10.8	11.3	8	7.9	8.2	8.4
THC0290_N_0132	210722	211077	-1	Region	3prime				new transcription segment	NA(CDS:THC0290_0167)	2991	A576	B183	C44	356	1	0	1	0	THC0290_0166	0	NA	NA	NA	-	9.4	9.3	8.7	8.6	8.3	8.3	8.4	8.7	7.2	7.3	8.6	8.4	7.9	7.4	7.8	7.4	7.1	7.4	8.4	5.2	9.6	9.8	9.5	9.8
THC0290_0167	211078	211500	-1	CDS	NA		THC0290_v2_0171		Probable lipoprotein precursor	NA	3720	A535	B180	C44	423	1	1	0	0	THC0290_N_0133	NA	NA	NA	NA	-	11.5	11.5	11.6	11.3	11	11.4	11.1	9.7	10.8	10.8	11.1	10.9	10.7	10.3	10.6	10.3	10.4	10.5	10.6	10.2	11.8	11.7	12	11.9
THC0290_N_0133	211082	211240	1	Region	3prime				new transcription segment	NA(CDS:THC0290_0166)	1623	A1768	B546	C143	159	1	0	1	0	THC0290_0167	0	NA	NA	NA	-	6.9	6.1	6.7	6.8	7.3	8	7.9	10.3	9.1	8.8	6.8	6.3	8.7	8.5	8	7.8	9.5	8.4	9.5	10.3	6.3	6.7	6	6.3
THC0290_0168	211505	212842	-1	CDS	NA	pyrC1	THC0290_v2_0172	pyrC1	Dihydroorotase	NA	3721	A535	B180	C44	1338	0	0	0	0	-	NA	NA	NA	NA	-	12	11.9	11.4	11.5	11	11.3	11.3	9.2	11.3	11.1	11.4	11.2	11	10.9	10.9	10.6	11.3	11.3	10.7	11.7	12.2	11.8	12.2	12.3
THC0290_0169	212865	213590	-1	CDS	NA		THC0290_v2_0173		Glycosyl transferase, group 2 family protein	NA	2839	A544	B180	C44	726	0	0	0	0	-	NA	NA	NA	NA	-	11.6	11.7	11	10.9	10.4	10.4	10.4	9.9	9.9	9.8	11	10.7	10.2	10.2	9.9	9.8	11	11	10.2	10.8	11.8	11.8	11.7	11.9
THC0290_N_0134	213786	213836	-1	Region	3prime				new transcription segment	NA(CDS:THC0290_0170)	-1	NA	NA	NA	51	0	0	0	0	-	0	NA	NA	NA	-	NA	NA	NA	NA	NA	NA	NA	NA	NA	NA	NA	NA	NA	NA	NA	NA	NA	NA	NA	NA	NA	NA	NA	NA
THC0290_0170	213837	215033	-1	CDS	NA		THC0290_v2_0174		Probable cell surface protein (Leucine-rich repeat protein) precursor	NA	4091	A1083	B365	C107	1197	0	0	0	0	-	NA	NA	NA	NA	-	14.8	14.7	15.3	15.3	15.7	15.5	15.7	15.5	15.7	16	15.3	15.7	15.6	15.7	15.9	16	15.3	15.3	14.6	13.6	14.8	14.8	14.2	14.1
THC0290_N_0135	215034	215068	-1	Region	5prime				new transcription segment	NA(CDS:THC0290_0170)	-1	NA	NA	NA	35	0	0	0	0	-	0	NA	NA	NA	-	NA	NA	NA	NA	NA	NA	NA	NA	NA	NA	NA	NA	NA	NA	NA	NA	NA	NA	NA	NA	NA	NA	NA	NA
THC0290_N_0136	215149	215318	1	Region	repeated_region				new transcription segment	NA	1177	A1693	B546	C143	170	0	0	0	0	-	0	NA	NA	NA	-	4.5	5.1	5.4	5.5	5.2	6.2	5.9	9.3	7	7.1	5.2	5.1	8.3	6.6	7.7	5.7	5.2	7.9	10.7	11.5	4.1	5.4	4.5	4.9
THC0290_N_0137	215297	215346	-1	Region	3prime				new transcription segment	NA(CDS:THC0290_0171)	-1	NA	NA	NA	50	0	0	0	0	-	0	NA	NA	NA	-	NA	NA	NA	NA	NA	NA	NA	NA	NA	NA	NA	NA	NA	NA	NA	NA	NA	NA	NA	NA	NA	NA	NA	NA
THC0290_0171	215347	216612	-1	CDS	NA		THC0290_v2_0175		Probable cell surface protein (Leucine-rich repeat protein) precursor	NA	4089	A1083	B365	C107	1266	0	0	0	0	-	NA	NA	NA	NA	-	14.2	14	14.3	14.3	14.8	14.7	15.5	15.3	15.2	15.2	14.8	14.6	14.1	13.8	15.2	15.2	14.4	13.8	13.2	12.2	14.5	14	13.1	13.3
THC0290_0172	216630	217619	-1	CDS	NA		THC0290_v2_0176		Probable cell surface protein (Leucine-rich repeat protein) precursor	NA	4094	A1083	B365	C107	990	0	0	0	0	-	NA	NA	NA	NA	-	14	13.8	14.2	14.3	15.1	15.1	15.4	15.1	15.3	15.2	14.6	14.4	14.7	14.5	15.3	15.2	14.6	14.2	13.3	12.1	14.5	13.9	13.2	13.3
THC0290_0173	217635	218969	-1	CDS	NA		THC0290_v2_0177		Probable cell surface protein (Leucine-rich repeat protein) precursor	NA	4092	A1083	B365	C107	1335	0	0	0	0	-	NA	NA	NA	NA	-	14.5	14.4	14.6	14.6	15.2	15.2	15.5	15.2	15.5	15.4	15.1	15	15.1	14.9	15.7	15.5	14.6	14.4	13.7	13.4	14.7	14.5	13.4	13.5
THC0290_N_0138	219233	219282	-1	Region	3prime				new transcription segment	NA(CDS:THC0290_0174)	-1	NA	NA	NA	50	0	0	0	0	-	0	NA	NA	NA	-	NA	NA	NA	NA	NA	NA	NA	NA	NA	NA	NA	NA	NA	NA	NA	NA	NA	NA	NA	NA	NA	NA	NA	NA
THC0290_0174	219283	220551	-1	CDS	NA		THC0290_v2_0178		Probable cell surface protein (Leucine-rich repeat protein) precursor	NA	4095	A1083	B365	C107	1269	0	0	0	0	-	NA	NA	NA	NA	-	14.4	14.1	14.2	14.3	15	14.5	15.1	15.2	15.4	15.3	14.5	14.5	14.5	14.6	15.6	15.4	14.3	14.1	12.9	12.7	14.3	14.1	12.9	13
THC0290_0175	220567	221559	-1	CDS	NA		THC0290_v2_0180		Probable cell surface protein (Leucine-rich repeat protein)	NA	4096	A1083	B365	C107	993	0	0	0	0	-	NA	NA	NA	NA	-	14.6	14.2	14.5	14.5	15.2	14.9	15.5	15.3	15.4	15.5	14.9	15.2	15.1	15.1	15.7	15.6	14.4	14.1	13.5	12.7	14.6	14.1	13.2	13.3
THC0290_0176	221575	222702	-1	CDS	NA		THC0290_v2_0182		Probable cell surface protein (Leucine-rich repeat protein) precursor	NA	4093	A1083	B365	C107	1128	0	0	0	0	-	NA	NA	NA	NA	-	14.3	13.9	14.5	14.2	15	15.1	15.4	15.2	15.2	15.3	14.8	14.9	14.9	14.7	15.4	15.4	14.4	14.1	13.4	13.5	14.4	14.1	13	13
THC0290_N_0139	222703	223027	-1	Region	intra				new transcription segment	NA(CDS:THC0290_0176);NA(CDS:THC0290_0177)	4088	A1083	B365	C107	325	0	0	0	0	-	0	NA	NA	NA	-	12.9	12.7	13.3	13.1	13.5	13.4	13.9	13.2	13.1	14	13.6	13.8	13.8	13.5	14	13.7	13.1	12.8	11.7	10.4	13.3	12.8	11.7	11.8
THC0290_0177	223028	224638	-1	CDS	NA		THC0290_v2_0183		Probable cell surface protein (Leucine-rich repeat protein) precursor	NA	4082	A1083	B365	C107	1611	0	0	0	0	-	NA	NA	NA	NA	-	14.7	14.7	14.9	14.8	15.5	15.6	16	15.5	15.6	15.9	15.3	15.5	15.7	16	15.9	15.9	15.6	15.3	14.8	14.1	14.9	14.7	13.9	14.1
THC0290_N_0140	224639	224914	-1	Region	repeated_region				new transcription segment	NA	4084	A1083	B365	C107	276	0	0	0	0	-	0	NA	NA	NA	-	10.9	10.7	11	10.7	11	10.8	11.7	11.5	11.5	12.3	11.5	11.7	11.8	11.9	12.3	12.1	11.5	11	10.2	10.6	11.2	10.9	10	10
THC0290_N_0141	224915	224964	-1	Region	3prime				new transcription segment	NA(CDS:THC0290_0178)	-1	NA	NA	NA	50	0	0	0	0	-	0	NA	NA	NA	-	NA	NA	NA	NA	NA	NA	NA	NA	NA	NA	NA	NA	NA	NA	NA	NA	NA	NA	NA	NA	NA	NA	NA	NA
THC0290_0178	224965	225888	-1	CDS	NA		THC0290_v2_0184		Probable cell surface protein (Leucine-rich repeat protein) precursor	NA	4090	A1083	B365	C107	924	0	0	0	0	-	NA	NA	NA	NA	-	13.6	13.7	14.3	14.4	14.9	14.7	15.2	14.7	14.9	15.1	14.5	14.4	15	14	15.2	14.9	13.8	14.2	13.7	12.3	14	14	12.8	12.9
THC0290_0179	225904	227169	-1	CDS	NA		THC0290_v2_0185		Probable cell surface protein (Leucine-rich repeat protein) precursor	NA	4086	A1083	B365	C107	1266	0	0	0	0	-	NA	NA	NA	NA	-	15.5	15.3	15.8	15.9	15.9	15.9	16.5	15.8	16	16.1	16.2	16.1	15.8	15.7	16.1	16.1	15.4	15.2	14.5	13.4	15.4	15.1	14.6	14.8
THC0290_0180	227183	228379	-1	CDS	NA		THC0290_v2_0186		Probable cell surface protein (Leucine-rich repeat protein) precursor	NA	4087	A1083	B365	C107	1197	0	0	0	0	-	NA	NA	NA	NA	-	15.5	15.4	16.1	15.9	16	16.2	16.1	16.1	16	16.5	16.5	16.5	15.9	16	16.2	16.2	15.7	15.4	14.7	14.1	15.4	15.4	14.8	14.9
THC0290_0181	228393	229796	-1	CDS	NA		THC0290_v2_0188		Probable cell surface protein (Leucine-rich repeat protein) precursor	NA	4083	A1083	B365	C107	1404	0	0	0	0	-	NA	NA	NA	NA	-	13	12.8	13.2	13.3	13.8	13.4	14.3	14.2	14.5	14.3	13.8	13.8	14.1	14.1	14.2	14.1	13.4	13.4	12.5	12.2	13.3	13.2	11.9	11.9
THC0290_N_0142	229797	230072	-1	Region	repeated_region				new transcription segment	NA	4085	A1083	B365	C107	276	0	0	0	0	-	0	NA	NA	NA	-	11	10.8	11.1	10.9	11.4	10.8	12.1	11.4	11.7	12.2	11.6	11.8	11.8	11.9	12.4	12.1	11.5	11	10.2	10.6	11.4	11	9.8	9.9
THC0290_N_0143	230073	230122	-1	Region	3prime				new transcription segment	NA(CDS:THC0290_0182)	-1	NA	NA	NA	50	0	0	0	0	-	0	NA	NA	NA	-	NA	NA	NA	NA	NA	NA	NA	NA	NA	NA	NA	NA	NA	NA	NA	NA	NA	NA	NA	NA	NA	NA	NA	NA
THC0290_0182	230123	231112	-1	CDS	NA		THC0290_v2_0189		Probable cell surface protein (Leucine-rich repeat protein) precursor	NA	4079	A1083	B365	C107	990	0	0	0	0	-	NA	NA	NA	NA	-	11.7	10.3	12.4	12.5	15.2	14.9	15.6	14.6	15.4	15.4	13.4	13.8	13.3	12.9	14	14.3	11.1	10.9	10.6	7.8	11.2	11.6	9.5	9.5
THC0290_0183	231127	232047	-1	CDS	NA		THC0290_v2_0190		Probable cell surface protein (Leucine-rich repeat protein) precursor	NA	4080	A1083	B365	C107	921	0	0	0	0	-	NA	NA	NA	NA	-	12.9	12.6	13.9	13.9	15.7	15.3	16	15.4	15.5	15.7	14.4	14.8	14.5	14	15.3	15.7	13	12.8	12.2	10.6	13.1	13.1	11.8	11.7
THC0290_0184	232062	233117	-1	CDS	NA		THC0290_v2_0191		Probable cell surface protein (Leucine-rich repeat protein) precursor	NA	4081	A1083	B365	C107	1056	0	0	0	0	-	NA	NA	NA	NA	-	11.6	11.2	11.9	11.9	14.6	14.5	15.4	14.6	15.1	15.1	13.1	13.6	12.9	12.7	13.8	14.2	11.6	11.4	10.9	7	11.9	11.2	10.3	10.5
THC0290_0185	233132	234121	-1	CDS	NA		THC0290_v2_0192		Probable cell surface protein (Leucine-rich repeat protein) precursor	NA	4112	A1088	B365	C107	990	0	0	0	0	-	NA	NA	NA	NA	-	8.7	8.6	11.9	12	15	14.8	15.6	14.9	15.3	15.3	13.3	13.8	13.6	13.4	13.9	14.4	11.1	11	10.2	9.5	9.2	8.2	8.5	8.5
THC0290_0186	234136	235122	-1	CDS	NA		THC0290_v2_0194		Probable cell surface protein (Leucine-rich repeat protein) precursor	NA	4109	A1088	B365	C107	987	0	0	0	0	-	NA	NA	NA	NA	-	11.1	10.5	11.8	11.8	14.3	14.8	15.2	14.4	15.2	15.4	13	13.5	14.5	14.1	13.8	14.1	13.1	13	12.9	13.4	10.8	10.8	9.6	9.6
THC0290_0187	235708	236373	1	CDS	NA		THC0290_v2_0195		Probable transmembrane protein of unknown function	NA	2005	A1765	B546	C143	666	0	0	0	0	-	NA	NA	NA	NA	-	8.5	8.5	8.2	8.2	8.8	8.9	9.3	10.8	10.4	10.4	8.2	8.1	11.1	10.8	10.3	10.3	10.7	11.3	11.7	11.1	8.3	8.7	8.3	8.4
THC0290_0188	236394	237143	1	CDS	NA		THC0290_v2_0196		Protein of unknown function	NA	2830	A540	B180	C44	750	0	0	0	0	-	NA	NA	NA	NA	-	13.3	13.3	12.1	12	11.1	11.1	11.3	11.5	12.2	12	12	12	11.5	11.6	11.5	11.6	11.2	11.1	11.5	11.3	13.3	13.5	13.4	13.3
THC0290_N_0144	237144	237208	1	Region	intra				new transcription segment	NA(CDS:THC0290_0189);NA(CDS:THC0290_0188)	3175	A586	B183	C44	65	0	0	0	0	-	0	NA	NA	NA	-	12.1	12.1	10.6	10.2	9.8	10.8	10.6	9.7	11.8	12.1	10.4	9.9	10	9.6	9.2	9.8	8.3	9.9	10.6	9.4	12.2	11.6	12.5	12
THC0290_0189	237209	237979	1	CDS	NA		THC0290_v2_0197		Enoyl-CoA hydratase/isomerase family protein	NA	3178	A587	B183	C44	771	1	1	0	0	THC0290_N_0145	NA	NA	NA	NA	-	10.7	10.9	9.4	9.4	9	8.8	9.4	7.9	9.8	9.3	9.4	9	7.2	8.2	7.5	7.7	8.3	7.8	7.1	9	11	10.4	11	10.6
THC0290_N_0145	237710	238051	-1	Region	3prime				new transcription segment	NA(CDS:THC0290_0190)	2915	A489	B173	C44	342	2	1	1	0	THC0290_0189;THC0290_N_0146	0	NA	NA	NA	-	7	7	7.1	7.1	6.8	7.2	6.6	7.4	5.6	5.9	7.5	7.1	6.4	4	4	3.9	3.9	4.4	3.9	5.2	7	7.2	6.1	6.6
THC0290_N_0146	237980	238652	1	Region	3prime				new transcription segment	NA(CDS:THC0290_0189)	2994	A576	B183	C44	673	3	1	2	0	THC0290_0190;THC0290_0191;THC0290_N_0145	0	NA	NA	NA	-	8.6	8.5	7.3	7.1	6.6	6.9	6.8	8.2	6.7	6.6	7.3	6.8	4.5	4.8	4	4.2	5.8	4.4	6.5	4	8.6	8.3	8.3	8.4
THC0290_0190	238052	238456	-1	CDS	NA		THC0290_v2_0198		Probable protein chain release factor	NA	2573	A480	B171	C44	405	1	1	0	0	THC0290_N_0146	NA	NA	NA	NA	-	9.3	9.2	9.6	9.6	9.4	9.8	9	9.3	8.6	9.1	9.9	9.5	8.9	9.1	7.8	7.9	8.5	7.9	8.9	10.4	9.3	9.4	9	8.9
THC0290_0191	238456	240570	-1	CDS	NA		THC0290_v2_0199		Probable bifunctional protein : transcriptional regulator NadR family and of unknown function	NA	3593	A581	B183	C44	2115	1	1	0	0	THC0290_N_0146	NA	NA	NA	NA	-	10.6	10.3	10.4	10.2	9.7	9.9	9.6	8.3	9.5	9.7	10.7	10.7	9	9.2	9	8.9	9	8.9	9.1	9.1	10.5	10.4	10.1	10.1
THC0290_0192	240531	241154	-1	CDS	NA	pnuC	THC0290_v2_0200	pnuC	Nicotinamide mononucleotide transporter PnuC	NA	2921	A491	B173	C44	624	0	0	0	0	-	NA	NA	NA	NA	-	9	8.7	8.4	8.4	8.2	8.7	8.2	8.7	7.7	7.2	8.7	8.5	8	5.4	5.5	7	7.7	7.5	7.3	8.9	8.9	8.9	8.6	9
THC0290_0193	241163	241885	-1	CDS	NA	pcrB	THC0290_v2_0201	pcrB	PcrB protein homolog	NA	2923	A492	B173	C44	723	0	0	0	0	-	NA	NA	NA	NA	-	9.4	9.3	8.9	8.9	8.7	8.7	8.9	8.7	7.4	7.4	9.1	9.1	7.6	7.6	8.2	7.6	8.4	8.3	8.1	9	9.4	9	9.1	9.4
THC0290_0194	241896	242537	-1	CDS	NA	sfp	THC0290_v2_0202	sfp	Probable phosphopantetheinyl transferase	NA	2924	A492	B173	C44	642	0	0	0	0	-	NA	NA	NA	NA	-	9.8	9.7	9.8	9.6	9.5	9.7	9.8	10.3	9.4	9.2	9.8	9.8	9.6	8.9	9.4	9.1	9.1	9.8	9.4	9.4	9.9	9.7	9.7	9.9
THC0290_flavo-1_0008	242552	242631	1	misc_RNA	NA				Flavo-1 RNA	NA	556	A1385	B477	C139	80	0	0	0	0	-	NA	NA	NA	NA	-	3.9	3.9	3.9	3.9	3.9	3.9	4	3.9	3.9	3.9	3.9	4	3.9	4.1	3.9	3.9	3.9	3.9	3.9	9.6	3.9	3.9	3.9	3.9
THC0290_0195	242763	244079	1	CDS	NA	ahcY	THC0290_v2_0203	ahcY	Adenosylhomocysteinase	NA	2235	A970	B307	C84	1317	0	0	0	0	-	NA	NA	NA	NA	-	13.1	13	12.5	12.8	13.1	13	13.7	12.5	14.3	14.1	12.5	12.4	14.6	14.9	14.5	14.2	14.1	14	13.5	13.2	12.9	13.3	13.5	13.5
THC0290_N_0147	244080	244141	1	Region	3prime				new transcription segment	ahcY(CDS:THC0290_0195)	989	A1670	B542	C143	62	0	0	0	0	-	0	NA	NA	NA	-	7.8	7.9	7.6	7.8	8.4	8.7	10.1	11.2	12	11.7	7.8	8.1	11.4	11.4	11	10.7	10.5	10.4	10	9.6	7.3	7.9	7.9	8
THC0290_0196	244213	244821	-1	CDS	NA		THC0290_v2_0204		Protein of unknown function	NA	1293	A1753	B546	C143	609	0	0	0	0	-	NA	NA	NA	NA	-	9.5	9.5	9.6	9.6	9.9	9.9	10	10.9	10.3	10.2	9.6	9.7	11.3	11.8	11.2	11.2	11.5	11.7	10.8	11.4	9.4	9.8	9.8	9.7
THC0290_N_0148	244877	244927	1	Region	5prime				new transcription segment	ltd(CDS:THC0290_0197)	679	A1205	B414	C124	51	0	0	0	0	-	0	NA	NA	NA	-	4.5	3.9	4.2	3.9	3.9	4.2	3.9	4.8	3.9	4.3	4	4	6.6	3.9	6.4	5.5	3.9	7.4	3.9	3.9	4	4.4	4	4
THC0290_0197	244941	245891	1	CDS	NA	ltd	THC0290_v2_0205	ltd	L-threonine 3-dehydrogenase	NA	4022	A27	B14	C7	951	1	1	0	0	THC0290_N_0149	NA	NA	NA	NA	-	11.3	11.2	11.5	11.5	11.7	11.7	11.5	10.1	11.8	11.5	11.5	11.6	11.3	11.2	11.3	11.3	11.2	11.1	11.6	11.8	11.4	11.4	11.6	11.5
THC0290_N_0149	245600	246251	-1	Region	repeated_region				new transcription segment	NA	1176	A1729	B546	C143	652	3	2	1	0	THC0290_0197;THC0290_N_0150;THC0290_N_0151	1	245961,246047,-	0.688	87	MQTQNLQNHDVLDLIELDNLKKRFKKKG	6.9	6.8	6.5	6.6	7	7.7	7.4	7.5	7.6	7.9	6.7	6.1	8.6	8	7.7	7.4	7.6	8.3	9.2	8.8	7	6.9	6.9	7.4
THC0290_N_0150	245892	245964	1	Region	3prime				new transcription segment	ltd(CDS:THC0290_0197)	801	A1588	B533	C143	73	1	1	0	0	THC0290_N_0149	0	NA	NA	NA	-	5.5	6.1	5.2	5.8	5.8	6.6	6.4	9.5	7.5	7.7	5.7	5.5	7.3	5.3	7.8	5.7	7.2	6.6	8.1	9.1	5.4	5.4	5.6	6.1
THC0290_N_0151	245965	246278	1	Region	3prime-PT				new transcription segment	NA	2100	A1394	B478	C139	314	1	1	0	0	THC0290_N_0149	0	NA	NA	NA	-	5.9	5.6	6.1	5.5	5.4	6.8	6.2	8	6.9	6.9	6.1	5.6	6.4	6.5	6.7	5.7	8.7	7.6	9.3	8.6	6.2	6	5.4	6.2
THC0290_0198	246252	249605	-1	CDS	NA	mfd	THC0290_v2_0206	mfd	Transcription-repair coupling factor	NA	2761	A381	B145	C41	3354	0	0	0	0	-	NA	NA	NA	NA	-	10.2	10.1	9.7	9.8	9.9	9.8	10.4	8.8	10.5	10	9.8	9.9	9.6	9.3	9.8	9.9	9.4	9.7	9.2	9.2	10.1	9.9	10.4	10.2
THC0290_0199	249721	250146	1	CDS	NA		THC0290_v2_0207		Probable transmembrane protein of unknown function	NA	935	A1768	B546	C143	426	0	0	0	0	-	NA	NA	NA	NA	-	11.3	11.2	11.3	11.4	11.9	11.9	12	13.2	12.8	12.5	11.3	11.2	12.6	12.5	12.2	12.1	12.8	13	12.9	12.9	10.9	11.4	11.1	11.2
THC0290_N_0152	250147	250173	1	Region	3prime				new transcription segment	NA(CDS:THC0290_0199)	-1	NA	NA	NA	27	0	0	0	0	-	0	NA	NA	NA	-	NA	NA	NA	NA	NA	NA	NA	NA	NA	NA	NA	NA	NA	NA	NA	NA	NA	NA	NA	NA	NA	NA	NA	NA
THC0290_N_0153	250174	250230	1	Region	3prime-PT				new transcription segment	NA	-1	NA	NA	NA	57	0	0	0	0	-	0	NA	NA	NA	-	NA	NA	NA	NA	NA	NA	NA	NA	NA	NA	NA	NA	NA	NA	NA	NA	NA	NA	NA	NA	NA	NA	NA	NA
THC0290_0200	250231	250752	1	CDS	NA		THC0290_v2_0208		Hypothetical protein	NA	1702	A1715	B546	C143	522	0	0	0	0	-	NA	NA	NA	NA	-	10.4	10.5	10.5	10.7	11.7	11.9	11.8	12.9	13.5	13	10.4	10.5	11.7	11.9	11.6	11.6	11.5	11.5	12.4	12.3	10.3	10.3	10.6	10.4
THC0290_0201	250719	251186	-1	CDS	NA		THC0290_v2_0209		Adenylate cyclase family protein	NA	1366	A1765	B546	C143	468	1	1	0	0	THC0290_N_0154	NA	NA	NA	NA	-	8.3	8.4	8.4	8.7	9.6	9.6	10	10	11	10.5	8.4	8.5	11.4	11.5	11	10.7	11.4	11.7	11.1	10.9	8.4	8.1	9.1	9
THC0290_N_0154	250753	251441	1	Region	3prime				new transcription segment	NA(CDS:THC0290_0200)	336	A1248	B419	C125	689	2	1	1	0	THC0290_0201;THC0290_N_0155	0	NA	NA	NA	-	8.8	8.7	8.8	9	9.2	9.3	9.7	11.7	10.7	10.6	8.7	8.8	9.6	9.2	9.8	9.9	9.2	9.6	10.3	9.4	9.1	8.9	8.5	8.6
THC0290_N_0155	251187	251301	-1	Region	5prime				new transcription segment	NA(CDS:THC0290_0201)	1440	A1768	B546	C143	115	1	1	0	0	THC0290_N_0154	0	NA	NA	NA	-	8.2	8.3	8.4	8.5	9.4	10.4	9.8	10.2	10.9	11.8	8.6	8.5	12.7	11.7	11	10.7	12.5	13.7	13	12.1	8.3	8.3	9.1	8.8
THC0290_N_0156	251422	251487	-1	Region	indep	Rfp15			new transcription segment	NA	245	A1769	B546	C143	66	0	0	0	0	-	0	NA	NA	NA	-	7.7	7.9	7.9	7.7	8	9.4	9.3	10.2	10.5	11.8	7.8	7.5	11.8	8.9	9.1	9.5	9.1	11.3	14.5	11.7	7.5	7.4	7.5	7.1
THC0290_N_0157	251489	251576	-1	Region	intra				new transcription segment	NA(Region:THC0290_N_0156);purF(CDS:THC0290_0202)	2304	A811	B244	C67	88	0	0	0	0	-	0	NA	NA	NA	-	9.7	10.5	10.1	9.9	9.8	9.8	10.8	10.7	11	10.7	9.5	9.1	8.8	8.5	9.4	9.5	8	8.7	9.4	8.7	10.4	9.3	11	10.5
THC0290_0202	251577	253475	-1	CDS	NA	purF	THC0290_v2_0210	purF	Amidophosphoribosyltransferase	NA	3176	A586	B183	C44	1899	0	0	0	0	-	NA	NA	NA	NA	-	12	12.3	11.5	11.3	11.5	11.6	12.2	11.2	12.1	11.9	11.3	10.8	10	10	10.4	10.5	10	10.2	10.1	9.7	12.2	11	12.7	12.3
THC0290_N_0158	253476	253544	-1	Region	3prime				new transcription segment	NA(CDS:THC0290_0203)	2305	A811	B244	C67	69	0	0	0	0	-	0	NA	NA	NA	-	12.6	12.9	12.1	11.9	11.9	12.2	12.3	12.1	12.9	13.5	11.8	11.4	11.8	11.7	11.7	11.7	11.6	11.6	12	11.5	12.9	12	13.5	13.1
THC0290_0203	253545	254468	-1	CDS	NA		THC0290_v2_0211		Carbohydrate kinase, PfkB family	NA	2309	A803	B244	C67	924	0	0	0	0	-	NA	NA	NA	NA	-	12.6	12.6	11.8	11.9	11.9	11.9	12	12.7	12.5	12.4	11.9	11.9	12.2	12.2	11.9	11.8	12.4	12.1	11.9	12.2	12.7	12.7	13	12.9
THC0290_N_0159	254489	254544	-1	Region	intra				new transcription segment	NA(CDS:THC0290_0203);rnhA(CDS:THC0290_0204)	3279	A601	B183	C44	56	0	0	0	0	-	0	NA	NA	NA	-	9.6	9.5	8.6	8.5	7.5	7.8	7	7.7	7.1	7	9	8.7	6.4	4	6.1	6.3	6.6	6.5	3.9	4	9.8	9.7	9.6	9.5
THC0290_0204	254545	255024	-1	CDS	NA	rnhA	THC0290_v2_0212	rnhA	Ribonuclease HI	NA	3304	A601	B183	C44	480	0	0	0	0	-	NA	NA	NA	NA	-	9.7	9.7	8.6	8.4	7.6	7.6	7.1	7.4	6.6	6.7	8.9	8.7	6.4	6	6.5	6.7	6.6	3.9	6.2	6.7	9.8	9.7	9.6	9.7
THC0290_0205	255026	255595	-1	CDS	NA	purN	THC0290_v2_0213	purN	Phosphoribosylglycinamide formyltransferase	NA	3714	A526	B180	C44	570	1	1	0	0	THC0290_N_0160	NA	NA	NA	NA	-	9.8	9.9	9.1	8.8	8	8.1	7.9	7.7	7.8	7.7	9.3	9.2	7.9	7.5	7.2	7.4	8.1	8.2	8.7	9.3	9.9	9.9	9.9	9.8
THC0290_N_0160	255408	255603	1	Region	indep	Rfp16			new transcription segment	NA	1019	A1681	B544	C143	196	1	0	1	0	THC0290_0205	0	NA	NA	NA	-	6.6	6.4	6.7	6.7	6.9	7	7.3	7.8	7.5	7.3	6.9	6.6	6.7	7.7	7.5	7.1	8.1	8.1	8.5	7.4	6.4	6.6	6.6	6.6
THC0290_N_0161	255694	255745	1	Region	5prime				new transcription segment	acpP(CDS:THC0290_0206)	2733	A103	B45	C16	52	0	0	0	0	-	0	NA	NA	NA	-	13	12.9	13.5	13.3	13.2	14.2	12.7	13.9	12.5	13.3	13.6	13.6	12.4	11.9	11.8	12.2	12.2	13	13.1	11.6	12.9	13.3	12.7	12.9
THC0290_0206	255770	256006	1	CDS	NA	acpP	THC0290_v2_0214	acpP	Acyl carrier protein	NA	3642	A562	B183	C44	237	0	0	0	0	-	NA	NA	NA	NA	-	14.2	14.4	14.3	14.3	14.3	14.4	13.8	14.9	13.3	13.6	14.3	14.3	12.5	12.1	12.4	12.9	12.2	12.5	12.7	12.1	14.1	14.4	14.4	14.2
THC0290_N_0162	256007	256044	1	Region	3prime				new transcription segment	acpP(CDS:THC0290_0206)	-1	NA	NA	NA	38	0	0	0	0	-	0	NA	NA	NA	-	NA	NA	NA	NA	NA	NA	NA	NA	NA	NA	NA	NA	NA	NA	NA	NA	NA	NA	NA	NA	NA	NA	NA	NA
THC0290_N_0163	256047	256358	1	Region	5prime				new transcription segment	fabF(CDS:THC0290_0207)	2734	A103	B45	C16	312	0	0	0	0	-	0	NA	NA	NA	-	14.4	14.5	14.3	14.4	14.4	14.8	13.8	15	14.2	14.3	14.4	14.3	14	13.7	13.1	13.3	13.3	13.8	14.4	13.3	14.3	14.6	14.3	14.2
THC0290_0207	256359	257609	1	CDS	NA	fabF	THC0290_v2_0216	fabF	3-oxoacyl-(acyl-carrier-protein) synthase II	NA	3330	A605	B183	C44	1251	0	0	0	0	-	NA	NA	NA	NA	-	14.1	14	14.1	14.1	13.8	13.4	13.5	12.3	13.2	12.7	14.1	14.1	11.8	12	12.6	12.9	12.1	11.8	11.7	11.7	14.2	13.9	14.1	14
THC0290_0208	257618	258358	1	CDS	NA	rnc	THC0290_v2_0217	rnc	Ribonuclease III	NA	3493	A600	B183	C44	741	0	0	0	0	-	NA	NA	NA	NA	-	11.2	10.9	10.5	10.5	9.9	9.6	9.6	9.9	9	8.8	10.8	10.6	8.4	8	9.1	9.3	9.6	9.3	8.3	9.6	11.2	11.1	10.8	11
THC0290_N_0164	258359	258452	1	Region	intra				new transcription segment	NA(CDS:THC0290_0209);rnc(CDS:THC0290_0208)	3280	A601	B183	C44	94	0	0	0	0	-	0	NA	NA	NA	-	10.9	10.6	10.1	10.1	9.6	9.4	9	10	8.4	8	10.2	10	7.6	6.3	8.4	8.5	7.8	8.2	3.9	3.9	10.9	10.7	10.2	10.4
THC0290_0209	258470	258949	1	CDS	NA		THC0290_v2_0218		Protein of unknown function	NA	2236	A970	B307	C84	480	0	0	0	0	-	NA	NA	NA	NA	-	10.5	10.4	9.8	9.6	9.7	9.8	10	10.9	10	10.4	10.1	10	11.5	11.7	11	11	10.8	10.7	10.8	10.4	10.8	10.7	10.5	10.7
THC0290_0210	258953	260383	1	CDS	NA	pykA	THC0290_v2_0219	pykA	Pyruvate kinase	NA	3799	A833	B252	C69	1431	1	1	0	0	THC0290_N_0165	NA	NA	NA	NA	-	12.1	12	11.6	11.7	11.6	11.4	11.9	11.7	11.8	11.7	11.6	11.8	12.3	12.4	12.8	12.6	11.7	11.6	11.3	11.1	12.1	12.2	12.4	12.6
THC0290_N_0165	260291	260539	-1	Region	3prime				new transcription segment	NA(CDS:THC0290_0211)	584	A1451	B503	C142	249	2	1	1	0	THC0290_0210;THC0290_N_0166	0	NA	NA	NA	-	10.1	10.2	9.4	9.7	9.2	9.4	9	9.8	10	10	9.9	9.4	9	10.6	10	9.5	10.9	10.6	11	10.9	10	9.9	9.4	9.4
THC0290_N_0166	260384	260421	1	Region	3prime				new transcription segment	pykA(CDS:THC0290_0210)	-1	NA	NA	NA	38	1	1	0	0	THC0290_N_0165	0	NA	NA	NA	-	NA	NA	NA	NA	NA	NA	NA	NA	NA	NA	NA	NA	NA	NA	NA	NA	NA	NA	NA	NA	NA	NA	NA	NA
THC0290_0211	260540	261250	-1	CDS	NA		THC0290_v2_0220		Protein of unknown function	NA	3710	A525	B180	C44	711	0	0	0	0	-	NA	NA	NA	NA	-	12	12.1	11.9	11.8	11.1	11.3	10.7	11.1	10.6	10.8	12	12	10.7	10.9	10.4	10.4	11	10.8	11	11.1	12	12.1	11.7	11.6
THC0290_N_0167	261251	261325	-1	Region	intra				new transcription segment	NA(CDS:THC0290_0211);NA(CDS:THC0290_0212)	2654	A50	B27	C13	75	0	0	0	0	-	0	NA	NA	NA	-	9.9	9.7	9.1	8.8	8	7.7	7.1	7.6	7.9	7.9	9.4	9.5	8.4	8.4	8.3	8.3	8.9	8.6	9.5	9.5	9.8	9.8	9.3	9.6
THC0290_0212	261326	261682	-1	CDS	NA		THC0290_v2_0221		Protein of unknown function MmcQ	NA	3500	A609	B183	C44	357	0	0	0	0	-	NA	NA	NA	NA	-	9.7	9.6	8.8	8.7	7.6	7.4	7	7.3	7.4	7.3	9.2	9.2	8	7.5	8	8.1	7	7.7	7.5	7	9.7	9.4	9.3	9.5
THC0290_0213	261688	262440	-1	CDS	NA		THC0290_v2_0222		Probable arylformamidase	NA	3510	A609	B183	C44	753	0	0	0	0	-	NA	NA	NA	NA	-	10.2	10	9.4	9.2	8.2	8	7.8	7.2	7.7	7.7	9.9	9.7	8.2	7.8	8.2	7.8	9.1	8	7.8	7.8	10.2	9.8	10	10.1
THC0290_0214	262521	263654	-1	CDS	NA		THC0290_v2_0223		Probable coproporphyrinogen oxidase	NA	3509	A609	B183	C44	1134	0	0	0	0	-	NA	NA	NA	NA	-	10	9.8	9.1	8.8	7.5	7.4	6.7	6	6.4	6	9.3	9.2	6	7	6.7	6.6	7.5	7.1	4	6	10	9.7	9.8	10
THC0290_0215	263657	264211	-1	CDS	NA	ruvC	THC0290_v2_0224	ruvC	Crossover junction endoribonuclease	NA	3875	A890	B276	C76	555	0	0	0	0	-	NA	NA	NA	NA	-	10.6	10.4	10.1	9.9	9.5	9.5	9.4	8.3	10.3	10.1	10.3	10.2	10.4	10.9	9.9	9.3	11.3	10.7	10.4	11.2	10.6	10.2	10.8	10.7
THC0290_N_0168	264212	264278	-1	Region	5prime				new transcription segment	ruvC(CDS:THC0290_0215)	3876	A890	B276	C76	67	0	0	0	0	-	0	NA	NA	NA	-	9.9	9.8	9.6	9.3	9.2	9.3	9.1	8.5	10.1	10.6	9.7	9.7	10.7	10.8	9.8	9.4	10.9	11.1	10.3	10	10	9.8	10	10.3
THC0290_0216	264266	265192	1	CDS	NA		THC0290_v2_0225		Probable transmembrane protein of unknown function	NA	2986	A549	B181	C44	927	0	0	0	0	-	NA	NA	NA	NA	-	7.7	7.6	6.8	6.8	6.6	6.7	6.5	7.8	6.7	6.8	7	6.8	6.6	4.6	5	5.6	5.7	6.3	5.2	4	7.5	7.6	8.1	8.5
THC0290_0217	265180	266289	1	CDS	NA		THC0290_v2_0226		Glycosyl transferase, group 2 family protein	NA	2987	A549	B181	C44	1110	0	0	0	0	-	NA	NA	NA	NA	-	7.9	7.7	7.3	7.2	6.8	6.7	6.7	7	5.3	5.3	7.5	7.1	5.5	4.1	5.5	5.5	5.6	5.6	6.4	4	7.9	7.9	8.2	9
THC0290_flavo-1_0009	266310	266381	1	misc_RNA	NA				Flavo-1 RNA	NA	582	A1382	B476	C138	72	0	0	0	0	-	NA	NA	NA	NA	-	10.5	10.1	10.2	10.3	10.4	10.3	10.3	11.9	10.7	10.2	10.6	10.5	9.9	11.5	10.7	10.4	12.7	11.1	11.5	13.3	10	10.5	10	10.1
THC0290_0218	266397	266870	-1	CDS	NA		THC0290_v2_0227		Protein of unknown function	NA	3970	A337	B126	C35	474	1	1	0	0	THC0290_N_0169	NA	NA	NA	NA	-	9.4	9.3	9.3	9.1	8.6	9.2	8.4	7.4	8.6	8.6	9.2	9	9.8	9.2	9	8.4	10.2	10.3	9.4	9.3	9.8	9	9.2	9.3
THC0290_N_0169	266572	266801	1	Region	indep	Rfp17			new transcription segment	NA	1316	A1747	B546	C143	230	1	0	1	0	THC0290_0218	0	NA	NA	NA	-	8.5	8.4	7.8	8.1	7.8	8.2	8.1	7.9	9.8	9.3	8.1	7.8	9.8	10.7	9.7	9.2	11.5	11	11.5	12.6	8.3	8.4	8.7	9
THC0290_0219	266940	267446	1	CDS	NA		THC0290_v2_0228		Hypothetical protein	NA	1317	A1747	B546	C143	507	0	0	0	0	-	NA	NA	NA	NA	-	8.5	8.1	7.6	7.7	7.6	8.1	8	7.6	9.6	9.2	7.8	7.6	9.3	10.1	9.3	8.9	10.8	9.9	10.1	11.6	8.2	8	8.3	8.6
THC0290_N_0170	267422	267648	-1	Region	3prime				new transcription segment	NA(CDS:THC0290_0220)	1719	A1790	B549	C143	227	0	0	0	0	-	0	NA	NA	NA	-	9.4	9.4	9.5	9.5	10.2	10.3	10.6	10	10.8	10.4	9.7	9.5	11	11	11.1	10.7	11.3	10.8	11.4	11.6	10	9.6	9.1	9.2
THC0290_0220	267649	268050	-1	CDS	NA		THC0290_v2_0229		Hypothetical protein	NA	1720	A1790	B549	C143	402	0	0	0	0	-	NA	NA	NA	NA	-	9.2	9.4	9.4	9.6	10.7	10.5	10.7	10.1	11	10.5	9.4	9.5	11.1	11.1	11.7	11.5	11.3	10.9	11.4	11.6	9.4	9.2	8.7	8.5
THC0290_N_0171	268051	268199	-1	Region	intra				new transcription segment	NA(CDS:THC0290_0220);NA(CDS:THC0290_0221)	1721	A1790	B549	C143	149	0	0	0	0	-	0	NA	NA	NA	-	10.6	10.7	11	11.2	12.1	12.2	12.7	10.9	12.6	12	11	10.8	12.6	12	12.9	12.5	12.4	12.3	12.8	12.3	10.7	10.4	10.2	9.8
THC0290_0221	268200	268898	-1	CDS	NA		THC0290_v2_0230		Protein of unknown function precursor	NA	1722	A1790	B549	C143	699	0	0	0	0	-	NA	NA	NA	NA	-	11	10.9	11.4	11.6	12.3	12.5	12.8	9.6	13	12.6	11.6	11.2	13.2	12.5	13.4	13	12.8	12.7	13	13	11.1	10.6	10.6	10.4
THC0290_0222	268913	269659	-1	CDS	NA		THC0290_v2_0231		Protein of unknown function precursor	NA	1789	A1762	B546	C143	747	0	0	0	0	-	NA	NA	NA	NA	-	10	9.8	10.4	10.4	11.5	11.7	12.1	11.1	12.4	12.6	10.5	10.5	13.7	12.8	13	12.8	12.9	13.1	13.5	13.3	10.1	9.9	9.3	9.4
THC0290_0223	269844	273245	1	CDS	NA	ileS	THC0290_v2_0232	ileS	Isoleucine--tRNA ligase	NA	2840	A544	B180	C44	3402	0	0	0	0	-	NA	NA	NA	NA	-	12.5	12.5	11.5	11.3	9.7	9.7	9.8	9.8	9.9	9.6	11.8	11.5	10	10	10.4	10.5	10.2	9.9	10.7	11.1	12.5	12.3	12.3	12.3
THC0290_0224	273252	273632	1	CDS	NA	dksA	THC0290_v2_0233	dksA	DnaK suppressor protein	NA	3764	A856	B258	C70	381	0	0	0	0	-	NA	NA	NA	NA	-	12.7	12.9	12.2	12.1	11.1	10.9	10.6	11.4	11.2	11.1	12.4	12.5	11.7	11.3	11.8	11.9	11.5	11.8	13.3	12.6	12.8	13.1	12.7	12.5
THC0290_N_0172	273673	273853	1	Region	5prime				new transcription segment	lspA(CDS:THC0290_0225)	3800	A834	B252	C69	181	0	0	0	0	-	0	NA	NA	NA	-	7.5	7.3	6.5	6.6	5.6	6.1	5.6	6.9	5.6	6.2	6.9	6.4	7.7	7.4	7.7	7.9	7.3	6.4	3.9	6.4	7.5	7.7	8.2	8.6
THC0290_0225	273869	274462	1	CDS	NA	lspA	THC0290_v2_0235	lspA	Signal peptidase II	NA	1010	A1727	B546	C143	594	1	1	0	0	THC0290_N_0173	NA	NA	NA	NA	-	10.4	10	9.7	9.9	10.1	10.8	10.4	10.9	11.3	11.4	9.9	9.6	11.1	11.2	10.6	10.8	11	11.1	11.3	11.3	10.1	10.6	10.2	10.4
THC0290_N_0173	274351	274462	-1	Region	3prime				new transcription segment	ygfA(CDS:THC0290_0226)	446	A1313	B452	C133	112	1	0	1	0	THC0290_0225	0	NA	NA	NA	-	5.4	5.6	6.2	6.1	6.2	6.8	6.3	7.5	6.5	6.8	6.1	6	5.9	6.4	7.7	4.2	3.9	7.2	10.3	7.3	5.7	5.4	5.6	4.6
THC0290_0226	274463	275026	-1	CDS	NA	ygfA	THC0290_v2_0236	ygfA	5-formyltetrahydrofolate cyclo-ligase	NA	907	A1602	B535	C143	564	1	1	0	0	THC0290_N_0174	NA	NA	NA	NA	-	8.4	8.4	8.6	8.6	9	9	8.6	9.2	9.2	9.1	8.7	8.7	9.5	9.8	8.9	8.4	10	9.7	9.8	10.7	8.3	8.1	8.2	7.8
THC0290_N_0174	274463	274834	1	Region	3prime				new transcription segment	lspA(CDS:THC0290_0225)	1851	A1726	B546	C143	372	1	0	1	0	THC0290_0226	0	NA	NA	NA	-	8.8	8.7	8.2	8.1	8.7	8.6	9.2	10.3	9.7	9.8	8.1	8	9.4	9.8	9.3	8.9	9.4	8.9	9.7	10.1	9.1	9.3	8.6	8.9
THC0290_N_0175	275027	275071	-1	Region	intra				new transcription segment	ygfA(CDS:THC0290_0226);NA(CDS:THC0290_0227)	-1	NA	NA	NA	45	0	0	0	0	-	0	NA	NA	NA	-	NA	NA	NA	NA	NA	NA	NA	NA	NA	NA	NA	NA	NA	NA	NA	NA	NA	NA	NA	NA	NA	NA	NA	NA
THC0290_0227	275072	276049	-1	CDS	NA		THC0290_v2_0237		Protein of unknown function	NA	3864	A1440	B501	C142	978	0	0	0	0	-	NA	NA	NA	NA	-	9.3	9.3	9.4	9.4	9.3	9.4	9.2	8.3	9.6	9.2	9.6	9.8	9.2	9.6	9.2	9	9.8	9.6	9.6	10.6	9.2	9	9.4	8.9
THC0290_0228	276133	277932	1	CDS	NA	uvrC	THC0290_v2_0238	uvrC	Excinuclease ABC, C subunit	NA	2471	A117	B47	C16	1800	0	0	0	0	-	NA	NA	NA	NA	-	9.5	9.5	9.5	9.4	9.9	10.1	10.1	9.9	10	9.9	9.3	9.4	8.3	8.7	8.8	9	8.1	8.9	9.5	9.4	9.7	9.3	8.9	9
THC0290_0229	277945	280254	1	CDS	NA		THC0290_v2_0239		Probable esterase of the alpha-beta hydrolase superfamily	NA	2470	A117	B47	C16	2310	1	0	0	1	THC0290_flavo-1_0010	NA	NA	NA	NA	-	9.6	9.6	9.8	9.8	10.3	10.5	10.3	9.7	10.9	10.6	9.6	9.6	9.4	9.6	9.5	9.6	9.1	9.4	9.7	10	9.6	9.6	9.7	9.3
THC0290_flavo-1_0010	277967	278046	-1	misc_RNA	NA				Flavo-1 RNA	NA	1354	A1747	B546	C143	80	1	0	1	0	THC0290_0229	NA	NA	NA	NA	-	5.9	6.5	5.9	6.4	6.8	5.4	7.1	4	8.9	7.5	6.1	6.1	7.8	10.4	9.2	8.3	11.5	9	11.1	13	6.6	5.7	6.5	6
THC0290_0230	280355	281833	1	CDS	NA		THC0290_v2_0240		Probable amino acid-transporting permease	NA	3137	A625	B183	C44	1479	0	0	0	0	-	NA	NA	NA	NA	-	12.4	12.6	12.7	12.9	12.4	11.9	11.8	11.8	11.8	11.3	12.7	12.7	11.1	11.6	11.3	11.4	11.2	10.8	10.9	10.6	12.4	12.5	12.7	12.5
THC0290_N_0176	281963	282093	1	Region	5prime				new transcription segment	hmgA(CDS:THC0290_0231)	829	A1552	B523	C143	131	0	0	0	0	-	0	NA	NA	NA	-	10.9	10.9	11.1	11.1	11.4	11.9	11.8	10.7	12	12	11.2	11.1	12.5	15.7	14.2	12.9	13.1	12.5	13.3	15.6	10.9	10.6	11.1	11.1
THC0290_0231	282094	283251	1	CDS	NA	hmgA	THC0290_v2_0241	hmgA	Homogentisate 1,2-dioxygenase	NA	2523	A221	B82	C25	1158	0	0	0	0	-	NA	NA	NA	NA	-	11.9	12.1	12.5	12.5	12.7	13	13.3	10.3	13	12.7	12.4	12.2	12.6	12.1	12.8	12.5	12.5	12.2	12	12.3	12.2	11.5	12.3	12.2
THC0290_N_0177	283252	283453	1	Region	intra				new transcription segment	hppD(CDS:THC0290_0232);hmgA(CDS:THC0290_0231)	2524	A222	B82	C25	202	1	0	0	1	THC0290_flavo-1_0011	0	NA	NA	NA	-	11.4	11.4	11.7	11.5	11.9	12.2	12.4	10.4	12.3	12.2	11.6	11.5	11.8	11.3	12.1	12	11.4	11.4	11.3	10.6	11.6	10.9	11.7	11.7
THC0290_flavo-1_0011	283255	283343	-1	misc_RNA	NA				Flavo-1 RNA	NA	4342	A1163	B398	C121	89	1	1	0	0	THC0290_N_0177	NA	NA	NA	NA	-	3.9	3.9	3.9	4	3.9	4.8	4.3	4.7	3.9	5.3	3.9	4	4	3.9	3.9	3.9	3.9	4.3	3.9	3.9	3.9	4.4	3.9	3.9
THC0290_0232	283454	284614	1	CDS	NA	hppD	THC0290_v2_0242	hppD	4-hydroxyphenylpyruvate dioxygenase	NA	2525	A222	B82	C25	1161	0	0	0	0	-	NA	NA	NA	NA	-	12.3	12.2	12.6	12.5	12.8	13.3	13.1	11.9	12.9	12.9	12.6	12.5	12.4	11.5	12.6	12.7	11.7	12.1	11.5	11.4	12.3	12	12.4	12.4
THC0290_N_0178	284615	284739	1	Region	intra				new transcription segment	NA(Region:THC0290_X_0071);hppD(CDS:THC0290_0232)	4149	A1125	B375	C109	125	0	0	0	0	-	0	NA	NA	NA	-	12.4	12.6	13.1	13.1	13.8	14.3	13.9	15.1	13.6	13.9	12.8	12.7	12.9	11.9	13	13.2	12	12.8	12.7	10.8	12.5	12.7	12.5	12.3
THC0290_N_0179	284741	284837	1	Region	indep	Rfp18			new transcription segment	NA	246	A1769	B546	C143	97	0	0	0	0	-	0	NA	NA	NA	-	10.3	9.7	9.6	9.8	10.2	11.9	11	14.1	11.9	13.5	9.6	9.4	15.3	12.7	12.3	12.1	12	14.4	15.5	12.5	10.2	10.6	10.2	10.6
THC0290_0233	284910	285680	1	CDS	NA		THC0290_v2_0243		Protein of unknown function precursor	NA	404	A1257	B421	C125	771	0	0	0	0	-	NA	NA	NA	NA	-	10.8	11	11.4	11.3	11.2	11.1	10.6	10.8	11.1	11	11.3	11.5	10.9	10.9	10.7	10.8	11.2	11.2	11.4	12.1	10.7	10.8	10.8	10.4
THC0290_0234	285682	286608	1	CDS	NA		THC0290_v2_0244		Tryptophan 2,3-dioxygenase	NA	4280	A674	B189	C46	927	0	0	0	0	-	NA	NA	NA	NA	-	11.7	11.8	12.2	12.1	11.8	11.6	11.2	10.7	10.7	10.5	12.1	12.2	10.4	10.2	10.5	10.4	10.6	10.5	10.8	11.4	11.8	11.8	11.7	11.7
THC0290_0235	286622	287854	1	CDS	NA		THC0290_v2_0245		Probable M23/M37 family peptidase	NA	4264	A1273	B425	C125	1233	0	0	0	0	-	NA	NA	NA	NA	-	10.8	10.7	10.9	10.9	10.6	10.4	10.2	10.1	10.4	10.2	10.9	10.9	10.9	10.8	10.1	10	11.1	11.3	11.1	11.8	10.7	10.9	10.4	10.5
THC0290_0236	287869	288498	1	CDS	NA	pth	THC0290_v2_0246	pth	Aminoacyl-tRNA hydrolase	NA	4265	A1274	B425	C125	630	0	0	0	0	-	NA	NA	NA	NA	-	11	11.1	11.1	11	10.8	10.8	10.3	10.5	10.2	9.9	11.2	11.3	10.2	10.5	10.3	10.3	10.5	10.3	10.2	11.3	11	11.2	10.5	10.4
THC0290_N_0180	288499	288522	1	Region	3prime				new transcription segment	pth(CDS:THC0290_0236)	-1	NA	NA	NA	24	0	0	0	0	-	0	NA	NA	NA	-	NA	NA	NA	NA	NA	NA	NA	NA	NA	NA	NA	NA	NA	NA	NA	NA	NA	NA	NA	NA	NA	NA	NA	NA
THC0290_0237	288547	291963	-1	CDS	NA	fpp1	THC0290_v2_0247	fpp1	Psychrophilic metalloprotease Fpp1 precursor	NA	4191	A1062	B352	C104	3417	0	0	0	0	-	NA	NA	NA	NA	-	7.8	8.2	11.5	11.7	12.1	12.2	13.1	9.2	12.7	12.2	9.8	9.6	9.1	8.1	10.4	10.6	9.6	10.1	10.3	9.9	7.9	6.5	8.4	7.7
THC0290_N_0181	292028	292069	-1	Region	3prime				new transcription segment	fpp2(CDS:THC0290_0238)	4176	A1100	B369	C108	42	0	0	0	0	-	0	NA	NA	NA	-	3.9	3.9	4.9	4.9	5.2	5.8	5.8	4	6.7	7.1	4.1	4.2	3.9	3.9	3.9	4.8	4	3.9	3.9	3.9	3.9	3.9	3.9	3.9
THC0290_0238	292070	294898	-1	CDS	NA	fpp2	THC0290_v2_0248	fpp2	Psychrophilic metalloprotease Fpp2 precursor	NA	4192	A1062	B352	C104	2829	0	0	0	0	-	NA	NA	NA	NA	-	11.4	11.7	13.9	14	13.3	13.6	13.5	10.7	13.6	13.4	13.1	13.1	12.4	11.9	12.9	13	12.2	12.4	12.4	11.9	11.5	10.9	11	11
THC0290_0239	295150	296082	1	CDS	NA	ribF	THC0290_v2_0249	ribF	Bifunctional riboflavin biosynthesis protein RibF : Riboflavin kinase and FMN adenylyltransferase	NA	2234	A1467	B506	C142	933	0	0	0	0	-	NA	NA	NA	NA	-	10.4	10.3	9.8	9.8	9.9	10.2	9.9	10.3	10.3	10.5	10.1	10.1	10.8	10.7	10.4	10.2	10.6	10.6	10.5	10.8	10.2	10.4	9.9	10
THC0290_N_0182	296083	296259	1	Region	intra				new transcription segment	bioB(CDS:THC0290_0240);ribF(CDS:THC0290_0239)	2196	A782	B238	C67	177	0	0	0	0	-	1	296103,296150,+	0.556	48	MIVFNAIMGDLVASC	10.4	10.1	9.8	10	9.8	9.6	9.5	10.3	10.1	10.3	10.1	10.1	10.2	10.4	9.9	10	9.6	9.8	10.1	9.2	10.3	10.5	9.9	9.9
THC0290_0240	296279	297367	1	CDS	NA	bioB	THC0290_v2_0250	bioB	Biotin synthase	NA	3421	A600	B183	C44	1089	0	0	0	0	-	NA	NA	NA	NA	-	12.5	12.4	12.1	12.1	11.2	10.8	10.6	10	11.1	10.9	12.3	12.3	10.4	10.6	10.5	10.6	10.5	10.2	10.3	10.6	12.4	12.7	12.6	12.6
THC0290_N_0183	297368	297412	1	Region	3prime				new transcription segment	bioB(CDS:THC0290_0240)	-1	NA	NA	NA	45	0	0	0	0	-	0	NA	NA	NA	-	NA	NA	NA	NA	NA	NA	NA	NA	NA	NA	NA	NA	NA	NA	NA	NA	NA	NA	NA	NA	NA	NA	NA	NA
THC0290_0241	297417	297623	-1	CDS	NA		NA		Biotin synthase	NA	1994	A1450	B502	C142	207	1	1	0	0	THC0290_N_0184	NA	NA	NA	NA	-	11.6	11.7	12.5	12.5	12.4	12.9	12.6	10.5	13	13.5	12.4	12	14	13.3	13.4	13	13.8	13.8	14	13.6	12.1	11.6	11.9	11.8
THC0290_N_0184	297507	297566	1	Region	indep	Rfp19			new transcription segment	NA	773	A1408	B485	C140	60	1	0	1	0	THC0290_0241	0	NA	NA	NA	-	15	15	14.8	14.8	14.7	14.8	15.3	14.3	15.2	14.7	14.7	14.6	14.8	15.9	15.8	15.2	16.1	15.5	15.4	16.1	15.2	14.8	15.1	15.3
THC0290_tRNA_0005	297803	297876	-1	tRNA	NA				transfer RNA-Met	NA	1638	A1769	B546	C143	74	0	0	0	0	-	NA	NA	NA	NA	-	4.1	4.6	4.8	4.2	5.7	7.8	6.4	9.3	9.6	11.4	4.7	4.5	12.2	11.2	9.6	9.1	11.3	12.8	12.8	10.3	5.2	4.6	5.9	6.4
THC0290_N_0185	297877	297936	-1	Region	5prime				new transcription segment	NA(tRNA:THC0290_tRNA_0005)	1140	A1769	B546	C143	60	0	0	0	0	-	0	NA	NA	NA	-	8.5	8.7	9.7	9.6	10.6	11.3	11.3	12.3	11.7	12.8	9.3	9.4	13.1	12.5	12.3	11.5	12.7	13.1	13.6	12.7	8.9	8.8	9	9.2
THC0290_0242	297963	298367	-1	CDS	NA		THC0290_v2_0252		Probable lyase	NA	1432	A1768	B546	C143	405	0	0	0	0	-	NA	NA	NA	NA	-	9.2	9	10.2	10	10.8	11.5	11.4	11.7	11.5	12.5	10	9.8	13.7	13.1	12.5	11.7	13.4	13.4	13.5	13.9	9.3	9.1	9.2	9.3
THC0290_flavo-1_0012	298410	298481	1	misc_RNA	NA				Flavo-1 RNA	NA	1346	A1747	B546	C143	72	0	0	0	0	-	NA	NA	NA	NA	-	7.7	7.5	7.1	7.8	8	7.4	8.5	7.7	10.2	9.6	7.6	7.4	9.8	11.6	10.2	9.7	12.4	11.2	12.1	13.6	7.6	7.2	7.6	7.6
THC0290_0243	298577	298969	1	CDS	NA	rbfA	THC0290_v2_0253	rbfA	Ribosome-binding factor A	NA	1360	A1768	B546	C143	393	0	0	0	0	-	NA	NA	NA	NA	-	11.2	11	10.8	11	11.7	12.6	11.9	11.9	13	14.1	10.7	10.6	14.7	13.2	12.7	12.5	13.7	15.4	15.6	15.1	10.9	10.9	11.4	11.6
THC0290_0244	298971	300170	1	CDS	NA		THC0290_v2_0254		Probable ABC-type transport system, permease component	NA	1205	A1765	B546	C143	1200	0	0	0	0	-	NA	NA	NA	NA	-	11.1	11.1	10.9	11.1	11.6	11.6	11.9	12.2	12.4	12.4	11	10.9	12.4	12.6	12.3	12	12.8	12.5	13.1	13.6	11.1	11.3	11.5	11.8
THC0290_N_0186	300171	300903	1	Region	3prime				new transcription segment	NA(CDS:THC0290_0244)	1620	A1768	B546	C143	733	1	0	1	0	THC0290_0245	0	NA	NA	NA	-	6.1	5.7	6	6.2	6.7	7.7	7.6	9.4	8.6	9.3	6	5.3	9.6	8.1	8.4	8.1	7.9	9.3	10.7	9.3	6.3	5.8	5.5	6.1
THC0290_0245	300280	301329	-1	CDS	NA	queA	THC0290_v2_0255	queA	S-adenosylmethionine:tRNA-ribosyltransferase- isomerase	NA	1231	A1745	B546	C143	1050	1	1	0	0	THC0290_N_0186	NA	NA	NA	NA	-	12.9	12.8	12.6	12.6	12.8	13.2	13.1	13.2	13.6	13.8	12.5	12.5	14	13.5	13.6	13.4	14.6	14.7	15.8	16.1	13	12.9	13	13.1
THC0290_N_0187	301330	301388	-1	Region	5prime				new transcription segment	queA(CDS:THC0290_0245)	1232	A1745	B546	C143	59	0	0	0	0	-	0	NA	NA	NA	-	12.1	12.2	11.8	11.7	12	12.7	12.3	12.4	12.8	13.8	11.7	11.8	13.8	13.1	13	12.9	14.6	15.2	16.2	16	12.2	12.2	12.3	12.4
THC0290_0246	301503	302732	-1	CDS	NA	aroA	THC0290_v2_0256	aroA	3-phosphoshikimate 1-carboxyvinyltransferase	NA	3282	A601	B183	C44	1230	0	0	0	0	-	NA	NA	NA	NA	-	10.2	10	9.6	9.7	9.2	9.2	9.4	7.7	7.9	7.3	9.7	9.8	6.9	4.1	8.2	7.9	8.1	8.1	5.5	4	10.3	9.7	10.3	10.5
THC0290_0247	302777	303103	-1	CDS	NA		THC0290_v2_0257		MazG family protein	NA	3613	A583	B183	C44	327	0	0	0	0	-	NA	NA	NA	NA	-	10.6	10.6	10.3	10.3	10	10.3	10.1	7.8	8.8	9.2	10.5	10.5	9.2	9.4	9.6	9.3	9.8	9.4	9.9	10.3	10.8	10.5	10.8	11.2
THC0290_N_0188	303104	303302	-1	Region	intra				new transcription segment	NA(CDS:THC0290_0247);NA(CDS:THC0290_0248)	827	A1552	B523	C143	199	0	0	0	0	-	2	303120,303203,-;303243,303296,-	0.959;0.936	84;54	MTKKTEQHTPFVIPTQEESHKEIHIKK;MKQHTVCRSEAGGITQY	9.5	9.4	8.9	9.1	9.2	9.2	9.4	8.7	9	8.9	8.9	8.9	10	14.4	11.2	9.8	11.6	10.4	10.9	13.2	9.4	9.2	9.8	9.5
THC0290_0248	303303	303749	-1	CDS	NA		THC0290_v2_0258		Protein of unknown function	NA	2627	A358	B136	C39	447	0	0	0	0	-	NA	NA	NA	NA	-	9.5	9.3	9.1	9.2	9.2	9.3	9.4	9.3	8.7	8.9	9.2	9.2	9.1	9.3	9.6	9.5	9.3	9.1	8.7	9.8	9.7	9.5	9.4	9.5
THC0290_0249	303781	304143	-1	CDS	NA		NA		Hypothetical protein Putative pseudogene	NA	2628	A359	B136	C39	363	0	0	0	0	-	NA	NA	NA	NA	-	11.3	11.5	11.1	11.2	11.3	11.4	10.9	11.3	10.2	11	11	10.8	11	10.2	10.8	10.5	10.3	10.3	11.5	10.5	11.5	11.4	11.6	11.8
THC0290_N_0189	304144	304193	-1	Region	intra				new transcription segment	NA(CDS:THC0290_0249);NA(CDS:THC0290_0250)	4057	A678	B190	C47	50	0	0	0	0	-	0	NA	NA	NA	-	8.4	8.3	8.6	8.8	9.2	9.8	9.7	11.3	9.6	10.2	8.5	8.7	9	8.1	8.7	8.4	7.9	8.6	9.2	9	8.3	8.4	8.3	8.4
THC0290_0250	304194	304376	-1	CDS	NA		THC0290_v2_0259		Hypothetical protein	NA	2625	A357	B136	C39	183	0	0	0	0	-	NA	NA	NA	NA	-	9.6	9.7	9.3	9.5	9.7	9.3	9.5	10.4	9.4	9.5	9.2	9.3	8.6	9.4	9.3	9.5	9	9.3	9.5	9.6	9.7	9.8	9.9	9.7
THC0290_N_0190	304377	304524	-1	Region	5prime				new transcription segment	NA(CDS:THC0290_0250)	2626	A357	B136	C39	148	0	0	0	0	-	0	NA	NA	NA	-	9.7	9.7	9.3	9.6	10	9.3	9.8	10.9	9.3	9.4	9.3	9.6	8.6	8.9	9.7	9.7	8.8	8.6	10.1	10.6	9.8	9.9	9.9	9.8
THC0290_0251	304650	305642	-1	CDS	NA		THC0290_v2_0261		Protein of unknown function	NA	2632	A372	B141	C39	993	0	0	0	0	-	NA	NA	NA	NA	-	9.6	9.4	9	8.9	9.1	8.6	8.9	9.8	7.6	8.1	9.1	9.2	8.3	8.4	8.2	8.7	8.9	8.6	10	10.1	9.5	9.7	9.5	9.6
THC0290_0252	305655	308825	-1	CDS	NA		THC0290_v2_0262		Probable type II endonuclease-methyltransferase fusion protein	NA	3264	A588	B183	C44	3171	0	0	0	0	-	NA	NA	NA	NA	-	10	9.9	9.5	9.7	9.5	9.4	9.4	9.2	8.1	8.5	9.7	9.6	7.8	7.5	8.6	8.7	8.2	8.3	7	7.7	10	9.9	10	10.2
THC0290_N_0191	308826	308868	-1	Region	intra				new transcription segment	NA(CDS:THC0290_0252);dtd(CDS:THC0290_0253)	-1	NA	NA	NA	43	0	0	0	0	-	0	NA	NA	NA	-	NA	NA	NA	NA	NA	NA	NA	NA	NA	NA	NA	NA	NA	NA	NA	NA	NA	NA	NA	NA	NA	NA	NA	NA
THC0290_0253	308869	309321	-1	CDS	NA	dtd	THC0290_v2_0263	dtd	D-tyrosyl-tRNA(Tyr) deacylase	NA	4437	A714	B202	C53	453	0	0	0	0	-	NA	NA	NA	NA	-	10.8	10.6	10.4	10.3	10.2	10.3	10.4	10.6	9.5	9.7	10.4	10.5	10.4	10.4	10.1	10.1	9.8	9.7	9.3	9.2	10.8	10.5	11	11.1
THC0290_N_0192	309322	309431	-1	Region	intra				new transcription segment	dtd(CDS:THC0290_0253);rsgA(CDS:THC0290_0254)	4459	A721	B205	C53	110	0	0	0	0	-	0	NA	NA	NA	-	10.7	10.8	10.5	10.5	10.7	10.6	11.1	11.6	10.9	11.1	10.5	10.5	11.5	11.4	11.5	11	10.8	10.9	10.8	9.8	11	10.6	11.4	11.6
THC0290_0254	309432	310412	-1	CDS	NA	rsgA	THC0290_v2_0264	rsgA	Putative ribosome biogenesis GTPase RsgA	NA	4461	A721	B205	C53	981	0	0	0	0	-	NA	NA	NA	NA	-	10.5	10.4	10.2	10.1	10.5	10.6	11	11.4	11.1	11.3	10.2	10.3	12	11.9	11.6	11.6	11.1	11.3	11.1	10.8	10.7	10.3	11	11.1
THC0290_N_0193	310413	310478	-1	Region	5prime				new transcription segment	rsgA(CDS:THC0290_0254)	4462	A721	B205	C53	66	0	0	0	0	-	0	NA	NA	NA	-	9.4	9.4	9.1	9.1	9.3	9.7	10	10.5	10.4	11.1	9.1	9.1	11.6	11.4	11	10.7	10.6	10.8	11.3	9.1	9.4	9.3	10	10.2
THC0290_0255	310522	311604	-1	CDS	NA		THC0290_v2_0265		Putative phospho-2-dehydro-3-deoxyheptonate aldolase	NA	4460	A721	B205	C53	1083	0	0	0	0	-	NA	NA	NA	NA	-	10	9.8	9.9	9.7	9.8	10	10.8	9.1	10.9	10.8	9.9	9.9	11.3	11.3	10.9	10.5	10.5	10.3	10.5	10.8	10	9.8	10.6	10.9
THC0290_N_0194	311635	311701	-1	Region	5prime				new transcription segment	NA(CDS:THC0290_0255)	4453	A719	B205	C53	67	0	0	0	0	-	0	NA	NA	NA	-	9	8.7	7.9	7.7	7	7.5	8.5	6.9	5.5	7.4	8.5	8.3	10.9	11.1	9.9	8.9	8.4	8.1	4.1	10.5	9.1	8.6	9.1	9.8
THC0290_0256	311724	312935	-1	CDS	NA	aspC3	THC0290_v2_0266	aspC3	Probable aspartate transaminase AspC3	NA	4454	A719	B205	C53	1212	0	0	0	0	-	NA	NA	NA	NA	-	9.1	8.9	8.1	8.2	7.4	7.2	8.8	8.2	7.7	7.9	8.7	8.5	10.7	11	9.8	8.8	8.7	7.2	8.3	8.4	9.2	9.1	9.5	9.8
THC0290_0257	312932	313768	-1	CDS	NA	pheA	THC0290_v2_0267	pheA	Prephenate dehydratase	NA	4455	A719	B205	C53	837	0	0	0	0	-	NA	NA	NA	NA	-	8.8	8.5	7.9	7.9	7.3	7.6	8.7	8.2	8	8.4	8.5	8.4	11	11.3	10	9.1	7.9	7.8	7.5	5.9	8.6	8.8	8.9	9.2
THC0290_N_0195	313769	313939	-1	Region	5prime				new transcription segment	pheA(CDS:THC0290_0257)	1144	A1769	B546	C143	171	0	0	0	0	-	0	NA	NA	NA	-	7.8	7.7	8.2	8.3	8.3	9	8.3	10.1	9	10.9	8.3	8.3	12.1	11.7	10.1	9.7	11.5	12.4	12.1	11.6	7.6	8.1	7.5	7.5
THC0290_0258	314052	314948	1	CDS	NA	gldA	THC0290_v2_0268	gldA	Gliding motility protein GldA	NA	2712	A78	B36	C15	897	0	0	0	0	-	NA	NA	NA	NA	-	10.4	10.5	10	10.1	10.2	10	10.1	10.3	10.7	10.6	10	10.1	9.7	9.8	9.7	9.9	9.5	9.8	10	10	10.4	10.7	10.2	10
THC0290_0259	314955	315767	1	CDS	NA		THC0290_v2_0269		Probable transcriptional regulator, AraC family	NA	3148	A628	B183	C44	813	0	0	0	0	-	NA	NA	NA	NA	-	9.1	9.2	8.5	8.4	8.3	8.1	8.1	9.3	8.2	7.7	8.5	8.5	6.3	6.5	7.2	7.3	6.2	4.8	4.1	6.4	9.3	9.4	8.4	8.5
THC0290_N_0196	315768	315824	1	Region	intra				new transcription segment	NA(CDS:THC0290_0260);NA(CDS:THC0290_0259)	3000	A292	B108	C30	57	0	0	0	0	-	0	NA	NA	NA	-	8	8	7.4	7.6	7	6.9	6.7	7.6	6.6	6.2	7.3	7.2	5.5	6	4.3	5.7	7.6	6.1	5.3	4.5	8	7.9	7.1	7.3
THC0290_0260	315825	316994	1	CDS	NA		THC0290_v2_0270		Protein of unknown function	NA	1211	A1747	B546	C143	1170	0	0	0	0	-	NA	NA	NA	NA	-	9.1	9.1	8.7	8.8	8.8	8.7	8.9	9	9.7	9.3	8.7	8.6	9.7	10.2	9.7	9.6	10.5	10.5	10.8	11.1	9.1	9.2	8.7	8.7
THC0290_N_0197	316995	317307	1	Region	3prime				new transcription segment	NA(CDS:THC0290_0260)	1213	A1747	B546	C143	313	0	0	0	0	-	0	NA	NA	NA	-	9.5	9.5	9.4	9.4	9.7	9.5	10	9.2	10.7	10.2	9.1	9.3	10.6	11.2	10.1	10	11	10.7	11.6	12.2	9.5	9.8	9	9.1
THC0290_flavo-1_0013	317003	317082	1	misc_RNA	NA				Flavo-1 RNA	NA	1214	A1747	B546	C143	80	0	0	0	0	-	NA	NA	NA	NA	-	7.9	8.1	7.7	7.9	8.2	8	8.6	7.6	9.9	9.4	7.8	7.7	9.8	10.3	9.2	8.9	10.4	10.3	11.3	12.1	8	8	7.6	7.5
THC0290_0261	317564	318664	-1	CDS	NA		THC0290_v2_0271		Homoserine dehydrogenase	NA	4425	A726	B207	C54	1101	0	0	0	0	-	NA	NA	NA	NA	-	6.9	6.7	5.9	5.6	4.9	5.9	5.4	4.6	5.5	5.1	5.9	5.7	7.6	7.1	6.4	6.1	5.7	8.3	8	8.3	7	7.2	7.2	7.4
THC0290_0262	318651	319652	-1	CDS	NA	metX	THC0290_v2_0272	metX	Homoserine O-acetyltransferase	NA	4426	A726	B207	C54	1002	0	0	0	0	-	NA	NA	NA	NA	-	7	6.5	5.7	5.9	5.4	4.6	4.6	4	4.9	4.6	5.7	5.6	4.1	4.9	6.5	4	7.7	6.6	7.8	9.3	7.2	6.8	7	7.6
THC0290_0263	319731	321023	-1	CDS	NA	metY	THC0290_v2_0273	metY	Probable O-acetylhomoserine aminocarboxypropyltransferase	NA	4427	A726	B207	C54	1293	0	0	0	0	-	NA	NA	NA	NA	-	7.2	6.9	6.4	6.2	5.3	5.4	5.7	4.1	4.1	4.1	6.3	5.8	4.9	5	5.8	5.8	8.1	8.3	8.1	9.5	7.4	7.2	7.4	7.9
THC0290_N_0198	321293	321392	-1	Region	indep	Rfp20			new transcription segment	NA	2108	A1435	B498	C142	100	0	0	0	0	-	0	NA	NA	NA	-	5.3	4.9	4.4	4.5	4.1	5.9	4.1	4.3	4.3	6.2	4.5	4.3	6.8	6.5	5.3	5.3	8.7	9	11.3	9.6	5.3	6.4	5	4.9
THC0290_N_0199	321888	322029	-1	Region	indep	Rfp21			new transcription segment	NA	3941	A1554	B525	C143	142	0	0	0	0	-	0	NA	NA	NA	-	8.1	8.2	7.9	7.8	7.7	9.6	8	7.7	9.4	10.7	8.2	7.9	11.2	9.3	9.9	10	9.4	9.9	11.2	8.4	9.5	9.2	8.1	8.3
THC0290_0264	322321	323505	1	CDS	NA		THC0290_v2_0274		Transposase IS91 family	NA	1714	A1756	B546	C143	1185	0	0	0	0	-	NA	NA	NA	NA	-	6.9	7.1	7.6	7.6	7.8	7.8	7.8	8.8	8.2	9.4	7.7	7.8	8.9	9.5	9.1	9	9.3	8.9	9.6	10.6	6.8	6.9	5.9	5.5
THC0290_0265	323507	323950	1	CDS	NA		THC0290_v2_0275		Hypothetical protein	NA	1715	A1756	B546	C143	444	1	1	0	0	THC0290_N_0200	NA	NA	NA	NA	-	6.5	6.8	7.4	7.2	7.6	7.5	7.3	8.8	8.1	8.9	7.4	7.6	8.7	9.2	8.8	8.7	8.9	8.8	9.8	8.8	6.7	6.5	4.9	5.2
THC0290_N_0200	323909	323965	-1	Region	3prime				new transcription segment	NA(CDS:THC0290_0266)	3861	A141	B55	C18	57	1	0	1	0	THC0290_0265	0	NA	NA	NA	-	7.2	7.1	7.2	6.9	6.7	6.6	5.4	8.2	6.6	6.4	7.5	7.2	6	8.1	4.8	6.6	3.9	5.7	4.8	3.9	7.3	7.5	6.5	6.6
THC0290_N_0201	323951	324107	1	Region	3prime				new transcription segment	NA(CDS:THC0290_0265)	168	A1829	B561	C145	157	1	0	1	0	THC0290_0266	0	NA	NA	NA	-	4.1	3.9	3.9	3.9	4.5	4	4.4	7.5	3.9	3.9	4	4	5.2	4	3.9	4.1	4	6	4.1	3.9	3.9	4	3.9	3.9
THC0290_0266	323966	324199	-1	CDS	NA		THC0290_v2_0276		Transcriptional regulator, XRE family	NA	1980	A1463	B506	C142	234	1	1	0	0	THC0290_N_0201	NA	NA	NA	NA	-	8.2	8.2	8	7.9	7.6	8.9	7.1	8.5	8.1	9.1	8.3	8.4	9.8	9.8	7.9	8.2	10.2	10.4	9.7	11.2	8.4	8.7	7.9	7.8
THC0290_0267	324293	325300	1	CDS	NA		THC0290_v2_0277		Hypothetical protein precursor	NA	854	A1486	B509	C142	1008	0	0	0	0	-	NA	NA	NA	NA	-	5.3	5.4	4.9	4.3	4.2	5.1	4.1	6.3	4.4	5.7	5.3	4.9	6.2	7.7	5.7	5	5.5	7.3	8.2	8.5	5.3	5.7	5.9	5.9
THC0290_N_0202	325563	325621	1	Region	5prime				new transcription segment	NA(CDS:THC0290_0268)	1163	A1709	B546	C143	59	0	0	0	0	-	0	NA	NA	NA	-	9.6	9.8	9.6	9.4	9.7	9.7	9.9	11.4	9.9	11.6	9.6	9.9	12.7	11.8	11.3	11.4	11.7	13.3	15	12.3	9.9	10.1	9.3	9.3
THC0290_0268	325622	327997	1	CDS	NA		THC0290_v2_0278		Truncated Eco57I restriction-modification methylase family protein	NA	741	A1576	B530	C143	2376	0	0	0	0	-	NA	NA	NA	NA	-	10.4	10.5	10.4	10.3	10.6	10.7	10.9	12.3	11.1	12.1	10.5	10.7	12.1	12.2	11.8	12.1	11.7	12	11.9	11.7	10.8	11	10.1	9.9
THC0290_N_0203	327998	328041	1	Region	5prime				new transcription segment	NA(CDS:THC0290_0269)	-1	NA	NA	NA	44	0	0	0	0	-	0	NA	NA	NA	-	NA	NA	NA	NA	NA	NA	NA	NA	NA	NA	NA	NA	NA	NA	NA	NA	NA	NA	NA	NA	NA	NA	NA	NA
THC0290_0269	328042	328353	1	CDS	NA		THC0290_v2_0279		Transposase IS3 family, OrfA	NA	1265	A1768	B546	C143	312	0	0	0	0	-	NA	NA	NA	NA	-	10.1	10.3	9.9	10	10.1	10.3	10.4	10.7	11.1	11.1	10.2	10.2	11.4	12	11.2	11.3	11.7	11.8	11.4	12.1	10.2	10.4	10	10.1
THC0290_0270	328404	329249	1	CDS	NA		THC0290_v2_0280		Transposase IS3 family, OrfB	NA	1263	A1768	B546	C143	846	0	0	0	0	-	NA	NA	NA	NA	-	9.8	10	9.8	9.6	9.8	9.7	10.1	10.8	10.6	10.6	9.8	9.8	11.1	11.1	10.9	10.9	11.2	11.1	11.4	11.7	10.1	10.3	9.9	10.1
THC0290_0271	329327	329941	1	CDS	NA		THC0290_v2_0281		Truncated Eco57I restriction-modification methylase family protein	NA	1853	A1731	B546	C143	615	0	0	0	0	-	NA	NA	NA	NA	-	7.9	7.9	7.6	7.3	7.2	7.1	7.2	9.3	7.8	8	7.5	7.6	9	9.1	9	9	8.4	8.7	9	8.8	8.2	8.5	7.9	8.2
THC0290_0272	329944	330672	1	CDS	NA		THC0290_v2_0282		Hypothetical protein	NA	2039	A1396	B479	C139	729	0	0	0	0	-	NA	NA	NA	NA	-	7.3	7	6.2	6.2	6.1	6.1	6.1	7.2	4.4	6.5	6.3	6.2	7.3	7.8	7.9	7.7	6.9	7.7	8.9	9.8	7.2	7.5	7.1	7.5
THC0290_0273	330880	331149	1	CDS	NA		THC0290_v2_0283		Hypothetical protein	NA	1937	A1755	B546	C143	270	0	0	0	0	-	NA	NA	NA	NA	-	5.1	5.2	4.7	4.9	5.8	5.3	5.8	6.4	5.7	6.1	4.9	5.3	5.6	7.1	7.8	7.5	9.4	6.7	9.6	10.5	5.4	5.4	4.7	4.3
THC0290_0274	331155	332150	1	CDS	NA		THC0290_v2_0284		Hypothetical protein	NA	1938	A1755	B546	C143	996	0	0	0	0	-	NA	NA	NA	NA	-	5.8	5.9	5.6	5.6	6.1	5.8	6.4	6.9	5.9	6.5	5.7	5.9	6.6	7.8	7.7	7.9	8.6	7.5	8.9	9.7	6.1	5.8	4.9	5.5
THC0290_N_0204	332704	332735	-1	Region	3prime				new transcription segment	NA(Region:THC0290_N_0205)	-1	NA	NA	NA	32	0	0	0	0	-	0	NA	NA	NA	-	NA	NA	NA	NA	NA	NA	NA	NA	NA	NA	NA	NA	NA	NA	NA	NA	NA	NA	NA	NA	NA	NA	NA	NA
THC0290_tRNA_0006	332736	332812	-1	tRNA	NA				transfer RNA-Asp	NA	953	A1769	B546	C143	77	0	0	0	0	-	NA	NA	NA	NA	-	14.4	14.1	14.5	14.2	14.2	16.6	14.6	16.6	15.3	17	14.8	14.3	16.9	15.8	15.3	14.2	16	17.1	17.1	16.2	14.5	14.8	14.2	14.4
THC0290_N_0205	332826	332898	-1	Region	5prime				new transcription segment	NA(Region:THC0290_N_0204)	818	A1549	B523	C143	73	0	0	0	0	-	0	NA	NA	NA	-	8.4	7.9	8.3	8.1	8.8	10.6	10.7	9	11.1	11.6	8.8	8	10.9	14.3	11.7	10.4	10.2	10.4	11.8	13.5	8.1	8.1	7.7	7.7
THC0290_0275	332899	333825	-1	CDS	NA		THC0290_v2_0285		Protein of unknown function	NA	2139	A1862	B574	C149	927	0	0	0	0	-	NA	NA	NA	NA	-	10.9	10.8	11.3	10.8	11.6	12.4	12.9	10.3	12.3	12.4	11.4	11	12	11.5	11.3	10.9	11.7	12.1	12.6	12.1	11.1	10.5	10.9	10.7
THC0290_flavo-1_0014	333894	333965	1	misc_RNA	NA				Flavo-1 RNA	NA	545	A1285	B432	C126	72	0	0	0	0	-	NA	NA	NA	NA	-	3.9	4.2	3.9	4.1	4.2	4.2	4.1	3.9	3.9	4.1	4	4	7.4	4	4.1	3.9	4.7	5.2	3.9	7.2	4.7	3.9	5	3.9
THC0290_N_0206	334003	334045	-1	Region	3prime				new transcription segment	NA(CDS:THC0290_0276)	-1	NA	NA	NA	43	0	0	0	0	-	0	NA	NA	NA	-	NA	NA	NA	NA	NA	NA	NA	NA	NA	NA	NA	NA	NA	NA	NA	NA	NA	NA	NA	NA	NA	NA	NA	NA
THC0290_0276	334046	334363	-1	CDS	NA		THC0290_v2_0286		Thioredoxin family protein	NA	1113	A1709	B546	C143	318	0	0	0	0	-	NA	NA	NA	NA	-	13	13	13.8	13.4	13.7	14.5	14.2	12.1	14.2	15.1	13.8	13.6	16.1	15.7	15	14.4	16.5	16.5	17.1	17.1	13.3	13.5	13.5	13.6
THC0290_N_0207	334509	334577	-1	Region	3prime				new transcription segment	NA(CDS:THC0290_0277)	3991	A298	B110	C31	69	0	0	0	0	-	0	NA	NA	NA	-	6.6	6.1	5.9	6.1	5.5	6.6	5.9	4.8	6.5	6.7	6.3	6.1	5.5	4.4	4.1	4.2	5.1	7	7.6	4.9	5.5	6.2	7.6	7.9
THC0290_0277	334578	335498	-1	CDS	NA		THC0290_v2_0287		Protein of unknown function precursor, putative outer membrane protein	NA	3534	A605	B183	C44	921	0	0	0	0	-	NA	NA	NA	NA	-	14.3	14.5	14.9	14.7	14.5	14.8	13.8	11.4	13.1	13.3	14.7	14.9	12.5	12	12.5	12.6	12.2	12.3	12.1	12	14.3	14.1	14.9	14.7
THC0290_N_0208	335720	335801	-1	Region	3prime				new transcription segment	NA(CDS:THC0290_0278)	2768	A329	B122	C33	82	0	0	0	0	-	0	NA	NA	NA	-	12.6	12.7	12.6	12.3	11.7	11.5	11.3	9.3	10.6	10.2	12.7	12.6	11.2	13.5	11.6	11	11.4	11	11	12.2	13	12.5	12.6	12.8
THC0290_0278	335802	336416	-1	CDS	NA		THC0290_v2_0288		Probable deoxynucleoside kinase	NA	4019	A22	B12	C5	615	0	0	0	0	-	NA	NA	NA	NA	-	11.3	11.3	10.9	10.9	10.6	10.6	10.1	9.4	10.1	10	11.3	11.2	10.9	10.5	10.6	10.4	10.7	11.3	11	10.6	11.4	11.1	11.2	11.1
THC0290_0279	336416	337207	-1	CDS	NA		THC0290_v2_0289		Hypothetical protein precursor	NA	962	A1671	B543	C143	792	0	0	0	0	-	NA	NA	NA	NA	-	7.3	7.3	7	7.1	7.1	7.2	7.1	8.5	7.9	8	7.2	7.1	8.9	8.8	7.9	7.2	8.9	8.5	9.2	8.2	7.2	7.6	7.8	7.9
THC0290_0280	337415	337477	1	gene	NA		NA		Truncated protein N-terminal region	NA	36	A1144	B387	C115	63	0	0	0	0	-	NA	NA	NA	NA	-	5.2	5.5	5.4	5.3	5.6	5.7	4.5	6.6	5	6.2	5.3	5.4	5.9	3.9	3.9	4.7	5.8	7.7	6	4	5.4	5.8	5.1	5.4
THC0290_0281	337517	337570	1	gene	NA		NA		Truncated protein C-terminal region	NA	1331	A1747	B546	C143	54	0	0	0	0	-	NA	NA	NA	NA	-	8.4	8.3	7.9	8.2	8.3	8.6	8.2	8.3	9.7	9.7	8.1	8.3	9.7	11.6	10.2	9.3	12.3	10.9	11.2	13	8.5	8.4	8.6	8.4
THC0290_0282	337611	338546	1	CDS	NA		THC0290_v2_0290		Probable outer membrane protein precursor	NA	54	A991	B313	C85	936	0	0	0	0	-	NA	NA	NA	NA	-	7.7	7.4	6.8	6.8	6.7	6.9	6.6	7.7	7	7.6	7	7.1	7.1	7.8	6.5	7	4	4	7.7	7.8	7.4	7.7	7.1	7
THC0290_0283	338551	338808	1	gene	NA		THC0290_v2_0291		Fragment of hypothetical protein (part 1)	NA	3401	A595	B183	C44	258	0	0	0	0	-	NA	NA	NA	NA	-	9	8.7	8.4	8.4	8	7.9	7.5	7.8	8.2	8	8.6	8.4	7.4	6.4	7.7	7.9	7.2	7	8	6.2	8.9	8.8	8.5	8.5
THC0290_0284	338926	340089	1	CDS	NA		THC0290_v2_0292		Transposase IS4 family	NA	739	A1663	B542	C143	1164	0	0	0	0	-	NA	NA	NA	NA	-	14.2	14.3	14.6	15.1	15.5	15.5	15.3	15.7	15.9	15.8	14.6	14.5	15.1	15.4	15.5	15.3	15	14.8	14.8	14.2	14	14.2	13.7	13.9
THC0290_0285	340049	340711	1	gene	NA		THC0290_v2_0293		Fragment of hypothetical protein (part 2)	NA	4404	A1269	B424	C125	663	0	0	0	0	-	NA	NA	NA	NA	-	9	8.7	8.1	8.3	7.9	7.9	8.2	7.2	8.2	8.3	8.4	8.2	8.3	8.8	8.7	8.1	8.8	8.6	9.2	10.3	9.2	8.8	8.3	8.7
THC0290_flavo-1_0015	340732	340814	-1	misc_RNA	NA				Flavo-1 RNA	NA	538	A1338	B462	C134	83	0	0	0	0	-	NA	NA	NA	NA	-	3.9	3.9	3.9	3.9	3.9	3.9	3.9	3.9	3.9	3.9	4.1	4	3.9	6.2	3.9	3.9	3.9	4.3	4	4.6	3.9	3.9	3.9	3.9
THC0290_0286	340851	343562	1	CDS	NA		THC0290_v2_0294		Protein of unknown function precursor	NA	2643	A312	B118	C33	2712	0	0	0	0	-	NA	NA	NA	NA	-	6.4	6.2	5.5	5.3	5.1	5.3	5.1	5.2	4.1	4.3	5.6	5.6	5.4	4.4	4.8	5.4	5.9	6.9	4.7	6.4	6.4	6.4	5.8	5.8
THC0290_flavo-1_0016	343562	343644	-1	misc_RNA	NA				Flavo-1 RNA	NA	4048	A1136	B381	C112	83	0	0	0	0	-	NA	NA	NA	NA	-	3.9	3.9	3.9	3.9	3.9	3.9	3.9	4.1	3.9	3.9	3.9	4	3.9	3.9	3.9	3.9	3.9	3.9	3.9	5.2	3.9	3.9	3.9	3.9
THC0290_N_0209	343627	343736	-1	Region	3prime				new transcription segment	metK(CDS:THC0290_0287)	2191	A832	B252	C69	110	0	0	0	0	-	0	NA	NA	NA	-	6.5	6.4	5.8	6.2	5.7	5.7	6.4	5.4	6.1	6.1	5.7	5.4	8.3	8.2	7.2	6.4	7.9	7.7	4	3.9	6.8	6.7	6.8	7.2
THC0290_0287	343737	344987	-1	CDS	NA	metK	THC0290_v2_0295	metK	Methionine adenosyltransferase	NA	3761	A854	B257	C70	1251	0	0	0	0	-	NA	NA	NA	NA	-	13	13	12.4	12.4	11.2	10.9	11.2	9.7	10.5	10.3	12.5	12.1	12.1	12.6	12	11.8	12.3	12	11.3	12.1	13.1	13.3	13.4	13.5
THC0290_N_0210	344988	345117	-1	Region	5prime				new transcription segment	metK(CDS:THC0290_0287)	3762	A855	B257	C70	130	0	0	0	0	-	0	NA	NA	NA	-	12.3	12.1	11.5	11.3	10.2	10.9	10.4	10.3	10	10.4	11.7	11.2	12.9	12.8	11.7	11.5	13.7	14.3	12.8	12.8	12.3	12.7	12.5	12.9
THC0290_miscRNA_0001	345053	345113	-1	misc_RNA	NA				SAM-II long loop	NA	3763	A855	B257	C70	61	0	0	0	0	-	NA	NA	NA	NA	-	12.4	12.2	11.5	11.4	10.3	10.6	10.5	10.2	10	10.3	11.7	11.3	12.6	12.8	11.7	11.5	13.7	14.1	12.8	13.1	12.4	12.6	12.7	12.9
THC0290_0288	345589	346305	-1	CDS	NA	recO	THC0290_v2_0296	recO	DNA repair protein RecO	NA	2993	A576	B183	C44	717	0	0	0	0	-	NA	NA	NA	NA	-	8.5	8.4	8	7.9	7.7	8.1	7.8	7.9	6.9	6.6	8.2	7.9	6.7	5.8	6.5	6	6.5	6.5	7.8	4.9	8.9	8.5	8.2	8.5
THC0290_N_0211	346306	346363	-1	Region	intra				new transcription segment	recO(CDS:THC0290_0288);NA(CDS:THC0290_0289)	2134	A1344	B465	C135	58	0	0	0	0	-	0	NA	NA	NA	-	11	11.1	10.7	11	11.2	11.3	11.1	10.9	11.4	11.1	11.1	11	11	10.8	11	10.8	11.5	11.4	11.6	12.1	11.3	11.2	11.1	11.2
THC0290_0289	346364	348646	-1	CDS	NA		THC0290_v2_0297		Protein of unknown function precursor, putative immunoreactive 84 kDa antigen	NA	2135	A1343	B465	C135	2283	0	0	0	0	-	NA	NA	NA	NA	-	9.6	9.4	9.4	9.3	9.6	9.8	9.6	9.6	9.8	9.9	9.6	9.5	9.9	10.1	9.9	9.7	10	10.5	10.5	9.9	9.7	9.5	9.7	9.6
THC0290_N_0212	348726	348774	-1	Region	3prime				new transcription segment	gdhA(CDS:THC0290_0290)	-1	NA	NA	NA	49	0	0	0	0	-	0	NA	NA	NA	-	NA	NA	NA	NA	NA	NA	NA	NA	NA	NA	NA	NA	NA	NA	NA	NA	NA	NA	NA	NA	NA	NA	NA	NA
THC0290_0290	348775	350118	-1	CDS	NA	gdhA	THC0290_v2_0298	gdhA	Glutamate dehydrogenase (NADP+)	NA	3412	A595	B183	C44	1344	0	0	0	0	-	NA	NA	NA	NA	-	14.4	14.5	14.5	14.5	14.4	14.1	13.8	14.2	13.6	13.4	14.4	14.6	13.1	13.5	13.7	13.6	13	12.9	12.7	12.7	14.4	14.4	14.5	14.4
THC0290_N_0213	350119	350161	-1	Region	5prime				new transcription segment	gdhA(CDS:THC0290_0290)	-1	NA	NA	NA	43	0	0	0	0	-	0	NA	NA	NA	-	NA	NA	NA	NA	NA	NA	NA	NA	NA	NA	NA	NA	NA	NA	NA	NA	NA	NA	NA	NA	NA	NA	NA	NA
THC0290_0291	350310	351137	1	CDS	NA		THC0290_v2_0300		Protein of unknown function precursor	NA	4367	A1772	B546	C143	828	0	0	0	0	-	NA	NA	NA	NA	-	10.5	10.6	11	11.1	11.3	11.2	11.3	9.6	11.9	11.6	11.1	10.8	12	12.4	11.7	11.7	12.1	11.9	11.5	12.5	10.3	10.7	10.6	10.6
THC0290_N_0214	351138	351301	1	Region	3prime				new transcription segment	NA(CDS:THC0290_0291)	303	A1655	B542	C143	164	0	0	0	0	-	0	NA	NA	NA	-	10.8	10.6	11.3	11.5	11.9	12.3	11.8	13	12.8	12.9	11.6	11.1	12.8	12.6	12.2	12.5	11.7	12.1	12	11.1	10.4	11	10.7	10.5
THC0290_N_0215	351298	351316	-1	Region	3prime				new transcription segment	NA(CDS:THC0290_0292)	-1	NA	NA	NA	19	0	0	0	0	-	0	NA	NA	NA	-	NA	NA	NA	NA	NA	NA	NA	NA	NA	NA	NA	NA	NA	NA	NA	NA	NA	NA	NA	NA	NA	NA	NA	NA
THC0290_0292	351317	352102	-1	CDS	NA		THC0290_v2_0301		Protein of unknown function	NA	2335	A377	B143	C41	786	0	0	0	0	-	NA	NA	NA	NA	-	11.4	11.6	11	10.9	11.1	11.1	11.6	8.5	11.3	11.3	11.2	11	10.9	10.8	10.7	10.5	11.6	11.9	11.2	11.1	11.8	11.6	11.3	11.4
THC0290_0293	352207	353211	-1	CDS	NA		THC0290_v2_0302		Protein of unknown function precursor	NA	3932	A59	B31	C14	1005	0	0	0	0	-	NA	NA	NA	NA	-	10.1	10.3	11	10.9	10.6	10.3	10	10.3	9	9.8	10.9	11.2	10.4	10.4	10	10	10.7	10.7	10.4	11.1	9.9	9.8	10.2	9.7
THC0290_0294	353314	355065	1	CDS	NA	aspS	THC0290_v2_0303	aspS	Aspartate--tRNA ligase	NA	3551	A605	B183	C44	1752	0	0	0	0	-	NA	NA	NA	NA	-	12.6	12.6	12	12	11.2	10.8	11.2	8.8	11.7	11.6	12.1	11.9	10.5	10.6	11	11	10.6	10.4	10.3	10.9	12.8	12.4	12.8	12.8
THC0290_0295	355170	355370	1	CDS	NA		THC0290_v2_0304		Probable cold shock protein	NA	3827	A64	B33	C14	201	0	0	0	0	-	NA	NA	NA	NA	-	14.9	14.9	15.5	14.8	14.5	15.7	14.2	14.4	14.4	15.5	15.4	15.4	15.4	13.9	13.8	14.1	14.6	15.5	15.2	14.1	14.8	15.1	15.2	15
THC0290_N_0216	355371	355427	1	Region	3prime				new transcription segment	NA(CDS:THC0290_0295)	958	A1608	B535	C143	57	0	0	0	0	-	0	NA	NA	NA	-	8.9	8.7	8.4	8.5	8.2	9.1	8.5	10.5	9.9	10.7	9.5	9.7	10.4	10.7	9.1	8.9	11.5	11.6	10.4	10.4	8.5	8.8	9.5	9.5
THC0290_N_0217	355417	355516	-1	Region	3prime				new transcription segment	NA(CDS:THC0290_0296)	1733	A1643	B540	C143	100	0	0	0	0	-	0	NA	NA	NA	-	8.4	8.4	8.3	8.8	9.7	9.6	10.2	8.8	11	10.3	8.5	8.2	10.4	11	9.6	9.4	10.3	9.8	9.2	9.3	8	8.4	7.8	7.9
THC0290_0296	355517	355957	-1	CDS	NA		THC0290_v2_0305		Probable cytosine/adenosine deaminase	NA	1430	A1768	B546	C143	441	0	0	0	0	-	NA	NA	NA	NA	-	9.1	9.2	9.7	9.5	10.1	10.9	10.9	9.8	11.4	11.7	9.5	9.6	11.7	11.6	10.8	10.4	11.6	12.3	12.6	12.5	9	9.1	9	8.7
THC0290_0297	356020	356607	1	CDS	NA		THC0290_v2_0306		Protein of unknown function	NA	1910	A1243	B419	C125	588	0	0	0	0	-	NA	NA	NA	NA	-	8.1	8.3	8.7	8.7	8.7	8.8	8.5	9.1	8.9	9	8.7	8.9	10	10	9.4	9.7	10.6	10.5	11.2	11.6	8.2	8.2	8.3	8.2
THC0290_N_0218	356608	356653	1	Region	3prime				new transcription segment	NA(CDS:THC0290_0297)	-1	NA	NA	NA	46	0	0	0	0	-	0	NA	NA	NA	-	NA	NA	NA	NA	NA	NA	NA	NA	NA	NA	NA	NA	NA	NA	NA	NA	NA	NA	NA	NA	NA	NA	NA	NA
THC0290_0298	356654	358429	1	CDS	NA	dxs	THC0290_v2_0307	dxs	1-deoxy-D-xylulose-5-phosphate synthase	NA	1844	A1252	B419	C125	1776	0	0	0	0	-	NA	NA	NA	NA	-	9.2	9.2	9	9.1	9.6	9.1	10	9.5	10.3	10.1	9.1	9.2	10	10.7	10.2	10.1	10.1	10	9.8	10.1	9.2	9.3	9.5	9.4
THC0290_0299	358481	361225	-1	CDS	NA		THC0290_v2_0308		Probable M36 fungalysin family metalloprotease precursor	NA	3335	A605	B183	C44	2745	0	0	0	0	-	NA	NA	NA	NA	-	14	14	14.5	14.4	13.5	13.6	12.8	10.1	11.6	11.4	14.5	14.4	11.3	10.9	11.2	11.4	11.2	11.2	11.3	10.9	14	13.6	13.3	13.2
THC0290_N_0219	361577	361788	1	Region	indep	Rfp22			new transcription segment	NA	1442	A1768	B546	C143	212	1	1	0	0	THC0290_N_0220	0	NA	NA	NA	-	9	9.1	9.2	9	9.6	11.3	10.2	10.9	11.4	12.6	9.3	9.4	12.5	11.5	11.1	11.4	12.6	13.4	13.7	12.5	9.1	9.4	8.6	8.5
THC0290_N_0220	361742	361813	-1	Region	3prime				new transcription segment	NA(CDS:THC0290_0300)	473	A1323	B456	C133	72	1	1	0	0	THC0290_N_0219	0	NA	NA	NA	-	3.9	4.5	4	4	4.1	4.1	3.9	3.9	4.3	4	3.9	4	5.5	7.4	4.1	3.9	5	4.3	7.9	3.9	3.9	3.9	4	4
THC0290_0300	361814	364573	-1	CDS	NA		THC0290_v2_0310		Probable M36 fungalysin family metalloprotease precursor	NA	4190	A1062	B352	C104	2760	0	0	0	0	-	NA	NA	NA	NA	-	10.7	10.6	12.7	12.7	11.9	11.9	11.9	9.4	11.4	11	12	12	10.5	10	11.1	11.1	11.1	11.1	11.4	10.6	10.7	10	11.1	11.1
THC0290_0301	364659	366002	-1	CDS	NA	dgt	THC0290_v2_0311	dgt	Deoxyguanosinetriphosphate triphosphohydrolase (dGTPase)	NA	3638	A593	B183	C44	1344	0	0	0	0	-	NA	NA	NA	NA	-	10	10	10.2	10.3	10.2	9.9	9.9	9.5	9.7	9.4	10.3	10.1	8	7.7	8.8	8.8	8.1	8.5	5.9	8.4	10	9.7	10.1	10.2
THC0290_N_0221	366003	366148	-1	Region	intra				new transcription segment	dgt(CDS:THC0290_0301);NA(CDS:THC0290_0302)	3634	A230	B83	C25	146	0	0	0	0	-	0	NA	NA	NA	-	11.2	11.1	11.4	11.4	11.2	11	11.1	9	10.8	10.6	11.5	11.4	9.8	10.2	10	10	9.4	10	10.4	8.2	11.2	10.8	11.3	11.3
THC0290_0302	366149	367459	-1	CDS	NA		THC0290_v2_0312		Probable penicillin-binding protein precursor	NA	3639	A593	B183	C44	1311	0	0	0	0	-	NA	NA	NA	NA	-	9.8	9.7	10	10	9.8	9.7	9.9	9	9.6	9.5	9.9	10	8.6	8.9	9.2	9.3	8.4	8.6	7.9	9.4	9.8	9.4	10.1	10.1
THC0290_0303	367487	370333	-1	CDS	NA	polA	THC0290_v2_0313	polA	DNA polymerase I	NA	3696	A447	B166	C44	2847	0	0	0	0	-	NA	NA	NA	NA	-	10.2	10.1	10.2	10.2	10	10.3	10.1	9.4	10.1	10.1	10.4	10.4	9.8	10	9.8	9.7	10	9.7	9.4	10.5	10	9.8	10.3	10.6
THC0290_0304	370460	371698	1	CDS	NA		THC0290_v2_0314		Probable transmembrane protein of unknown function	NA	656	A1348	B467	C136	1239	0	0	0	0	-	NA	NA	NA	NA	-	9.5	9.5	8.9	9	8.8	8.4	9	9.4	9	9	8.6	8.7	10	10.3	9.9	9.9	9.9	9.8	10.2	10.5	9.5	10	9.9	10
THC0290_0305	371748	372044	1	CDS	NA		THC0290_v2_0315		Thioredoxin family protein	NA	1990	A1699	B546	C143	297	0	0	0	0	-	NA	NA	NA	NA	-	10.6	10.7	11	10.8	10.8	11.6	10.8	11.1	11.2	11.4	11	11.3	12.9	13	11.4	11.3	13.6	14	13.2	13.5	10.9	11.4	11.3	11.1
THC0290_N_0222	372045	372409	1	Region	3prime				new transcription segment	NA(CDS:THC0290_0305)	119	A1455	B504	C142	365	1	0	1	0	THC0290_0306	0	NA	NA	NA	-	10	9.9	9.1	9.6	9.6	9.5	9.4	10	10.1	9.4	9.4	9.3	10.9	11.6	10.3	9.7	11.2	10.9	10.5	10.9	10.3	10.1	10.3	10
THC0290_0306	372055	372684	-1	CDS	NA		THC0290_v2_0316		Probable polysaccharide deacetylase	NA	4200	A1049	B346	C102	630	1	1	0	0	THC0290_N_0222	NA	NA	NA	NA	-	9.3	9.2	10	9.8	10.2	10.5	10.4	8.6	9.8	9.3	9.7	9.6	9.4	9.2	8.7	8.7	9.4	9.6	9.8	10.1	9.3	9.1	9.1	9.1
THC0290_0307	372841	373998	-1	CDS	NA		THC0290_v2_0317		Probable ABC-type transport system, permease component	NA	2397	A208	B77	C25	1158	0	0	0	0	-	NA	NA	NA	NA	-	9.8	9.6	10.3	10.3	11.2	11.3	11.7	10.9	11.5	10.9	10.1	10	8.2	7.3	9.1	9.6	4.2	8.4	9.4	8.7	9.7	9.5	9.8	9.8
THC0290_0308	373995	374993	-1	CDS	NA		THC0290_v2_0318		Probable ABC-type transport system, membrane fusion efflux lipoprotein precursor component	NA	4177	A1099	B369	C108	999	0	0	0	0	-	NA	NA	NA	NA	-	10.6	10.4	10.9	11	11.8	12.1	12.4	11.7	11.9	12.2	10.9	10.9	10.2	10.6	10.3	10.4	10.2	10.2	10.9	11	10.3	10.1	10.6	10.7
THC0290_0309	375002	376381	-1	CDS	NA		THC0290_v2_0319		Probable outer membrane efflux protein precursor	NA	748	A1760	B546	C143	1380	0	0	0	0	-	NA	NA	NA	NA	-	10.1	10.2	10.5	10.5	11.5	11.8	11.8	12.1	12.3	12.1	10.5	10.5	11.3	11.4	10.9	10.9	11.8	11.1	11.8	12.1	10	9.8	10.6	10.4
THC0290_N_0223	376405	376471	1	Region	indep	Rfp23			new transcription segment	NA	240	A1688	B545	C143	67	0	0	0	0	-	0	NA	NA	NA	-	5.1	5	4.9	6	6	10.4	7.4	11.2	8.8	11.5	4.9	4.8	10	4.3	5.6	6.8	3.9	9.2	11.1	8.4	6.4	5	4.5	4.6
THC0290_N_0224	376486	376524	-1	Region	3prime				new transcription segment	NA(CDS:THC0290_0310)	-1	NA	NA	NA	39	0	0	0	0	-	0	NA	NA	NA	-	NA	NA	NA	NA	NA	NA	NA	NA	NA	NA	NA	NA	NA	NA	NA	NA	NA	NA	NA	NA	NA	NA	NA	NA
THC0290_0310	376525	379755	-1	CDS	NA		THC0290_v2_0320		Probable transmembrane protein of unknown function	NA	4166	A939	B296	C82	3231	0	0	0	0	-	NA	NA	NA	NA	-	11.5	11.5	11.9	12	12.8	12.7	13.1	11.6	13	12.5	11.5	11.4	12.2	11.7	12.4	12.4	11.2	11	11.4	11.4	11.6	11.1	11.7	11.7
THC0290_tRNA_0007	379910	379983	1	tRNA	NA				transfer RNA-Gln	NA	1646	A1769	B546	C143	74	0	0	0	0	-	NA	NA	NA	NA	-	5.6	5.7	5.9	6.1	6.5	9.4	7.4	10.6	10.1	12	6.5	6.3	12.9	10.8	9.7	8.6	11.6	13.4	14.4	12.1	6.5	6.5	6.3	6.6
THC0290_N_0225	379982	380030	-1	Region	3prime				new transcription segment	fbp(CDS:THC0290_0311)	822	A1551	B523	C143	49	1	1	0	0	THC0290_N_0227	0	NA	NA	NA	-	4.1	3.9	4.2	4.6	4.7	3.9	4.2	4.1	5.1	4.8	4.1	4	7.8	10.4	7.7	5.5	8.4	3.9	3.9	7	6	4	3.9	3.9
THC0290_N_0226	379984	380005	1	Region	3prime				new transcription segment	NA(tRNA:THC0290_tRNA_0007)	-1	NA	NA	NA	22	1	1	0	0	THC0290_N_0225	0	NA	NA	NA	-	NA	NA	NA	NA	NA	NA	NA	NA	NA	NA	NA	NA	NA	NA	NA	NA	NA	NA	NA	NA	NA	NA	NA	NA
THC0290_N_0227	380006	380541	1	Region	3prime-PT				new transcription segment	NA	200	A1168	B401	C121	536	2	1	1	0	THC0290_0311;THC0290_N_0225	0	NA	NA	NA	-	6.4	6.3	5.3	5.6	5.4	6.9	6.2	7.9	7.6	7.7	5.3	4.8	7.3	6.5	4.1	5.1	7.5	7.8	7.9	5.3	7	7	6.3	6.9
THC0290_0311	380031	381038	-1	CDS	NA	fbp	THC0290_v2_0321	fbp	Fructose-bisphosphatase	NA	3726	A516	B180	C44	1008	1	1	0	0	THC0290_N_0227	NA	NA	NA	NA	-	11.4	11.7	11.3	11.5	11.3	10.9	11	10.3	11.3	11.1	11.5	11.4	11.2	11.1	10.9	10.9	11.1	10.9	11	11.3	11.5	11.6	12.5	12.2
THC0290_0312	381240	382067	1	CDS	NA	yggG	THC0290_v2_0322	yggG	Putative secreted M48 family metalloprotease YggG precursor	NA	1130	A1762	B546	C143	828	0	0	0	0	-	NA	NA	NA	NA	-	12.7	12.9	13.2	13.4	14	14	14	14.4	14.3	14.5	13	13.3	13.9	14.5	13.9	13.9	15.1	15	14.9	15.3	12.7	12.7	12.4	12.3
THC0290_0313	382030	382551	1	CDS	NA		THC0290_v2_0323		Probable acetyltransferase, GNAT family	NA	619	A1109	B371	C109	522	0	0	0	0	-	NA	NA	NA	NA	-	12.6	12.5	12.9	13	13.6	13.4	13.7	13.7	13.4	13.6	12.6	12.7	13.3	13.5	13.3	13.5	13.3	13.2	13.6	13.8	12.4	12.5	12	11.9
THC0290_N_0228	382552	382823	1	Region	intra				new transcription segment	lysC(CDS:THC0290_0314);NA(CDS:THC0290_0313)	620	A1109	B371	C109	272	0	0	0	0	-	0	NA	NA	NA	-	12.1	12	12.2	12.5	13	12.9	13.2	13.3	12.3	12.5	12.1	12.3	12.7	12.7	12.8	12.7	12.4	12.1	11.9	12.6	11.9	12	11.3	11.4
THC0290_0314	382824	384077	1	CDS	NA	lysC	THC0290_v2_0324	lysC	Aspartate kinase	NA	4164	A1118	B373	C109	1254	0	0	0	0	-	NA	NA	NA	NA	-	11.9	11.9	12.4	12.3	13.1	12.9	13.1	13.1	12.4	12.3	12.1	12.4	12.1	12.1	12.6	12.5	11.8	11.7	11.6	11.4	12	11.9	11.5	11.4
THC0290_N_0229	384078	384122	1	Region	intra				new transcription segment	NA(CDS:THC0290_0315);lysC(CDS:THC0290_0314)	-1	NA	NA	NA	45	0	0	0	0	-	0	NA	NA	NA	-	NA	NA	NA	NA	NA	NA	NA	NA	NA	NA	NA	NA	NA	NA	NA	NA	NA	NA	NA	NA	NA	NA	NA	NA
THC0290_0315	384123	387530	1	CDS	NA		THC0290_v2_0325		Protein of unknown function precursor	NA	2053	A1631	B540	C143	3408	0	0	0	0	-	NA	NA	NA	NA	-	8.7	8.5	8.6	8.5	9	9.1	8.8	9.4	8.9	9.1	8.5	8.5	9.8	9.7	9.6	9.3	9.8	9.6	9.9	10.5	8.5	8.5	8.1	8.3
THC0290_0316	387602	388201	1	CDS	NA		THC0290_v2_0326		Hypothetical protein precursor	NA	4219	A1040	B344	C102	600	0	0	0	0	-	NA	NA	NA	NA	-	12.4	12.8	14.2	14	14.6	15.3	14.4	13.8	11.5	14.2	13.9	14.2	13.5	13.1	13.4	13.3	14	14.1	14.2	14	12.8	12.5	11.8	11.6
THC0290_N_0230	388202	388287	1	Region	intra				new transcription segment	NA(CDS:THC0290_0317);NA(CDS:THC0290_0316)	4220	A1040	B344	C102	86	0	0	0	0	-	0	NA	NA	NA	-	11.7	11.9	13.4	13.1	13.8	15.3	13.5	14.4	11.6	13.8	12.9	13.1	13.2	12.7	12.8	12.6	13.4	13.4	14.1	14.1	11.7	11.5	11	10.7
THC0290_0317	388288	389880	1	CDS	NA		THC0290_v2_0328		Probable glycoside hydrolase, family 13	NA	2556	A250	B89	C27	1593	0	0	0	0	-	NA	NA	NA	NA	-	9.5	9.6	9.9	9.7	10.5	10.3	10.3	10.4	8.6	9.3	9.5	9.6	8.9	8.8	9.1	9.3	8.2	8.6	9.7	8.6	9.6	9.4	9.5	9.4
THC0290_N_0231	389881	389978	1	Region	intra				new transcription segment	NA(CDS:THC0290_0318);NA(CDS:THC0290_0317)	2557	A250	B89	C27	98	0	0	0	0	-	0	NA	NA	NA	-	8.9	8.8	9.2	9	9.6	9.5	9.5	9.8	7.2	8.5	8.9	9	8.1	8.3	8.5	8.1	7.7	8.1	8.8	7.5	8.9	9	8.7	8.7
THC0290_0318	389979	391058	1	CDS	NA		THC0290_v2_0329		Hypothetical protein precursor	NA	2555	A250	B89	C27	1080	0	0	0	0	-	NA	NA	NA	NA	-	9.6	9.4	9.5	9.4	10	9.9	9.9	9.8	7.3	8.7	9.3	9.3	8.4	8.4	8.5	8.5	8.3	8.5	9.1	9.1	9.4	9.4	9.2	9.2
THC0290_N_0232	391059	391227	1	Region	intra				new transcription segment	NA(CDS:THC0290_0319);NA(CDS:THC0290_0318)	570	A1405	B483	C139	169	0	0	0	0	-	0	NA	NA	NA	-	9.4	9.4	9.3	9	9.6	9.6	9.5	9.6	9.4	9.2	9.2	9.2	9.8	9.7	9.3	9.3	9.7	9.8	10	10.9	9.4	9.5	9.1	9.1
THC0290_0319	391228	391704	1	CDS	NA		THC0290_v2_0330		Hypothetical protein	NA	571	A1404	B483	C139	477	0	0	0	0	-	NA	NA	NA	NA	-	8.9	8.9	9	8.6	9.2	9.3	9	9.3	8.6	8.8	8.9	9.1	10.2	10.2	8.9	9	9.9	10.1	9.8	10.7	9.2	9.2	8.5	8.5
THC0290_N_0233	391705	392250	1	Region	repeated_region				new transcription segment	NA	1255	A1768	B546	C143	546	0	0	0	0	-	1	391815,391934,+	0.995	120	MTTSSINIPVFLKINWYKNNLGFSAKFKLGFVLIKFGIN	7.3	7.2	7.3	7.1	7.6	8.3	7.6	8.1	9.1	9.3	7.2	7.4	10.1	10	8.6	8.6	9.6	10.2	10	9.6	7.2	7.6	7	7.1
THC0290_0320	392251	392391	1	gene	NA		THC0290_v2_0332	glpQ	Glycerophosphoryl diester phosphodiesterase (fragment)	NA	1256	A1768	B546	C143	141	0	0	0	0	-	NA	NA	NA	NA	-	8	8.1	7.7	7.8	8.4	8.9	8.5	9.1	9.7	9.9	8	7.9	10.4	10.2	9.1	9.2	9.9	10.6	10.5	10.3	7.9	8.3	8.1	7.8
THC0290_N_0234	392392	392439	1	Region	intra				new transcription segment	NA(CDS:THC0290_0321);NA(gene:THC0290_0320)	-1	NA	NA	NA	48	0	0	0	0	-	0	NA	NA	NA	-	NA	NA	NA	NA	NA	NA	NA	NA	NA	NA	NA	NA	NA	NA	NA	NA	NA	NA	NA	NA	NA	NA	NA	NA
THC0290_0321	392440	393687	1	CDS	NA		THC0290_v2_0333		Protein of unknown function	NA	1363	A1765	B546	C143	1248	1	1	0	0	THC0290_N_0235	NA	NA	NA	NA	-	8.5	8.3	8.3	8.4	9	9.1	9.7	9.2	10.8	10.6	8.4	8.2	10.8	10.9	10.7	10.4	10.2	10.3	9.6	9	8.3	8.2	8.8	9
THC0290_N_0235	393012	393683	-1	Region	3prime				new transcription segment	NA(CDS:THC0290_0322)	186	A127	B53	C18	672	1	0	1	0	THC0290_0321	0	NA	NA	NA	-	7.9	7.7	6.9	7.2	6.5	7	6.6	8.2	6.7	6.5	7.2	6.6	7.3	6.3	5.7	6.1	6.5	6.5	8	4	8	7.9	6.3	6.9
THC0290_0322	393684	394175	-1	CDS	NA		THC0290_v2_0334		Probable transmembrane protein of unknown function	NA	1981	A1464	B506	C142	492	0	0	0	0	-	NA	NA	NA	NA	-	10.3	10.3	10.3	10.4	10.1	10.5	9.6	10.2	10.2	11	10.4	10.4	11.6	11.2	9.8	9.8	11.2	12.3	11.6	10.8	10.3	10.5	9.5	9.6
THC0290_0323	394273	395355	1	CDS	NA	mvaD	THC0290_v2_0335	mvaD	Diphosphomevalonate decarboxylase	NA	708	A944	B298	C82	1083	0	0	0	0	-	NA	NA	NA	NA	-	10.9	10.8	10.6	10.7	11.1	11	11.2	11.9	11.6	11.7	10.7	10.7	11.4	11.1	11.2	11.4	10.9	11.2	11.8	10.8	10.8	10.9	10.9	11
THC0290_0324	395386	395604	1	CDS	NA		THC0290_v2_0336		Hypothetical protein	NA	1153	A1767	B546	C143	219	0	0	0	0	-	NA	NA	NA	NA	-	10.7	10.8	11	11	11.7	11.6	11.8	13	12.5	12.9	10.8	11.2	13	13.4	12.8	12.9	13.3	13.4	13.6	13.8	10.8	10.8	10.8	10.9
THC0290_0325	395604	395825	1	CDS	NA		THC0290_v2_0337		Hypothetical protein	NA	1154	A1767	B546	C143	222	0	0	0	0	-	NA	NA	NA	NA	-	10.8	11	11.2	11.1	11.8	11.7	11.8	12.8	12.6	13	11	11.2	13	13.4	12.8	13	13.2	13.3	13.8	13.9	10.9	11.2	10.9	10.9
THC0290_N_0236	395826	395917	1	Region	intra				new transcription segment	mvaK(CDS:THC0290_0326);NA(CDS:THC0290_0325)	1152	A1767	B546	C143	92	0	0	0	0	-	0	NA	NA	NA	-	13.2	13.2	13.4	13.4	14	14.2	13.9	14.6	14.6	15.2	13.2	13.2	15.7	15.2	14.4	14.6	15.1	15.5	15.6	15.4	13.1	13.5	13.3	13.3
THC0290_0326	395918	396856	1	CDS	NA	mvaK	THC0290_v2_0338	mvaK	Mevalonate kinase	NA	1074	A1669	B542	C143	939	0	0	0	0	-	NA	NA	NA	NA	-	11.1	11.1	11.2	11.3	11.9	11.8	12	12.6	12.4	12.1	11.2	11.3	12.5	12.8	12.6	12.7	12.2	12.2	11.8	12	11	11.1	11.2	11.1
THC0290_N_0237	396857	396898	1	Region	intra				new transcription segment	NA(CDS:THC0290_0327);mvaK(CDS:THC0290_0326)	-1	NA	NA	NA	42	0	0	0	0	-	0	NA	NA	NA	-	NA	NA	NA	NA	NA	NA	NA	NA	NA	NA	NA	NA	NA	NA	NA	NA	NA	NA	NA	NA	NA	NA	NA	NA
THC0290_0327	396899	397816	1	CDS	NA		THC0290_v2_0339		Prenyltransferase family protein	NA	2413	A165	B61	C19	918	1	1	0	0	THC0290_N_0238	NA	NA	NA	NA	-	9.4	9.3	9.1	9.4	9.3	9.5	9.6	10	9.1	8.4	9.2	9	9.5	9.4	9.3	8.8	9.5	8.7	6.5	7.7	9.5	9.3	9.2	9.5
THC0290_N_0238	397725	397782	-1	Region	indep	Rfp24			new transcription segment	NA	-1	NA	NA	NA	58	1	0	1	0	THC0290_0327	0	NA	NA	NA	-	NA	NA	NA	NA	NA	NA	NA	NA	NA	NA	NA	NA	NA	NA	NA	NA	NA	NA	NA	NA	NA	NA	NA	NA
THC0290_N_0239	397817	397941	1	Region	intra				new transcription segment	NA(CDS:THC0290_0328);NA(CDS:THC0290_0327)	558	A1287	B433	C126	125	1	0	0	1	THC0290_flavo-1_0017	0	NA	NA	NA	-	9.4	9.1	9	9	9.2	9.5	9.4	9.7	9.6	9.3	9.1	9.2	9.4	9.4	9	8.7	9.7	8.5	10	11.4	9.4	9	9	9.2
THC0290_flavo-1_0017	397826	397905	-1	misc_RNA	NA				Flavo-1 RNA	NA	154	A1277	B427	C125	80	1	1	0	0	THC0290_N_0239	NA	NA	NA	NA	-	5.1	4.9	4.2	4.6	4.5	4.6	4.9	4.2	6.5	4.9	4.9	4.5	5.2	3.9	6.8	6.4	7.5	3.9	4	8.7	4.8	4.8	5	4.8
THC0290_0328	397957	398865	1	CDS	NA		THC0290_v2_0340		Pseudouridylate synthase	NA	744	A1572	B530	C143	909	0	0	0	0	-	NA	NA	NA	NA	-	12	11.9	11.9	12	12.3	12.4	12.6	12.7	13.2	13.2	11.8	11.8	13	13.1	13	12.8	13.1	13.1	12.4	12.5	12.1	12	12.2	12.4
THC0290_N_0240	398866	398973	1	Region	intra				new transcription segment	NA(CDS:THC0290_0329);NA(CDS:THC0290_0328)	2220	A983	B309	C84	108	0	0	0	0	-	0	NA	NA	NA	-	9.2	9.1	8.4	8.4	8.1	8.5	9	10.6	9.7	10	8.4	8.2	10.4	10.7	10	9.8	9.8	9.9	9.8	7.2	9.3	9.2	9.3	9.9
THC0290_0329	398974	399336	1	CDS	NA		THC0290_v2_0341		Protein of unknown function	NA	2221	A983	B309	C84	363	1	1	0	0	THC0290_N_0241	NA	NA	NA	NA	-	9.5	9.6	9.1	9	9.1	9	9.4	10.4	9.5	9.8	8.7	8.9	10.5	10.9	10.6	10.1	10.9	10.8	9.4	8	9.8	9.8	9.9	10.6
THC0290_N_0241	399232	399754	-1	Region	3prime				new transcription segment	NA(CDS:THC0290_0330)	1253	A1768	B546	C143	523	2	1	1	0	THC0290_0329;THC0290_N_0242	0	NA	NA	NA	-	7.1	6.9	6.7	6.6	7.2	8	7.5	8.6	8.8	9.4	7.1	6.6	10.2	10.3	9.2	9.2	9.9	10.3	10.5	9.4	7	7.7	6.9	6.9
THC0290_N_0242	399337	399396	1	Region	3prime				new transcription segment	NA(CDS:THC0290_0329)	-1	NA	NA	NA	60	1	1	0	0	THC0290_N_0241	0	NA	NA	NA	-	NA	NA	NA	NA	NA	NA	NA	NA	NA	NA	NA	NA	NA	NA	NA	NA	NA	NA	NA	NA	NA	NA	NA	NA
THC0290_0330	399755	400099	-1	CDS	NA		THC0290_v2_0342		Putative transcriptional regulator	NA	1155	A1767	B546	C143	345	0	0	0	0	-	NA	NA	NA	NA	-	8.2	8.6	8.2	8.3	8.6	9	8.7	10	9.8	10.6	8.2	8.4	10.9	11.1	10.1	10	10.8	12	12	11.3	8.4	8.7	8.4	8.7
THC0290_0331	400184	400381	1	CDS	NA		THC0290_v2_0343		Hypothetical protein	NA	1885	A1745	B546	C143	198	0	0	0	0	-	NA	NA	NA	NA	-	6.7	6.7	7	6.4	6.5	6.7	6.6	7	7.4	8.2	6.6	6.6	9.5	9.1	8.4	7.4	9.5	10	10.2	11	6.8	6.9	6.5	6.4
THC0290_N_0243	400566	400739	1	Region	5prime				new transcription segment	NA(CDS:THC0290_0332)	1404	A1763	B546	C143	174	0	0	0	0	-	0	NA	NA	NA	-	8.1	8	8.1	8.3	8.9	9.3	9.5	10.5	11	10.8	8.6	8.6	13.2	13.1	13.2	13.1	13	12.9	13.4	13	8.3	8.7	7.8	7.9
THC0290_0332	400740	408701	1	CDS	NA		THC0290_v2_0344		Protein of unknown function precursor, putative adhesin	NA	626	A1583	B532	C143	7962	0	0	0	0	-	NA	NA	NA	NA	-	14.8	14.8	15.3	15.3	15.5	15.9	15.9	12.4	15.6	15.5	15.7	14.8	17.1	17.1	17.1	17.1	17.1	17.1	16.5	15.7	15	14.7	14.5	14.7
THC0290_0333	408753	409667	1	CDS	NA		THC0290_v2_0345		Protein of unknown function precursor	NA	611	A1102	B370	C109	915	0	0	0	0	-	NA	NA	NA	NA	-	13.2	13.1	13.2	13.4	13.9	13.8	13.9	14	13.8	13.4	13.2	13.3	13.4	13.1	14.2	14.5	13.7	13.7	14	13.6	13	13.1	12.5	12.6
THC0290_0334	409678	411612	1	CDS	NA		THC0290_v2_0346		Probable outer membrane protein precursor, OmpA family	NA	609	A1102	B370	C109	1935	0	0	0	0	-	NA	NA	NA	NA	-	13.1	13.2	13.4	13.5	14	13.8	14	13.8	13.4	13.3	13.5	13.6	13.7	13	14.3	14.4	13.7	13.8	14.2	13.5	13.2	13.3	12.5	12.7
THC0290_N_0244	411613	411646	1	Region	3prime				new transcription segment	NA(CDS:THC0290_0334)	-1	NA	NA	NA	34	1	1	0	0	THC0290_N_0245	0	NA	NA	NA	-	NA	NA	NA	NA	NA	NA	NA	NA	NA	NA	NA	NA	NA	NA	NA	NA	NA	NA	NA	NA	NA	NA	NA	NA
THC0290_N_0245	411627	411655	-1	Region	3prime				new transcription segment	accD(CDS:THC0290_0335)	-1	NA	NA	NA	29	1	1	0	0	THC0290_N_0244	0	NA	NA	NA	-	NA	NA	NA	NA	NA	NA	NA	NA	NA	NA	NA	NA	NA	NA	NA	NA	NA	NA	NA	NA	NA	NA	NA	NA
THC0290_0335	411656	412510	-1	CDS	NA	accD	THC0290_v2_0347	accD	Acetyl-coenzyme A carboxylase carboxyl transferase beta subunit	NA	3636	A593	B183	C44	855	0	0	0	0	-	NA	NA	NA	NA	-	13.2	13.2	13.2	13.3	13.3	13.2	13.4	13	13.2	13.1	13.2	13.1	11.8	11.9	12.2	12.3	11.6	11.6	11.8	11.6	13.2	12.9	13.2	13.1
THC0290_N_0246	412511	412571	-1	Region	intra				new transcription segment	accD(CDS:THC0290_0335);fbaA(CDS:THC0290_0336)	2678	A405	B155	C43	61	0	0	0	0	-	0	NA	NA	NA	-	11.6	11.4	11.6	11.5	11.8	11	11.7	11.6	12.1	11.5	11.6	11.9	10.5	10.9	11.1	11.4	10.3	10.4	10.5	9.2	11.7	11.1	11.5	11.1
THC0290_0336	412572	413639	-1	CDS	NA	fbaA	THC0290_v2_0348	fbaA	Fructose-bisphosphate aldolase	NA	3637	A593	B183	C44	1068	0	0	0	0	-	NA	NA	NA	NA	-	13.2	13	13.1	13.2	13.3	13.3	13.4	12.5	13.4	13.4	13.1	13.2	12.1	12.1	12.2	12.3	11.7	12	12.2	11.9	13	13.1	13	13
THC0290_0337	413681	416212	-1	CDS	NA		THC0290_v2_0349		Probable outer membrane lipoprotein precursor	NA	4236	A1865	B575	C149	2532	0	0	0	0	-	NA	NA	NA	NA	-	9.5	9.6	10	9.9	10.1	10.3	10.3	10.2	10.1	10.6	9.9	9.9	9.3	9.5	9.3	9.5	9.8	9.9	10.1	9.6	9.7	9.9	9.7	9.6
THC0290_N_0247	416229	416973	-1	Region	3prime				new transcription segment	porT(CDS:THC0290_0339)	2440	A130	B53	C18	745	1	0	1	0	THC0290_0338	0	NA	NA	NA	-	7.9	7.5	6.9	7.2	7.2	7.2	7.6	7.6	6.8	6.2	7.6	7	7.1	4.1	6.2	6.4	4	5.1	5.4	3.9	8.2	8	6.9	7.5
THC0290_0338	416249	416977	1	CDS	NA		THC0290_v2_0350		Probable tRNA/rRNA methyltransferase	NA	3945	A902	B280	C77	729	1	1	0	0	THC0290_N_0247	NA	NA	NA	NA	-	9.1	9.2	9	9	9.2	9.4	9.2	9.7	9.9	9.7	8.9	8.9	10.1	9.9	9.2	8.9	9.7	9.6	9.9	10.1	9.1	9.2	9.7	9.6
THC0290_0339	416974	417684	-1	CDS	NA	porT	THC0290_v2_0351	porT	PorT protein	NA	2365	A86	B41	C15	711	0	0	0	0	-	NA	NA	NA	NA	-	10.1	10	9.7	9.9	10.2	10	10.2	10.8	10.5	10.3	9.9	9.8	9.5	9.6	9.6	9.8	9	9.4	9.7	9.4	10.2	10.1	10.1	10.1
THC0290_0340	417706	418437	-1	CDS	NA	ubiE	THC0290_v2_0352	ubiE	Ubiquinone/menaquinone biosynthesis methyltransferase UbiE	NA	3918	A68	B33	C14	732	0	0	0	0	-	NA	NA	NA	NA	-	10.3	10.5	10.4	10.5	10.7	10.7	10.7	12	11.1	11.1	10.5	10.4	10.3	10.6	9.8	9.7	11.3	11.4	10.8	10.6	10.5	10.7	10.6	10.6
THC0290_N_0248	418605	418919	1	Region	indep	Rfp25			new transcription segment	NA	1378	A1760	B546	C143	315	0	0	0	0	-	0	NA	NA	NA	-	8.8	8.9	10.4	10.7	12.2	13.6	13.9	15	15	15.2	10.2	10.3	12.7	12.3	12.4	12.2	13.1	13.6	15.3	14.7	8.6	8.9	8	8.2
THC0290_N_0249	418955	419131	-1	Region	3prime				new transcription segment	dfrA(CDS:THC0290_0341)	3160	A557	B183	C44	177	0	0	0	0	-	0	NA	NA	NA	-	9.1	9.1	8.8	8.8	8.5	8.2	7.4	7.3	6.1	6.2	9	8.8	5.7	7.1	5.7	5.7	3.9	7.4	4	7	9.3	9.1	9.2	8.9
THC0290_0341	419132	419620	-1	CDS	NA	dfrA	THC0290_v2_0353	dfrA	Dihydrofolate reductase	NA	3019	A566	B183	C44	489	0	0	0	0	-	NA	NA	NA	NA	-	9.4	9.4	9.4	9.5	9.4	9.1	8.5	8.2	7.7	8.2	9.6	9.4	8	4.3	6.2	6.7	5.4	8.1	7.2	4.1	9.4	9.5	9.5	9.4
THC0290_0342	419620	419949	-1	CDS	NA		THC0290_v2_0354		Probable transmembrane protein	NA	3915	A66	B33	C14	330	0	0	0	0	-	NA	NA	NA	NA	-	9.8	9.9	10	10	9.8	9.8	9.1	9.8	9.1	9.2	10	10.3	9.3	9.3	8.1	8.5	8.9	9.2	10.1	10.2	9.8	9.9	10	10
THC0290_0343	420014	422260	-1	gene	NA		THC0290_v2_0355		Protein of unknown function precursor (fragment)	NA	2635	A373	B141	C39	2247	0	0	0	0	-	NA	NA	NA	NA	-	7.9	7.8	7	7.1	6.8	6.8	6.6	6.6	6.6	6.4	7.2	6.9	5.1	6.7	5.7	5.3	7.8	7.4	5.6	9.4	8.3	7.8	7.9	8
THC0290_0344	422318	423142	-1	CDS	NA	thyA	THC0290_v2_0356	thyA	Thymidylate synthase	NA	3554	A605	B183	C44	825	0	0	0	0	-	NA	NA	NA	NA	-	11.6	11.5	11.1	11	10.8	10.8	11.1	8.1	11.1	10.9	11.3	10.8	9.4	8.6	9.6	9.3	9.5	9.5	9.2	8.6	11.9	11.2	11.4	11.4
THC0290_N_0250	423143	423212	-1	Region	intra				new transcription segment	thyA(CDS:THC0290_0344);NA(CDS:THC0290_0345)	3548	A605	B183	C44	70	0	0	0	0	-	0	NA	NA	NA	-	11.5	11.3	10.8	10.7	10.4	10.5	11	9.2	11.2	11.2	11.1	10.6	9.2	8.9	9.4	9.3	9.1	9.3	8.5	9.5	11.7	10.9	11.2	11.2
THC0290_0345	423213	423833	-1	CDS	NA		THC0290_v2_0357		Protein of unknown function	NA	3555	A605	B183	C44	621	0	0	0	0	-	NA	NA	NA	NA	-	12.5	12.6	12.5	12.2	11.8	12.2	12.2	8.5	11.5	11.6	12.6	12.1	10.6	10.3	10.7	10.6	10.9	10.8	10.8	10.3	13	12.4	12.5	12.6
THC0290_N_0251	423834	424019	-1	Region	5prime				new transcription segment	NA(CDS:THC0290_0345)	2706	A916	B284	C77	186	1	0	0	1	THC0290_flavo-1_0018	0	NA	NA	NA	-	9.8	9.6	9.1	9	8.8	9.3	9.2	7.9	9.5	10.2	9.2	8.9	9.1	8.7	8.5	8.3	9.4	10.1	9.6	6.4	9.9	9.5	9.4	9.7
THC0290_flavo-1_0018	423935	424021	1	misc_RNA	NA				Flavo-1 RNA	NA	515	A1166	B400	C121	87	1	1	0	0	THC0290_N_0251	NA	NA	NA	NA	-	4.1	3.9	4	4.1	4	4.1	4	4.5	4	3.9	3.9	4	4	4.1	4.1	3.9	5.1	4.6	7.1	3.9	4	4	3.9	4
THC0290_N_0252	424075	424125	-1	Region	3prime				new transcription segment	etfA(CDS:THC0290_0346)	4393	A689	B194	C49	51	0	0	0	0	-	0	NA	NA	NA	-	6.8	7	7.2	7.1	6.8	7.2	7.7	5.7	8.8	8.4	7.3	6.7	8.5	8.7	8	7.3	8	8.1	3.9	7.4	7.7	6.8	8	7.9
THC0290_0346	424126	425094	-1	CDS	NA	etfA	THC0290_v2_0358	etfA	Electron transfer flavoprotein, alpha subunit	NA	2593	A697	B197	C51	969	0	0	0	0	-	NA	NA	NA	NA	-	13	13	13.1	13.1	12.6	12.8	12.8	11.1	12	12.1	13.4	13.4	11.6	11.6	11.9	11.7	11.8	11.6	11.3	11.9	13.1	12.6	12.9	13.1
THC0290_N_0253	425095	425243	-1	Region	intra				new transcription segment	etfA(CDS:THC0290_0346);etfB(CDS:THC0290_0347)	2594	A697	B197	C51	149	0	0	0	0	-	0	NA	NA	NA	-	11.8	11.7	11.8	11.7	11.3	11.4	11.4	9.9	10.9	10.8	12.1	12.1	10.4	11.3	10.9	10.8	10.4	10.5	10.2	10.6	11.8	11.3	11.8	11.7
THC0290_0347	425244	425990	-1	CDS	NA	etfB	THC0290_v2_0359	etfB	Electron transfer flavoprotein, beta subunit	NA	2592	A697	B197	C51	747	0	0	0	0	-	NA	NA	NA	NA	-	12.4	12.3	12.4	12.4	12.1	12.5	12.2	10.9	11.8	12	12.7	12.6	11.8	12.5	11.7	11.6	12.3	12.4	11.7	11.9	12.3	12	12.4	12.3
THC0290_0348	426192	427169	1	CDS	NA	pdhB	THC0290_v2_0360	pdhB	Pyruvate dehydrogenase E1 component, beta subunit	NA	3435	A595	B183	C44	978	0	0	0	0	-	NA	NA	NA	NA	-	13.3	13.3	13	13.1	13	12.7	12.8	12.3	12.7	12.7	13	13	11.6	11.6	11.7	11.8	11.6	11.6	11.5	11.4	13.1	13.2	13.5	13.4
THC0290_N_0254	427170	427297	1	Region	intra				new transcription segment	NA(CDS:THC0290_0349);pdhB(CDS:THC0290_0348)	826	A1552	B523	C143	128	0	0	0	0	-	0	NA	NA	NA	-	11.2	11.2	11	11.2	11.1	10.5	11.2	11.2	10.9	10.7	11.1	11.1	12.1	13.5	13.2	11.8	12.3	10.8	12.9	14.4	11.3	11	11.5	11.4
THC0290_0349	427298	429790	1	CDS	NA		THC0290_v2_0361		Probable outer membrane protein precursor	NA	3473	A600	B183	C44	2493	0	0	0	0	-	NA	NA	NA	NA	-	11.9	11.9	11.7	11.7	11.7	11.4	11.4	11.3	11	11.2	11.7	11.8	10.1	9.9	10.4	10.4	9.7	10	10.3	10	11.9	12	11.8	11.8
THC0290_N_0255	429791	430052	1	Region	intra				new transcription segment	ppa(CDS:THC0290_0350);NA(CDS:THC0290_0349)	2622	A356	B135	C39	262	0	0	0	0	-	0	NA	NA	NA	-	11	11.1	10.8	10.7	10.8	10.4	10.7	11.3	10.7	11	10.8	11	9.7	10.1	10.7	10.2	10.5	10	10.2	11.7	11.1	11.2	10.9	10.9
THC0290_0350	430070	430600	1	CDS	NA	ppa	THC0290_v2_0362	ppa	Inorganic diphosphatase	NA	3469	A600	B183	C44	531	0	0	0	0	-	NA	NA	NA	NA	-	13.6	13.7	13.2	13	12.4	12.4	11.8	12.5	11.8	12.1	13.2	13.1	11.1	10.7	11.1	11.4	10.9	11.2	11.2	10.6	13.7	14	13.8	13.8
THC0290_N_0256	430601	430653	1	Region	3prime				new transcription segment	ppa(CDS:THC0290_0350)	-1	NA	NA	NA	53	0	0	0	0	-	0	NA	NA	NA	-	NA	NA	NA	NA	NA	NA	NA	NA	NA	NA	NA	NA	NA	NA	NA	NA	NA	NA	NA	NA	NA	NA	NA	NA
THC0290_N_0257	430687	430866	1	Region	indep	Rfp26			new transcription segment	NA	1056	A1686	B545	C143	180	1	0	1	0	THC0290_0351	0	NA	NA	NA	-	6	6	5.9	6.1	6.3	7.1	6.6	9.2	7.3	8.4	5.9	5.5	8.8	9.1	5.8	5.3	6.7	9.1	9.3	7.2	6.3	6.8	6.8	6.4
THC0290_0351	430697	431740	-1	CDS	NA		THC0290_v2_0363		Putative carboxypeptidase	NA	4078	A1080	B363	C107	1044	1	1	0	0	THC0290_N_0257	NA	NA	NA	NA	-	10.5	10.5	10.3	10.5	10.7	10.6	10.7	10	10.7	10.6	10.8	10.8	10.3	10.1	10	10.1	10.6	10.3	10.3	10.9	10.5	10.5	9.7	9.9
THC0290_0352	431831	436357	-1	CDS	NA	dnaE/dnaQ	THC0290_v2_0364	dnaE/dnaQ	Probable DNA polymerase III, alpha and epsilon subunits	NA	2876	A466	B169	C44	4527	0	0	0	0	-	NA	NA	NA	NA	-	10.5	10.5	10.2	10.2	10.6	10.5	10.9	9.6	10.8	10.8	10.5	10.4	9.9	9.7	10.2	10.2	9.4	9.9	9.4	8.5	10.5	10.2	10.3	10.3
THC0290_N_0258	436358	436423	-1	Region	5prime				new transcription segment	dnaE/dnaQ(CDS:THC0290_0352)	510	A1555	B525	C143	66	0	0	0	0	-	0	NA	NA	NA	-	10.1	9.8	9.6	9.5	9.9	11.4	10.5	9.8	10.6	11.5	10	9.9	11.8	11	10.2	10	10.8	11.8	12.3	11.3	10	10.1	10	10.4
THC0290_0353	436626	437957	-1	gene	NA		THC0290_v2_0365		Divergent AAA domain protein	NA	98	A1203	B413	C124	1332	0	0	0	0	-	NA	NA	NA	NA	-	9	8.9	7.8	7.9	8.4	8.5	8.8	9.6	9.3	9.2	8.2	8.2	9.4	10.2	9.2	9.3	9.6	9.1	8.7	9	8.9	9.1	8.5	9
THC0290_N_0259	437958	438171	-1	Region	5prime				new transcription segment	NA(gene:THC0290_0353)	1260	A1768	B546	C143	214	0	0	0	0	-	1	438006,438071,-	0.841	66	METWKEKALIILRDSLFPVPI	10.4	10.4	10	9.9	10.7	11	10.8	11.7	11.4	12.2	10.2	10.3	12.4	12.2	11.3	11.2	12.4	13.1	13.7	12.7	10.4	10.7	10.3	10.4
THC0290_0354	438303	438704	-1	CDS	NA	rpbA	THC0290_v2_0366	rpbA	Putative RNA-binding protein RbpA	NA	813	A971	B307	C84	402	0	0	0	0	-	NA	NA	NA	NA	-	13.4	13.3	13.2	13.2	13	13.4	13.3	13.8	14.1	14	13.2	13	15.2	15.3	14.1	13.8	15.8	15.7	15.7	15.8	13.3	13.8	14.1	14.5
THC0290_N_0260	438724	438989	-1	Region	intra				new transcription segment	rpbA(CDS:THC0290_0354);NA(CDS:THC0290_0355)	3512	A602	B183	C44	266	0	0	0	0	-	0	NA	NA	NA	-	10.2	10.3	10.6	10.7	10.1	9.9	9.9	8.9	9.3	9.5	10.8	10.6	9.7	9.5	9.6	9.5	9.5	9.6	9.2	7.8	10.2	10.3	10.6	10.5
THC0290_0355	438990	439676	-1	CDS	NA		THC0290_v2_0367		Probable lipoprotein precursor	NA	3731	A518	B180	C44	687	0	0	0	0	-	NA	NA	NA	NA	-	10.9	11.2	11.6	11.5	10.9	10.8	10.7	9.1	10.5	10.4	11.6	11.6	10.7	10.9	10.3	10.3	10.9	10.8	10.6	11	11	10.8	11.5	11.4
THC0290_N_0261	439822	439863	1	Region	5prime				new transcription segment	rpsP(CDS:THC0290_0356)	-1	NA	NA	NA	42	0	0	0	0	-	0	NA	NA	NA	-	NA	NA	NA	NA	NA	NA	NA	NA	NA	NA	NA	NA	NA	NA	NA	NA	NA	NA	NA	NA	NA	NA	NA	NA
THC0290_0356	439864	440406	1	CDS	NA	rpsP	THC0290_v2_0368	rpsP	30S ribosomal protein S16	NA	3643	A562	B183	C44	543	0	0	0	0	-	NA	NA	NA	NA	-	14.9	14.9	15.1	14.7	14.4	14.4	14.2	14.6	14.6	14.7	14.9	14.9	13.5	13	13.7	13.8	13.2	13.3	13.9	13.2	14.9	15	14.9	15
THC0290_0357	440423	440947	1	CDS	NA	rimM	THC0290_v2_0369	rimM	16S rRNA processing protein RimM	NA	3491	A600	B183	C44	525	0	0	0	0	-	NA	NA	NA	NA	-	12.4	12.6	11.7	11.9	10.8	10.6	10.3	10.8	10.8	10.7	11.7	11.5	9.1	9	9.7	9.9	8.9	9.6	10.1	10	12.6	12.7	12.2	12.5
THC0290_N_0262	440948	441076	1	Region	intra				new transcription segment	yfiC(CDS:THC0290_0358);rimM(CDS:THC0290_0357)	3492	A600	B183	C44	129	0	0	0	0	-	0	NA	NA	NA	-	11.8	11.8	10.9	10.7	9.9	9.6	9.8	10	9.9	9.8	10.8	10.7	8.3	7.8	8.6	9.1	9.2	9	9.5	10.4	11.8	12.1	11.5	11.6
THC0290_0358	441077	441781	1	CDS	NA	yfiC	THC0290_v2_0370	yfiC	Protein of unknown function YfiC	NA	3488	A600	B183	C44	705	1	1	0	0	THC0290_N_0263	NA	NA	NA	NA	-	10.8	10.6	9.5	9.5	8.3	8.3	7.8	7.8	8.4	8.3	9.6	9.4	7	6.5	7.5	7.6	4	7.5	8	7.1	10.8	10.7	10.2	10.6
THC0290_N_0263	441466	441936	-1	Region	3prime-PT				new transcription segment	NA	1375	A1760	B546	C143	471	1	0	1	0	THC0290_0358	0	NA	NA	NA	-	7.4	7.5	7.6	7.7	9.3	9.8	10.3	10.8	10.7	10.5	7.6	7.2	9.9	10.1	9.3	9	10.1	10.3	10.9	9.1	7.6	7.5	7.6	7.2
THC0290_N_0264	441896	442163	1	Region	indep	Rfp27			new transcription segment	NA	1035	A1653	B542	C143	268	3	2	1	0	THC0290_0359;THC0290_N_0263;THC0290_N_0265	0	NA	NA	NA	-	5	4.6	4.9	5.2	5.7	7.4	6.2	8.7	6.6	9.1	4.8	4.5	9.3	6.7	6.8	5.7	6.5	9.5	9.5	4	5.4	5.2	4.5	4.6
THC0290_N_0265	441937	441969	-1	Region	3prime				new transcription segment	gcdH(CDS:THC0290_0359)	-1	NA	NA	NA	33	1	1	0	0	THC0290_N_0264	0	NA	NA	NA	-	NA	NA	NA	NA	NA	NA	NA	NA	NA	NA	NA	NA	NA	NA	NA	NA	NA	NA	NA	NA	NA	NA	NA	NA
THC0290_0359	441970	443148	-1	CDS	NA	gcdH	THC0290_v2_0371	gcdH	Glutaryl-CoA dehydrogenase	NA	4168	A1	B1	C1	1179	1	1	0	0	THC0290_N_0264	NA	NA	NA	NA	-	13.2	13.2	13.1	13.3	13.4	13.2	13.5	12	13.8	13.5	13.1	13.1	13	13.1	13.2	13.2	13.1	13	12.8	12.9	13.1	13	13.3	13.3
THC0290_N_0266	443181	443281	-1	Region	intra				new transcription segment	gcdH(CDS:THC0290_0359);gmk(CDS:THC0290_0360)	3202	A596	B183	C44	101	0	0	0	0	-	0	NA	NA	NA	-	10.9	10.8	10.3	10.4	9.8	10	9.7	8.4	9.2	9.6	10.6	10.4	9.6	8.8	9.8	10	8.5	9.8	9.4	5.8	11	10.7	11.2	11.4
THC0290_0360	443282	443857	-1	CDS	NA	gmk	THC0290_v2_0372	gmk	Guanylate kinase	NA	3203	A596	B183	C44	576	0	0	0	0	-	NA	NA	NA	NA	-	11	10.9	10.4	10.3	9.8	9.9	9.9	8.9	9.2	9.5	10.6	10.6	9.3	9.1	9.9	9.9	9.4	9.5	8.9	7.6	10.9	10.7	11.2	11.5
THC0290_0361	443880	444377	-1	CDS	NA		THC0290_v2_0373		Protein of unknown function	NA	3562	A596	B183	C44	498	0	0	0	0	-	NA	NA	NA	NA	-	11.2	11.1	10.7	10.6	10.4	10.3	10.2	10.3	9.2	9.8	10.8	11	9.8	9.6	10.1	10.2	10	10	9.8	9.3	11.2	10.8	11.3	11.6
THC0290_0362	444402	445262	-1	CDS	NA		THC0290_v2_0374		Protein of unknown function	NA	3123	A596	B183	C44	861	0	0	0	0	-	NA	NA	NA	NA	-	11.7	11.7	11.4	11.3	11.1	11.3	11.2	11.1	11	11.3	11.5	11.5	10.7	10.6	11	11	10.7	10.8	10.7	9.8	11.7	11.4	11.9	12.2
THC0290_0363	445561	446439	-1	CDS	NA		THC0290_v2_0375		Probable drug/metabolite-transporting permease	NA	2985	A549	B181	C44	879	0	0	0	0	-	NA	NA	NA	NA	-	8.8	8.5	7.8	7.9	7.9	7.8	7.8	8.7	7.5	7.5	8	7.9	7.2	7.3	7.4	7.2	6.5	7.2	7.5	6.8	8.8	8.7	9.3	9.6
THC0290_0364	446432	446788	-1	CDS	NA		THC0290_v2_0376		Probable arsenate reductase (glutaredoxin)	NA	3999	A986	B311	C84	357	0	0	0	0	-	NA	NA	NA	NA	-	9.7	9.6	9.3	9.2	9.6	9.8	9.8	9.4	10.1	10.4	9.3	9.3	9.6	9.2	9.4	9.4	9.4	9.5	10.2	10.6	9.7	9.8	10.5	10.4
THC0290_N_0267	446871	447017	1	Region	5prime				new transcription segment	NA(CDS:THC0290_0365)	1128	A1762	B546	C143	147	0	0	0	0	-	0	NA	NA	NA	-	9.7	9.3	10.5	10.1	10.8	11.8	11.4	12.3	11.8	12.2	11	10.8	12.4	12.2	11.4	11.5	12.7	13	13.5	13.5	9.2	9.8	9.4	8.7
THC0290_0365	447018	447473	1	CDS	NA		THC0290_v2_0378		Protein of unknown function	NA	1776	A1762	B546	C143	456	0	0	0	0	-	NA	NA	NA	NA	-	9.6	9.7	10.4	10.4	11	10.8	10.8	11.1	11	10.9	10.5	10.7	11.1	11.1	11	11	11.4	11.4	11	11.5	9.6	9.7	9.8	9.3
THC0290_N_0268	447474	447645	1	Region	intra				new transcription segment	NA(CDS:THC0290_0366);NA(CDS:THC0290_0365)	1777	A1762	B546	C143	172	1	0	0	1	THC0290_flavo-1_0019	0	NA	NA	NA	-	10.1	10.1	10.7	10.8	11.3	11.3	11.6	10.9	12	11.7	10.7	10.9	11.7	11.6	11.8	11.6	11.9	12.1	11.7	11.8	10	9.9	10	9.8
THC0290_flavo-1_0019	447475	447550	-1	misc_RNA	NA				Flavo-1 RNA	NA	823	A1730	B546	C143	76	1	1	0	0	THC0290_N_0268	NA	NA	NA	NA	-	3.9	4.2	4	4.2	4.5	4.1	4.1	6.7	4.3	4.1	4	4	9.1	10.3	7.3	4.1	7.4	7.8	8.7	9.9	4.9	4	4.3	3.9
THC0290_0366	447661	448809	1	CDS	NA		THC0290_v2_0379		Cys/Met metabolism PLP-dependent enzyme	NA	672	A1776	B546	C143	1149	1	1	0	0	THC0290_N_0269	NA	NA	NA	NA	-	12.4	12.4	12.5	12.7	13	12.8	13.3	12.8	13.4	13	12.4	12.4	13	13.4	13.4	13.2	12.8	12.5	12.9	12.7	12.3	12.3	12.7	12.5
THC0290_N_0269	448689	448837	-1	Region	3prime-PT				new transcription segment	NA	1818	A1795	B549	C143	149	2	1	1	0	THC0290_0366;THC0290_N_0270	0	NA	NA	NA	-	5.4	5.4	6.1	6.3	7.4	8	8.9	10	10.7	11	6.3	5.3	13.1	13.1	12	11.2	13.6	13.7	13	13.4	5.9	5.7	5.3	5
THC0290_N_0270	448810	448861	1	Region	3prime				new transcription segment	NA(CDS:THC0290_0366)	673	A1363	B469	C136	52	1	1	0	0	THC0290_N_0269	0	NA	NA	NA	-	10.4	10.4	10	10.4	10.6	10.5	10.9	11.2	11.9	11.5	10.1	9.8	11.7	11.7	11.5	11.3	11	11.1	10.9	10	10.2	10.4	10.5	10.7
THC0290_N_0271	448838	448909	-1	Region	3prime				new transcription segment	NA(CDS:THC0290_0367)	1819	A1795	B549	C143	72	1	1	0	0	THC0290_N_0272	0	NA	NA	NA	-	5.2	6.4	7.6	7.6	9.4	9	10.4	11.1	12.7	12.1	6.8	7.6	13.7	13.8	13.8	13.1	15.4	14.7	15	15.4	6	6	5.9	5.6
THC0290_N_0272	448862	449419	1	Region	3prime-PT				new transcription segment	NA	651	A1351	B467	C136	558	3	2	1	0	THC0290_0367;THC0290_N_0271;THC0290_N_0273	0	NA	NA	NA	-	9.5	9.3	8.7	9.1	8.7	8.5	9	10	8.4	8.9	9	8.7	10.5	9.8	9.1	7.7	9.8	10.9	11.2	10.5	9.4	9.5	9.6	9.9
THC0290_0367	448910	449260	-1	CDS	NA		THC0290_v2_0380		Protein of unknown function precursor	NA	1820	A1795	B549	C143	351	1	1	0	0	THC0290_N_0272	NA	NA	NA	NA	-	8.4	8.7	10.1	10.5	11.7	11.7	12.3	12.5	14.7	14.6	10	10.1	15.4	15.5	14.9	14.8	15.9	15.7	16	16	8.4	8.6	8.5	8
THC0290_N_0273	449261	449300	-1	Region	5prime				new transcription segment	NA(CDS:THC0290_0367)	-1	NA	NA	NA	40	1	1	0	0	THC0290_N_0272	0	NA	NA	NA	-	NA	NA	NA	NA	NA	NA	NA	NA	NA	NA	NA	NA	NA	NA	NA	NA	NA	NA	NA	NA	NA	NA	NA	NA
THC0290_0368	449469	450680	-1	CDS	NA		THC0290_v2_0382		Probable lipoprotein precursor	NA	1077	A1670	B542	C143	1212	0	0	0	0	-	NA	NA	NA	NA	-	7.7	7.9	8.1	8.5	8.9	9.3	10.7	9.4	11	10.3	7.2	7.3	12	12.7	11.7	11.3	11.2	10.8	8.1	7.9	7.6	7.4	7.1	6.9
THC0290_0369	450870	453704	-1	CDS	NA		THC0290_v2_0383		Probable TonB-dependent outer membrane receptor precursor	NA	1078	A1670	B542	C143	2835	0	0	0	0	-	NA	NA	NA	NA	-	7	7.1	7.2	7.6	8.2	8.7	9.9	11.2	10.5	9.9	6.1	6.3	10.2	10.4	10.1	10.3	9.9	10.1	8.4	9.4	6.7	6.7	6.8	6.5
THC0290_0370	453885	454571	1	CDS	NA	phoP	THC0290_v2_0384	phoP	Two-component system response regulatory protein involved in phosphate regulation	NA	1069	A1767	B546	C143	687	0	0	0	0	-	NA	NA	NA	NA	-	10	10	9.7	9.8	9.9	10.3	10.4	10.9	10.9	10.9	9.5	9.6	11.4	12	10.7	10.9	12.4	12.5	11.1	11.8	9.7	9.9	10.6	10.5
THC0290_0371	454572	455636	1	CDS	NA	phoR	THC0290_v2_0385	phoR	Two-component system sensor histidine kinase involved in phosphate regulation	NA	2194	A984	B310	C84	1065	0	0	0	0	-	NA	NA	NA	NA	-	9.6	9.5	9.2	9.3	9.2	9.2	9.5	9.7	9.3	8.8	9.3	9.1	9.4	9.1	9.6	9.6	9.6	9.8	8.5	9.3	9.5	9.5	9.9	10.1
THC0290_0372	455757	457094	1	CDS	NA	oprP	THC0290_v2_0386	oprP	Probable phosphate-selective porin precursor	NA	730	A1492	B512	C143	1338	0	0	0	0	-	NA	NA	NA	NA	-	9.2	9.3	10.2	10.8	12.4	12.5	12.6	12.6	12.4	11.8	9.4	10	11.3	11.5	11.6	11.8	12.1	12.1	11.2	11.4	9.2	8.9	10.1	9.3
THC0290_0373	457114	457947	1	CDS	NA	pstS	THC0290_v2_0387	pstS	ABC-type phosphate-transport system, binding protein precursor component PstS	NA	731	A1492	B512	C143	834	0	0	0	0	-	NA	NA	NA	NA	-	9.8	9.9	11.1	11.9	13.5	13.7	13.9	13.3	14.7	13.7	10.2	10.7	12.4	12.3	13	13.3	12.2	12.5	12.3	12.4	9.6	9.5	10.3	9.8
THC0290_N_0274	457948	458037	1	Region	intra				new transcription segment	pstC(CDS:THC0290_0374);pstS(CDS:THC0290_0373)	729	A1492	B512	C143	90	0	0	0	0	-	0	NA	NA	NA	-	6.7	7.2	8.2	8.6	10.4	10.2	11.2	10.2	11.5	10.7	7.2	7.7	9.5	9.1	10.6	10.2	9.9	10	9.2	8.8	6.9	6	7.5	6.9
THC0290_0374	458038	459189	1	CDS	NA	pstC	THC0290_v2_0388	pstC	ABC-type phosphate-transport system, permease component PstC	NA	725	A1492	B512	C143	1152	0	0	0	0	-	NA	NA	NA	NA	-	9.3	9.4	10.5	11.1	12.9	13.2	13.6	12	13.5	13	9.6	9.9	11.3	10.6	12.2	12.3	11.6	11.7	11.3	10.7	9.3	8.8	9.6	9.1
THC0290_0375	459193	460137	1	CDS	NA	pstA	THC0290_v2_0389	pstA	ABC-type phosphate-transport system, permease component PstA	NA	726	A1492	B512	C143	945	0	0	0	0	-	NA	NA	NA	NA	-	9.1	9.2	10.1	10.8	12.5	12.3	13.3	11.5	12.7	11.9	9.3	9.7	10.5	9.9	11.9	11.9	11.1	11	10.3	9.9	9	8.3	9.4	8.9
THC0290_0376	460164	460922	1	CDS	NA	pstB	THC0290_v2_0390	pstB	ABC-type phosphate-transport system, ATPase component PstB	NA	727	A1492	B512	C143	759	0	0	0	0	-	NA	NA	NA	NA	-	9.7	9.9	10.5	11.2	12.6	12.6	13.2	11.3	12.2	12.2	9.9	10.3	10.8	10.4	11.8	12	11.5	11.5	11.1	11.3	9.6	9.3	10.1	9.6
THC0290_0377	460961	461689	1	CDS	NA	phoU	THC0290_v2_0391	phoU	Phosphate transport system protein PhoU	NA	728	A1492	B512	C143	729	0	0	0	0	-	NA	NA	NA	NA	-	9.7	9.8	10.6	11	12.6	12.8	12.8	12.1	11.6	12.3	9.8	10.2	10.8	10.2	11.7	12.1	11.2	11.4	10.9	11	9.6	9.4	10	9.7
THC0290_0378	461753	462799	-1	CDS	NA		THC0290_v2_0392		Probable glycosyl transferase	NA	567	A1401	B481	C139	1047	0	0	0	0	-	NA	NA	NA	NA	-	7	7.1	6.7	6.9	7.3	7.6	7.9	8.3	7.2	6.6	6.9	6.6	7.6	7.1	7.2	7.2	7.7	8.4	7.7	8.6	6.9	6.9	7	7
THC0290_0379	462838	463659	-1	CDS	NA		THC0290_v2_0393		Protein of unknown function	NA	1079	A1670	B542	C143	822	0	0	0	0	-	NA	NA	NA	NA	-	6.3	6.4	6.5	6.7	8.2	8.5	9	9.8	9.3	8.7	6.2	6.4	9.8	10.1	8.9	9.1	9.6	9.5	7.1	7.9	6.2	6.7	6.2	6.1
THC0290_0380	463782	464456	1	CDS	NA	trmB	THC0290_v2_0394	trmB	tRNA (guanine-N(7)-)-methyltransferase	NA	2206	A846	B256	C70	675	0	0	0	0	-	NA	NA	NA	NA	-	10.4	10.4	9.8	9.8	9.7	9.9	9.8	9.9	10.4	10.5	9.9	9.9	10.1	10.2	10	9.9	10.5	10.1	10.1	11.1	10.4	10.4	10.6	10.8
THC0290_N_0275	464457	464504	1	Region	intra				new transcription segment	NA(CDS:THC0290_0381);trmB(CDS:THC0290_0380)	3072	A571	B183	C44	48	0	0	0	0	-	0	NA	NA	NA	-	12.1	12.2	11.9	11.7	11.7	12.1	11.6	10.9	11.4	12.2	11.7	11.5	11.2	10.3	10.8	10.9	10.5	11.2	11.1	9.5	12.2	12.4	12.3	12.5
THC0290_0381	464505	465146	1	CDS	NA		THC0290_v2_0395		Probable transmembrane protein of unknown function. Putative amino-acid efflux protein	NA	2803	A861	B260	C70	642	0	0	0	0	-	NA	NA	NA	NA	-	10.5	10.1	9.6	9.7	9.4	9.1	9.7	9.9	9.9	9.6	9.6	9.3	8.7	9.5	9.2	9.2	9.3	9.3	8.7	10	10.4	10.2	10.5	10.5
THC0290_0382	465233	465565	1	CDS	NA	ogt2	THC0290_v2_0396	ogt2	Methylated-DNA--[protein]-cysteine S-methyltransferase	NA	2427	A175	B63	C19	333	1	1	0	0	THC0290_N_0276	NA	NA	NA	NA	-	9.2	9	8.2	8.5	8.5	8.4	8.8	9	9.2	8.9	8.4	8.1	7.8	7.2	7.7	8.1	5.2	7.2	5.4	7.5	9.3	9.1	9.1	9.4
THC0290_N_0276	465495	465656	-1	Region	3prime				new transcription segment	NA(CDS:THC0290_0383)	2410	A162	B61	C19	162	2	1	1	0	THC0290_0382;THC0290_N_0277	0	NA	NA	NA	-	6.6	6.6	6.5	6.6	7.3	7.7	7.8	8.9	6.8	7.4	6.3	6.2	7	6.5	7.1	7.1	7.8	3.9	3.9	3.9	6.6	6.7	6.6	7
THC0290_N_0277	465566	466070	1	Region	3prime				new transcription segment	ogt2(CDS:THC0290_0382)	2434	A132	B53	C18	505	2	1	1	0	THC0290_0383;THC0290_N_0276	0	NA	NA	NA	-	7.4	7.1	6	6.3	5.8	6.7	6	8.3	5.4	6.4	6.4	5.6	3.9	4	4	4.5	5.4	4.3	4.3	4	7.4	7.2	6.4	7.5
THC0290_0383	465657	466046	-1	CDS	NA		THC0290_v2_0397		Protein of unknown function precursor	NA	1380	A1766	B546	C143	390	1	1	0	0	THC0290_N_0277	NA	NA	NA	NA	-	7.5	7.5	7.7	8	8.3	8.5	8.9	10	9	8.9	7.7	7.8	9.5	9.5	9	8.5	9.4	9.7	9.1	9.4	7.5	7.7	7.7	7.8
THC0290_N_0278	466184	466264	1	Region	5prime				new transcription segment	actA(CDS:THC0290_0384)	2930	A423	B163	C44	81	0	0	0	0	-	0	NA	NA	NA	-	12.6	12.6	12.2	12.4	11.8	12.1	11.5	9.7	10.8	11.3	12.1	11.9	11	9.8	11	11.2	10.9	11.4	12.5	11.6	12.6	12.8	12.2	12.5
THC0290_0384	466265	467587	1	CDS	NA	actA	THC0290_v2_0398	actA	Alternative complex III, protein A	NA	2931	A423	B163	C44	1323	0	0	0	0	-	NA	NA	NA	NA	-	13.8	13.7	13.4	13.6	13	12.7	12.5	11.4	11.7	11.5	13.1	12.9	11.2	10.6	11.8	11.9	11.9	11.8	12.4	12.3	13.8	13.8	13.6	13.7
THC0290_N_0279	467588	467676	1	Region	intra				new transcription segment	actB(CDS:THC0290_0385);actA(CDS:THC0290_0384)	2934	A425	B163	C44	89	0	0	0	0	-	0	NA	NA	NA	-	14.9	15.1	15.3	14.7	14.4	14.5	14	12.7	12.9	13.2	14.4	14.4	12.7	15.3	13.9	13.4	13.2	13.3	14.3	15.1	14.9	14.9	14.9	14.9
THC0290_0385	467677	470706	1	CDS	NA	actB	THC0290_v2_0399	actB	Alternative complex III, protein B precursor	NA	3313	A601	B183	C44	3030	0	0	0	0	-	NA	NA	NA	NA	-	14.3	14.3	13.7	13.9	13.1	12.8	12.7	12.5	12	11.4	13.7	13.4	11	10.8	11.9	12	11.9	11.8	12.1	12.3	14.2	14.1	14.1	14.2
THC0290_N_0280	470707	470799	1	Region	intra				new transcription segment	actC(CDS:THC0290_0386);actB(CDS:THC0290_0385)	2932	A424	B163	C44	93	0	0	0	0	-	0	NA	NA	NA	-	12.2	12	11.6	11.6	11.1	10.2	10.7	10.5	10.6	10	11.3	11.4	9.2	10	10.8	11	10.7	10.5	10.8	11.6	12.2	12.2	11.9	11.9
THC0290_0386	470800	472206	1	CDS	NA	actC	THC0290_v2_0400	actC	Alternative complex III, protein C	NA	3318	A601	B183	C44	1407	0	0	0	0	-	NA	NA	NA	NA	-	14.3	14.2	13.7	13.9	13.3	13.1	13.1	13.7	12.3	11.8	13.6	13.2	11.1	10.6	12.3	12.3	12	11.9	12.2	12.3	14.2	14	14.2	14.2
THC0290_0387	472213	472737	1	CDS	NA	actD	THC0290_v2_0401	actD	Alternative complex III, protein D	NA	3319	A601	B183	C44	525	0	0	0	0	-	NA	NA	NA	NA	-	14.3	14.3	13.9	14	13.4	13	13	13.7	12.3	11.7	13.8	13.7	10.9	10.6	12.2	12.3	12	11.9	12.3	12.3	14.2	14.2	14.3	14.3
THC0290_0388	472746	473291	1	CDS	NA	actE	THC0290_v2_0402	actE	Alternative complex III, protein E precursor	NA	3317	A601	B183	C44	546	0	0	0	0	-	NA	NA	NA	NA	-	14.4	14.3	13.8	14	13.3	13.1	12.9	13.4	12.1	11.6	13.6	13.5	11.1	10.6	12.1	12.2	11.7	12	12.4	12.1	14.3	14.3	14.3	14.4
THC0290_0389	473317	474762	1	CDS	NA	actF	THC0290_v2_0403	actF	Alternative complex III, protein F	NA	3315	A601	B183	C44	1446	0	0	0	0	-	NA	NA	NA	NA	-	14.4	14.2	13.6	13.8	13.2	12.9	13	13.6	11.7	11.4	13.6	13.3	11	10.3	12	12	11.8	11.8	11.9	11.9	14.2	14.1	14.2	14.3
THC0290_0390	474781	475953	1	CDS	NA	ctaC	THC0290_v2_0404	ctaC	Cytochrome c oxidase, subunit II	NA	3316	A601	B183	C44	1173	0	0	0	0	-	NA	NA	NA	NA	-	14.3	14.3	13.8	13.9	13.3	13	12.9	13.5	11.9	11.5	13.6	13.5	11	10.9	12.1	12	12	11.9	12.2	12.6	14.3	14.1	14.3	14.4
THC0290_0391	475985	477790	1	CDS	NA	ctaD	THC0290_v2_0405	ctaD	Cytochrome c oxidase, subunit I	NA	3314	A601	B183	C44	1806	0	0	0	0	-	NA	NA	NA	NA	-	14	13.8	13.5	13.7	13.1	12.9	12.9	13.4	12.1	11.4	13.3	13.1	10.9	10.6	12	12	11.8	11.8	12	12.2	13.9	13.9	14	14.1
THC0290_N_0281	477791	477858	1	Region	3prime				new transcription segment	ctaD(CDS:THC0290_0391)	454	A1322	B455	C133	68	0	0	0	0	-	0	NA	NA	NA	-	4.2	3.9	3.9	3.9	3.9	3.9	3.9	6	5.6	4	3.9	4	3.9	3.9	3.9	4.3	3.9	4	9.6	3.9	4.1	4.3	4.1	4.2
THC0290_0392	477872	478558	1	CDS	NA		THC0290_v2_0406		Protein of unknown function precursor	NA	1026	A1711	B546	C143	687	0	0	0	0	-	NA	NA	NA	NA	-	9.4	9.3	9	8.9	9.2	9.4	9.9	11.1	10.7	10.3	9	8.7	10.4	10.5	9.8	9.8	10.9	10.7	11.1	11.8	9.3	9.5	9.6	9.7
THC0290_0393	478553	479161	-1	CDS	NA		THC0290_v2_0407		Probable transmembrane protein of unknown function	NA	3862	A142	B55	C18	609	1	1	0	0	THC0290_N_0282	NA	NA	NA	NA	-	6.9	7.1	7	6.8	6.7	6.7	6.3	7.6	6.7	6.6	7.1	7	7.1	6.6	5.9	6.2	4.3	6.2	6.1	5.3	7	7.1	7.5	7
THC0290_N_0282	478559	479025	1	Region	3prime				new transcription segment	NA(CDS:THC0290_0392)	1024	A1711	B546	C143	467	1	0	1	0	THC0290_0393	0	NA	NA	NA	-	9	8.8	8.4	8.5	8.5	8.7	9.2	10.4	9.8	9.4	8.5	8.1	9.4	10	9.2	8.9	9.3	8.9	10.1	9.9	9.1	9.2	8.8	9.1
THC0290_0394	479629	481770	1	CDS	NA		THC0290_v2_0408		Protein of unknown function precursor, putative S46 family serine protease	NA	3327	A605	B183	C44	2142	0	0	0	0	-	NA	NA	NA	NA	-	11.6	11.3	10.9	11	10.5	10.2	10.2	10	10	9.7	11.1	11.1	9.7	10	10	10	9.4	9.6	8.9	9.2	11.3	11.1	11.6	11.5
THC0290_N_0283	481771	481941	1	Region	intra				new transcription segment	NA(Region:THC0290_N_0284);NA(CDS:THC0290_0394)	4239	A268	B96	C28	171	0	0	0	0	-	0	NA	NA	NA	-	11.4	11.1	11.7	11.3	11.3	12.8	11.4	11.1	12.2	13.2	11.8	11.7	12.1	10.7	11	11.3	10.5	11.8	13.8	10.4	11.1	11.8	11.2	11.5
THC0290_N_0284	481943	482257	1	Region	indep	Rfp28			new transcription segment	NA	1033	A1654	B542	C143	315	1	0	1	0	THC0290_0395	0	NA	NA	NA	-	14.9	14.8	15.5	15.7	15.8	15.9	15.6	15.5	16.2	16.3	15.2	15.3	16.3	16.2	15.8	15.3	15.7	15.9	15.8	15.8	14.8	14.9	14.9	14.9
THC0290_0395	481952	482293	-1	CDS	NA		NA		Hypothetical protein	NA	681	A1413	B488	C140	342	1	1	0	0	THC0290_N_0284	NA	NA	NA	NA	-	3.9	4	3.9	4	4.1	3.9	4	4.3	4	4.5	4	4	4	4	4	3.9	5.7	6	7.7	4	4	4	3.9	3.9
THC0290_N_0285	482258	482799	1	Region	3prime				new transcription segment	NA(Region:THC0290_N_0284)	664	A1362	B469	C136	542	1	0	1	0	THC0290_0396	0	NA	NA	NA	-	6.6	6.8	6.5	6.4	6.7	7	7.3	7.1	8	7.8	6.2	6	8.1	8.2	8.3	8	6.6	7.8	8.4	9	6.9	6.7	6.5	6.9
THC0290_0396	482475	482840	-1	CDS	NA		THC0290_v2_0410		Protein of unknown function	NA	133	A1161	B397	C120	366	1	1	0	0	THC0290_N_0285	NA	NA	NA	NA	-	7.3	6.9	5.4	5	4.5	5.8	5.1	5.4	5.3	6.7	5.5	5.9	7.5	6.8	6.7	6.8	7.1	6.6	6.3	8.1	7.5	7.7	7.9	8.7
THC0290_N_0286	483337	483381	-1	Region	3prime				new transcription segment	NA(Region:THC0290_N_0287)	-1	NA	NA	NA	45	0	0	0	0	-	0	NA	NA	NA	-	NA	NA	NA	NA	NA	NA	NA	NA	NA	NA	NA	NA	NA	NA	NA	NA	NA	NA	NA	NA	NA	NA	NA	NA
THC0290_tRNA_0008	483382	483469	-1	tRNA	NA				transfer RNA-Leu	NA	1611	A1769	B546	C143	88	0	0	0	0	-	NA	NA	NA	NA	-	9.1	8.6	8.7	8.7	9.3	11.5	10.6	13.4	12.9	13.6	9.7	9.2	14.2	13.3	11.9	11.7	13.7	14.7	15.4	14.7	9	9.1	8.8	9.1
THC0290_N_0287	483470	483509	-1	Region	intra				new transcription segment	NA(Region:THC0290_N_0286);NA(Region:THC0290_N_0288)	-1	NA	NA	NA	40	0	0	0	0	-	0	NA	NA	NA	-	NA	NA	NA	NA	NA	NA	NA	NA	NA	NA	NA	NA	NA	NA	NA	NA	NA	NA	NA	NA	NA	NA	NA	NA
THC0290_tRNA_0009	483510	483585	-1	tRNA	NA				transfer RNA-Gly	NA	1643	A1769	B546	C143	76	0	0	0	0	-	NA	NA	NA	NA	-	10.4	10	9.9	10.1	10.3	12	11.7	13.1	12.7	13.7	10.4	9.7	13.8	12.4	11.8	11.7	12.8	14.1	15.3	13.5	10.7	10.6	10.2	10.6
THC0290_N_0288	483586	483627	-1	Region	5prime				new transcription segment	NA(Region:THC0290_N_0287)	-1	NA	NA	NA	42	0	0	0	0	-	0	NA	NA	NA	-	NA	NA	NA	NA	NA	NA	NA	NA	NA	NA	NA	NA	NA	NA	NA	NA	NA	NA	NA	NA	NA	NA	NA	NA
THC0290_0397	483724	486324	-1	CDS	NA	mutS	THC0290_v2_0412	mutS	DNA mismatch repair protein MutS	NA	3629	A595	B183	C44	2601	0	0	0	0	-	NA	NA	NA	NA	-	10.4	10.4	10.8	10.8	10.3	10.6	9.8	8.7	9.8	9.4	10.8	10.9	8.3	7.4	8.1	8.6	7.8	8.3	9.5	8.9	10.2	10.3	9.8	9.9
THC0290_0398	486474	486992	1	CDS	NA		THC0290_v2_0413		Protein of unknown function precursor	NA	919	A1618	B535	C143	519	0	0	0	0	-	NA	NA	NA	NA	-	14.2	14.2	15	15.1	15.5	15.8	15.3	15.1	15.1	15	14.8	14.8	16	15.6	15.5	15.7	15.6	15.8	15.8	15.7	13.9	14.5	13.9	13.8
THC0290_N_0289	486993	487056	1	Region	3prime				new transcription segment	NA(CDS:THC0290_0398)	485	A1333	B461	C133	64	0	0	0	0	-	0	NA	NA	NA	-	3.9	3.9	3.9	4	4	4.4	4.3	4.1	4.4	4.5	4	4.1	5.2	6.9	5.4	3.9	7.9	5.6	9.4	3.9	4.3	4	4.2	4.2
THC0290_0399	487057	487605	1	CDS	NA		THC0290_v2_0414		Probable tRNA/rRNA methyltransferase	NA	1299	A1753	B546	C143	549	0	0	0	0	-	NA	NA	NA	NA	-	9	9	8.8	8.9	9.2	9.2	9.7	9.6	9.8	9.7	8.9	8.9	11	11.5	10.8	10.7	11.4	11.2	10.8	10.8	9.1	9.4	9.6	10
THC0290_0400	487602	488744	-1	CDS	NA		THC0290_v2_0415		Probable bifunctional protein : 2-amino-4-hydroxy-6-hydroxymethyldihydropteridine diphosphokinase and deoxynucleoside kinase	NA	2657	A52	B28	C13	1143	1	1	0	0	THC0290_N_0290	NA	NA	NA	NA	-	9.1	9.1	8.8	8.7	8.4	8.5	7.9	8.5	8.1	7.5	8.8	8.8	7.9	7.4	7.3	6.8	7	6.6	7.2	9	9.1	9.1	9.6	9.4
THC0290_N_0290	487606	488796	1	Region	3prime				new transcription segment	NA(CDS:THC0290_0399)	350	A1644	B540	C143	1191	1	0	1	0	THC0290_0400	0	NA	NA	NA	-	7.3	7.2	7.1	7	7.6	7.4	8.3	8.9	8.2	8	7	6.6	9.1	9.1	9.4	9	8.6	8.5	8.2	7.2	7.5	7.4	7.2	8
THC0290_N_0291	488798	488867	1	Region	5prime				new transcription segment	sppA(CDS:THC0290_0401)	2202	A851	B256	C70	70	0	0	0	0	-	0	NA	NA	NA	-	8.7	8.8	8.7	8.3	8.7	8.1	8.4	7.9	8.6	8.9	8.5	8.8	9	9.4	9	9.3	9.6	9.2	9.7	9.4	8.9	8.8	9	9.1
THC0290_0401	488868	490631	1	CDS	NA	sppA	THC0290_v2_0416	sppA	Protease IV (signal peptide peptidase)	NA	129	A1395	B479	C139	1764	0	0	0	0	-	NA	NA	NA	NA	-	11	11	10.6	10.7	10.6	10.3	10.4	10.4	10.2	9.9	10.5	10.4	10.7	10.5	10.8	10.9	11.2	11.1	11.8	12.2	11	11	11.1	11.2
THC0290_0402	490800	493382	1	CDS	NA		THC0290_v2_0417		Outer membrane protein precursor, AsmA family	NA	379	A1260	B422	C125	2583	1	1	0	0	THC0290_N_0292	NA	NA	NA	NA	-	11.8	11.8	11.9	11.8	11.7	11.8	11.5	11	10.7	10.7	11.7	11.9	11.3	10.9	11.4	11.6	11.1	11.1	11.9	11.5	11.9	11.9	11.8	11.7
THC0290_N_0292	493173	493641	-1	Region	3prime				new transcription segment	NA(CDS:THC0290_0403)	2386	A196	B70	C21	469	2	1	1	0	THC0290_0402;THC0290_N_0293	0	NA	NA	NA	-	6.5	6.7	6.5	6.8	7.1	7.1	7.3	7.6	6.8	7.2	6.4	6.6	3.9	3.9	5.7	5.7	4.1	4	3.9	3.9	6.9	6.7	6.3	6.5
THC0290_N_0293	493383	493951	1	Region	3prime				new transcription segment	NA(CDS:THC0290_0402)	367	A1262	B422	C125	569	2	1	1	0	THC0290_0403;THC0290_N_0292	0	NA	NA	NA	-	7.1	6.6	6.2	6.5	6.8	6.8	6.7	8.6	6.5	7.4	6.8	6.1	7.7	7.5	7.2	6.2	7.4	6.5	6.8	4.7	7	7.2	6.6	7.1
THC0290_0403	493642	494436	-1	CDS	NA		THC0290_v2_0418		Protein of unknown function	NA	936	A1768	B546	C143	795	1	1	0	0	THC0290_N_0293	NA	NA	NA	NA	-	9.4	9.5	9.7	9.7	10.3	10.5	10.6	11.4	11.2	10.9	9.7	9.9	10.5	10.7	10.1	10.1	11	11	11.6	11.7	9.4	9.5	9.3	9.3
THC0290_N_0294	494437	494488	-1	Region	5prime				new transcription segment	NA(CDS:THC0290_0403)	840	A1552	B523	C143	52	0	0	0	0	-	0	NA	NA	NA	-	7.7	7.9	7.9	7.8	8.3	7.8	10	8.1	8.8	9.3	7.8	7.9	11.8	17.1	15.9	13.2	13.7	11.5	15.4	16.9	7.6	7.6	7.1	7.9
THC0290_0404	494527	495138	1	CDS	NA		THC0290_v2_0419		Protein of unknown function	NA	3925	A76	B35	C14	612	0	0	0	0	-	NA	NA	NA	NA	-	8.8	8.9	9.2	9.1	8.7	8.9	8.1	9.3	8.6	8.5	9.5	9.4	9.5	9.8	8.4	8.4	9.8	10.1	10.3	10.3	8.6	9.2	8.7	8.7
THC0290_0405	495160	496668	1	CDS	NA		THC0290_v2_0420		Protein of unknown function	NA	3169	A558	B183	C44	1509	1	1	0	0	THC0290_N_0295	NA	NA	NA	NA	-	9.7	9.9	10	10	9.5	9.2	8.6	9	8.4	7.8	10.4	10.5	8	8.2	7.6	7.7	8.6	7.5	8.4	8.5	9.8	9.8	9.6	9.3
THC0290_N_0295	496366	496703	-1	Region	3prime				new transcription segment	kdtA(CDS:THC0290_0406)	2747	A280	B102	C28	338	1	0	1	0	THC0290_0405	0	NA	NA	NA	-	5.9	6.1	5.8	5.9	5.9	6.2	5.7	7.3	6.4	4.5	6	5.5	4.5	3.9	4	3.9	4.1	6.5	7	4	5.7	6.6	5.6	6.2
THC0290_0406	496704	497933	-1	CDS	NA	kdtA	THC0290_v2_0421	waaA	3-deoxy-D-manno-octulosonic-acid transferase	NA	2723	A505	B177	C44	1230	0	0	0	0	-	NA	NA	NA	NA	-	8.7	8.6	8.5	8.4	8.3	8.4	8.2	8.4	8.6	8.5	8.7	8.4	7.3	7	7	7.8	6.1	5.4	7.8	5.8	8.5	8.8	8.6	8.6
THC0290_N_0296	498014	498078	1	Region	5prime				new transcription segment	porR(CDS:THC0290_0407)	3967	A334	B125	C35	65	0	0	0	0	-	0	NA	NA	NA	-	11.7	11.6	11.9	11.7	11.4	12.3	11.8	11.4	12	12.4	12.1	11.8	11.8	11	11.1	11.3	11.4	12.2	13	12.2	11.8	11.7	11.7	11.9
THC0290_0407	498079	499212	1	CDS	NA	porR	THC0290_v2_0422	porR	PorR protein, probably involved in biosynthesis of cell surface polysaccharide	NA	3423	A595	B183	C44	1134	0	0	0	0	-	NA	NA	NA	NA	-	12.9	12.7	12.9	12.7	12.5	12.8	12.5	12.1	12.4	12	12.9	12.9	11.6	11.1	11.5	11.6	11.6	11.8	11.8	11.8	12.9	12.8	12.8	12.7
THC0290_N_0297	499213	499323	1	Region	intra				new transcription segment	galE(CDS:THC0290_0408);porR(CDS:THC0290_0407)	2728	A101	B45	C16	111	1	0	0	1	THC0290_flavo-1_0020	0	NA	NA	NA	-	11.8	11.8	11.7	11.7	11.5	11.8	11.5	11.8	11.9	12	11.8	11.7	10.5	10.4	10.3	10.4	10.6	10.3	11.2	11.5	11.8	11.6	11.7	11.6
THC0290_flavo-1_0020	499225	499296	-1	misc_RNA	NA				Flavo-1 RNA	NA	1515	A1765	B546	C143	72	1	1	0	0	THC0290_N_0297	NA	NA	NA	NA	-	6.5	6.2	5.8	6.4	6.5	6.6	6.7	8.9	8.9	8.1	6.1	5.7	7.8	10.1	8.4	7.8	11.2	9.8	9.9	11.8	6.4	6.2	6.1	6.2
THC0290_0408	499324	500355	1	CDS	NA	galE	THC0290_v2_0423	galE	UDP-glucose 4-epimerase	NA	3359	A601	B183	C44	1032	0	0	0	0	-	NA	NA	NA	NA	-	11.9	11.8	11.8	11.6	11.2	11.4	11	11.2	10.3	10.1	11.7	11.7	9.4	8.5	9.4	9.5	8.7	9.2	9.5	7.1	11.9	11.8	11.5	11.8
THC0290_N_0298	500352	500565	-1	Region	3prime-PT				new transcription segment	NA	1376	A1760	B546	C143	214	1	1	0	0	THC0290_N_0299	0	NA	NA	NA	-	6.9	6.7	7.2	7.1	8.9	9.7	9.6	10.4	11	11.3	7.5	7.3	10.7	11.4	8.9	8.4	10.6	10.6	11.1	9.6	6.5	7	6.9	6.4
THC0290_N_0299	500356	500589	1	Region	3prime				new transcription segment	galE(CDS:THC0290_0408)	3017	A566	B183	C44	234	2	2	0	0	THC0290_N_0298;THC0290_N_0300	0	NA	NA	NA	-	11	11.2	10.9	11	10.8	11.5	10.1	11.1	9.8	10.1	11	10.8	9.3	6.1	8.4	8.8	7.7	9.1	9.4	5.3	11	11.1	10.5	10.7
THC0290_N_0300	500566	500599	-1	Region	3prime				new transcription segment	NA(CDS:THC0290_0409)	-1	NA	NA	NA	34	1	1	0	0	THC0290_N_0299	0	NA	NA	NA	-	NA	NA	NA	NA	NA	NA	NA	NA	NA	NA	NA	NA	NA	NA	NA	NA	NA	NA	NA	NA	NA	NA	NA	NA
THC0290_0409	500600	500857	-1	CDS	NA		THC0290_v2_0424		Hypothetical lipoprotein precursor	NA	956	A1613	B535	C143	258	0	0	0	0	-	NA	NA	NA	NA	-	12.9	12.9	13.5	13.4	13.8	15.2	13.6	15.2	14.7	15.2	13.8	13.8	15.2	13.9	13.4	13.4	13.6	15.1	15.4	13.7	12.7	13	12.8	12.6
THC0290_N_0301	500882	501008	-1	Region	intra				new transcription segment	NA(CDS:THC0290_0409);fabD(CDS:THC0290_0410)	3508	A609	B183	C44	127	0	0	0	0	-	0	NA	NA	NA	-	11.8	11.8	11.4	11.3	10.5	10.1	10	9.2	10	9.9	11.4	11.4	9.7	9.9	9.8	9.6	9.6	9.7	10.1	9	11.6	11.6	11.8	11.6
THC0290_0410	501009	501881	-1	CDS	NA	fabD	THC0290_v2_0425	fabD	Malonyl CoA-acyl carrier protein transacylase	NA	3511	A609	B183	C44	873	0	0	0	0	-	NA	NA	NA	NA	-	11.6	11.7	11.2	11.2	10.1	9.8	9.9	8.2	9.8	9.5	11.3	11.2	9.4	9.7	9.5	9.5	10.2	9.7	9.6	10	11.5	11.3	11.7	11.5
THC0290_N_0302	501882	501923	-1	Region	5prime				new transcription segment	fabD(CDS:THC0290_0410)	-1	NA	NA	NA	42	0	0	0	0	-	0	NA	NA	NA	-	NA	NA	NA	NA	NA	NA	NA	NA	NA	NA	NA	NA	NA	NA	NA	NA	NA	NA	NA	NA	NA	NA	NA	NA
THC0290_N_0303	501925	502073	-1	Region	intra				new transcription segment	fabD(CDS:THC0290_0410);NA(CDS:THC0290_0411)	3180	A587	B183	C44	149	0	0	0	0	-	0	NA	NA	NA	-	8.9	9	8.7	8.5	7.8	7.7	8.5	5.8	7.2	6.7	8.8	8.3	6.4	7.6	6.7	6.8	7.5	4.8	5.9	8.8	9	8.2	9.5	8.9
THC0290_flavo-1_0021	501979	502060	-1	misc_RNA	NA				Flavo-1 RNA	NA	3181	A587	B183	C44	82	0	0	0	0	-	NA	NA	NA	NA	-	8.6	8.6	8.6	8.3	7.6	7.3	8.1	5.4	6.6	6	8.5	8.1	5.9	5.4	5.4	5.8	7.1	4.5	5.9	7.3	8.7	7.8	9.3	8.7
THC0290_0411	502074	502397	-1	CDS	NA		THC0290_v2_0426		Hypothetical protein precursor	NA	2752	A386	B147	C41	324	0	0	0	0	-	NA	NA	NA	NA	-	8.6	9	9	8.7	8	7.8	9	6.2	7.9	7.8	8.8	8.5	8.1	8.7	7.5	7.7	8.7	8.7	6.4	6.5	9	8.1	9.7	9.1
THC0290_0412	502402	502551	-1	CDS	NA		NA		Hypothetical protein	NA	2753	A386	B147	C41	150	0	0	0	0	-	NA	NA	NA	NA	-	9.3	9.5	9.2	9.1	8.5	8.7	9.1	6.4	8.5	8.7	9.1	8.6	9.3	9.6	7.7	8	9.8	10.4	9.7	9.4	9.4	8.3	10	9.3
THC0290_0413	502554	503726	-1	CDS	NA	purT	THC0290_v2_0428	purT	Phosphoribosylglycinamide formyltransferase 2	NA	3179	A587	B183	C44	1173	0	0	0	0	-	NA	NA	NA	NA	-	9.4	9.7	9.5	9.1	8.8	9	9.8	6.8	8.8	9	9.4	8.6	7.1	8.1	7.6	7.4	9	6.7	7.4	8.1	9.8	8.4	10.5	9.7
THC0290_flavo-1_0022	503756	503830	1	misc_RNA	NA				Flavo-1 RNA	NA	2010	A1544	B522	C143	75	0	0	0	0	-	NA	NA	NA	NA	-	6.7	6.5	6.5	6.1	6.3	6	6.7	7.2	7.2	7	6.1	6.7	7.4	7.8	7.3	7.7	8.5	8.3	8.5	9.3	6.3	6.7	6.5	6.7
THC0290_0414	503894	505081	-1	CDS	NA	aspC1	THC0290_v2_0429	aspC1	Probable aspartate transaminase AspC1	NA	3546	A605	B183	C44	1188	0	0	0	0	-	NA	NA	NA	NA	-	13.1	13.2	13.2	13	12.3	12.8	12.8	10.2	12.2	12.5	13.4	13	11.9	11.6	11.6	11.3	12.3	11.6	11.6	11.5	13.4	12.6	13.2	13.1
THC0290_0415	505149	506246	-1	CDS	NA		THC0290_v2_0430		Fatty acid desaturase	NA	2114	A1417	B489	C140	1098	0	0	0	0	-	NA	NA	NA	NA	-	11.3	11.3	11.2	11.3	11.7	11.4	11.8	12.4	11.5	11.8	11.2	11.3	12	11.8	11.9	11.9	11.5	11.7	11.5	12	11.4	11.3	11.8	12.1
THC0290_0416	506352	506981	1	CDS	NA	gidB	THC0290_v2_0431	gidB	Methyltransferase GidB	NA	937	A1760	B546	C143	630	0	0	0	0	-	NA	NA	NA	NA	-	9.5	9.4	9.8	9.9	10.3	10.7	10.6	11	11.3	11.5	9.6	9.6	10.6	10.4	10.4	10.6	10.8	11.1	11.6	11.5	9.3	9.6	9.9	9.9
THC0290_N_0304	506982	507043	1	Region	3prime				new transcription segment	gidB(CDS:THC0290_0416)	842	A1552	B523	C143	62	1	1	0	0	THC0290_N_0305	0	NA	NA	NA	-	5.4	5	5.1	5.3	7.2	6.2	9.5	5.8	7.7	7.3	5.8	5.3	11.2	17.1	15.9	13.3	13.9	11	15.2	16.9	5.3	5.7	4.9	6.2
THC0290_N_0305	507011	507057	-1	Region	3prime				new transcription segment	pruA(CDS:THC0290_0417)	-1	NA	NA	NA	47	1	1	0	0	THC0290_N_0304	0	NA	NA	NA	-	NA	NA	NA	NA	NA	NA	NA	NA	NA	NA	NA	NA	NA	NA	NA	NA	NA	NA	NA	NA	NA	NA	NA	NA
THC0290_0417	507058	508683	-1	CDS	NA	pruA	THC0290_v2_0432	pruA	1-pyrroline-5-carboxylate dehydrogenase	NA	2539	A227	B83	C25	1626	0	0	0	0	-	NA	NA	NA	NA	-	13.8	13.8	14.4	14.4	14.5	14.7	14.9	12.4	15	14.7	14.3	14.2	13.4	12.7	13.6	13.6	12.9	13	13.2	12.8	13.8	13.4	13.7	13.5
THC0290_N_0306	508684	508742	-1	Region	5prime				new transcription segment	pruA(CDS:THC0290_0417)	4203	A1051	B346	C102	59	0	0	0	0	-	0	NA	NA	NA	-	13.1	13.3	13.9	13.6	13.7	15.2	13.9	11.9	14.1	15.3	14	13.7	14.5	13.3	13.2	13.1	13.7	14.6	15.1	13.9	13.4	12.9	13.2	13
THC0290_flavo-1_0023	509305	509448	1	misc_RNA	NA				Flavo-1 RNA	NA	574	A1288	B434	C126	144	0	0	0	0	-	NA	NA	NA	NA	-	4.5	4.9	4.4	5.1	4.6	4.8	4.8	4.3	5.7	5.4	4.8	4.8	6	3.9	5.8	4.4	3.9	5.7	4.7	7.5	4.2	4.1	4.7	4.8
THC0290_0418	509450	509836	-1	CDS	NA	apaG	THC0290_v2_0434	apaG	Protein ApaG	NA	1158	A1702	B546	C143	387	0	0	0	0	-	NA	NA	NA	NA	-	12	11.9	12.6	12.2	12.9	13.6	13.4	13.8	12.8	13.3	12.6	12.5	14	13.8	12.9	12.3	15.3	15.2	15.4	15.6	12.2	12.4	11.7	11.6
THC0290_0419	509904	511157	-1	CDS	NA		THC0290_v2_0435		Protein of unknown function precursor	NA	625	A1748	B546	C143	1254	0	0	0	0	-	NA	NA	NA	NA	-	9.8	9.6	9.7	9.4	9.5	10	9.7	9.7	10.2	9.9	9.8	9.8	11.4	10.7	11.2	10.7	11.3	11.6	11.3	10.9	10.1	9.9	9.4	9.4
THC0290_0420	511214	511990	-1	CDS	NA		THC0290_v2_0436		Probable methyltransferase	NA	3651	A600	B183	C44	777	0	0	0	0	-	NA	NA	NA	NA	-	10.3	10.1	9.6	9.7	9.4	9.4	9.3	10.1	9.5	9.1	9.8	9.6	8.6	8.3	8.5	8.4	6.6	8.2	7	9	10.4	10.2	10	10.3
THC0290_0421	511991	512515	-1	CDS	NA		THC0290_v2_0437		Hypothetical protein	NA	2909	A471	B170	C44	525	0	0	0	0	-	NA	NA	NA	NA	-	10.7	10.7	10	10.1	10	9.7	10	11.7	10.4	10.2	10.2	10.3	9.5	9.9	9.9	9.8	9.4	8.9	10.1	9.7	10.7	10.9	10.6	10.6
THC0290_0422	512508	513815	-1	CDS	NA		THC0290_v2_0438		Protein of unknown function	NA	2910	A471	B170	C44	1308	0	0	0	0	-	NA	NA	NA	NA	-	11.9	12	11.5	11.4	11.6	11.2	11.3	12.4	11.2	11.6	11.5	11.7	11.2	11.4	11.1	11.4	11.1	11.2	11.1	11.4	11.9	12.1	12	11.8
THC0290_N_0307	513830	513903	-1	Region	intra				new transcription segment	NA(CDS:THC0290_0422);map(CDS:THC0290_0423)	2695	A461	B168	C44	74	0	0	0	0	-	0	NA	NA	NA	-	10.1	9.9	9.3	9.4	9.4	8.9	9.6	10.9	10	10.2	9.6	9.7	9.8	10.5	10.1	10.1	9.3	9.1	8.5	5.4	10	10	10.2	10.3
THC0290_0423	513904	514722	-1	CDS	NA	map	THC0290_v2_0439	map	Methionine aminopeptidase	NA	513	A1569	B528	C143	819	0	0	0	0	-	NA	NA	NA	NA	-	11.9	11.8	11.7	11.6	11.9	12.1	12.1	12.4	12.2	12.8	11.8	11.8	12.3	12.3	12.1	11.9	12.6	12.7	13	12.6	12	12.1	12.2	12.3
THC0290_0424	514770	516161	-1	CDS	NA		THC0290_v2_0440		Probable outer membrane efflux protein precursor	NA	1088	A1719	B546	C143	1392	0	0	0	0	-	NA	NA	NA	NA	-	8.2	8.5	8.4	8.1	8	8.1	8.1	9.3	9	9.7	8.3	8.3	11.9	12	11.5	11.1	11	11.1	8.9	9.1	8.6	8.5	8.8	9.3
THC0290_0425	516165	517523	-1	CDS	NA		THC0290_v2_0441		Probable ABC-type transport system, membrane fusion efflux protein component	NA	1089	A1719	B546	C143	1359	0	0	0	0	-	NA	NA	NA	NA	-	8.7	8.7	8.7	8.4	8.9	8.9	9.4	9.5	10.3	10.6	8.7	8.8	13.3	13.3	12.5	11.8	12.2	12	9.7	9.6	9.1	9	9.3	9.6
THC0290_0426	517529	519190	-1	CDS	NA		THC0290_v2_0442		Probable ABC-type transport system, ATPase and permease components	NA	1090	A1719	B546	C143	1662	0	0	0	0	-	NA	NA	NA	NA	-	8.5	8.6	8.4	8.4	8.9	8.4	9	10.2	10.3	10.6	8.5	8.6	13	13.6	12.6	11.9	12.2	11.7	9	9.4	8.8	8.8	9.3	9.5
THC0290_0427	519196	519870	-1	CDS	NA		THC0290_v2_0443		Probable transcriptional regulator, TetR family	NA	1087	A1719	B546	C143	675	0	0	0	0	-	NA	NA	NA	NA	-	7.8	7.8	7.5	7.4	7.6	7.2	7.8	9.6	9.5	10.5	7.5	7.6	13.6	14.1	12.1	11.4	14.1	14.3	11.3	11.7	8	8.1	8.1	8.4
THC0290_0428	520020	521288	1	CDS	NA	cat2	THC0290_v2_0444	cat2	4-hydroxybutyrate coenzyme A transferase	NA	618	A1108	B371	C109	1269	0	0	0	0	-	NA	NA	NA	NA	-	11.4	11.3	11.7	11.8	12.2	11.8	12.4	11.9	12.8	12.7	11.8	11.9	11.9	11.7	12	12.1	11.6	11.7	12.1	11.6	11.1	11.3	10.8	10.7
THC0290_N_0308	521289	521329	1	Region	3prime				new transcription segment	cat2(CDS:THC0290_0428)	-1	NA	NA	NA	41	0	0	0	0	-	0	NA	NA	NA	-	NA	NA	NA	NA	NA	NA	NA	NA	NA	NA	NA	NA	NA	NA	NA	NA	NA	NA	NA	NA	NA	NA	NA	NA
THC0290_0429	521589	522020	1	CDS	NA		THC0290_v2_0445		Hypothetical transmembrane protein	NA	751	A1509	B519	C143	432	0	0	0	0	-	NA	NA	NA	NA	-	8.1	8	8.3	8.3	9.9	9.7	10.6	11.7	10.7	10.6	7.9	8	9.1	9.3	9.2	9.6	8.8	9.5	9.8	9.5	7.7	7.8	8.7	8.6
THC0290_N_0309	522021	522213	1	Region	3prime				new transcription segment	NA(CDS:THC0290_0429)	752	A1509	B519	C143	193	0	0	0	0	-	0	NA	NA	NA	-	8.6	8.7	9.2	9.3	10.9	11.7	12.3	13.7	11.7	11.5	9	8.9	10.3	10.2	10.1	10.3	10.3	10	11.1	10.4	8.5	9	9.5	9.7
THC0290_N_0310	522214	522414	1	Region	3prime-PT				new transcription segment	NA	2330	A771	B233	C66	201	0	0	0	0	-	0	NA	NA	NA	-	8	8.1	8.1	8	9.1	9.4	10	8.9	8.4	9	7.9	7.7	9.2	6	9	8.9	6.8	8.1	9	9.5	8.3	7.8	9.1	9.2
THC0290_0430	522415	524397	1	CDS	NA		THC0290_v2_0447		Cation-transporting ATPase, P-type	NA	1778	A1765	B546	C143	1983	0	0	0	0	-	NA	NA	NA	NA	-	9.6	9.5	10.5	10.5	11.1	11.2	11.6	10.2	12	12.1	10.8	10.6	13	13	12.5	12	12.3	12.1	11.4	11.4	9.7	9.2	9.6	9.3
THC0290_N_0311	524398	524889	1	Region	intra				new transcription segment	NA(Region:THC0290_N_0312);NA(CDS:THC0290_0430)	1673	A1765	B546	C143	492	0	0	0	0	-	0	NA	NA	NA	-	7.3	7.4	7.9	8.2	8.9	8.8	9.1	10.5	10.2	9.9	8.3	8.1	10.8	11.2	10.3	10	10.4	10.2	9.6	8.4	7.5	7.5	7	7
THC0290_miscRNA_0002	524890	524985	1	misc_RNA	NA				TPP riboswitch [THI element]	NA	1511	A1765	B546	C143	96	0	0	0	0	-	NA	NA	NA	NA	-	9.1	8.9	9.2	9.2	10.3	11	10.8	11	12.1	12.1	9.4	9.3	12.8	13.2	11.4	11.2	13.6	13.4	13.5	13.6	9.4	9.4	9.2	9.5
THC0290_N_0312	524986	525051	1	Region	intra				new transcription segment	thiS(CDS:THC0290_0431);NA(Region:THC0290_N_0311)	4407	A729	B209	C54	66	0	0	0	0	-	0	NA	NA	NA	-	8.9	8.8	9.2	9.1	10.2	10.3	10.8	11.5	12.1	12.1	8.8	9.2	12.3	12.5	11.5	11	13.4	12.9	12.7	13.6	9.6	9.6	9.4	9.7
THC0290_0431	525052	525258	1	CDS	NA	thiS	THC0290_v2_0448	thiS	Thiamine biosynthesis protein ThiS	NA	4410	A730	B209	C54	207	0	0	0	0	-	NA	NA	NA	NA	-	6.8	6.7	6.9	6.9	7.4	7.5	8	8.1	9.8	9.8	6.9	6.7	10.7	10.8	9.5	9.1	11	11.2	10.4	10.2	7.5	7.3	7.7	7.8
THC0290_N_0313	525259	525356	1	Region	intra				new transcription segment	thiC(CDS:THC0290_0432);thiS(CDS:THC0290_0431)	4411	A730	B209	C54	98	0	0	0	0	-	0	NA	NA	NA	-	5.8	5.6	6.2	5.7	6.4	6.6	7	6.6	9	9.2	5.9	5.9	9.3	9.4	8.7	8.1	8.6	8.8	8.5	8.1	6.9	6.6	7	7.2
THC0290_0432	525357	527180	1	CDS	NA	thiC	THC0290_v2_0449	thiC	Thiamine biosynthesis protein ThiC	NA	4409	A730	B209	C54	1824	0	0	0	0	-	NA	NA	NA	NA	-	7.8	7.8	7.9	8	8.2	8	9	6.5	10.3	10.1	7.9	7.7	9.7	9.3	9.6	9.3	9.4	8.9	8.4	8.9	8.7	7.9	9.2	9.1
THC0290_N_0314	527181	527231	1	Region	intra				new transcription segment	thiE1(CDS:THC0290_0433);thiC(CDS:THC0290_0432)	4415	A728	B209	C54	51	0	0	0	0	-	0	NA	NA	NA	-	6.6	7	6.8	7.1	6.9	6.8	7.7	5.1	8.8	8.8	7	6.6	6.5	6.6	7.9	7.4	3.9	7.1	4.8	5.2	7.7	7	8	8.1
THC0290_0433	527232	527831	1	CDS	NA	thiE1	THC0290_v2_0450	thiE1	Thiamine-phosphate diphosphorylase	NA	4416	A728	B209	C54	600	0	0	0	0	-	NA	NA	NA	NA	-	7.2	7	7.3	7.1	7.2	7.1	8.1	5.1	8.6	8.1	7.3	6.9	7.5	7.1	7.6	7.5	6.9	4.1	3.9	6.7	7.8	7.3	8.2	8.3
THC0290_0434	527804	528562	1	CDS	NA	thiD	THC0290_v2_0451	thiD	Phosphomethylpyrimidine kinase	NA	4419	A728	B209	C54	759	0	0	0	0	-	NA	NA	NA	NA	-	6.8	6.8	6.6	6.7	6.8	6.8	7	5.5	7.3	7.4	6.6	6.6	5.7	5.3	7	6.8	6.8	6.4	8.1	5.7	7.6	7	8	7.9
THC0290_0435	528555	529175	1	CDS	NA	thiE2	THC0290_v2_0452	thiE2	Thiamine-phosphate diphosphorylase	NA	4413	A728	B209	C54	621	0	0	0	0	-	NA	NA	NA	NA	-	7.1	7.1	7.1	6.9	7	7.1	7.2	6.2	7	7.4	7	6.8	7.4	8.9	7.8	7	8.1	5.3	6.9	9.4	7.6	7.1	8	8.2
THC0290_0436	529175	529945	1	CDS	NA	thiG	THC0290_v2_0453	thiG	Thiazole biosynthesis protein ThiG	NA	4420	A728	B209	C54	771	0	0	0	0	-	NA	NA	NA	NA	-	7.1	7.1	7.2	7.2	7.1	7.1	7.4	5.5	7.6	7.8	7	7	6.3	6.3	7.1	7.1	6.2	5.9	7.3	4.5	7.7	7.4	7.9	8
THC0290_N_0315	529946	530070	1	Region	intra				new transcription segment	thiH(CDS:THC0290_0437);thiG(CDS:THC0290_0436)	4414	A728	B209	C54	125	0	0	0	0	-	0	NA	NA	NA	-	7.4	7.6	7.5	7.4	7.2	7	7.7	5.4	8.1	7.7	7.4	7.4	6.4	7.9	7.6	7.2	9	8	6.1	7.7	8.1	7.2	8	8.1
THC0290_0437	530071	531192	1	CDS	NA	thiH	THC0290_v2_0454	thiH	Thiazole biosynthesis protein ThiH	NA	4418	A728	B209	C54	1122	0	0	0	0	-	NA	NA	NA	NA	-	7.6	7.7	7.4	7.5	7.3	7.2	7.9	6.1	8.2	7.4	7.6	7.5	7.2	5.9	7.5	7.3	6.8	5.1	5.1	4.6	8	7.7	8.3	8.2
THC0290_0438	531214	531924	1	CDS	NA	thiF	THC0290_v2_0455	thiF	Molybdopterin and thiamine biosynthesis protein	NA	4417	A728	B209	C54	711	0	0	0	0	-	NA	NA	NA	NA	-	7.3	7.3	7.2	7	7	6.8	7.3	5.7	6.9	6.5	7.1	7	4.5	6	6.4	6.5	4.6	4.9	6.1	7.3	7.7	7.4	7.9	8.1
THC0290_0439	531998	532705	1	CDS	NA	pyrH	THC0290_v2_0456	pyrH	UMP kinase	NA	3995	A302	B113	C32	708	0	0	0	0	-	NA	NA	NA	NA	-	12.3	12.4	12	12	12	11.9	11.6	11.8	11.9	12.1	12	12.1	11.9	12.6	11.6	11.6	13.2	13.3	12.4	12.5	12.5	12.6	12.6	12.6
THC0290_N_0316	532706	532751	1	Region	intra				new transcription segment	frr(CDS:THC0290_0440);pyrH(CDS:THC0290_0439)	-1	NA	NA	NA	46	0	0	0	0	-	0	NA	NA	NA	-	NA	NA	NA	NA	NA	NA	NA	NA	NA	NA	NA	NA	NA	NA	NA	NA	NA	NA	NA	NA	NA	NA	NA	NA
THC0290_0440	532752	533315	1	CDS	NA	frr	THC0290_v2_0457	frr	Ribosome recycling factor	NA	3557	A634	B183	C44	564	0	0	0	0	-	NA	NA	NA	NA	-	12.8	12.7	12.2	12.4	12.4	12.1	12	12.5	12.4	12.2	12.3	12.3	11.9	12.2	12.1	12.1	11.8	11.8	11.8	11.6	12.7	13	12.7	12.9
THC0290_N_0317	533316	533367	1	Region	3prime				new transcription segment	frr(CDS:THC0290_0440)	-1	NA	NA	NA	52	0	0	0	0	-	0	NA	NA	NA	-	NA	NA	NA	NA	NA	NA	NA	NA	NA	NA	NA	NA	NA	NA	NA	NA	NA	NA	NA	NA	NA	NA	NA	NA
THC0290_N_0318	533368	533474	1	Region	intra				new transcription segment	NA(CDS:THC0290_0441);frr(CDS:THC0290_0440)	1983	A1697	B546	C143	107	0	0	0	0	-	0	NA	NA	NA	-	9.2	9.1	9.1	8.6	8.6	9	8.9	9.8	9.5	10.7	9	9.1	11.7	11	9.8	9.6	11.5	12.6	12.6	10.3	9.5	9.6	9.9	10.1
THC0290_0441	533475	534557	1	CDS	NA		THC0290_v2_0458		Probable secreted exopolyphosphatase precursor	NA	2132	A1411	B487	C140	1083	0	0	0	0	-	NA	NA	NA	NA	-	10.8	10.7	10.6	10.6	10.4	10.4	10.3	11.2	10.9	10.9	10.8	10.9	11.3	11.1	10.8	10.9	11.1	11	11.2	11.7	10.6	10.9	11.2	11
THC0290_N_0319	534558	534754	1	Region	intra				new transcription segment	NA(CDS:THC0290_0442);NA(CDS:THC0290_0441)	2129	A1847	B567	C148	197	0	0	0	0	-	0	NA	NA	NA	-	10.9	9.9	11.5	11.2	11.1	11.2	10.9	11.3	11.3	11.6	11.3	11.5	11.6	11.7	11.3	11.4	10.9	11.1	11.2	10.6	11	11.2	11.4	11.1
THC0290_0442	534755	535996	1	CDS	NA		THC0290_v2_0459		Major facilitator superfamily (MFS) permease	NA	2133	A1411	B487	C140	1242	0	0	0	0	-	NA	NA	NA	NA	-	10.1	10	9.9	9.7	9.8	10.1	10	10.9	10.7	10.8	10.1	9.9	10.7	10.6	10.6	10.5	10.5	10.4	11	11.3	9.8	10.1	10.2	10.2
THC0290_N_0320	535997	536054	1	Region	intra				new transcription segment	NA(CDS:THC0290_0443);NA(CDS:THC0290_0442)	2131	A1607	B535	C143	58	0	0	0	0	-	0	NA	NA	NA	-	8.9	8.9	8.8	8.6	8.9	9.3	8.9	9.1	9.5	10.5	8.9	9	9.8	9.5	9.2	9.4	9.5	10	10.9	9.7	9	9.1	9.2	9.2
THC0290_0443	536055	536963	1	CDS	NA		THC0290_v2_0460		Probable transmembrane protein of unknown function	NA	2130	A1019	B327	C89	909	0	0	0	0	-	NA	NA	NA	NA	-	9.6	9.9	9.8	9.3	9.5	9.6	9.4	10	8.3	9.8	9.8	10	9.8	10	9.6	9.6	10.3	10.1	10.5	10.3	10	10	10.1	10.1
THC0290_N_0321	536964	537059	1	Region	intra				new transcription segment	NA(CDS:THC0290_0444);NA(CDS:THC0290_0443)	2355	A275	B100	C28	96	0	0	0	0	-	0	NA	NA	NA	-	8.4	8.3	8.1	7.9	7.7	8.1	7.4	9.3	7.8	7.6	8.2	8.2	7.3	7	7.2	7.1	7.7	7.4	8.5	7.9	8.3	8.7	8.3	8.4
THC0290_0444	537060	539312	1	CDS	NA		THC0290_v2_0461		Probable outer membrane protein precursor	NA	2356	A274	B100	C28	2253	1	1	0	0	THC0290_N_0322	NA	NA	NA	NA	-	7.6	7.6	7.4	7.1	6.9	7.3	6.8	7.6	6.5	6.7	7.6	7.4	5.9	7.2	6.4	6.3	3.9	4.6	6.7	7.1	7.8	8.1	7.5	7.7
THC0290_N_0322	539143	539314	-1	Region	3prime				new transcription segment	NA(CDS:THC0290_0445)	19	A1872	B578	C149	172	1	0	1	0	THC0290_0444	0	NA	NA	NA	-	7.8	7.9	8.7	8.9	9.7	9.3	9.7	11.9	10.2	9.8	8.3	8.5	8.3	8.8	9.2	8.6	7.7	7.8	8.7	6.2	7.9	8	8.6	8.4
THC0290_N_0323	539313	539818	1	Region	3prime				new transcription segment	NA(CDS:THC0290_0444)	194	A1835	B563	C145	506	1	0	1	0	THC0290_0445	0	NA	NA	NA	-	4.8	4.5	4.4	4.7	4.1	5.1	4.3	7.8	3.9	5.2	4.2	4.4	3.9	3.9	3.9	4.1	3.9	3.9	3.9	3.9	4	5.2	4	4.4
THC0290_0445	539315	541585	-1	CDS	NA		THC0290_v2_0462		Probable Na+/H+ antiporter	NA	960	A1609	B535	C143	2271	1	1	0	0	THC0290_N_0323	NA	NA	NA	NA	-	9.1	9	9.3	9.1	9.3	9.7	9.4	9.9	9.7	9.9	9.2	9.1	10	9.9	9.3	9.3	9.7	9.7	10	9.9	9.1	9.1	9.5	9.4
THC0290_0446	542293	542667	1	CDS	NA		THC0290_v2_0463		Protein of unknown function	NA	623	A1581	B531	C143	375	0	0	0	0	-	NA	NA	NA	NA	-	10.2	10.8	10.3	10.2	9.9	9.9	9.5	10.1	9.9	9.9	11.3	11.5	12.8	12.3	12.3	12.4	12.6	12.4	13.1	13.1	10.6	10.7	10.4	9.8
THC0290_0447	542738	543226	-1	CDS	NA		THC0290_v2_0464		Acetyltransferase, GNAT family	NA	4145	A1122	B375	C109	489	0	0	0	0	-	NA	NA	NA	NA	-	10	10.2	10.7	10.8	11.4	11.5	11	12.5	11.1	11.3	10.5	10.7	10.6	10.4	10.8	11.1	10.1	10.3	10.9	10.1	10.2	10.3	10	10.1
THC0290_0448	543236	544480	-1	CDS	NA		THC0290_v2_0465		Major facilitator superfamily (MFS) permease	NA	4146	A1123	B375	C109	1245	0	0	0	0	-	NA	NA	NA	NA	-	10.2	10.3	10.7	10.8	10.9	10.8	10.7	12	10.8	10.7	10.6	10.6	10.2	10.4	10.5	10.8	9.6	9.5	10.1	10.2	10.2	10.2	10.2	10.3
THC0290_0449	544671	545915	-1	CDS	NA	ilvA	THC0290_v2_0466	ilvA	Threonine ammonia-lyase	NA	84	A1197	B412	C124	1245	0	0	0	0	-	NA	NA	NA	NA	-	7.2	7.1	6.9	6.9	7.1	7.1	8	6.7	7.9	7.8	7.1	7.1	9.2	9.2	9.2	9.1	8.9	8.7	8	8.7	7.3	7.3	7.6	8.1
THC0290_0450	545912	546958	-1	CDS	NA	ilvC	THC0290_v2_0467	ilvC	Ketol-acid reductoisomerase	NA	87	A1197	B412	C124	1047	0	0	0	0	-	NA	NA	NA	NA	-	7.1	6.9	6.4	6.4	6.3	6.1	6.5	5.3	6.3	6.5	6.6	6.5	9	9.5	9.1	9	7.5	6.5	7.1	7.5	7.1	7	7.3	7.6
THC0290_0451	546976	547506	-1	CDS	NA	ilvH	THC0290_v2_0468	ilvH	Acetolactate synthase, small subunit	NA	85	A1197	B412	C124	531	0	0	0	0	-	NA	NA	NA	NA	-	7.1	7	6.3	6.2	5.9	5.5	6.3	4.7	6.6	6.1	6.7	6.2	9.1	9.4	9	8.8	8.9	4	6	8.4	7.2	7.1	7.4	7.8
THC0290_0452	547513	549207	-1	CDS	NA	ilvB	THC0290_v2_0469	ilvB	Acetolactate synthase, large subunit	NA	88	A1197	B412	C124	1695	0	0	0	0	-	NA	NA	NA	NA	-	6.8	6.7	5.6	5.7	5.2	5	6	4.2	6.7	5.9	6.2	6.1	8.6	8.4	8.5	7.9	7.6	7	8.2	7.1	6.9	6.5	7.2	7.4
THC0290_0453	549225	550901	-1	CDS	NA	ilvD	THC0290_v2_0470	ilvD	Dihydroxy-acid dehydratase	NA	86	A1197	B412	C124	1677	0	0	0	0	-	NA	NA	NA	NA	-	6.9	6.7	6.3	6.1	5.8	5.7	6.2	4.5	7.3	6.3	6.2	5.9	8.9	9.3	8.7	8.3	9.4	7.9	6.6	5.8	6.9	6.8	7.2	7.5
THC0290_0454	550915	551790	-1	CDS	NA	ilvE	THC0290_v2_0471	ilvE	Branched-chain-amino-acid transaminase	NA	83	A1196	B412	C124	876	0	0	0	0	-	NA	NA	NA	NA	-	6.4	5.9	5.5	5.4	4.8	4.9	5.5	4.7	5.4	5.3	5.4	5.2	8.6	8.2	8	7.7	4.1	5.7	6.5	3.9	6.3	6.2	6.7	7
THC0290_N_0324	551791	552228	-1	Region	5prime				new transcription segment	ilvE(CDS:THC0290_0454)	3958	A905	B281	C77	438	0	0	0	0	-	1	552145,552219,-	0.843	75	MRKFNIIPSIIIAIVIITTAKGML	9	9.2	7.8	7.9	6.3	8.3	6.8	8.5	8.4	10.3	8.1	7.8	10.9	10	9.7	9.9	9.6	10.4	10.6	6.5	9.1	9.3	9.2	9
THC0290_N_0325	552526	552622	1	Region	5prime				new transcription segment	NA(CDS:THC0290_0455)	4045	A1133	B380	C111	97	0	0	0	0	-	0	NA	NA	NA	-	10.7	11	11.9	11.4	11	11.7	10.7	10.8	10.3	11.4	11.9	11.9	11.2	10.3	10.5	10.6	11.1	11.5	12.4	11.9	10.9	10.9	10.7	10.6
THC0290_0455	552623	553387	1	CDS	NA		THC0290_v2_0472		Protein of unknown function	NA	4046	A1134	B380	C111	765	0	0	0	0	-	NA	NA	NA	NA	-	12.5	12.8	13.4	13.1	12.6	12.8	11.9	11.6	10.4	11.4	13.3	13.6	11.5	11.2	11.2	11.3	11.5	11.9	12.4	12.8	12.6	12.6	12.7	12.3
THC0290_N_0326	553386	553649	-1	Region	3prime				new transcription segment	NA(CDS:THC0290_0456)	4519	A703	B199	C52	264	1	1	0	0	THC0290_N_0328	0	NA	NA	NA	-	8.7	8.7	9	9.1	8.6	8.3	7.7	9.4	7.3	7.4	9	9	9.7	9.2	9.9	9.7	5.8	7.7	9.1	7.9	8.9	8.7	8.9	8.5
THC0290_N_0327	553388	553431	1	Region	3prime				new transcription segment	NA(CDS:THC0290_0455)	-1	NA	NA	NA	44	1	1	0	0	THC0290_N_0326	0	NA	NA	NA	-	NA	NA	NA	NA	NA	NA	NA	NA	NA	NA	NA	NA	NA	NA	NA	NA	NA	NA	NA	NA	NA	NA	NA	NA
THC0290_N_0328	553432	553812	1	Region	3prime-PT				new transcription segment	NA	2366	A87	B41	C15	381	2	1	1	0	THC0290_0456;THC0290_N_0326	0	NA	NA	NA	-	7.5	7.6	8.1	7.9	8.9	9.5	8.8	9.3	8.2	8.8	8.1	8	7.8	7.6	6.5	6.8	5.6	7.5	8.2	8.4	7.9	7.7	7.8	7.2
THC0290_0456	553650	554273	-1	CDS	NA		THC0290_v2_0473		Putative sensor (PAS) domain for methyl-accepting chemotaxis sensory transducer	NA	4520	A702	B199	C52	624	1	1	0	0	THC0290_N_0328	NA	NA	NA	NA	-	10.5	11	11.2	11.1	9.9	10.2	8.4	9.3	7.7	8.3	11.2	11.5	10.3	9.9	10.4	10.9	8.5	9.1	9.2	10.8	10.6	10.8	10.6	10
THC0290_N_0329	554274	554291	-1	Region	5prime				new transcription segment	NA(CDS:THC0290_0456)	-1	NA	NA	NA	18	0	0	0	0	-	0	NA	NA	NA	-	NA	NA	NA	NA	NA	NA	NA	NA	NA	NA	NA	NA	NA	NA	NA	NA	NA	NA	NA	NA	NA	NA	NA	NA
THC0290_N_0330	554387	554437	-1	Region	3prime				new transcription segment	tsf(CDS:THC0290_0457)	-1	NA	NA	NA	51	0	0	0	0	-	0	NA	NA	NA	-	NA	NA	NA	NA	NA	NA	NA	NA	NA	NA	NA	NA	NA	NA	NA	NA	NA	NA	NA	NA	NA	NA	NA	NA
THC0290_0457	554438	555262	-1	CDS	NA	tsf	THC0290_v2_0474	tsf	Elongation factor Ts (EF-Ts)	NA	3227	A599	B183	C44	825	0	0	0	0	-	NA	NA	NA	NA	-	14.5	14.5	13.6	13.6	12.3	12.2	12.3	12.9	12.4	12.9	13.7	13.5	13.1	13.3	13.2	13.1	12.5	12.2	11.1	10.5	14.4	14.5	14.6	14.6
THC0290_N_0331	555263	555363	-1	Region	intra				new transcription segment	tsf(CDS:THC0290_0457);rpsB(CDS:THC0290_0458)	3228	A599	B183	C44	101	0	0	0	0	-	0	NA	NA	NA	-	14.1	13.9	12.9	12.9	11.5	11.3	11.9	11.8	12	12.3	13.1	12.9	12.5	12.8	12.6	12.6	11.9	11.4	10.3	8.5	13.9	13.8	14.3	14.4
THC0290_0458	555364	556164	-1	CDS	NA	rpsB	THC0290_v2_0475	rpsB	30S ribosomal protein S2	NA	3106	A638	B183	C44	801	0	0	0	0	-	NA	NA	NA	NA	-	15	14.9	14.4	14.4	13.4	13.5	13.7	13.2	13.7	13.9	14.4	14.3	14.1	14.1	14.1	13.9	13.3	13.3	12.5	11.5	15	14.9	15	15.1
THC0290_N_0332	556165	556317	-1	Region	intra				new transcription segment	rpsB(CDS:THC0290_0458);rpsI(CDS:THC0290_0459)	3107	A638	B183	C44	153	0	0	0	0	-	0	NA	NA	NA	-	15.6	15.7	15.1	15.2	14.2	14	14.6	13.4	14.6	14.8	15.1	15.2	14.6	14.6	14.9	14.5	14.2	14	13.3	12.8	15.6	15.5	15.6	15.6
THC0290_0459	556318	556704	-1	CDS	NA	rpsI	THC0290_v2_0476	rpsI	30S ribosomal protein S9	NA	3105	A638	B183	C44	387	0	0	0	0	-	NA	NA	NA	NA	-	15.2	15.4	15	14.9	14.2	14.1	14.5	13.1	14.8	14.8	15	15	14.8	15	15.1	14.6	14.5	14.3	13.6	13.4	15.5	15.3	15.3	15.4
THC0290_0460	556704	557159	-1	CDS	NA	rplM	THC0290_v2_0477	rplM	50S ribosomal protein L13	NA	4004	A886	B275	C75	456	0	0	0	0	-	NA	NA	NA	NA	-	15	15	14.7	14.5	13.8	13.9	14.1	13.1	14.6	14.9	14.7	14.5	15.2	15.1	14.7	14.3	15	14.7	14.2	14	15.2	15	15.1	15.2
THC0290_flavo-1_0024	557831	557909	1	misc_RNA	NA				Flavo-1 RNA	NA	1893	A1243	B419	C125	79	0	0	0	0	-	NA	NA	NA	NA	-	6.4	6.1	6.5	6.4	6.5	6.6	6.8	6.7	8.1	8	6.5	6.2	7.7	7.4	7.2	7.2	7.7	8	9.7	9.8	6.3	6.4	6.4	6.5
THC0290_0461	557960	560380	-1	CDS	NA	nrdA	THC0290_v2_0479	nrdA	Ribonucleoside-diphosphate reductase, alpha subunit	NA	2762	A382	B145	C41	2421	0	0	0	0	-	NA	NA	NA	NA	-	13.1	13.1	12.8	12.5	12.4	12.4	12.3	10.7	12.8	12.6	12.9	12.8	12.5	12.3	12.8	12.7	12.1	12	11.5	11.1	13.3	12.8	12.9	13
THC0290_N_0333	560381	560718	-1	Region	intra				new transcription segment	nrdA(CDS:THC0290_0461);nrdB(CDS:THC0290_0462)	2306	A879	B271	C74	338	0	0	0	0	-	0	NA	NA	NA	-	13.3	13.3	12.9	12.7	12.8	12.3	12.6	12.4	13	12.4	12.8	13.1	12.6	12.9	12.8	12.7	12.4	12	11.9	12.9	13.4	13.4	13.2	13.3
THC0290_flavo-1_0025	560447	560526	-1	misc_RNA	NA				Flavo-1 RNA	NA	4006	A878	B270	C74	80	0	0	0	0	-	NA	NA	NA	NA	-	12	12	11.5	11.4	11.3	10.7	11.1	10.7	12.1	11.5	11.7	11.9	11.3	12.1	11.9	11.7	12.4	11.1	11.4	13.1	12.1	11.9	12.1	12
THC0290_0462	560719	561696	-1	CDS	NA	nrdB	THC0290_v2_0480	nrdB	Ribonucleoside-diphosphate reductase, beta subunit	NA	2307	A879	B271	C74	978	0	0	0	0	-	NA	NA	NA	NA	-	12.4	12.5	11.8	12	11.9	11.2	11.5	12	12.3	11.8	12.1	12.2	11.7	12	12	11.8	11.2	11	10.6	10.8	12.4	12.3	12.6	12.4
THC0290_N_0334	561697	561746	-1	Region	5prime				new transcription segment	nrdB(CDS:THC0290_0462)	857	A1548	B523	C143	50	0	0	0	0	-	0	NA	NA	NA	-	4.2	4	4	4.1	4.1	4.1	3.9	4.3	5.1	4	3.9	4.2	6.7	7.4	4.1	3.9	8.8	7.8	6	8.5	4.1	4.7	4	3.9
THC0290_0463	561944	562513	-1	CDS	NA		THC0290_v2_0481		Protein of unknown function	NA	2222	A965	B307	C84	570	0	0	0	0	-	NA	NA	NA	NA	-	10.1	10.3	9.8	9.6	9.9	10	10.1	9.7	11.2	11.4	9.9	9.8	11.5	11.5	10.9	10.6	10.7	10.9	10.6	10.1	10.5	10.6	10.5	10.9
THC0290_0464	562739	563317	1	CDS	NA		THC0290_v2_0483		MarC family integral membrane protein	NA	585	A1503	B515	C143	579	0	0	0	0	-	NA	NA	NA	NA	-	11	10.9	11	11.1	11.3	11	11.3	11.8	11.8	11.7	10.9	10.8	11.2	11.7	11.4	11.4	12	11.1	11.6	11.7	10.9	10.9	10.5	10.5
THC0290_0465	563356	563559	1	CDS	NA		THC0290_v2_0484		Hypothetical protein	NA	1291	A1753	B546	C143	204	0	0	0	0	-	NA	NA	NA	NA	-	12	11.9	12	12.1	12.3	12.1	12.4	12.6	12.7	12.6	11.8	11.9	14.2	14.5	13.6	13.3	14.8	14.9	14.7	15	11.8	12.2	12	11.8
THC0290_0466	563559	564167	1	CDS	NA		THC0290_v2_0485		Putative pyridine nucleotide-disulphide oxidoreductase, class-II family protein	NA	1294	A1753	B546	C143	609	1	1	0	0	THC0290_N_0335	NA	NA	NA	NA	-	10.9	10.8	10.6	11	11.1	10.9	11.3	11.5	11.6	11.2	10.6	10.5	12.9	13.6	12.7	12.3	13.3	13.1	12.8	13.4	10.8	10.9	10.9	10.9
THC0290_N_0335	563975	564212	-1	Region	3prime				new transcription segment	NA(CDS:THC0290_0467)	3842	A759	B225	C62	238	1	0	1	0	THC0290_0466	0	NA	NA	NA	-	6.6	6.5	6.5	6.6	6.2	7.1	6.2	7.1	7.3	6.5	6.9	6.8	7.9	5.9	4.4	5.7	5.8	6.1	8.8	8.9	7	7	6.5	7
THC0290_N_0336	564168	564864	1	Region	3prime				new transcription segment	NA(CDS:THC0290_0466)	1846	A1252	B419	C125	697	1	0	1	0	THC0290_0467	0	NA	NA	NA	-	8.7	8.1	7.7	8.1	8.3	7.4	8.3	7.2	9.6	9.3	7.9	8.1	10.6	11.4	10.2	9.5	10.8	10.4	10.3	9.8	8.5	8.3	8.2	8.4
THC0290_0467	564213	565787	-1	CDS	NA		THC0290_v2_0486		Probable membrane associated S41A family C-terminal processing peptidase	NA	3703	A522	B180	C44	1575	1	1	0	0	THC0290_N_0336	NA	NA	NA	NA	-	9.3	9.3	9.1	8.8	8.2	8.2	7.8	6.9	7.6	8	9.3	9.2	8.1	7.9	7.8	7.6	7.8	8	8.1	7.5	9.5	9.3	9.3	9.6
THC0290_N_0337	565788	565860	-1	Region	intra				new transcription segment	NA(CDS:THC0290_0467);NA(CDS:THC0290_0468)	3964	A310	B116	C33	73	0	0	0	0	-	0	NA	NA	NA	-	11	11	10.9	10.8	9.8	10.7	9.3	8.7	9.9	10.3	11.2	10.7	10.8	10.7	10.3	9.4	10.4	10.4	10.6	11.3	11.2	10.7	11.3	11.4
THC0290_0468	565861	566289	-1	CDS	NA		THC0290_v2_0487		dCMP deaminase	NA	3673	A432	B164	C44	429	0	0	0	0	-	NA	NA	NA	NA	-	10.5	10.5	10.5	10.3	9.1	9.4	9.2	6.6	9	9.3	10.6	10.5	9.7	9.1	9.5	9	9.1	9.5	8.5	8.2	10.8	10.4	10.9	11.2
THC0290_N_0338	566290	566469	-1	Region	intra				new transcription segment	NA(CDS:THC0290_0468);NA(CDS:THC0290_0469)	3675	A433	B164	C44	180	1	0	0	1	THC0290_flavo-1_0026	0	NA	NA	NA	-	10.1	10	10.3	10.1	9.6	10.3	9.5	7.8	9.9	9.9	10.6	10.3	10.7	10	9.6	9.4	8.8	10.1	8.4	7.7	10.2	9.7	10.5	10.1
THC0290_flavo-1_0026	566350	566430	1	misc_RNA	NA				Flavo-1 RNA	NA	1935	A1536	B521	C143	81	1	1	0	0	THC0290_N_0338	NA	NA	NA	NA	-	4.7	4.7	4.4	4.6	4.5	4.4	5.2	4.3	6.6	5.5	4.5	4.3	5.6	8.2	6.6	4.5	7.9	4.1	7.4	9.1	5	5	5.1	5.6
THC0290_0469	566470	567063	-1	CDS	NA		THC0290_v2_0488		Probable transmembrane protein of unknown function	NA	3870	A1444	B502	C142	594	0	0	0	0	-	NA	NA	NA	NA	-	10.1	10.3	10.6	10.4	9.8	10.5	9.7	8	10	10.4	10.8	10.6	11.3	10.8	10.4	10.1	10.6	11.3	11.4	10.4	10.4	10.1	10.7	10.5
THC0290_N_0339	567081	567646	-1	Region	3prime-PT				new transcription segment	NA	1374	A1760	B546	C143	566	1	0	1	0	THC0290_0470	0	NA	NA	NA	-	4.9	5.2	6.1	6.4	7.9	8.3	8.7	8.2	9.2	9.3	6.1	5.6	9.9	9.1	8.2	7.1	8.9	10.3	10.4	10.1	5.7	5.1	5.1	4.9
THC0290_0470	567208	567639	1	CDS	NA		THC0290_v2_0489		Protein of unknown function	NA	1455	A1768	B546	C143	432	1	1	0	0	THC0290_N_0339	NA	NA	NA	NA	-	10.9	10.8	10.9	11	11.2	12.3	11.8	13.6	12.4	12.8	11	10.9	14.9	14.4	13.3	13.2	15.2	15.5	15.5	15.4	10.5	11.3	11.1	11.2
THC0290_N_0340	567640	567672	1	Region	3prime				new transcription segment	NA(CDS:THC0290_0470)	-1	NA	NA	NA	33	1	1	0	0	THC0290_N_0341	0	NA	NA	NA	-	NA	NA	NA	NA	NA	NA	NA	NA	NA	NA	NA	NA	NA	NA	NA	NA	NA	NA	NA	NA	NA	NA	NA	NA
THC0290_N_0341	567647	567684	-1	Region	3prime				new transcription segment	uspA(CDS:THC0290_0471)	-1	NA	NA	NA	38	1	1	0	0	THC0290_N_0340	0	NA	NA	NA	-	NA	NA	NA	NA	NA	NA	NA	NA	NA	NA	NA	NA	NA	NA	NA	NA	NA	NA	NA	NA	NA	NA	NA	NA
THC0290_0471	567685	568509	-1	CDS	NA	uspA	THC0290_v2_0490	uspA	Universal stress protein UspA	NA	4223	A1042	B344	C102	825	0	0	0	0	-	NA	NA	NA	NA	-	13.4	13.5	14.6	14.6	15.1	15.3	15	14	14.8	14.4	14.3	14.4	14.7	14.6	14.4	14.2	14.6	14.6	15.1	15.2	13.1	13.2	13	12.8
THC0290_N_0342	568510	568559	-1	Region	5prime				new transcription segment	uspA(CDS:THC0290_0471)	4224	A1042	B344	C102	50	0	0	0	0	-	0	NA	NA	NA	-	12.4	12.4	13.6	13.5	13.9	14.2	13.7	12.9	13.8	13.9	13.6	13.7	13.9	13.6	13.5	13.5	14.1	14.5	15.4	15.3	12	12.2	11.9	11.7
THC0290_N_0343	568633	568691	1	Region	5prime				new transcription segment	NA(CDS:THC0290_0472)	2210	A962	B306	C84	59	0	0	0	0	-	0	NA	NA	NA	-	6.4	6.4	5.8	5.5	4.8	5.3	5.2	6.6	6.3	8.6	6.2	6.1	7.9	7.6	7.5	7.4	7.8	7.2	7.2	8.2	6.5	7	6.4	7
THC0290_0472	568692	569156	1	CDS	NA		THC0290_v2_0491		Protein of unknown function	NA	2809	A784	B238	C67	465	0	0	0	0	-	NA	NA	NA	NA	-	12.8	13.2	12.4	12.3	11.7	11.2	11.5	12.4	11.8	12.2	12.4	12.6	12.4	12.9	12.7	12.7	12.1	11.7	11.1	11.7	12.9	13.3	13	12.9
THC0290_0473	569172	570413	1	CDS	NA	nusA	THC0290_v2_0492	nusA	Transcription elongation protein NusA	NA	3115	A639	B183	C44	1242	0	0	0	0	-	NA	NA	NA	NA	-	13.6	13.5	12.9	12.9	12.2	11.9	12	12.5	12.2	12.5	13	13	12.7	13	13.1	13.1	12.3	12	11.2	11.3	13.6	13.5	13.7	13.8
THC0290_N_0344	570414	570466	1	Region	intra				new transcription segment	infB(CDS:THC0290_0474);nusA(CDS:THC0290_0473)	3116	A639	B183	C44	53	0	0	0	0	-	0	NA	NA	NA	-	14.5	14.6	14.1	13.7	13.2	12.7	12.9	13.4	13.3	14.1	14	14.1	13.8	13.7	13.8	13.9	13	12.9	12.5	11.5	14.5	14.6	14.8	14.9
THC0290_0474	570467	573370	1	CDS	NA	infB	THC0290_v2_0493	infB	Translation initiation factor IF-2	NA	3219	A599	B183	C44	2904	0	0	0	0	-	NA	NA	NA	NA	-	13.5	13.4	12.8	12.8	12.1	11.8	12.1	11.5	12.1	12.4	13.1	12.9	12.4	12.3	12.7	12.6	12	11.9	10.9	10.8	13.5	13.4	13.7	14
THC0290_N_0345	573371	573411	1	Region	3prime				new transcription segment	infB(CDS:THC0290_0474)	-1	NA	NA	NA	41	0	0	0	0	-	0	NA	NA	NA	-	NA	NA	NA	NA	NA	NA	NA	NA	NA	NA	NA	NA	NA	NA	NA	NA	NA	NA	NA	NA	NA	NA	NA	NA
THC0290_N_0346	573619	573816	-1	Region	repeated_region				new transcription segment	NA	1870	A1764	B546	C143	198	0	0	0	0	-	0	NA	NA	NA	-	7.8	7.2	7.9	7.7	8.1	9.3	8.7	9.6	9.9	10.4	8.1	7.8	10.6	9.7	9.5	9.6	9.7	10.5	11.3	10.2	7.6	8	6.9	6.9
THC0290_flavo-1_0027	573966	574053	-1	misc_RNA	NA				Flavo-1 RNA	NA	428	A1243	B419	C125	88	0	0	0	0	-	NA	NA	NA	NA	-	4.9	4.9	5.8	5.3	5.4	5.8	6.4	6.4	6.5	6.7	5.3	5.3	5.7	4.5	7.3	7.2	7.2	6.5	9.5	8.6	5.3	4.8	4.2	4.6
THC0290_rRNA_0001	574936	576435	1	rRNA	NA	16s rRNA			16s ribosomal RNA	NA	-1	A1033	B340	C101	1500	0	0	0	0	-	NA	NA	NA	NA	-	17.1	17.1	17.1	17.1	17.1	17.1	17.1	17.1	17.1	17.1	17.1	17.1	17.1	17.1	17.1	17.1	17.1	17.1	17.1	17.1	17.1	17.1	17.1	17.1
THC0290_tRNA_0010	576546	576622	1	tRNA	NA				transfer RNA-Ile	NA	3840	A762	B226	C62	77	0	0	0	0	-	NA	NA	NA	NA	-	15.3	15.2	14.8	14.7	14.4	14.9	14.9	14.3	15	15.3	15.1	14.6	15.5	14.1	14	13.8	14.3	15.5	16.1	15.1	15.6	15.7	15.2	15.1
THC0290_tRNA_0011	576781	576857	1	tRNA	NA				transfer RNA-Ala	NA	3831	A762	B226	C62	77	0	0	0	0	-	NA	NA	NA	NA	-	15.6	15.4	15.3	14.8	14.9	15.2	15	15	15.2	15.2	15.6	14.8	15.5	14.6	14	13.9	15.4	15.5	16.2	15.4	15.5	16.2	15	15.4
THC0290_rRNA_0002	577071	579955	1	rRNA	NA	23s rRNA			23s ribosomal RNA	NA	-1	A1032	B339	C100	2885	0	0	0	0	-	NA	NA	NA	NA	-	17.1	17.1	17.1	17.1	17.1	17.1	17.1	17.1	17.1	17.1	17.1	17.1	17.1	17.1	17.1	17.1	17.1	17.1	17.1	17.1	17.1	17.1	17.1	17.1
THC0290_N_0347	579956	580112	1	Region	intra				new transcription segment	5s rRNA(rRNA:THC0290_rRNA_0003);23s rRNA(rRNA:THC0290_rRNA_0002)	3100	A637	B183	C44	157	0	0	0	0	-	0	NA	NA	NA	-	14.9	14.9	14.4	14.3	13.7	13.7	13.9	11.8	14.3	14.1	14.6	14.1	13.9	13.8	13.9	13.7	12.9	13.2	13.2	13	15.1	14.9	14.9	14.9
THC0290_rRNA_0003	580113	580218	1	rRNA	NA	5s rRNA			5s ribosomal RNA	NA	-1	A1652	B542	C143	106	0	0	0	0	-	NA	NA	NA	NA	-	15.3	15.2	16.2	15.8	15.9	16.8	16	17.1	16.9	17.1	16.4	15.8	17.1	17.1	16.3	16.1	17.1	17.1	17.1	17.1	15.4	16.1	15.2	15.3
THC0290_0475	580335	580526	-1	gene	NA		THC0290_v2_0497		Transposase (fragment)	NA	1538	A1765	B546	C143	192	0	0	0	0	-	NA	NA	NA	NA	-	7.4	7.3	7.9	7.9	8.6	9	9	10.2	9.8	10	8	8	10.8	10.6	10.1	10	10.5	10.9	11.1	11.8	7.2	7.7	7.1	6.9
THC0290_N_0348	580527	580629	-1	Region	5prime				new transcription segment	NA(gene:THC0290_0475)	1500	A1765	B546	C143	103	0	0	0	0	-	0	NA	NA	NA	-	7.6	7.6	8.2	8.2	9.1	10.4	9.4	10.6	10.3	11.3	8.4	8.3	12.2	11.7	10.4	10.1	11.3	12.2	11.5	10.5	7.9	7.8	8	7.6
THC0290_0476	580874	581557	-1	gene	NA		THC0290_v2_0499		Fragment of transposase (fragment) (part 1)	NA	2023	A1744	B546	C143	684	0	0	0	0	-	NA	NA	NA	NA	-	5.1	5	5.2	5.1	5.2	5.9	5.9	5.1	6.6	6.3	5.1	5.5	6	7.9	5.9	6.1	8.3	7.2	6.7	8.4	5.1	5.2	4.4	4.1
THC0290_0477	581578	581844	-1	gene	NA		THC0290_v2_0500		Truncated transposase IS256 family, N-terminal region	NA	1249	A1768	B546	C143	267	0	0	0	0	-	NA	NA	NA	NA	-	5.9	5.6	5.8	5.9	6.1	6.8	6.4	6.5	6.6	7.5	5.9	6	9.4	9.4	7.2	6.4	9.7	10.6	10	10.3	5.5	5.5	5	5.7
THC0290_0478	582060	583262	1	CDS	NA		THC0290_v2_0501		Transposase IS256 family	NA	2773	A331	B122	C33	1203	0	0	0	0	-	NA	NA	NA	NA	-	11.5	11.6	11.3	11.1	10.4	10.5	9.9	10.6	10.2	10.2	11.5	11.5	10.4	10.5	10.3	10.1	10.5	10.5	11.1	11.5	11.6	11.7	11.4	11.3
THC0290_N_0349	583249	583284	-1	Region	3prime				new transcription segment	NA(gene:THC0290_0479)	-1	NA	NA	NA	36	0	0	0	0	-	0	NA	NA	NA	-	NA	NA	NA	NA	NA	NA	NA	NA	NA	NA	NA	NA	NA	NA	NA	NA	NA	NA	NA	NA	NA	NA	NA	NA
THC0290_0479	583285	583464	-1	gene	NA		THC0290_v2_0502		Truncated transposase IS3 family, central region	NA	312	A1647	B540	C143	180	0	0	0	0	-	NA	NA	NA	NA	-	10.5	10.7	10.6	10.7	10.9	11.8	11.4	12.6	11.4	12.3	11	10.8	13.3	12.4	12.1	11.9	11.6	12.6	12.6	11.3	10.7	11	10.8	10.8
THC0290_N_0350	583465	583562	-1	Region	repeated_region				new transcription segment	NA	2000	A1718	B546	C143	98	0	0	0	0	-	0	NA	NA	NA	-	12.2	12.2	12.5	12.4	12.6	12.9	12.8	13.7	12.9	13.2	12.4	12.5	13.7	15.6	14.4	13.6	13.6	13.1	13.3	13.9	12.2	12.4	12	12.1
THC0290_0480	583563	584543	-1	CDS	NA		THC0290_v2_0503		Probable modification methyltransferase	NA	4331	A1181	B405	C122	981	0	0	0	0	-	NA	NA	NA	NA	-	11.7	11.6	11.6	11.4	11.9	11.8	12	13.2	11.9	12.1	11.7	11.9	12.4	12.5	12.2	12.3	11.7	11.8	11.3	11.2	11.5	11.7	11.4	11.5
THC0290_0481	584540	585397	-1	CDS	NA		THC0290_v2_0504		Probable type II restriction endonuclease	NA	2006	A1718	B546	C143	858	0	0	0	0	-	NA	NA	NA	NA	-	11.6	11.8	11.8	11.7	12.1	12	12.1	13	12	12.7	12	12.1	12.8	13.1	12.6	12.8	12.7	13	12.8	13.2	11.5	12	11.6	11.6
THC0290_N_0351	585398	586012	-1	Region	repeated_region				new transcription segment	NA	1573	A1765	B546	C143	615	0	0	0	0	-	0	NA	NA	NA	-	8.3	8.2	8.4	8.3	8.9	9.2	9.4	10.1	10.4	10.3	8.9	8.7	11.2	11.1	10.6	10.3	10.6	10.8	11.1	11.3	8.3	8.5	8	8.1
THC0290_0482	586087	587670	1	CDS	NA		THC0290_v2_0505		Transposase IS1182 family	NA	1581	A1765	B546	C143	1584	0	0	0	0	-	NA	NA	NA	NA	-	7.4	7.4	7.4	7.4	8.4	8.2	9.3	9.4	10.5	10.5	7.6	7.5	12.4	12.7	11.2	10.6	12.4	12.5	11.8	12.8	7.3	7.2	7.8	7.3
THC0290_0483	587775	588839	-1	CDS	NA		THC0290_v2_0506		Hypothetical transmembrane protein	NA	1586	A1765	B546	C143	1065	0	0	0	0	-	NA	NA	NA	NA	-	8.3	8.3	8.6	8.5	9.1	9	9.1	10.3	10	10.6	8.7	8.9	11.5	11.8	11.3	11.2	10.9	10.9	10.4	11.2	8.3	8.7	8.5	8.1
THC0290_N_0352	588840	589163	-1	Region	repeated_region				new transcription segment	NA	1223	A1765	B546	C143	324	0	0	0	0	-	0	NA	NA	NA	-	9.5	10.1	10.2	10.3	10	10	10.1	11.1	11.3	11.3	10.3	10.5	11.7	11.8	11.2	11	11.3	11.3	12.4	12.3	9.8	9.9	10.2	9.6
THC0290_0484	589164	589526	-1	CDS	NA		THC0290_v2_0507		Protein of unknown function	NA	1246	A1768	B546	C143	363	0	0	0	0	-	NA	NA	NA	NA	-	10.5	10.8	10.9	10.7	11	11.5	11.1	10.8	12.4	12.9	10.8	10.9	13.8	13.3	12.8	12.4	13.4	13.9	13.8	14.1	10.4	10.7	11.1	10.5
THC0290_N_0353	589527	589618	-1	Region	5prime				new transcription segment	NA(CDS:THC0290_0484)	1247	A1768	B546	C143	92	0	0	0	0	-	0	NA	NA	NA	-	11.3	11.4	11.4	11.1	11.4	11.7	11.5	10.9	13	13.3	11.6	11.4	14.1	13.9	13.1	12.8	14.6	14.5	14.3	14.7	11.4	11.4	11.9	11.6
THC0290_N_0354	589619	589720	-1	Region	5prime				new transcription segment	NA(CDS:THC0290_0484)	1319	A1747	B546	C143	102	0	0	0	0	-	0	NA	NA	NA	-	8.4	8.2	7.9	8.1	7.9	8.2	8.4	7.8	9.9	9.6	8.3	8.2	10.1	11.2	10.2	9.3	12.4	10.9	11.7	13	8.7	7.9	8.3	8.4
THC0290_0485	589753	591324	1	CDS	NA		THC0290_v2_0508		Transposase IS1182 family	NA	1582	A1765	B546	C143	1572	0	0	0	0	-	NA	NA	NA	NA	-	7.7	7.7	7.8	7.8	8.5	8.5	9.2	9.4	10.8	10.6	8.1	8	12.3	12.6	11.3	10.7	12.2	12	11	12.5	7.9	7.7	7.8	7.5
THC0290_0486	591334	592536	-1	CDS	NA		THC0290_v2_0509		Transposase IS256 family	NA	2776	A331	B122	C33	1203	0	0	0	0	-	NA	NA	NA	NA	-	11.5	11.6	11.4	11.1	10.4	10.4	10	10.5	10.1	10.2	11.5	11.6	10.4	10.5	10.3	10.2	10.4	10.4	10.8	11.6	11.6	11.6	11.5	11.4
THC0290_0487	592935	594287	1	CDS	NA		THC0290_v2_0510		Protein of unknown function	NA	3792	A841	B255	C69	1353	0	0	0	0	-	NA	NA	NA	NA	-	12.2	12.2	12.2	12	11	10.7	10.6	11.9	10.8	10.7	12.1	12.3	10.5	11.1	10.7	11.1	10.4	10.3	10.6	10.7	12	12.4	11.9	11.8
THC0290_0488	594274	594957	1	CDS	NA		THC0290_v2_0511		Protein of unknown function	NA	3793	A841	B255	C69	684	0	0	0	0	-	NA	NA	NA	NA	-	11.1	11.3	11.3	11.2	10.1	9.9	9.9	11.4	10.4	10.1	11.2	11.4	10.2	10.3	10.2	10.4	9.8	9.9	9.9	9.5	11	11.5	11	11
THC0290_N_0355	594958	595161	1	Region	intra				new transcription segment	NA(CDS:THC0290_0489);NA(CDS:THC0290_0488)	69	A866	B262	C70	204	0	0	0	0	-	0	NA	NA	NA	-	10.3	10.1	9.8	9.8	8.9	9.4	8.9	9.9	9.5	9.7	9.9	9.8	10	9.9	9.6	9.6	8.4	9.3	10.3	10.4	10	10	9.8	10.1
THC0290_0489	595162	596364	1	CDS	NA		THC0290_v2_0512		Transposase IS256 family	NA	2774	A331	B122	C33	1203	0	0	0	0	-	NA	NA	NA	NA	-	11.5	11.5	11.3	11.1	10.4	10.4	10	10.6	10.2	10.1	11.5	11.5	10.3	10.5	10.3	10	10.3	10.5	10.8	11.7	11.6	11.6	11.3	11.3
THC0290_N_0356	596351	596476	-1	Region	3prime				new transcription segment	NA(CDS:THC0290_0490)	2547	A262	B93	C27	126	0	0	0	0	-	0	NA	NA	NA	-	8.6	9.1	9.6	9.8	9.7	10	9.2	10.6	9.4	10.6	9.3	9.6	10	6.5	9.8	9.6	8.4	9.3	10.5	7.3	9.1	9	8.7	8.6
THC0290_0490	596477	596959	-1	CDS	NA		THC0290_v2_0513		Hypothetical lipoprotein precursor	NA	2548	A263	B94	C27	483	0	0	0	0	-	NA	NA	NA	NA	-	11.1	11.2	11.8	11.8	12.1	11.7	11.3	11.6	11	11.6	11.7	11.9	10.4	10.9	11.3	11.7	10.5	10.5	11	10.5	10.9	11	10.6	10
THC0290_0491	596971	598155	-1	CDS	NA	fcpB	THC0290_v2_0514	fcpB	Streptopain family cystein protease precursor	NA	2549	A263	B94	C27	1185	0	0	0	0	-	NA	NA	NA	NA	-	11.7	11.8	12.3	12.4	12.7	12.5	12.1	12.2	12.1	12.4	12.1	12.3	11.3	11.4	11.8	11.9	11.2	11.3	11.6	11.3	11.5	11.6	11.2	10.9
THC0290_N_0357	598156	598542	-1	Region	intra				new transcription segment	fcpB(CDS:THC0290_0491);NA(CDS:THC0290_0492)	1718	A1762	B546	C143	387	0	0	0	0	-	0	NA	NA	NA	-	9.9	10	10.3	10.3	10.8	10.8	10.8	10.8	11.4	11.4	10.3	10.4	11.3	11.1	11.2	11.3	10.8	10.6	11.1	10.6	9.9	10	9.8	9.7
THC0290_0492	598543	599625	-1	CDS	NA		THC0290_v2_0515		Probable transmembrane protein of unknown function	NA	156	A1427	B495	C141	1083	0	0	0	0	-	NA	NA	NA	NA	-	10.1	10.1	10.3	10	10.2	10.6	10.2	10.8	10.6	10.5	10.4	10.4	10.6	10.5	10.3	10.4	10.2	10.4	10.2	10.6	10	10.2	10.2	9.7
THC0290_N_0358	599626	599900	-1	Region	5prime				new transcription segment	NA(CDS:THC0290_0492)	1138	A1769	B546	C143	275	0	0	0	0	-	0	NA	NA	NA	-	9.2	9.2	9.4	9.3	9.6	11.3	10	11.1	10.9	11.7	9.8	9.7	11.7	10.8	10	10	10.8	11.9	12.2	11	9.4	9.4	8.9	9.2
THC0290_0493	599929	600711	-1	CDS	NA		THC0290_v2_0516		Transposase IS3 family	NA	808	A1480	B507	C142	783	0	0	0	0	-	NA	NA	NA	NA	-	7.7	7.7	7.4	7.3	7.3	7.6	7.4	7.1	8.5	8.5	7.4	7.2	9.5	9.9	8.9	8.7	9.7	9.3	8.9	9.5	7.6	7.4	7.3	7.1
THC0290_N_0359	600712	600785	-1	Region	repeated_region				new transcription segment	NA	2267	A956	B302	C82	74	0	0	0	0	-	0	NA	NA	NA	-	7.5	7.7	7.6	7.5	7.6	7.9	7.8	7.2	8.8	9	7.2	7.2	9.4	9.4	8.4	8.4	8	8.5	7.3	4.4	7.6	7.4	7.5	7.1
THC0290_0494	600786	601169	-1	CDS	NA		THC0290_v2_0517		Hypothetical protein	NA	1245	A1768	B546	C143	384	0	0	0	0	-	NA	NA	NA	NA	-	7.2	7.3	7.1	6.8	7.1	7.3	7	7.6	9.1	9	7.1	7	10.9	10.9	9.7	8.5	10.6	10.8	10.1	10.1	7.3	7.3	6.9	7.3
THC0290_0495	601377	601946	-1	CDS	NA		THC0290_v2_0518		Hypothetical protein	NA	2015	A1737	B546	C143	570	0	0	0	0	-	NA	NA	NA	NA	-	4.1	4.4	4.2	4.5	4.6	4.3	4.7	4	4.5	4.2	4	4.1	6.2	6.1	5.9	4.1	7.8	7.1	7.9	9	5	4	4.3	4.5
THC0290_0496	601969	602310	1	gene	NA		THC0290_v2_0519		Truncated transposase IS1182 family	NA	1580	A1765	B546	C143	342	0	0	0	0	-	NA	NA	NA	NA	-	7.4	7.3	7.6	7.6	8	8.6	8.4	9.3	9.7	9.9	8	7.8	11.3	11.1	10	9.5	10.7	10.8	11	11.9	7.4	7.7	7.3	7.4
THC0290_0497	602402	603604	1	CDS	NA		THC0290_v2_0520		Transposase IS256 family	NA	2772	A331	B122	C33	1203	0	0	0	0	-	NA	NA	NA	NA	-	11.6	11.5	11.3	11.2	10.5	10.6	9.9	10.5	10.2	10	11.5	11.4	10.4	10.7	10.2	10.1	10.7	10.4	10.9	12	11.6	11.6	11.4	11.3
THC0290_0498	603925	604707	-1	CDS	NA		THC0290_v2_0522		Hypothetical lipoprotein precursor	NA	4136	A1092	B367	C107	783	0	0	0	0	-	NA	NA	NA	NA	-	7.5	7.5	8.2	8.1	8.9	8.4	9	7.8	8.2	8.9	8.5	8.3	8.2	7.9	9.2	9.3	9	8.1	8	9.7	7.4	7	6.5	6.5
THC0290_N_0360	604737	605191	-1	Region	3prime-PT				new transcription segment	NA	4137	A1093	B367	C107	455	1	0	1	0	THC0290_0499	1	604974,605171,-	0.98	198	MIFLTAFTILLTASMILLTELMIFHNAFTILLTAFMNFEPVITILKPASMNLEHASTISEPANMI	8.5	8.7	9.3	9.2	9.8	9.7	10.2	8.1	9.6	9.8	9.4	9.4	8.9	8.6	9.8	9.7	8.4	9	8.2	9.1	8.8	7.9	7.5	7.5
THC0290_0499	604918	605220	1	CDS	NA		NA		Hypothetical protein	NA	550	A1389	B477	C139	303	2	2	0	0	THC0290_N_0360;THC0290_N_0361	NA	NA	NA	NA	-	4.6	3.9	4.2	4	4.2	4.4	3.9	6.3	5.7	4.8	4.2	4.1	4	6.7	5.2	4.9	4.1	4.1	6.2	9.5	4	4.4	4.5	4.2
THC0290_N_0361	605192	605226	-1	Region	3prime				new transcription segment	NA(CDS:THC0290_0500)	-1	NA	NA	NA	35	1	0	1	0	THC0290_0499	0	NA	NA	NA	-	NA	NA	NA	NA	NA	NA	NA	NA	NA	NA	NA	NA	NA	NA	NA	NA	NA	NA	NA	NA	NA	NA	NA	NA
THC0290_0500	605227	607704	-1	CDS	NA		THC0290_v2_0523		Probable S8 and S53 subtilisin family serine endopeptidase precursor	NA	4138	A1093	B367	C107	2478	0	0	0	0	-	NA	NA	NA	NA	-	9.9	10	10.8	10.7	11.1	10.6	11.1	9.8	11.5	11.2	11	11.3	10.7	10.8	11.1	11.1	10.5	10.4	10.7	10.4	9.8	9.5	9	8.6
THC0290_0501	607701	608105	-1	CDS	NA		THC0290_v2_0524		Hypothetical lipoprotein precursor	NA	1713	A1756	B546	C143	405	0	0	0	0	-	NA	NA	NA	NA	-	9.5	9.7	10.5	10.5	10.9	10.9	10.5	9.4	11.3	11.6	10.7	10.9	11.2	11.2	11	11	11.6	11.3	11.5	11.9	9.4	9.4	8.8	8.3
THC0290_N_0362	608106	608358	-1	Region	5prime				new transcription segment	NA(CDS:THC0290_0501)	1224	A1746	B546	C143	253	0	0	0	0	-	0	NA	NA	NA	-	7.8	7.9	8.2	8.2	8.3	8	8.3	7.6	9.6	9.7	8.3	8.5	9.9	10.1	9.7	9.7	10.7	10.8	10.8	11.4	7.6	7.6	7.6	7.2
THC0290_0502	608390	609994	1	CDS	NA		THC0290_v2_0525		Transposase IS1182 family	NA	1583	A1765	B546	C143	1605	0	0	0	0	-	NA	NA	NA	NA	-	7.1	7.2	7.2	7.3	8.2	8.2	9	9.6	10.6	10.5	7.4	7.4	12.1	12.4	11.2	10.5	12.1	11.9	10.9	12.2	7.3	7.1	7.4	7.2
THC0290_N_0363	609996	610101	-1	Region	repeated_region				new transcription segment	NA	1674	A1765	B546	C143	106	0	0	0	0	-	0	NA	NA	NA	-	10.1	9.8	10.2	10.2	11	11.6	11.6	12.5	12.8	13.2	10.5	10.4	13.6	13.3	12.6	12.6	12.6	13	12.5	12	10	10	9.5	9.4
THC0290_0503	610102	610602	-1	CDS	NA		THC0290_v2_0526		Protein of unknown function precursor	NA	1592	A1765	B546	C143	501	0	0	0	0	-	NA	NA	NA	NA	-	9	8.7	9.4	9.3	10.2	10.7	10.9	11.7	12.1	12.2	9.7	9.8	13.2	13.2	12.5	12.2	12.7	12.8	12.7	12.6	8.6	9.1	8.1	7.8
THC0290_N_0364	610603	610665	-1	Region	5prime				new transcription segment	NA(CDS:THC0290_0503)	1679	A1764	B546	C143	63	0	0	0	0	-	0	NA	NA	NA	-	9.5	9.2	10.2	9.8	10.7	12.4	11.1	12.4	12.2	14	10.5	10.3	15.3	13.5	12.8	12.6	12.8	15.1	15.4	13.2	9.1	9.8	8.6	8.2
THC0290_0504	611442	612659	1	CDS	NA		THC0290_v2_0527		Probable transposase	NA	1591	A1765	B546	C143	1218	0	0	0	0	-	NA	NA	NA	NA	-	8	8	8.2	8.4	9.2	9.2	9.6	10.3	10.8	11	8.1	8.2	11.4	11.9	11.2	10.7	11.6	11	10.5	11.2	8	7.6	7.8	7.6
THC0290_N_0365	612761	612929	1	Region	5prime				new transcription segment	NA(CDS:THC0290_0505)	1760	A1762	B546	C143	169	0	0	0	0	-	0	NA	NA	NA	-	8.6	8.7	9.4	9.4	10.2	11.3	10.1	11.1	10.8	11.3	9.7	9.7	11.3	11.2	10.4	10.1	11.9	12.4	12.6	12.2	8.9	8.7	8.2	7.9
THC0290_0505	612930	613817	1	CDS	NA		THC0290_v2_0529		Protein of unknown function	NA	890	A1593	B534	C143	888	0	0	0	0	-	NA	NA	NA	NA	-	7.4	7.4	7.9	7.9	8.5	8.7	8.4	8.8	8.3	8.4	7.9	8.2	9.7	9.5	8.6	8.4	8.9	9.2	8	7.4	7.5	7.3	7	6.9
THC0290_N_0366	613818	613961	1	Region	intra				new transcription segment	NA(CDS:THC0290_0506);NA(CDS:THC0290_0505)	209	A1818	B557	C145	144	0	0	0	0	-	0	NA	NA	NA	-	5.9	6	6.2	6.4	7.4	8.9	7.4	9.5	7.8	8.6	6.4	6.6	8.9	7.6	6.7	6.3	3.9	8	5.5	6.9	6.3	6.4	5	5
THC0290_0506	613962	614243	1	CDS	NA		THC0290_v2_0530		Protein of unknown function	NA	2119	A1415	B488	C140	282	0	0	0	0	-	NA	NA	NA	NA	-	5.3	4.5	5	5	6.5	7.6	7.3	8.5	8.5	8.5	5.2	5	6.4	7.6	4.7	4.5	8	7.1	4.9	5.6	5.4	5.2	4.3	5.4
THC0290_0507	614341	614829	1	gene	NA		THC0290_v2_0531		Truncated protein of unknown function, N-terminal region	NA	2118	A1415	B488	C140	489	1	1	0	0	THC0290_N_0367	NA	NA	NA	NA	-	4.1	4.2	4	4.1	5.2	5.9	5.9	7.3	4.4	6.4	4	4	3.9	3.9	3.9	4.1	4	4.6	3.9	7.2	3.9	4	3.9	4.6
THC0290_N_0367	614486	614829	-1	Region	repeated_region				new transcription segment	NA	1565	A1768	B546	C143	344	1	0	0	1	THC0290_0507	0	NA	NA	NA	-	4	4.1	4	4.2	5.8	5.5	6.7	8.7	8.8	8.3	4.3	4.5	11.2	11.4	10.3	9.8	10.7	11	10.7	11.2	4.2	4	4	4
THC0290_0508	614830	615714	-1	CDS	NA		THC0290_v2_0532		Transposase IS982 family	NA	1280	A1747	B546	C143	885	0	0	0	0	-	NA	NA	NA	NA	-	11.4	11.4	11.4	11.6	11.4	11.2	11	11.9	11.7	11.8	11.7	11.5	13.6	14.2	13.1	12.9	14.1	14	14	14.6	11.3	11.3	11.1	11.2
THC0290_N_0368	615707	616002	1	Region	repeated_region				new transcription segment	NA	1258	A1768	B546	C143	296	0	0	0	0	-	0	NA	NA	NA	-	8.3	8.2	8.4	8.5	8.6	9.3	8.9	9.5	9	9.6	8.8	8.6	11.4	11	10	9.7	11.4	12	11.5	11.8	8.5	8.7	8.2	8.2
THC0290_0509	616003	617439	1	gene	NA		THC0290_v2_0533		Truncated protein of unknown function, C-terminal region	NA	1840	A1253	B419	C125	1437	0	0	0	0	-	NA	NA	NA	NA	-	6	6	5.7	5.6	5.8	6	6.2	6.8	6.2	6	5.9	5.8	8.3	8.3	7.6	7.3	8.9	8.6	4.3	8.8	5.9	6.4	5.6	6.4
THC0290_N_0369	617835	617953	1	Region	5prime				new transcription segment	NA(CDS:THC0290_0510)	820	A1481	B507	C142	119	0	0	0	0	-	0	NA	NA	NA	-	6.8	6.4	6.7	6.1	6.3	6.4	6.7	6.9	7.3	7.3	6.8	7.1	8.3	9.1	8.7	8.2	8.8	8.9	9.3	6.9	7	7.1	6.8	7.4
THC0290_0510	617954	620056	1	CDS	NA		THC0290_v2_0534		Probable modification methyltransferase	NA	3789	A919	B285	C78	2103	0	0	0	0	-	NA	NA	NA	NA	-	10.6	10.4	10.1	10	10.1	10.1	10.5	10.5	10.7	10.9	10.5	10.6	10.7	10.7	11	10.8	10.3	10.2	9.1	10.2	10.7	10.1	11	11.2
THC0290_0511	620053	621324	1	CDS	NA		THC0290_v2_0535		Probable modification methyltransferase	NA	3087	A646	B183	C44	1272	0	0	0	0	-	NA	NA	NA	NA	-	10.2	9.9	9.3	9.3	9.4	9.1	9.4	10.5	9.3	9.3	9.9	9.7	8.8	9.3	9.5	9.5	8.4	8.7	6.8	6.8	10	10	10.4	10.5
THC0290_0512	621348	626210	1	CDS	NA		THC0290_v2_0536		Protein of unknown function	NA	2638	A367	B140	C39	4863	0	0	0	0	-	NA	NA	NA	NA	-	9.2	9.1	8.7	8.5	8.7	8.7	8.8	9.6	8	8.3	8.9	9.1	7.5	8	7.9	8.6	7.3	8.5	8.8	9.9	9.2	9.1	9.3	9.5
THC0290_0513	626217	629510	1	CDS	NA		THC0290_v2_0537		Probable type I restriction endonuclease	NA	2620	A364	B138	C39	3294	0	0	0	0	-	NA	NA	NA	NA	-	9.2	9.2	8.9	8.9	9.4	9.2	9.5	9.8	8.7	8.3	9.1	9.3	6.9	7.7	8.2	8.2	8.6	8.2	6.2	10.1	9.3	9	9.4	9.4
THC0290_0514	629601	630056	1	CDS	NA		THC0290_v2_0538		Protein of unknown function	NA	2621	A364	B138	C39	456	0	0	0	0	-	NA	NA	NA	NA	-	8.5	8.6	8.2	8.1	8.7	8.4	8.6	9.6	8.2	8.1	8.3	8.4	6.5	6.6	7	7.8	4.9	6	4	9.2	8.5	8.4	8.7	8.9
THC0290_N_0370	630057	630234	1	Region	intra				new transcription segment	NA(CDS:THC0290_0515);NA(CDS:THC0290_0514)	2619	A362	B138	C39	178	0	0	0	0	-	0	NA	NA	NA	-	9.5	9.3	8.9	9.1	9.5	9.6	9.4	10	8.4	8.6	9.1	9.3	6.9	8.5	8.3	8.7	9.2	8.6	8.2	10.8	9	9	9.5	9.4
THC0290_0515	630235	632664	1	CDS	NA		THC0290_v2_0540		Protein of unknown function	NA	2618	A363	B138	C39	2430	0	0	0	0	-	NA	NA	NA	NA	-	9.3	9.2	9.2	9.1	9.6	9.4	9.5	10.4	7.8	8.4	9.2	9.5	7.4	6.3	8	8.4	8.8	7.9	8.1	9	9.1	9	9.6	9.4
THC0290_N_0371	632665	632796	1	Region	repeated_region				new transcription segment	NA	67	A1469	B506	C142	132	0	0	0	0	-	0	NA	NA	NA	-	9.5	9.5	9.2	9.1	9	9.7	8.9	9.8	9.5	10.1	9.6	9.3	10.2	11.2	9.8	9.4	10.2	9.7	10.7	11.3	9.6	9.6	9.7	9.7
THC0290_0516	632797	633999	1	CDS	NA		THC0290_v2_0541		Transposase IS256 family	NA	2775	A331	B122	C33	1203	0	0	0	0	-	NA	NA	NA	NA	-	11.5	11.4	11.2	11	10.3	10.5	9.9	10.5	10.1	10	11.4	11.4	10.5	10.5	10.2	10.1	10.3	10.5	10.6	11.7	11.6	11.6	11.3	11.2
THC0290_N_0372	633986	634186	-1	Region	repeated_region				new transcription segment	NA	1531	A1765	B546	C143	201	0	0	0	0	-	0	NA	NA	NA	-	7.6	7.5	7.6	7.7	8.3	8.5	9.4	11.5	11.3	11.1	7.8	7.7	11.4	11.9	10.7	10.8	11.1	11.1	11.7	11.4	7.5	7.8	7.5	7.4
THC0290_0517	634225	634386	-1	CDS	NA		NA		Hypothetical protein	NA	1532	A1765	B546	C143	162	0	0	0	0	-	NA	NA	NA	NA	-	7.3	7.2	7.4	7.5	8.4	9	9.7	12.6	11.8	11.7	7.8	7.7	12.3	12.4	11.5	11.4	11.6	11.7	12.2	11.2	7.1	7.8	6.8	7.1
THC0290_N_0373	634387	634452	-1	Region	intra				new transcription segment	NA(CDS:THC0290_0517);NA(CDS:THC0290_0518)	1529	A1765	B546	C143	66	0	0	0	0	-	0	NA	NA	NA	-	9.9	10.2	10.3	10.8	11.9	11.5	12.6	14.9	14.6	14.1	10.7	10.6	15	14.9	14.2	14	14.4	13.9	14.4	14.3	10.1	10.3	9.9	10.2
THC0290_0518	634453	634626	-1	CDS	NA		THC0290_v2_0542		Conserved protein of unknown function	NA	1530	A1765	B546	C143	174	0	0	0	0	-	NA	NA	NA	NA	-	9.7	10	9.9	10.3	11.4	11.2	12.1	13.6	14	13.7	10.3	10.1	14.1	14.5	13.7	13.4	14	13.9	14	14	9.9	10.1	9.6	10
THC0290_N_0374	634627	634806	-1	Region	intra				new transcription segment	NA(CDS:THC0290_0518);NA(CDS:THC0290_0519)	1528	A1765	B546	C143	180	1	1	0	0	THC0290_N_0375	0	NA	NA	NA	-	8.6	8.6	8.7	9.4	10.2	10.3	11.1	13.1	13.2	13.1	9.3	9	14.4	14.4	13.5	13.2	13.7	13.3	13.9	13.5	8.7	8.8	8.3	8.5
THC0290_N_0375	634732	634818	1	Region	repeated_region				new transcription segment	NA	281	A1837	B563	C145	87	1	1	0	0	THC0290_N_0374	0	NA	NA	NA	-	4.5	4.2	4.1	4.3	4	4.7	4.2	7.7	3.9	6.6	4.1	4	7.9	5.5	4.2	3.9	6.2	6.5	5.7	4	5.1	4.5	4.4	5
THC0290_0519	634807	635154	-1	CDS	NA		THC0290_v2_0543		Conserved protein of unknown function	NA	1520	A1765	B546	C143	348	0	0	0	0	-	NA	NA	NA	NA	-	10.6	10.6	10.3	10.6	11.1	11.3	11.2	12.1	12.3	12.2	10.5	10.6	12.5	12.8	11.8	11.7	13	12.6	11.7	12.2	10.6	10.7	10.4	10.3
THC0290_0520	635151	635951	-1	CDS	NA		THC0290_v2_0544		Probable transcriptional regulator	NA	1521	A1765	B546	C143	801	0	0	0	0	-	NA	NA	NA	NA	-	10.4	10.5	10.2	10.3	10.8	10.8	11	11.9	12.1	11.8	10.4	10.5	12.5	12.8	11.7	11.7	13.4	13.6	12.8	13.3	10.2	10.4	10.2	10.1
THC0290_0521	637705	637932	-1	CDS	NA		THC0290_v2_0545		Protein of unknown function	NA	2082	A1233	B419	C125	228	0	0	0	0	-	NA	NA	NA	NA	-	4	4	4.3	3.9	3.9	3.9	4.7	4	4	3.9	3.9	4	4	5.1	4.1	3.9	6.8	4	7.4	7.6	4.5	3.9	4	4
THC0290_0522	637937	638200	-1	CDS	NA		THC0290_v2_0546		Hypothetical protein	NA	563	A1534	B521	C143	264	0	0	0	0	-	NA	NA	NA	NA	-	4	4.1	4	4.1	4.1	4	4.3	3.9	4	3.9	3.9	4	4.5	4.5	4	4	6.7	4	5	7.9	4.2	3.9	4	4
THC0290_0523	638334	638645	1	CDS	NA		THC0290_v2_0547		Transposase IS3 family, OrfA	NA	1266	A1768	B546	C143	312	0	0	0	0	-	NA	NA	NA	NA	-	10.3	10.4	10.1	10.1	10.5	10.5	10.5	10.8	11.2	11.2	10.4	10.4	11.5	11.9	11.3	11.4	12	11.8	11.6	12.2	10.4	10.8	10.2	10.3
THC0290_0524	638696	639541	1	CDS	NA		THC0290_v2_0548		Transposase IS3 family, OrfB	NA	1262	A1768	B546	C143	846	0	0	0	0	-	NA	NA	NA	NA	-	10	10	9.8	9.6	10	9.8	10.2	10.8	10.8	10.7	9.9	9.9	11	11.2	10.9	11	11.2	11.1	11.4	11.6	10.2	10.4	10	10.1
THC0290_N_0376	640464	640566	-1	Region	3prime				new transcription segment	NA(CDS:THC0290_0525)	1675	A1765	B546	C143	103	0	0	0	0	-	0	NA	NA	NA	-	11.2	11.1	11.4	11.4	12.3	12.4	12.3	13.2	13.2	13.6	11.6	11.6	13.7	13.4	12.9	13	12.8	13.1	12.7	12.7	11	11.3	10.8	10.7
THC0290_0525	640567	641241	-1	CDS	NA		THC0290_v2_0551		Hypothetical protein	NA	1782	A1765	B546	C143	675	0	0	0	0	-	NA	NA	NA	NA	-	10.7	10.8	11.5	11.7	12.3	12.2	12.3	12.6	12.5	12.3	11.5	11.9	13.1	13.2	13.1	13	12.7	12.6	13.2	13.1	10.6	10.7	10.5	9.9
THC0290_N_0377	641242	642097	-1	Region	repeated_region				new transcription segment	NA	1849	A1252	B419	C125	856	0	0	0	0	-	0	NA	NA	NA	-	9.7	9.6	9.2	9.3	9.6	10.3	9.7	10.1	10.2	10.6	9.5	9.5	11.9	11.4	11	10.6	10.6	11	11.1	11.7	10	9.9	10.1	10.1
THC0290_0526	642217	643776	1	CDS	NA		THC0290_v2_0553		Transposase IS1182 family	NA	1584	A1765	B546	C143	1560	0	0	0	0	-	NA	NA	NA	NA	-	6.8	6.8	7.1	7.2	7.9	8	8.9	9.3	10.6	10.3	7.2	7.2	12.2	12.5	11	10.4	12.3	12.3	11	12.4	6.9	7	7.4	7.1
THC0290_0527	643868	645070	1	CDS	NA		THC0290_v2_0554		Transposase IS256 family	NA	2777	A331	B122	C33	1203	0	0	0	0	-	NA	NA	NA	NA	-	11.5	11.6	11.4	11.1	10.4	10.5	10	10.5	10.1	10.1	11.5	11.6	10.5	10.5	10.4	10.2	10.5	10.4	10.9	11.6	11.6	11.7	11.4	11.3
THC0290_N_0378	645071	645304	1	Region	repeated_region				new transcription segment	NA	1055	A1686	B545	C143	234	1	1	0	0	THC0290_N_0379	0	NA	NA	NA	-	7.5	7.2	7.5	7.4	7.6	8.1	7.7	9	8.4	8.9	7.5	7.4	9.5	8.9	7.6	6.7	8.6	8.8	9.4	8.2	7.4	7.4	7.1	7.3
THC0290_N_0379	645195	645300	-1	Region	repeated_region				new transcription segment	NA	1670	A1765	B546	C143	106	1	1	0	0	THC0290_N_0378	0	NA	NA	NA	-	9.8	9.5	9.7	10	10.5	10.6	10.6	11.6	11.3	11.5	9.9	10	11.8	11.9	11.4	11.4	11.4	11.4	11.6	12.2	9.7	9.8	9.5	9.5
THC0290_0528	645301	645954	-1	CDS	NA		THC0290_v2_0555		Probable phosphatase/phosphohexomutase	NA	95	A1203	B413	C124	654	0	0	0	0	-	NA	NA	NA	NA	-	8.5	8.3	7.9	7.9	8.1	8	8.4	8.2	8.5	8.5	8.1	8.3	8.4	8.9	8.9	8.9	9.5	8.6	6.5	10	8.4	8.6	8.6	8.7
THC0290_N_0380	645955	646130	-1	Region	intra				new transcription segment	NA(CDS:THC0290_0528);NA(CDS:THC0290_0529)	96	A1203	B413	C124	176	0	0	0	0	-	0	NA	NA	NA	-	8.8	8.8	8.3	8.3	8.7	8.6	9	8.7	9	9	8.4	8.6	9.2	9.6	9.3	9.2	9.5	9.1	9	9.5	9	8.9	9	9.2
THC0290_0529	646131	646511	-1	CDS	NA		THC0290_v2_0556		Hypothetical protein	NA	4251	A669	B187	C46	381	0	0	0	0	-	NA	NA	NA	NA	-	9.4	9.4	9.1	8.8	9.1	9.1	9.4	8.4	8.1	8.8	9.3	9.4	9.1	8.6	9.5	9.4	8.7	8.3	8.7	7.8	9.5	9.5	9.6	9.5
THC0290_N_0381	646512	647059	-1	Region	repeated_region				new transcription segment	NA	1554	A1765	B546	C143	548	0	0	0	0	-	0	NA	NA	NA	-	10.4	10.3	10.3	10.6	10.9	11.1	11.5	10.8	12.2	12.1	10.6	10.6	12.1	12.2	12	11.8	11.6	11.7	12.4	12	10.6	10.5	10.6	10.7
THC0290_0530	647060	648847	-1	CDS	NA		THC0290_v2_0557		Probable S41 family peptidase precursor	NA	4252	A669	B187	C46	1788	0	0	0	0	-	NA	NA	NA	NA	-	10.5	10.7	10.6	10.5	10.8	10.8	11.1	11.2	9.5	10.5	10.7	10.8	10.4	10.2	10.6	10.8	9.9	10.1	10.1	10.1	10.7	10.9	10.9	10.9
THC0290_N_0382	648848	649035	-1	Region	intra				new transcription segment	NA(CDS:THC0290_0530);NA(CDS:THC0290_0531)	4332	A1182	B405	C122	188	0	0	0	0	-	0	NA	NA	NA	-	10	10.2	9.6	9.8	10.4	9.8	10.7	11.3	9.7	10.7	9.9	10.4	10.2	10.4	10.2	10.5	9.4	9.8	9.2	10.3	9.8	10.1	10.1	10.1
THC0290_0531	649036	649524	-1	CDS	NA		THC0290_v2_0558		Protein of unknown function	NA	523	A1400	B480	C139	489	0	0	0	0	-	NA	NA	NA	NA	-	10.6	10.9	10.7	10.6	11.2	11.2	11.3	11.7	10.8	11.9	10.7	11.1	11.6	11.8	11.4	11.5	11.5	11.4	12.4	11.9	10.9	11	11	10.9
THC0290_0532	649528	650709	-1	CDS	NA		THC0290_v2_0559		Probable plasmid maintenance system antidote protein	NA	1197	A1731	B546	C143	1182	0	0	0	0	-	NA	NA	NA	NA	-	10.1	10.2	9.6	9.5	9.7	10	9.9	11.1	10.5	10.7	10	10.1	11.3	11.3	10.7	10.8	11.3	11.1	12.3	12.8	10.1	10.3	10	10.1
THC0290_N_0383	650730	650946	-1	Region	intra				new transcription segment	NA(CDS:THC0290_0532);NA(CDS:THC0290_0533)	1552	A1765	B546	C143	217	0	0	0	0	-	0	NA	NA	NA	-	10.8	10.7	10.8	10.7	11.3	11.9	12	12.1	12.4	12.4	10.9	10.9	12.9	12.6	12.5	12.1	11.8	12.2	12.3	11.9	11.1	10.9	11	11
THC0290_0533	650947	651456	-1	CDS	NA		THC0290_v2_0560		Hypothetical protein	NA	4286	A1170	B402	C122	510	0	0	0	0	-	NA	NA	NA	NA	-	11.2	11.4	11.3	11.4	11.6	11.3	11.5	11.1	10.9	11	11.4	11.6	11.7	11.9	12	11.7	11.3	11.2	11	10.9	11.3	11.3	11.3	11.2
THC0290_0534	651449	651640	-1	CDS	NA		THC0290_v2_0561		Hypothetical protein	NA	4287	A1170	B402	C122	192	0	0	0	0	-	NA	NA	NA	NA	-	11	11.2	11.4	11.3	11.5	11.2	11.3	11.2	11.1	11.2	11.3	11.5	11.9	12.1	12	11.8	11.2	11.1	10.8	10.4	11.2	11.1	11.2	11
THC0290_N_0384	651641	651988	-1	Region	repeated_region				new transcription segment	NA	1555	A1765	B546	C143	348	0	0	0	0	-	0	NA	NA	NA	-	9.9	9.9	10.2	10.5	10.8	11.3	11.6	11.1	12.4	12.3	10.6	10.2	12.9	12.6	12.5	11.7	12.3	12.2	12.7	11.9	10.5	10.2	10.3	10.4
THC0290_0535	651989	652948	-1	CDS	NA		THC0290_v2_0562		Protein of unknown function	NA	2056	A1632	B540	C143	960	0	0	0	0	-	NA	NA	NA	NA	-	11.3	11.4	11.5	11.4	11.8	11.7	11.5	12.2	11.8	12	11.6	11.8	12.4	12.6	12.4	12.5	12.2	12	11.9	12.3	11.1	11.3	11.5	11
THC0290_0536	652945	653490	-1	CDS	NA		THC0290_v2_0563		Hypothetical transmembrane protein	NA	2066	A1632	B540	C143	546	0	0	0	0	-	NA	NA	NA	NA	-	10.8	10.6	10.7	10.5	10.5	10.7	10.8	11.1	11	11	10.9	11	12.3	12.2	11.8	11.7	11.9	12	11.7	11.4	10.7	10.6	10.8	10.7
THC0290_N_0385	653491	653740	-1	Region	repeated_region				new transcription segment	NA	1558	A1765	B546	C143	250	0	0	0	0	-	0	NA	NA	NA	-	10.4	10.1	10.6	10.7	11.3	12.1	12	11.1	12.5	12.5	11	10.8	13.3	12.7	12.5	11.9	12.5	12.6	13	12.7	10.4	10.2	10.3	10.5
THC0290_N_0386	653742	653834	-1	Region	repeated_region				new transcription segment	NA	2065	A1765	B546	C143	93	0	0	0	0	-	0	NA	NA	NA	-	10.5	10.5	10.6	10.5	11	11.4	11.3	12	11.5	11.5	10.8	10.8	12.2	12.3	11.9	11.7	12.2	11.6	11.7	12.9	10.5	10.2	10.8	10.6
THC0290_0537	653835	655004	-1	CDS	NA		THC0290_v2_0564		Protein of unknown function	NA	343	A1630	B540	C143	1170	0	0	0	0	-	NA	NA	NA	NA	-	11.3	11.4	11.7	11.6	12	11.9	11.7	12.7	11.1	11.7	11.9	11.9	12.5	13	12.5	12.3	12.1	12.2	11.7	11.5	11.2	11.4	11.7	11.4
THC0290_N_0387	655005	655084	-1	Region	5prime				new transcription segment	NA(CDS:THC0290_0537)	1680	A1765	B546	C143	80	0	0	0	0	-	0	NA	NA	NA	-	11.9	12.1	12.3	12.3	12.7	12.7	12.6	13.8	12.8	13	12.3	12.4	14.1	13.9	13.3	13	13.4	14.2	14.4	14	11.9	12	12.3	12.2
THC0290_0538	655176	655784	-1	CDS	NA		THC0290_v2_0565		Protein of unknown function	NA	1560	A1746	B546	C143	609	0	0	0	0	-	NA	NA	NA	NA	-	11.5	11.6	11.9	11.9	12.1	12	12.1	11.9	12.3	12.8	11.9	12.3	13.7	13.7	13.3	13.1	13.1	13.3	14.1	14.2	11.4	11.5	11.7	11.3
THC0290_N_0388	655785	656570	-1	Region	repeated_region				new transcription segment	NA	1848	A1252	B419	C125	786	0	0	0	0	-	0	NA	NA	NA	-	9.4	9.1	8.7	9	8.7	9.4	9.2	9.3	9.5	9.7	9.1	9	10.8	10.7	10	9.7	9.9	10	10.3	10.4	9.6	9.3	9.7	10
THC0290_0539	656571	656978	-1	CDS	NA		THC0290_v2_0567		Hypothetical protein	NA	977	A1675	B543	C143	408	0	0	0	0	-	NA	NA	NA	NA	-	10.4	10.7	10.9	10.8	11.3	11.1	10.9	12.6	11.7	11.3	10.8	11	11.4	12.2	11.3	11.1	11.9	11.5	11.3	11.4	10.5	11.1	10.6	10.5
THC0290_0540	656981	657529	-1	CDS	NA		THC0290_v2_0568		Hypothetical protein	NA	1377	A1760	B546	C143	549	0	0	0	0	-	NA	NA	NA	NA	-	10.8	11.1	11.2	11.5	12.2	12.3	11.7	13.2	12.3	12.4	11.4	11.5	12.7	12.8	12.1	12.1	12.6	12.6	12.7	12.4	10.8	11.3	10.9	10.9
THC0290_0541	657526	658596	-1	CDS	NA		THC0290_v2_0569		Probable transmembrane protein of unknown function	NA	1942	A1754	B546	C143	1071	0	0	0	0	-	NA	NA	NA	NA	-	8.6	8.6	8.6	8.5	8.6	8.4	8.2	9.4	8.5	8.8	8.6	8.9	9.5	9.6	9.3	9.4	9.1	9.4	9.3	10	8.4	8.8	8.5	8.4
THC0290_N_0389	658597	659019	-1	Region	indep	Rfp29			new transcription segment	NA	1043	A1759	B546	C143	423	1	1	0	0	THC0290_N_0390	1	658751,658927,-	1	177	MKVYVNGYGLRPFRIEETIENPTQYKGSFELPKGVERADGEKWIKLDYYFTEKELIAK	9.4	9.5	10	9.8	10.1	10.5	9.6	10.2	10.4	10.7	10.2	10.2	11.3	11	10.4	10.5	11.2	11.7	11.6	11	9.4	9.9	9.6	9.6
THC0290_N_0390	658610	658815	1	Region	indep	Rfp30			new transcription segment	NA	1762	A1762	B546	C143	206	1	1	0	0	THC0290_N_0389	1	658627,658758,+	0.984	132	MAKEVKYKTVTLYRSAITGRTVTEEYAKKNPKTTVKEVTKVPI	8.1	8	9.3	9.4	10.2	11.4	10.4	12.4	12.1	12.2	9.3	9.1	12.6	12.6	10.6	10.6	12.5	13.4	13.1	13.2	7.7	8.2	8.3	7.8
THC0290_N_0391	659021	659380	-1	Region	intra				new transcription segment	NA(Region:THC0290_N_0389);NA(CDS:THC0290_0542)	1046	A1759	B546	C143	360	0	0	0	0	-	1	659124,659378,-	1	255	MITINKNVEYLKVDGAKIVDLNDSINEIFTELLLRIELRIEPYIFSHSAEINITGNTKEYSFSIIAEDDETAELLEKIIDEETN	9	9	9.2	9.3	9.6	9.5	9	10	9.6	9.8	9.3	9.5	10.2	10.4	9.9	10	10	9.8	10.6	10.7	8.9	9.1	9.1	9
THC0290_0542	659381	659842	-1	CDS	NA		THC0290_v2_0573		Hypothetical protein	NA	1047	A1759	B546	C143	462	0	0	0	0	-	NA	NA	NA	NA	-	8.8	8.8	8.7	8.8	8.9	9.1	8.4	9.4	8.8	9.1	8.8	9.1	10	10.1	9.8	9.6	9.6	9.9	10.3	10.5	8.6	8.6	9	8.8
THC0290_N_0392	659843	659917	-1	Region	5prime				new transcription segment	NA(CDS:THC0290_0542)	1044	A1759	B546	C143	75	0	0	0	0	-	0	NA	NA	NA	-	10.8	11.1	11.3	11.2	10.8	11.6	10.8	11.7	11.2	11.8	11.5	11.4	12.4	11.9	11.7	11.7	12.1	12.4	12.8	12.4	11	11.4	11.2	11.4
THC0290_0543	660017	661417	-1	CDS	NA		THC0290_v2_0574		Hypothetical protein	NA	1847	A1252	B419	C125	1401	0	0	0	0	-	NA	NA	NA	NA	-	7.8	7.8	7.2	7.5	7.4	7.4	7.9	8.1	9.6	9.7	7.4	7.3	10.6	10.9	10.6	10.5	10.6	10.6	10.5	10.5	8	7.9	8.6	8.7
THC0290_N_0393	661643	662054	-1	Region	repeated_region				new transcription segment	NA	1067	A1766	B546	C143	412	1	1	0	0	THC0290_N_0394	0	NA	NA	NA	-	10.4	10.8	10.5	10.7	11.7	11.9	11.9	13.7	13.6	13.6	10.3	10.4	13.2	13.6	12.5	12.4	13	13	12.8	12.5	11.3	11.3	10.8	11
THC0290_N_0394	661670	662043	1	Region	repeated_region				new transcription segment	NA	1575	A1749	B546	C143	374	1	1	0	0	THC0290_N_0393	0	NA	NA	NA	-	6.6	6.4	6.6	6.5	7.1	7.4	7.1	8.3	8.6	9.6	6.9	7	12.9	12.6	11.9	10.9	12.6	12.5	11.8	11.6	6.1	6.8	5	6
THC0290_0544	662247	663131	1	CDS	NA		THC0290_v2_0576		Transposase IS982 family	NA	1282	A1747	B546	C143	885	0	0	0	0	-	NA	NA	NA	NA	-	11.4	11.2	11.4	11.6	11.5	11.2	11.1	11.9	11.7	11.8	11.6	11.6	13.6	14.1	13	12.7	14.1	13.9	14.1	14.6	11.3	11.1	11.1	11
THC0290_0545	663927	664523	-1	CDS	NA		THC0290_v2_0579		Hypothetical protein	NA	2014	A1739	B546	C143	597	0	0	0	0	-	NA	NA	NA	NA	-	5.1	4.9	4	4.4	4.4	4.2	4.1	4.2	6.2	4.3	4	4.2	5.7	6.1	4.9	4.9	7.7	6.9	6	9.1	4.9	4.7	5.5	5.1
THC0290_0546	664709	665848	-1	CDS	NA		THC0290_v2_0580		Restriction endonuclease	NA	1841	A1253	B419	C125	1140	0	0	0	0	-	NA	NA	NA	NA	-	5.5	5.5	4.5	4.6	4.7	4.5	5.2	5	5.6	5.4	4.8	4.6	6.1	8.3	5.4	5.7	7.4	5.8	4.5	9	5.1	5.5	5.7	6.2
THC0290_0547	665845	666240	-1	gene	NA		THC0290_v2_0581		Truncated cytosine-specific modification methyltransferase, C-terminal region	NA	1854	A1731	B546	C143	396	0	0	0	0	-	NA	NA	NA	NA	-	6.5	6.1	5.3	5.7	5.9	5.9	6.4	6.8	6.1	6.8	5.2	5.5	8.2	8.7	7.6	6.8	8.4	7.7	7.9	8.2	6.5	6.4	6.3	6.8
THC0290_N_0395	666241	666640	-1	Region	repeated_region				new transcription segment	NA	1210	A1768	B546	C143	400	0	0	0	0	-	0	NA	NA	NA	-	8.3	8.1	7.7	7.8	8.6	8.1	8.4	9.4	9.2	8.9	7.9	8.1	9.3	10.3	9.1	8.9	9.8	9.3	10.2	10	8.2	8.3	8	7.9
THC0290_flavo-1_0028	666296	666377	-1	misc_RNA	NA				Flavo-1 RNA	NA	1351	A1747	B546	C143	82	0	0	0	0	-	NA	NA	NA	NA	-	6.8	6.8	6.4	7	7.3	6.9	7	8.1	9.6	8.4	6.6	6.7	8.5	10.5	9.2	8.4	11.6	9.7	10.9	12.3	7.2	6.7	6.8	6.8
THC0290_0548	666641	667414	-1	CDS	NA		THC0290_v2_0583		Protein of unknown function	NA	75	A1303	B443	C129	774	0	0	0	0	-	NA	NA	NA	NA	-	10	10.3	9.8	9.8	10	10.2	10.4	11.6	9.6	10.5	9.9	10	10.8	11.2	10.3	10.1	10.8	10.7	10.7	10.8	10.1	10.3	9.8	9.7
THC0290_0549	667418	668239	-1	gene	NA		THC0290_v2_0584		Truncated cytosine-specific modification methyltransferase, N-terminal region	NA	1502	A1768	B546	C143	822	0	0	0	0	-	NA	NA	NA	NA	-	10.5	10.7	10	10.1	10.5	10.8	10.8	12.1	11.6	11.6	10.4	10.5	12	12.2	11.5	11.4	12.3	12.3	12	11.8	10.4	10.7	10	10.1
THC0290_N_0396	668261	668748	-1	Region	intra				new transcription segment	NA(gene:THC0290_0549);NA(CDS:THC0290_0550)	1595	A1765	B546	C143	488	0	0	0	0	-	1	668460,668747,-	1	288	MTERINIFWMELDRQCNDHNCSEFEYYSEMWGVWWMPWFIEVNSKSLNFSANDISNNDLNLLVEKGKIEIIKIYDKLEMNEEFDRIRYRIIKNHS	6.5	6.6	6.7	7	8	8.4	8.7	10	10.8	10.6	6.7	7	11	11.1	10.5	10.3	10.4	10.6	10.4	9.7	6.2	6.2	6.4	6.3
THC0290_0550	668749	669369	-1	CDS	NA		THC0290_v2_0586		Protein of unknown function	NA	1593	A1765	B546	C143	621	0	0	0	0	-	NA	NA	NA	NA	-	8.6	8.7	9.1	9.3	9.9	10.2	10.4	10.1	11.6	11.6	9.3	9.4	12.5	12.5	12	11.7	12.2	12.1	11.8	11.8	8.9	8.4	8.9	8.6
THC0290_N_0397	669370	670142	-1	Region	repeated_region				new transcription segment	NA	1574	A1765	B546	C143	773	0	0	0	0	-	0	NA	NA	NA	-	8.1	7.9	8	8.1	8.6	9.1	9.3	9.7	9.8	10.2	8.3	8.2	11.6	11.5	10.5	10	10.9	11.1	11.2	11.8	8.2	8.2	8.1	8.5
THC0290_0551	670143	673139	-1	CDS	NA		THC0290_v2_0587		Putative DNA or RNA helicase	NA	1859	A1211	B415	C124	2997	0	0	0	0	-	NA	NA	NA	NA	-	8.2	8.4	8.4	8.3	8.7	8.1	8.9	8.6	9.7	9.6	8.7	8.8	9.4	10.8	10.4	10	10.4	9.7	9.8	9.8	8.4	8	8.3	8.4
THC0290_N_0398	673140	674020	-1	Region	5prime				new transcription segment	NA(CDS:THC0290_0551)	1594	A1765	B546	C143	881	1	0	1	0	THC0290_0552	1	673538,673807,-	1	270	MEELEQKLKLTFEKHKKGYASICEPISGLISRQNNALKFGAVNEKYVDEILEILNTHIENKSDSEKENSIEISKDYINLFQKLVINPFS	9	8.9	9.2	9.1	10	10.1	10.4	10.1	11.7	11.6	9.4	9.5	12.7	12.6	12.1	11.8	11.6	12	12.5	12.2	8.7	8.7	9	8.9
THC0290_0552	673195	673554	1	CDS	NA		NA		Hypothetical protein	NA	1974	A1692	B546	C143	360	1	1	0	0	THC0290_N_0398	NA	NA	NA	NA	-	3.9	3.9	3.9	4.1	4.2	4	4	8.3	4	4.9	4	4	6.4	3.9	3.9	4.1	8.2	3.9	5.8	7.3	4.1	3.9	3.9	3.9
THC0290_0553	674578	675384	-1	CDS	NA		THC0290_v2_0590		Hypothetical protein	NA	809	A1480	B507	C142	807	0	0	0	0	-	NA	NA	NA	NA	-	8.3	8.3	7.8	7.8	7.5	7.7	7.1	7	9	9	8.2	8.1	10.1	10.3	9.4	9.2	9.6	9.5	8.7	8.9	8.4	8.1	8.4	8.2
THC0290_N_0399	675385	675715	-1	Region	repeated_region				new transcription segment	NA	1556	A1765	B546	C143	331	0	0	0	0	-	0	NA	NA	NA	-	9.9	9.8	10.2	10.4	10.7	11.2	11.4	11.2	11.8	12.3	10.5	10.2	12.9	12.6	11.8	11.6	12.1	12.2	12.7	12	10.4	10.1	10.2	10.3
THC0290_0554	675716	676768	-1	CDS	NA		THC0290_v2_0592		Hypothetical protein precursor	NA	804	A852	B256	C70	1053	0	0	0	0	-	NA	NA	NA	NA	-	8.4	8.3	7.7	7.5	7.5	7.2	6.9	7.3	7.2	8	7.9	8	9	9.6	8.8	8.3	9.6	9.1	9.7	10.7	8.4	8.4	8.5	8.4
THC0290_N_0400	676790	676957	-1	Region	repeated_region				new transcription segment	NA	138	A850	B256	C70	168	0	0	0	0	-	0	NA	NA	NA	-	8.6	8.5	7.8	7.8	7.4	7.6	7.9	7.9	6.5	8.2	7.8	8	9.5	8.6	8.6	7.8	9.6	8.5	8.8	10.2	8.8	8.6	8.5	9.1
THC0290_0555	676958	678358	-1	CDS	NA		THC0290_v2_0593		Probable type II restriction endonuclease Sau3AI	NA	373	A393	B150	C42	1401	0	0	0	0	-	NA	NA	NA	NA	-	8.8	8.7	8.2	8.1	8.2	8	8.5	9.1	7.7	8.4	8.3	8.2	7.3	8.2	7.7	7.8	7.1	7.9	7.8	8.1	8.9	8.6	9	8.9
THC0290_0556	678342	679628	-1	CDS	NA		THC0290_v2_0594		Probable type II modification methyltransferase Sau3AI	NA	639	A1356	B468	C136	1287	0	0	0	0	-	NA	NA	NA	NA	-	9.8	9.5	8.7	8.8	8.9	8.8	9.2	9.8	9.2	9.9	9	9.1	9.7	10.2	9.6	9.6	8.8	9	9.3	10.1	9.4	9.3	9.6	9.6
THC0290_0557	679618	679926	-1	CDS	NA		THC0290_v2_0595		Putative DNA binding protein	NA	640	A1356	B468	C136	309	0	0	0	0	-	NA	NA	NA	NA	-	9.8	9.6	8.9	8.8	9	9	9.1	9.8	9.6	10.5	9.1	9.1	10.5	10.6	9.9	9.8	10.2	10.5	10.7	11.4	9.6	9.4	9.8	9.6
THC0290_N_0401	679945	680245	-1	Region	repeated_region				new transcription segment	NA	1557	A1765	B546	C143	301	0	0	0	0	-	0	NA	NA	NA	-	9.9	9.8	10.2	10.4	10.7	11.4	11.5	10.6	11.9	12.3	10.5	10.3	12.9	12.5	12.2	11.7	11.9	12.1	12.7	12.2	10.3	10.1	10.2	10.2
THC0290_0558	680341	681156	-1	CDS	NA		THC0290_v2_0596		Protein of unknown function	NA	677	A1370	B470	C136	816	0	0	0	0	-	NA	NA	NA	NA	-	8.3	8.4	8.5	8.6	8.6	8.7	8.2	8.9	9	9	8.8	8.9	9.5	9.8	9.4	9.3	8.5	8.9	7.6	8.3	8.3	8.3	8.5	8.1
THC0290_N_0402	681157	681235	-1	Region	repeated_region				new transcription segment	NA	1045	A1759	B546	C143	79	0	0	0	0	-	0	NA	NA	NA	-	8.8	8.9	9.2	8.9	9.1	9.3	9.2	9.4	9.5	9.7	9.3	9.4	10.8	10.9	10.3	10	10.6	10.4	11.3	11.4	8.9	9	9	9
THC0290_N_0403	681237	681325	-1	Region	intra				new transcription segment	NA(CDS:THC0290_0558);NA(CDS:THC0290_0559)	204	A168	B62	C19	89	0	0	0	0	-	0	NA	NA	NA	-	7.3	7.1	6.9	7.1	7.3	7.4	7.4	8.5	8.1	7.7	7.2	7.4	8.9	9.1	8.9	8.8	5.5	6.6	3.9	3.9	7	6.9	7.2	7.1
THC0290_0559	681326	681646	-1	CDS	NA		THC0290_v2_0597		Protein of unknown function	NA	1856	A1210	B415	C124	321	0	0	0	0	-	NA	NA	NA	NA	-	8	8.4	8.4	8.5	9	8.8	8.7	9.5	9.4	9.7	8.5	8.8	10.4	10.2	10.2	10	9.2	9.2	9.3	9.3	8.3	8.3	8.5	8.4
THC0290_0560	681664	682242	-1	CDS	NA		THC0290_v2_0598		Protein of unknown function	NA	1857	A1210	B415	C124	579	0	0	0	0	-	NA	NA	NA	NA	-	7.9	7.9	7.8	7.8	8.3	8.2	8.3	9.9	9.3	9.6	8.1	8.2	10.1	10.4	10	9.9	8.1	8.5	8.1	7.9	7.7	8	8.1	7.9
THC0290_0561	682255	683376	-1	CDS	NA		THC0290_v2_0599		Hypothetical protein	NA	1587	A1765	B546	C143	1122	0	0	0	0	-	NA	NA	NA	NA	-	7.9	8	7.9	8	8.4	8.7	8.7	9.9	9.9	10.5	8.2	8.2	11	11.3	10.6	10.5	9.8	10.2	10.5	11.1	7.8	8	8.3	8.1
THC0290_N_0404	683377	684734	-1	Region	repeated_region				new transcription segment	NA	1850	A1252	B419	C125	1358	0	0	0	0	-	0	NA	NA	NA	-	9.6	9.4	9.3	9.3	9.8	10.1	10.6	9.6	10.9	11	9.5	9.4	12.1	11.7	11.2	10.7	10.7	10.8	11.2	11.6	9.8	9.9	9.7	9.9
THC0290_0562	684806	685303	-1	CDS	NA		THC0290_v2_0600		Protein of unknown function	NA	2655	A49	B27	C13	498	0	0	0	0	-	NA	NA	NA	NA	-	8.9	9	8.8	8.8	8.3	8.1	7.3	8.1	6.8	7.8	8.9	9.1	7.5	8	8.2	7.8	8.1	7.4	9.2	9.9	9.1	9	9.1	9
THC0290_0563	685304	686401	-1	CDS	NA		THC0290_v2_0601		Protein of unknown function	NA	2661	A55	B29	C13	1098	0	0	0	0	-	NA	NA	NA	NA	-	9.8	9.8	9.4	9.4	8.9	8.8	8.1	9.2	7.8	8.6	9.7	9.7	8.6	8.9	8.5	8.3	8.7	8.5	5.9	9.5	9.8	9.8	10.1	9.8
THC0290_N_0405	686402	686639	-1	Region	intra				new transcription segment	NA(CDS:THC0290_0563);NA(CDS:THC0290_0564)	2660	A54	B29	C13	238	0	0	0	0	-	0	NA	NA	NA	-	8.2	8.3	7.6	7.6	7.1	7.1	6.5	7.5	7.4	7	8	7.9	6.5	5.4	6.6	6.5	8	6.2	5.1	8.4	8	8.1	8.2	8.4
THC0290_0564	686640	687575	-1	CDS	NA		THC0290_v2_0602		Hypothetical protein	NA	2662	A55	B29	C13	936	0	0	0	0	-	NA	NA	NA	NA	-	8.8	8.9	8.4	8.4	8.1	7.7	7.7	8.2	8.3	7.9	8.6	8.6	8.2	8.3	7.9	8	7.8	7.7	3.9	9.1	8.7	8.8	9.1	8.9
THC0290_N_0406	687576	687677	-1	Region	5prime				new transcription segment	NA(CDS:THC0290_0564)	3882	A1484	B508	C142	102	1	1	0	0	THC0290_N_0407	0	NA	NA	NA	-	9.6	9.4	9.3	8.9	8.6	9.4	8.9	9.1	9.4	10	9.7	9.4	10.5	9.9	9.4	9.3	9.7	10.3	10.9	9.9	9.6	9.8	9.8	10
THC0290_N_0407	687604	688071	1	Region	repeated_region				new transcription segment	NA	1495	A1768	B546	C143	468	2	1	1	0	THC0290_0565;THC0290_N_0406	0	NA	NA	NA	-	4.1	4	4.8	4.2	5.7	6.4	6.7	8.4	8.5	8.5	4.8	4.5	9.8	8.8	7.7	6.7	8.5	8.8	10	7.8	4.1	4.8	4	3.9
THC0290_0565	687769	689262	-1	CDS	NA		THC0290_v2_0603		Protein of unknown function, putative reverse transcriptase (RNA-dependent DNA polymerase)	NA	2283	A795	B242	C67	1494	1	1	0	0	THC0290_N_0407	NA	NA	NA	NA	-	7.9	8	7.5	7.4	7.3	7.2	7.3	8	6.8	7.6	7.6	7.6	8.6	8.2	8.1	8.1	7.3	7	7.8	7.1	8	7.9	7.8	8.1
THC0290_N_0408	689263	689589	-1	Region	repeated_region				new transcription segment	NA	1559	A1765	B546	C143	327	0	0	0	0	-	0	NA	NA	NA	-	10.3	10.2	10.4	10.7	11	11.6	11.6	11.5	12.4	12.3	11	10.7	12.9	12.6	12	11.7	12.1	12.2	12.7	12.5	10.7	10.7	10.6	10.8
THC0290_0566	689590	690501	-1	CDS	NA		THC0290_v2_0605		Hypothetical transmembrane protein	NA	2238	A972	B307	C84	912	0	0	0	0	-	NA	NA	NA	NA	-	8.7	8.6	8.1	8.1	8	8.2	8.8	8.6	9.9	9.9	8.2	8.1	9.3	9.3	10	9.8	9.2	9.3	9.5	9.5	8.7	8.9	8.7	9
THC0290_N_0409	690502	690661	-1	Region	intra				new transcription segment	NA(CDS:THC0290_0566);NA(CDS:THC0290_0567)	1192	A1742	B546	C143	160	0	0	0	0	-	0	NA	NA	NA	-	10.3	10.2	10.1	10	10.5	10.6	11.1	11.2	11.8	11.8	10.4	10.2	11.4	11.8	11.7	11.5	11.2	11.8	12.1	11.7	10.5	10.4	10.5	10.6
THC0290_0567	690662	692281	-1	CDS	NA		THC0290_v2_0606		Probable modification methyltransferase	NA	2218	A982	B309	C84	1620	0	0	0	0	-	NA	NA	NA	NA	-	10.5	10.4	9.6	9.8	9.9	9.8	10.3	11.5	10.7	10.9	10	10	10.6	10.7	11.1	11.2	10.7	10.7	10.4	9.8	10.4	10.6	10.7	10.8
THC0290_0568	692281	693381	-1	CDS	NA		THC0290_v2_0607		Probable restriction endonuclease	NA	2219	A982	B309	C84	1101	0	0	0	0	-	NA	NA	NA	NA	-	11.8	11.7	11.1	11	11.1	11.2	11.4	12.2	11.3	11.9	11.3	11.4	12.3	12.3	12	12	12.2	12.4	12.1	11.8	11.7	11.9	12	12
THC0290_N_0410	693406	693624	-1	Region	repeated_region				new transcription segment	NA	3794	A842	B255	C69	219	0	0	0	0	-	0	NA	NA	NA	-	11.5	11.1	10.5	10.3	9.9	10	10.7	9.5	9.1	9.2	10.9	10.8	10.9	10.7	11.3	11.1	10.8	10.4	9.9	9.5	11.4	11.5	11.2	11.8
THC0290_0569	693625	694329	-1	CDS	NA		THC0290_v2_0608		Protein of unknown function	NA	3795	A842	B255	C69	705	0	0	0	0	-	NA	NA	NA	NA	-	11.4	11.1	10.9	10.4	10.1	10.1	10.7	10.1	9.5	9.9	11.2	11.1	11.2	11	11.3	11.5	10.9	10.7	9.8	11	11.5	11.4	11.4	11.6
THC0290_0570	694331	695638	-1	CDS	NA		THC0290_v2_0609		Protein of unknown function	NA	2243	A1206	B415	C124	1308	0	0	0	0	-	NA	NA	NA	NA	-	11	10.9	10.5	10.5	10.5	10.5	11.1	11	10.8	11.1	10.9	11	12	12.2	12.1	12.1	11.7	11.7	11.1	11	11	11.2	11.2	11.2
THC0290_N_0411	695663	696066	-1	Region	repeated_region				new transcription segment	NA	1553	A1765	B546	C143	404	0	0	0	0	-	0	NA	NA	NA	-	11.6	11.5	11.3	11.4	12	12.5	12.8	12	13	13.3	11.4	11.4	13.9	13.4	13.5	13.1	12.8	12.9	12.9	12.2	11.7	11.7	11.6	11.7
THC0290_0571	696067	696396	-1	CDS	NA		THC0290_v2_0611		Hypothetical protein	NA	781	A1580	B530	C143	330	0	0	0	0	-	NA	NA	NA	NA	-	12.2	12.3	12.7	12.5	13.2	13.4	13.5	11.6	14.3	14.2	12.5	12.7	14.1	13.9	14	13.8	14	13.7	14	13.9	12.5	12.9	12.8	12.9
THC0290_N_0412	696397	696658	-1	Region	repeated_region				new transcription segment	NA	1269	A1768	B546	C143	262	0	0	0	0	-	0	NA	NA	NA	-	9.6	9.4	9.2	9	9.9	10.4	10.5	10.5	11.6	12	9.5	9.3	12.6	12.6	12.3	12	12.7	12.6	12.7	13	9.7	10.1	10.2	10.3
THC0290_N_0413	696660	696739	-1	Region	intra				new transcription segment	NA(Region:THC0290_N_0412);NA(CDS:THC0290_0572)	2031	A1732	B546	C143	80	0	0	0	0	-	0	NA	NA	NA	-	8.5	8.5	7.6	7.7	7.4	7.2	7.6	7.2	9	8.5	7.9	7.9	9.8	10.6	10.1	9.6	11.1	9.7	10	11.9	8.5	8.6	9.3	9.8
THC0290_0572	696740	697474	-1	CDS	NA		THC0290_v2_0612		Hypothetical lipoprotein precursor	NA	90	A1200	B413	C124	735	0	0	0	0	-	NA	NA	NA	NA	-	8	7.9	6.9	6.4	6.3	6.3	6.2	6.3	7.2	7.9	7.4	7.5	9.2	9.5	9.6	9.2	8.9	8.5	8.8	8.4	7.9	8.2	8.8	9.3
THC0290_N_0414	697475	697762	-1	Region	repeated_region				new transcription segment	NA	89	A1200	B413	C124	288	0	0	0	0	-	0	NA	NA	NA	-	10.5	10	9.8	9.8	9.9	9.7	10	9.6	10.6	10.4	10.1	9.9	10.9	10.9	10.6	10.4	10	10.4	10.5	10.2	10.4	10.3	10.6	10.9
THC0290_0573	697763	698500	-1	CDS	NA		THC0290_v2_0613		Hypothetical protein	NA	91	A1200	B413	C124	738	0	0	0	0	-	NA	NA	NA	NA	-	8.9	8.6	7.8	7.6	7.1	6.7	6.9	6.9	7.9	8.5	8.4	8.4	9.3	9.4	9.5	9.5	8.6	8.4	8.8	8.9	8.7	9.2	9.4	9.8
THC0290_N_0415	698501	698961	-1	Region	repeated_region				new transcription segment	NA	1362	A1765	B546	C143	461	0	0	0	0	-	0	NA	NA	NA	-	11.2	11	10.6	11	11.1	11.5	11.6	10	12.5	12.4	11.1	11.1	12.9	12.8	12.5	11.9	12.3	12.7	13	11.9	11.5	11	11.5	11.6
THC0290_0574	698962	700197	-1	CDS	NA		THC0290_v2_0614		Major facilitator superfamily (MFS) permease	NA	292	A1191	B409	C123	1236	0	0	0	0	-	NA	NA	NA	NA	-	10.3	10.2	10	10	10.2	9.9	10.5	10.1	11	10.6	10.4	10.1	10.9	11	11.3	11	10.5	10.5	10.1	9.2	10.4	10.3	10.8	11
THC0290_N_0416	700198	700330	-1	Region	intra				new transcription segment	NA(CDS:THC0290_0574);NA(CDS:THC0290_0575)	1062	A1697	B546	C143	133	0	0	0	0	-	0	NA	NA	NA	-	10.3	10.1	9.7	9.4	9.4	10.4	9.7	10.7	10.6	11.3	10.2	9.9	12	11.6	10.7	10.7	11.8	12.6	12.4	12	10.4	10.4	10.7	11
THC0290_0575	700331	701341	-1	CDS	NA		THC0290_v2_0615		Transposase IS3 family	NA	92	A1201	B413	C124	1011	0	0	0	0	-	NA	NA	NA	NA	-	10.1	9.9	9.1	9	8.7	8.5	8.8	8.6	9.2	9	9.7	9.5	10.1	10.2	9.9	9.7	9.7	9.7	9.3	9.7	10.2	10	10.3	10.7
THC0290_0576	701362	701715	-1	CDS	NA		THC0290_v2_0616		Transposase IS3 family	NA	116	A1155	B394	C120	354	0	0	0	0	-	NA	NA	NA	NA	-	10.9	10.8	10.4	10.2	10	10	10.2	11.1	10.9	10.7	10.7	10.7	11.2	11.4	10.8	10.7	10.8	10.8	11	11	11.1	11.1	11	11.4
THC0290_N_0417	701716	701820	-1	Region	repeated_region				new transcription segment	NA	117	A1155	B394	C120	105	0	0	0	0	-	0	NA	NA	NA	-	11.5	11.3	10.8	10.8	10.4	10.8	10.5	11.4	11.1	11.4	11.4	11.2	12	11.6	11	11	10.7	11.6	11.4	10.7	11.7	11.5	11.5	11.7
THC0290_N_0418	701821	701855	-1	Region	repeated_region				new transcription segment	NA	-1	NA	NA	NA	35	0	0	0	0	-	0	NA	NA	NA	-	NA	NA	NA	NA	NA	NA	NA	NA	NA	NA	NA	NA	NA	NA	NA	NA	NA	NA	NA	NA	NA	NA	NA	NA
THC0290_N_0419	701857	702286	-1	Region	repeated_region				new transcription segment	NA	2029	A1722	B546	C143	430	0	0	0	0	-	0	NA	NA	NA	-	10.8	10.7	10.4	10.6	10.5	11	10.8	10.4	11.1	11.1	11.1	10.6	12.3	11.8	11.3	11.1	11.1	11.5	12	11.5	11	10.8	10.7	11
THC0290_0577	702287	703369	-1	CDS	NA		THC0290_v2_0618		Protein of unknown function	NA	3463	A600	B183	C44	1083	0	0	0	0	-	NA	NA	NA	NA	-	12.3	12.3	12.1	12	11.5	11.3	11.1	10.1	10.5	10.1	12.2	12.2	9.7	9.5	10.3	10.4	10.1	9.8	9.8	10.6	12.4	12.3	12.4	12.6
THC0290_0578	703366	704418	-1	CDS	NA		THC0290_v2_0619		Site-specific DNA-methyltransferase (adenine-specific)	NA	3462	A600	B183	C44	1053	0	0	0	0	-	NA	NA	NA	NA	-	12.3	12.1	11.9	11.9	11.5	11.5	11.1	10.9	10.4	10.1	12.2	12.1	9.9	9.6	10	10.2	9.7	9.9	9.3	9.3	12.1	12.2	12.2	12.4
THC0290_N_0420	704419	704581	-1	Region	5prime				new transcription segment	NA(CDS:THC0290_0578)	2737	A497	B175	C44	163	0	0	0	0	-	0	NA	NA	NA	-	11.5	11.3	11.4	11.1	10.9	11.7	10.9	10.8	10.9	10.9	11.8	11.4	10.9	10.4	10.1	10.2	9.9	10.5	10.9	9.3	11.7	11.8	11.6	11.9
THC0290_0579	704607	705650	-1	CDS	NA		THC0290_v2_0620		Integrase/recombinase	NA	4205	A1050	B346	C102	1044	0	0	0	0	-	NA	NA	NA	NA	-	11	11	11.4	11.2	11.2	11.6	11.3	8.7	11.1	11.1	11.4	11.1	11.3	10.9	10.6	10.2	10.9	11	11	10.9	11.3	10.6	10.4	10.5
THC0290_N_0421	705651	706023	-1	Region	intra				new transcription segment	NA(CDS:THC0290_0579);gpmI(CDS:THC0290_0580)	4008	A882	B273	C75	373	0	0	0	0	-	0	NA	NA	NA	-	10.2	10	10.1	9.9	9.6	10.1	9.9	7.3	9.5	9.8	10.2	9.9	10.4	10.2	10.6	10.2	10.1	10.1	9.7	10.4	10.5	9.8	9.8	10
THC0290_0580	706024	707541	-1	CDS	NA	gpmI	THC0290_v2_0621	gpmI	2,3-bisphosphoglycerate-independent phosphoglycerate mutase	NA	3667	A427	B164	C44	1518	0	0	0	0	-	NA	NA	NA	NA	-	11.9	11.8	12.1	11.9	11.5	12.1	11.9	9.8	11.9	12.1	12.3	12	11.6	11.2	11.4	11	11.3	11.3	10.7	10.4	12.2	11.4	11.9	12
THC0290_N_0422	707542	707627	-1	Region	5prime				new transcription segment	gpmI(CDS:THC0290_0580)	3942	A883	B273	C75	86	1	0	0	1	THC0290_flavo-1_0029	0	NA	NA	NA	-	8.6	8.4	8.4	8.2	7.8	8.9	8.7	6.5	8.9	9.7	8.6	8.5	9.6	9.1	8.9	8.3	8	10	9.6	9.4	8.7	8.1	8.9	8.9
THC0290_flavo-1_0029	707553	707630	1	misc_RNA	NA				Flavo-1 RNA	NA	147	A927	B288	C79	78	1	1	0	0	THC0290_N_0422	NA	NA	NA	NA	-	6.6	6.4	5.7	5.2	5.7	4.8	5.9	6.7	5.7	4.9	5.7	6.1	5.8	6.5	7.1	6.4	3.9	3.9	3.9	8.4	6.3	6.6	6.6	6.7
THC0290_0581	707782	708492	1	CDS	NA		THC0290_v2_0622		Protein of unknown function	NA	1517	A1765	B546	C143	711	1	1	0	0	THC0290_N_0423	NA	NA	NA	NA	-	8.6	8.8	9.9	10	10.4	10.4	10.7	11.4	11.2	11.1	9.8	9.9	12	12.5	11.7	11.4	11.9	11.6	11.4	11.5	8.5	8.8	8.3	8.3
THC0290_N_0423	708013	708480	-1	Region	3prime				new transcription segment	NA(CDS:THC0290_0582)	189	A1222	B417	C125	468	1	0	1	0	THC0290_0581	0	NA	NA	NA	-	6	6	7.3	6.5	7	7.7	7.2	9.3	5.9	6.5	6.3	6.3	7.9	4.7	7	6.2	7.2	6.4	6.1	5.6	6.9	6.7	6.6	6.7
THC0290_0582	708481	710181	-1	CDS	NA		THC0290_v2_0623		Protein of unknown function containing peptidoglycan binding domain	NA	596	A1103	B371	C109	1701	2	2	0	0	THC0290_N_0424;THC0290_N_0425	NA	NA	NA	NA	-	8.9	9	9.9	9.9	10.8	11	11	10.3	10.4	10.8	9.8	9.9	10.6	9.8	10.8	10.7	10.5	10.7	10.4	10	9.1	8.6	9.3	9.4
THC0290_N_0424	708493	708688	1	Region	3prime				new transcription segment	NA(CDS:THC0290_0581)	348	A1645	B540	C143	196	1	0	1	0	THC0290_0582	1	708580,708624,+	1	45	MNKNIICNSYHNCF	7.5	7.3	8.1	8.2	8.6	8.6	8.9	10.6	9.7	9.7	8.1	8.3	9.7	10.5	9.6	9.4	10.1	9.8	8.7	7.9	7.1	7.4	6.9	6.4
THC0290_N_0425	708689	709190	1	Region	3prime-PT				new transcription segment	NA	349	A1645	B540	C143	502	1	0	1	0	THC0290_0582	0	NA	NA	NA	-	6.9	6.8	7	7.2	7.3	7.4	7.4	10	8.1	8.1	7.2	6.8	9.5	9.7	8.7	8.3	8	9.1	9.1	6.8	6.8	6.8	5.6	6.4
THC0290_0583	710191	710622	-1	CDS	NA	yitI	THC0290_v2_0624	yitI	Acetyltransferase, GNAT family, YitI	NA	1911	A1243	B419	C125	432	0	0	0	0	-	NA	NA	NA	NA	-	8.4	8.7	9.3	9.4	9.8	10.6	10.3	10.5	10	10.4	9.4	9.4	10.5	9.5	9.9	10.3	9.7	10.6	12	11.2	9	9.2	8.7	8.8
THC0290_N_0426	710623	710986	-1	Region	3prime-PT				new transcription segment	NA	4215	A1037	B342	C102	364	2	1	0	1	THC0290_N_0427;THC0290_tRNA_0012	0	NA	NA	NA	-	5.5	5.7	7.5	7.6	8.6	8.7	8.7	8.4	7.4	7.2	7.2	7.5	7.5	6.6	7.8	7.8	7.4	7.9	8.8	4.4	5.4	5.3	5.5	5.4
THC0290_N_0427	710823	710903	1	Region	5prime				new transcription segment	NA(Region:THC0290_N_0428)	314	A1183	B406	C122	81	1	1	0	0	THC0290_N_0426	0	NA	NA	NA	-	5.8	5.7	6.4	5.8	6.6	6.6	6.7	7.8	8.1	7.7	6.6	6.4	8.2	8	7.6	7.9	3.9	7.9	8.8	5.1	5.9	6.6	5.6	6.2
THC0290_tRNA_0012	710904	710976	1	tRNA	NA				transfer RNA-Gly	NA	1655	A1769	B546	C143	73	1	1	0	0	THC0290_N_0426	NA	NA	NA	NA	-	10	9.7	10.2	10.2	10.8	13.5	12.4	14.3	13.2	15	10.8	10	15	13.1	12.4	12.3	12.8	14.1	15.1	13.3	10.5	10.7	9.7	10.5
THC0290_N_0428	710977	711006	1	Region	3prime				new transcription segment	NA(Region:THC0290_N_0427)	-1	NA	NA	NA	30	1	1	0	0	THC0290_N_0429	0	NA	NA	NA	-	NA	NA	NA	NA	NA	NA	NA	NA	NA	NA	NA	NA	NA	NA	NA	NA	NA	NA	NA	NA	NA	NA	NA	NA
THC0290_N_0429	710987	711011	-1	Region	3prime				new transcription segment	pepE(CDS:THC0290_0584)	-1	NA	NA	NA	25	1	1	0	0	THC0290_N_0428	0	NA	NA	NA	-	NA	NA	NA	NA	NA	NA	NA	NA	NA	NA	NA	NA	NA	NA	NA	NA	NA	NA	NA	NA	NA	NA	NA	NA
THC0290_0584	711012	711719	-1	CDS	NA	pepE	THC0290_v2_0626	pepE	Dipeptidase E	NA	4207	A1035	B342	C102	708	0	0	0	0	-	NA	NA	NA	NA	-	9.7	9.7	10.8	10.7	11.2	11.5	11.4	10.5	11.5	11.3	10.7	10.9	10.5	9.9	10.5	10.4	10.4	10.5	10.4	10.6	9.9	9.6	9.8	9.7
THC0290_0585	711836	712555	1	CDS	NA		THC0290_v2_0627		Protein of unknown function precursor	NA	657	A1348	B467	C136	720	0	0	0	0	-	NA	NA	NA	NA	-	8.3	8.2	7.5	7.5	6.9	6.8	6.8	8.2	6.4	7.2	7.3	7.2	9.4	9.4	8.9	8.9	9	8.8	9.3	10.3	8.5	8.9	9.7	9.6
THC0290_0586	712569	713072	1	CDS	NA		THC0290_v2_0628		Protein of unknown function	NA	652	A1347	B467	C136	504	0	0	0	0	-	NA	NA	NA	NA	-	8.1	8.1	7.8	7.7	7.4	7.6	7.5	8.3	7.5	7.8	7.8	7.9	8.7	8.3	8.1	8.5	7.1	7.5	7.6	8	8.3	8.9	9	8.9
THC0290_0587	713131	715374	1	CDS	NA		THC0290_v2_0629		Probable M1 family aminopeptidase precursor	NA	1985	A1446	B502	C142	2244	0	0	0	0	-	NA	NA	NA	NA	-	10.7	10.8	11.6	11.5	11.3	11.2	11.2	11	10.6	10.8	11.3	11.4	11.6	11.7	11.7	11.7	11.8	11.9	12.4	12.6	10.9	11.1	11.5	11.3
THC0290_N_0430	715403	715513	-1	Region	3prime				new transcription segment	NA(CDS:THC0290_0588)	108	A1149	B391	C118	111	0	0	0	0	-	0	NA	NA	NA	-	8.5	8.3	8.4	8.2	7.7	7.2	7.2	7.8	8.2	7.3	8.5	8.8	8.1	9.3	8.3	8.6	9.2	8.2	8.9	8.7	8.3	8.4	8.3	8.2
THC0290_0588	715514	716959	-1	CDS	NA		THC0290_v2_0630		Probable amino acid-transporting permease	NA	2976	A552	B181	C44	1446	0	0	0	0	-	NA	NA	NA	NA	-	10.1	10	9.7	9.8	8.8	8.4	8.1	7	8.2	7.9	10.2	10	7.8	8.3	8.2	8.1	7	8	7.4	8.2	9.9	9.8	9.7	9.7
THC0290_0589	717168	718190	1	CDS	NA	ruvB	THC0290_v2_0631	ruvB	Holliday junction DNA helicase RuvB	NA	4014	A899	B279	C76	1023	0	0	0	0	-	NA	NA	NA	NA	-	10.2	10.1	10.1	9.9	9.8	10.2	9.9	8.1	10.7	10.4	10.1	9.8	9.7	9.5	9.6	9.5	10	9.3	10.8	10.6	10.3	10.1	10.5	10.5
THC0290_N_0431	718191	718260	1	Region	3prime				new transcription segment	ruvB(CDS:THC0290_0589)	3543	A606	B183	C44	70	0	0	0	0	-	0	NA	NA	NA	-	9.9	9.7	9.3	9.1	8.8	9	8.7	7.6	8.5	8.8	9.4	9.1	8.3	6.9	8.4	8.1	8	8	8.6	8.3	10.1	10	10	10.3
THC0290_0590	718261	719187	1	CDS	NA		THC0290_v2_0632		Putative 4Fe-4S binding protein	NA	2992	A576	B183	C44	927	0	0	0	0	-	NA	NA	NA	NA	-	8.2	8.1	7.4	7.3	6.6	6.6	6.2	6.2	5.8	5.6	7.6	7.5	4.3	6.5	6.1	5.5	6.6	5.1	7.4	4.1	8.4	8.2	8.2	8.5
THC0290_0591	719251	721566	1	CDS	NA	maeB	THC0290_v2_0633	maeB	Malate dehydrogenase (oxaloacetate-decarboxylating) (NADP+)	NA	3333	A605	B183	C44	2316	0	0	0	0	-	NA	NA	NA	NA	-	11.8	11.8	11.6	11.6	11.3	11.1	11.3	9.3	10.7	10.6	11.6	11.5	10	9.9	10.2	10.3	9.6	9.6	9.6	9.4	11.8	11.5	11.8	11.8
THC0290_N_0432	721567	721639	1	Region	intra				new transcription segment	ruvA(CDS:THC0290_0592);maeB(CDS:THC0290_0591)	3334	A605	B183	C44	73	0	0	0	0	-	0	NA	NA	NA	-	11.2	11.1	10.9	10.8	10.6	10.1	10.3	9.3	9.9	10	11.1	11	8.9	9.1	9.6	9.7	9.1	8.5	8.9	9.2	11.2	11.1	11.1	11.3
THC0290_0592	721640	722221	1	CDS	NA	ruvA	THC0290_v2_0634	ruvA	Holliday junction DNA helicase RuvA	NA	3573	A580	B183	C44	582	0	0	0	0	-	NA	NA	NA	NA	-	11.6	11.6	11.1	11.2	10.8	10.5	10.7	10.6	10	10.1	11.4	11.5	10.3	10.6	10.2	10.2	10.1	10.3	10.6	10.8	11.5	11.4	11.5	11.4
THC0290_0593	722225	729463	1	CDS	NA	sprA	THC0290_v2_0635	sprA	Putative adhesin precursor SprA	NA	4245	A663	B187	C46	7239	0	0	0	0	-	NA	NA	NA	NA	-	10.6	10.6	10.5	10.5	10.4	10.4	10.1	9.9	9.7	9.6	10.9	10.7	9.6	9.3	9.9	10	9.2	9.9	10	9.3	10.8	10.8	10.3	10.4
THC0290_N_0433	729464	729774	1	Region	intra				new transcription segment	NA(CDS:THC0290_0594);sprA(CDS:THC0290_0593)	4246	A664	B187	C46	311	0	0	0	0	-	0	NA	NA	NA	-	9.6	9.4	9.4	9	8.6	9	8.4	9.1	8.2	8.2	9.8	9.7	8.5	8.1	8.4	8.7	8.6	8.8	9.6	6.2	9.7	10	9	9.4
THC0290_0594	729775	729990	1	CDS	NA		THC0290_v2_0636		Conserved protein of unknown function	NA	3240	A599	B183	C44	216	0	0	0	0	-	NA	NA	NA	NA	-	10.9	10.9	10.3	10.3	9.5	9.1	8.7	8.8	7.4	7.1	10.6	10.8	7.9	7.8	8.8	8.9	7.9	7.6	5.6	5.9	11	11.1	10.5	10.6
THC0290_N_0434	729991	730208	1	Region	3prime				new transcription segment	NA(CDS:THC0290_0594)	3571	A601	B183	C44	218	0	0	0	0	-	0	NA	NA	NA	-	12.1	12.1	11.6	11.3	10.7	10.7	9.8	10.1	9.2	8.8	12	12	9.7	9.3	9.9	9.9	8.9	9.5	10	8.6	11.9	12.4	11.5	11.7
THC0290_N_0435	730209	730951	1	Region	intra				new transcription segment	gcvH(CDS:THC0290_0595);NA(Region:THC0290_N_0434)	2796	A318	B119	C33	743	0	0	0	0	-	0	NA	NA	NA	-	11.6	11.3	10.6	10.7	9.8	9.4	9.2	9.2	8.8	8.8	10.9	11.2	10	10.8	10	9.8	10.3	10.5	10.8	11.3	11.4	11.4	10.7	10.9
THC0290_0595	730973	731353	1	CDS	NA	gcvH	THC0290_v2_0640	gcvH	Glycine cleavage system H protein	NA	3424	A600	B183	C44	381	0	0	0	0	-	NA	NA	NA	NA	-	13.4	13.6	13.7	13.9	13.4	13.3	12.3	12.6	12.6	12.5	13.8	13.9	12	12.1	11.8	11.8	12.1	12.5	12.7	12.8	13.5	13.6	13.8	13.5
THC0290_N_0436	731354	731426	1	Region	intra				new transcription segment	fjo27(CDS:THC0290_0596);gcvH(CDS:THC0290_0595)	3426	A600	B183	C44	73	0	0	0	0	-	0	NA	NA	NA	-	13.6	13.3	13.4	13.8	13	13.1	12	12.8	12.1	11.9	13.3	13.3	11.5	11.5	11.4	11.5	10.9	11.1	11.4	10.6	13.1	13.4	13.3	13.4
THC0290_0596	731427	731732	1	CDS	NA	fjo27	THC0290_v2_0641		Conserved membrane protein of unknown function	NA	3427	A600	B183	C44	306	0	0	0	0	-	NA	NA	NA	NA	-	13.7	13.5	13.6	13.8	13.1	13.2	11.9	12.6	12.1	11.9	13.8	13.7	11.5	11.5	11.3	11.7	11.1	11.2	11.3	11.1	13.1	13.8	13.6	13.6
THC0290_0597	731804	732547	1	CDS	NA	deoC	THC0290_v2_0642	deoC	Deoxyribose-phosphate aldolase	NA	3422	A600	B183	C44	744	0	0	0	0	-	NA	NA	NA	NA	-	11	10.9	10.6	10.5	9.9	9.5	9.5	8.8	9.1	9.2	10.6	10.5	8.1	8.8	8.2	8.5	9.3	8.7	8.6	8.5	10.9	10.8	10.9	11
THC0290_0598	732558	734672	1	CDS	NA		THC0290_v2_0643		Uncharacterized protein	NA	3419	A600	B183	C44	2115	1	1	0	0	THC0290_N_0437	NA	NA	NA	NA	-	10.2	10	9.7	9.6	9.3	9.1	9.2	8.8	9.1	8.8	9.8	9.7	8.3	8.5	8.2	8.2	8.9	8	6.9	9.3	9.9	9.9	10.1	9.9
THC0290_N_0437	734570	734926	-1	Region	repeated_region				new transcription segment	NA	2353	A374	B142	C40	357	2	1	1	0	THC0290_0598;THC0290_N_0438	1	734650,734781,-	0.999	132	MTTSSINIPVFLKLNWYKTDYTILSVKIKDTNINLFSNNPSTS	7.6	8	8.3	8.1	7.9	8.5	7.7	7.8	7.2	7.8	7.8	7.5	7.7	3.9	7.5	7.3	7	6.9	6.2	8.1	8.2	8.5	7.6	7.6
THC0290_N_0438	734673	735247	1	Region	repeated_region				new transcription segment	NA	287	A1842	B563	C145	575	3	2	1	0	THC0290_0599;THC0290_N_0437;THC0290_N_0439	1	734841,734885,+	0.53	45	MTNCMFFYPSKFKL	6.7	6.4	6.5	7.1	6.6	8	7.4	10.4	8.2	8.9	6.6	6	9.1	5.5	7.2	8	7.2	7.3	8.9	7.4	7.4	6.9	6.9	7.1
THC0290_N_0439	734927	735002	-1	Region	3prime				new transcription segment	NA(CDS:THC0290_0599)	-1	NA	NA	NA	76	1	1	0	0	THC0290_N_0438	0	NA	NA	NA	-	NA	NA	NA	NA	NA	NA	NA	NA	NA	NA	NA	NA	NA	NA	NA	NA	NA	NA	NA	NA	NA	NA	NA	NA
THC0290_0599	735003	736340	-1	CDS	NA		THC0290_v2_0644		Probable membrane fusion efflux protein	NA	2568	A258	B91	C27	1338	1	1	0	0	THC0290_N_0438	NA	NA	NA	NA	-	11.9	12.1	12.3	12.3	11.8	12	11.7	10.9	11.2	11.2	11.7	11.7	10.3	10.1	11.1	11.2	10.9	10.8	10.5	10.6	12.1	12.1	11.9	11.8
THC0290_0600	736346	737788	-1	CDS	NA		THC0290_v2_0645		Probable outer membrane efflux protein precursor	NA	2117	A1412	B488	C140	1443	0	0	0	0	-	NA	NA	NA	NA	-	11.1	11.2	11.2	11.3	10.9	11.6	11	11.9	11.4	11.3	10.4	10.7	10.8	10.2	10.6	10.5	11.3	11.6	12.7	12.3	11.2	11.2	10.9	10.6
THC0290_0601	737937	739331	1	CDS	NA		THC0290_v2_0646		Probable lipoprotein precursor	NA	1991	A1699	B546	C143	1395	1	1	0	0	THC0290_N_0440	NA	NA	NA	NA	-	8.6	8.8	8.7	8.6	8.9	8.9	8.6	8.9	9.2	9.4	8.7	8.8	9.7	10	8.7	8.7	10.5	10.6	10.3	10.5	8.9	8.8	8.8	8.6
THC0290_N_0440	738918	739331	-1	Region	3prime				new transcription segment	NA(CDS:THC0290_0602)	2414	A166	B61	C19	414	1	0	1	0	THC0290_0601	0	NA	NA	NA	-	8.5	8.3	8.3	8.3	9	8.7	9.3	10.6	8.8	8.3	8.1	8.1	7.7	8.3	8.2	8.4	8.2	7.2	6	7.2	8.6	8.6	8.6	8.5
THC0290_N_0441	739332	739567	1	Region	3prime				new transcription segment	NA(CDS:THC0290_0601)	946	A1420	B491	C140	236	1	0	1	0	THC0290_0602	0	NA	NA	NA	-	8.5	8.4	8.4	8.5	8.9	8.9	8.8	9	10.1	9.7	8.4	8.3	9.6	9.6	8.1	8.1	9	9	9.4	8.5	8.3	8.5	8.6	8
THC0290_0602	739332	739574	-1	CDS	NA		THC0290_v2_0647		Hypothetical transmembrane protein	NA	2362	A182	B66	C21	243	1	1	0	0	THC0290_N_0441	NA	NA	NA	NA	-	10.4	10.4	10.2	10.4	10.9	11	11	12.6	10.1	10	10	10	9.4	8.8	9.5	9.7	8.2	9.1	8.9	9.5	10.3	10.6	10.5	10.7
THC0290_0603	739564	740106	-1	CDS	NA	yozB	THC0290_v2_0648	yozB	YozB protein	NA	2363	A182	B66	C21	543	0	0	0	0	-	NA	NA	NA	NA	-	10.7	10.7	10.6	10.9	11.3	11.5	11.1	12.4	10.5	10.4	10.4	10.6	9.8	10.3	10.3	10.5	10.1	9.7	9.9	10.3	10.8	11	11	10.9
THC0290_N_0442	740107	740192	-1	Region	intra				new transcription segment	yozB(CDS:THC0290_0603);ypmQ(CDS:THC0290_0604)	2415	A166	B61	C19	86	0	0	0	0	-	0	NA	NA	NA	-	9.4	9.2	9.1	9.3	10	9.6	10	11.2	9.5	9.7	9.1	9.2	8.8	9.3	9.6	9.7	8	8.8	3.9	7	9.3	9.4	9.7	9.6
THC0290_0604	740193	740876	-1	CDS	NA	ypmQ	THC0290_v2_0649	ypmQ	Probable cytochrome c oxidase biogenesis protein YpmQ	NA	2361	A182	B66	C21	684	0	0	0	0	-	NA	NA	NA	NA	-	10.7	10.7	11	10.9	11.4	11.4	11.5	12.1	10.4	11.1	10.7	10.8	10.6	10.4	10.6	10.7	10.1	10.3	10.2	10.2	10.8	10.8	11.2	10.9
THC0290_0605	740986	741660	-1	CDS	NA		THC0290_v2_0650		Protein of unknown function	NA	569	A1691	B546	C143	675	0	0	0	0	-	NA	NA	NA	NA	-	10.3	10.2	10.1	10	10.5	11.1	10.6	11.2	10.3	10.4	9.6	10	11.2	11.1	10.7	10.6	11.6	11.7	11.5	12	10.3	10.3	10.6	10.7
THC0290_N_0443	741661	741738	-1	Region	3prime				new transcription segment	NA(CDS:THC0290_0606)	46	A769	B231	C65	78	0	0	0	0	-	0	NA	NA	NA	-	5.8	4.9	4.2	4	4.6	5.2	5.2	6.7	3.9	5.1	4.5	4.1	8.3	4	3.9	3.9	4.7	4	8.4	3.9	5	5.5	5.9	6.4
THC0290_0606	741739	742089	-1	CDS	NA		THC0290_v2_0651		Probable transmembrane protein of unknown function	NA	3640	A562	B183	C44	351	0	0	0	0	-	NA	NA	NA	NA	-	13.8	13.8	13.5	13.5	13.5	13.3	13.1	14.3	13	12.9	13.3	13.1	11.9	11.8	12.2	12.5	11.4	11.7	12	11.8	13.6	13.7	13.7	13.4
THC0290_0607	742118	743125	-1	CDS	NA		THC0290_v2_0652		Cytochrome c oxidase family protein	NA	3641	A562	B183	C44	1008	0	0	0	0	-	NA	NA	NA	NA	-	13.8	13.8	13.6	13.8	13.7	13.1	13.4	13.6	13.3	12.9	13.5	13.5	12	12	12.6	12.7	12.1	11.9	12.2	12.6	13.8	13.9	13.9	13.7
THC0290_0608	743166	743750	-1	CDS	NA	ctaE	THC0290_v2_0653	ctaE	Cytochrome c oxidase, subunit III	NA	2322	A805	B244	C67	585	0	0	0	0	-	NA	NA	NA	NA	-	11.1	11.2	10.7	10.8	11.2	11.1	11.3	12	11.5	11.3	10.8	10.8	10.4	10.3	11.1	11.2	10.2	10.6	10.1	10.1	11.1	11.5	11.7	11.7
THC0290_0609	743756	744658	-1	CDS	NA	cyoE	THC0290_v2_0654	cyoE	Protoheme IX farnesyltransferase	NA	2294	A788	B239	C67	903	0	0	0	0	-	NA	NA	NA	NA	-	9.9	10	9.5	9.5	9.8	9.6	10.3	9.9	10.7	10.4	9.6	9.4	9.9	9.5	10.2	10.4	9.7	9.7	9.2	8.2	10.1	10.2	10.2	10.3
THC0290_0610	744842	745510	1	CDS	NA		THC0290_v2_0655		Peptidase, M22 family	NA	1484	A1768	B546	C143	669	1	1	0	0	THC0290_N_0444	NA	NA	NA	NA	-	9.9	10.1	10.1	10.2	10.8	10.3	11.1	11.3	11.8	11.6	10.1	10.1	11.8	11.9	11.5	11.4	12.1	11.9	11.7	11.9	10	10.4	10.2	10.3
THC0290_N_0444	745438	745510	-1	Region	3prime				new transcription segment	NA(CDS:THC0290_0611)	1752	A1762	B546	C143	73	1	0	1	0	THC0290_0610	0	NA	NA	NA	-	12.4	12.8	14.1	14.2	15.1	15.5	15.3	15.8	15.3	15.3	13.7	13.9	16	15.4	15.6	15.2	15.8	15.6	15.4	15.3	12.7	12.8	13	12.7
THC0290_0611	745511	745864	-1	CDS	NA		THC0290_v2_0656		Protein of unknown function	NA	1753	A1762	B546	C143	354	0	0	0	0	-	NA	NA	NA	NA	-	11.3	11.5	12.6	12.7	13.6	14.2	13.8	14.1	13.6	14.2	12.2	12.5	14.7	14.3	13.9	13.8	15.1	15.1	14.6	14.5	11.4	11.5	11.9	11.8
THC0290_0612	745916	747976	-1	CDS	NA	yyaL	THC0290_v2_0657	yyaL	Protein of unknown function YyaL	NA	3521	A604	B183	C44	2061	0	0	0	0	-	NA	NA	NA	NA	-	10.4	10.2	10.5	10.3	10.2	10.4	10.9	8.7	10.2	10	10.6	10.4	9.6	8.6	9.7	9.9	9.1	9.3	8.5	9	10.4	10.1	10.8	10.9
THC0290_flavo-1_0030	747943	748014	1	misc_RNA	NA				Flavo-1 RNA	NA	1347	A1747	B546	C143	72	0	0	0	0	-	NA	NA	NA	NA	-	8.1	8	7.7	8	8.1	8	8.5	8.1	10.2	9.4	7.9	8	9.4	11.5	10.4	9.8	12.9	11	11.5	13.6	8.1	7.7	8.1	8.1
THC0290_0613	748106	749002	-1	CDS	NA		THC0290_v2_0658		Protein of unknown function	NA	787	A1558	B526	C143	897	0	0	0	0	-	NA	NA	NA	NA	-	11.1	11	11	10.9	11.3	12	12.7	9.7	12.7	13.4	11.2	10.9	12.8	12.6	12.3	11.9	13.1	12.9	11.9	11.8	11.4	10.7	11.5	11.8
THC0290_N_0445	749440	749519	1	Region	5prime				new transcription segment	NA(CDS:THC0290_0614)	1134	A1769	B546	C143	80	0	0	0	0	-	0	NA	NA	NA	-	10.2	10.1	10.7	10.6	10.8	12	11	11.1	11.2	12	10.7	11	12.2	11.7	10.8	11.1	12.6	14	14	12.2	9.8	10.2	9.6	9.9
THC0290_0614	749520	750518	1	CDS	NA		THC0290_v2_0660		Protein of unknown function precursor	NA	4041	A260	B92	C27	999	0	0	0	0	-	NA	NA	NA	NA	-	12	12.1	12.4	12.5	12.6	12.3	12.3	11.8	12.3	11.9	12.4	12.5	11.6	11.8	11.7	12.1	11.9	11.8	11.8	12.2	11.7	12	12.1	12.1
THC0290_N_0446	750519	750565	1	Region	3prime				new transcription segment	NA(CDS:THC0290_0614)	9	A768	B230	C65	47	0	0	0	0	-	0	NA	NA	NA	-	4.9	4.6	5.2	4.1	4.8	5.2	6.4	5.1	7	7.1	5	4.8	6.6	4	3.9	5.5	4.1	4	8.4	3.9	3.9	5.2	5.2	5.7
THC0290_0615	750566	751084	1	CDS	NA		THC0290_v2_0661		Carbonic anhydrase/acetyltransferase family protein	NA	774	A1407	B485	C140	519	0	0	0	0	-	NA	NA	NA	NA	-	10.7	10.6	10.5	10.6	11.1	10.7	11.5	9.5	12.1	11.6	10.6	10.5	10.7	11.7	11	10.8	12.1	11.2	11.6	13.1	10.6	10.4	11.1	11.2
THC0290_N_0447	751085	752281	1	Region	3prime				new transcription segment	NA(CDS:THC0290_0615)	331	A1248	B419	C125	1197	2	1	1	0	THC0290_0616;THC0290_N_0448	0	NA	NA	NA	-	8.2	7.9	7.9	8.1	8.3	9	9	9.5	9.6	9.3	8.1	7.7	8.8	8.9	8.5	8.8	8.3	8.6	9.9	8.2	8	8	8.1	8.4
THC0290_flavo-1_0031	751362	751432	1	misc_RNA	NA				Flavo-1 RNA	NA	4397	A1195	B411	C123	71	0	0	0	0	-	NA	NA	NA	NA	-	7	6.8	6.9	7.2	7.6	7.4	8.5	7.6	9.5	9	7.2	6.8	7.5	8.8	7.6	8.3	8.3	5.6	4	7.7	6.8	7.2	7.5	7.9
THC0290_0616	751461	752240	-1	CDS	NA	murI	THC0290_v2_0662	murI	Glutamate racemase	NA	3960	A25	B13	C6	780	1	1	0	0	THC0290_N_0447	NA	NA	NA	NA	-	9.7	9.7	9.6	9	8.9	9.7	9	8.3	9.2	9.5	9.7	9.5	9.8	9.7	8.9	8.5	10.2	10.2	10.1	10.7	10.3	9.1	10	10.1
THC0290_N_0448	752241	752304	-1	Region	3prime				new transcription segment	NA(CDS:THC0290_0617)	466	A1424	B494	C141	64	1	1	0	0	THC0290_N_0447	0	NA	NA	NA	-	4.1	4.2	4.1	4.4	4.3	4.3	3.9	4.3	4.3	4.3	4	4	5.6	5.6	5.6	4.1	3.9	7.1	8.1	3.9	4.6	3.9	4.1	4.1
THC0290_0617	752305	752805	-1	CDS	NA		THC0290_v2_0663		Outer membrane protein precursor OmpH family P18	NA	3742	A400	B152	C42	501	0	0	0	0	-	NA	NA	NA	NA	-	14.1	13.9	14	13.7	12.8	13.7	12.2	12.8	10.8	11.9	14.3	13.9	13.3	12.3	12.8	13.1	12	12.7	12.9	12.3	14.1	14.2	14	13.8
THC0290_N_0449	752806	752848	-1	Region	intra				new transcription segment	NA(CDS:THC0290_0617);skp(CDS:THC0290_0618)	-1	NA	NA	NA	43	0	0	0	0	-	0	NA	NA	NA	-	NA	NA	NA	NA	NA	NA	NA	NA	NA	NA	NA	NA	NA	NA	NA	NA	NA	NA	NA	NA	NA	NA	NA	NA
THC0290_0618	752849	753811	-1	CDS	NA	skp	THC0290_v2_0664	skp	Outer membrane chaperone precursor Skp (OmpH)	NA	3765	A857	B258	C70	963	0	0	0	0	-	NA	NA	NA	NA	-	12.7	12.7	12.5	12.1	11.3	11.7	11.5	11.4	9.8	11.1	12.4	12.4	12.7	12.4	12.6	12.4	12.4	12.6	12.6	12.7	12.9	12.9	13.1	13.3
THC0290_0619	753852	756521	-1	CDS	NA	bamA	THC0290_v2_0665	bamA	Outer membrane protein assembly complex precursor, BamA	NA	2852	A545	B180	C44	2670	0	0	0	0	-	NA	NA	NA	NA	-	12.3	12.2	11.5	11.3	10.3	10.2	10.2	11.1	9.4	9.7	11.6	11.7	11.9	11.9	11.8	11.6	11.3	11.2	10.6	10.8	12.3	12.7	12.7	12.9
THC0290_0620	756505	757245	-1	CDS	NA	uppS	THC0290_v2_0666	uppS	Di-trans,poly-cis-decaprenylcistransferase	NA	649	A1353	B467	C136	741	0	0	0	0	-	NA	NA	NA	NA	-	10.9	11	10.3	10.2	9.4	9.9	9.6	10	10.9	10.8	10.8	10.7	11.8	11.7	11.5	11.6	11.4	11.6	12.3	11.5	11.2	11.7	11	11
THC0290_0621	757252	757935	-1	CDS	NA		THC0290_v2_0667		Protein of unknown function precursor, putative outer membrane protein	NA	650	A1353	B467	C136	684	0	0	0	0	-	NA	NA	NA	NA	-	10.8	10.8	10.1	9.9	9.3	9.2	9.4	8.8	11	10.4	10.4	10.2	11.3	11.4	11.1	11	11.4	11.7	12.2	12.2	10.9	11.2	10.8	10.8
THC0290_N_0450	757950	758024	-1	Region	indep	Rfp31			new transcription segment	NA	1957	A1751	B546	C143	75	0	0	0	0	-	0	NA	NA	NA	-	8.6	8.5	8.4	8.3	8.2	9.1	8.6	8.6	10.2	11	8.8	8.8	11.8	11	10.5	10.5	10.6	11.8	13	10.9	8.7	8.9	8.2	8.4
THC0290_0622	758071	758955	-1	CDS	NA	ppnK	THC0290_v2_0668	ppnK	NAD(+) kinase	NA	3670	A430	B164	C44	885	0	0	0	0	-	NA	NA	NA	NA	-	10	10.1	10.2	10.1	9.8	9.8	9.9	9	9.5	9.5	10.3	10.4	9.6	9.6	9.9	9.7	9.7	9.7	8.2	8.6	10.3	10	10.2	10.3
THC0290_N_0451	758956	759031	-1	Region	intra				new transcription segment	ppnK(CDS:THC0290_0622);NA(CDS:THC0290_0623)	886	A1547	B523	C143	76	0	0	0	0	-	0	NA	NA	NA	-	9.6	9.7	9.5	9.7	9.4	9.6	9.3	9.9	9.6	9.8	9.6	9.5	10.2	10.6	9.8	9.8	10.8	10	10.4	10.9	9.6	9.5	9.8	9.7
THC0290_0623	759032	759691	-1	CDS	NA		THC0290_v2_0669		Protein of unknown function	NA	2150	A1610	B535	C143	660	0	0	0	0	-	NA	NA	NA	NA	-	10.2	10.4	10.4	10.5	10.6	10.4	10.2	11.2	10.6	10.7	10.6	10.7	10.6	10.8	10.7	10.8	11	10.6	10.6	10.5	10.2	10.5	10.1	9.9
THC0290_N_0452	759692	759919	-1	Region	5prime				new transcription segment	NA(CDS:THC0290_0623)	1452	A1768	B546	C143	228	0	0	0	0	-	0	NA	NA	NA	-	9.6	9.6	10.1	9.9	10	10.5	10.1	10.9	10.8	11.1	10.3	10.2	11.5	11.5	10.8	10.9	12.6	12.7	12.9	13.2	9.6	10.1	9.3	9.5
THC0290_0624	760002	760730	1	CDS	NA	pdxJ	THC0290_v2_0670	pdxJ	Pyridoxal phosphate biosynthetic protein PdxJ	NA	980	A1667	B542	C143	729	0	0	0	0	-	NA	NA	NA	NA	-	10.1	10.2	10	10.2	10.6	10.7	10.9	11.4	11.1	11.2	10.2	10.1	11.1	10.8	10.8	10.9	10.3	10.6	10.2	9.8	10.2	10.1	10.4	10.2
THC0290_N_0453	760731	761017	1	Region	3prime				new transcription segment	pdxJ(CDS:THC0290_0624)	1685	A1765	B546	C143	287	1	0	1	0	THC0290_0625	0	NA	NA	NA	-	8.9	8.9	8.6	8.9	9.5	9.2	9.9	11.8	10.4	10.3	8.7	8.8	10.7	10.8	10.7	10.7	10.2	10.6	10.5	10.3	8.9	9	8.9	8.8
THC0290_0625	760753	761388	-1	CDS	NA		THC0290_v2_0671		Putative ABC-type transport system, ATPase component	NA	2560	A254	B91	C27	636	2	2	0	0	THC0290_N_0453;THC0290_N_0454	NA	NA	NA	NA	-	7.4	7.6	7.8	7.9	7.8	7.9	7.6	8.1	7.3	7.3	7.9	7.9	7	7.1	7.6	7.1	6.9	6	7.6	6.4	7.2	7.5	7.8	7.3
THC0290_N_0454	761018	761188	1	Region	3prime-PT				new transcription segment	NA	2393	A148	B58	C19	171	1	0	1	0	THC0290_0625	0	NA	NA	NA	-	6.9	6.9	6.6	6.9	7.2	7.4	7.8	9.6	7.3	7.2	6.9	6.4	7.3	3.9	7.3	6.9	4.3	7.8	6.8	3.9	6.8	7.1	6.2	6.9
THC0290_0626	761381	762274	-1	CDS	NA		THC0290_v2_0672		Putative ABC-type transport system, permease component	NA	2341	A33	B20	C10	894	0	0	0	0	-	NA	NA	NA	NA	-	7.5	7.5	7.7	7.7	7.5	7.5	7.5	8.6	7.5	7.5	7.9	7.9	7.3	7.1	6.8	7.6	5.9	7.5	4	7.8	7.1	7.2	7.7	7.3
THC0290_0627	762372	763148	1	CDS	NA		THC0290_v2_0673		Probable hydrolase	NA	2261	A946	B299	C82	777	0	0	0	0	-	NA	NA	NA	NA	-	9.9	9.8	9.6	9.6	9.9	10	10.6	9.6	10.3	10.5	9.5	9.7	10.4	10	9.7	9.8	9.9	10.6	10.5	9.2	9.9	9.8	10.1	10.2
THC0290_N_0455	763149	763266	1	Region	intra				new transcription segment	NA(CDS:THC0290_0628);NA(CDS:THC0290_0627)	1119	A1574	B530	C143	118	0	0	0	0	-	0	NA	NA	NA	-	11	10.8	11.2	10.9	11.4	11.5	11.5	12.1	11.8	11.8	11.2	11.3	12	11.8	11.7	11.9	12.3	12.7	12.8	12.4	10.8	11.3	11	11.2
THC0290_0628	763267	763611	1	CDS	NA		THC0290_v2_0674		Probable transmembrane protein of unknown function	NA	746	A1574	B530	C143	345	0	0	0	0	-	NA	NA	NA	NA	-	11.8	11.8	12	12.1	12.7	12.6	12.4	13.3	12.4	12.3	12	12	12.4	12.6	12.2	12.4	12.9	12.9	12.5	12.4	11.6	11.9	12.1	11.8
THC0290_N_0456	763612	763681	1	Region	3prime				new transcription segment	NA(CDS:THC0290_0628)	568	A1402	B481	C139	70	0	0	0	0	-	0	NA	NA	NA	-	10	9.7	9.6	9.7	10.2	10.3	10.5	10.8	10.2	10.2	9.8	9.8	10.1	10.9	10.5	10.3	11.3	10.2	10.5	11.9	9.8	9.5	10.7	10.6
THC0290_0629	763697	765022	1	CDS	NA	tig	THC0290_v2_0675	tig	Trigger factor (TF)	NA	3220	A599	B183	C44	1326	0	0	0	0	-	NA	NA	NA	NA	-	14.3	14.3	13.8	13.5	12.6	12.8	12.8	12.2	12	12.8	13.9	13.7	12.8	12.5	12.8	12.7	12.2	12.6	12	11.7	14.4	14	14.5	14.7
THC0290_N_0457	765022	765049	1	Region	3prime				new transcription segment	tig(CDS:THC0290_0629)	-1	NA	NA	NA	28	0	0	0	0	-	0	NA	NA	NA	-	NA	NA	NA	NA	NA	NA	NA	NA	NA	NA	NA	NA	NA	NA	NA	NA	NA	NA	NA	NA	NA	NA	NA	NA
THC0290_N_0458	765050	765264	1	Region	5prime				new transcription segment	clpP(CDS:THC0290_0630)	3943	A901	B280	C77	215	1	0	0	1	THC0290_flavo-1_0032	0	NA	NA	NA	-	12	12	11.9	11.8	11.9	12.8	12.2	11.4	12.3	12.9	11.9	11.9	12.6	12.2	12	11.8	11.6	12.2	12.5	11.9	12.2	11.9	12.6	12.7
THC0290_flavo-1_0032	765084	765227	-1	misc_RNA	NA				Flavo-1 RNA	NA	150	A1545	B523	C143	144	1	1	0	0	THC0290_N_0458	NA	NA	NA	NA	-	5.1	5	5.3	4.8	4.1	4.4	5.2	4.7	3.9	6	5	4.7	7.2	7.9	7.7	4.4	8	3.9	3.9	10.4	4.3	5.2	4.7	5.4
THC0290_0630	765265	765966	1	CDS	NA	clpP	THC0290_v2_0676	clpP	S14 family, ATP-dependent Clp protease proteolytic subunit	NA	3541	A604	B183	C44	702	0	0	0	0	-	NA	NA	NA	NA	-	13.6	13.4	13.5	13.4	13.4	13.5	13.6	12.4	13.1	13.1	13.6	13.6	12.7	12.7	12.9	12.9	12.4	12.3	12.5	12.4	13.6	13.4	13.8	14.1
THC0290_N_0459	765967	766041	1	Region	intra				new transcription segment	clpX(CDS:THC0290_0631);clpP(CDS:THC0290_0630)	2700	A457	B168	C44	75	0	0	0	0	-	0	NA	NA	NA	-	11.6	11.3	11.7	11.4	11.5	11	12	10.4	11.3	11.1	11.4	12	10.4	10.8	11.4	11.1	10.5	10.4	10.2	8.8	11.9	11.2	12.1	12.4
THC0290_0631	766042	767274	1	CDS	NA	clpX	THC0290_v2_0677	clpX	S14 family, ATP-dependent Clp protease ATP-binding subunit	NA	3371	A601	B183	C44	1233	1	1	0	0	THC0290_N_0460	NA	NA	NA	NA	-	13.3	13.3	13.2	13.2	13.1	13.1	13	12.6	12.1	11.9	13.3	13.3	11.6	11.1	11.9	11.9	11.1	11.3	10.9	10.5	13.4	13.3	13.6	13.8
THC0290_N_0460	767146	767422	-1	Region	indep	Rfp32			new transcription segment	NA	1619	A1768	B546	C143	277	2	1	1	0	THC0290_0631;THC0290_N_0461	0	NA	NA	NA	-	5.5	4.9	5.7	6.2	6.5	7.4	6.8	10.1	8.6	9.1	5.4	4.7	8.7	7.7	7.6	6.3	8.6	9.1	11.4	9.6	5.3	5.4	5	5
THC0290_N_0461	767275	767487	1	Region	intra				new transcription segment	NA(CDS:THC0290_0632);clpX(CDS:THC0290_0631)	2748	A279	B102	C28	213	1	1	0	0	THC0290_N_0460	0	NA	NA	NA	-	11.2	11	10.8	10.9	11.1	11.5	11	12.2	10.7	11.2	10.9	10.9	10.3	9.6	10.3	10.1	9	10.2	11.9	9.6	11.3	11.1	11.3	11.7
THC0290_0632	767506	767874	1	CDS	NA		THC0290_v2_0678		Putative Sec-independent protein translocase (twin-arginine translocation protein)	NA	1238	A1745	B546	C143	369	0	0	0	0	-	NA	NA	NA	NA	-	11.5	11.3	10.9	11	11.1	11.2	11.3	12.3	11.3	12	11	11.1	13.9	13.8	12.6	12.4	15.1	15.3	14.3	14.1	11.3	11.7	11.5	11.8
THC0290_0633	767874	768443	1	CDS	NA		THC0290_v2_0679		Probable membrane-associated phospholipid phosphatase	NA	112	A1158	B395	C120	570	1	1	0	0	THC0290_N_0462	NA	NA	NA	NA	-	10.6	10.3	9.6	9.8	9.8	9.9	10.2	12.4	9.9	9.8	9.9	9.7	11.3	11.6	10.7	10.6	11.2	11.2	10.7	10.7	10.7	11	10.6	10.9
THC0290_N_0462	768085	768500	-1	Region	3prime				new transcription segment	NA(CDS:THC0290_0634)	1695	A1646	B540	C143	416	2	1	1	0	THC0290_0633;THC0290_N_0463	0	NA	NA	NA	-	6.6	6.5	6.7	6.9	7.5	7.7	7.9	9.6	8.3	8.3	6.5	6.8	8.2	9.2	7.8	7.8	8	7.7	7.8	8.8	6.7	6.7	6.2	6.4
THC0290_N_0463	768444	768788	1	Region	3prime				new transcription segment	NA(CDS:THC0290_0633)	113	A1158	B395	C120	345	2	1	1	0	THC0290_0634;THC0290_N_0462	0	NA	NA	NA	-	9.4	9	8.3	8.3	8.2	8	8.1	9.5	7.7	8.3	8.3	8.2	9.9	10	9.1	8.3	9.7	10	9	7.4	9.7	9.8	9.4	10.1
THC0290_0634	768501	769142	-1	CDS	NA		THC0290_v2_0680		O-methyltransferase	NA	1383	A1768	B546	C143	642	2	2	0	0	THC0290_N_0463;THC0290_N_0464	NA	NA	NA	NA	-	9.1	9.2	9	9.3	9.8	9.9	10.2	11	11.1	10.9	9	9.1	10.2	10.6	10.1	10	10.5	10.6	10.4	10.7	9.1	9	9.1	8.9
THC0290_N_0464	768887	769220	1	Region	indep	Rfp33			new transcription segment	NA	93	A1201	B413	C124	334	1	0	1	0	THC0290_0634	0	NA	NA	NA	-	7.9	7.5	6.6	6.6	6.3	6.7	6.5	8.1	6	7.4	7	6.6	7.9	8.4	8.2	7.5	8.2	7.6	5.6	6.9	8.2	8.3	8.1	9.4
THC0290_0635	769221	770264	1	CDS	NA	rlmN	THC0290_v2_0681	rlmN	Ribosomal RNA large subunit methyltransferase N	NA	2256	A947	B300	C82	1044	0	0	0	0	-	NA	NA	NA	NA	-	10.2	10.3	9.9	9.9	10.1	10.4	10.5	9.7	11.6	11.4	9.8	10	10.4	10.3	10.5	10.4	9.9	10.3	10.7	9.7	10.4	10.4	10.5	10.7
THC0290_N_0465	770297	771152	1	Region	intra				new transcription segment	rlmN(CDS:THC0290_0635)	1703	A1715	B546	C143	856	1	0	1	0	THC0290_0636	0	NA	NA	NA	-	6.2	6.3	5.6	6	6.9	7.5	7.5	9.3	9.6	9.9	5.9	5.2	9.2	8	7.5	6.8	8.1	9.8	11.2	9.1	6.3	6	7.5	7
THC0290_0636	770321	771202	-1	CDS	NA		THC0290_v2_0682		Probable lipoprotein precursor	NA	1541	A1765	B546	C143	882	1	1	0	0	THC0290_N_0465	NA	NA	NA	NA	-	7.6	7.8	9.3	9.5	10.7	10.7	10.9	10.4	13.2	12.4	8.9	9.2	12.6	12.8	13	12.9	13.8	13.8	15.1	14.8	7.4	7.3	6.8	6.5
THC0290_0637	771307	772284	1	CDS	NA		THC0290_v2_0683		Polyprenyl synthetase	NA	1996	A1448	B502	C142	978	0	0	0	0	-	NA	NA	NA	NA	-	9.7	9.6	9.8	9.9	10	9.7	10	8.6	10.7	10.2	9.9	9.7	10.8	11.1	10.1	9.6	11.2	11.2	10.8	11.1	9.5	9.8	9.9	10
THC0290_0638	772469	773029	1	CDS	NA		THC0290_v2_0684		RNA polymerase ECF-type sigma factor	NA	1029	A1710	B546	C143	561	0	0	0	0	-	NA	NA	NA	NA	-	7.3	7.3	7.6	7.6	8	8	8.4	9.3	8.9	8.7	7.2	7.3	8.3	8.6	8.4	8.3	8.4	8.2	9.8	10.1	7.3	7.4	7.1	7.4
THC0290_0639	773016	773693	1	CDS	NA		THC0290_v2_0685		Probable transmembrane protein of unknown function, putative anti ECF-type sigma factor	NA	1030	A1710	B546	C143	678	0	0	0	0	-	NA	NA	NA	NA	-	7.6	7.6	7.9	7.8	8.3	8.2	8.8	8.9	8.1	9	7.4	7.5	8.8	9.5	8.8	8.6	9.6	8.6	9.5	10.4	7.5	7.5	7.7	7.9
THC0290_0640	773726	774790	1	CDS	NA		THC0290_v2_0686		Protein of unknown function precursor, putative sensor of anti-sigma and ECF sigma factor	NA	4380	A1783	B548	C143	1065	0	0	0	0	-	NA	NA	NA	NA	-	8.5	8.5	9.1	9	9.9	9.4	9.6	9.8	8.9	9.2	8.4	8.8	9.4	9.6	9.3	9.4	8.2	8.8	9	9.6	8.4	8.7	8.9	9.1
THC0290_0641	774935	776176	1	CDS	NA		THC0290_v2_0687		Protein of unknown function precursor	NA	4000	A1162	B397	C120	1242	0	0	0	0	-	NA	NA	NA	NA	-	10.4	10.3	9.6	9.6	9.1	8.9	8.9	8.9	9.5	9.6	9.6	9.7	9.9	10.4	9.5	9.2	10.2	9.2	9	10.4	10	10.5	10.9	10.9
THC0290_0642	776332	777606	1	CDS	NA		THC0290_v2_0688		Protein of unknown function precursor	NA	1070	A1767	B546	C143	1275	0	0	0	0	-	NA	NA	NA	NA	-	7.4	7.3	7	7.3	8	8.1	8.9	10	10	9.7	6.8	6.9	11.2	12.3	10.2	10.2	11.4	11.1	10.2	10.1	7.2	7.4	8.2	8.4
THC0290_N_0466	777700	777762	1	Region	5prime				new transcription segment	dnaG(CDS:THC0290_0643)	3120	A553	B182	C44	63	0	0	0	0	-	0	NA	NA	NA	-	8.9	8.6	8.1	7.9	7.2	7.3	7	7.7	8.2	8	8.5	8.5	7.8	8.8	7.1	7.2	3.9	4	3.9	3.9	9.2	8.9	9.1	9.2
THC0290_0643	777763	779748	1	CDS	NA	dnaG	THC0290_v2_0689	dnaG	DNA primase	NA	2856	A537	B180	C44	1986	1	1	0	0	THC0290_N_0467	NA	NA	NA	NA	-	9.9	9.8	9.2	9.2	8.4	8.3	8.3	8.6	8.9	8.8	9.7	9.6	8.2	8.3	8	8.2	8.4	7.7	6.9	9.1	9.9	9.9	10.3	10.1
THC0290_N_0467	779421	779788	-1	Region	3prime				new transcription segment	NA(CDS:THC0290_0644)	1420	A1768	B546	C143	368	1	0	1	0	THC0290_0643	0	NA	NA	NA	-	6.1	6.2	6.6	7.1	9	9.3	9.9	11.4	10.4	10.4	6.3	6.4	11.7	11.1	11.2	11.2	11	11.2	11.2	11.2	6.2	6.2	5.6	6.3
THC0290_N_0468	779749	779897	1	Region	3prime				new transcription segment	dnaG(CDS:THC0290_0643)	3843	A760	B225	C62	149	1	0	1	0	THC0290_0644	0	NA	NA	NA	-	7.8	8	6.8	7.2	6.3	7.6	6.7	8.1	8	8.8	7.5	6.9	9.3	6.9	5.9	6.9	7.6	8.1	9.5	9.4	8	8.1	8.1	8.2
THC0290_0644	779789	780418	-1	CDS	NA		THC0290_v2_0690		Two-component system response regulatory protein, LuxR family	NA	1421	A1768	B546	C143	630	1	1	0	0	THC0290_N_0468	NA	NA	NA	NA	-	8	8	9	9.4	11.3	11.4	11.9	12.9	13.6	13.5	8.7	8.8	13.9	13.8	13.4	13.4	13.6	14	14.3	13.9	8	8.1	7.9	7.9
THC0290_N_0469	780456	780505	-1	Region	intra				new transcription segment	NA(CDS:THC0290_0644);nadE(CDS:THC0290_0645)	3032	A594	B183	C44	50	0	0	0	0	-	0	NA	NA	NA	-	6.3	6.4	6.7	6.1	6.5	6.1	5.9	6.7	6.6	4.5	6.6	7	3.9	3.9	5	5.7	3.9	3.9	3.9	3.9	6.6	6.9	6.2	5.7
THC0290_0645	780506	781312	-1	CDS	NA	nadE	THC0290_v2_0691	nadE	NH(3)-dependent NAD(+) synthetase	NA	3866	A1438	B500	C142	807	0	0	0	0	-	NA	NA	NA	NA	-	10	10.2	9.9	10.1	9.9	9.6	9.6	8.7	10.1	9.8	10.1	10.1	9.9	10.4	9.6	9.4	10.3	10.2	10.4	11	10.1	10	10.2	9.8
THC0290_flavo-1_0033	781364	781443	-1	misc_RNA	NA				Flavo-1 RNA	NA	1322	A1768	B546	C143	80	1	1	0	0	THC0290_N_0470	NA	NA	NA	NA	-	4.7	4.6	4.6	4.3	4.8	5.2	4.6	8.5	7	6.4	4.5	4.6	7.1	8.4	7.1	6.4	9.8	8.5	8.8	10.2	3.9	4.9	4.2	4.1
THC0290_N_0470	781374	781453	1	Region	5prime				new transcription segment	gldB(CDS:THC0290_0646)	1151	A1767	B546	C143	80	1	0	0	1	THC0290_flavo-1_0033	0	NA	NA	NA	-	9.2	9.1	8.7	8.8	9.2	10.3	9.9	10.3	10.1	11.3	8.6	8.6	12	11.5	10.7	10.6	11.6	12.3	12.1	11.4	9.1	9.3	9.2	9.7
THC0290_0646	781454	782410	1	CDS	NA	gldB	THC0290_v2_0692	gldB	Gliding motility lipoprotein precursor GldB	NA	669	A1364	B469	C136	957	0	0	0	0	-	NA	NA	NA	NA	-	10.6	10.5	10.2	10.1	10.6	10.6	10.9	11.2	10.9	11	10.1	10	11.5	11.7	11.3	11.5	11.1	11.3	11.2	10.5	10.4	10.7	10.8	10.6
THC0290_N_0471	782411	782492	1	Region	intra				new transcription segment	gldC(CDS:THC0290_0647);gldB(CDS:THC0290_0646)	670	A1364	B469	C136	82	0	0	0	0	-	0	NA	NA	NA	-	10.1	10.4	10.2	10.2	10.6	10.6	10.8	10.8	10.9	11	10.2	10.1	11.5	11.3	11.4	11.4	10.7	11	10.5	9.9	10.4	10.8	10.6	10.6
THC0290_0647	782493	782816	1	CDS	NA	gldC	THC0290_v2_0693	gldC	Gliding motility protein GldC	NA	671	A1364	B469	C136	324	0	0	0	0	-	NA	NA	NA	NA	-	10.8	11	10.6	10.7	11	11.4	11.2	11.4	11.4	11.5	10.6	10.5	11.9	11.9	11.7	11.8	11.2	11.3	11.3	11.2	10.9	11.2	11.2	11
THC0290_N_0472	782817	782865	1	Region	3prime				new transcription segment	gldC(CDS:THC0290_0647)	152	A1354	B468	C136	49	0	0	0	0	-	0	NA	NA	NA	-	6.5	6	5.5	5.6	5.7	6.8	6.3	7.2	6.9	7	5.8	5.1	8.3	7.8	7.4	6.8	5.3	5.6	4.1	10.2	6.8	6.3	5.5	6.3
THC0290_0648	782935	783552	-1	CDS	NA	engB	THC0290_v2_0694	engB	Probable GTP-binding protein EngB	NA	2698	A462	B168	C44	618	0	0	0	0	-	NA	NA	NA	NA	-	10.5	10.4	10	10.1	10	10.4	10.3	10.5	10.4	10.4	10.1	10.1	9.9	9.8	10	9.8	9.1	9.5	9.5	7.7	10.6	10.6	10.7	11
THC0290_N_0473	783553	783609	-1	Region	intra				new transcription segment	engB(CDS:THC0290_0648);pcbD(CDS:THC0290_0649)	2699	A462	B168	C44	57	0	0	0	0	-	0	NA	NA	NA	-	10.6	10.5	10.2	10	10	10.1	10.3	10.7	10.6	10.6	10.1	10.3	10.2	10.1	10.3	10.1	9.9	9.9	9.6	7.3	10.6	10.4	10.6	10.7
THC0290_0649	783610	784374	-1	CDS	NA	pcbD	THC0290_v2_0695	pcbD	Probable 2-hydroxy-6-oxo-6-phenylhexa-2,4-dienoic acid hydrolase	NA	2223	A966	B307	C84	765	0	0	0	0	-	NA	NA	NA	NA	-	10.5	10.6	10.2	10	10.1	10.5	10.4	10.9	10.9	11.3	10.3	10.2	11	10.8	10.6	10.5	10.7	10.5	10.7	10.8	10.6	10.7	10.7	10.8
THC0290_0650	784611	785084	1	CDS	NA	mraZ	THC0290_v2_0696	mraZ	Protein MraZ	NA	1027	A1711	B546	C143	474	0	0	0	0	-	NA	NA	NA	NA	-	11.1	11.2	10.9	10.9	11.5	10.9	11.7	12.1	12	11.9	10.9	10.9	11.5	11.7	11.5	11.4	11.8	12.3	12.8	13.8	11	11	11.2	11.2
THC0290_0651	785092	785967	1	CDS	NA	mraW	THC0290_v2_0697	mraW	S-adenosyl-methyltransferase MraW	NA	1025	A1711	B546	C143	876	0	0	0	0	-	NA	NA	NA	NA	-	11.1	11.1	10.6	10.8	11.3	10.8	11.5	12.2	12.1	11.8	10.6	10.7	11.3	11.7	11.5	11.5	11.3	10.9	12	12.3	10.8	11.2	11.3	11.2
THC0290_0652	785967	786308	1	CDS	NA		THC0290_v2_0698		Probable transmembrane protein of unknown function	NA	290	A1192	B409	C123	342	0	0	0	0	-	NA	NA	NA	NA	-	10.7	10.6	10	10.1	10.7	10.5	11.1	11.7	11.4	11.4	10	10.2	11.1	11.4	11.3	10.9	10.4	10.5	10.7	10.7	10.4	10.5	10.7	10.8
THC0290_0653	786299	788302	1	CDS	NA	ftsI	THC0290_v2_0699	ftsI	Peptidoglycan glycosyltransferase FtsI	NA	291	A1192	B409	C123	2004	0	0	0	0	-	NA	NA	NA	NA	-	10.7	10.5	10.3	10.2	10.9	10.9	11.5	11.1	11.4	11.3	10.5	10.3	11.2	11.4	11.3	11.2	10.7	10.7	10.5	9.7	10.8	10.9	10.7	10.9
THC0290_0654	788304	789764	1	CDS	NA	murE	THC0290_v2_0700	murE	UDP-N-acetylmuramoylalanyl-D-glutamate--2,6-diaminopimelate ligase	NA	2880	A467	B169	C44	1461	0	0	0	0	-	NA	NA	NA	NA	-	11.3	11.4	11.1	11.1	11.3	11.1	11.8	11.5	11.4	11.3	11.1	11.2	10.9	10.7	11.1	10.9	10.3	10.2	10	9.2	11.4	11.1	11.2	11.4
THC0290_N_0474	789765	789827	1	Region	intra				new transcription segment	mraY(CDS:THC0290_0655);murE(CDS:THC0290_0654)	2874	A465	B169	C44	63	0	0	0	0	-	0	NA	NA	NA	-	7.5	7.2	6.8	6.8	7.2	7.3	7.8	7.6	7.2	8.3	6.9	7	7.2	3.9	7.6	7.5	3.9	4	3.9	3.9	7.6	7.3	7.2	7.3
THC0290_0655	789828	791057	1	CDS	NA	mraY	THC0290_v2_0701	mraY	Phospho-N-acetylmuramoyl-pentapeptide-transferase	NA	2881	A467	B169	C44	1230	1	1	0	0	THC0290_N_0475	NA	NA	NA	NA	-	11.6	11.4	11.1	11.3	11.8	11.2	12.1	11.4	11.8	11.6	11.1	11	10.8	10.7	11.2	11.4	10.9	10.6	10.4	10.3	11.3	11.3	11.4	11.6
THC0290_N_0475	790755	790883	-1	Region	indep	Rfp34			new transcription segment	NA	1640	A1769	B546	C143	129	1	0	1	0	THC0290_0655	0	NA	NA	NA	-	3.9	3.9	4.6	3.9	5	7.8	5.3	7.9	7.2	9.6	4.4	4.2	10.7	8.7	7.3	5.7	8.9	11.2	11.9	9.6	3.9	4.3	4.3	3.9
THC0290_0656	791059	792390	1	CDS	NA	murD	THC0290_v2_0702	murD	UDP-N-acetylmuramoylalanine--D-glutamate ligase	NA	2879	A467	B169	C44	1332	0	0	0	0	-	NA	NA	NA	NA	-	11.8	11.7	11.4	11.4	11.9	11.7	11.8	11.6	11.3	11.4	11.4	11.4	10.6	10.4	11	11	10.2	10.4	10.1	9.5	11.6	11.7	12	12.1
THC0290_N_0476	792391	792468	1	Region	intra				new transcription segment	ftsW(CDS:THC0290_0657);murD(CDS:THC0290_0656)	2903	A475	B170	C44	78	0	0	0	0	-	0	NA	NA	NA	-	12.8	13	13	12.9	13.3	13.1	13.3	13.2	12.7	12.6	12.6	12.8	11.8	11	12.1	11.8	11.5	11.5	11.6	11	13.2	13.1	13.6	13.7
THC0290_0657	792469	793755	1	CDS	NA	ftsW	THC0290_v2_0703	ftsW	Cell division protein FtsW	NA	2882	A468	B169	C44	1287	0	0	0	0	-	NA	NA	NA	NA	-	11.7	11.6	11.2	11.2	11.4	11.4	11.9	11.8	11.5	11.5	11.4	11.3	10.6	10.5	11.1	11.1	10.5	10.8	11.4	11.2	11.6	11.5	12	12.2
THC0290_N_0477	793756	793796	1	Region	intra				new transcription segment	murG(CDS:THC0290_0658);ftsW(CDS:THC0290_0657)	-1	NA	NA	NA	41	0	0	0	0	-	0	NA	NA	NA	-	NA	NA	NA	NA	NA	NA	NA	NA	NA	NA	NA	NA	NA	NA	NA	NA	NA	NA	NA	NA	NA	NA	NA	NA
THC0290_0658	793797	794900	1	CDS	NA	murG	THC0290_v2_0704	murG	Undecaprenyldiphospho-muramoylpentapeptide beta-N-acetylglucosaminyltransferase	NA	2877	A467	B169	C44	1104	0	0	0	0	-	NA	NA	NA	NA	-	10.7	10.6	10.1	10.1	10.4	10	10.6	9.4	10	9.9	10.3	10.3	9.3	9.2	9.8	9.8	8.8	9	8.7	8.4	10.5	10.6	10.5	10.7
THC0290_N_0478	794901	794953	1	Region	intra				new transcription segment	murC(CDS:THC0290_0659);murG(CDS:THC0290_0658)	2905	A477	B170	C44	53	0	0	0	0	-	0	NA	NA	NA	-	12.1	12.1	12	11.6	12	12.1	12.1	11.7	11.4	12.2	12	12	10.7	9.8	10.8	11.2	9.8	10.8	11.1	9.6	12	12.1	12	12
THC0290_0659	794954	796300	1	CDS	NA	murC	THC0290_v2_0705	murC	UDP-N-acetylmuramate--L-alanine ligase	NA	2878	A467	B169	C44	1347	0	0	0	0	-	NA	NA	NA	NA	-	11.3	11.4	11.1	11.2	11.4	11	11.7	11	11.3	11	11.3	11.2	9.9	9.4	10.5	10.5	9.9	9.9	10.1	10.1	11.5	11.2	11.2	11.5
THC0290_0660	796290	797012	1	CDS	NA	ftsQ	THC0290_v2_0706	ftsQ	Cell division protein FtsQ	NA	375	A1258	B422	C125	723	0	0	0	0	-	NA	NA	NA	NA	-	11.6	11.5	11.2	11.3	11.8	11.5	11.7	12.2	11.7	11.5	11.6	11.4	10.6	11	11.2	11.3	10.7	10.8	11.6	11.3	11.8	11.9	11.3	11.5
THC0290_0661	797014	798414	1	CDS	NA	ftsA	THC0290_v2_0707	ftsA	Cell division protein FtsA	NA	2517	A614	B183	C44	1401	0	0	0	0	-	NA	NA	NA	NA	-	13	13.1	12.6	12.6	12.9	13.2	13	12	12.5	12.6	12.7	12.7	11.9	11.4	11.9	12	11.6	11.6	11.6	11.5	13.1	13.3	12.8	13.2
THC0290_N_0479	798415	798460	1	Region	intra				new transcription segment	ftsZ(CDS:THC0290_0662);ftsA(CDS:THC0290_0661)	-1	NA	NA	NA	46	0	0	0	0	-	0	NA	NA	NA	-	NA	NA	NA	NA	NA	NA	NA	NA	NA	NA	NA	NA	NA	NA	NA	NA	NA	NA	NA	NA	NA	NA	NA	NA
THC0290_0662	798461	800443	1	CDS	NA	ftsZ	THC0290_v2_0708	ftsZ	Cell division protein FtsZ	NA	3328	A605	B183	C44	1983	0	0	0	0	-	NA	NA	NA	NA	-	13.7	13.5	13.1	13.1	13.3	13.5	13.5	12	12.7	12.6	13.5	13.4	11.7	10.9	12.4	12.2	11.9	12	11.5	11.2	13.8	13.3	13.6	13.8
THC0290_N_0480	800444	800556	1	Region	intra				new transcription segment	NA(Region:THC0290_N_0481);ftsZ(CDS:THC0290_0662)	4467	A748	B217	C57	113	0	0	0	0	-	0	NA	NA	NA	-	10.8	10.4	10.1	9.8	9.9	10.7	11	10	10.6	10.4	10.4	10.2	10.6	10.2	10.2	10.2	11.5	10.7	11.1	10.4	10.9	10.4	10.5	10.8
THC0290_N_0481	800558	800772	1	Region	5prime				new transcription segment	NA(CDS:THC0290_0663)	3944	A901	B280	C77	215	1	0	0	1	THC0290_flavo-1_0034	0	NA	NA	NA	-	11.2	11	10.6	10.5	10.7	11.7	11.3	10.7	11.3	11.5	10.8	10.8	11.4	11	10.9	10.7	10.7	11.3	11.6	10.9	11.6	11	11.3	11.6
THC0290_flavo-1_0034	800558	800700	-1	misc_RNA	NA				Flavo-1 RNA	NA	1204	A1747	B546	C143	143	1	1	0	0	THC0290_N_0481	NA	NA	NA	NA	-	4.7	5	4.4	5.2	5.4	4.8	5.4	4.3	6.9	5.9	4.3	4.6	4.4	8.5	7.1	5.8	9.7	7.6	8.8	9.2	5.5	4.1	5	4.8
THC0290_0663	800773	801222	1	CDS	NA		THC0290_v2_0709		Protein of unknown function	NA	3542	A604	B183	C44	450	0	0	0	0	-	NA	NA	NA	NA	-	13.9	13.9	13.9	13.7	13.6	14.2	13.6	12.7	13.3	13.3	14	14	13.3	12.3	13.1	13	12.7	12.8	12.8	12.3	14.2	14	14.2	14.5
THC0290_N_0482	801223	801292	1	Region	intra				new transcription segment	NA(tRNA:THC0290_tRNA_0013);NA(CDS:THC0290_0663)	2298	A917	B284	C77	70	0	0	0	0	-	0	NA	NA	NA	-	7.9	7.9	7.9	7.7	7.6	8.1	8.2	8.6	8.3	8.2	7.6	7.6	8	6.7	8.3	7.7	7.8	7.2	8	3.9	8.2	7.8	8.3	8.8
THC0290_tRNA_0013	801293	801366	1	tRNA	NA				transfer RNA-Arg	NA	1015	A1726	B546	C143	74	0	0	0	0	-	NA	NA	NA	NA	-	9.4	9.2	8.5	8.7	9.5	9.5	9.5	10.8	9.7	10.2	8.8	8.8	9.7	9.6	9.2	9.1	9.9	10.3	11.6	11.2	9.8	9.4	9.2	9.4
THC0290_0664	801393	802211	1	CDS	NA		THC0290_v2_0710		Probable transmembrane protein of unknown function	NA	2428	A175	B63	C19	819	1	1	0	0	THC0290_N_0483	NA	NA	NA	NA	-	9.3	8.9	8.3	8.3	8.7	9.1	8.9	9.7	7.9	7.9	8.5	8.4	7.8	7.2	7.9	8	4.3	7.8	3.9	5.7	9.1	9.7	8.6	9
THC0290_N_0483	801868	802199	-1	Region	3prime				new transcription segment	rpe(CDS:THC0290_0665)	2416	A780	B237	C67	332	1	0	1	0	THC0290_0664	0	NA	NA	NA	-	8	7.9	7.6	7.4	7.4	7.6	7.3	8.1	6.3	6.5	7.6	7.3	7.9	7.3	5.3	5.7	5.7	5.2	6.4	3.9	8.3	7.9	8.1	8
THC0290_0665	802200	802859	-1	CDS	NA	rpe	THC0290_v2_0711	rpe	Ribulose-phosphate 3-epimerase	NA	3961	A26	B13	C6	660	1	1	0	0	THC0290_N_0484	NA	NA	NA	NA	-	11.7	11.8	11.7	11.5	11.3	11.7	11.6	10.2	11.9	11.7	11.8	11.4	11.8	11.7	11.3	11	12	11.9	11.6	11.6	12	11.1	12.1	11.8
THC0290_N_0484	802212	803155	1	Region	3prime				new transcription segment	NA(CDS:THC0290_0664)	329	A1248	B419	C125	944	1	0	1	0	THC0290_0665	0	NA	NA	NA	-	7.1	6.8	6.6	7	7.3	7.2	7.8	7.7	7.9	7.6	6.9	6.7	7.1	7.4	7.2	7.1	7.3	6.6	7.2	6.7	7.1	7.3	6.8	7.4
THC0290_flavo-1_0035	802956	803040	1	misc_RNA	NA				Flavo-1 RNA	NA	1311	A1747	B546	C143	85	0	0	0	0	-	NA	NA	NA	NA	-	8.6	8.7	8.2	8.8	9	8.6	9.5	7.4	10.6	9.7	8.4	8.5	10	11.9	10	10.2	13.1	11.4	12.4	14.2	8.8	8.3	8.9	8.8
THC0290_N_0485	803148	803240	-1	Region	3prime				new transcription segment	rpoD(CDS:THC0290_0666)	437	A1242	B419	C125	93	0	0	0	0	-	0	NA	NA	NA	-	9.1	8.8	8.1	8	8	8.8	9.3	10.4	9.8	10.3	8.3	8	10.3	9.2	9.4	9	7.7	9	11.6	11.4	9.3	9	10.3	10.4
THC0290_N_0486	803241	803318	-1	Region	indep	Rfp35			new transcription segment	NA	1061	A1641	B540	C143	78	0	0	0	0	-	0	NA	NA	NA	-	9.6	9.4	10.3	10.2	10	10.7	11.4	11.8	12	12.8	10	10	13	11.7	12.5	11.7	12.3	12.6	15	11.9	10.2	9.8	10.5	10.7
THC0290_0666	803319	804182	-1	CDS	NA	rpoD	THC0290_v2_0713	rpoD	RNA polymerase sigma-70 factor RpoD	NA	293	A1641	B540	C143	864	0	0	0	0	-	NA	NA	NA	NA	-	12.3	12.2	12.2	12.2	12.4	12.5	12.9	11.8	13.2	13	12.1	12.1	13.3	13	13.5	13.1	13	12.9	13.8	13.4	12.3	12.2	12.6	12.7
THC0290_0667	804310	804894	1	CDS	NA		THC0290_v2_0714		Protein of unknown function	NA	1276	A1747	B546	C143	585	0	0	0	0	-	NA	NA	NA	NA	-	9	8.8	8.9	8.8	8.7	8.3	8.6	9.3	9.5	9.3	8.9	8.9	10.1	10.8	9.7	9.9	10.8	10.6	10.6	10.6	8.7	9.1	8.4	8.3
THC0290_N_0487	804893	804980	-1	Region	3prime				new transcription segment	pnp(CDS:THC0290_0668)	2262	A942	B298	C82	88	1	1	0	0	THC0290_N_0488	0	NA	NA	NA	-	5.8	5.5	4.8	4.8	4.8	5.4	6.7	5.3	7.5	8.5	4.3	4.7	7.2	4.1	6.8	5.2	5.3	7.1	8.6	4.1	5.5	4.7	5.4	6.2
THC0290_N_0488	804895	804941	1	Region	3prime				new transcription segment	NA(CDS:THC0290_0667)	-1	NA	NA	NA	47	1	1	0	0	THC0290_N_0487	0	NA	NA	NA	-	NA	NA	NA	NA	NA	NA	NA	NA	NA	NA	NA	NA	NA	NA	NA	NA	NA	NA	NA	NA	NA	NA	NA	NA
THC0290_0668	804981	807116	-1	CDS	NA	pnp	THC0290_v2_0715	pnp	Polyribonucleotide nucleotidyltransferase	NA	3177	A586	B183	C44	2136	0	0	0	0	-	NA	NA	NA	NA	-	13.1	13.4	12.3	12.4	12.1	12.1	12.8	11.3	13	12.6	12.3	11.9	10.8	10.9	11.6	11.7	10.7	10.9	10.6	10.9	13.3	12.8	13.7	13.8
THC0290_N_0489	807117	807316	-1	Region	intra				new transcription segment	pnp(CDS:THC0290_0668);rpsO(CDS:THC0290_0669)	2301	A809	B244	C67	200	0	0	0	0	-	0	NA	NA	NA	-	13.6	13.9	13.5	13.2	13.1	13.5	14	15	14.6	14.7	13	12.8	13.1	12.7	13.5	13.3	12.8	12.8	13.3	12.8	14	13.6	14.4	14.3
THC0290_N_0490	807317	807345	-1	Region	3prime				new transcription segment	rpsO(CDS:THC0290_0669)	-1	NA	NA	NA	29	0	0	0	0	-	0	NA	NA	NA	-	NA	NA	NA	NA	NA	NA	NA	NA	NA	NA	NA	NA	NA	NA	NA	NA	NA	NA	NA	NA	NA	NA	NA	NA
THC0290_0669	807346	807612	-1	CDS	NA	rpsO	THC0290_v2_0716	rpsO	30S ribosomal protein S15	NA	3952	A911	B282	C77	267	0	0	0	0	-	NA	NA	NA	NA	-	13.9	13.9	13.6	13.6	13.3	14.4	13	14.2	14	14.8	14	13.7	15.4	14	13.8	13.9	13.4	14.6	15	13.5	14.2	14.3	14.4	14.1
THC0290_N_0491	807613	807661	-1	Region	5prime				new transcription segment	rpsO(CDS:THC0290_0669)	-1	NA	NA	NA	49	0	0	0	0	-	0	NA	NA	NA	-	NA	NA	NA	NA	NA	NA	NA	NA	NA	NA	NA	NA	NA	NA	NA	NA	NA	NA	NA	NA	NA	NA	NA	NA
THC0290_0670	807710	809137	-1	CDS	NA		THC0290_v2_0717		Probable nucleoside-diphosphate-sugar epimerase	NA	1786	A1762	B546	C143	1428	0	0	0	0	-	NA	NA	NA	NA	-	9.2	9.3	9.7	9.9	10.4	10.1	10.4	10.7	11.2	10.7	9.7	9.9	10.9	11.1	11.5	11.5	11.1	11	10.8	11.4	9.2	8.7	9.2	8.8
THC0290_0671	809155	810447	-1	CDS	NA	phrB3	THC0290_v2_0718	phrB3	Deoxyribodipyrimidine photolyase PhrB3	NA	1193	A1742	B546	C143	1293	0	0	0	0	-	NA	NA	NA	NA	-	8.4	8.1	7.9	7.7	8	8.4	8.8	9.5	10.2	10.1	7.9	8	10	9.6	10.9	11.1	10	10.5	10.9	10.5	8.2	8	8.2	8.4
THC0290_0672	810444	812006	-1	CDS	NA		THC0290_v2_0719		Protein of unknown function related to deoxyribodipyrimidine photolyase	NA	1194	A1742	B546	C143	1563	0	0	0	0	-	NA	NA	NA	NA	-	8.6	8.4	8	7.9	8.2	8.2	9.1	9.2	10.7	9.9	8	8.1	10.6	10.4	11.5	11.7	10.8	10.8	10.6	11	8.5	8.2	8.4	8.7
THC0290_N_0492	812007	812083	-1	Region	intra				new transcription segment	NA(CDS:THC0290_0672);phrB2(CDS:THC0290_0673)	1399	A1747	B546	C143	77	0	0	0	0	-	0	NA	NA	NA	-	9.6	9.5	8.7	9.4	9.3	9.2	9.9	9.5	11.3	11.2	9	9	11.7	11.9	12	11.8	12.9	12	12.4	13.8	9.8	9.2	9.8	9.9
THC0290_0673	812084	813592	-1	CDS	NA	phrB2	THC0290_v2_0720	phrB2	Deoxyribodipyrimidine photolyase PhrB2	NA	1400	A1763	B546	C143	1509	0	0	0	0	-	NA	NA	NA	NA	-	8.9	8.8	8.3	8.3	8.5	8.3	9.1	9.5	11.2	10.7	8.3	8.3	11.3	11.2	11.8	11.8	11.3	11.1	11.3	11.3	9.1	8.7	9	9.3
THC0290_0674	813604	814233	-1	CDS	NA		THC0290_v2_0721		Protein of unknown function	NA	1401	A1763	B546	C143	630	0	0	0	0	-	NA	NA	NA	NA	-	9.2	9	8.4	8.5	8.7	8.6	9.1	9.5	11.2	10.7	8.5	8.5	12.2	12.2	12.5	12.4	12	12	11.7	11.6	9.2	9	9.3	9.8
THC0290_N_0493	814234	814273	-1	Region	intra				new transcription segment	NA(CDS:THC0290_0674);NA(CDS:THC0290_0675)	-1	NA	NA	NA	40	0	0	0	0	-	0	NA	NA	NA	-	NA	NA	NA	NA	NA	NA	NA	NA	NA	NA	NA	NA	NA	NA	NA	NA	NA	NA	NA	NA	NA	NA	NA	NA
THC0290_0675	814274	814693	-1	CDS	NA		THC0290_v2_0722		Protein of unknown function	NA	1402	A1763	B546	C143	420	0	0	0	0	-	NA	NA	NA	NA	-	9.3	9.2	8.6	8.7	8.9	8.9	9.4	8.5	11.2	10.7	8.6	8.7	12.8	13	13.1	12.9	13.4	13	12.7	13	9.4	9.2	9.8	9.9
THC0290_0676	814714	815004	-1	CDS	NA		THC0290_v2_0723		Protein of unknown function	NA	1403	A1763	B546	C143	291	0	0	0	0	-	NA	NA	NA	NA	-	9.3	9.7	8.8	9.2	9.2	8.8	10	9	11.8	11.3	9	9.2	13.1	13.4	13	12.8	13.5	13.6	13.4	13.6	9.6	9.4	9.9	10.2
THC0290_N_0494	815092	815143	-1	Region	3prime				new transcription segment	NA(CDS:THC0290_0677)	-1	NA	NA	NA	52	0	0	0	0	-	0	NA	NA	NA	-	NA	NA	NA	NA	NA	NA	NA	NA	NA	NA	NA	NA	NA	NA	NA	NA	NA	NA	NA	NA	NA	NA	NA	NA
THC0290_0677	815144	815599	-1	CDS	NA		THC0290_v2_0724		Protein of unknown function	NA	668	A1364	B469	C136	456	0	0	0	0	-	NA	NA	NA	NA	-	11.6	11.6	11.8	11.7	12	11.9	12.3	13.5	12	12.1	11.5	11.6	12.6	12.3	12.5	12.5	11.9	12.2	12.4	11.9	11.6	11.9	11.8	11.6
THC0290_0678	815673	816212	1	CDS	NA		THC0290_v2_0725		Probable transmembrane protein of unknown function	NA	2144	A1694	B546	C143	540	0	0	0	0	-	NA	NA	NA	NA	-	7.5	7.3	7.3	7.6	7.6	8.2	7.9	9.7	8.6	8.7	7.5	7	8.8	8.9	8	7.8	8.9	8.9	9.3	9.1	7	7.8	6.9	7.1
THC0290_0679	816190	816630	1	CDS	NA		THC0290_v2_0726		Probable transmembrane protein of unknown function	NA	15	A85	B40	C15	441	0	0	0	0	-	NA	NA	NA	NA	-	6.6	6.8	6.7	6.8	7.2	7.7	7.4	9.3	7.7	7.3	6.5	6.6	6.6	4.7	6.4	6.9	5.1	4.4	8.3	5.1	6.6	6.8	6.3	6.6
THC0290_0680	816720	817085	1	CDS	NA		THC0290_v2_0727		Protein of unknown function	NA	1415	A1768	B546	C143	366	0	0	0	0	-	NA	NA	NA	NA	-	8.7	8.6	8.8	8.8	9.9	9.8	10.9	12	10.9	11	8.7	8.7	12.5	12.6	12.1	12	12.5	12.4	12.3	11.8	8.7	9.1	9	9.1
THC0290_N_0495	817086	817137	1	Region	intra				new transcription segment	NA(CDS:THC0290_0681);NA(CDS:THC0290_0680)	970	A1674	B543	C143	52	0	0	0	0	-	0	NA	NA	NA	-	7.9	7.7	8.8	9	10.4	9.7	11.1	12.1	12.1	11.4	7.8	8.2	11.4	12.2	12.2	11.9	12.3	11.5	11.9	11.9	7.8	8.1	9.1	8.8
THC0290_0681	817138	819144	1	CDS	NA		THC0290_v2_0728		Probable TonB-dependent outer membrane receptor precursor	NA	971	A1674	B543	C143	2007	0	0	0	0	-	NA	NA	NA	NA	-	9.9	10	10.9	11.4	12.5	12.2	13.3	13.6	13.8	13.6	9.3	9.7	12.8	13.6	13.8	13.4	13.7	13.2	13.5	13.9	9.7	9.6	11.3	11.2
THC0290_0682	819184	819525	1	CDS	NA		THC0290_v2_0729		Protein of unknown function	NA	968	A1674	B543	C143	342	0	0	0	0	-	NA	NA	NA	NA	-	9.7	10	11	11.2	12.3	12.2	12.9	13.7	13.3	13.5	9.7	10.1	13	13.4	13.5	13.6	13.2	13.1	13.7	13.6	9.6	9.9	11.1	10.8
THC0290_N_0496	819526	819557	1	Region	3prime				new transcription segment	NA(CDS:THC0290_0682)	-1	NA	NA	NA	32	0	0	0	0	-	0	NA	NA	NA	-	NA	NA	NA	NA	NA	NA	NA	NA	NA	NA	NA	NA	NA	NA	NA	NA	NA	NA	NA	NA	NA	NA	NA	NA
THC0290_0683	819616	819906	1	CDS	NA		THC0290_v2_0730		Hypothetical protein	NA	969	A1674	B543	C143	291	0	0	0	0	-	NA	NA	NA	NA	-	12	12	12.3	12.4	13.1	13.3	13.7	14.4	13.9	13.9	11.9	12	14.3	14	13.8	13.9	13.6	14	14.5	13.7	12	12.3	12.2	12.3
THC0290_N_0497	819907	819970	1	Region	intra				new transcription segment	sulP(CDS:THC0290_0684);NA(CDS:THC0290_0683)	974	A1674	B543	C143	64	0	0	0	0	-	0	NA	NA	NA	-	10.2	10.1	10.1	10.8	11.4	10.7	12.1	12.3	12.9	12.2	10.2	10.2	12.1	12.4	13.2	13.3	12.9	12.5	12	12.4	9.8	10	10.6	10.7
THC0290_0684	819971	821572	1	CDS	NA	sulP	THC0290_v2_0731	sulP	Probable sulfate permease	NA	975	A1674	B543	C143	1602	0	0	0	0	-	NA	NA	NA	NA	-	12.3	12.3	12.7	13.3	13.5	13.3	14.4	14.2	14.9	14.2	12.7	12.6	13.8	13.5	15.1	15	14.5	14.3	13.4	14.2	11.7	11.5	12.8	13
THC0290_0685	821595	822230	1	CDS	NA	cynT	THC0290_v2_0732	cynT	Carbonic anhydrase	NA	976	A1674	B543	C143	636	0	0	0	0	-	NA	NA	NA	NA	-	12.5	12.7	12.8	13.4	13.6	13.6	14.1	14.4	15	14.7	12.8	12.7	14.1	13.6	14.6	14.6	14.4	14.4	13.8	14.4	11.9	12	13.1	13.1
THC0290_N_0498	822231	822315	1	Region	3prime				new transcription segment	cynT(CDS:THC0290_0685)	972	A1674	B543	C143	85	0	0	0	0	-	0	NA	NA	NA	-	9.9	9.6	9.1	10	10	9.8	10.5	11.9	11.5	11.2	9.5	9.5	10.9	12.3	11.8	11.7	13.2	11.8	12.2	13.6	9.4	9.1	10.5	10.5
THC0290_0686	822316	823008	1	CDS	NA		THC0290_v2_0733		Transmembrane protein of unknown function, DedA family	NA	973	A1674	B543	C143	693	0	0	0	0	-	NA	NA	NA	NA	-	10.9	11	10.9	11.1	11.2	10.9	11.4	13	12	11.9	11	10.9	11.7	11.5	12.3	12.2	12.1	12.1	11.7	11.6	10.6	11	11.6	11.7
THC0290_N_0499	823009	823030	1	Region	3prime				new transcription segment	NA(CDS:THC0290_0686)	-1	NA	NA	NA	22	0	0	0	0	-	0	NA	NA	NA	-	NA	NA	NA	NA	NA	NA	NA	NA	NA	NA	NA	NA	NA	NA	NA	NA	NA	NA	NA	NA	NA	NA	NA	NA
THC0290_0687	823039	823653	-1	CDS	NA		THC0290_v2_0734		Protein of unknown function	NA	897	A1582	B531	C143	615	0	0	0	0	-	NA	NA	NA	NA	-	8.8	8.9	8.6	8.6	8.7	8.5	8.3	9.2	8.4	8.1	8.9	9	10.2	10.1	9.7	9.7	9.5	9.5	9.3	8.8	8.8	8.9	8.6	8.5
THC0290_0688	823730	824341	-1	CDS	NA		THC0290_v2_0735		Probable hydrolase (HAD superfamily)	NA	899	A1449	B502	C142	612	0	0	0	0	-	NA	NA	NA	NA	-	10.2	10.2	9.9	10.1	10.3	10.1	9.8	10.4	10.4	10.4	10.1	10.2	11.2	11.2	10.7	10.6	11.1	11.2	11.2	11.6	10.1	10	10.1	9.9
THC0290_0689	824334	825341	-1	CDS	NA	ribD	THC0290_v2_0736	ribD	Riboflavin biosynthesis protein RibD	NA	4007	A877	B270	C74	1008	0	0	0	0	-	NA	NA	NA	NA	-	9.9	9.9	9.6	9.4	9.3	9.5	9.4	8.4	10.1	9.8	9.7	9.6	9.6	10	9.3	9.2	10.2	9.5	10.2	10.8	10	10.1	9.8	9.9
THC0290_0690	825397	825891	1	CDS	NA	yjgM	THC0290_v2_0737	yjgM	Probable acetyltransferase YjgM	NA	3895	A1473	B507	C142	495	0	0	0	0	-	NA	NA	NA	NA	-	9.1	9.2	8.9	9	8.8	8.6	8.3	8.8	9.5	9.3	9.4	9.4	9.7	10.1	9.2	9.2	9.9	10.1	10.1	10.1	8.8	9.2	9.2	9.1
THC0290_0691	825894	826751	1	CDS	NA	hemK	THC0290_v2_0738	hemK	Methylase of polypeptide chain release factors	NA	3911	A42	B25	C13	858	1	1	0	0	THC0290_N_0500	NA	NA	NA	NA	-	8.9	8.9	8.8	8.8	8.6	8.4	8.1	8.4	8.9	8.7	9.1	9	8.4	9.1	8.5	8.5	8.2	7.8	8.1	7.8	8.9	8.8	9.2	9.1
THC0290_N_0500	826538	826787	-1	Region	3prime				new transcription segment	NA(CDS:THC0290_0692)	201	A1169	B401	C121	250	1	0	1	0	THC0290_0691	0	NA	NA	NA	-	8.1	8	7.6	7.6	7.3	7.7	7.7	7.7	7.9	7.3	7.5	6.9	7.7	6.9	5.8	7.2	8	8.5	9.3	7.4	7.8	8.2	7.3	7.5
THC0290_0692	826788	828029	-1	CDS	NA		THC0290_v2_0739		Probable ABC-type transport system, permease component	NA	1215	A1747	B546	C143	1242	0	0	0	0	-	NA	NA	NA	NA	-	9.2	9.2	9.2	9.3	9.7	9.7	9.7	10	10.7	10.2	8.7	8.8	10.6	10.7	10.1	10.1	11.5	11.6	13.8	14.4	9.3	9.5	9	9
THC0290_flavo-1_0036	828155	828230	-1	misc_RNA	NA				Flavo-1 RNA	NA	560	A1531	B521	C143	76	0	0	0	0	-	NA	NA	NA	NA	-	4.4	4.4	4.2	5	4.8	3.9	4.6	4	6.5	3.9	3.9	4.3	5.8	8.7	7	5.5	8.8	3.9	3.9	10.1	3.9	4.1	3.9	4.4
THC0290_N_0501	828254	828326	1	Region	5prime				new transcription segment	hisS(CDS:THC0290_0693)	743	A1577	B530	C143	73	0	0	0	0	-	0	NA	NA	NA	-	12.7	12.7	13.3	12.7	13.3	13.8	13.7	13.3	13.7	13.9	13	12.9	14.5	13.8	13.7	13.3	14.4	14.4	14.4	14.2	13	12.9	12.7	12.9
THC0290_0693	828327	829745	1	CDS	NA	hisS	THC0290_v2_0740	hisS	Histidine--tRNA ligase	NA	2254	A1505	B516	C143	1419	1	1	0	0	THC0290_N_0502	NA	NA	NA	NA	-	10.7	10.7	10.8	10.7	11.3	11.3	11.5	11.2	11.8	11.5	10.8	10.9	11.4	11.3	11.5	11.2	11.5	11.1	11.1	11.5	10.9	10.7	10.9	10.8
THC0290_N_0502	829692	829841	-1	Region	3prime				new transcription segment	xerD(CDS:THC0290_0694)	448	A1315	B453	C133	150	2	1	1	0	THC0290_0693;THC0290_N_0503	0	NA	NA	NA	-	5	4.1	4.3	4.5	4	5.6	4	7.7	3.9	6.5	4.2	4.1	3.9	3.9	3.9	3.9	5.8	4.3	10.2	3.9	5.7	4.8	4	4.9
THC0290_N_0503	829746	830044	1	Region	3prime				new transcription segment	hisS(CDS:THC0290_0693)	2429	A175	B63	C19	299	2	1	1	0	THC0290_0694;THC0290_N_0502	0	NA	NA	NA	-	7.9	7.9	7.7	7.6	8	7.7	8.3	9.5	7.4	8	7.7	7.5	8.1	7.9	7.6	7.3	4.2	6.8	3.9	4	7.8	7.8	8.1	8
THC0290_0694	829842	830741	-1	CDS	NA	xerD	THC0290_v2_0741	xerD	Tyrosine recombinase XerD	NA	2253	A1504	B516	C143	900	1	1	0	0	THC0290_N_0503	NA	NA	NA	NA	-	9.3	9.4	9.1	9.1	9.2	9.4	9.4	9	10	10.2	9.3	9.2	10.1	10	9.5	9.5	10.1	10.1	8.9	9.9	9.4	9.3	9.1	9.3
THC0290_N_0504	830742	830830	-1	Region	3prime				new transcription segment	fspA(CDS:THC0290_0695)	2806	A420	B161	C44	89	0	0	0	0	-	0	NA	NA	NA	-	4.6	3.9	4.3	4	4	3.9	3.9	4.2	3.9	3.9	4.1	4.4	3.9	3.9	3.9	3.9	3.9	3.9	3.9	3.9	3.9	4.1	4.5	4.9
THC0290_0695	830831	831442	-1	CDS	NA	fspA	THC0290_v2_0742	fspA	Flavobacterial-specific protein antigen FspA precursor	NA	3341	A618	B183	C44	612	0	0	0	0	-	NA	NA	NA	NA	-	14.9	15.2	15.7	15.8	15.3	15.3	13.6	14.9	13.2	13	15.4	15.6	11.2	10.4	11.4	11.8	10.3	11.1	11.9	10.4	15	15.2	15.1	15
THC0290_0696	831952	832365	1	CDS	NA	aroQ	THC0290_v2_0743	aroQ	3-dehydroquinate dehydratase	NA	905	A1592	B534	C143	414	0	0	0	0	-	NA	NA	NA	NA	-	9.4	9.4	9.8	9.8	9.6	10	9.5	10.3	9.7	10	10.2	10.1	10.8	11	9.9	9.9	10.9	11.3	11.5	11.2	9.2	9.6	9.3	9.1
THC0290_N_0505	832366	832716	1	Region	intra				new transcription segment	NA(CDS:THC0290_0697);aroQ(CDS:THC0290_0696)	4023	A28	B15	C7	351	0	0	0	0	-	0	NA	NA	NA	-	9.6	9.5	9.8	10	9.7	9.6	9.7	8	9.4	9.4	10	10.1	9.8	10.1	9.8	9.7	8.9	9.6	10	10.3	9.5	9.8	9.7	9.5
THC0290_0697	832717	835182	1	CDS	NA		THC0290_v2_0745		Putative outer membrane protein precursor	NA	2793	A322	B120	C33	2466	0	0	0	0	-	NA	NA	NA	NA	-	8	7.9	7.9	7.9	7.2	7.1	6.9	6.4	6.1	6.3	8.1	8	7.3	7.5	7.3	6.7	8	7.5	8.7	8.5	7.9	7.9	7.6	7.9
THC0290_0698	835488	836156	1	CDS	NA		THC0290_v2_0746		Protein of unknown function	NA	4042	A261	B92	C27	669	0	0	0	0	-	NA	NA	NA	NA	-	10.6	10.7	10.9	10.9	11	11	10.6	11	10.7	10.7	11	11.1	10.5	10.4	10.4	10.2	10.5	10.3	10.5	10.7	10.7	10.6	10.8	10.5
THC0290_N_0506	836157	836330	1	Region	intra				new transcription segment	NA(CDS:THC0290_0699);NA(CDS:THC0290_0698)	3141	A625	B183	C44	174	0	0	0	0	-	0	NA	NA	NA	-	11.7	11.9	11.7	11.8	11.8	11.4	11.1	11.2	10.9	10.9	11.9	12	10.1	10.6	10.6	11	10.1	9.9	10.4	9.1	11.5	11.6	11.5	11.2
THC0290_0699	836331	837218	1	CDS	NA		THC0290_v2_0747		Probable membrane-bound lytic murein transglycosylase precursor	NA	3142	A625	B183	C44	888	0	0	0	0	-	NA	NA	NA	NA	-	10.4	10.6	10.6	10.7	10.6	10.5	10.4	10.2	10.1	10.1	10.7	10.7	9.8	9.6	9.8	10	9.2	9.3	9.2	8.1	10.3	10.5	10.4	10.2
THC0290_N_0507	837219	837332	1	Region	3prime				new transcription segment	NA(CDS:THC0290_0699)	307	A1429	B496	C141	114	0	0	0	0	-	0	NA	NA	NA	-	7.9	8	8.3	8.1	8.3	9.5	8.4	9.5	9	9.5	8.4	8.5	9.3	8.9	8.4	8.9	7.7	9.4	8.8	8.6	7.7	8.4	7.7	7.6
THC0290_N_0508	837284	837554	-1	Region	3prime				new transcription segment	murA(CDS:THC0290_0700)	308	A1429	B496	C141	271	0	0	0	0	-	0	NA	NA	NA	-	9.8	9.8	10.2	10.2	10.3	11	10.5	10.8	10.5	11.2	10.5	10.4	11.3	10.5	10.5	10.7	9.9	10.7	10.8	9.6	9.8	10.1	10	10
THC0290_0700	837555	838862	-1	CDS	NA	murA	THC0290_v2_0748	murA	UDP-N-acetylglucosamine 1-carboxyvinyltransferase	NA	2512	A214	B80	C25	1308	0	0	0	0	-	NA	NA	NA	NA	-	12.2	12.1	12.1	12.2	12.4	12.3	12.5	11	12.6	12.3	12	12	11.4	11.5	11.9	12	11.1	11.2	11.3	11.2	12	12	12.2	12.2
THC0290_N_0509	838863	838941	-1	Region	intra				new transcription segment	murA(CDS:THC0290_0700);NA(CDS:THC0290_0701)	2514	A216	B80	C25	79	0	0	0	0	-	0	NA	NA	NA	-	12.9	12.7	12.5	12.5	12.5	12.6	12.5	10.5	12.6	12.8	12.5	12.4	12	12	12	12.3	11.7	11.7	11.9	12.1	12.5	12.4	12.7	12.8
THC0290_0701	838942	839658	-1	CDS	NA		THC0290_v2_0749		Protein of unknown function	NA	2513	A214	B80	C25	717	0	0	0	0	-	NA	NA	NA	NA	-	12.5	12.5	12.6	12.7	12.8	12.6	12.8	10.8	12.9	12.7	12.6	12.5	12.1	12.1	12.5	12.4	11.7	11.8	11.7	11.8	12.5	12.6	12.6	12.6
THC0290_0702	839661	839945	-1	CDS	NA		THC0290_v2_0750		Hypothetical protein	NA	1114	A1709	B546	C143	285	0	0	0	0	-	NA	NA	NA	NA	-	11.6	11.4	11.1	11.1	11	12	11.4	10.7	12.3	12.5	11.1	11.1	12.7	12.3	11.8	11.9	12.9	12.9	13.4	13.7	11.2	11.5	11.4	11.6
THC0290_N_0510	840044	840245	-1	Region	indep	Rfp36			new transcription segment	NA	413	A1244	B419	C125	202	0	0	0	0	-	0	NA	NA	NA	-	8.5	8.6	8.3	8	7.7	8	8.2	8.6	8.6	8.9	8.4	8.5	8.5	7.3	8	8	9.2	8.9	9.9	10	8.8	8.9	8.9	9.2
THC0290_0703	840392	840925	1	CDS	NA		THC0290_v2_0751		Protein of unknown function	NA	2831	A540	B180	C44	534	0	0	0	0	-	NA	NA	NA	NA	-	11	10.9	9.9	9.9	9.3	9.7	9.5	10.7	9.8	10.8	10.2	9.9	10	9.8	9.4	9.4	9.5	9.5	9.9	9.9	11.2	11.2	11	11.1
THC0290_N_0511	840926	840969	1	Region	intra				new transcription segment	recQ2(CDS:THC0290_0704);NA(CDS:THC0290_0703)	-1	NA	NA	NA	44	0	0	0	0	-	0	NA	NA	NA	-	NA	NA	NA	NA	NA	NA	NA	NA	NA	NA	NA	NA	NA	NA	NA	NA	NA	NA	NA	NA	NA	NA	NA	NA
THC0290_0704	840970	842862	1	CDS	NA	recQ2	THC0290_v2_0752	recQ2	ATP-dependent DNA helicase RecQ2	NA	3305	A601	B183	C44	1893	0	0	0	0	-	NA	NA	NA	NA	-	10.2	10.1	9.4	9.3	8.8	8.5	8.7	8.6	8.3	8	9.7	9.5	8	8.5	8.5	8.2	8.1	6.4	7.8	6.1	10	10.2	9.8	10.1
THC0290_N_0512	842863	842945	1	Region	intra				new transcription segment	fmt(CDS:THC0290_0705);recQ2(CDS:THC0290_0704)	3678	A435	B165	C44	83	0	0	0	0	-	0	NA	NA	NA	-	11.9	11.8	11.6	11.4	11.2	11.4	10.9	11	11.1	11.6	12	11.9	11.4	11.3	11	11.3	11.1	11.4	11.5	11.4	11.8	12.3	11.6	11.7
THC0290_0705	842946	843896	1	CDS	NA	fmt	THC0290_v2_0753	fmt	Methionyl-tRNA formyltransferase	NA	3184	A608	B183	C44	951	0	0	0	0	-	NA	NA	NA	NA	-	10.6	10.6	10.2	10.1	9.7	9.5	9.7	9	9.9	9.7	10.3	10.3	9.6	9.5	9.6	9.8	9.3	9.3	9.7	9.3	10.5	10.4	10.6	10.6
THC0290_N_0513	843897	844024	1	Region	intra				new transcription segment	hupB(CDS:THC0290_0706);fmt(CDS:THC0290_0705)	3042	A533	B180	C44	128	0	0	0	0	-	0	NA	NA	NA	-	10.5	10.6	9.9	9.8	9.6	9.3	9.4	10.3	9.8	9.3	10.1	10.1	9.2	9.8	9.5	9.6	9	8.6	9.6	10.4	10.4	10.4	10.6	10.6
THC0290_0706	844064	844339	1	CDS	NA	hupB	THC0290_v2_0754	hupB	Histone-like bacterial DNA-binding protein HU-beta	NA	2569	A259	B91	C27	276	0	0	0	0	-	NA	NA	NA	NA	-	14.7	14.8	15.2	15.2	15.1	15	14.2	14.6	13.5	13.6	15.1	15.3	13.6	13.9	13.3	13.7	13.6	14	13.5	13.2	14.6	14.7	14.6	14.4
THC0290_N_0514	844340	844378	1	Region	3prime				new transcription segment	hupB(CDS:THC0290_0706)	-1	NA	NA	NA	39	0	0	0	0	-	0	NA	NA	NA	-	NA	NA	NA	NA	NA	NA	NA	NA	NA	NA	NA	NA	NA	NA	NA	NA	NA	NA	NA	NA	NA	NA	NA	NA
THC0290_N_0515	844379	844440	1	Region	intra				new transcription segment	NA(CDS:THC0290_0707);hupB(CDS:THC0290_0706)	-1	NA	NA	NA	62	0	0	0	0	-	0	NA	NA	NA	-	NA	NA	NA	NA	NA	NA	NA	NA	NA	NA	NA	NA	NA	NA	NA	NA	NA	NA	NA	NA	NA	NA	NA	NA
THC0290_0707	844456	845016	1	CDS	NA		THC0290_v2_0755		Putative transcriptional regulator	NA	1763	A1762	B546	C143	561	1	1	0	0	THC0290_N_0516	NA	NA	NA	NA	-	10.9	11.1	12	11.8	12.3	12.2	12.1	12.7	13	12.9	11.8	12	13.4	13.9	12.8	12.7	14.4	14.3	14.3	14.7	10.8	11.3	11	10.5
THC0290_N_0516	844739	845012	-1	Region	3prime				new transcription segment	NA(CDS:THC0290_0708)	253	A1684	B545	C143	274	1	0	1	0	THC0290_0707	0	NA	NA	NA	-	7.2	6.9	6.2	6.6	6.6	6.9	6.8	9	7.4	8.3	6.5	6.5	8.7	7.8	7.3	6.4	7.5	9.6	9.7	8.2	7.5	7.4	7.1	7.8
THC0290_0708	845013	845807	-1	CDS	NA		THC0290_v2_0756		Branched-chain amino acid aminotransferase/4-amino-4-deoxychorismate lyase family protein	NA	2740	A501	B175	C44	795	1	1	0	0	THC0290_N_0517	NA	NA	NA	NA	-	11.6	11.5	11.4	11.4	11.1	11.1	10.5	11.9	11.2	10.6	11.5	11.6	10.7	10.7	10.4	10.3	10.2	10.1	10.3	10	11.6	11.8	11.6	11.6
THC0290_N_0517	845017	845453	1	Region	3prime				new transcription segment	NA(CDS:THC0290_0707)	1730	A1643	B540	C143	437	1	0	1	0	THC0290_0708	0	NA	NA	NA	-	6.1	6.1	6.2	6.9	7.8	7.8	8.5	9.9	8.9	8.7	6.7	6.5	10.3	10.6	9.1	8.9	10.1	10.1	8.3	8.1	5.8	6.6	5	5.2
THC0290_0709	845862	846254	-1	CDS	NA		THC0290_v2_0757		Protein of unknown function	NA	3916	A66	B33	C14	393	0	0	0	0	-	NA	NA	NA	NA	-	11.5	11.7	12	11.9	11.7	12.2	11	12.5	11.6	11.7	12	12.1	11.8	11.6	10.9	11	11	11.5	11.7	11.1	11.5	11.8	11.7	11.4
THC0290_tRNA_0014	846398	846474	1	tRNA	NA				transfer RNA-Met	NA	1656	A1769	B546	C143	77	0	0	0	0	-	NA	NA	NA	NA	-	10.1	10	9.9	10.1	10.1	12.9	11.3	13.8	12.7	14.2	10.4	10	15.2	12.7	12	11.8	13.6	15.3	15.8	14.7	10.1	10.7	9.5	10.1
THC0290_N_0518	846475	846501	1	Region	3prime				new transcription segment	NA(tRNA:THC0290_tRNA_0014)	-1	NA	NA	NA	27	1	1	0	0	THC0290_N_0519	0	NA	NA	NA	-	NA	NA	NA	NA	NA	NA	NA	NA	NA	NA	NA	NA	NA	NA	NA	NA	NA	NA	NA	NA	NA	NA	NA	NA
THC0290_N_0519	846486	846777	-1	Region	3prime				new transcription segment	ribH(CDS:THC0290_0710)	3433	A595	B183	C44	292	1	1	0	0	THC0290_N_0520	0	NA	NA	NA	-	12.1	12.1	12.5	12.2	11.5	11.6	10.8	10.8	10.1	10	12.5	12.4	9.6	9.2	9.6	9.6	8.9	10	10.2	7.9	12.4	12.1	12.2	11.9
THC0290_N_0520	846502	846820	1	Region	3prime-PT				new transcription segment	NA	2231	A968	B307	C84	319	1	1	0	0	THC0290_N_0519	0	NA	NA	NA	-	7.2	7	6.6	6.4	6.2	7	6.7	9.1	7.7	8.3	6.6	5.9	9.2	8.3	8.3	7.7	8.6	7.9	8.1	6.9	7.5	7.6	7.6	8.4
THC0290_0710	846778	847347	-1	CDS	NA	ribH	THC0290_v2_0759	ribH	Riboflavin synthase, beta subunit	NA	3482	A600	B183	C44	570	0	0	0	0	-	NA	NA	NA	NA	-	12.6	12.5	12.2	12.2	11.6	11.3	10.7	10.9	10.2	10.1	12.1	12.3	9.1	8.9	9.4	9.5	9.3	9.6	9.9	9.8	12.5	12.3	12.5	12.2
THC0290_N_0521	847348	847417	-1	Region	intra				new transcription segment	ribH(CDS:THC0290_0710);NA(CDS:THC0290_0711)	3063	A454	B168	C44	70	0	0	0	0	-	0	NA	NA	NA	-	11.3	11.1	10.9	10.5	9.6	9.7	9.1	10	9.1	9.9	11.1	11.2	8.4	8.1	7.7	8.9	3.9	8.3	9.3	4.9	11.2	11.5	11.2	11.3
THC0290_0711	847418	848209	-1	CDS	NA		THC0290_v2_0760		Protein of unknown function	NA	3483	A600	B183	C44	792	0	0	0	0	-	NA	NA	NA	NA	-	13.6	13.6	13.4	13.2	12.3	12.1	11.4	11.9	10.9	11.1	13.4	13.4	10.4	10.1	10.3	10.7	10.8	10.9	11.2	10.5	13.6	13.7	13.7	13.7
THC0290_0712	848495	849574	1	CDS	NA	recF	THC0290_v2_0761	recF	DNA replication and repair protein RecF	NA	3622	A582	B183	C44	1080	0	0	0	0	-	NA	NA	NA	NA	-	9	8.7	8.6	8.5	8	8.1	7.7	8.4	7.7	7.4	8.8	8.6	8.2	8	7.8	7.9	8.1	8	8.2	8.3	8.6	8.6	9.2	9.1
THC0290_0713	849601	850293	1	CDS	NA		THC0290_v2_0762		Thioredoxin family protein precursor	NA	4222	A1042	B344	C102	693	0	0	0	0	-	NA	NA	NA	NA	-	11.2	11.2	12	12.1	12.5	12.5	12	12.1	11.6	11.7	11.9	12	11.9	12	11.6	11.5	11.7	12.1	11.9	12.3	10.9	11.2	11.1	11
THC0290_0714	850295	850969	1	CDS	NA		THC0290_v2_0763		Protein of unknown function	NA	2558	A252	B91	C27	675	0	0	0	0	-	NA	NA	NA	NA	-	11.5	11.6	12.3	12.2	12.6	12.4	12.3	12	11.4	11.4	12.1	12.4	11.4	11.1	11.2	11.3	11	10.9	11.1	10.3	11.4	11.3	11.3	11.1
THC0290_0715	850979	852040	1	CDS	NA	remC	THC0290_v2_0764	remC	RemC, Candidate alpha-glycosyltransferase, Glycosyltransferase family 4	NA	3299	A617	B183	C44	1062	0	0	0	0	-	NA	NA	NA	NA	-	11.3	11.3	11.8	11.8	12	11.6	11.6	10.2	9.8	9.6	11.9	12	9.8	9.9	10.2	10.1	9.9	9.5	9.4	9.5	11.3	10.9	10.8	10.7
THC0290_0716	852044	853891	1	CDS	NA	asnB	THC0290_v2_0765	asnB	Asparagine synthetase [glutamine-hydrolyzing]	NA	3298	A617	B183	C44	1848	0	0	0	0	-	NA	NA	NA	NA	-	10.4	10.4	11	10.9	11.1	11.2	10.8	10.3	9.6	9.3	11	11.1	8.6	8	9.3	9.4	7.5	9	8.5	8	10.4	10.2	10	10
THC0290_N_0522	853892	854019	1	Region	intra				new transcription segment	murB(CDS:THC0290_0717);asnB(CDS:THC0290_0716)	4240	A269	B97	C28	128	0	0	0	0	-	0	NA	NA	NA	-	9.5	9.5	10	10	10.2	11.5	10	11.6	9.6	10.5	10.3	10	9.9	8.3	8.6	8.9	8.8	10.2	10.9	7.6	9.4	9.5	9.2	9.1
THC0290_N_0523	854021	854077	1	Region	5prime				new transcription segment	murB(CDS:THC0290_0717)	4237	A267	B95	C28	57	0	0	0	0	-	0	NA	NA	NA	-	10.5	10.4	10.3	10.2	10.1	10.6	9.9	11.7	9.8	10.3	10.5	10.5	10.3	9.6	9.2	9.5	9.5	10.7	11	9.4	10.4	10.5	10.3	10.2
THC0290_0717	854078	855091	1	CDS	NA	murB	THC0290_v2_0766	murB	UDP-N-acetylmuramate dehydrogenase	NA	3170	A558	B183	C44	1014	0	0	0	0	-	NA	NA	NA	NA	-	10.8	10.8	10.5	10.6	10.5	10.5	10	10.7	9.7	9.5	10.8	10.8	9.4	9.8	9.4	9.4	10.1	9.8	10.2	10.6	10.8	10.8	10.7	10.4
THC0290_0718	855109	855891	1	CDS	NA		THC0290_v2_0767		Probable ABC-type iron(III)-transport system, ATPase component	NA	3162	A557	B183	C44	783	1	1	0	0	THC0290_N_0524	NA	NA	NA	NA	-	9.8	9.5	9.5	9.4	9.1	9.3	8.6	8.1	7.1	7.4	9.8	9.7	7.4	7.6	6.8	6.9	5.1	8.3	7.7	8.1	10	9.8	8.9	8.9
THC0290_N_0524	855197	855910	-1	Region	3prime				new transcription segment	NA(CDS:THC0290_0719)	688	A1376	B472	C137	714	1	0	1	0	THC0290_0718	0	NA	NA	NA	-	7.4	7.2	6.6	7	7	7.1	6.9	8.8	7.4	7.2	6.8	6.6	6.6	7.4	7.5	7.1	7.6	7.9	8.4	7.1	7.4	7.4	7.4	7.6
THC0290_0719	855911	856366	-1	CDS	NA		THC0290_v2_0768		Probable rRNA methyltransferase	NA	2279	A988	B312	C84	456	0	0	0	0	-	NA	NA	NA	NA	-	8.9	8.7	8.1	8.2	8.1	7.8	7.7	9.1	8.5	8	8.2	8.1	8.2	9.5	8.4	8.1	9.5	7.9	8.8	10	8.7	9	9.2	9.1
THC0290_0720	856373	856993	-1	CDS	NA		THC0290_v2_0769		Pseudouridylate synthase	NA	2311	A804	B244	C67	621	0	0	0	0	-	NA	NA	NA	NA	-	8.4	8.5	7.7	7.5	7.4	7.3	7.2	8.4	7.9	7.7	7.9	7.8	7.5	7.9	7.3	7.5	7.3	6.8	7.4	8.5	8.4	8.7	8.8	8.9
THC0290_0721	857058	858404	1	CDS	NA	rmuC	THC0290_v2_0770	rmuC	DNA recombination protein RmuC	NA	3896	A1473	B507	C142	1347	0	0	0	0	-	NA	NA	NA	NA	-	9.5	9.7	9.7	9.6	9.7	9.7	9.5	9.4	9.6	10	9.7	9.7	10.3	10.7	10	9.7	11	10.8	10.8	11	9.6	9.7	9.7	9.7
THC0290_0722	858412	858780	1	CDS	NA		THC0290_v2_0771		Protein of unknown function precursor	NA	3865	A1441	B501	C142	369	0	0	0	0	-	NA	NA	NA	NA	-	10.8	10.8	10.8	10.9	10.9	10.9	10.7	10.4	10.9	10.9	10.9	10.9	10.8	10.8	10.4	10.6	11.8	10.4	10.8	13.1	10.8	10.8	10.9	10.8
THC0290_0723	858781	859326	1	CDS	NA		THC0290_v2_0772		Acyl-CoA hydrolase family protein	NA	2373	A185	B67	C21	546	0	0	0	0	-	NA	NA	NA	NA	-	9.1	9.1	8.9	9	9.3	8.9	8.8	9.8	8.7	8.3	9.1	9	8	8.2	8.4	8.6	8.9	6.6	9	8.2	8.9	9.2	9	8.9
THC0290_N_0525	859327	859592	1	Region	3prime				new transcription segment	NA(CDS:THC0290_0723)	3016	A565	B183	C44	266	1	0	1	0	THC0290_0724	0	NA	NA	NA	-	7.8	7.6	7.2	7.4	7.4	7.4	6.9	8.6	5.8	6.4	7.5	7	4	4.3	5.9	6.3	4.5	5.3	6.7	4.9	7.6	7.8	7.1	7.4
THC0290_0724	859337	860293	-1	CDS	NA	irk	THC0290_v2_0773	irk	Inward rectifier potassium channel Irk	NA	912	A1604	B535	C143	957	1	1	0	0	THC0290_N_0525	NA	NA	NA	NA	-	8.2	8.2	8.2	8.2	8.5	8.5	9	8.7	10	9.7	8.2	8.2	9.5	9.9	8.9	8.9	10	9.8	10.2	10.9	8	8.1	8.2	8.4
THC0290_0725	860354	863206	-1	CDS	NA	carB	THC0290_v2_0774	carB	Carbamoyl-phosphate synthase large subunit	NA	2292	A787	B239	C67	2853	0	0	0	0	-	NA	NA	NA	NA	-	10.8	11	10.1	10.2	9.8	9.8	11	9.2	11	11	10.2	9.9	10	9.9	10	10	9.4	9.7	9.8	9.5	11.2	10.4	11.8	11.7
THC0290_N_0526	863207	863394	-1	Region	intra				new transcription segment	carB(CDS:THC0290_0725);rpmH(CDS:THC0290_0726)	2293	A787	B239	C67	188	1	0	0	1	THC0290_flavo-1_0037	0	NA	NA	NA	-	10.5	10.7	9.8	9.7	9.4	9.8	10.4	10.1	10.9	11.2	9.9	9.4	10.3	10.4	10	9.9	9.8	9.9	10.5	10.4	10.9	10.7	11.5	11.7
THC0290_flavo-1_0037	863278	863352	1	misc_RNA	NA				Flavo-1 RNA	NA	680	A1204	B414	C124	75	1	1	0	0	THC0290_N_0526	NA	NA	NA	NA	-	3.9	4	3.9	3.9	3.9	4.3	3.9	4.5	3.9	3.9	3.9	4	6.8	3.9	3.9	3.9	5.8	6.6	6.2	3.9	4.2	3.9	5.2	3.9
THC0290_N_0527	863395	863439	-1	Region	3prime				new transcription segment	rpmH(CDS:THC0290_0726)	-1	NA	NA	NA	45	0	0	0	0	-	0	NA	NA	NA	-	NA	NA	NA	NA	NA	NA	NA	NA	NA	NA	NA	NA	NA	NA	NA	NA	NA	NA	NA	NA	NA	NA	NA	NA
THC0290_0726	863440	863601	-1	CDS	NA	rpmH	THC0290_v2_0775	rpmH	50S ribosomal protein L34	NA	2226	A1457	B505	C142	162	0	0	0	0	-	NA	NA	NA	NA	-	12.5	12.5	11.7	11.4	10.8	12.1	10.8	11.9	11.4	12.5	12.3	11.7	13.1	12.5	11.8	11.9	12.6	13.3	13.4	12.1	13.1	13.2	12.9	12.8
THC0290_N_0528	863602	863656	-1	Region	5prime				new transcription segment	rpmH(CDS:THC0290_0726)	2227	A1457	B505	C142	55	0	0	0	0	-	0	NA	NA	NA	-	11.2	11.1	10.5	10.2	9.6	11.1	9.5	11.1	10.6	12.4	10.9	10.5	12.9	11.6	11.2	11.2	11.6	12.7	13.3	11.1	11.8	11.8	11.3	11.5
THC0290_0727	863756	864271	1	CDS	NA		THC0290_v2_0776		Probable transmembrane protein of unknown function	NA	2207	A846	B256	C70	516	0	0	0	0	-	NA	NA	NA	NA	-	11.1	11.1	10.6	10.5	9.8	9.6	9.6	10.2	10.7	10.7	10.6	10.6	10.6	11	10.4	10.4	10.6	10.3	10.5	10.8	11	11.4	11.5	11.5
THC0290_N_0529	864272	864411	1	Region	3prime				new transcription segment	NA(CDS:THC0290_0727)	2205	A845	B256	C70	140	0	0	0	0	-	0	NA	NA	NA	-	8.2	7.9	7.5	7.3	6.7	6.6	6.6	8.8	8.2	7.7	7.4	7.7	7.7	8.7	7.7	8.1	8.3	9.5	8.5	7.1	7.9	8.3	8	8.2
THC0290_0728	864839	866467	-1	CDS	NA	groL	THC0290_v2_0778	groL	60 kDa chaperonin GroEL	NA	3807	A840	B254	C69	1629	0	0	0	0	-	NA	NA	NA	NA	-	14.4	14.4	13.8	13.8	12.9	12.5	14.1	13	12.5	12.4	13.8	13.8	13.5	13.8	14.6	15.1	14.4	13.7	12.6	12.7	14.4	14.2	14.5	14.5
THC0290_N_0530	866468	866905	-1	Region	intra				new transcription segment	groL(CDS:THC0290_0728);groS(CDS:THC0290_0729)	3808	A840	B254	C69	438	0	0	0	0	-	1	866740,866874,-	0.975	135	LTIGAFDNFEGYKITSTFGKQKSHALRSQIRRDSPSIATNICEG	14.4	14.5	14.1	14.1	13.2	12.8	13.9	13.5	12	12.4	13.7	13.9	13.5	13.9	14.7	15	14.3	13.5	13.4	13.1	14.6	14.3	14.7	14.6
THC0290_0729	866906	867181	-1	CDS	NA	groS	THC0290_v2_0780	groS	10 kDa chaperonin GroES	NA	3809	A840	B254	C69	276	0	0	0	0	-	NA	NA	NA	NA	-	13.9	13.8	13.3	13.2	12.3	12.5	13.2	13.2	11.6	12.4	13.2	13.1	13.4	13.4	14	14.1	13.4	13.2	13	12.1	13.9	13.9	13.8	13.9
THC0290_N_0531	867274	867320	-1	Region	3prime				new transcription segment	secG(CDS:THC0290_0730)	2390	A391	B149	C42	47	0	0	0	0	-	0	NA	NA	NA	-	8.9	8.7	8.3	8.2	8	8.2	8.3	7.7	8.8	9	8.5	8.2	9	9.1	8.3	8	3.9	8.8	4.2	8.2	8.9	8.9	9.4	9.6
THC0290_0730	867321	867695	-1	CDS	NA	secG	THC0290_v2_0781	secG	Preprotein translocase SecG subunit	NA	3707	A524	B180	C44	375	0	0	0	0	-	NA	NA	NA	NA	-	13.3	13.4	13.1	13	12.6	12.8	12	12.7	12.1	12.3	13	13.1	12.8	12.8	12.7	12.7	12.8	12.8	12.4	12.7	13.3	13.6	13.4	13.5
THC0290_0731	867699	868541	-1	CDS	NA		THC0290_v2_0782		Protein of unknown function	NA	503	A1173	B404	C122	843	0	0	0	0	-	NA	NA	NA	NA	-	10.4	10.3	10	9.8	9.9	11.1	10.4	11.4	9.9	10.7	10	9.9	10.2	9.8	10.2	10.1	9.9	10.3	11.3	9.7	10.5	10.3	10.4	10.5
THC0290_N_0532	868542	868640	-1	Region	intra				new transcription segment	NA(CDS:THC0290_0731);NA(CDS:THC0290_0732)	78	A1013	B322	C87	99	0	0	0	0	-	0	NA	NA	NA	-	11.5	11.3	11	10.8	10.6	11	11.3	11.2	10.7	10.9	11	11.1	11.2	11.1	11.4	11.2	11	10.9	11.3	10.6	11.7	11.3	11.6	11.8
THC0290_0732	868641	869144	-1	CDS	NA		THC0290_v2_0783		Probable lipoprotein precursor. Putative lipopolysaccharide assembly protein LptE	NA	100	A1199	B413	C124	504	0	0	0	0	-	NA	NA	NA	NA	-	11.1	11	10.6	10.6	10.6	10.7	10.9	11	10.4	10.8	10.8	10.7	11.3	11.4	11.5	11.2	11.4	11.3	11.1	10.4	11.1	10.9	11.1	11.4
THC0290_N_0533	869145	869218	-1	Region	intra				new transcription segment	NA(CDS:THC0290_0732);NA(CDS:THC0290_0733)	101	A1199	B413	C124	74	0	0	0	0	-	0	NA	NA	NA	-	10.2	10.1	9.6	9.5	10	10.4	10.4	10.7	10.4	10.9	9.8	9.6	11.1	10.8	11	10.7	10.4	10.5	10.5	9	10.5	10.2	10.5	10.3
THC0290_0733	869219	870475	-1	CDS	NA		THC0290_v2_0784		Probable sigma-54-dependent transcriptional regulator	NA	102	A1199	B413	C124	1257	0	0	0	0	-	NA	NA	NA	NA	-	11.4	11.2	10.7	10.7	10.9	10.8	11.5	11.2	11.5	11.5	10.8	10.6	11.7	11.7	11.9	11.7	11.5	11.4	11.4	11	11.5	11.2	11.4	11.6
THC0290_N_0534	870476	870543	-1	Region	5prime				new transcription segment	NA(CDS:THC0290_0733)	103	A1199	B413	C124	68	0	0	0	0	-	0	NA	NA	NA	-	11	10.6	9.8	9.8	10.1	10.3	10.8	10.9	10.9	11.2	9.9	10.1	11.5	11.5	11.5	11.4	11.2	11.4	11.4	10.9	10.9	10.5	10.7	10.9
THC0290_N_0535	870545	870960	-1	Region	intra				new transcription segment	NA(CDS:THC0290_0733);miaB(CDS:THC0290_0734)	99	A1199	B413	C124	416	0	0	0	0	-	0	NA	NA	NA	-	10.5	10.3	9.4	9.3	9.5	9.2	10.1	11	10	10.2	9.7	9.6	10.8	11.1	11	11	10.8	10.5	10.4	10	10.5	10.5	10.3	10.6
THC0290_0734	870961	872406	-1	CDS	NA	miaB	THC0290_v2_0785	miaB	Probable TRNA-i(6)A37 modification enzyme MiaB	NA	1212	A1747	B546	C143	1446	0	0	0	0	-	NA	NA	NA	NA	-	11.3	11.2	10.7	10.7	10.9	11.1	11.6	11.4	12	12.1	10.9	10.7	12.9	12.8	12.1	11.9	13.5	13.6	14.2	14.9	11.3	11.3	11.4	11.5
THC0290_N_0536	872624	872743	-1	Region	3prime				new transcription segment	remH(CDS:THC0290_0735)	16	A1802	B553	C144	120	0	0	0	0	-	0	NA	NA	NA	-	6.1	6.4	6.3	6.5	7.1	7.6	7.4	9.8	6.9	7	6.1	6.6	6	3.9	5.8	6.5	3.9	6.9	8.6	3.9	6	5.8	5.1	5.8
THC0290_0735	872744	873166	-1	CDS	NA	remH	THC0290_v2_0787	remH	Gliding motility protein RemH precursor	NA	2563	A256	B91	C27	423	0	0	0	0	-	NA	NA	NA	NA	-	12.5	12.7	13.5	13.7	14.1	14.3	13.6	13.7	12.9	13.4	13.3	13.5	11.3	10.7	11.7	12	11.2	11.5	11.8	10.8	12.3	12.4	11.8	11.7
THC0290_0736	873196	873774	-1	CDS	NA		THC0290_v2_0788		Protein of unknown function precursor	NA	2564	A256	B91	C27	579	0	0	0	0	-	NA	NA	NA	NA	-	12.1	12.2	13.1	13.2	13.7	13.7	13.2	13.4	12.7	12.9	12.8	13.1	10.8	10.6	11.4	11.8	10.8	10.9	11.2	10.5	11.9	12	11.2	11.4
THC0290_N_0537	873775	873817	-1	Region	intra				new transcription segment	NA(CDS:THC0290_0736);NA(CDS:THC0290_0737)	-1	NA	NA	NA	43	0	0	0	0	-	0	NA	NA	NA	-	NA	NA	NA	NA	NA	NA	NA	NA	NA	NA	NA	NA	NA	NA	NA	NA	NA	NA	NA	NA	NA	NA	NA	NA
THC0290_0737	873818	874630	-1	CDS	NA		THC0290_v2_0789		Protein of unknown function	NA	4193	A1063	B352	C104	813	0	0	0	0	-	NA	NA	NA	NA	-	10.7	10.7	11.7	11.8	12.2	12.5	12	12.2	12.5	12.9	11.5	11.6	10.6	10.8	11.1	11.3	10.3	10.5	11.2	11.2	10.4	10.2	9.8	10.1
THC0290_0738	875152	877668	1	CDS	NA	topA	THC0290_v2_0790	topA	DNA topoisomerase I	NA	2841	A544	B180	C44	2517	0	0	0	0	-	NA	NA	NA	NA	-	11.5	11.5	10.4	10.5	9.8	9.6	9.9	8.1	10.4	10.1	10.7	10.6	9.8	10.1	10.1	10.1	9.8	9.3	9.3	9.8	11.5	11.4	11.9	11.9
THC0290_0739	877672	878817	1	CDS	NA	fjo29	THC0290_v2_0791	fjo29	Protein of unknown function Fjo29	NA	2800	A859	B259	C70	1146	0	0	0	0	-	NA	NA	NA	NA	-	11.1	10.9	10.1	10.1	10	9.5	9.7	10	10	9.9	10.3	10.1	9.7	10	10.3	10.1	10.9	9.4	10.6	10.9	10.8	11	11.1	11.3
THC0290_0740	878961	880355	1	CDS	NA	gldK	THC0290_v2_0792	gldK	Gliding motility lipoprotein precursor GldK	NA	4040	A1129	B377	C110	1395	0	0	0	0	-	NA	NA	NA	NA	-	13.9	13.9	14	14	13.9	13.6	13.4	13.9	13.9	13.3	14	14.1	13.7	14.1	14	13.9	13.6	13.3	13.6	14	13.8	13.9	13.9	13.9
THC0290_N_0538	880356	880405	1	Region	intra				new transcription segment	gldL(CDS:THC0290_0741);gldK(CDS:THC0290_0740)	52	A872	B266	C73	50	0	0	0	0	-	0	NA	NA	NA	-	3.9	4	3.9	4	4	3.9	3.9	4.3	5.9	4	3.9	4.1	4	5.2	4.1	4	6.1	4.1	4.7	4	4.2	4	4	3.9
THC0290_0741	880406	881056	1	CDS	NA	gldL	THC0290_v2_0793	gldL	Gliding motility transmembrane protein GldL	NA	2553	A248	B88	C27	651	0	0	0	0	-	NA	NA	NA	NA	-	14.9	14.8	15.1	15.2	14.9	15	14.4	14.5	15.1	14.7	14.9	15.2	14.8	15.1	14.8	14.8	14.4	14.3	14.4	14.1	14.6	14.6	14.8	14.6
THC0290_N_0539	881057	881103	1	Region	intra				new transcription segment	gldM(CDS:THC0290_0742);gldL(CDS:THC0290_0741)	-1	NA	NA	NA	47	0	0	0	0	-	0	NA	NA	NA	-	NA	NA	NA	NA	NA	NA	NA	NA	NA	NA	NA	NA	NA	NA	NA	NA	NA	NA	NA	NA	NA	NA	NA	NA
THC0290_0742	881104	882633	1	CDS	NA	gldM	THC0290_v2_0794	gldM	Gliding motility transmembrane protein GldM	NA	2554	A249	B88	C27	1530	0	0	0	0	-	NA	NA	NA	NA	-	14.8	14.8	15.1	15.3	15.1	15	14.6	14.5	15.1	14.4	15.1	15.2	14.3	14.6	14.7	14.6	14.1	13.9	13.7	13.5	14.8	14.6	14.9	14.7
THC0290_N_0540	882634	882679	1	Region	intra				new transcription segment	gldN(CDS:THC0290_0743);gldM(CDS:THC0290_0742)	2676	A747	B216	C56	46	0	0	0	0	-	0	NA	NA	NA	-	10.3	10.3	11.2	11	10.7	9.4	10.2	11.6	10.9	9.6	11	11.8	9.9	11	11.2	11.2	10.4	9.5	9.5	7.2	10.3	10.3	10.5	10.2
THC0290_0743	882683	883687	1	CDS	NA	gldN	THC0290_v2_0795	gldN	Gliding motility protein precursor GldN	NA	1724	A1778	B546	C143	1005	0	0	0	0	-	NA	NA	NA	NA	-	14.5	14.6	14.9	14.9	15.1	15.1	14.7	15.6	15.3	15	15	15.1	15.5	15.6	15.4	15.5	15.2	15.2	15.5	15.4	14.3	14.6	14.3	14.3
THC0290_N_0541	883688	883753	1	Region	3prime				new transcription segment	gldN(CDS:THC0290_0743)	51	A870	B266	C73	66	0	0	0	0	-	0	NA	NA	NA	-	3.9	3.9	4	4.1	4.1	3.9	3.9	5.7	5.6	3.9	4	4	4.1	4.5	3.9	4	5.8	4.1	4.2	3.9	4.3	4.3	3.9	3.9
THC0290_0744	883754	884800	1	CDS	NA	fjo30	THC0290_v2_0796	fjo30	Glycine/D-amino acid oxidases (deaminating) family protein Fjo30	NA	2420	A121	B50	C18	1047	1	1	0	0	THC0290_N_0542	NA	NA	NA	NA	-	9.3	9.3	8.9	8.8	8.8	9	9	9.6	9.1	9	8.9	8.9	9	8.9	8.5	8.3	8.9	8.8	8.4	7.4	9.5	9.6	9	9.2
THC0290_N_0542	883959	884947	-1	Region	3prime				new transcription segment	NA(CDS:THC0290_0745)	438	A1246	B419	C125	989	1	0	1	0	THC0290_0744	0	NA	NA	NA	-	7.7	7.5	7	7.5	7.6	7.4	8.3	8	8.6	7.6	7.3	7.2	7.4	8.6	8.2	7.2	6.2	7.6	9.3	8.2	7.7	7.6	7.8	7.9
THC0290_flavo-1_0038	884826	884933	-1	misc_RNA	NA				Flavo-1 RNA	NA	210	A1813	B557	C145	108	0	0	0	0	-	NA	NA	NA	NA	-	8.3	8.1	7.7	8.2	8.9	8.7	9.4	10.9	10.4	10.2	8	7.6	8.8	8.9	8.8	8.7	4.1	8.6	9.6	7.9	8	8.1	8.4	8.5
THC0290_0745	884948	885376	-1	CDS	NA		THC0290_v2_0797		Protein of unknown function	NA	1493	A1768	B546	C143	429	0	0	0	0	-	NA	NA	NA	NA	-	10.1	10	9.9	10.2	10.9	11.6	11.2	12.9	12.6	13.1	9.9	9.8	12.4	12.2	11	11.1	12.8	13.1	13	12.6	9.6	10.1	10.3	10.1
THC0290_N_0543	885343	885446	1	Region	5prime				new transcription segment	NA(CDS:THC0290_0746)	2204	A844	B256	C70	104	0	0	0	0	-	0	NA	NA	NA	-	9.5	9.3	8.3	8	7.5	7.8	7.3	7	8.3	8.9	8.5	8.3	9.3	9	8.2	8.1	9.3	10.1	9.6	6.4	9.5	9.7	9.9	10.1
THC0290_0746	885447	887357	1	CDS	NA		THC0290_v2_0799		Probably involved in regulation of translation initiation	NA	2842	A544	B180	C44	1911	1	1	0	0	THC0290_N_0544	NA	NA	NA	NA	-	11.3	11	10	10	9.3	9.1	9.3	9.2	9.5	9.4	10.1	9.9	9.3	9.2	9.1	9.2	9.8	9.3	9.4	9.8	11.2	11	11.6	11.7
THC0290_N_0544	887134	887639	-1	Region	3prime				new transcription segment	NA(CDS:THC0290_0747)	2435	A132	B53	C18	506	2	1	1	0	THC0290_0746;THC0290_N_0545	0	NA	NA	NA	-	6.8	6.5	5.9	6.2	5.7	6.4	6	9.2	5.6	6.2	6.1	6	4	3.9	3.9	4.4	3.9	3.9	3.9	3.9	6.6	7.1	6.2	6.9
THC0290_N_0545	887358	887776	1	Region	3prime				new transcription segment	NA(CDS:THC0290_0746)	2996	A574	B183	C44	419	2	1	1	0	THC0290_0747;THC0290_N_0544	0	NA	NA	NA	-	7.3	7.6	6.3	6.2	5.7	6.2	6.3	6.6	3.9	6.1	6.7	6.1	4.2	4	5.4	5.5	3.9	3.9	4.4	5.8	7.9	7.8	7.8	8.2
THC0290_0747	887640	888794	-1	CDS	NA		THC0290_v2_0800		Protein of unknown function	NA	2995	A576	B183	C44	1155	1	1	0	0	THC0290_N_0545	NA	NA	NA	NA	-	10.1	10.1	9.4	9.5	8.8	8.8	8.5	9.4	7.3	7	9.5	9.4	6.1	6.7	5.6	6.6	6.3	6.2	7.5	4	9.9	10.4	10.4	10.6
THC0290_N_0546	888768	888915	-1	Region	5prime				new transcription segment	NA	1639	A1769	B546	C143	148	0	0	0	0	-	0	NA	NA	NA	-	7.9	7.7	8.2	8.2	8.1	9.1	8	9	9.3	10.3	8.3	8.5	11.5	10.1	9.1	8.7	9.9	11.7	12.4	10.6	7.7	7.9	7.6	7.5
THC0290_0748	889267	890505	1	CDS	NA		THC0290_v2_0801		Probable type II cytosine-specific modification methyltransferase	NA	1944	A1750	B546	C143	1239	1	1	0	0	THC0290_N_0547	NA	NA	NA	NA	-	10.9	10.9	10.5	10.6	10.6	10.6	10.7	10.7	11.6	11.7	10.6	10.7	12	12.7	11.7	11.7	12	11.9	11.5	11.9	10.8	11.1	11	10.9
THC0290_N_0547	890208	890480	-1	Region	3prime				new transcription segment	NA(CDS:THC0290_0749)	2382	A193	B70	C21	273	1	0	1	0	THC0290_0748	0	NA	NA	NA	-	7.9	7.9	7.6	7.9	8	8.1	8.3	9.2	7.4	7.5	7.5	7.6	6.6	3.9	6.1	5.9	7.7	4.3	5.3	4.3	8.1	7.8	7.3	7.9
THC0290_0749	890481	891245	-1	CDS	NA		THC0290_v2_0802		Probable type II restriction enzyme	NA	2730	A102	B45	C16	765	1	1	0	0	THC0290_N_0548	NA	NA	NA	NA	-	9.8	9.7	9.5	9.5	9.5	9.4	9.3	10.1	9.5	9.5	9.4	9.5	8.8	8.4	8.7	8.9	9.2	8.5	8.9	8.4	9.7	9.7	9.5	9.7
THC0290_N_0548	890506	891130	1	Region	3prime				new transcription segment	NA(CDS:THC0290_0748)	299	A1218	B416	C125	625	1	0	1	0	THC0290_0749	0	NA	NA	NA	-	7.3	6.8	6.5	6.6	7	7.1	7.7	8.9	7.8	7.5	6.9	6.3	8.3	9.3	8.3	7.6	7.8	7.1	7.8	3.9	7.5	7.3	7	7.2
THC0290_N_0549	891554	891603	-1	Region	3prime				new transcription segment	NA(CDS:THC0290_0750)	3985	A294	B109	C31	50	0	0	0	0	-	0	NA	NA	NA	-	6.1	5.7	5.1	4.2	4.5	4.3	4.6	5.8	4.5	4.2	4.2	4.2	4	6.4	4.4	3.9	4.9	6.3	8.1	4	6.3	6.6	5.9	6.4
THC0290_0750	891604	892050	-1	CDS	NA		THC0290_v2_0803		Probable DnaJ-class molecular chaperone	NA	2816	A801	B244	C67	447	0	0	0	0	-	NA	NA	NA	NA	-	12.1	12.1	10.4	10.3	9.9	10.4	10.6	11.8	11.6	12.2	10.6	10.4	11.8	11.7	11.7	11.8	11.3	11.6	11.7	9.8	12.2	12.6	12.1	12.4
THC0290_N_0550	892051	892112	-1	Region	5prime				new transcription segment	NA(CDS:THC0290_0750)	2817	A801	B244	C67	62	0	0	0	0	-	0	NA	NA	NA	-	12.7	12.7	11.5	11	10.6	10.9	10.7	12.4	11.9	12.4	11.6	11.5	12.5	11.9	12.1	12.4	11.4	11.7	11.9	10.3	12.8	13.7	12.6	13
THC0290_N_0551	892388	892599	1	Region	indep	Rfp37			new transcription segment	NA	901	A1598	B535	C143	212	0	0	0	0	-	0	NA	NA	NA	-	6.7	6.4	6.7	6.9	7.4	7.5	7.3	8.6	8.5	8.5	7.4	7.1	8.1	7.6	7.8	7.7	8	5.3	9	9.8	6	6.9	5.9	5.7
THC0290_tRNA_0015	892642	892717	-1	tRNA	NA				transfer RNA-Met	NA	1657	A1769	B546	C143	76	0	0	0	0	-	NA	NA	NA	NA	-	11.8	11.6	11.7	12.3	12.6	15.3	13.3	16	15.1	16	12.8	12	16.3	14.8	13.8	13.1	15.1	15.8	16.2	15.5	12.2	12.5	11.8	12
THC0290_tRNA_0016	892749	892824	-1	tRNA	NA				transfer RNA-Met	NA	1658	A1769	B546	C143	76	0	0	0	0	-	NA	NA	NA	NA	-	11.8	11.5	11.6	12.2	12.5	15.2	13.1	16	15.1	16	12.7	11.9	16.2	14.7	13.8	13.1	15	15.7	16.2	15.5	12	12.4	11.7	12
THC0290_N_0552	893017	893063	1	Region	5prime				new transcription segment	era(CDS:THC0290_0751)	3888	A1478	B507	C142	47	0	0	0	0	-	0	NA	NA	NA	-	7.9	7.9	7.5	7.2	7.2	7.2	7.8	8.2	9.1	9.7	7.5	7.6	10	10.2	9.8	9.7	10.6	10.8	10.6	10.1	8	7.8	8.1	8.2
THC0290_0751	893064	893945	1	CDS	NA	era	THC0290_v2_0805	era	GTP-binding protein Era	NA	815	A971	B307	C84	882	0	0	0	0	-	NA	NA	NA	NA	-	11.3	11.4	10.4	10.4	10.4	10.7	10.9	11.5	11.7	12	10.6	10.5	12.2	12.1	11.8	11.6	12.2	12.2	12	12.2	11.4	11.6	11.8	12.1
THC0290_N_0553	893946	894137	1	Region	intra				new transcription segment	engA(CDS:THC0290_0752);era(CDS:THC0290_0751)	2228	A967	B307	C84	192	0	0	0	0	-	0	NA	NA	NA	-	10.5	10.2	9	9.3	9.1	8.6	9.4	9.8	10.4	9.9	9.5	9.2	10.1	11.3	10.5	10.3	10.8	10.2	10.2	9.3	10.2	10.3	10.7	10.9
THC0290_flavo-1_0039	893987	894064	1	misc_RNA	NA				Flavo-1 RNA	NA	2266	A951	B302	C82	78	0	0	0	0	-	NA	NA	NA	NA	-	9.5	9.2	8.4	8.3	8.4	8.2	9.3	9.2	9.7	9.7	8.4	8.5	9.6	10.1	9.6	9.5	9.9	8.9	8.5	5.7	9.3	9.2	9.8	10.2
THC0290_0752	894154	895464	1	CDS	NA	engA	THC0290_v2_0806	engA	GTP-binding protein EngA	NA	816	A971	B307	C84	1311	0	0	0	0	-	NA	NA	NA	NA	-	12.4	12.2	11.6	11.9	12.2	12.2	12.6	12.3	12.7	13	11.7	11.6	13.1	13.3	12.8	12.7	13.1	13	13	13.1	12.1	12.3	12.7	12.7
THC0290_0753	895795	896361	1	CDS	NA		THC0290_v2_0807		Protein of unknown function	NA	951	A1459	B505	C142	567	0	0	0	0	-	NA	NA	NA	NA	-	11.1	11	10.5	10.7	10.8	10.6	10.5	11.3	11.5	11.8	10.7	10.8	11.8	11.6	11	10.9	11.9	12.4	12.3	11.5	11	11.1	11.6	11.5
THC0290_N_0554	896362	896546	1	Region	intra				new transcription segment	NA(CDS:THC0290_0754);NA(CDS:THC0290_0753)	21	A1373	B472	C137	185	0	0	0	0	-	0	NA	NA	NA	-	10.5	10.1	9.7	9.9	10	9.4	10	10.9	11	10.4	10.1	9.9	9.8	11	10.7	10.4	9.3	9.3	10.1	9.9	10.1	10.3	10.5	10.7
THC0290_0754	896547	899900	1	CDS	NA		THC0290_v2_0808		Protein of unknown function precursor, putative adhesin	NA	1797	A1794	B549	C143	3354	0	0	0	0	-	NA	NA	NA	NA	-	11.1	10.9	11.7	12	12.2	11.9	12.2	11.6	12.7	12.4	11.8	11.8	12.5	12.4	12.8	12.7	12.4	12.2	12	12.3	10.9	10.9	11.2	11.2
THC0290_N_0555	899901	900114	1	Region	3prime				new transcription segment	NA(CDS:THC0290_0754)	1798	A1794	B549	C143	214	1	0	1	0	THC0290_0755	0	NA	NA	NA	-	9.9	10	11.7	11.3	11.9	12.3	11.9	12	12.4	12.7	11.3	11.5	13	12.5	12.7	12.9	12.3	12.9	12.6	11.1	10	10.4	10.4	10.6
THC0290_0755	900063	900389	-1	CDS	NA		THC0290_v2_0809		Protein of unknown function	NA	524	A1305	B444	C130	327	1	1	0	0	THC0290_N_0555	NA	NA	NA	NA	-	6.5	6.4	6.2	6.1	6.2	6.3	6.1	7.6	6.2	5.8	6	6.5	6.8	6.8	4.6	5.2	6.4	6.1	8.2	6.2	6.1	6.7	6.3	6.3
THC0290_N_0556	900417	900873	1	Region	5prime				new transcription segment	hutU(CDS:THC0290_0756)	914	A1604	B535	C143	457	0	0	0	0	-	0	NA	NA	NA	-	10.8	10.9	11.3	10.9	11.2	12	11.5	10.9	12.2	12.9	11.2	11.2	12.3	12.2	11.7	11.6	13.1	13.3	13	13	11	10.9	10.5	10.5
THC0290_0756	900874	902856	1	CDS	NA	hutU	THC0290_v2_0811	hutU	Urocanate hydratase	NA	4183	A236	B84	C26	1983	0	0	0	0	-	NA	NA	NA	NA	-	11.7	11.6	11.8	11.8	12	12.1	12.5	9.4	12.3	12.2	11.9	11.7	11.4	11.1	11.7	11.4	11.4	11.3	11.2	11.1	11.8	10.8	11.3	11.3
THC0290_N_0557	902857	903025	1	Region	intra				new transcription segment	NA(CDS:THC0290_0757);hutU(CDS:THC0290_0756)	2526	A223	B83	C25	169	1	0	0	1	THC0290_flavo-1_0040	0	NA	NA	NA	-	8.5	8.6	8.6	8.6	8.9	9.6	9.7	7.5	7.8	8.9	9	8.8	9.1	8.4	9.1	8.4	9.2	9	8	4	8.9	8.1	8.5	8.5
THC0290_flavo-1_0040	902871	903014	-1	misc_RNA	NA				Flavo-1 RNA	NA	1321	A1747	B546	C143	144	1	1	0	0	THC0290_N_0557	NA	NA	NA	NA	-	6.7	7.2	6.9	7.1	6.9	6.6	7.1	7.3	7.8	7.3	6.5	7	8.8	10.5	8.8	7.3	10.4	9	9.6	11.3	6.5	6.4	6.9	7
THC0290_0757	903026	904129	1	CDS	NA		THC0290_v2_0812		Protein of unknown function	NA	2532	A232	B83	C25	1104	0	0	0	0	-	NA	NA	NA	NA	-	11.9	12	12.3	12	12.3	12.7	12.3	10.8	9.7	10.9	12.2	12.2	10.5	10.1	10.9	10.7	10.7	10.8	10.2	10.4	12.2	11.5	11.5	11.7
THC0290_0758	904166	904696	1	CDS	NA		THC0290_v2_0813		Probable lipoprotein precursor	NA	3746	A417	B158	C44	531	0	0	0	0	-	NA	NA	NA	NA	-	11.4	11.4	11.7	11.5	11.8	12	11.9	11.1	10.1	10.4	11.6	11.6	10.2	9.7	10.7	10.8	10.2	10.3	10.2	10.2	11.4	11	11	11
THC0290_0759	904813	906567	1	CDS	NA	phhA	THC0290_v2_0814	phhA	Phenylalanine 4-monooxygenase	NA	4179	A1805	B554	C144	1755	1	1	0	0	THC0290_N_0558	NA	NA	NA	NA	-	11.4	11.4	12	11.8	12.1	12.1	12.2	11.7	12.3	12	12	12.1	11.7	11.6	11.7	11.8	11.4	11.6	11.7	11.6	11.5	11.3	11.4	11.3
THC0290_N_0558	906298	906570	-1	Region	3prime				new transcription segment	NA(CDS:THC0290_0760)	2381	A192	B70	C21	273	1	0	1	0	THC0290_0759	0	NA	NA	NA	-	6.7	6.7	6	6.1	5.4	7.6	6.4	8.9	6.9	8	6.5	6	8.2	4.1	3.9	5.4	3.9	4	4.4	3.9	6.7	6.7	6.3	6.6
THC0290_N_0559	906568	906717	1	Region	3prime				new transcription segment	phhA(CDS:THC0290_0759)	266	A1662	B542	C143	150	1	0	1	0	THC0290_0760	0	NA	NA	NA	-	10.1	10.1	10.8	10.9	11.3	12	11.7	13.8	11.9	11.8	10.8	10.7	11.6	11.4	11.3	11.4	11	11.2	11.3	10.4	10.1	10.3	10.2	10.4
THC0290_0760	906571	907191	-1	CDS	NA		THC0290_v2_0815		Protein of unknown function	NA	3927	A77	B35	C14	621	1	1	0	0	THC0290_N_0559	NA	NA	NA	NA	-	9.1	9.1	9.2	9.2	8.9	8.8	8.3	9	8.5	8.9	9.1	9.3	9.2	9.2	8.3	8.1	9.2	9.6	9.4	9	9.2	9.3	9.5	9.1
THC0290_0761	907194	908144	-1	CDS	NA		THC0290_v2_0816		Protein of unknown function	NA	2688	A89	B42	C16	951	1	1	0	0	THC0290_N_0560	NA	NA	NA	NA	-	8.5	8.6	8.4	8.4	8.3	8.6	8.3	9.2	8.8	8.6	8.3	8.4	9.2	8.7	7.7	7.8	7.3	8.5	7.3	4.3	8.6	8.6	8.6	8.8
THC0290_N_0560	907245	908039	1	Region	indep	Rfp38			new transcription segment	NA	2084	A1238	B419	C125	795	1	0	1	0	THC0290_0761	0	NA	NA	NA	-	5.6	5.8	5.1	5.5	5.2	5.3	5	7.1	4.3	5.9	5.8	5.5	5.9	5.3	5.5	5.7	6.5	4.8	6.7	7.2	5.6	6.1	5.6	6.2
THC0290_N_0561	908145	908243	-1	Region	3prime				new transcription segment	NA(CDS:THC0290_0762)	2745	A281	B102	C28	99	0	0	0	0	-	0	NA	NA	NA	-	6.6	6.4	6	5.9	6.5	7.1	6.7	8.9	8.7	8.5	5.9	5.5	6.3	4.2	4.3	4.7	4.4	5.8	6.7	3.9	6.4	6.4	6.2	6.3
THC0290_0762	908244	908816	-1	CDS	NA		THC0290_v2_0817		Protein of unknown function	NA	3434	A595	B183	C44	573	0	0	0	0	-	NA	NA	NA	NA	-	13.4	13.5	13.8	13.6	13.3	13.9	13.1	13	12.6	13.1	13.7	13.8	11.9	11.5	11.8	11.8	11.7	12.1	12	11.7	13.6	13.6	13.2	13.2
THC0290_N_0562	908817	909008	-1	Region	5prime				new transcription segment	NA(CDS:THC0290_0762)	3879	A893	B277	C76	192	0	0	0	0	-	0	NA	NA	NA	-	13	13.1	13.1	13	12.8	13.6	12.6	13.2	12.7	13.4	13	12.9	13	13.8	12.6	12.3	13.3	13.9	14.2	13.6	13.1	13	12.6	12.7
THC0290_0763	909139	910893	1	CDS	NA		THC0290_v2_0818		Probable ABC-type multidrug transport system, ATPase and permease components	NA	948	A1357	B469	C136	1755	0	0	0	0	-	NA	NA	NA	NA	-	9	9.1	9.3	9.3	9.8	9.2	9.7	10.3	10.3	9.9	9.2	9.2	9.7	9.7	9.9	9.9	9.6	9.5	9.8	9.6	9	9.2	9.4	9.2
THC0290_N_0563	910894	911072	1	Region	3prime				new transcription segment	NA(CDS:THC0290_0763)	1051	A1685	B545	C143	179	0	0	0	0	-	0	NA	NA	NA	-	8.5	8.4	8.3	8.5	9	9.4	9.3	10.7	10.2	10.2	8.3	8.2	9.7	9.3	8.8	9	8.8	8.7	10.1	10.1	8.3	8.3	8.4	8.6
THC0290_0764	911109	912848	-1	CDS	NA		THC0290_v2_0819		Protein of unknown function	NA	3143	A626	B183	C44	1740	0	0	0	0	-	NA	NA	NA	NA	-	11.1	11.3	11.1	11.1	11.2	11.3	10.8	11.9	9.1	10.3	10.9	11.2	9.8	10.1	10.3	10.6	10.1	9.8	10.4	10.3	11.1	11.5	11.1	11
THC0290_0765	912839	913066	-1	CDS	NA		NA		Protein of unknown function	NA	3144	A626	B183	C44	228	0	0	0	0	-	NA	NA	NA	NA	-	11.6	11.7	11.4	11.5	11.5	11.1	10.9	12	9.3	9.8	11.2	11.4	9.3	9.7	10.1	10.4	9.6	9.8	10.5	9.2	11.6	11.7	11.3	11.3
THC0290_0766	913053	914027	-1	CDS	NA		THC0290_v2_0820		Protein of unknown function	NA	3349	A601	B183	C44	975	0	0	0	0	-	NA	NA	NA	NA	-	11.7	11.9	11.8	11.8	11.7	11.6	11.1	11.2	8	9	11.7	11.6	9.8	9.6	10	10.2	10	10.1	10.1	9.9	11.9	11.7	11.6	11.5
THC0290_N_0564	913998	914265	1	Region	indep	Rfp39			new transcription segment	NA	1627	A1768	B546	C143	268	1	1	0	0	THC0290_N_0565	0	NA	NA	NA	-	4.9	5.1	4.9	5.4	5.9	6.9	6.6	8.9	9.4	8.9	5.4	5.1	10.1	9.7	8.8	8	8.3	10.5	11.4	10.6	4.3	5.1	4.4	4.4
THC0290_N_0565	914028	914351	-1	Region	intra				new transcription segment	NA(CDS:THC0290_0766);NA(CDS:THC0290_0767)	3291	A617	B183	C44	324	1	1	0	0	THC0290_N_0564	0	NA	NA	NA	-	12.2	12	12.2	12.4	12.5	12.3	12	11.2	10.8	9.9	11.9	11.8	9.8	9.5	10.6	10.6	10.2	10.4	10.9	10.8	12.2	11.7	11.9	11.8
THC0290_0767	914352	915149	-1	CDS	NA		THC0290_v2_0821		Protein of unknown function precursor	NA	3292	A617	B183	C44	798	0	0	0	0	-	NA	NA	NA	NA	-	12.3	12.4	12.7	12.8	13	12.8	12.7	11.8	11.2	10.8	12.3	12.3	10.5	10.4	11.4	11.3	10.9	10.8	10.3	10.2	12.5	12.1	12.4	12.3
THC0290_0768	915149	915586	-1	CDS	NA		THC0290_v2_0822		Protein of unknown function	NA	3293	A617	B183	C44	438	0	0	0	0	-	NA	NA	NA	NA	-	12.5	12.6	12.7	12.9	13	13.1	12.8	12.1	11.6	11.2	12.4	12.5	11.2	10.9	11.6	11.7	11.2	11.2	11	10.3	12.5	12.4	12.4	12.3
THC0290_N_0566	915587	915664	-1	Region	intra				new transcription segment	NA(CDS:THC0290_0768);NA(CDS:THC0290_0769)	2885	A613	B183	C44	78	0	0	0	0	-	0	NA	NA	NA	-	10.6	10.5	10.5	10.9	11.1	11	11.1	10.8	10.2	10.1	10.5	10.6	9.9	9.5	10.2	10.3	10.1	9.8	8.7	9.4	10.5	10.4	10.5	10.3
THC0290_0769	915665	916252	-1	CDS	NA		THC0290_v2_0823		LemA family protein	NA	2570	A259	B91	C27	588	0	0	0	0	-	NA	NA	NA	NA	-	12.6	12.9	13.1	13.2	13.5	13.5	13	12.8	12.5	12.1	12.6	12.8	12	11.7	12.4	12.4	12	12	11.7	11.8	12.8	12.8	12.8	12.7
THC0290_N_0567	916253	916300	-1	Region	intra				new transcription segment	NA(CDS:THC0290_0769);NA(CDS:THC0290_0770)	39	A1148	B390	C117	48	0	0	0	0	-	0	NA	NA	NA	-	3.9	3.9	3.9	3.9	4.7	3.9	3.9	4	5.1	4.2	3.9	4	5.5	3.9	3.9	3.9	3.9	7.6	3.9	3.9	3.9	3.9	3.9	3.9
THC0290_0770	916301	916633	-1	CDS	NA		THC0290_v2_0824		Probable transcriptional regulator, MerR family	NA	2115	A1409	B486	C140	333	0	0	0	0	-	NA	NA	NA	NA	-	10.2	10.3	10.3	10.4	10.5	10.1	10.4	9.5	10.7	10.4	10.1	10.1	10.7	11.1	10.7	10.7	10.8	10.5	10.1	10.6	10.2	10.1	10.2	9.8
THC0290_0771	916633	917610	-1	CDS	NA		THC0290_v2_0825		Transmembrane peptidase, M23B family	NA	1550	A1765	B546	C143	978	0	0	0	0	-	NA	NA	NA	NA	-	9.6	9.6	9.8	10	10.1	10.5	10.1	10.3	10.9	11.2	9.6	9.8	11.1	11.4	10.8	10.8	11.5	11.1	11.6	11.6	9.6	9.8	9.6	9.5
THC0290_N_0568	917638	917940	1	Region	5prime				new transcription segment	alaS(CDS:THC0290_0772)	1115	A1707	B546	C143	303	1	0	0	1	THC0290_flavo-1_0041	0	NA	NA	NA	-	10.9	10.8	11	10.9	11.3	12.3	11.9	12	12.4	12.5	10.9	11.1	12.5	11.7	11.8	11.6	12.1	12.7	13	12.3	11.1	11	10.7	10.8
THC0290_flavo-1_0041	917717	917860	-1	misc_RNA	NA				Flavo-1 RNA	NA	457	A1320	B455	C133	144	1	1	0	0	THC0290_N_0568	NA	NA	NA	NA	-	3.9	3.9	4	4.1	4.3	4	3.9	5.7	4	4	3.9	4	3.9	3.9	4.1	3.9	4.1	4	6.5	3.9	3.9	3.9	3.9	4
THC0290_0772	917941	920604	1	CDS	NA	alaS	THC0290_v2_0826	alaS	Alanine--tRNA ligase	NA	4163	A1117	B373	C109	2664	0	0	0	0	-	NA	NA	NA	NA	-	11.9	12	11.9	12	12.4	12.3	12.7	12.3	12.6	12.4	11.8	11.9	11.7	11.5	12.1	12.3	11.6	11.5	11.7	11.4	11.8	11.9	11.9	11.9
THC0290_N_0569	920605	920943	1	Region	3prime				new transcription segment	alaS(CDS:THC0290_0772)	761	A1512	B519	C143	339	0	0	0	0	-	0	NA	NA	NA	-	10.2	10.1	10.1	10.1	10.8	11	11.4	13.6	12.1	12	10.2	10	11	10.9	11.3	11.4	10.5	10.8	11.4	10.4	9.9	10.3	9.8	10
THC0290_0773	921206	921964	1	gene	NA		THC0290_v2_0827		Truncated transposase (fragment)	NA	2449	A138	B54	C18	759	0	0	0	0	-	NA	NA	NA	NA	-	5.2	5.1	4.5	4.3	4	4.4	3.9	5.8	3.9	4	4.8	4.6	3.9	3.9	3.9	4.1	3.9	4	3.9	3.9	5	5.4	5	5
THC0290_N_0570	921984	922167	-1	Region	repeated_region				new transcription segment	NA	699	A1843	B564	C146	184	0	0	0	0	-	0	NA	NA	NA	-	3.9	3.9	4.3	3.9	3.9	6.8	5.2	6.3	6.9	8.7	4.1	4	6	3.9	3.9	3.9	3.9	3.9	3.9	3.9	4.3	3.9	4	3.9
THC0290_N_0571	922168	922229	-1	Region	3prime				new transcription segment	NA(CDS:THC0290_0774)	-1	NA	NA	NA	62	0	0	0	0	-	0	NA	NA	NA	-	NA	NA	NA	NA	NA	NA	NA	NA	NA	NA	NA	NA	NA	NA	NA	NA	NA	NA	NA	NA	NA	NA	NA	NA
THC0290_0774	922230	925658	-1	CDS	NA		THC0290_v2_0828		Methylmalonyl-CoA mutase	NA	4368	A1772	B546	C143	3429	0	0	0	0	-	NA	NA	NA	NA	-	8.7	8.8	9.5	9.8	10.3	10.4	10.7	9.4	11.2	10.9	9.2	9.3	10.2	10.1	10.5	10.4	10.4	10.4	10.3	10.7	8.8	8.4	8.7	8.6
THC0290_0775	926006	926245	1	CDS	NA		THC0290_v2_0829		Hypothetical protein	NA	1449	A1768	B546	C143	240	0	0	0	0	-	NA	NA	NA	NA	-	8.9	9.1	9.1	9.3	10.1	10.7	10	11.3	11	11.3	9.1	9.2	11.8	12.4	10.4	10.5	13	13.4	12.4	11.9	8.9	9.2	8.5	8.3
THC0290_0776	926245	926562	1	CDS	NA		THC0290_v2_0830		Putative plasmid stabilization system protein	NA	1386	A1765	B546	C143	318	0	0	0	0	-	NA	NA	NA	NA	-	8.7	9.1	9.1	9.4	10.2	10.1	10.1	11.6	10.9	10.5	9.1	9.3	10.9	11	10.3	10.3	10.9	11	10.8	10.5	8.8	9.3	8.5	8.3
THC0290_N_0572	926563	926969	1	Region	intra				new transcription segment	NA(CDS:THC0290_0777);NA(CDS:THC0290_0776)	2063	A1648	B540	C143	407	0	0	0	0	-	0	NA	NA	NA	-	9.2	9.2	9.1	9.1	9.5	9.5	9.6	10.6	9.9	9.6	9.2	9.4	10.3	10.6	10	10	9.9	10.2	11	10.3	9.3	9.3	9.1	9.1
THC0290_0777	926970	927692	1	CDS	NA		THC0290_v2_0831		Protein of unknown function precursor	NA	415	A1244	B419	C125	723	0	0	0	0	-	NA	NA	NA	NA	-	9.8	10.1	10.1	10.2	9.9	10	9.7	10.8	9.9	10.1	10.1	10.3	10.8	10.5	10.5	10.5	10.5	10.6	11.3	11.1	9.8	10.1	10.6	10.4
THC0290_N_0573	927787	927860	1	Region	indep	Rfp40			new transcription segment	NA	1063	A1768	B546	C143	74	0	0	0	0	-	0	NA	NA	NA	-	6.6	6.8	6.1	6.9	7	6.7	6.8	9.1	8.6	9.5	6.1	6.4	12	10.7	9.3	8.3	11.4	12.9	13.6	12.5	6.9	6.1	7.1	6.6
THC0290_0778	927858	928289	-1	CDS	NA		THC0290_v2_0832		Protein of unknown function	NA	2652	A47	B27	C13	432	0	0	0	0	-	NA	NA	NA	NA	-	9.5	9.6	9.2	9.1	8.8	8.8	8.1	9.2	9.1	9.1	9.2	9.2	9.1	9	8.6	8.8	9.1	8.9	10	9.9	9.6	9.8	10	9.9
THC0290_N_0574	928311	928514	-1	Region	5prime				new transcription segment	NA(CDS:THC0290_0778)	3854	A753	B222	C61	204	0	0	0	0	-	0	NA	NA	NA	-	8.8	8.7	8.3	8.4	8.2	8.3	8.1	8.3	9.3	9.1	8.4	8.3	8.6	8.9	8.3	8.9	7.6	9.5	9.6	6.9	9.1	8.6	8.7	9
THC0290_0779	928488	929126	1	CDS	NA		THC0290_v2_0833		Probable pyrophosphohydrolase	NA	1780	A1765	B546	C143	639	0	0	0	0	-	NA	NA	NA	NA	-	7.8	7.9	8.2	8.5	9.2	8.8	9.3	9	9.3	9.3	8.4	8.6	9.7	10.1	9.8	9.6	10.5	9.8	9.8	10.1	7.7	7.8	8	7.7
THC0290_0780	929172	929987	1	CDS	NA		THC0290_v2_0834		Probable acyltransferase	NA	1977	A1706	B546	C143	816	1	1	0	0	THC0290_N_0575	NA	NA	NA	NA	-	10.7	10.7	10.4	10.4	10.6	10.9	11	10.8	10.5	11	10.7	10.5	11.2	11.3	11.1	11	11.5	11.3	11.3	11.2	10.8	10.9	10.7	10.8
THC0290_N_0575	929531	929992	-1	Region	3prime				new transcription segment	NA(CDS:THC0290_0781)	339	A1226	B417	C125	462	1	0	1	0	THC0290_0780	0	NA	NA	NA	-	6.6	7	6.5	6.7	6.5	7.3	6.8	8.4	7.2	7.8	6.3	5.7	8.1	3.9	6.2	7.2	4.7	6.3	7.5	4.8	6.9	7	6.5	6.6
THC0290_0781	929993	930601	-1	CDS	NA		THC0290_v2_0835		Probable transmembrane protein of unknown function, putative anti ECF-type sigma factor	NA	691	A1232	B419	C125	609	0	0	0	0	-	NA	NA	NA	NA	-	8.7	8.9	8.4	8.6	8.4	8.8	8.4	10	9	9.2	8.1	8	9.4	9.3	9.1	9.1	9.3	9.1	9.8	10.3	8.7	9	8.6	8.5
THC0290_0782	930615	931109	-1	CDS	NA		THC0290_v2_0836		RNA polymerase ECF-type sigma factor	NA	1986	A1696	B546	C143	495	0	0	0	0	-	NA	NA	NA	NA	-	9.4	9.7	9.1	9.2	8.8	9.1	8.5	9.4	9.9	9.6	8.3	8.5	10	10.6	10	9.8	11.1	10.9	12.5	12.9	9.5	9.6	9.4	9.3
THC0290_flavo-1_0042	931193	931261	-1	misc_RNA	NA				Flavo-1 RNA	NA	2022	A1251	B419	C125	69	0	0	0	0	-	NA	NA	NA	NA	-	4.2	5.7	4.5	4	4.8	4.4	4.5	3.9	6.6	4.7	4.1	4	3.9	8.6	6.4	5.3	8.8	7.4	4.1	10.1	3.9	5.2	4.4	4.2
THC0290_0783	931324	932628	1	CDS	NA	ndh	THC0290_v2_0837	ndh	NADH dehydrogenase	NA	3902	A104	B45	C16	1305	0	0	0	0	-	NA	NA	NA	NA	-	9.5	9.5	9.8	9.5	9.6	9.8	10	7.8	10.1	9.7	9.5	9.4	9.8	9.3	9.8	9.3	9.6	8.8	8.2	9.2	9.8	9.1	9.9	10.1
THC0290_0784	932625	933680	-1	CDS	NA		THC0290_v2_0838		Probable transmembrane protein of unknown function	NA	1699	A1768	B546	C143	1056	0	0	0	0	-	NA	NA	NA	NA	-	7.9	7.8	7.8	8	8	8	8	8.9	8.7	8.7	8	7.9	8.8	8.7	8.1	7.9	8.9	9.4	9.3	9.3	7.8	7.8	7.7	7.6
THC0290_0785	933779	935242	1	CDS	NA	pepD	THC0290_v2_0839	pepD	Xaa-His dipeptidase	NA	659	A1358	B469	C136	1464	0	0	0	0	-	NA	NA	NA	NA	-	13.2	13.1	13.1	13.1	13.3	13.2	13.6	13.6	14.1	13.7	13.1	13.1	13.2	13.2	13.6	13.5	13.3	13.2	13.6	13.8	13	13	13.2	13.2
THC0290_N_0576	935243	935309	1	Region	3prime				new transcription segment	pepD(CDS:THC0290_0785)	705	A1855	B570	C149	67	0	0	0	0	-	0	NA	NA	NA	-	12.3	12.4	13	12.9	12.6	13.2	12.7	14.4	13.6	14	12.4	12.1	13.4	12.6	13	13.5	12	13	14.4	11.8	12.2	12.3	12.3	12.3
THC0290_N_0577	935730	935797	-1	Region	3prime				new transcription segment	NA(CDS:THC0290_0786)	256	A1650	B542	C143	68	0	0	0	0	-	0	NA	NA	NA	-	7.5	7	7.4	7.6	7.6	8.1	7.9	9.2	9.1	9.1	7.8	7.7	9	9.2	8.4	8.5	8.7	7.8	6.8	8	6.9	7.2	7	6.9
THC0290_0786	935798	936937	-1	CDS	NA		THC0290_v2_0840		Acyl-CoA dehydrogenase family protein	NA	3734	A418	B159	C44	1140	0	0	0	0	-	NA	NA	NA	NA	-	12.8	12.8	13	13.1	13.1	12.7	12.4	12.5	12.6	12.2	13.2	13.2	12.2	12.5	12.7	12.6	12	11.9	12	12	12.8	12.7	12.9	12.7
THC0290_0787	937033	938100	1	CDS	NA		THC0290_v2_0841		Protein of unknown function	NA	903	A1601	B535	C143	1068	0	0	0	0	-	NA	NA	NA	NA	-	9.5	9.6	9.8	9.9	10.2	9.9	10	9.6	10.4	10.1	9.9	9.8	10.1	10.2	9.8	9.7	10.2	10	10	10.6	9.4	9.5	9.6	9.4
THC0290_0788	938186	938767	1	CDS	NA		THC0290_v2_0842		Protein of unknown function precursor	NA	1799	A1795	B549	C143	582	0	0	0	0	-	NA	NA	NA	NA	-	9.3	9.4	10	9.7	10.2	10.3	9.8	11.9	9.9	10.4	9.6	9.6	12.3	12.6	11.1	10.9	12.6	12.6	13.2	13.3	9.3	9.8	9.4	9.7
THC0290_N_0578	938768	938895	1	Region	intra				new transcription segment	NA(CDS:THC0290_0789);NA(CDS:THC0290_0788)	1509	A1765	B546	C143	128	0	0	0	0	-	0	NA	NA	NA	-	6.6	8.2	7	8.3	8.1	7.6	8.6	8.6	9	9	6.7	6.8	11.2	12.8	10	8.5	10.7	11.6	11.7	10.8	7.4	6.6	7	7.7
THC0290_0789	938927	940153	1	CDS	NA		THC0290_v2_0843		Glu/Leu/Phe/Val dehydrogenase family protein	NA	3582	A578	B183	C44	1227	0	0	0	0	-	NA	NA	NA	NA	-	12.7	12.6	12.5	12.4	12	11.5	11.6	10.8	11.4	11.2	12.5	12.5	10.7	11	11	11.2	10.9	10.8	10.5	11.1	12.6	12.6	12.6	12.6
THC0290_N_0579	940174	940237	1	Region	5prime				new transcription segment	NA(CDS:THC0290_0790)	3583	A578	B183	C44	64	0	0	0	0	-	0	NA	NA	NA	-	13.3	13.3	13.2	13	12.8	12.3	12.4	11.5	11.8	12.1	13.2	13.2	11.4	11.8	11.7	11.8	11.9	11.5	11.7	12.6	13.4	13.4	13.2	13.2
THC0290_0790	940238	940999	1	CDS	NA		THC0290_v2_0844		Hypothetical protein	NA	3584	A578	B183	C44	762	0	0	0	0	-	NA	NA	NA	NA	-	12.1	12.1	12.2	11.9	11.7	11.3	11.2	10.2	10.4	10.8	12.1	12.1	10.3	10.5	10.8	11	10.6	10.3	10.5	10.9	12.2	12.3	12.1	12.1
THC0290_N_0580	941000	941283	1	Region	intra				new transcription segment	NA(CDS:THC0290_0791);NA(CDS:THC0290_0790)	4249	A667	B187	C46	284	0	0	0	0	-	0	NA	NA	NA	-	12.1	12	12	11.9	11.4	11.3	10.9	10.8	11	11.4	12.1	12.2	11.5	11.5	11.2	11.4	11.3	11.6	11.6	11.5	11.9	12.3	11.8	11.9
THC0290_0791	941284	942165	1	CDS	NA		THC0290_v2_0845		Protein of unknown function	NA	430	A1271	B425	C125	882	0	0	0	0	-	NA	NA	NA	NA	-	11.3	11.2	11	11	10.9	10.7	10.8	9.7	11.2	10.9	11.3	11.3	11.5	11.5	11.6	11.4	11.5	11.6	12.3	12.2	11.3	11.3	11.1	11.3
THC0290_N_0581	942166	942314	1	Region	repeated_region				new transcription segment	NA	70	A866	B262	C70	149	0	0	0	0	-	0	NA	NA	NA	-	10.2	9.9	9.2	9.3	8.7	9.3	8.6	9.2	9	9.6	9.7	9.7	9.9	9.6	9.4	9.6	9.3	9.5	10.4	11.2	10	10	9.8	10.2
THC0290_0792	942315	943517	1	CDS	NA		THC0290_v2_0846		Transposase IS256 family	NA	2778	A331	B122	C33	1203	1	1	0	0	THC0290_N_0582	NA	NA	NA	NA	-	11.3	11.3	11	10.9	10.3	10.3	9.8	10.4	10.1	10	11.2	11.3	10.6	10.5	10.3	10.2	10.4	10.7	10.8	11.4	11.4	11.4	11.1	11
THC0290_N_0582	943455	943570	-1	Region	3prime				new transcription segment	NA(CDS:THC0290_0793)	1693	A1646	B540	C143	116	1	0	1	0	THC0290_0792	0	NA	NA	NA	-	9.5	9.6	10	9.9	10.6	10.6	11.1	12.5	11.6	11.7	10.3	10.2	12	12.1	11.6	11.4	11	11.3	11.4	11.2	10	10.1	9.5	9.9
THC0290_0793	943571	944119	-1	CDS	NA		THC0290_v2_0847		Probable transmembrane protein of unknown function	NA	4118	A1088	B365	C107	549	0	0	0	0	-	NA	NA	NA	NA	-	9.8	9.8	11.6	11.7	12.8	12.8	13	13.8	13.2	13.2	12.4	12.3	11.8	11.6	12.3	12.6	10.9	11.1	10.2	8.2	10.4	10.3	10	10.2
THC0290_0794	944125	946380	-1	CDS	NA	fhuA	THC0290_v2_0848	fhuA	Probable TonB-dependent outer membrane ferrichrome-iron receptor precursor FhuA	NA	4119	A1088	B365	C107	2256	0	0	0	0	-	NA	NA	NA	NA	-	11.4	11.3	13	13	13.9	13.9	14.1	14	13.9	13.8	13.7	13.8	12.8	12.5	13.2	13.4	11.9	12	11	9.8	11.8	11.8	11.5	11.7
THC0290_flavo-1_0043	946961	947038	1	misc_RNA	NA				Flavo-1 RNA	NA	4344	A1069	B356	C105	78	0	0	0	0	-	NA	NA	NA	NA	-	4.8	5.2	4.9	5.3	5.5	4.6	6.7	7	5.5	5	5.2	5.2	3.9	3.9	3.9	4.9	3.9	4	5.3	5.2	5.1	5.2	5	4.9
THC0290_0795	947122	948195	1	CDS	NA	prfA	THC0290_v2_0849	prfA	Peptide chain release factor 1 (RF-1)	NA	2200	A976	B308	C84	1074	0	0	0	0	-	NA	NA	NA	NA	-	12.6	12.4	11.6	11.6	11.1	11	11.7	11.5	12.4	12.6	11.7	11.5	12.3	12.7	12.4	12.3	12.6	12.1	12.3	12.6	12.4	12.4	12.5	12.6
THC0290_N_0583	948196	948325	1	Region	intra				new transcription segment	NA(CDS:THC0290_0796);prfA(CDS:THC0290_0795)	2201	A976	B308	C84	130	0	0	0	0	-	0	NA	NA	NA	-	12.4	12.2	11.2	11.2	10.6	10.5	11.3	11.8	11.8	12.6	11.4	11.1	12.3	12.3	12.1	12	11.5	11.7	11.6	10.4	12.3	12.4	12.2	12.4
THC0290_0796	948326	950458	1	CDS	NA		THC0290_v2_0850		Probable outer membrane protein precursor, OmpA family	NA	3114	A639	B183	C44	2133	0	0	0	0	-	NA	NA	NA	NA	-	13.5	13.4	12.7	12.8	12.2	11.9	12.2	12.7	12.5	12.8	12.7	12.6	12.6	12.9	12.9	13	12.1	12	11.3	10.5	13.4	13.4	13.3	13.3
THC0290_N_0584	950459	950551	1	Region	3prime				new transcription segment	NA(CDS:THC0290_0796)	3947	A908	B282	C77	93	0	0	0	0	-	0	NA	NA	NA	-	11.1	11.7	11	11.3	10.5	10.6	10.8	12.5	11.7	12.9	10.4	10.7	12.7	11.6	11.8	11.5	11	11.9	12.6	9.6	11.4	11	11.7	11.3
THC0290_N_0585	950898	950969	-1	Region	3prime				new transcription segment	pepT(CDS:THC0290_0797)	10	A1844	B564	C146	72	0	0	0	0	-	0	NA	NA	NA	-	9.8	9.7	9.5	9.4	9.6	10.1	9.9	10.8	11.3	11.5	9.8	9.9	10.2	9.6	9.5	10	9.1	9.7	9.9	8.6	9.5	10.1	9.9	9.6
THC0290_0797	950970	952244	-1	CDS	NA	pepT	THC0290_v2_0851	pepT	Tripeptide aminopeptidase	NA	3708	A525	B180	C44	1275	0	0	0	0	-	NA	NA	NA	NA	-	12	12	11.7	11.4	10.9	11.3	10.8	10.5	11.2	11.4	11.8	11.7	10.9	10.8	10.9	11	10.9	10.9	10.9	11.2	12.1	12	12.2	12.4
THC0290_N_0586	952367	952448	-1	Region	3prime				new transcription segment	NA(CDS:THC0290_0798)	2646	A320	B120	C33	82	0	0	0	0	-	0	NA	NA	NA	-	10	9.8	9.7	9.2	9.3	9.4	9.6	10	7.9	8.9	9.8	9.6	8.9	8.5	9.2	9.3	9.8	9.8	11	11.7	10.1	10.2	9	9.7
THC0290_0798	952449	953249	-1	CDS	NA		THC0290_v2_0852		Hypothetical protein	NA	3033	A529	B180	C44	801	0	0	0	0	-	NA	NA	NA	NA	-	8.6	8.5	8.1	8	8.1	8.5	8.1	8.3	6.4	7.1	8.2	8.2	6.5	6.9	7.2	7.1	7.2	7.5	8.5	8.5	8.5	8.4	8	8.2
THC0290_0799	953303	954226	-1	CDS	NA	miaA	THC0290_v2_0853	miaA	tRNA isopentenyltransferase	NA	2533	A233	B83	C25	924	0	0	0	0	-	NA	NA	NA	NA	-	9.8	9.8	9.3	9.4	9.4	9.4	9.4	8.4	9	8.6	9.3	9.4	8.2	7.4	9	8.4	8.1	9	8.9	8.6	10.1	9.4	9.4	9.6
THC0290_N_0587	954227	954368	-1	Region	intra				new transcription segment	miaA(CDS:THC0290_0799);NA(CDS:THC0290_0800)	2527	A225	B83	C25	142	1	0	0	1	THC0290_flavo-1_0044	0	NA	NA	NA	-	9.6	9.7	9.6	9.6	9.8	10.3	10.1	7.5	9.5	9.4	9.7	9.3	9.8	9.4	9.5	9	9.2	9.9	9.5	7.6	9.9	9.3	9.4	9.6
THC0290_flavo-1_0044	954248	954327	1	misc_RNA	NA				Flavo-1 RNA	NA	1234	A1745	B546	C143	80	1	1	0	0	THC0290_N_0587	NA	NA	NA	NA	-	4.1	4	4.4	4.6	4.8	4.3	4.8	6.1	6.2	6	4.1	4.2	6	7.2	7.4	7.1	9.5	9.8	10.7	11.4	5.3	4	3.9	4.2
THC0290_0800	954369	955730	-1	CDS	NA		THC0290_v2_0854		Probable DNA polymerase III subunit	NA	2534	A233	B83	C25	1362	1	1	0	0	THC0290_N_0588	NA	NA	NA	NA	-	10.8	10.7	10.4	10.2	10.1	10.6	10.5	10	10.3	10.2	10.5	10.5	10	9.8	10.1	10.1	10	10.1	9.6	9.5	10.9	10.4	10.3	10.6
THC0290_N_0588	955247	955570	1	Region	indep	Rfp41			new transcription segment	NA	280	A1838	B563	C145	324	1	0	1	0	THC0290_0800	0	NA	NA	NA	-	5.3	5.3	5.3	5.5	6.2	6.8	6.6	9.1	7	7.2	5.6	5.3	7.7	5.4	5.8	5.7	7.3	8	8.6	4.8	5.3	5.4	4.5	5.7
THC0290_N_0589	955731	955842	-1	Region	intra				new transcription segment	NA(CDS:THC0290_0800);NA(CDS:THC0290_0801)	3094	A650	B183	C44	112	0	0	0	0	-	0	NA	NA	NA	-	9.8	9.9	9.6	9.5	9.6	9.3	9.6	10.5	8.8	8.9	9.6	9.7	9.1	9.6	9.2	9.4	9.1	9.3	9.3	8.6	9.9	9.9	9.7	9.9
THC0290_0801	955843	956211	-1	CDS	NA		THC0290_v2_0855		Protein of unknown function	NA	2630	A370	B141	C39	369	0	0	0	0	-	NA	NA	NA	NA	-	10.9	10.9	10.6	10.6	10.6	10.3	10.3	11.4	9.7	10	10.7	10.9	10.2	10.9	9.9	10.2	11.2	11.4	11	11.1	10.7	10.7	10.5	10.6
THC0290_0802	956244	956903	-1	CDS	NA		THC0290_v2_0856		Protein of unknown function	NA	3366	A601	B183	C44	660	0	0	0	0	-	NA	NA	NA	NA	-	11	10.8	10.6	10.5	10.3	10.2	10.3	10.7	8.8	9.2	10.6	10.7	8.7	8.6	9.4	9.4	9	8.8	8.5	8.7	10.6	10.6	10.6	10.7
THC0290_N_0590	956904	956987	-1	Region	intra				new transcription segment	NA(CDS:THC0290_0802);NA(CDS:THC0290_0803)	2639	A368	B140	C39	84	0	0	0	0	-	0	NA	NA	NA	-	9.6	9.6	9.4	9.5	9.4	9.1	9.4	9.8	8.3	8.4	9.5	9.6	8.8	9.6	9.4	8.9	7.8	8.1	8.5	10.4	9.7	9.3	9.7	9.8
THC0290_0803	956988	958220	-1	CDS	NA		THC0290_v2_0857		Protein of unknown function	NA	3372	A601	B183	C44	1233	0	0	0	0	-	NA	NA	NA	NA	-	11.8	11.7	11.6	11.5	11.5	11.6	11.5	10.9	10.7	10.7	11.8	11.8	10	9.3	10.5	10.6	9.7	9.8	9.5	9.7	11.7	11.4	11.7	11.7
THC0290_0804	958250	959137	-1	CDS	NA		THC0290_v2_0858		3-hydroxyacyl-CoA dehydrogenase family protein	NA	3536	A605	B183	C44	888	0	0	0	0	-	NA	NA	NA	NA	-	12.1	12.1	12.1	12.1	12.1	12.1	12.3	10.3	11.9	11.6	12.2	12.1	10.9	10.6	11.2	11.3	10.8	10.7	10.6	10.5	12.1	11.6	12.2	12.1
THC0290_0805	959164	960129	-1	CDS	NA		THC0290_v2_0859		Putative oxidoreductase	NA	2487	A212	B79	C25	966	0	0	0	0	-	NA	NA	NA	NA	-	11.2	11.3	11.3	11.3	11.4	11.2	11.5	10.8	11.6	11.3	11.4	11.4	10.6	10.7	10.8	10.9	10.5	10.6	10.9	11.3	11.1	11.1	11.4	11.2
THC0290_0806	960228	960869	1	CDS	NA	pcm	THC0290_v2_0860	pcm	Protein-L-isoaspartate(D-aspartate) O-methyltransferase	NA	2645	A311	B117	C33	642	0	0	0	0	-	NA	NA	NA	NA	-	10.9	10.9	10.8	10.7	10.6	10.8	10.2	10.8	10.3	10.2	10.9	10.9	10.5	10.7	9.6	9.8	11.2	11.1	10.7	11.4	10.8	11	11	10.9
THC0290_N_0591	960870	961013	1	Region	3prime				new transcription segment	pcm(CDS:THC0290_0806)	2998	A414	B156	C44	144	0	0	0	0	-	0	NA	NA	NA	-	10.9	10.8	10.6	10.6	10.4	10.8	10.5	10.9	10.2	10.3	10.7	10.8	10.3	10.4	9.2	9.4	10	10.1	9.9	8.2	10.7	11	10.7	10.8
THC0290_0807	961146	962078	1	CDS	NA	ppiC	THC0290_v2_0861	ppiC	Probable peptidyl-prolyl cis-trans isomerase PpiC	NA	2515	A215	B80	C25	933	0	0	0	0	-	NA	NA	NA	NA	-	13.1	13.1	13	13	13.2	12.6	13.1	11.3	13.7	13.6	12.9	13	12.5	12.9	13.1	13.2	12.9	12.5	12.5	12.6	13.1	13.3	13.2	13.1
THC0290_N_0592	962079	962138	1	Region	3prime				new transcription segment	ppiC(CDS:THC0290_0807)	4396	A1190	B409	C123	60	0	0	0	0	-	0	NA	NA	NA	-	7.7	7.3	7.4	7.3	7.7	7.1	8.7	7.6	10.3	9.5	7.6	7.7	8.4	9.5	8.7	8.9	7.3	7.2	6.7	6	7	7.8	7.5	7.4
THC0290_0808	962645	964048	1	CDS	NA		THC0290_v2_0862		Probable transmembrane protein of unknown function	NA	1873	A1749	B546	C143	1404	0	0	0	0	-	NA	NA	NA	NA	-	9.7	9.8	9.3	9.4	10	10.2	10.4	10.9	11	10.9	9.4	9.3	10.8	10.9	10.9	10.9	10.7	10.8	11.1	11.3	9.8	10	9.9	9.8
THC0290_0809	964041	965519	1	CDS	NA		THC0290_v2_0863		Probable sugar O-acetyltransferase	NA	397	A1267	B423	C125	1479	1	1	0	0	THC0290_N_0593	NA	NA	NA	NA	-	9.5	9.3	8.8	8.9	9.3	9.5	9.7	9.5	9.8	9.8	9	8.7	9	8.9	9.5	9.7	9.5	9	9.4	9.4	9.3	9.5	9.3	9.4
THC0290_N_0593	965318	965499	-1	Region	3prime				new transcription segment	NA(CDS:THC0290_0810)	1330	A1747	B546	C143	182	1	0	1	0	THC0290_0809	0	NA	NA	NA	-	8.2	8	7.6	8	7.9	7.8	8.8	7.6	10.1	9.4	7.8	7.6	9	11.5	10.3	9.3	12.3	10.2	11.2	13.1	8.3	7.5	8.2	7.9
THC0290_0810	965500	966744	-1	CDS	NA		THC0290_v2_0864		Protein of unknown function	NA	1009	A1365	B469	C136	1245	1	1	0	0	THC0290_N_0594	NA	NA	NA	NA	-	8.1	8.2	8.3	8	8.5	8.8	8.7	8.8	9.5	9.6	8.5	8.2	10	9.9	9	9	8.8	9.2	9.2	9	8.1	8.3	8.1	8.1
THC0290_N_0594	965520	966173	1	Region	3prime				new transcription segment	NA(CDS:THC0290_0809)	398	A1268	B423	C125	654	1	0	1	0	THC0290_0810	1	965586,965657,+	1	72	LKNVLNLGVVGFYFSILLLLLIG	7.4	7.2	6.7	6.9	7.2	6.7	7.7	7.3	7.6	7.7	6.7	6.6	6.2	4.4	6.6	6.8	6.9	7.7	7.6	6.1	7.6	7.7	7.3	7.9
THC0290_N_0595	966766	966843	1	Region	5prime				new transcription segment	NA(CDS:THC0290_0811)	1871	A1764	B546	C143	78	0	0	0	0	-	0	NA	NA	NA	-	10	10	10.6	10.3	10.6	12	11.1	11.9	12	13.5	10.5	10.7	14.1	12.7	12.8	13.1	12.8	13.6	15.2	13.6	10.2	10.6	9.9	10.2
THC0290_0811	966844	967311	1	CDS	NA		THC0290_v2_0865		Putative muramidase	NA	1907	A1243	B419	C125	468	0	0	0	0	-	NA	NA	NA	NA	-	11.1	11.6	11.7	12	12.2	11.7	12	12.9	12.9	13	11.6	12	13.7	13.6	13.7	13.8	13.4	13.2	14.1	14.3	11.4	11.6	11.3	11.1
THC0290_N_0596	967312	967505	1	Region	3prime				new transcription segment	NA(CDS:THC0290_0811)	1908	A1243	B419	C125	194	0	0	0	0	-	0	NA	NA	NA	-	10.2	10.2	10.3	10.7	11.1	10.9	11.1	12.1	11.5	11.4	10.2	10.3	11.8	11.8	11.9	12.3	11.6	11.5	12.3	12.6	10.1	10	10	9.7
THC0290_0812	967831	968283	1	CDS	NA	fur	THC0290_v2_0866	fur	Ferric iron uptake transcription regulator, Fur	NA	1868	A1764	B546	C143	453	0	0	0	0	-	NA	NA	NA	NA	-	11.4	11.4	11	11.1	11.4	11.5	11.3	11.9	12.2	12.5	11.1	11.2	12.7	12.4	12.3	12.4	12.4	12.9	12.4	11.8	11.2	11.5	11.1	11.3
THC0290_N_0597	968284	968363	1	Region	intra				new transcription segment	purA(CDS:THC0290_0813);fur(CDS:THC0290_0812)	294	A1215	B416	C125	80	0	0	0	0	-	0	NA	NA	NA	-	12.3	12.5	12.5	12.3	12.6	12.6	12.6	12.9	12.9	12.9	12.6	12.5	13.2	13	13.1	13.1	12.9	12.9	12.5	12.4	12.6	12.8	12.7	12.5
THC0290_0813	968364	969635	1	CDS	NA	purA	THC0290_v2_0867	purA	Adenylosuccinate synthase	NA	295	A1215	B416	C125	1272	0	0	0	0	-	NA	NA	NA	NA	-	12.2	12.3	11.8	11.9	11.9	11.8	11.9	12.1	12.2	11.8	11.9	11.8	12.1	12.1	12.3	12.4	11.9	12	11.7	11.2	12.1	12.2	12.7	12.4
THC0290_0814	969702	970469	-1	CDS	NA		THC0290_v2_0868		Protein of unknown function precursor	NA	690	A1231	B419	C125	768	0	0	0	0	-	NA	NA	NA	NA	-	9.6	9.8	9.5	9.5	9.3	9.3	9.9	9.3	10.1	10.3	9.4	9.7	9.9	9.8	10.3	10.4	10.1	9.8	10.7	11	9.6	9.6	10.6	10.4
THC0290_N_0598	970586	970616	-1	Region	3prime				new transcription segment	oxaA(CDS:THC0290_0815)	-1	NA	NA	NA	31	0	0	0	0	-	0	NA	NA	NA	-	NA	NA	NA	NA	NA	NA	NA	NA	NA	NA	NA	NA	NA	NA	NA	NA	NA	NA	NA	NA	NA	NA	NA	NA
THC0290_0815	970617	972518	-1	CDS	NA	oxaA	THC0290_v2_0869	oxaA	Inner membrane protein OxaA	NA	2814	A800	B244	C67	1902	0	0	0	0	-	NA	NA	NA	NA	-	12.4	12.3	11.9	11.6	10.9	11.4	11.4	11.6	10.6	10.4	11.8	11.7	11	11	11.6	11.6	11.1	11	10.2	10.2	12.4	12.6	12.8	13
THC0290_N_0599	972519	972611	-1	Region	intra				new transcription segment	oxaA(CDS:THC0290_0815);pyrG(CDS:THC0290_0816)	2813	A800	B244	C67	93	0	0	0	0	-	0	NA	NA	NA	-	11.8	11.8	11.1	11	10.7	10.8	11.1	10	11.1	10.9	11.3	11.1	11.3	11.3	11.7	11.6	11.5	11.3	10.9	8.7	11.9	11.7	12.1	12.2
THC0290_0816	972612	974225	-1	CDS	NA	pyrG	THC0290_v2_0870	pyrG	CTP synthase	NA	2815	A800	B244	C67	1614	0	0	0	0	-	NA	NA	NA	NA	-	12.3	12.3	11.7	11.6	11.3	11.4	11.5	11.4	11.4	11.2	11.8	11.7	11.3	10.9	11.4	11.6	11.4	11	11.4	10.9	12.4	12.3	12.7	12.7
THC0290_0817	974932	975162	-1	CDS	NA		THC0290_v2_0872		Protein of unknown function	NA	4284	A674	B189	C46	231	0	0	0	0	-	NA	NA	NA	NA	-	11.1	11.3	11.3	11.1	10.6	11.1	10.2	10.7	9.2	9.6	11.6	11.5	10.4	9.4	10.6	10.6	9.5	10.4	10.7	10.4	11.2	11.3	11.3	11.5
THC0290_N_0600	975163	975241	-1	Region	intra				new transcription segment	NA(CDS:THC0290_0817);osmC(CDS:THC0290_0818)	4283	A674	B189	C46	79	0	0	0	0	-	0	NA	NA	NA	-	10.1	9.8	10.1	9.8	9.5	9.6	9.3	9.6	8.1	8.5	10.2	10.5	9.1	8.1	9.6	9.7	8.9	9.2	9.1	7.8	10.1	9.8	10.2	10.5
THC0290_0818	975242	975646	-1	CDS	NA	osmC	THC0290_v2_0873	osmC	Putative stress-induced protein OsmC	NA	4285	A674	B189	C46	405	0	0	0	0	-	NA	NA	NA	NA	-	11	10.8	11	10.8	10.2	10.5	10.1	10.1	9.3	9.2	11.1	11	9.9	9.6	10.2	10.3	10	10.2	10.4	10.4	10.9	10.6	10.9	11.3
THC0290_0819	975646	977562	-1	CDS	NA		THC0290_v2_0874		LysM domain protein precursor	NA	4282	A674	B189	C46	1917	1	1	0	0	THC0290_N_0601	NA	NA	NA	NA	-	10.2	10.2	10.5	10.3	9.8	10	9.8	9.7	8.7	9.1	10.5	10.5	9.9	9.5	10.2	10.1	9.7	10.3	10.6	9.3	10.4	9.9	10.4	10.7
THC0290_N_0601	976566	976680	1	Region	indep	Rfp42			new transcription segment	NA	337	A1248	B419	C125	115	1	0	1	0	THC0290_0819	0	NA	NA	NA	-	5.1	4.8	5.1	5.5	5.8	6.6	6.1	9	6.3	7.5	5.2	4.8	9.1	8.3	7.6	7.5	3.9	7.8	6.7	8.2	4.6	5.4	4.5	4.9
THC0290_N_0602	977563	977781	-1	Region	intra				new transcription segment	NA(CDS:THC0290_0819);NA(CDS:THC0290_0820)	414	A1244	B419	C125	219	0	0	0	0	-	0	NA	NA	NA	-	9.2	9.3	9.3	9.4	9.1	9.5	9.1	10	9.5	9.7	9.4	9.4	10.2	9.8	9.9	9.6	9.9	10	11	10.3	9.3	9.1	9.5	9.7
THC0290_0820	977782	979488	-1	CDS	NA		THC0290_v2_0875		Protein of unknown function	NA	3963	A749	B218	C58	1707	0	0	0	0	-	NA	NA	NA	NA	-	10	10.1	10.2	10	9.7	9.9	9.6	9.8	8	9.8	10.1	10.2	10.2	9.8	10	9.7	10.3	10.2	10.4	11.1	10.2	9.7	10.8	10.6
THC0290_N_0603	979489	979622	-1	Region	3prime				new transcription segment	guaA(CDS:THC0290_0821)	2212	A979	B309	C84	134	0	0	0	0	-	0	NA	NA	NA	-	7.1	7.6	6.6	7	7.1	6.7	7.3	8.9	8.6	7.6	7	6.6	8	8.6	8.3	7.6	9.1	8.4	9	6.9	7.2	6.4	7.4	7.2
THC0290_0821	979623	981152	-1	CDS	NA	guaA	THC0290_v2_0876	guaA	GMP synthase [glutamine-hydrolyzing]	NA	4162	A1116	B373	C109	1530	0	0	0	0	-	NA	NA	NA	NA	-	12.1	12.3	12.5	12.3	12.8	13	13.2	12.5	13.3	13.1	12.4	12.3	12.1	11.7	12.2	12.3	12	12.1	11.9	11.7	12.3	11.9	12.1	11.6
THC0290_0822	981245	982255	1	CDS	NA	fjo19	THC0290_v2_0877	fjo19	Protein of unknown function Fjo19	NA	3498	A609	B183	C44	1011	0	0	0	0	-	NA	NA	NA	NA	-	10.8	10.7	10.4	10.4	9.9	9.5	9.5	10.2	9.4	9.2	10.6	10.7	9.1	9.4	9.2	9.4	9.1	9.5	9.6	9.3	10.7	10.6	10.9	10.9
THC0290_0823	982263	982829	1	CDS	NA	gldI	THC0290_v2_0878	gldI	Gliding motility lipoprotein precursor GldI	NA	3872	A887	B276	C76	567	0	0	0	0	-	NA	NA	NA	NA	-	11.3	11.4	11.2	11.2	10.8	10.6	10.5	10.5	10.6	10.5	11.3	11.5	11.4	11.4	10.9	10.6	12.2	12	11.9	11.9	11.4	11.2	11.6	11.6
THC0290_0824	982856	983950	1	CDS	NA	ppiA	THC0290_v2_0879	ppiA	Probable peptidyl-prolyl cis-trans isomerase precursor PpiA	NA	3396	A601	B183	C44	1095	0	0	0	0	-	NA	NA	NA	NA	-	13.2	13.1	13	13.1	12.6	12.4	12	11.4	11.1	11.3	13.2	13.2	11.6	11.5	11.5	11.6	11.4	11.5	11.1	11	13	13	12.9	12.8
THC0290_0825	983971	985056	1	CDS	NA	ppiB	THC0290_v2_0880	ppiB	Probable peptidyl-prolyl cis-trans isomerase precursor PpiB	NA	3397	A601	B183	C44	1086	0	0	0	0	-	NA	NA	NA	NA	-	13.3	13.2	13.3	13.1	12.6	12.1	11.7	11.7	10.5	10.4	13.1	13.2	10.8	10.8	11.1	11.3	10.5	10.3	10.1	9.6	13	13	13	12.9
THC0290_N_0604	985057	985110	1	Region	3prime				new transcription segment	ppiB(CDS:THC0290_0825)	2346	A37	B22	C11	54	0	0	0	0	-	0	NA	NA	NA	-	6.5	6.4	6.2	6.2	6.1	6.1	5.4	8.5	5.6	5.3	6.7	6.8	6.6	7.1	5.8	5.8	4.9	6.3	4.2	4.6	5.5	6.4	5.7	5.4
THC0290_0826	985132	985569	-1	CDS	NA		THC0290_v2_0881		Protein of unknown function	NA	2280	A989	B312	C84	438	0	0	0	0	-	NA	NA	NA	NA	-	9.8	10.3	10	9.8	9.8	9.9	9.6	10.6	10.4	10.7	9.8	10.1	9.9	10.4	9.9	10.4	10.6	10.4	10.5	10.2	10.1	10.5	10.9	10.7
THC0290_N_0605	985642	985689	-1	Region	3prime				new transcription segment	NA(CDS:THC0290_0827)	-1	NA	NA	NA	48	0	0	0	0	-	0	NA	NA	NA	-	NA	NA	NA	NA	NA	NA	NA	NA	NA	NA	NA	NA	NA	NA	NA	NA	NA	NA	NA	NA	NA	NA	NA	NA
THC0290_0827	985690	987930	-1	CDS	NA		THC0290_v2_0882		Probable M1 family aminopeptidase precursor	NA	2854	A545	B180	C44	2241	0	0	0	0	-	NA	NA	NA	NA	-	13	12.9	13	12.8	12.2	12.2	12.5	11.2	11.4	11.5	13	12.9	12.1	12.2	12.2	12.4	12.6	12.4	12.1	12.1	13.1	13.3	13.4	13.5
THC0290_N_0606	988003	988050	-1	Region	3prime				new transcription segment	NA(CDS:THC0290_0828)	-1	NA	NA	NA	48	0	0	0	0	-	0	NA	NA	NA	-	NA	NA	NA	NA	NA	NA	NA	NA	NA	NA	NA	NA	NA	NA	NA	NA	NA	NA	NA	NA	NA	NA	NA	NA
THC0290_0828	988051	988332	-1	CDS	NA		THC0290_v2_0883		Protein of unknown function	NA	1751	A1762	B546	C143	282	0	0	0	0	-	NA	NA	NA	NA	-	9.7	9.8	11.4	11.7	12.9	14.2	13.2	14.4	13.8	14.5	11.5	11.7	14.2	13.9	13.2	13.4	14.3	15.1	14.9	14.6	9.5	9.9	9.8	9.6
THC0290_0829	988595	989146	1	CDS	NA		THC0290_v2_0884		Probable ribosomal-protein-amino-adic N-acetyltransferase	NA	1758	A1762	B546	C143	552	0	0	0	0	-	NA	NA	NA	NA	-	9.5	9.6	10.5	10.4	10.8	10.7	10.5	11.3	11.1	10.8	10.8	10.9	11.9	12.1	11	11.1	12.7	12.9	12.9	13.3	9.3	9.8	9.8	9.2
THC0290_0830	989155	989379	-1	CDS	NA		THC0290_v2_0885		Protein of unknown function	NA	963	A1671	B543	C143	225	0	0	0	0	-	NA	NA	NA	NA	-	7.7	7.7	7.1	7.2	7.8	8.6	8.5	9.8	9	10.2	6.9	7.2	10.1	9	8.3	8.3	9	10.6	10.9	9	8	7.9	8	8.4
THC0290_0831	989444	989896	1	CDS	NA	smpB	THC0290_v2_0886	smpB	SsrA-binding protein	NA	2421	A778	B237	C67	453	0	0	0	0	-	NA	NA	NA	NA	-	11.6	11.6	11.3	11.1	11.1	11.1	10.9	12	11.6	11.7	11.4	11.3	11.5	11.5	11.4	11.4	11.1	11.2	11	10.3	11.7	12.1	11.6	11.9
THC0290_N_0607	989897	990214	1	Region	3prime				new transcription segment	smpB(CDS:THC0290_0831)	297	A1217	B416	C125	318	0	0	0	0	-	0	NA	NA	NA	-	10.1	10.2	9.3	9.3	9.1	9.4	9.2	11.6	10.2	10.5	9.8	9.6	11	10.8	10.6	10.9	9.9	10.4	10.6	8.1	10	10.7	10.2	10.4
THC0290_0832	990238	992370	-1	CDS	NA	dcp2	THC0290_v2_0887	dcp2	Peptidyl-dipeptidase precursor Dcp2	NA	4378	A1796	B549	C143	2133	0	0	0	0	-	NA	NA	NA	NA	-	8.8	8.8	10.1	10	10	9.9	10.7	10.9	10.1	9.8	9.6	9.9	10.7	11	11.1	11.1	10.2	10.2	10	10	9.1	8.7	9.9	10
THC0290_0833	992645	993088	1	CDS	NA		THC0290_v2_0888		Protein of unknown function	NA	131	A848	B256	C70	444	0	0	0	0	-	NA	NA	NA	NA	-	9.5	9.7	9.3	9.3	8.8	8.4	8.8	8.5	9.2	8.9	9.2	9.3	9.1	9.4	8.9	9	9.6	9.3	10.3	10.5	9.5	9.6	9.9	10
THC0290_flavo-1_0045	993083	993162	1	misc_RNA	NA				Flavo-1 RNA	NA	2389	A392	B150	C42	80	0	0	0	0	-	NA	NA	NA	NA	-	7.8	7.9	7.6	7.7	7.2	6.9	7.3	7.4	8.1	7.9	7.8	7.7	6.9	7.7	7.7	7.5	4.5	6.6	7.5	7.4	7.7	7.7	8	8.3
THC0290_N_0608	993089	993197	1	Region	intra				new transcription segment	trmD(CDS:THC0290_0834);NA(CDS:THC0290_0833)	845	A1539	B521	C143	109	0	0	0	0	-	0	NA	NA	NA	-	8.3	8.2	7.8	7.9	7.4	7.1	7.5	7.5	8.4	8.2	8.1	8	7.5	9.1	8.1	8.2	8.9	7.4	8.9	10.7	8	8	8.3	8.5
THC0290_0834	993214	993891	1	CDS	NA	trmD	THC0290_v2_0889	trmD	tRNA (Guanine-N(1)-methyltransferase	NA	1855	A1510	B519	C143	678	0	0	0	0	-	NA	NA	NA	NA	-	11.1	11.2	11	11.2	11.2	10.7	11.2	11.9	11.8	11.5	10.9	11.2	11.5	11.9	11.7	11.5	11.3	11.6	11.6	11.7	11	11.1	11.4	11.3
THC0290_N_0609	993892	993972	1	Region	intra				new transcription segment	rplS(CDS:THC0290_0835);trmD(CDS:THC0290_0834)	2190	A952	B302	C82	81	0	0	0	0	-	0	NA	NA	NA	-	7.9	7.6	7.6	7.6	8	7.3	8.6	9.6	9.7	9	7.7	7.9	9	9.5	9.6	9.7	8.6	7.3	4.2	4	7.7	7.8	7.9	8.1
THC0290_N_0610	993974	994040	1	Region	5prime				new transcription segment	rplS(CDS:THC0290_0835)	3953	A911	B282	C77	67	0	0	0	0	-	0	NA	NA	NA	-	13.9	13.9	13.8	13.6	13.4	15.2	13.7	14.5	14.3	15.6	14	13.8	16.1	14.4	14.1	14.1	14.6	15.4	15.3	14.2	14	14.5	14.2	14.3
THC0290_0835	994041	994391	1	CDS	NA	rplS	THC0290_v2_0890	rplS	50S ribosomal protein L19	NA	3950	A910	B282	C77	351	0	0	0	0	-	NA	NA	NA	NA	-	14	14.1	13.7	13.7	13.2	13.6	13.6	15	14.5	14.3	13.7	13.5	14.4	14.5	14	14	14.8	14.7	14.2	14	13.9	14.5	14.1	14.3
THC0290_N_0611	994392	994436	1	Region	3prime				new transcription segment	rplS(CDS:THC0290_0835)	-1	NA	NA	NA	45	0	0	0	0	-	0	NA	NA	NA	-	NA	NA	NA	NA	NA	NA	NA	NA	NA	NA	NA	NA	NA	NA	NA	NA	NA	NA	NA	NA	NA	NA	NA	NA
THC0290_N_0612	994437	994783	1	Region	3prime-PT				new transcription segment	NA	2032	A1732	B546	C143	347	0	0	0	0	-	0	NA	NA	NA	-	8.7	8.5	7.6	7.5	6.9	6.8	7.3	8.9	8.8	8.6	7.8	7.9	10.1	11.1	10.2	10	10.3	9.9	9.9	9.9	8.6	9.2	8.7	9.2
THC0290_N_0613	994785	994824	1	Region	5prime				new transcription segment	icd(CDS:THC0290_0836)	-1	NA	NA	NA	40	0	0	0	0	-	0	NA	NA	NA	-	NA	NA	NA	NA	NA	NA	NA	NA	NA	NA	NA	NA	NA	NA	NA	NA	NA	NA	NA	NA	NA	NA	NA	NA
THC0290_0836	994825	996051	1	CDS	NA	icd	THC0290_v2_0893	icd	Isocitrate dehydrogenase (NADP+)	NA	2567	A257	B91	C27	1227	0	0	0	0	-	NA	NA	NA	NA	-	13.8	13.9	14.2	14.2	14.3	14	13.7	14.5	13.4	13.4	14.2	14.3	13.1	13.3	13.3	13.3	13	12.9	12.4	12.9	13.7	13.7	13.9	13.8
THC0290_N_0614	996052	996137	1	Region	3prime				new transcription segment	icd(CDS:THC0290_0836)	-1	NA	NA	NA	86	0	0	0	0	-	0	NA	NA	NA	-	NA	NA	NA	NA	NA	NA	NA	NA	NA	NA	NA	NA	NA	NA	NA	NA	NA	NA	NA	NA	NA	NA	NA	NA
THC0290_N_0615	996138	998041	1	Region	3prime-PT				new transcription segment	NA	2026	A1535	B521	C143	1904	2	0	2	0	THC0290_0837;THC0290_0838	1	996268,996348,+	0.899	81	MYSIMYYLRNRKGDIGMLKRGKDKTL	6.7	6.6	7	6.7	6.8	6.8	6.6	7.7	7.9	7.5	6.4	6.3	7.1	9.1	8.1	7.5	9.2	7.3	8.7	10.3	6.9	6.6	6.9	7.5
THC0290_0837	996345	997619	-1	CDS	NA	wzxE	THC0290_v2_0894	wzxE	Putative lipopolysaccharide biosynthesis protein WzxE	NA	2612	A327	B122	C33	1275	1	1	0	0	THC0290_N_0615	NA	NA	NA	NA	-	8.2	8.2	7.2	7.1	6.8	6.8	6.6	8.3	6.7	5.5	7.8	7.5	4.1	3.9	5.3	5.7	4	5	7.8	8.8	7.7	8.2	7.2	7.5
THC0290_0838	997620	998723	-1	CDS	NA		THC0290_v2_0895		Probable aminotransferase involved in lipopolysaccharide biosynthesis	NA	2613	A327	B122	C33	1104	1	1	0	0	THC0290_N_0615	NA	NA	NA	NA	-	10	10.2	9.6	9.5	9	8.9	8.7	8.7	8	7.8	9.9	9.9	8.1	8.5	8.4	8.3	8.3	8.1	8.7	9.9	10.2	10.1	9.6	9.8
THC0290_0839	998720	999697	-1	CDS	NA		THC0290_v2_0896		Protein of unknown function	NA	2417	A779	B237	C67	978	0	0	0	0	-	NA	NA	NA	NA	-	10.5	10.5	9.8	9.6	9.4	9.7	9.6	10.9	9.9	10.4	10.4	10.3	10.4	10.5	9.9	9.8	10.1	10.1	10.5	9.2	10.7	10.8	9.9	10.2
THC0290_N_0616	999713	999921	-1	Region	intra				new transcription segment	NA(CDS:THC0290_0839);NA(CDS:THC0290_0840)	4306	A1007	B320	C87	209	0	0	0	0	-	0	NA	NA	NA	-	8.9	8.7	7.8	8.2	7.9	7.9	8.2	9.5	8.1	8	8.1	8	8.2	8.5	8.5	8	7.3	8	9.2	9	8.5	8.7	8.1	8.5
THC0290_0840	999922	1000527	-1	CDS	NA		THC0290_v2_0897		Probable transmembrane protein of unknown function	NA	586	A1515	B520	C143	606	0	0	0	0	-	NA	NA	NA	NA	-	9.9	10	9.3	9.6	9.8	10.1	10.1	10.9	10.6	10.6	9.4	9.3	10	10.2	10	10.1	10.1	10	10.3	10.1	9.9	10.3	9.6	9.9
THC0290_0841	1000821	1001609	1	CDS	NA		THC0290_v2_0898		Probable tRNA/rRNA methyltransferase	NA	3697	A448	B166	C44	789	0	0	0	0	-	NA	NA	NA	NA	-	10.9	10.9	10.9	10.7	10.4	11.3	10.6	8.8	9.9	10.3	11.2	10.5	9.8	9.2	9.6	8.8	10.2	9.9	8.9	9.7	11.3	10.4	11.2	11.5
THC0290_flavo-1_0046	1001659	1001743	-1	misc_RNA	NA				Flavo-1 RNA	NA	2024	A1740	B546	C143	85	0	0	0	0	-	NA	NA	NA	NA	-	3.9	4.6	3.9	4.9	4.8	4.1	4.3	4	6.3	5.2	4	4.3	5.6	7.1	5.3	5.2	9.1	6.6	9.5	10.8	4.2	4	4.5	3.9
THC0290_0842	1001835	1004054	1	CDS	NA	relA	THC0290_v2_0899	relA	GTP diphosphokinase	NA	603	A1564	B526	C143	2220	0	0	0	0	-	NA	NA	NA	NA	-	11.5	11.7	12.1	12.2	12.5	13	12.9	11.7	13.3	13.3	12.3	12.1	13.4	12.9	12.8	12.5	13.1	13.4	13.3	13	11.7	11.3	11.2	11
THC0290_N_0617	1004055	1004461	1	Region	3prime				new transcription segment	relA(CDS:THC0290_0842)	4312	A1178	B404	C122	407	1	0	1	0	THC0290_0843	0	NA	NA	NA	-	6.8	6.7	6.5	6.8	7.4	8.1	8	10.1	6.6	7.3	7.1	6.7	8.6	8.1	6.6	7.5	6.3	7.4	5.7	3.9	6.9	7.4	5.6	6.6
THC0290_0843	1004237	1005373	-1	CDS	NA	wbsE	THC0290_v2_0900	wbsE	Putative glycosyl transferase WbsE	NA	887	A1465	B506	C142	1137	1	1	0	0	THC0290_N_0617	NA	NA	NA	NA	-	8.1	8.2	7.7	7.7	7.1	7.2	6.8	7.7	8.1	8.4	7.8	7.8	8.4	8.7	7.3	7.5	8.9	9.1	8.4	9.8	7.9	8	7.9	7.5
THC0290_0844	1005418	1006515	1	CDS	NA		THC0290_v2_0901		Glycosyl transferase, group 1 family protein	NA	1712	A1757	B546	C143	1098	0	0	0	0	-	NA	NA	NA	NA	-	9.6	9.8	9.9	9.9	10	10.1	9.7	10.6	10.6	10.5	10.2	10.3	10.9	11.2	10.6	10.5	10.6	11	10.9	10.8	9.6	9.9	9.5	9.1
THC0290_0845	1006516	1006935	1	CDS	NA		THC0290_v2_0902		Protein of unknown function	NA	1518	A1765	B546	C143	420	0	0	0	0	-	NA	NA	NA	NA	-	9	9.3	9.4	9.7	10	9.9	9.8	10.4	10.4	10.2	9.6	9.8	10.8	11	10.1	10	10.6	10.8	10.6	10.5	9.1	9.3	9.3	8.8
THC0290_0846	1006906	1007832	-1	CDS	NA		THC0290_v2_0903		Glycosyl transferase, group 2 family protein	NA	2651	A46	B26	C13	927	1	1	0	0	THC0290_N_0618	NA	NA	NA	NA	-	8.5	8.5	8.1	8	7.5	7.7	7	8.6	7.3	7.8	8.1	8.3	8.5	8.3	7.7	8	7.2	8	8.3	8.9	8.4	8.6	7.9	8.1
THC0290_N_0618	1006936	1007642	1	Region	3prime				new transcription segment	NA(CDS:THC0290_0845)	177	A1184	B406	C122	707	1	0	1	0	THC0290_0846	0	NA	NA	NA	-	7	6.6	7.2	7.4	7.5	7.4	7.1	9.2	7.2	7.5	7.4	7.4	8.2	8.1	7.2	7.1	6.4	6.9	8.4	6	7	7.2	6.8	6.6
THC0290_0847	1007833	1008720	-1	CDS	NA		THC0290_v2_0904		Glycosyl transferase, group 2 family protein	NA	3890	A1470	B507	C142	888	0	0	0	0	-	NA	NA	NA	NA	-	9.9	9.9	9.9	9.8	9.8	9.8	9.7	10.3	9.8	9.6	9.8	10	10	10.4	9.7	9.7	10.6	10.3	10.7	11	10	10	9.6	9.7
THC0290_0848	1008755	1009228	-1	CDS	NA	yydA	THC0290_v2_0905	yydA	Protein of unknown function YydA	NA	921	A1619	B535	C143	474	0	0	0	0	-	NA	NA	NA	NA	-	9.2	9.2	9.1	9.2	9.3	9.2	9.3	10.4	10	10.1	8.9	9.1	9.9	10	9.4	9.4	10.4	10.7	11.3	10.3	9.3	9	8.8	8.4
THC0290_0849	1009303	1009518	-1	CDS	NA		NA		Hypothetical transmembrane protein	NA	2741	A501	B175	C44	216	0	0	0	0	-	NA	NA	NA	NA	-	7.3	7.4	6.5	6.4	6	6.2	5.7	6.7	6	6.2	6.8	6.3	6.7	6.2	4.7	4.7	4.5	3.9	4.8	4.1	7.6	7.5	7.9	7.9
THC0290_0850	1009520	1009939	-1	CDS	NA	yjeB	THC0290_v2_0906	yjeB	Protein of unknown function YjeB	NA	3880	A894	B277	C76	420	1	1	0	0	THC0290_N_0619	NA	NA	NA	NA	-	7.6	7.6	7.1	7.1	6.7	6.8	6.1	6.8	7.3	7.2	7.2	7.1	8.6	9.2	7.1	6.7	8.8	8.8	8.4	6.7	7.8	7.7	8	7.5
THC0290_N_0619	1009763	1009899	1	Region	indep	Rfp43			new transcription segment	NA	697	A1839	B563	C145	137	1	0	1	0	THC0290_0850	0	NA	NA	NA	-	4.1	3.9	3.9	3.9	3.9	5.2	3.9	7.4	5	6.5	4	4	6.4	4	3.9	4.2	4	3.9	8	3.9	4	4.6	3.9	3.9
THC0290_0851	1009947	1011152	-1	CDS	NA	hmp	THC0290_v2_0907	hmp	Nitric oxide dioxygenase	NA	3816	A936	B294	C81	1206	0	0	0	0	-	NA	NA	NA	NA	-	7.3	7.4	7.3	7.4	7.4	7.5	7.3	7.5	7.7	8.5	7.5	7.4	9.1	9.8	8.6	8.6	9.3	9	6	8.9	7.4	7.2	7.3	7.3
THC0290_0852	1011355	1012212	1	CDS	NA	nadC	THC0290_v2_0908	nadC	Nicotinate-nucleotide diphosphorylase (carboxylating)	NA	3711	A525	B180	C44	858	0	0	0	0	-	NA	NA	NA	NA	-	11.1	11.2	10.7	10.7	9.8	9.7	9.2	9	9.7	9.7	10.9	10.9	9.8	10	9.4	9.6	10	10	10.2	10.8	10.9	11	10.9	10.7
THC0290_0853	1012228	1013175	1	CDS	NA	yfkH	THC0290_v2_0909	yfkH	Protein of unknown function YfkH	NA	3387	A601	B183	C44	948	0	0	0	0	-	NA	NA	NA	NA	-	11.3	11.1	10.7	10.6	9.7	9.4	9.2	9.7	8.8	8.3	11	10.8	7.8	7.4	7.8	8.4	7.7	8.4	8.3	8.6	11.1	11.1	10.7	10.7
THC0290_0854	1013172	1013600	1	CDS	NA		THC0290_v2_0910		Protein of unknown function	NA	2551	A265	B94	C27	429	0	0	0	0	-	NA	NA	NA	NA	-	11.3	11.3	11.8	11.9	11.9	11.7	11.2	11.6	11	11	11.9	11.9	11.2	11.3	10.9	10.9	11.3	11.1	11	11.1	11.2	11.2	11.2	11
THC0290_N_0620	1013601	1014074	1	Region	intra				new transcription segment	priA(CDS:THC0290_0855);NA(CDS:THC0290_0854)	3140	A625	B183	C44	474	0	0	0	0	-	0	NA	NA	NA	-	10.8	10.5	11.2	11.1	11.3	10.9	10.7	10.8	9.8	9.3	11.2	11.2	9.1	9.4	10	10.1	8	9.1	9.8	8	10.6	10.8	10.7	10.6
THC0290_0855	1014075	1016525	1	CDS	NA	priA	THC0290_v2_0911	priA	Primosomal protein N'	NA	3277	A611	B183	C44	2451	1	1	0	0	THC0290_N_0621	NA	NA	NA	NA	-	10.8	10.6	10.8	11	10.7	10.6	10.4	9.4	9.5	9.3	11	11	9.2	9.1	10	9.8	9.2	8.9	7.1	7.4	10.5	10.5	10.4	10.3
THC0290_N_0621	1016422	1016591	-1	Region	3prime				new transcription segment	NA(CDS:THC0290_0856)	1781	A1765	B546	C143	170	2	1	1	0	THC0290_0855;THC0290_N_0622	0	NA	NA	NA	-	10.4	10.6	11.5	11.8	12.6	13.1	12.6	13.7	12.8	12.8	11.4	11.8	13.5	13.6	12.8	13	13.1	13.3	12.9	12.4	10.2	10.4	10.1	9.7
THC0290_N_0622	1016526	1016771	1	Region	3prime				new transcription segment	priA(CDS:THC0290_0855)	284	A1837	B563	C145	246	2	1	1	0	THC0290_0856;THC0290_N_0621	0	NA	NA	NA	-	6.7	6	6	6.4	5.9	6.6	5.9	9.8	6	6.8	6.3	5.6	7.7	6.3	4.9	5.7	5.5	7.2	8.2	4.2	6.7	6.8	5	5.7
THC0290_0856	1016592	1017284	-1	CDS	NA		THC0290_v2_0912		Two-component system response regulatory protein, LytTR family	NA	1759	A1762	B546	C143	693	1	1	0	0	THC0290_N_0622	NA	NA	NA	NA	-	10.2	10	11.2	11	11.6	11.9	11.5	12.7	11.9	12	11.2	11.3	13.2	13.6	12.4	12.2	14.3	14.4	13.5	14.4	9.6	10.2	9.7	9.5
THC0290_0857	1017453	1017794	1	CDS	NA	rpsF	THC0290_v2_0913	rpsF	30S ribosomal protein S6	NA	3066	A542	B180	C44	342	0	0	0	0	-	NA	NA	NA	NA	-	14.6	14.6	14	13.9	13.4	13.2	13	13.2	13.8	13.8	14.1	14.1	12.9	13.1	13.2	13.6	12.7	12.7	12.8	12.4	14.6	14.8	14.8	14.8
THC0290_0858	1017800	1018096	1	CDS	NA	rpsR	THC0290_v2_0914	rpsR	30S ribosomal protein S18	NA	3067	A542	B180	C44	297	0	0	0	0	-	NA	NA	NA	NA	-	15	15.2	14.7	14.7	14.2	14.4	14	14.5	14.7	14.9	14.7	14.7	13.9	13.9	14	14.2	13.3	13.6	13.7	13.2	15	15.3	15.2	15.1
THC0290_N_0623	1018097	1018161	1	Region	intra				new transcription segment	rplI(CDS:THC0290_0859);rpsR(CDS:THC0290_0858)	3065	A542	B180	C44	65	0	0	0	0	-	0	NA	NA	NA	-	17.1	16.9	16.7	16.2	15.8	16.2	15.5	17	16	16.5	16.7	16.5	15.9	15.5	15.6	16	14.8	15.3	15.3	14.4	16.7	17.1	17.1	17
THC0290_0859	1018162	1018605	1	CDS	NA	rplI	THC0290_v2_0915	rplI	50S ribosomal protein L9	NA	3061	A542	B180	C44	444	0	0	0	0	-	NA	NA	NA	NA	-	13.7	13.7	13	13.2	12.4	12.3	12.2	14.3	12.9	13.1	13.1	13	12.2	12.1	12.6	12.5	11.8	11.8	12.1	11.2	13.8	13.9	13.9	14
THC0290_N_0624	1018606	1018644	1	Region	3prime				new transcription segment	rplI(CDS:THC0290_0859)	-1	NA	NA	NA	39	0	0	0	0	-	0	NA	NA	NA	-	NA	NA	NA	NA	NA	NA	NA	NA	NA	NA	NA	NA	NA	NA	NA	NA	NA	NA	NA	NA	NA	NA	NA	NA
THC0290_N_0625	1018645	1018746	1	Region	intra				new transcription segment	NA(CDS:THC0290_0860);rplI(CDS:THC0290_0859)	2303	A810	B244	C67	102	0	0	0	0	-	0	NA	NA	NA	-	8.6	8.7	7.7	7.3	6.8	7.1	7.3	7.5	9	9.9	7.7	7.6	7.2	6.7	6.8	7.3	3.9	7.5	8.9	6.7	8.9	8.8	9.2	9.1
THC0290_0860	1018747	1019220	1	CDS	NA		THC0290_v2_0916		Protein of unknown function	NA	3173	A586	B183	C44	474	0	0	0	0	-	NA	NA	NA	NA	-	9.9	10.1	8.9	8.9	7.9	7.7	8.3	9.1	9.8	10.3	8.9	8.8	7.2	7.2	8	8.4	7.2	7.9	6.3	7.9	10.1	10.2	10.5	10.2
THC0290_N_0626	1019221	1019262	1	Region	3prime				new transcription segment	NA(CDS:THC0290_0860)	-1	NA	NA	NA	42	0	0	0	0	-	0	NA	NA	NA	-	NA	NA	NA	NA	NA	NA	NA	NA	NA	NA	NA	NA	NA	NA	NA	NA	NA	NA	NA	NA	NA	NA	NA	NA
THC0290_0861	1019293	1021293	1	CDS	NA	ligA	THC0290_v2_0917	ligA	DNA ligase (NAD+)	NA	2637	A366	B140	C39	2001	0	0	0	0	-	NA	NA	NA	NA	-	10.9	11	11	10.8	11.1	10.8	11	11.7	11.1	10.8	11.2	11.2	10.8	11.1	10.7	10.9	10.5	10.7	10.4	10.8	10.9	11	11	10.7
THC0290_0862	1021380	1022075	1	CDS	NA		THC0290_v2_0918		Probable transmembrane protein of unknown function	NA	760	A1512	B519	C143	696	0	0	0	0	-	NA	NA	NA	NA	-	8.7	8.4	8.5	8.6	9.2	9.2	9.3	11.1	9.6	9.5	8.5	8.6	9.8	10.1	9.4	9.6	9.6	9.8	10	8.8	8.7	8.7	8.2	8.2
THC0290_N_0627	1022076	1022120	1	Region	intra				new transcription segment	NA(CDS:THC0290_0863);NA(CDS:THC0290_0862)	581	A1381	B475	C138	45	0	0	0	0	-	0	NA	NA	NA	-	7.1	7.3	7.1	7.1	7.8	6.9	7.9	9.6	7.8	6.5	7.1	7.5	7	8	6.9	7.8	7.6	7.1	8.6	8.8	7	7.6	6.1	6.2
THC0290_0863	1022121	1022525	1	CDS	NA		THC0290_v2_0919		Conserved protein of unknown function	NA	1696	A1646	B540	C143	405	0	0	0	0	-	NA	NA	NA	NA	-	8.5	8.3	8.1	8.2	9	9.2	9.1	11.3	9.4	8.9	8.3	8.1	9.4	9.9	9.1	9	9.3	9.3	9.8	10.2	8.5	8.7	7.8	7.7
THC0290_0864	1022534	1022812	1	CDS	NA		THC0290_v2_0920		Restriction endonuclease (fragment)	NA	4305	A1006	B320	C87	279	0	0	0	0	-	NA	NA	NA	NA	-	5.7	5.7	4.8	5.2	5.2	4.8	5.1	6.7	4.9	4.4	5.3	5.3	5.4	5.9	4.3	4.2	6	5.2	7.3	7.3	6	6.6	4.7	5.1
THC0290_0865	1022835	1023014	-1	CDS	NA		NA		Hypothetical protein	NA	3002	A569	B183	C44	180	0	0	0	0	-	NA	NA	NA	NA	-	7	7.1	6.3	6.6	5.9	6.4	4.9	7.5	6.3	6.4	6.5	6.4	5.3	4	5	5.7	4.4	6.4	6.7	4.8	7.4	7.4	7.2	7.2
THC0290_N_0628	1023015	1023139	-1	Region	intra				new transcription segment	NA(CDS:THC0290_0865);NA(CDS:THC0290_0866)	11	A1852	B570	C149	125	0	0	0	0	-	0	NA	NA	NA	-	9.8	9.9	9.9	9.9	9.6	9.8	9.9	11.7	11.3	11.6	10	9.8	10.2	9.9	9.5	9.7	9.5	9.8	11.5	8.5	9.6	9.9	9.7	9.5
THC0290_0866	1023140	1024330	-1	CDS	NA		THC0290_v2_0922		Protein of unknown function	NA	3417	A595	B183	C44	1191	0	0	0	0	-	NA	NA	NA	NA	-	12.9	12.9	12.8	12.9	12.6	12.3	12.4	12.9	12.3	11.9	12.7	12.8	11.3	11.6	11.7	11.8	11.5	11.3	11.3	11.8	12.8	12.8	12.8	12.5
THC0290_N_0629	1024365	1024417	-1	Region	intra				new transcription segment	NA(CDS:THC0290_0866);recN(CDS:THC0290_0867)	2952	A451	B168	C44	53	0	0	0	0	-	0	NA	NA	NA	-	10.3	10.2	10.3	9.9	9.6	9.5	9.9	10.1	10.1	10.4	10.3	10.2	8.9	9.1	9.8	10.1	5.5	8.7	9.5	4.5	10.2	10.3	9.7	9.5
THC0290_0867	1024418	1026070	-1	CDS	NA	recN	THC0290_v2_0923	recN	DNA repair protein recN	NA	3077	A645	B183	C44	1653	0	0	0	0	-	NA	NA	NA	NA	-	11.7	11.8	11.5	11.5	11.2	11.1	11.3	11.8	10.8	10.8	11.7	11.6	10.2	10.2	10.8	11	10.2	10.3	10	10	11.7	11.7	11.1	10.9
THC0290_0868	1026080	1026967	-1	CDS	NA		THC0290_v2_0924		Protein of unknown function precursor	NA	3078	A645	B183	C44	888	0	0	0	0	-	NA	NA	NA	NA	-	11.8	11.6	11.4	11.5	11.1	11.3	11.2	12	10.6	10.9	11.5	11.4	11	10.8	11	11.1	10.4	10.5	10.5	10.1	11.7	11.7	11.3	11.2
THC0290_0869	1026960	1028168	-1	CDS	NA	coaBC	THC0290_v2_0925	coaBC	Bifunctional protein CoaBC : Phosphopantothenoylcysteine decarboxylase and Phosphopantothenate--cysteine ligase	NA	3076	A645	B183	C44	1209	0	0	0	0	-	NA	NA	NA	NA	-	11.8	11.9	11.5	11.5	11.2	11.4	11.7	11.8	11.1	11.2	11.4	11.3	10.8	10.6	11.2	11.1	10.7	10.5	10.4	10.4	11.9	11.8	11.7	11.6
THC0290_0870	1028176	1028490	-1	CDS	NA		THC0290_v2_0926		Protein of unknown function	NA	2324	A641	B183	C44	315	0	0	0	0	-	NA	NA	NA	NA	-	13.4	13.5	13.4	13.2	13	13	13.4	13.7	12.9	13.2	13.2	13.3	13.3	12.9	13.6	13.6	12.7	12.6	12.4	11.6	13.6	13.7	13.8	13.9
THC0290_0871	1028500	1029294	-1	CDS	NA	bamD	THC0290_v2_0927	bamD	Outer membrane assembly lipoprotein precursor BamD	NA	2325	A641	B183	C44	795	0	0	0	0	-	NA	NA	NA	NA	-	12.8	12.8	12.8	12.7	12.5	12.2	12.2	12.9	11.1	11.8	12.6	12.8	12.6	12.7	12.7	12.6	11.8	11.7	11.5	10.8	12.9	13	13.3	13.2
[truncated: 2,670 more rows]
[truncated: 40 more columns]

## Sheet: putative artefacts
Locustag	Start	End	Strand	T1_a	T1_c	T2_a	T2_c	T3_a	T3_c	T4_a	T4_c	T5_a	T5_c	T2-FCS_a	T2-FCS_b	TYESA-FCS_a	TYESA-FCS_b	TYESA_a	TYESA_b	TYESA-0.5_a	TYESA-0.5_b	TYESA-0.2_a	TYESA-0.2_b	CS3_a	CS3_c	Temp10C_a	Temp10C_c	Temp4C_a	Temp4C_c	DIP_a	DIP_c	NaCl_a	NaCl_c	CS1_a	CS1_b	HP_a	HP_b	LYSO_a	LYSO_b	CS2_a	CS2_b	AMOX_a	AMOX_b	Anaer_a	Anaer_b	LAB_a	LAB_c	Water_a	Water_c
[truncated: 608 more rows]
[truncated: 18 more columns]
