# Supplementary material for: Transcriptome architecture and regulation at environmental transitions in flavobacteria: the case of an important fish pathogen
Source: ISME Commun. 2021 Jul 7;1:33. doi: 10.1038/s43705-021-00029-9 (PMC9723704; doi:10.1038/s43705-021-00029-9)
Supplement: Supplementary file 5 — Table S4 [file 43705_2021_29_MOESM5_ESM.xlsx]

## Sheet: Legend
Table S4: Lists of genes weakly or highly expressed in all biological conditions analyzed by microarrays.
Sheet	Description
weakly expressed	List of CDS of F. psychrophilum OSU THCO2-90 belonging to the 25% less expressed genes in all biological conditions analyzed by microarrays (rank.max < 0.25).
highly expressed	List of CDS of F. psychrophilum OSU THCO2-90 belonging to the 25% most highly expressed genes in all biological conditions analyzed by microarrays (rank.min > 0.75).
Column	Description
Locustag	Locustag retrieved from the F. psychrophilum THCO2-90 genome, ENA accession number LT670843.1 ot unique identifier (THC0290_N_...) for new TRs annotated in this study.
Start	Coordinates according to the F. psychrophilum THCO2-90 genome sequence LT670843.1.
End	Coordinates according to the F. psychrophilum THCO2-90 genome sequence LT670843.1.
Strand	(+) for positive, (-) for negative strand.
Name	Gene name according to the F. psychrophilum THCO2-90 genome sequence LT670843.1.
Locustag_v2	Locustag retrieved from the F. psychrophilum THCO2-90 genome annotation of the MicroScope annotation platform (unpublished data).
Name_v2	Gene name according to the F. psychrophilum THCO2-90 genome annotation of the MicroScope annotaiton platform (unpublished data).
Annotation	Description of the protein product.
rank.min	Minimum rank for this CDS across the 64 samples. CDSs have been ranked by increasing level of expression measured in each of the 64 samples, ranks have been divided by 2344 (the number of CDSs considered), from 1/2344 for the lowest expression value to 2344/2344 for the highest expression value. This column reports the minimum of this rank for a given CDS across the 64 samples.
rank.max	Maximum rank for this CDS across the 64 samples.

## Sheet: weakly expressed
Locustag	Start	End	Strand	Name	Locustag_v2	Name_v2	Annotation	rank.min	rank.max
THC0290_1141	1333189	1334019	1		THC0290_v2_1206		Protein of unknown function	0.000426621	0.0217577
THC0290_1166	1357451	1358482	1		THC0290_v2_1232		Probable glycosidase, PH1107-related protein	0.00170648	0.0375427
THC0290_1129	1317815	1320829	1		THC0290_v2_1194		SusC/RagA family TonB-dependent receptor precursor	0.000853242	0.040529
THC0290_1158	1349866	1350774	1		THC0290_v2_1223		Probable ribonuclease BN	0.00170648	0.0494881
THC0290_0948	1121584	1121709	1		NA		Hypothetical protein	0.000426621	0.0499147
THC0290_1181	1367986	1369611	1		THC0290_v2_1249		Protein of unknown function containing peptidoglycan binding domain	0.000853242	0.0511945
THC0290_1130	1320848	1322251	1		THC0290_v2_1195		SusD/RagB family lipoprotein precursor	0.00127986	0.0558874
THC0290_1155	1345011	1346267	1		THC0290_v2_1220		Probable NADH dehydrogenase	0.00127986	0.0575939
THC0290_0286	340851	343562	1		THC0290_v2_0294		Protein of unknown function precursor	0.00298635	0.059727
THC0290_0950	1122619	1123467	-1		THC0290_v2_1010		Probable transcriptional regulator, AraC family	0.000853242	0.0759386
THC0290_2149	2477364	2477828	1		THC0290_v2_2252		Protein of unknown function	0.000426621	0.0763652
THC0290_1167	1358484	1360820	1		THC0290_v2_1233		Glycosyl transferase, group 1 family protein	0.0115188	0.0780717
THC0290_1153	1343923	1344357	1		THC0290_v2_1218		Probable two-component system response regulatory protein	0.00213311	0.0802048
THC0290_1210	1392040	1392219	1		THC0290_v2_1279		Hypothetical protein	0.000426621	0.0853242
THC0290_1300	1498732	1499442	1		THC0290_v2_1384		Probable transmembrane protein of unknown function	0.00469283	0.0870307
THC0290_1143	1334709	1335704	1		THC0290_v2_1208		Protein of unknown function	0.00255973	0.0874573
THC0290_1145	1336409	1337056	1		THC0290_v2_1210		Protein of unknown function	0.000853242	0.0887372
THC0290_1518	1761915	1762550	1		THC0290_v2_1606		Probable transmembrane protein of unknown function	0.000426621	0.0891638
THC0290_1189	1374731	1375690	1		THC0290_v2_1257		Probable transmembrane protein of unknown function	0.0166382	0.102816
THC0290_0522	637937	638200	-1		THC0290_v2_0546		Hypothetical protein	0.000426621	0.108788
THC0290_0282	337611	338546	1		THC0290_v2_0290		Probable outer membrane protein precursor	0.00426621	0.111775
THC0290_1151	1339398	1339592	1		THC0290_v2_1216		Hypothetical protein	0.000426621	0.111775
THC0290_1180	1367403	1367840	1		THC0290_v2_1248		Hypothetical protein	0.000426621	0.113481
THC0290_1182	1369637	1370473	1		THC0290_v2_1250		Probable universal stress protein, UspA family	0.00170648	0.114334
THC0290_1144	1335777	1336403	1		THC0290_v2_1209		Protein of unknown function	0.00170648	0.115188
THC0290_1777	2060543	2061067	-1	gpmA	THC0290_v2_1875	gpmA	Phosphoglycerate mutase	0.0119454	0.119454
THC0290_1191	1377671	1379683	1		THC0290_v2_1259		Probable outer membrane protein precursor	0.00170648	0.120307
THC0290_0865	1022835	1023014	-1		NA		Hypothetical protein	0.00127986	0.121587
THC0290_1157	1348785	1349876	1		THC0290_v2_1222		Putative transporting permease	0.00127986	0.12372
THC0290_0849	1009303	1009518	-1		NA		Hypothetical transmembrane protein	0.00170648	0.12628
THC0290_0864	1022534	1022812	1		THC0290_v2_0920		Restriction endonuclease (fragment)	0.00213311	0.130546
THC0290_0755	900063	900389	-1		THC0290_v2_0809		Protein of unknown function	0.00938567	0.131399
THC0290_0393	478553	479161	-1		THC0290_v2_0407		Probable transmembrane protein of unknown function	0.0127986	0.133959
THC0290_1778	2061052	2061828	-1	cobS	THC0290_v2_1876	cobS	Adenosylcobinamide-GDP ribazoletransferase	0.0119454	0.133959
THC0290_2131	2453544	2455007	-1		THC0290_v2_2233		Probable transmembrane protein of unknown function	0.00853242	0.134386
THC0290_1455	1687990	1688883	1		THC0290_v2_1543		Probable transcriptional regulator, LysR family	0.0187713	0.134812
THC0290_2116	2438810	2439340	1		THC0290_v2_2218		Protein of unknown function	0.0183447	0.140358
THC0290_0625	760753	761388	-1		THC0290_v2_0671		Putative ABC-type transport system, ATPase component	0.0209044	0.141638
THC0290_1642	1903681	1905486	-1		THC0290_v2_1735		Probable cytochrome c peroxidase precursor	0.0119454	0.141638
THC0290_1188	1373983	1374717	1		THC0290_v2_1256		Probable ABC-type transport system, ATPase component	0.0264505	0.142491
THC0290_1136	1327699	1329192	-1		THC0290_v2_1201		Probable transmembrane protein of unknown function	0.00170648	0.146758
THC0290_2190	2532896	2535271	1	pbpC	THC0290_v2_2296	pbpC	Membrane carboxypeptidase/penicillin-binding protein PbpC	0.00469283	0.149744
THC0290_0267	324293	325300	1		THC0290_v2_0277		Hypothetical protein precursor	0.00767918	0.159556
THC0290_0216	264266	265192	1		THC0290_v2_0225		Probable transmembrane protein of unknown function	0.00725256	0.162543
THC0290_0444	537060	539312	1		THC0290_v2_0461		Probable outer membrane protein precursor	0.00255973	0.165529
THC0290_0590	718261	719187	1		THC0290_v2_0632		Putative 4Fe-4S binding protein	0.0081058	0.165956
THC0290_1781	2064233	2064637	-1		NA		Protein of unknown function	0.00639932	0.168089
THC0290_0565	687769	689262	-1		THC0290_v2_0603		Protein of unknown function, putative reverse transcriptase (RNA-dependent DNA polymerase)	0.0311433	0.168515
THC0290_1203	1386310	1386462	1		THC0290_v2_1272		Conserved exported protein of unknown function	0.000853242	0.172355
THC0290_1162	1352798	1353967	-1		THC0290_v2_1228		Probable phospholipase D/Transphosphatidylase	0.00682594	0.174488
THC0290_0626	761381	762274	-1		THC0290_v2_0672		Putative ABC-type transport system, permease component	0.00511945	0.175768
THC0290_2377	2748714	2749862	-1		THC0290_v2_2493		Probable transmembrane protein of unknown function	0.00682594	0.177048
THC0290_0378	461753	462799	-1		THC0290_v2_0392		Probable glycosyl transferase	0.0285836	0.177474
THC0290_1495	1732704	1735469	1		THC0290_v2_1583		Protein of unknown function	0.0238908	0.180461
THC0290_0697	832717	835182	1		THC0290_v2_0745		Putative outer membrane protein precursor	0.0362628	0.183447
THC0290_1254	1448226	1451315	1		THC0290_v2_1334		Probable transmembrane protein	0.0217577	0.186007
THC0290_1366	1578504	1578698	1		NA		Hypothetical protein	0.0179181	0.18686
THC0290_1187	1373220	1373978	1		THC0290_v2_1255		Probable ABC-type transport system, permease component	0.0277304	0.1907
THC0290_1178	1366237	1366521	1		THC0290_v2_1246		Hypothetical protein	0.000426621	0.191126
THC0290_1150	1338848	1339387	1		THC0290_v2_1215		Probable transcriptional regulator, AraC family	0.00383959	0.196246
THC0290_1744	2031995	2033749	1		THC0290_v2_1841		Probable ABC-type transport system, ATPase and permease components	0.0341297	0.197526
THC0290_1271	1469304	1469903	-1	hisIE	THC0290_v2_1354	hisIE	Histidine biosynthesis bifunctional protein HisIE [Includes: Phosphoribosyl-AMP cyclohydrolase, Phosphoribosyl-ATP pyrophosphatase]	0.00554608	0.199232
THC0290_0454	550915	551790	-1	ilvE	THC0290_v2_0471	ilvE	Branched-chain-amino-acid transaminase	0.00127986	0.200085
THC0290_1161	1351742	1352752	1		THC0290_v2_1227		Probable transmembrane protein of unknown function	0.0196246	0.202218
THC0290_1179	1366528	1367154	-1	gpmA	THC0290_v2_1247	gpmA	Phosphoglycerate mutase	0.00213311	0.202645
THC0290_1194	1381701	1381925	1		THC0290_v2_1263		Hypothetical protein	0.000426621	0.204352
THC0290_1255	1451315	1452553	1		THC0290_v2_1335		Protein of unknown function precursor	0.0196246	0.204778
THC0290_0846	1006906	1007832	-1		THC0290_v2_0903		Glycosyl transferase, group 2 family protein	0.0546075	0.212457
THC0290_0395	481952	482293	-1		NA		Hypothetical protein	0.000853242	0.213311
THC0290_1209	1391588	1392010	1		THC0290_v2_1278		Protein of unknown function	0.000426621	0.213737
THC0290_0495	601377	601946	-1		THC0290_v2_0518		Hypothetical protein	0.00511945	0.215017
THC0290_1206	1387098	1387430	1		THC0290_v2_1275		Hypothetical protein	0.00170648	0.215017
THC0290_1154	1344496	1344912	1		THC0290_v2_1219		Probable lipoprotein precursor	0.028157	0.216724
THC0290_0546	664709	665848	-1		THC0290_v2_0580		Restriction endonuclease	0.00383959	0.218003
THC0290_1152	1339611	1343918	1		THC0290_v2_1217		Probable hybrid two-component system sensor histidine kinase and response regulator receiver	0.0268771	0.219283
THC0290_2229	2581899	2583164	-1		THC0290_v2_2336		Probable ABC-type transport system, permease component	0.0127986	0.219283
THC0290_2004	2330607	2331686	-1		THC0290_v2_2107		Glycosyl transferase, group 1 family protein	0.0255973	0.22099
THC0290_2361	2731266	2732366	-1	smf	THC0290_v2_2475	smf	Protein Smf of unknown function	0.0341297	0.223123
THC0290_1303	1502141	1504564	-1		THC0290_v2_1387		Probable TonB-dependent outer membrane receptor precursor	0.00938567	0.223976
THC0290_1156	1346277	1348781	1		THC0290_v2_1221		Cation-transporting ATPase, P-type	0.000426621	0.224403
THC0290_0521	637705	637932	-1		THC0290_v2_0545		Protein of unknown function	0.000853242	0.224829
THC0290_1190	1375959	1377608	1		THC0290_v2_1258		Hypothetical protein	0.00298635	0.227389
THC0290_1198	1383646	1384062	1		THC0290_v2_1267		Probable transmembrane protein of unknown function	0.000853242	0.229522
THC0290_0406	496704	497933	-1	kdtA	THC0290_v2_0421	waaA	3-deoxy-D-manno-octulosonic-acid transferase	0.0243174	0.230375
THC0290_0720	856373	856993	-1		THC0290_v2_0769		Pseudouridylate synthase	0.0226109	0.230375
THC0290_0545	663927	664523	-1		THC0290_v2_0579		Hypothetical protein	0.00469283	0.230802
THC0290_1725	2011497	2012180	1		THC0290_v2_1821		Two-component system response regulatory protein	0.0106655	0.233362
THC0290_2213	2566912	2570595	-1		THC0290_v2_2320		Probable bifunctional protein : exporter and 1-acyl-sn-glycerol-3-phosphate acyltransferase precursor	0.0132253	0.233788
THC0290_1100	1285018	1285905	-1	yojE	THC0290_v2_1165	yojE	Probable permease YojE	0.00383959	0.235495
THC0290_1779	2061863	2063539	-1	bluB/cobT	THC0290_v2_1877	bluB/cobT	Bifunctional protein : cob(II)yrinic acid a,c-diamide reductase and nicotinate-nucleotide--dimethylbenzimidazole phosphoribosyltransferase	0.0294369	0.236775
THC0290_0159	197573	198358	1		THC0290_v2_0162		Probable hydrolase	0.0337031	0.238481
THC0290_0564	686640	687575	-1		THC0290_v2_0602		Hypothetical protein	0.00383959	0.239334
THC0290_1170	1362551	1363024	1		THC0290_v2_1238		DPS (DNA Protecting protein under Starved conditions) domain family protein	0.000853242	0.241041
THC0290_0396	482475	482840	-1		THC0290_v2_0410		Protein of unknown function	0.0153584	0.245307
THC0290_2211	2563718	2565388	-1		THC0290_v2_2318		Protein of unknown function	0.00255973	0.24616
THC0290_2021	2348054	2349070	-1		THC0290_v2_2124		Probable transmembrane protein of unknown function	0.0110922	0.246587
THC0290_0761	907194	908144	-1		THC0290_v2_0816		Protein of unknown function	0.0132253	0.247014
THC0290_1457	1690190	1691323	-1		THC0290_v2_1545		Probable acyltransferase	0.0524744	0.247014
THC0290_0279	336416	337207	-1		THC0290_v2_0289		Hypothetical protein precursor	0.0311433	0.24744
THC0290_0712	848495	849574	1	recF	THC0290_v2_0761	recF	DNA replication and repair protein RecF	0.0793515	0.249573
THC0290_1121	1307925	1309172	1		THC0290_v2_1186		Probable transposase	0.0153584	0.249573
THC0290_1273	1470665	1471390	-1	hisA	THC0290_v2_1356	hisA	1-(5-phosphoribosyl)-5-((5-phosphoribosylamino)methylideneamino)imidazole-4-carboxamide isomerase	0.00383959	0.249573
THC0290_1645	1908278	1909090	1		THC0290_v2_1738		Protein of unknown function	0.0465017	0.249573

## Sheet: highly expressed
Locustag	Start	End	Strand	Name	Locustag_v2	Name_v2	Annotation	rank.min	rank.max
THC0290_1932	2246596	2252601	-1		THC0290_v2_2033		Protein of unknown function precursor containing a C-terminal secretion signal. Putative adhesin.	0.989334	1
THC0290_0743	882683	883687	1	gldN	THC0290_v2_0795	gldN	Gliding motility protein precursor GldN	0.959898	0.997867
THC0290_2083	2408063	2408377	-1	rplX	THC0290_v2_2184	rplX	50S ribosomal protein L24	0.959898	0.999573
THC0290_0916	1076946	1078736	1	rpsA	THC0290_v2_0976	rpsA	30S ribosomal protein S1	0.953498	0.990188
THC0290_0741	880406	881056	1	gldL	THC0290_v2_0793	gldL	Gliding motility transmembrane protein GldL	0.949659	0.994881
THC0290_1944	2267298	2268485	-1	tuf	THC0290_v2_2046	tuf	Elongation factor Tu (EF-Tu)	0.945819	0.999147
THC0290_1955	2279501	2281108	-1		THC0290_v2_2057		SusD/RagB family lipoprotein precursor	0.945819	0.999573
THC0290_2082	2407509	2408060	-1	rplE	THC0290_v2_2183	rplE	50S ribosomal protein L5	0.94198	0.999147
THC0290_0161	201192	202589	-1		THC0290_v2_0164		Outer membrane protein precursor, OmpA family P60	0.938993	0.999147
THC0290_1395	1609710	1609907	1	rpmI	THC0290_v2_1479	rpmI	50S ribosomal protein L35	0.937713	0.994027
THC0290_1753	2040786	2040938	-1		THC0290_v2_1851		Hypothetical protein	0.937713	1
THC0290_2081	2407236	2407505	-1	rpsN	THC0290_v2_2182	rpsN	30S ribosomal protein S14	0.936433	0.991468
THC0290_2079	2406138	2406683	-1	rplF	THC0290_v2_2180	rplF	50S ribosomal protein L6	0.932167	0.99616
THC0290_2147	2473488	2475218	1	gldJ	THC0290_v2_2250	gldJ	Gliding motility lipoprotein precursor GldJ	0.930461	0.991894
THC0290_1865	2164658	2165821	-1		THC0290_v2_1965		Transposase IS4 family	0.928754	0.99744
THC0290_2085	2408761	2409021	-1	rpsQ	THC0290_v2_2186	rpsQ	30S ribosomal protein S17	0.928328	0.999147
THC0290_1396	1610082	1610426	1	rplT	THC0290_v2_1480	rplT	50S ribosomal protein L20	0.927901	0.992747
THC0290_0892	1051044	1052207	-1		THC0290_v2_0951		Transposase IS4 family	0.927474	0.997014
THC0290_2088	2409688	2410449	-1	rpsC	THC0290_v2_2189	rpsC	30S ribosomal protein S3	0.926195	0.999147
THC0290_2087	2409242	2409667	-1	rplP	THC0290_v2_2188	rplP	50S ribosomal protein L16	0.925768	0.997014
THC0290_0742	881104	882633	1	gldM	THC0290_v2_0794	gldM	Gliding motility transmembrane protein GldM	0.925341	0.994027
THC0290_1104	1291219	1291386	1		NA		Hypothetical protein	0.924488	0.993174
THC0290_1310	1511467	1512630	-1		THC0290_v2_1394		Transposase IS4 family	0.923635	0.996587
THC0290_2072	2402893	2403009	-1	rpmJ	NA		50S ribosomal protein L36	0.923635	0.999147
THC0290_0284	338926	340089	1		THC0290_v2_0292		Transposase IS4 family	0.922782	0.997014
THC0290_2080	2406700	2407098	-1	rpsH	THC0290_v2_2181	rpsH	30S ribosomal protein S8	0.919369	0.991468
THC0290_2098	2416627	2417010	-1	rpsL	THC0290_v2_2199	rpsL	30S ribosomal protein S12	0.918942	0.991894
THC0290_1066	1243591	1244754	1		THC0290_v2_1129		Transposase IS4 family	0.918515	0.99744
THC0290_2071	2402516	2402890	-1	rpsM	THC0290_v2_2173	rpsM	30S ribosomal protein S13	0.913823	0.998294
THC0290_2092	2411990	2412280	-1	rplW	THC0290_v2_2193	rplW	50S ribosomal protein L23	0.90785	0.999147
THC0290_0021	25399	25836	1	remF	THC0290_v2_0022	remF	Gliding motility protein RemF precursor	0.90401	0.998294
THC0290_0460	556704	557159	-1	rplM	THC0290_v2_0477	rplM	50S ribosomal protein L13	0.901877	0.985495
THC0290_2076	2405050	2405232	-1	rpmD	THC0290_v2_2177	rpmD	50S ribosomal protein L30	0.898464	0.999147
THC0290_0459	556318	556704	-1	rpsI	THC0290_v2_0476	rpsI	30S ribosomal protein S9	0.898038	0.991041
THC0290_2097	2416124	2416600	-1	rpsG	THC0290_v2_2198	rpsG	30S ribosomal protein S7	0.897611	0.988481
THC0290_0022	25871	27163	1	remG	THC0290_v2_0023	remG	Gliding motility protein RemG precursor	0.897184	1
THC0290_2078	2405776	2406126	-1	rplR	THC0290_v2_2179	rplR	50S ribosomal protein L18	0.896758	0.99744
THC0290_2077	2405245	2405769	-1	rpsE	THC0290_v2_2178	rpsE	30S ribosomal protein S5	0.896331	0.997014
THC0290_1941	2265883	2266326	-1	rplK	THC0290_v2_2043	rplK	50S ribosomal protein L11	0.895904	0.983788
THC0290_2075	2404585	2405037	-1	rplO	THC0290_v2_2176	rplO	50S ribosomal protein L15	0.894625	0.994454
THC0290_1940	2265191	2265880	-1	rplA	THC0290_v2_2042	rplA	50S ribosomal protein L1	0.893771	0.993174
THC0290_2091	2411156	2411980	-1	rplB	THC0290_v2_2192	rplB	50S ribosomal protein L2	0.892918	0.996587
THC0290_0356	439864	440406	1	rpsP	THC0290_v2_0368	rpsP	30S ribosomal protein S16	0.891638	0.992321
THC0290_1956	2281114	2284296	-1		THC0290_v2_2058		SusC/RagA family TonB-dependent receptor precursor, Omp121 family	0.890358	0.999573
THC0290_2084	2408390	2408758	-1	rplN	THC0290_v2_2185	rplN	50S ribosomal protein L14	0.889932	0.987628
THC0290_2094	2412916	2413533	-1	rplC	THC0290_v2_2195	rplC	50S ribosomal protein L3	0.885239	0.991894
THC0290_1938	2264264	2264632	-1	rplL	THC0290_v2_2040	rplL	50S ribosomal protein L7/L12	0.882253	0.993174
THC0290_2277	2635038	2635415	1		THC0290_v2_2389		Protein of unknown function	0.880546	0.972696
THC0290_0177	223028	224638	-1		THC0290_v2_0183		Probable cell surface protein (Leucine-rich repeat protein) precursor	0.87884	0.998294
THC0290_1947	2270388	2270585	-1	rpsU	THC0290_v2_2049	rpsU	30S ribosomal protein S21	0.87884	0.998294
THC0290_2064	2395306	2396589	-1	gltA	THC0290_v2_2166	gltA	Citrate (Si)-synthase	0.876706	0.979949
THC0290_0926	1087175	1087702	1	ftnA	THC0290_v2_0986	ftnA	Ferritin	0.87628	0.995734
THC0290_0153	189616	190227	-1	rplY	THC0290_v2_0156	rplY	50S ribosomal protein L25	0.875853	0.975256
THC0290_2350	2718538	2719650	-1		THC0290_v2_2463		Probable lipoprotein precursor	0.871587	0.990614
THC0290_0706	844064	844339	1	hupB	THC0290_v2_0754	hupB	Histone-like bacterial DNA-binding protein HU-beta	0.87116	0.994454
THC0290_2164	2499959	2500573	-1	exbD1	THC0290_v2_2270	exbD1	Biopolymer transport ExbD1 protein	0.87116	0.991468
THC0290_0740	878961	880355	1	gldK	THC0290_v2_0792	gldK	Gliding motility lipoprotein precursor GldK	0.869881	0.971843
THC0290_1227	1420810	1422006	-1	sucC	THC0290_v2_1306	sucC	Succinyl-CoA synthetase, beta subunit	0.869881	0.96715
THC0290_2090	2410871	2411149	-1	rpsS	THC0290_v2_2191	rpsS	30S ribosomal protein S19	0.869881	0.99744
THC0290_0858	1017800	1018096	1	rpsR	THC0290_v2_0914	rpsR	30S ribosomal protein S18	0.866468	0.991894
THC0290_2089	2410451	2410864	-1	rplV	THC0290_v2_2190	rplV	50S ribosomal protein L22	0.865614	0.991041
THC0290_2070	2402124	2402507	-1	rpsK	THC0290_v2_2172	rpsK	30S ribosomal protein S11	0.863908	0.997014
THC0290_0669	807346	807612	-1	rpsO	THC0290_v2_0716	rpsO	30S ribosomal protein S15	0.863055	0.990614
THC0290_2093	2412287	2412916	-1	rplD	THC0290_v2_2194	rplD	50S ribosomal protein L4	0.860922	0.997014
THC0290_1925	2235143	2237407	-1	acnA	THC0290_v2_2026	acnA	Aconitate hydratase	0.859642	0.976962
THC0290_0290	348775	350118	-1	gdhA	THC0290_v2_0298	gdhA	Glutamate dehydrogenase (NADP+)	0.858362	0.978669
THC0290_2074	2403230	2404573	-1	secY	THC0290_v2_2175	secY	Preprotein translocase SecY subunit	0.857509	0.996587
THC0290_1754	2040948	2041130	-1	rpmG	THC0290_v2_1852	rpmG	50S ribosomal protein L33	0.856229	0.976536
THC0290_1628	1888799	1889020	1		THC0290_v2_1721		Protein of unknown function	0.855375	0.990188
THC0290_0471	567685	568509	-1	uspA	THC0290_v2_0490	uspA	Universal stress protein UspA	0.854522	0.994027
THC0290_0835	994041	994391	1	rplS	THC0290_v2_0890	rplS	50S ribosomal protein L19	0.854096	0.979522
THC0290_1103	1289526	1290923	-1	fumC	THC0290_v2_1168	fumC	Fumarate hydratase class II	0.850256	0.972696
THC0290_1895	2202279	2202530	-1	rpmE	THC0290_v2_1996	rpmE	50S ribosomal protein L31	0.849829	0.975683
THC0290_1534	1788482	1789756	-1	glyA	THC0290_v2_1622	glyA	Glycine hydroxymethyltransferase	0.848549	0.980802
THC0290_0179	225904	227169	-1		THC0290_v2_0185		Probable cell surface protein (Leucine-rich repeat protein) precursor	0.84727	0.999573
THC0290_0295	355170	355370	1		THC0290_v2_0304		Probable cold shock protein	0.843003	0.999573
THC0290_2073	2403013	2403228	-1	infA	THC0290_v2_2174	infA	Translation initiation factor IF-1	0.84215	0.989761
THC0290_0180	227183	228379	-1		THC0290_v2_0186		Probable cell surface protein (Leucine-rich repeat protein) precursor	0.841297	0.999573
THC0290_2165	2500639	2501457	-1	exbB	THC0290_v2_2271	exbB	Biopolymer transport ExbB protein	0.837884	0.981229
THC0290_1930	2243685	2245619	-1		THC0290_v2_2031		Probable outer membrane protein precursor, OmpA family	0.837031	0.968003
THC0290_0334	409678	411612	1		THC0290_v2_0346		Probable outer membrane protein precursor, OmpA family	0.834471	0.96587
THC0290_0836	994825	996051	1	icd	THC0290_v2_0893	icd	Isocitrate dehydrogenase (NADP+)	0.834471	0.985495
THC0290_0417	507058	508683	-1	pruA	THC0290_v2_0432	pruA	1-pyrroline-5-carboxylate dehydrogenase	0.834044	0.981229
THC0290_0170	213837	215033	-1		THC0290_v2_0174		Probable cell surface protein (Leucine-rich repeat protein) precursor	0.831058	0.99872
THC0290_2349	2718086	2718493	-1		THC0290_v2_2462		Probable lipoprotein precursor	0.830631	0.985922
THC0290_2319	2674511	2675959	-1	sufB	THC0290_v2_2431	sufB	Fe-S assembly protein, SufB	0.827218	0.972696
THC0290_0332	400740	408701	1		THC0290_v2_0344		Protein of unknown function precursor, putative adhesin	0.825512	1
THC0290_2406	2779028	2779204	1		THC0290_v2_2525		Putative Sec-independent protein translocase (twin-arginine translocation protein)	0.821672	0.99744
THC0290_0630	765265	765966	1	clpP	THC0290_v2_0676	clpP	S14 family, ATP-dependent Clp protease proteolytic subunit	0.819966	0.951792
THC0290_1931	2245630	2246544	-1		THC0290_v2_2032		Protein of unknown function precursor	0.818259	0.96587
THC0290_0245	300280	301329	-1	queA	THC0290_v2_0255	queA	S-adenosylmethionine:tRNA-ribosyltransferase- isomerase	0.817833	0.99872
THC0290_0663	800773	801222	1		THC0290_v2_0709		Protein of unknown function	0.817406	0.968003
THC0290_2086	2409039	2409230	-1	rpmC	THC0290_v2_2187	rpmC	50S ribosomal protein L29	0.812713	0.991468
THC0290_0333	408753	409667	1		THC0290_v2_0345		Protein of unknown function precursor	0.81186	0.967577
THC0290_2383	2754975	2755172	-1	atpE	THC0290_v2_2500	atpE	ATP synthase C subunit	0.809727	0.979096
THC0290_1939	2264685	2265185	-1	rplJ	THC0290_v2_2041	rplJ	50S ribosomal protein L10	0.808447	0.987201
THC0290_1632	1894800	1895606	-1		THC0290_v2_1725		Probable lipoprotein precursor	0.805887	0.999573
THC0290_1945	2269088	2269390	-1		THC0290_v2_2047		Protein of unknown function	0.805034	0.99872
THC0290_2162	2498547	2499365	-1	tonB	THC0290_v2_2268	tonB	Protein TonB	0.804608	0.986775
THC0290_0122	155419	156930	1	atpD	THC0290_v2_0122	atpD	ATP synthase beta subunit	0.802901	0.975256
THC0290_1687	1958866	1959432	1	yceI	THC0290_v2_1780	yceI	Protein of unknown function YceI precursor	0.802048	0.999573
THC0290_2334	2694258	2695469	1	sucB	THC0290_v2_2446	sucB	Dihydrolipoyllysine-residue succinyltransferase component of 2-oxoglutarate dehydrogenase complex	0.801621	0.976109
THC0290_0007	7614	7964	1		THC0290_v2_0007		Probable transmembrane protein of unknown function	0.801195	0.99616
THC0290_1755	2041157	2041393	-1	rpmB	THC0290_v2_1853	rpmB	50S ribosomal protein L28	0.796928	0.966297
THC0290_0097	125923	126588	1	sdhC	THC0290_v2_0097	sdhC	Succinate dehydrogenase, cytochrome b subunit	0.793089	0.947099
THC0290_0100	129134	129898	1	sdhB	THC0290_v2_0100	sdhB	Succinate dehydrogenase, iron-sulfur protein	0.793089	0.969283
THC0290_2096	2413957	2416113	-1	fusA	THC0290_v2_2197	fusA	Elongation factor G (EF-G)	0.789249	0.995734
THC0290_0098	126598	128607	1	sdhA	THC0290_v2_0098	sdhA	Succinate dehydrogenase, flavoprotein subunit	0.788823	0.970563
THC0290_1479	1717544	1718788	-1	rocD	THC0290_v2_1567	rocD	Ornithine--oxo-acid transaminase	0.783703	0.96459
THC0290_0008	7968	8222	1		THC0290_v2_0008		Protein of unknown function	0.783276	0.995734
THC0290_0060	81475	81885	-1	yqiW	THC0290_v2_0061	yqiW	Protein of unknown function YqiW	0.783276	0.995307
THC0290_0359	441970	443148	-1	gcdH	THC0290_v2_0371	gcdH	Glutaryl-CoA dehydrogenase	0.78157	0.938993
THC0290_2163	2499397	2499939	-1	exbD2	THC0290_v2_2269	exbD2	Biopolymer transport ExbD2 protein	0.781143	0.987628
THC0290_1417	1639246	1640313	-1		THC0290_v2_1501		Cysteine synthase/cystathionine beta-synthase family protein	0.78029	0.90529
THC0290_2128	2449049	2451892	1	gcvP	THC0290_v2_2230	gcvP	Glycine dehydrogenase (decarboxylating)	0.778157	0.971416
THC0290_0730	867321	867695	-1	secG	THC0290_v2_0781	secG	Preprotein translocase SecG subunit	0.77773	0.927474
THC0290_0312	381240	382067	1	yggG	THC0290_v2_0322	yggG	Putative secreted M48 family metalloprotease YggG precursor	0.776877	0.986775
THC0290_2252	2603650	2605203	1	pcd	THC0290_v2_2360	pcd	Piperideine-6-carboxylate dehydrogenase	0.775597	0.912543
THC0290_0366	447661	448809	1		THC0290_v2_0379		Cys/Met metabolism PLP-dependent enzyme	0.773038	0.974403
THC0290_1535	1789893	1791176	1	fahA	THC0290_v2_1623	fahA	Fumarylacetoacetase	0.772611	0.937713
THC0290_1069	1246763	1247797	-1	gmd	THC0290_v2_1132	gmd	GDP-mannose 4,6-dehydratase	0.770904	0.900171
THC0290_1041	1216850	1217986	-1	mrp	THC0290_v2_1104	mrp	ATP-binding protein, Mrp/Nbp35 family	0.770051	0.968857
THC0290_2143	2466519	2467517	-1	pdhA	THC0290_v2_2246	pdhA	Pyruvate dehydrogenase E1 component, alpha subunit	0.769625	0.952218
THC0290_0941	1108185	1110062	1		THC0290_v2_1002		Protein of unknown function	0.768771	0.924061
THC0290_0607	742118	743125	-1		THC0290_v2_0652		Cytochrome c oxidase family protein	0.766638	0.959044
THC0290_0158	196171	197463	1	pepP	THC0290_v2_0161	pepP	Xaa-Pro aminopeptidase	0.764078	0.937713
THC0290_0906	1066369	1067628	1		THC0290_v2_0966		Aminocarboxylic acid CoA-ligase	0.764078	0.923208
THC0290_0164	207374	207979	1	sodA	THC0290_v2_0167	sodA	Superoxide dismutase [Mn]	0.761945	0.958618
THC0290_1013	1193791	1194078	1		THC0290_v2_1076		Hypothetical lipoprotein precursor	0.761519	0.891212
THC0290_0151	184765	187650	-1		THC0290_v2_0154		Probable TonB-dependent outer membrane receptor precursor	0.760666	0.971416
THC0290_0786	935798	936937	-1		THC0290_v2_0840		Acyl-CoA dehydrogenase family protein	0.758959	0.906143
THC0290_1991	2316165	2318360	-1	recQ1	THC0290_v2_2093	recQ1	ATP-dependent DNA helicase RecQ1	0.758532	0.93558
THC0290_0943	1113417	1115108	-1		THC0290_v2_1004		Probably involved in regulation of translation initiation	0.756399	0.921502
THC0290_2310	2666206	2667102	-1		THC0290_v2_2422		Protein of unknown function precursor	0.755546	0.983788
THC0290_0313	382030	382551	1		THC0290_v2_0323		Probable acetyltransferase, GNAT family	0.754266	0.938567
THC0290_0154	190315	191256	-1	prsA	THC0290_v2_0157	prsA	Ribose-phosphate diphosphokinase	0.75384	0.944539
