# Supplementary material for: Transcriptome architecture and regulation at environmental transitions in flavobacteria: the case of an important fish pathogen
Source: ISME Commun. 2021 Jul 7;1:33. doi: 10.1038/s43705-021-00029-9 (PMC9723704; doi:10.1038/s43705-021-00029-9)
Supplement: Supplementary file 6 — Table S5 [file 43705_2021_29_MOESM6_ESM.xlsx]

## Sheet: Legend
Table S5: Differential expression analyses in 23 biological conditions in F. psychrophilum OSU THCO2-90.
Sheet	Description
Description of DE analyses	List of the 23 pairwise microarray comparisons resolved using the limma package with corresponding relevant biological description.
Limma_output	Full results of the 23 differential expression analyses performed with the limma package for 4109 features (namely, 2410 CDS, 50 RFAM features, 49 tRNAs, 18 rRNAs and 1582 new TRs).
DEG-list_per_condition	List of differentially expressed features for each pairwise comparison, induced (log2-FC > 1, FDR 5%) or repressed (log2-FC < -1, FDR 5%)..
Column	Description
DE_analysis_id	Identifier of each pairwise comparison indicated by Test.vs.Reference syntax.
Reference.samples	List of the microarray data used as reference (correspond to SampleName of Table S1).
Test.samples	List of the microarray data used as test (correspond to SampleName of Table S1).
Test.condition	Short description of the biological condition.
Description	Description of the corresponding experimental procedures.
Name	Gene name according to the F. psychrophilum THCO2-90 genome sequence LT670843.1.
Locustag	Locustag retrieved from the F. psychrophilum THCO2-90 genome, ENA accession number LT670843.1 ot unique identifier (THC0290_N_...) for new TRs annotated in this study.
Start	Coordinates according to the F. psychrophilum THCO2-90 genome sequence LT670843.1.
End	Coordinates according to the F. psychrophilum THCO2-90 genome sequence LT670843.1.
Strand	(+) for positive, (-) for negative strand.
Type	The different types of features are: CDS, gene, rRNA and tRNA retrieved from LT670843.1; misc_RNA and misc_feature retrieved from RFAM; new transcribed regions defined in this study.
Classif	Manually validated structural annotation of new transcribed regions (TRs). The different categories are: 5prime, 3prime and 3prime-PT (3' region transcribed after partial termination), Indep (regions transcribed independently of annotated CDSs), Intra (between two annotated CDSs) and repeated_regions.
Annotation	Description of the protein product.
Label_v2	Locustag retrieved from the F. psychrophilum THCO2-90 genome annotation of the MicroScope annotation platform (unpublished data).
Gene_v2	Gene name according to the F. psychrophilum THCO2-90 genome annotation of the MicroScope annotaiton platform (unpublished data).
Test.vs.Reference_logFC	Fold-change (log2-scale) for the pairwise comparison between "Test" and "Reference" conditions using R limma package differential expression analysis..
Test.vs.Reference_AveExpr	Average expression level (log2-scale) in the reference condition.
Test.vs.Reference_adj.P.Val	Adjusted p-value with a false discovery rate =0.05.
Regulation_type	Transcriptional effect observed in the pairwise comparison (induction for log2 FC >1 and repression for log2 FC < -1).

## Sheet: Description_of_DE_analyses
DE_analysis_id	Reference.samples	Test.samples	Test.condition	Description
Trans.vs.Expo	T1_a,T1_c	T3_a,T3_c	End of log-phase of growth	Differentially expressed genes in transition phase relative to exponential phase cells growing in TYES medium at 18°C 200 rpm.
Stat.vs.Expo	T1_a,T1_c	T5_a,T5_c	Stationary phase of growth	Differentially expressed genes in stationary phase relative to exponential phase cells growing in TYES medium at 18°C 200 rpm.
DIP.vs.Ctrl	CS3_a,CS3_c	DIP_a,DIP_c	Iron depletion	Differentially expressed genes in cells exposed to iron depletion (25 µM dipyridyl) relative to unstressed condition (OD600nm= 0.4, TYES medium at 18°C 200 rpm).
Plasma.vs.Ctrl	EP2_a,EP2_b	Plasma_a,Plasma_b	Exposure to fish plasma	Differentially expressed genes in cells incubated 15 min with rainbow trout plasma relative to control (1% peptone water washed cells without plasma) at 18°C 200 rpm.
T2-FCS.vs.T2	T2_a,T2_c	T2-FCS_a,T2-FCS_b	Fœtal Calf Serum supplementation	Differentially expressed genes in cells grown in TYES broth supplemented or not with 5% fœtal calf serum at 18°C 200 rpm (OD600nm=1.3).
TYESA-FCS.vs.TYESA	TYESA_a,TYESA_b	TYESA-FCS_a,TYESA-FCS_b	Fœtal Calf Serum supplementation agar	Differentially expressed genes in bacterial colonies grown in TYES-agar supplemented with 5% fœtal calf serum relative to not supplemented plates after 4 days at 18°C.
TYESA-0.5.vs.TYESA	TYESA_a,TYESA_b	TYESA-0.5_a,TYESA-0.5_b	Growth on low nutrient medium	Differentially expressed genes in bacterial colonies grown in TYES-agar containing 1/2 nutrients concentration relative to standard concentration after 4 days at 18°C.
TYESA-0.2.vs.TYESA	TYESA_a,TYESA_b	TYESA-0.2_a,TYESA-0.2_b	Growth on very low nutrient medium	Differentially expressed genes in bacterial colonies grown in TYES-agar containing 1/5 nutrients concentration relative to standard concentration after 4 days at 18°C.
Temp10C.vs.Ctrl	CS3_a,CS3_c	Temp10C_a,Temp10C_c	Growth at 10°C	Differentially expressed genes in cells grown at 10°C relative to 18°C (OD600nm=0.4, TYES at 200 rpm).
Temp4C.vs.Ctrl	CS3_a,CS3_c	Temp4C_a,Temp4C_c	Growth at 4°C	Differentially expressed genes in cells grown at 4°C relative to 18°C (OD600nm=0.4, TYES at 200 rpm).
NaCl.vs.Ctrl	CS3_a,CS3_c	NaCl_a,NaCl_c	High osmotic pressure	Differentially expressed genes in cells grown in TYES supplemented with 0.75% NaCl relative to unstressed condition (OD600nm=0.4, at 18°C 200 rpm).
HP.vs.Ctrl	CS1_a,CS1_b	HP_a,HP_b	Peroxide stress	Differentially expressed genes after 10 min exposure to 100 µM hydrogen peroxide relative to unstressed condition (OD600nm=0.8, TYES at 18°C 200 rpm).
LYSO.vs.Ctrl	CS1_a,CS1_b	LYSO_a,LYSO_b	Lysozyme stress	Differentially expressed genes after 10 min exposure to 100 µg/mL lysozyme relative to unstressed condition (OD600nm=0.8, TYES at 18°C 200 rpm).
AMOX.vs.Ctrl	CS2_a,CS2_b	AMOX_a,AMOX_b	Antibiotic stress	Differentially expressed genes after 1h exposure of exponential phase cells to sub-lethal concentration (400 µg/mL) of amoxicillin relative to unstressed condition (OD600nm=0.4, TYES at 18°C 200 rpm).
Anaer.vs.Ctrl	CS2_a,CS2_b	Anaer_a,Anaer_b	Oxygen limitation	Differentially expressed genes after 1h exposure to oxygen deprivation relative to standard condition (OD600nm=0.4, in TYES at 18°C and 200 rpm).
Water.vs.Ctrl	LAB_a,LAB_c	Water_a,Water_c	Growth in freshwater	Differentially expressed genes in cells maintained during 24h in aquarium containing 10L of dechlorinated water maintained at 10°C under vigorous aeration, relative to standard laboratory condition (TYES 18°C 200 rpm OD600nm=1).
FishWater.vs.Ctrl	LAB_a,LAB_c	FishWater_a,FishWater_c	Growth in freshwater with fish	Differentially expressed genes in cells maintained during 24h in aquarium containing 10L of dechlorinated water and 10 juvenile rainbow trout (5 g) maintained at 10°C under vigorous aeration, relative to standard laboratory condition (TYES 18°C 200 rpm OD600nm=1).
FishWater.vs.Water	Water_a,Water_c	FishWater_a,FishWater_c	Presence of fish	Differentially expressed genes in cells maintained during 24h in aquarium water containing fish (10 juvenile rainbow trout, 5 g) relative to no fish (10L of dechlorinated water maintained at 10°C under vigorous aeration).
HCl.vs.Ctrl	CS4_a,CS4_b	HCl_a,HCl_b	Acid stress	Differentially expressed genes after 5 min exposure to pH 6 (addition of HCl to a final concentration of 0.75 mM) relative to unstressed condition (OD600nm=0.5, TYES at 18°C and 200 rpm).
MUC.vs.Ctrl	EP_a,EP_b	MUC_a,MUC_b	Exposure to fish mucus	Differentially expressed genes in cells incubated 15 min with skin mucus of rainbow trout relative to unstressed condition (cells resuspended in 1% peptone water without mucus, at 18°C 200 rpm).
TYESA-Blood.vs.Ctrl	TYESA_a,TYESA_b	TYESA-Blood_a,TYESA-Blood_b	Blood supplementation on solid medium	Differentially expressed genes in bacterial colonies grown in TYES-agar covered by 10% defibrinated horse blood relative to no blood overlay, after 4 days at 18°C.
Blood.vs.Ctrl	TYESA_a,TYESA_b	Blood_a,Blood_b	Growth on blood relative to standard medium	Differentially expressed genes in bacterial colonies grown in 10% defibrinated horse blood agar relative to standard TYES agar, after 5 days at 18°C.
Blood.vs.TYESA-0.2	TYESA-0.2_a,TYESA-0.2_b	Blood_a,Blood_b	Growth on blood relative to poor nutrient medium	Differentially expressed genes in bacterial colonies grown in 10% defibrinated horse blood agar relative to TYES-agar containing 1/5 nutrients concentration, after 5 days at 18°C.

## Sheet: Limma_output
Name	Locustag	Start	End	Strand	Type	Classif	Annotation	Label_v2	Gene_v2	Trans.vs.Expo_logFC	Trans.vs.Expo_AveExpr	Trans.vs.Expo_adj.P.Val	Stat.vs.Expo_logFC	Stat.vs.Expo_AveExpr	Stat.vs.Expo_adj.P.Val	DIP.vs.Ctrl_logFC	DIP.vs.Ctrl_AveExpr	DIP.vs.Ctrl_adj.P.Val	Plasma.vs.Ctrl_logFC	Plasma.vs.Ctrl_AveExpr	Plasma.vs.Ctrl_adj.P.Val	T2-FCS.vs.T2_logFC	T2-FCS.vs.T2_AveExpr	T2-FCS.vs.T2_adj.P.Val	TYESA-FCS.vs.TYESA_logFC	TYESA-FCS.vs.TYESA_AveExpr	TYESA-FCS.vs.TYESA_adj.P.Val	TYESA-0.5.vs.TYESA_logFC	TYESA-0.5.vs.TYESA_AveExpr	TYESA-0.5.vs.TYESA_adj.P.Val	TYESA-0.2.vs.TYESA_logFC	TYESA-0.2.vs.TYESA_AveExpr	TYESA-0.2.vs.TYESA_adj.P.Val	Temp10C.vs.Ctrl_logFC	Temp10C.vs.Ctrl_AveExpr	Temp10C.vs.Ctrl_adj.P.Val	Temp4C.vs.Ctrl_logFC	Temp4C.vs.Ctrl_AveExpr	Temp4C.vs.Ctrl_adj.P.Val	NaCl.vs.Ctrl_logFC	NaCl.vs.Ctrl_AveExpr	NaCl.vs.Ctrl_adj.P.Val	HP.vs.Ctrl_logFC	HP.vs.Ctrl_AveExpr	HP.vs.Ctrl_adj.P.Val	LYSO.vs.Ctrl_logFC	LYSO.vs.Ctrl_AveExpr	LYSO.vs.Ctrl_adj.P.Val	AMOX.vs.Ctrl_logFC
rnr	THC0290_0001	554	2728	1	CDS		Ribonuclease R	THC0290_v2_0001	rnr	0.26	11.45	0.1511	-0.09	11.28	0.73514	0.1	11.44	0.59943	1.04	11.91	0.00296	0.27	11.68	0.29138	0.99	12.73	0.08318	1.47	12.97	0.03574	0.64	12.56	0.12055	0.58	11.68	0.1016	0.79	11.78	0.06842	1.21	11.99	0.01407	0.7	11.78	0.01183	-0.12	11.37	1	0.08
	THC0290_0002	2737	3408	1	CDS		Protein of unknown function precursor	THC0290_v2_0002		0.31	11.49	0.1037	-0.73	10.97	0.06888	0.25	11.44	0.19584	1.49	11.91	0.00107	0.06	11.56	0.81647	-0.21	11.89	0.38031	-0.78	11.6	0.04523	-1.03	11.48	0.07467	0.7	11.66	0.06743	0.7	11.67	0.04707	1.39	12.01	0.00813	0.82	11.6	0.01183	-0.06	11.17	1	-0.08
	THC0290_N_0001	3409	3490	1	Region	intra	new TR			0.12	8.87	0.75704	0.24	8.93	0.34657	0.31	9.06	0.18475	1.92	9.44	0.00144	0.29	9.04	0.2665	-0.02	14.68	0.99876	-1.78	13.8	0.36447	1.55	15.47	0.40714	0.55	9.18	0.13872	0.76	9.29	0.06034	1.43	9.62	0.01956	0.65	9.06	0.00764	-0.14	8.67	1	-0.01
	THC0290_0003	3517	4200	1	CDS		Probable transmembrane protein of unknown function	THC0290_v2_0003		0.17	10.75	0.52435	-0.3	10.51	0.1188	0.04	10.74	0.88631	1.37	11.26	0.00204	0.26	10.82	0.39486	-0.31	11.36	0.39349	-0.64	11.2	0.0786	-0.29	11.37	0.36386	0.35	10.89	0.29177	0.54	10.99	0.12544	1.15	11.29	0.02198	0.68	10.75	0.00643	-0.04	10.39	1	-0.06
	THC0290_N_0004	4241	4559	1	Region	3prime-PT	new TR			0.83	6.04	0.14448	1.28	6.26	0.01302	-0.21	6.03	0.54938	3.43	7.74	0.00053	0.26	5.79	0.80315	0.88	7.51	0.14855	-0.75	6.69	0.77628	1.57	7.85	0.06759	-0.21	6.03	0.65044	-0.09	6.09	0.87848	1	6.64	0.0254	0.43	6.11	0.34332	0.58	6.18	1	-0.58
	THC0290_tRNA_0001	4244	4317	-1	tRNA		transfer RNA-Cys			1.45	8.78	0.12374	3.91	10.01	0.00183	-0.27	8.05	0.16783	1.05	10.16	0.13577	0.11	8.39	0.84671	1.72	11.66	0.1098	2.77	12.18	0.05839	3.52	12.56	0.04048	0.2	8.29	0.63244	0.22	8.3	0.42394	0.1	8.24	0.72717	0.44	8.86	0.09164	0.07	8.68	1	-0.66
	THC0290_N_0005	4330	4421	-1	Region	5prime	new TR			0.22	4.18	0.26091	0.25	4.19	0.17817	0.03	3.97	0.80877	-0.15	3.93	0.16703	-0.07	4.06	0.71042	0.82	4.51	0.47917	1.27	4.74	0.05757	0.96	4.58	0.46415	0.01	3.96	0.95782	0.09	4	0.69565	0.01	3.96	0.97973	0.13	4.03	0.50783	0.16	4.04	1	-0.02
folB	THC0290_0004	4422	4781	-1	CDS		Dihydroneopterin aldolase	THC0290_v2_0004	folB	1.43	10.13	0.00448	2.14	10.48	0.00143	0.57	9.55	0.04244	-0.87	9.95	0.10847	0.04	10.2	0.91703	0.29	11.09	0.22578	0.23	11.06	0.49998	0.48	11.19	0.33975	0.23	9.38	0.55861	0.25	9.39	0.34517	0.47	9.5	0.11127	0.57	9.74	0.04199	0.14	9.52	1	0.07
glnS	THC0290_0005	4885	6972	1	CDS		Glutamine--tRNA ligase	THC0290_v2_0005	glnS	-0.31	11.09	0.06671	-0.26	11.12	0.19393	-0.44	11.06	0.03663	0.2	10.84	0.21147	0.19	11.05	0.34894	-0.14	10.86	0.5489	-0.52	10.67	0.08346	-0.88	10.49	0.07779	0.03	11.29	0.9167	0.05	11.3	0.85991	-0.04	11.26	0.80799	-0.11	11.17	0.37131	-0.01	11.22	1	0.09
	THC0290_N_0006	5284	5631	-1	Region	indep	new TR			1.33	5.55	0.02308	2.45	6.1	0.00958	1.14	5.3	0.04631	1.58	7.13	0.01147	-0.2	5.53	0.6741	-0.21	7.15	0.88257	0.06	7.28	0.87833	0.47	7.48	0.68591	0.37	4.92	0.47497	-0.1	4.68	0.89424	2.25	5.86	0.0207	0.58	5.14	0.09544	0.35	5.03	1	-0.38
	THC0290_0006	7285	7614	1	CDS		Hypothetical protein precursor	THC0290_v2_0006		1.16	13.03	0.00906	0.84	12.87	0.08447	0.38	12.77	0.34454	-1.71	12.18	0.0006	-0.03	12.99	0.90107	0.83	15.35	0.08385	1.06	15.46	0.03343	1.43	15.65	0.0414	-0.42	12.37	0.43727	-0.32	12.42	0.50783	1.32	13.24	0.05367	0.67	12.74	0.00709	0.05	12.43	1	-0.38
	THC0290_0007	7614	7964	1	CDS		Probable transmembrane protein of unknown function	THC0290_v2_0007		1.49	13.45	0.00339	1.22	13.32	0.00699	0.59	13.04	0.19913	-0.77	12.96	0.01489	-0.09	13.31	0.74707	0.31	15.36	0.27325	0.25	15.33	0.24693	0.38	15.4	0.22718	-0.41	12.54	0.45098	-0.31	12.58	0.52352	1.5	13.49	0.0462	0.72	12.91	0.01228	0.09	12.6	1	-0.2
	THC0290_0008	7968	8222	1	CDS		Protein of unknown function	THC0290_v2_0008		1.51	13.33	0.00482	1.75	13.45	0.00213	0.59	12.87	0.15967	-1.06	12.71	0.00154	-0.11	13.17	0.75565	0.05	15.41	0.83795	-0.29	15.24	0.24013	-0.11	15.33	0.7408	-0.28	12.43	0.58029	-0.23	12.46	0.65269	1.65	13.4	0.02658	0.77	12.83	0.00689	0.12	12.51	1	-0.28
	THC0290_N_0007	8197	8243	-1	Region	3prime	new TR			-0.03	3.88	0.79476	2.99	5.39	0.00123	-0.02	3.92	0.91031	0	3.88	0.98884	0.04	3.88	0.84367	0.93	4.39	0.44584	3.78	5.82	0.02834	0.25	4.06	0.5054	0	3.93	0.99335	-0.05	3.91	0.85929	0	3.93	0.98617	0.38	4.07	0.28334	0.02	3.89	1	-0.5
	THC0290_N_0008	8228	8499	1	Region	3prime-PT	new TR			1.83	6.72	0.02484	3.8	7.7	0.00146	0.22	6.05	0.15858	-0.03	6.8	0.81185	-0.43	5.94	0.37957	1.52	8.89	0.08303	1.09	8.67	0.06329	2.45	9.36	0.03469	-0.31	5.78	0.27817	-0.12	5.87	0.67651	1.15	6.51	0.0124	2.08	6.7	0.00329	0.13	5.72	1	-0.4
	THC0290_0009	8244	9227	-1	CDS		Band 7 family protein	THC0290_v2_0009		0.65	11.91	0.02772	1.53	12.35	0.00194	-0.05	11.39	0.73104	-0.31	12.73	0.03179	-0.07	11.85	0.70585	-0.13	12.43	0.61024	0.09	12.54	0.6102	2.05	13.52	0.03602	0.52	11.68	0.09024	0.64	11.74	0.05019	-0.81	11.01	0.01531	0.62	11.87	0.00818	0.01	11.57	1	-0.01
	THC0290_N_0009	9251	9388	-1	Region	intra	new TR			-1.39	7.01	0.02974	0.08	7.74	0.7397	-0.64	7.4	0.03163	-1.35	6.04	0.03446	0.19	6.83	0.66523	0.84	7.34	0.10327	-0.35	6.75	0.28423	-1.91	5.97	0.11853	0.57	8.01	0.09544	0.8	8.12	0.04417	-1	7.22	0.04495	-0.41	7.17	0.0416	0.03	7.39	1	-0.08
gltX	THC0290_0010	9389	10894	-1	CDS		Glutamate--tRNA ligase	THC0290_v2_0010	gltX	-0.94	10.68	0.00757	-0.08	11.11	0.58925	-0.58	10.85	0.01677	-0.62	10.03	0.00805	-0.04	10.53	0.81647	0	10.72	0.99374	-0.51	10.47	0.13917	-0.41	10.52	0.42885	0.61	11.45	0.0787	0.6	11.44	0.06479	-0.86	10.72	0.01416	-0.16	10.79	0.1735	0.03	10.89	1	0.17
	THC0290_N_0010	10630	10929	1	Region	indep	new TR			1.35	5.4	0.00758	2.72	6.08	0.00109	-0.37	4.69	0.2324	2.3	7.88	0.00066	-0.21	5.36	0.51814	-0.03	7.21	0.98686	-0.67	6.89	0.06481	0.15	7.3	0.92364	-0.63	4.56	0.15331	-0.84	4.45	0.08187	2.2	5.97	0.01066	0.14	5.13	0.26005	0.11	5.11	1	-0.06
	THC0290_0011	11189	14521	1	CDS		Putative chromosome segregation ATPase	THC0290_v2_0011		0.03	10.06	0.83234	0.23	10.16	0.51526	0.09	10.16	0.5156	0.84	10.72	0.00722	0	10.22	1	0.44	12.06	0.14897	-0.49	11.59	0.0867	-0.93	11.37	0.07395	-0.41	9.91	0.14492	-0.45	9.89	0.10164	0.95	10.59	0.01365	0.41	10.37	0.03292	0.01	10.17	1	-0.14
	THC0290_0012	14514	14936	1	CDS		Endoribonuclease YbeY	THC0290_v2_0012	ybeY	-0.28	9.47	0.13808	0.68	9.95	0.01695	-0.12	9.82	0.5371	0.89	9.8	0.02221	-0.05	9.57	0.80763	0.06	11.19	0.84175	-0.64	10.84	0.08904	-1.16	10.58	0.17926	0.02	9.89	0.95782	-0.12	9.82	0.63667	0.36	10.06	0.11897	0.36	10.17	0.18546	-0.05	9.97	1	-0.28
	THC0290_N_0011	14969	15146	1	Region	5prime	new TR			-0.65	9.75	0.0309	0.56	10.35	0.02783	-0.44	9.81	0.04487	0.57	10.02	0.02122	-0.25	9.69	0.32983	0.17	11.1	0.61339	-0.68	10.67	0.05752	-0.86	10.58	0.26433	0.05	10.05	0.87906	-0.05	10	0.82288	0.3	10.18	0.10971	0.24	10.13	0.12874	-0.07	9.97	1	-0.39
gidA	THC0290_0013	15147	17018	1	CDS		tRNA uridine 5-carboxymethylaminomethyl modification enzyme GidA	THC0290_v2_0013	gidA	-0.71	10.78	0.04642	-0.57	10.85	0.10449	-0.25	10.89	0.21328	0.42	11.06	0.02933	-0.12	10.83	0.57586	-0.45	11.1	0.22792	-0.92	10.87	0.05537	-1.49	10.58	0.03864	0.13	11.08	0.67024	0.15	11.09	0.553	0.16	11.1	0.55698	0.02	11.22	0.88976	-0.01	11.2	1	0
	THC0290_N_0012	17019	17181	1	Region	3prime	new TR			-0.66	10.22	0.01511	-0.86	10.12	0.00501	-0.19	10.48	0.31592	0.67	10.17	0.00366	0.08	10.3	0.68867	-0.52	10.45	0.12621	-0.85	10.29	0.06172	-2.46	9.48	0.12634	0.11	10.63	0.70532	0.06	10.61	0.85039	0.2	10.68	0.38668	0.02	10.61	0.87379	-0.05	10.57	1	0.02
	THC0290_0014	17182	18030	1	CDS		Probable SAM-dependent methyltransferase	THC0290_v2_0014		-0.73	10.71	0.008	-1.66	10.24	0.00171	-0.43	10.91	0.04678	0.52	10.51	0.0079	-0.04	10.74	0.82547	-0.53	10.3	0.1077	-0.88	10.13	0.03674	-1.76	9.69	0.03738	-0.01	11.12	0.98389	-0.05	11.1	0.85918	-0.1	11.08	0.59845	-0.33	10.99	0.14086	-0.04	11.13	1	-0.01
	THC0290_N_0013	18031	18294	1	Region	3prime	new TR			-1.08	10.24	0.0046	-3.45	9.06	0.0091	-0.35	10.57	0.06148	0.99	9.9	0.00288	-0.06	10.27	0.79698	-0.53	9.69	0.12053	-0.86	9.53	0.05388	-4.72	7.6	0.06526	0.06	10.77	0.84044	-0.14	10.67	0.54009	-0.08	10.7	0.67757	-0.43	10.51	0.05182	0.01	10.72	1	0.12
	THC0290_0015	18295	18858	1	CDS		Probable outer membrane lipoprotein precursor, OmpH family	THC0290_v2_0015		-1	12.12	0.00525	-2.65	11.29	0.00389	-0.74	12.35	0.02719	0.42	11.02	0.01275	0.2	12.56	0.40468	-0.23	10.85	0.43762	-0.22	10.86	0.42968	-0.46	10.74	0.27457	-0.25	12.59	0.36217	-0.11	12.66	0.68233	-0.32	12.56	0.17442	-1.44	12.05	0.00453	-0.11	12.72	1	-0.16
	THC0290_N_0014	18906	19034	1	Region	5prime	new TR			-1.22	5.9	0.03448	-1.11	5.96	0.41838	-1.02	6.09	0.01613	2.21	5.54	0.00941	0.12	5.83	0.69799	-0.14	3.94	0.62966	1.89	4.95	0.39259	1.79	4.9	0.38547	0.18	6.69	0.45845	0.41	6.8	0.14246	-0.35	6.42	0.11932	0.53	6.21	0.19741	0.17	6.03	1	0.08
	THC0290_0016	19035	21308	1	CDS		Probable helicase	THC0290_v2_0016		0.17	9.64	0.25336	0.39	9.74	0.05695	-0.11	9.61	0.59659	0.87	10.12	0.00297	0.04	9.61	0.83288	-0.45	9.26	0.1328	-0.53	9.21	0.1544	-1.26	8.85	0.07617	-0.2	9.57	0.52936	-0.44	9.45	0.15131	0.18	9.76	0.5388	0.1	9.78	0.5916	0.04	9.75	1	0.06
	THC0290_N_0015	21309	21961	1	Region	3prime	new TR			0.81	7.87	0.04202	1.71	8.32	0.00154	0.07	7.52	0.78757	1.21	8.05	0.00402	0.09	7.68	0.69443	0.1	8.01	0.90981	-1.3	7.31	0.51462	1.96	8.94	0.03738	-0.18	7.39	0.61102	0.01	7.48	0.99336	0.28	7.62	0.45973	-0.36	7.52	0.15248	-0.17	7.62	1	-0.12
	THC0290_N_0016	21441	22155	-1	Region	3prime	new TR			0.58	7.6	0.16309	0.11	7.36	0.59016	0.36	7.93	0.05173	2.11	9.48	0.00109	0.11	7.4	0.52865	0.75	8.47	0.24457	-0.58	7.8	0.30731	0.11	8.15	0.80517	-1.07	7.21	0.04332	-0.8	7.35	0.06524	-0.51	7.5	0.0393	0.42	7.46	0.12905	0.15	7.32	1	-0.18
	THC0290_0017	22156	22707	-1	CDS		Protein of unknown function	THC0290_v2_0018		0.49	9.9	0.05189	-0.7	9.31	0.24514	0.53	10.08	0.02316	1.28	11.43	0.00153	-0.11	9.67	0.56448	-0.15	10.08	0.60234	-0.09	10.11	0.70798	0.22	10.27	0.4371	-0.78	9.42	0.06553	-0.59	9.52	0.07847	-0.17	9.73	0.3476	0.42	9.82	0.09706	-0.09	9.56	1	-0.11
	THC0290_N_0017	22708	22762	-1	Region	intra	new TR			0.62	9.5	0.01177	-0.79	8.8	0.23078	0.06	9.52	0.74713	1.49	10.98	0.0016	-0.06	9.36	0.88528	-0.44	9.67	0.22717	-0.05	9.86	0.88387	-0.57	9.6	0.19106	-0.4	9.29	0.20526	-0.69	9.14	0.06189	-0.05	9.46	0.85082	0.73	9.52	0.00707	0.01	9.16	1	-0.35
	THC0290_0018	22763	23272	-1	CDS		Probable cAMP-binding protein	THC0290_v2_0019		0.33	10.67	0.05922	-0.96	10.02	0.02311	0.03	10.55	0.86355	1.26	12.29	0.00227	-0.03	10.43	0.87765	-0.32	10.52	0.22717	-0.32	10.52	0.17576	-0.57	10.39	0.12152	-0.32	10.38	0.23012	-0.53	10.27	0.11735	-0.16	10.46	0.37466	0.68	10.58	0.00768	0.01	10.24	1	-0.07
	THC0290_0019	23309	23692	-1	CDS		Probable transmembrane protein of unknown function	THC0290_v2_0020		0.48	10.83	0.02075	0.1	10.64	0.63113	-0.16	10.67	0.28167	0.86	12.27	0.0019	-0.05	10.67	0.78019	-0.07	10.75	0.8635	-0.02	10.78	0.92372	-0.14	10.72	0.68305	-0.3	10.6	0.22728	-0.34	10.58	0.16341	-0.27	10.62	0.1516	0.44	10.8	0.01665	-0.04	10.56	1	-0.02
holB	THC0290_0020	23822	24970	-1	CDS		Probable DNA polymerase III, delta prime subunit	THC0290_v2_0021	holB	0.28	10.64	0.20729	0.6	10.8	0.01265	-0.16	10.62	0.2588	0.61	11.08	0.0285	0.16	10.49	0.38291	0.6	10.99	0.09732	0.61	11	0.05558	1.09	11.24	0.04948	-0.61	10.39	0.07446	-0.94	10.23	0.03506	-0.27	10.56	0.15547	0.71	10.85	0.00944	0.01	10.5	1	-0.05
	THC0290_N_0018	24970	25238	1	Region	5prime	new TR			0.75	5.86	0.01979	2.15	6.56	0.00164	0.61	6.2	0.09619	3.74	7.15	0.00369	-0.28	5.78	0.69263	0.06	7.88	0.92036	-1.09	7.3	0.13762	0.6	8.14	0.4455	-0.38	5.7	0.37524	-0.5	5.64	0.14499	0.47	6.13	0.10745	0.8	5.96	0.00713	0.16	5.64	1	0.03
	THC0290_N_0019	25240	25332	1	Region	5prime	new TR			-0.13	12.29	0.44768	-0.32	12.2	0.22903	-0.43	12.32	0.06486	3.17	13.61	0.00053	0.18	12.5	0.36672	-0.51	12.58	0.32912	-0.68	12.5	0.12678	0.88	13.28	0.1124	-0.91	12.08	0.06576	-0.97	12.04	0.0374	2.55	13.81	0.00575	-0.83	12.18	0.01228	-0.01	12.59	1	0.05
	THC0290_N_0020	25333	25398	1	Region	5prime	new TR			-0.92	4.96	0.00665	1.03	5.93	0.02284	0.31	5.4	0.40073	2.2	6.38	0.00714	0.12	5.58	0.79499	-1.41	5.53	0.15316	1.29	6.87	0.27699	-0.12	6.17	0.96738	-1.2	4.64	0.03704	-0.99	4.75	0.04707	2.22	6.35	0.02462	-1.3	4.8	0.00726	-0.07	5.41	1	0.15
remF	THC0290_0021	25399	25836	1	CDS		Gliding motility protein RemF precursor	THC0290_v2_0022	remF	0.46	14.1	0.02988	0.1	13.92	0.60301	0.18	14.06	0.36518	1.27	14.88	0.00086	0.02	14.28	0.94093	-0.49	13.83	0.17782	-0.79	13.67	0.05361	0.29	14.21	0.40245	-0.68	13.63	0.08904	-0.74	13.6	0.05609	1.62	14.78	0.01179	-0.32	13.99	0.10492	-0.05	14.13	1	-0.02
remG	THC0290_0022	25871	27163	1	CDS		Gliding motility protein RemG precursor	THC0290_v2_0023	remG	0.6	14.31	0.01659	0.94	14.48	0.03302	0.38	14.18	0.06562	0.64	15.35	0.0041	-0.02	14.4	0.93812	-0.58	14.4	0.27975	-0.95	14.22	0.104	0.52	14.95	0.2962	-0.64	13.67	0.08744	-0.85	13.57	0.04397	1.95	14.96	0.00604	0.06	14.33	0.63127	-0.1	14.25	1	0.13
	THC0290_N_0021	27164	27223	1	Region	intra	new TR			-0.18	10.68	0.44652	0.87	11.2	0.0337	-0.19	10.93	0.29947	0.95	12.42	0.00789	0.4	10.91	0.16355	-0.72	11.6	0.09046	-0.9	11.5	0.04161	-0.05	11.93	0.8774	-1.01	10.52	0.06011	-1.07	10.49	0.03462	1.63	11.84	0.00771	0.11	11.03	0.75922	-0.05	10.95	1	0.39
	THC0290_N_0022	27224	27295	1	Region	intra	new TR			-0.12	11.26	0.6252	0.81	11.72	0.01143	0.01	11.39	0.96086	0.78	13.1	0.00483	0.2	11.41	0.44409	-0.68	11.91	0.09037	-0.91	11.8	0.06423	0.08	12.29	0.8006	-0.78	10.99	0.08211	-0.96	10.9	0.0374	1.48	12.12	0.01673	0.3	11.49	0.05661	0.05	11.36	1	0.17
sprC	THC0290_0023	27296	28729	1	CDS		Putative adhesin precursor SprC	THC0290_v2_0024	sprC	0.3	12.39	0.07758	0.97	12.73	0.00408	0.15	12.34	0.41271	0.58	13.88	0.007	0	12.43	0.99247	-0.65	12.79	0.1266	-0.74	12.74	0.04138	0.09	13.16	0.8093	-0.84	11.84	0.08211	-1.25	11.64	0.03187	1.66	13.1	0.01557	0.28	12.51	0.1009	0.02	12.38	1	-0.01
sprD	THC0290_0024	28731	32459	1	CDS		Putative cell surface protein precursor SprD	THC0290_v2_0025	sprD	0.28	11.91	0.09553	0.68	12.11	0.00889	0.22	11.98	0.23301	1.11	13.7	0.00241	0.11	12.18	0.60125	-1.18	12.33	0.09679	-0.85	12.49	0.04562	-0.29	12.77	0.42188	-1.05	11.34	0.05144	-1.24	11.25	0.03187	1.87	12.81	0.01173	0.5	12.4	0.01486	-0.05	12.13	1	0.11
	THC0290_N_0023	32460	32570	1	Region	3prime	new TR			1.14	6.02	0.01289	2.94	6.92	0.00135	1.08	6.18	0.0588	-0.28	5.68	0.77816	-0.27	5.65	0.29138	1.61	11.12	0.1601	0.48	10.55	0.66563	2.71	11.67	0.09435	-0.11	5.59	0.87474	-0.11	5.59	0.89433	0.67	5.98	0.19318	1.28	6.22	0.02406	0.32	5.74	1	0.13
sprB	THC0290_0025	32571	43136	1	CDS		Putative adhesin precursor SprB (modular protein)	THC0290_v2_0026	sprB	0.78	13.15	0.02078	0.71	13.11	0.05253	0.58	12.97	0.03079	0.06	14.23	0.58793	-0.14	13.32	0.5382	-1.56	12.8	0.08385	-1	13.08	0.04118	-0.84	13.16	0.07871	-0.73	12.32	0.0701	-0.8	12.28	0.0468	1.46	13.41	0.01342	0.65	13.36	0.01063	0.08	13.08	1	0.14
	THC0290_N_0024	43137	43182	1	Region	intra	new TR			1.07	4.51	0.12318	1.61	4.78	0.10161	0.99	4.55	0.01427	-0.15	5.84	0.63894	0.41	4.67	0.6538	-2.46	5.08	0.07605	-2.33	5.15	0.02834	-2.46	5.08	0.03176	-0.15	3.97	0.50896	-0.12	3.99	0.60981	0.7	4.4	0.01956	-0.59	4.23	0.1054	-0.66	4.19	1	-0.07
sprF	THC0290_0026	43183	44154	1	CDS		Putative cell surface protein precursor SprF	THC0290_v2_0027	sprF	1.33	13.16	0.00478	1.47	13.23	0.00353	0.88	13.06	0.01196	0.33	13.93	0.04064	-0.17	13.39	0.4198	-1.59	12.88	0.11057	-0.85	13.25	0.03887	-0.86	13.24	0.06929	-0.76	12.24	0.06742	-0.74	12.25	0.04707	1.51	13.37	0.01135	0.33	13.3	0.03955	-0.04	13.12	1	0.22
	THC0290_N_0025	44155	44282	1	Region	intra	new TR			0.75	11.51	0.00865	0.93	11.6	0.00393	1.07	11.48	0.07488	-0.39	11.41	0.10644	-0.01	11.91	0.97442	-0.65	11.45	0.26945	-0.94	11.3	0.03787	-1.01	11.26	0.063	-0.45	10.72	0.43216	-0.69	10.61	0.26536	1.67	11.79	0.03988	0.51	11.82	0.12022	0.11	11.62	1	0.13
pgk	THC0290_0027	44283	45470	1	CDS		Phosphoglycerate kinase	THC0290_v2_0028	pgk	0.59	12.73	0.02312	-0.03	12.42	0.87471	0.67	12.47	0.09232	0.2	12.86	0.19024	-0.17	12.87	0.42516	-0.31	11.97	0.2077	-0.2	12.02	0.32118	-0.74	11.75	0.10096	-0.56	11.85	0.26349	-0.78	11.74	0.11108	0.91	12.59	0.06041	-0.06	12.54	0.7117	0.2	12.67	1	0.16
	THC0290_N_0026	45471	45575	1	Region	intra	new TR			0.65	12.95	0.01173	-0.31	12.47	0.08619	0.73	12.9	0.01628	0.49	13.06	0.01696	-0.02	13.19	0.95662	0.11	12.1	0.62966	-0.06	12.02	0.81825	-0.45	11.82	0.62785	-0.76	12.15	0.08399	-0.78	12.15	0.05077	0.96	13.01	0.01609	-0.37	12.85	0.03173	-0.06	13	1	0.09
mltD	THC0290_0028	45576	47672	1	CDS		Membrane-bound lytic murein transglycosylase D precursor	THC0290_v2_0029	mltD	0.42	12.07	0.03556	-1.01	11.36	0.0134	0.39	12.1	0.04996	1.07	12.18	0.00209	0.01	12.31	0.95662	-0.15	11.51	0.50635	-0.16	11.51	0.55494	-0.13	11.53	0.68602	-0.94	11.43	0.04705	-0.96	11.42	0.03187	1.24	12.52	0.01111	-0.35	12	0.03384	-0.07	12.14	1	-0.01
	THC0290_N_0027	47673	47728	1	Region	3prime	new TR			-0.06	3.91	0.66566	-0.07	3.91	0.62814	0.05	3.9	0.74713	-0.03	3.87	0.79186	-0.02	3.91	0.94117	-1.2	4.6	0.45945	-1.26	4.57	0.40721	1.05	5.72	0.73684	0.01	3.88	0.96077	0.4	4.08	0.41993	0.05	3.9	0.76655	0.06	3.91	0.65937	0.01	3.89	1	-0.29
elaA	THC0290_0029	47729	48178	1	CDS		ElaA protein	THC0290_v2_0030	elaA	1.34	9.39	0.00507	2.11	9.78	0.00202	0.44	9.08	0.05344	0.03	9.27	0.76967	-0.05	8.95	0.86831	1.25	10.46	0.09046	1.68	10.67	0.03787	1.75	10.71	0.05531	-0.34	8.69	0.33223	-0.35	8.69	0.2024	0.63	9.17	0.04035	1.1	9.5	0.0081	0.11	9	1	-0.22
	THC0290_0030	48175	48993	-1	CDS		Probable outer membrane protein precursor, OmpA family	THC0290_v2_0031		0.66	7.79	0.00945	0.98	7.95	0.00771	0.35	7.6	0.17129	0.4	7.71	0.50904	0.19	7.93	0.3517	0.97	8.48	0.08699	0.4	8.2	0.30711	1.08	8.54	0.05933	-0.39	7.23	0.28269	-0.62	7.12	0.12258	0.19	7.53	0.59556	-0.21	7.64	0.14517	-0.09	7.69	1	-0.14
	THC0290_N_0028	48179	48337	1	Region	3prime	new TR			0.95	7.93	0.00609	1.55	8.23	0.00503	0.33	7.58	0.17129	1.65	8	0.00113	-0.24	7.41	0.44097	1.45	8.47	0.08303	-1.58	6.95	0.53325	-1.02	7.23	0.12761	-0.5	7.17	0.18215	-0.62	7.1	0.08295	0.8	7.82	0.02813	1.15	8.1	0.00713	-0.19	7.43	1	-0.17
	THC0290_N_0029	49141	49425	1	Region	indep	new TR			1.55	8.49	0.058	2.42	8.93	0.00142	0.52	7.85	0.24354	1.06	8.67	0.00903	0.2	7.93	0.40779	1.63	10.29	0.08303	2.3	10.62	0.03562	2.57	10.76	0.03738	0.34	7.76	0.46626	0.37	7.78	0.48217	0.01	7.6	0.97973	1.06	8.51	0.00356	0.17	8.06	1	-0.3
	THC0290_N_0030	49569	49619	1	Region	5prime	new TR			0.99	9.94	0.02729	2.57	10.73	0.00109	-0.2	9.75	0.32883	-0.85	9.97	0.02546	0.17	9.59	0.48926	0.44	11.17	0.14595	1.05	11.47	0.03807	0.78	11.34	0.34051	-0.66	9.52	0.06743	-0.49	9.61	0.19061	-0.6	9.56	0.02578	1.71	10.55	0.00625	-0.12	9.64	1	0.07
yceA	THC0290_0031	49620	50978	1	CDS		Protein of unknown function YceA	THC0290_v2_0032	yceA	0.67	11.05	0.01027	2.13	11.79	0.00112	0.18	10.87	0.33636	-0.84	11.31	0.00629	0	10.57	1	0.1	11.81	0.66688	0.09	11.81	0.60794	0.34	11.93	0.29143	-0.17	10.7	0.54619	-0.42	10.57	0.14789	-0.23	10.66	0.26859	2.04	11.68	0.00245	0.02	10.67	1	0.06
	THC0290_N_0031	51080	51148	1	Region	5prime	new TR			0.06	7.41	0.79105	1.9	8.33	0.00404	-0.08	7.54	0.62368	-0.68	7.56	0.00391	0.29	7.23	0.58648	0.13	8.78	0.54442	1.33	9.38	0.03974	1.93	9.68	0.0493	-0.08	7.54	0.75621	-0.13	7.51	0.63166	-0.27	7.44	0.36967	1.57	8.4	0.00666	-0.43	7.39	1	-0.23
fjo17	THC0290_0032	51149	52540	1	CDS		Protein of unknown function Fjo17	THC0290_v2_0033	fjo17	-0.02	12.09	0.87212	-0.42	11.9	0.06725	0.07	12	0.69627	-1.5	11.57	0.00069	0.04	12.22	0.8546	0.02	11.41	0.95436	0	11.4	1	0.49	11.64	0.37735	0.14	12.03	0.6009	0.12	12.02	0.65862	-0.31	11.81	0.24079	0.24	12.17	0.20986	0.06	12.07	1	-0.07
gldH	THC0290_0033	52515	53027	1	CDS		Gliding motility lipoprotein precursor GldH	THC0290_v2_0034	gldH	-0.06	11.92	0.63067	-0.92	11.49	0.02436	0.16	12.05	0.35731	-1.8	11.48	0.00055	0.04	12.13	0.87066	-0.38	11	0.308	-0.61	10.88	0.05317	-0.88	10.75	0.07043	-0.17	11.89	0.51735	-0.09	11.93	0.74163	-0.42	11.76	0.08042	0.13	12.1	0.43209	-0.02	12.02	1	0.03
mrcA	THC0290_0034	53033	55357	1	CDS		Penicillin-binding protein 1A	THC0290_v2_0035	mrcA	0.04	12.06	0.80501	-0.56	11.76	0.01497	0.03	11.93	0.94196	-1.92	11.82	0.00141	0.09	12.23	0.67661	-0.6	11.07	0.2226	-0.39	11.17	0.16701	-0.87	10.93	0.07407	0.12	11.97	0.78673	-0.11	11.86	0.8093	-0.36	11.74	0.43479	-0.09	12.03	0.43209	-0.03	12.07	1	-0.05
	THC0290_N_0032	55358	55525	1	Region	intra	new TR			0.08	10.36	0.75321	-0.17	10.24	0.30992	-0.13	10.37	0.74855	-1.67	10.09	0.00146	0.09	10.51	0.62437	-0.52	9.74	0.3131	-0.63	9.69	0.12087	-1.45	9.27	0.28849	0.2	10.53	0.6982	-0.16	10.35	0.77624	-0.44	10.21	0.41753	0.43	10.6	0.07481	0.1	10.44	1	-0.38
atoD	THC0290_0035	55526	56224	1	CDS		3-oxoacid CoA-transferase subunit A family protein AtoD	THC0290_v2_0036	atoD	-0.15	12.4	0.4309	-1.11	11.92	0.00344	-0.09	12.47	0.73918	-1.58	12.31	0.00143	-0.01	12.66	0.97576	-1.01	10.55	0.17782	-0.31	10.9	0.25295	-0.44	10.83	0.36401	-0.13	12.45	0.72527	-0.22	12.41	0.55488	-0.43	12.3	0.32583	-0.11	12.71	0.45305	-0.1	12.72	1	-0.06
	THC0290_0036	56236	59862	1	CDS		Probable type I endonuclease-methyltransferase fusion protein	THC0290_v2_0037		0.31	12.05	0.08929	-0.54	11.62	0.01754	0.31	12.12	0.19339	-0.54	11.55	0.00602	0.02	12.26	0.97442	-0.99	10.57	0.08303	-0.22	10.95	0.61473	-0.26	10.93	0.40215	-0.25	11.83	0.40849	-0.39	11.76	0.19061	-0.1	11.91	0.67801	0.25	12.23	0.14265	-0.15	12.03	1	0.04
atoA	THC0290_0037	59864	60520	1	CDS		3-oxoacid CoA-transferase subunit B family protein AtoA	THC0290_v2_0038	atoA	0.23	10.97	0.15066	-0.47	10.62	0.11667	0.14	10.95	0.3395	-0.24	10.76	0.12094	0.18	11.11	0.36607	-1.59	9.13	0.13058	-0.01	9.92	0.97383	-0.26	9.79	0.73962	-0.25	10.75	0.32316	0	10.88	0.99684	-0.13	10.81	0.54262	0.09	11.01	0.58657	-0.19	10.87	1	0.01
	THC0290_N_0033	60521	60568	1	Region	3prime	new TR			0.19	5.38	0.79493	-0.75	4.91	0.29383	0.44	5.51	0.07326	-0.54	4.32	0.0291	0.63	4.67	0.415	-0.19	3.95	0.53921	-0.2	3.95	0.48302	-0.18	3.96	0.60535	0.57	5.57	0.1132	0.96	5.77	0.04707	-0.8	4.89	0.01869	-0.19	5.14	0.56772	-0.01	5.22	1	0.74
	THC0290_N_0034	60627	61113	-1	Region	3prime	new TR			0.05	7.94	0.85089	-0.71	7.56	0.16295	0.19	7.82	0.24157	2.35	8.75	0.00166	0.26	7.95	0.31184	0.9	7.33	0.2324	-0.34	6.71	0.6071	0.43	7.09	0.78616	0.25	7.85	0.33467	0.04	7.74	0.94199	0.58	8.01	0.0355	0.45	7.81	0.01701	0.25	7.71	1	0.32
	THC0290_0038	61114	62553	-1	CDS		Probable transmembrane protein of unknown function	THC0290_v2_0039		0.6	9.33	0.01275	0.32	9.18	0.11568	0.21	9.25	0.1981	1.06	10.28	0.00148	0.15	9.57	0.415	0.68	9.46	0.09046	0.85	9.55	0.05249	0.06	9.15	0.86952	-0.03	9.13	0.91217	0.09	9.19	0.69456	0.41	9.35	0.07178	0.25	9.43	0.11082	-0.01	9.3	1	0.01
	THC0290_N_0035	62567	62668	-1	Region	3prime	new TR			0.1	7.94	0.73402	-0.61	7.58	0.13372	0.32	8.17	0.07899	1.99	9.29	0.00174	0.04	8.26	0.88876	-0.13	7.44	0.88504	1.11	8.06	0.20378	1.85	8.43	0.08267	-0.17	7.92	0.49476	-0.29	7.86	0.25868	0.08	8.05	0.63019	0.04	8.01	0.77286	-0.06	7.96	1	0.07
	THC0290_0039	62669	63382	-1	CDS		Protein of unknown function	THC0290_v2_0040		1.17	9.93	0.00411	0.32	9.5	0.0667	0.66	9.73	0.02278	0.59	10.78	0.00944	0.06	10.11	0.80451	0.51	9.6	0.18063	0.83	9.76	0.06564	1.39	10.03	0.19594	-0.06	9.37	0.84768	-0.15	9.33	0.55832	0.1	9.45	0.69072	-0.28	9.75	0.1462	0.01	9.9	1	-0.12
	THC0290_N_0036	63383	63435	-1	Region	5prime	new TR			1.42	10.04	0.02441	0.96	9.81	0.1193	0.69	9.52	0.01336	0.44	10.6	0.01801	0	10.07	0.99247	0.99	9.82	0.25763	1.72	10.19	0.11001	2.3	10.48	0.079	0.01	9.18	0.96431	-0.13	9.11	0.58455	0.26	9.3	0.1736	-0.18	9.58	0.22303	0.14	9.74	1	-0.45
ogt1	THC0290_0040	63488	63958	-1	CDS		Methylated-DNA--[protein]-cysteine S-methyltransferase	THC0290_v2_0041	ogt1	-0.39	8.23	0.08948	-0.51	8.17	0.02407	-1.03	8.1	0.03803	-1.71	8.44	0.00692	0.21	8.47	0.4488	0.77	8.31	0.09501	0.41	8.13	0.12087	0.81	8.33	0.07751	0.05	8.64	0.9167	-0.05	8.59	0.9168	-0.82	8.21	0.08911	-0.58	8.1	0.00861	0	8.38	1	0.08
	THC0290_N_0037	64013	64179	-1	Region	indep	new TR			-0.29	11.58	0.5265	-0.64	11.41	0.10461	0.7	12.07	0.01427	-0.83	11.91	0.00547	-0.6	11.32	0.05207	-0.73	12.64	0.23093	-2.54	11.74	0.04903	-1.31	12.35	0.27536	0.12	11.78	0.6009	0.14	11.79	0.54009	-0.58	11.43	0.02652	-0.74	11.36	0.00568	0.02	11.75	1	0
	THC0290_0041	64242	64637	-1	CDS		Cytochrome c551/c552 family protein	THC0290_v2_0042		-0.64	10.35	0.02604	-2.73	9.3	0.00085	0.56	10.96	0.03643	-0.78	11.03	0.06057	-0.35	10.33	0.29093	-1.1	11.55	0.1557	-3.68	10.26	0.02366	-2.62	10.79	0.06539	0.12	10.74	0.68691	0.2	10.78	0.42284	-0.62	10.37	0.05703	-0.81	10.3	0.01311	-0.1	10.66	1	0.08
	THC0290_N_0038	64654	64878	-1	Region	intra	new TR			-1	11.15	0.00429	-3.63	9.83	0.0011	-0.28	11.39	0.39186	-0.61	10.03	0.00505	-0.46	10.36	0.11501	-0.97	6.9	0.46009	-1.18	6.8	0.62613	1.52	8.14	0.43709	0.09	11.57	0.83575	0.07	11.56	0.87848	-1.01	11.02	0.07862	-0.83	10.94	0.01766	-0.07	11.33	1	0.05
hemB	THC0290_0042	64879	65871	-1	CDS		Porphobilinogen synthase	THC0290_v2_0043	hemB	-1.15	10.71	0.00542	-3.39	9.59	0.00133	-0.24	11	0.50812	-1.08	9.81	0.00137	-0.55	10.07	0.05594	-2.73	5.6	0.08303	-0.62	6.66	0.44305	-2.51	5.71	0.03738	0.2	11.22	0.6731	0.3	11.27	0.50784	-0.92	10.66	0.11908	-0.74	10.59	0.02303	-0.02	10.95	1	0.11
	THC0290_0043	65876	66910	-1	CDS		Protein of unknown function	THC0290_v2_0044		-0.98	9.75	0.00488	-2.57	8.95	0.00112	-0.44	10.24	0.04889	0.13	9.25	0.2622	-0.31	9.09	0.1781	-0.34	6.5	0.84397	0.36	6.85	0.75134	-0.34	6.5	0.71959	-0.29	10.31	0.39501	-0.38	10.27	0.15849	-0.51	10.2	0.10175	-0.35	9.95	0.03164	-0.15	10.05	1	0.07
hemF	THC0290_0044	66918	67820	-1	CDS		Coproporphyrinogen oxidase	THC0290_v2_0045	hemF	-0.57	11.39	0.02513	-1.73	10.81	0.00356	-0.27	11.6	0.12452	-0.91	11.05	0.00621	-0.2	10.7	0.44386	-0.68	9.06	0.21541	-0.22	9.29	0.28072	-0.89	8.95	0.07407	0.03	11.75	0.92354	-0.04	11.71	0.87012	-0.68	11.39	0.05416	-0.38	11.34	0.07814	-0.1	11.48	1	0.25
	THC0290_0045	67822	68385	-1	CDS		Protein of unknown function precursor	THC0290_v2_0046		-0.5	11.27	0.02296	-1.49	10.77	0.00421	-0.31	11.44	0.12504	-1.03	10.48	0.00171	-0.33	10.54	0.22405	-0.25	9.31	0.47632	0.05	9.46	0.8319	-1.12	8.88	0.44313	0.01	11.6	0.96871	-0.03	11.58	0.91499	-0.8	11.2	0.03683	-0.4	11.02	0.04162	-0.09	11.17	1	0.1
	THC0290_0046	68389	68934	-1	CDS		Probable ribosomal-protein-amino-adic N-acetyltransferase	THC0290_v2_0047		-0.78	11.32	0.01263	-2.52	10.45	0.00909	-0.01	11.73	0.94606	-1.22	10.21	0.00134	-0.33	10.4	0.15609	-0.49	8.94	0.14547	-0.02	9.18	0.94255	0.52	9.45	0.16379	0.09	11.78	0.71347	0.1	11.79	0.74131	-0.84	11.32	0.01906	-0.71	11.09	0.02925	-0.11	11.39	1	0.09
	THC0290_0047	68944	69930	-1	CDS		Hypothetical lipoprotein precursor	THC0290_v2_0048		-0.75	11.58	0.05597	-2.54	10.68	0.00092	-0.06	11.9	0.74106	-1.37	10.33	0.0011	-0.55	10.73	0.10426	-0.64	8.88	0.09641	0.37	9.38	0.12074	0.05	9.23	0.87715	0.08	11.97	0.7627	0.09	11.97	0.81914	-1	11.43	0.01407	-0.6	11.2	0.06635	0.14	11.57	1	0.09
	THC0290_N_0039	69429	69507	1	Region	indep	new TR			1.27	4.85	0.08839	3.49	5.96	0.0011	1.13	5.4	0.22872	1.24	4.75	0.01131	0.53	4.88	0.59348	0.83	8.97	0.12668	2.33	9.72	0.03562	3.64	10.38	0.04093	-0.86	4.4	0.40687	-0.63	4.52	0.52021	0.34	5.01	0.75206	-0.13	4.62	0.7771	-0.4	4.49	1	-1.78
hemE	THC0290_0048	69952	70974	-1	CDS		Uroporphyrinogen decarboxylase	THC0290_v2_0049	hemE	-0.64	11.38	0.08768	-1.78	10.81	0.00278	-0.15	11.55	0.65634	-1.49	10.14	0.0009	-0.65	10.55	0.08819	-1.71	8.32	0.08303	-1.46	8.45	0.03562	-1.02	8.66	0.12332	0.17	11.72	0.69931	0	11.63	0.99575	-0.88	11.19	0.11636	-0.36	11.15	0.22243	0.07	11.37	1	0.02
	THC0290_N_0040	70975	71053	-1	Region	intra	new TR			-0.24	10.51	0.17338	-0.98	10.14	0.00408	-0.04	10.73	0.84181	-1.34	9.25	0.00149	-0.6	9.45	0.10673	-1.18	8.14	0.12668	0.1	8.78	0.91771	-1.82	7.82	0.59282	-0.01	10.74	0.98036	-0.03	10.73	0.92853	-0.9	10.3	0.0237	-0.3	10.11	0.37282	0.22	10.37	1	-0.03
hemD	THC0290_0049	71054	71716	-1	CDS		Uroporphyrinogen-III synthase	THC0290_v2_0050	hemD	-0.13	11.15	0.39625	-1.27	10.58	0.00373	-0.08	11.4	0.56732	-1.32	9.34	0.00562	-0.7	9.91	0.05329	-0.84	8.77	0.21579	-0.75	8.82	0.04258	-0.76	8.81	0.13029	-0.29	11.3	0.29007	-0.35	11.27	0.1938	-1.02	10.93	0.02107	-0.58	10.53	0.0771	-0.03	10.81	1	-0.04
hemC	THC0290_0050	71716	72642	-1	CDS		Hydroxymethylbilane synthase	THC0290_v2_0051	hemC	-0.1	10.98	0.46939	-0.12	10.97	0.38657	-0.16	11.07	0.50382	-2.5	9.03	0.00141	-0.6	9.79	0.05594	-0.02	9.7	0.95527	0.03	9.72	0.89536	0.07	9.74	0.83442	-0.11	11.09	0.74663	-0.26	11.02	0.42394	-1.03	10.63	0.03569	-0.54	10.44	0.04315	-0.02	10.7	1	-0.07
	THC0290_N_0041	72643	72710	-1	Region	intra	new TR			0.41	10.52	0.21582	0.62	10.63	0.04865	-0.05	10.45	0.86118	-3.94	7.69	0.00107	-0.39	9.19	0.21843	-0.11	9.9	0.70285	0.01	9.96	0.983	-1.08	9.42	0.3271	-0.21	10.38	0.58557	-0.34	10.31	0.34706	-0.62	10.17	0.12088	-0.14	9.85	0.60539	0.03	9.94	1	-0.24
hemA	THC0290_0051	72711	73952	-1	CDS		Glutamyl-tRNA reductase	THC0290_v2_0052	hemA	0.5	11.91	0.02313	1.21	12.26	0.00247	0.18	11.85	0.26965	-2.1	9.61	0.00056	-0.47	10.74	0.15787	0.12	11.8	0.62841	-0.2	11.64	0.30711	-0.01	11.74	0.98015	-0.29	11.61	0.27683	-0.47	11.52	0.12737	-0.62	11.44	0.02466	-0.01	11.29	0.96614	-0.03	11.28	1	0.07
	THC0290_N_0042	74099	74180	1	Region	5prime	new TR			1.37	8.99	0.12066	2.39	9.5	0.02314	0.01	8.25	0.96519	-1.42	6.77	0.03231	-0.01	7.67	0.97638	1.39	10.86	0.08417	1.36	10.85	0.17562	2.12	11.22	0.12346	-0.19	8.15	0.54861	-0.09	8.2	0.7793	0.01	8.25	0.97531	0.62	8.22	0.01604	0.03	7.93	1	-0.66
	THC0290_0052	74181	75047	1	CDS		Probable transcriptional regulator, AraC family	THC0290_v2_0053		0.22	10.04	0.2488	1.48	10.67	0.00214	-0.13	9.86	0.35723	-0.04	9.57	0.73835	-0.09	9.01	0.72617	0.14	11.3	0.69166	0	11.23	1	0.31	11.39	0.37823	-0.02	9.92	0.9446	-0.19	9.83	0.42622	-0.07	9.9	0.66228	0.57	9.78	0.01595	-0.13	9.43	1	0.07
hemH	THC0290_0053	75051	76070	1	CDS		Ferrochelatase	THC0290_v2_0054	hemH	0.66	11.31	0.01564	1.08	11.52	0.00668	-0.03	10.81	0.94457	-0.47	11.1	0.09056	-0.25	10.32	0.36672	-0.31	11.34	0.23838	-0.41	11.29	0.10848	-0.33	11.33	0.27536	0.25	10.95	0.56622	0.18	10.91	0.66581	0.14	10.89	0.72832	0.04	10.74	0.86154	0	10.72	1	0
	THC0290_0054	76103	76645	1	CDS		Protoporphyrinogen IX oxidase	THC0290_v2_0055	hemJ	0.78	11.23	0.01328	0.38	11.02	0.16396	0.04	10.74	0.86802	-0.54	10.94	0.00779	-0.38	10.15	0.19318	-0.8	10.66	0.08385	-0.83	10.64	0.04663	-1.1	10.51	0.08767	-0.04	10.7	0.90281	-0.07	10.68	0.82537	0.04	10.73	0.89954	0.07	10.43	0.80486	0.13	10.45	1	0.01
	THC0290_0055	76646	78121	1	CDS		Two-component system sensor histidine kinase	THC0290_v2_0056		0.55	10.49	0.04857	-0.15	10.14	0.45828	0.07	10.06	0.80336	-0.04	10.07	0.75925	-0.3	9.43	0.1781	-0.82	9.81	0.09732	-0.41	10.02	0.11001	-0.33	10.06	0.35702	-0.16	9.95	0.65044	-0.25	9.9	0.42838	0.37	10.21	0.2098	-0.06	9.87	0.80647	0.07	9.93	1	0.05
crt	THC0290_0056	78125	78907	1	CDS		Probable 3-hydroxybutyryl-CoA dehydratase	THC0290_v2_0057	crt	0.79	11.4	0.00776	0.83	11.41	0.01846	-0.01	11	0.96252	-1.27	11.19	0.00166	-0.12	10.78	0.53229	-1.02	10.72	0.08783	-0.4	11.03	0.20583	-0.05	11.21	0.90543	0.02	11.02	0.95049	0.03	11.02	0.92125	-0.13	10.94	0.4139	0.15	11.03	0.30409	0	10.96	1	0.01
	THC0290_N_0043	78654	78915	-1	Region	3prime	new TR			0.55	5.12	0.35934	1.98	5.84	0.00295	0.07	4.8	0.87064	3.08	6.82	0.00061	0.09	4.59	0.86672	0.19	6.41	0.81698	0.18	6.4	0.80132	-0.52	6.05	0.81695	-0.37	4.58	0.28938	0.01	4.77	0.99208	0.16	4.85	0.626	-0.21	4.73	0.60248	-0.22	4.73	1	-0.22
	THC0290_N_0044	78908	78989	1	Region	3prime	new TR			0.99	6.41	0.02002	0.87	6.35	0.12526	-0.14	5.59	0.50013	-0.17	6.47	0.37503	-0.09	5.57	0.8391	-0.26	5.59	0.90381	-1.83	4.8	0.02834	0.57	6	0.83616	-0.45	5.44	0.25996	-0.07	5.63	0.89751	-0.23	5.54	0.36163	-0.36	5.58	0.06094	-0.41	5.56	1	-0.57
	THC0290_0057	78916	79563	-1	CDS		Probable hydrolase	THC0290_v2_0058		-0.61	8.41	0.01952	0.56	8.99	0.0207	-0.27	8.49	0.1774	1.32	9.11	0.00391	-0.01	8.39	0.96465	-0.07	9.96	0.80353	-0.73	9.64	0.07127	-1.98	9.01	0.03738	0.13	8.69	0.74823	0.37	8.81	0.15131	0.31	8.78	0.17442	-0.66	8.62	0.01453	0.05	8.97	1	0.08
	THC0290_N_0045	78990	79546	1	Region	3prime-PT	new TR			1	7.76	0.01268	0.52	7.52	0.05583	0.09	7.35	0.62287	-0.37	7.95	0.09043	-0.23	7	0.41172	-2.27	6.34	0.22336	-1.93	6.52	0.28737	-2.7	6.13	0.09487	-0.45	7.07	0.13292	-0.23	7.19	0.351	-0.21	7.2	0.21458	-0.08	7.11	0.62674	0.08	7.19	1	-0.05
	THC0290_N_0046	79564	79634	-1	Region	intra	new TR			-0.66	8.02	0.01383	0.48	8.59	0.05397	0	8.15	0.99307	1.04	8.19	0.00257	0.02	8.02	0.94805	-0.2	9.63	0.46886	-0.69	9.38	0.08868	-1.8	8.82	0.14078	0.34	8.32	0.33467	0.45	8.38	0.14683	0.43	8.37	0.11312	-0.43	8.29	0.06107	0.08	8.55	1	0.26
	THC0290_0058	79635	80624	-1	CDS		Putative acyl-[acyl-carrier-protein] desaturase	THC0290_v2_0059		0.23	11.74	0.15211	0.59	11.92	0.01433	0.32	11.74	0.09876	-0.68	11.11	0.00445	-0.2	11.43	0.34205	-0.12	12.05	0.60472	-0.12	12.05	0.54358	-0.63	11.8	0.11578	0.26	11.71	0.36463	0.34	11.75	0.18065	0.09	11.62	0.62732	0.15	12.01	0.24582	-0.03	11.92	1	0.06
plsC	THC0290_0059	80660	81394	-1	CDS		1-acylglycerol-3-phosphate O-acyltransferase	THC0290_v2_0060	plsC	0.8	11.43	0.00748	1.91	11.99	0.00175	0.95	11.14	0.02371	-1.97	10.37	0.00143	-0.57	10.73	0.06107	-0.24	12.48	0.29942	-0.3	12.45	0.16588	-0.58	12.3	0.12402	0.49	10.91	0.33715	0.79	11.06	0.07866	0.49	10.91	0.15193	0.9	12.04	0.01019	0.03	11.6	1	-0.01
	THC0290_N_0047	81395	81474	-1	Region	3prime	new TR			0.73	7.21	0.01877	2.24	7.96	0.00125	1.23	7.16	0.10884	-2.99	5.35	0.00255	-0.91	6.6	0.05077	0.12	9.67	0.62966	-1.07	9.08	0.10854	-1.91	8.66	0.3076	0.86	6.97	0.30488	1.16	7.12	0.15131	0.77	6.93	0.27086	1.46	8.33	0.0042	0.06	7.63	1	0.29
yqiW	THC0290_0060	81475	81885	-1	CDS		Protein of unknown function YqiW	THC0290_v2_0061	yqiW	0.67	12.48	0.06133	1.56	12.93	0.00989	0.16	12.51	0.48004	-0.12	12.37	0.5109	-0.14	12.18	0.48988	1.27	14.78	0.09693	1.15	14.72	0.03717	1.03	14.66	0.07407	0.16	12.51	0.61989	0.27	12.56	0.44814	0.24	12.55	0.43845	0.66	12.59	0.01645	0	12.26	1	-0.17
	THC0290_N_0048	81912	82047	-1	Region	intra	new TR			-0.76	9.89	0.01204	-0.61	9.97	0.02058	-0.24	10.2	0.15636	1.05	9.95	0.0013	0.09	9.75	0.72252	-0.42	8.83	0.17647	-1.31	8.38	0.15397	-1.14	8.47	0.28842	-0.19	10.22	0.41568	-0.02	10.31	0.9528	-0.36	10.14	0.09668	0.5	10.24	0.05811	0.01	9.99	1	0.09
	THC0290_0061	82048	82737	-1	CDS		Hydrolase, haloacid dehalogenase family protein	THC0290_v2_0062		-0.33	11.02	0.06739	-0.73	10.82	0.01883	-0.06	11.18	0.64185	0.31	11.05	0.02947	0	10.92	0.9907	-0.41	9.78	0.20167	-0.54	9.72	0.11905	-0.39	9.79	0.22225	-0.12	11.15	0.60762	0.04	11.23	0.86423	-0.4	11.01	0.06106	0.42	11.31	0.03972	-0.05	11.08	1	0.12
	THC0290_N_0049	82738	82791	-1	Region	intra	new TR			-0.21	8.05	0.35534	0.14	8.23	0.51559	0	8.24	0.99814	-0.88	7.05	0.17848	-0.01	7.93	0.9737	-1.2	6.89	0.08303	-1.95	6.51	0.32474	-2.33	6.32	0.17203	0.15	8.31	0.59414	0.22	8.35	0.34082	-0.08	8.2	0.69453	0.63	8.51	0.01127	0.02	8.2	1	0.18
metG	THC0290_0062	82792	84852	-1	CDS		Methionine--tRNA ligase	THC0290_v2_0063	metG	-0.45	11.66	0.02749	-0.46	11.66	0.04807	-0.13	11.77	0.39058	-0.29	11.52	0.08026	0.01	11.65	0.97109	-0.43	10.52	0.14547	-0.4	10.53	0.11033	-0.13	10.67	0.63367	0.06	11.87	0.82962	-0.06	11.81	0.80797	-0.57	11.56	0.03579	0.57	12.02	0.02187	0.13	11.81	1	-0.01
	THC0290_0063	85173	85406	1	CDS		Hypothetical protein	THC0290_v2_0064		1.12	12.45	0.05821	1.29	12.53	0.02956	0.3	12.18	0.23624	0.14	11.91	0.30369	-0.09	12.11	0.64167	1.49	13.49	0.08318	2.4	13.94	0.03952	2.23	13.86	0.03973	-0.54	11.76	0.14833	-0.72	11.67	0.10164	0.18	12.12	0.50451	0.13	11.96	0.44092	0.18	11.99	1	-0.53
	THC0290_0064	85412	86431	1	CDS		Probable transmembrane protein of unknown function	THC0290_v2_0065		0	11.55	0.9891	-0.57	11.26	0.01566	0.41	11.85	0.17264	1.49	11.16	0.0013	-0.02	11.3	0.92882	0.63	11.7	0.23972	0.22	11.49	0.29454	0.41	11.59	0.30003	-1.19	11.06	0.06547	-1.24	11.03	0.04615	0.39	11.84	0.23526	-0.25	11.38	0.06512	0.02	11.52	1	-0.28
	THC0290_0065	86458	87414	1	CDS		Putative carboxypeptidase	THC0290_v2_0066		-0.24	9.92	0.3091	-1.54	9.26	0.00371	0.02	10.04	0.92336	1.56	10.02	0.00075	-0.06	10.01	0.82134	0.51	9.02	0.14994	0.75	9.13	0.04179	1.22	9.37	0.07951	-0.7	9.68	0.06693	-0.57	9.75	0.08446	0.24	10.15	0.17972	-0.59	9.94	0.01479	-0.1	10.18	1	0.05
	THC0290_N_0050	87415	87513	1	Region	intra	new TR			0.5	7.65	0.16473	0.24	7.52	0.17285	0.67	7.55	0.10184	2.45	7.34	0.00053	0.3	7.64	0.25423	0.6	7.73	0.26512	-1.61	6.62	0.45625	0.68	7.77	0.47374	-0.49	6.97	0.25226	-0.52	6.96	0.2816	1.24	7.84	0.02235	0.23	7.6	0.41336	0.16	7.57	1	0.49
	THC0290_0066	87514	87873	1	CDS		Protein of unknown function	THC0290_v2_0067		0.08	8.55	0.55731	-1.47	7.78	0.00434	0.07	8.52	0.72728	2.25	8.47	0.00054	-0.1	8.27	0.64552	0.68	7.43	0.22438	-2.81	5.68	0.03606	0.7	7.44	0.40521	-0.75	8.11	0.08211	-0.6	8.19	0.09439	0.13	8.55	0.55963	-0.61	8.23	0.05275	-0.01	8.52	1	0.02
	THC0290_N_0051	87874	88509	1	Region	3prime	new TR			-0.09	7.82	0.55705	-0.88	7.42	0.00812	0.16	7.95	0.31726	2.85	8.15	0.00056	-0.09	7.55	0.70318	0.14	6.01	0.78905	-1.41	5.24	0.12241	-1.83	5.03	0.0478	-0.5	7.62	0.13747	-0.75	7.5	0.05609	0.15	7.94	0.64137	0.06	7.69	0.74072	0.27	7.79	1	-0.2
tas	THC0290_0067	87874	88914	-1	CDS		Oxidoreductase Tas, aldo/keto reductase family	THC0290_v2_0068	tas	-0.64	9.22	0.02724	-0.28	9.4	0.1848	-0.51	9.38	0.02953	-1.35	9.26	0.00536	0.14	9.38	0.47299	-0.03	9.2	0.93807	-0.84	8.79	0.04163	-2.04	8.19	0.07465	0.25	9.76	0.3273	0.29	9.78	0.23035	0.56	9.91	0.03672	-0.54	8.97	0.02002	-0.01	9.23	1	0.07
	THC0290_0068	89048	90010	-1	CDS		Flagellar motor/Chemotaxis (MotB)-related lipoprotein precursor	THC0290_v2_0069		-0.23	13	0.4405	-0.95	12.64	0.00799	-0.38	12.86	0.04998	-1.65	12.47	0.00168	0.24	13.25	0.27093	-0.49	11.98	0.28711	-0.3	12.08	0.24816	-0.2	12.13	0.51005	-0.04	13.04	0.89687	0.06	13.09	0.80696	0.69	13.4	0.02959	-0.44	12.93	0.04377	-0.08	13.11	1	0.08
	THC0290_N_0053	90011	90080	-1	Region	intra	new TR			-0.32	13.29	0.08451	-0.54	13.18	0.02909	-0.2	13.36	0.23255	-1.81	12.75	0.00066	0.15	13.85	0.61752	0.04	12.61	0.94893	-0.13	12.53	0.62227	0.61	12.89	0.32343	0.02	13.47	0.95554	-0.19	13.36	0.44761	0.06	13.49	0.83163	-0.37	13.43	0.06325	-0.01	13.61	1	0.2
xth	THC0290_0069	90081	90842	-1	CDS		Exodeoxyribonuclease III	THC0290_v2_0070	xth	-0.45	11.81	0.03355	-1.02	11.53	0.00305	-0.29	11.77	0.29645	-1.51	11.4	0.0008	0.12	12.29	0.58727	0.68	10.47	0.10192	0.61	10.44	0.06877	0.74	10.5	0.08448	0.24	12.03	0.54632	-0.1	11.86	0.79693	-0.52	11.65	0.15361	-0.3	11.91	0.10322	0.09	12.1	1	0.03
	THC0290_0070	91039	92844	1	CDS		Putative hemolysin	THC0290_v2_0071		-0.61	11.8	0.05872	-1.02	11.6	0.00461	-0.47	11.9	0.05948	0.99	11.62	0.00222	0.38	11.85	0.13038	-0.1	11.34	0.6371	-0.51	11.14	0.0776	-0.78	11	0.07617	-0.13	12.07	0.63428	-0.01	12.13	0.97346	0.04	12.15	0.88269	-0.05	11.74	0.6476	0.02	11.77	1	-0.04
	THC0290_0071	93117	94103	-1	CDS		Putative phosphoglycerate dehydrogenase	THC0290_v2_0072		0.7	11.37	0.01262	0.31	11.18	0.08319	0.15	10.92	0.57771	-0.51	11.55	0.02675	0.18	11.65	0.45989	0.93	11.25	0.09382	1.31	11.44	0.03228	1.34	11.45	0.06686	0.07	10.88	0.86254	-0.02	10.84	0.97346	0.07	10.88	0.84608	0.13	11.25	0.51488	0.02	11.2	1	-0.04
	THC0290_N_0056	94104	94163	-1	Region	5prime	new TR			0.06	10.02	0.91023	0.45	10.21	0.40183	-0.42	9.61	0.17768	0.18	10.42	0.43968	0.03	10	0.95923	1.46	10.14	0.13473	2.37	10.59	0.04078	2.94	10.88	0.03738	0.2	9.92	0.57762	0.03	9.83	0.95289	-0.3	9.67	0.39402	-0.01	9.74	0.93404	0.24	9.87	1	-0.39
	THC0290_N_0057	94165	94365	-1	Region	3prime	new TR			0.27	8.84	0.53979	-1.57	7.91	0.00164	-0.1	8.5	0.77592	0.31	9.4	0.09612	0.06	8.48	0.93261	-0.99	6.12	0.11486	-0.61	6.31	0.606	-1.24	6	0.49056	0.34	8.71	0.46933	0.4	8.74	0.4216	0.08	8.59	0.82067	0.08	8.64	0.55832	0.14	8.67	1	-0.41
proC	THC0290_0072	94366	95142	-1	CDS		Pyrroline-5-carboxylate reductase	THC0290_v2_0073	proC	-0.23	12.22	0.35456	-1.4	11.63	0.00183	-0.31	12.13	0.58412	-1.19	12.19	0.00198	-0.15	12.61	0.79614	-0.36	10.08	0.47183	0.03	10.28	0.92643	-0.12	10.2	0.73427	0.19	12.38	0.76666	0.28	12.42	0.6815	-0.3	12.13	0.6914	-0.32	12.76	0.07208	-0.04	12.89	1	-0.18
mgtE	THC0290_0073	95153	96502	-1	CDS		Mg2+ transporter MgtE	THC0290_v2_0074	mgtE	-0.41	12.14	0.0364	-1.17	11.76	0.00226	-0.06	12.11	0.88072	-0.7	11.86	0.00438	-0.08	12.52	0.70669	-0.02	10.83	0.96577	-0.1	10.79	0.70569	-0.63	10.52	0.09685	0.34	12.3	0.36216	0.5	12.38	0.20249	-0.04	12.11	0.93849	-0.22	12.58	0.09678	-0.06	12.66	1	-0.11
ksgA	THC0290_0074	96492	97271	-1	CDS		Dimethyladenosine transferase	THC0290_v2_0075	ksgA	-0.38	11.75	0.04844	-1.9	10.99	0.00119	0.39	11.6	0.30861	-0.74	11.72	0.00343	0.01	12.17	0.97576	-0.15	10.48	0.64134	-0.5	10.31	0.09987	-0.99	10.06	0.05653	0.85	11.83	0.1245	1.08	11.95	0.06189	0.43	11.63	0.27404	-0.33	12.14	0.04393	0.07	12.34	1	0.07
	THC0290_N_0058	97272	97344	-1	Region	intra	new TR			-0.34	10.91	0.40408	-1.54	10.32	0.00263	0.58	11.2	0.06717	-1	10.51	0.00336	-0.22	11.76	0.5229	-0.48	10.13	0.14615	-0.73	10.01	0.19853	-2.51	9.12	0.09661	0.66	11.24	0.18181	0.89	11.35	0.0644	0.19	11	0.45936	-0.48	11.5	0.08581	0.03	11.75	1	0.36
	THC0290_0075	97345	97656	-1	CDS		Protein of unknown function	THC0290_v2_0076		-0.55	11.26	0.04645	-1.43	10.82	0.00538	0.37	11.26	0.25207	-0.69	10.99	0.00806	0	11.71	0.98932	0.2	10.73	0.5402	0.15	10.7	0.71726	0.22	10.74	0.51288	0.59	11.37	0.1703	0.77	11.46	0.08442	0.18	11.17	0.51698	-0.49	11.62	0.02022	0.03	11.88	1	-0.02
	THC0290_N_0059	97657	97728	-1	Region	intra	new TR			0.45	6.92	0.15226	-0.15	6.61	0.7799	0.46	7.05	0.0745	-1.8	5.88	0.04159	0.21	7.32	0.31259	-1.04	6.05	0.62966	0.06	6.6	0.96659	-1.36	5.89	0.41561	0.16	6.9	0.56442	0.45	7.04	0.27344	0.37	7	0.27792	-0.17	7.56	0.20458	-0.21	7.54	1	0.21
	THC0290_0076	97729	99507	-1	CDS		Tetratricopeptide repeat domain protein precursor	THC0290_v2_0077		-0.3	10.15	0.10295	-0.87	9.87	0.00883	0.29	10.35	0.24612	0.63	10.57	0.00644	0.18	10.53	0.39326	0.03	10.32	0.90538	-0.29	10.16	0.30774	-0.81	9.9	0.20674	-0.1	10.15	0.66668	0.09	10.25	0.85259	0.65	10.53	0.0843	-0.8	10.41	0.00628	-0.14	10.74	1	0.13
	THC0290_N_0060	99508	99741	-1	Region	intra	new TR			-0.33	11.92	0.09594	-1.56	11.31	0.0027	0.53	12.25	0.07237	-0.28	11.51	0.07326	0	12.34	0.99247	0.07	11.16	0.74073	-0.15	11.05	0.66957	0.09	11.17	0.72015	0.14	12.06	0.65589	0.34	12.16	0.27593	0.42	12.2	0.15403	-0.99	11.96	0.00609	-0.02	12.45	1	0.08
serS	THC0290_0077	99742	101013	-1	CDS		Serine--tRNA ligase	THC0290_v2_0078	serS	0.48	13.61	0.03578	-0.12	13.31	0.46475	0.51	13.26	0.14457	0.02	13.53	0.83584	-0.14	13.86	0.52699	-0.93	12.28	0.11368	-1.22	12.14	0.03498	-1.07	12.21	0.07882	0.35	13.18	0.46507	0.5	13.25	0.21738	0.6	13.31	0.11969	-0.38	13.6	0.03038	0.02	13.8	1	-0.09
	THC0290_N_0061	101014	101224	-1	Region	intra	new TR			0.21	13.37	0.16497	-0.69	12.92	0.00951	0.61	12.92	0.12913	-0.68	12.93	0.00428	0	13.61	0.99247	-0.78	12.07	0.09589	-1.18	11.87	0.04138	-1.13	11.89	0.12347	0.41	12.83	0.39095	0.74	12.99	0.09319	0.63	12.93	0.11004	-0.73	13.19	0.00756	0.03	13.57	1	-0.06
	THC0290_0078	101225	102457	-1	CDS		Protein of unknown function precursor	THC0290_v2_0079		0.67	13.95	0.0246	0.12	13.67	0.58187	0.83	13.27	0.18184	-0.49	13.75	0.00883	0.02	14.2	0.92106	-0.86	12.71	0.10802	-1.1	12.59	0.03343	-1.17	12.55	0.07069	0.93	13.32	0.26101	1.17	13.44	0.10962	1.02	13.36	0.16501	-0.73	13.88	0.0075	0.14	14.31	1	-0.07
	THC0290_0079	102454	102894	-1	CDS		Protein of unknown function	THC0290_v2_0080		0.61	14.33	0.03808	0.2	14.13	0.34334	0.71	13.65	0.16958	-0.38	14.07	0.02014	-0.16	14.45	0.39745	-0.67	13.31	0.09143	-1.23	13.03	0.02963	-1.07	13.11	0.0489	0.93	13.76	0.17388	1.23	13.91	0.08002	0.97	13.78	0.11312	-0.65	14.36	0.0075	-0.09	14.64	1	-0.05
	THC0290_0080	102896	104074	-1	CDS		Probable lipoprotein precursor	THC0290_v2_0081		0.81	14.38	0.0267	0.59	14.27	0.03599	0.69	13.51	0.24778	-0.42	13.98	0.013	-0.22	14.44	0.29462	-0.5	13.48	0.15139	-1.26	13.1	0.02963	-1.14	13.16	0.04683	0.86	13.6	0.29083	1.15	13.74	0.12029	0.93	13.63	0.18771	-0.65	14.22	0.02343	0.06	14.57	1	-0.03
mntH	THC0290_0081	104165	106036	1	CDS		Probable manganese transport protein mntH	THC0290_v2_0082	mntH	1.37	12.52	0.00318	1.8	12.73	0.00432	0.94	11.98	0.01315	1.02	13.2	0.00175	-0.07	12.57	0.75624	-0.81	12.68	0.09088	-1.15	12.51	0.04258	-0.35	12.91	0.3262	0.51	11.76	0.15656	0.57	11.79	0.06479	1.01	12.01	0.01179	0.52	12.62	0.01116	0.04	12.39	1	-0.04
	THC0290_N_0062	106037	106329	1	Region	intra	new TR			1.51	11.8	0.00629	0.96	11.52	0.01797	0.44	11.33	0.08752	1.03	12.37	0.00698	-0.05	11.87	0.81982	-0.1	11.92	0.8635	-0.42	11.76	0.22202	0.46	12.2	0.2594	0.18	11.19	0.53451	0.5	11.35	0.10356	0.5	11.36	0.0759	0	11.71	1	0	11.71	1	-0.24
sirR	THC0290_0082	106330	106983	1	CDS		Probable metal-dependent transcriptional regulator	THC0290_v2_0083	sirR	1.18	11.68	0.00819	0.34	11.26	0.14686	0.31	11.1	0.19392	1.2	12.06	0.01637	0.21	11.84	0.29138	-0.9	11.24	0.08417	-0.87	11.26	0.06465	-1.02	11.18	0.12556	0.2	11.05	0.50806	0.7	11.3	0.06863	0.75	11.33	0.05599	-0.21	11.62	0.27424	-0.11	11.67	1	0.04
	THC0290_N_0063	106984	108354	1	Region	repeated_region	new TR			0.96	10.03	0.0049	-0.53	9.28	0.02904	-0.13	9.13	0.55483	2.45	11.75	0.00053	0.04	10.4	0.85155	-0.62	9.57	0.10215	0.16	9.96	0.41248	0.14	9.95	0.60704	0.5	9.44	0.1359	0.54	9.46	0.09193	1.06	9.72	0.01747	-0.29	9.8	0.06722	-0.01	9.94	1	0.17
	THC0290_0083	107603	108094	-1	CDS		Protein of unknown function precursor	THC0290_v2_0084		-0.48	8.48	0.06227	0.16	8.79	0.27816	-0.91	8.32	0.09526	-3.23	8.13	0.00114	-0.05	8.63	0.84816	1.08	9.22	0.13393	1.07	9.21	0.12087	0.49	8.92	0.38654	0	8.77	0.99675	-0.39	8.58	0.5001	-0.97	8.29	0.19831	-0.45	8.61	0.19577	-0.02	8.83	1	-0.28
	THC0290_0084	108355	108948	1	CDS		Protein of unknown function	THC0290_v2_0085		0.78	9.66	0.03652	-0.5	9.01	0.02815	-0.11	8.89	0.46288	2.68	11.61	0.00055	0.14	10.25	0.52426	-1	9.34	0.1044	-0.85	9.41	0.14083	-0.18	9.75	0.54333	0.65	9.27	0.06996	0.69	9.29	0.04707	1.04	9.46	0.01254	0.05	9.44	0.74465	0.09	9.45	1	0.15
	THC0290_N_0064	108949	109046	1	Region	3prime	new TR			1.95	11	0.00953	0.82	10.43	0.00591	0.32	9.86	0.09313	2.68	12.98	0.00055	-0.04	11.25	0.92862	0.3	11.47	0.30894	0.83	11.73	0.17558	1.35	11.99	0.09851	0.69	10.04	0.07026	1.09	10.24	0.03187	1.25	10.32	0.01673	0.19	10.3	0.41442	0.12	10.26	1	-0.42
	THC0290_tRNA_0002	109057	109130	-1	tRNA		transfer RNA-Asn			2.08	10.18	0.10638	4.51	11.4	0.00506	0.15	9.48	0.31157	-0.69	9.73	0.05894	-0.01	9.89	0.98894	1.78	13.06	0.15435	2.71	13.52	0.0446	3.29	13.81	0.0414	-0.32	9.25	0.25858	0.15	9.48	0.60465	0	9.41	0.99352	-0.12	10.31	0.76419	0.02	10.38	1	-1.11
	THC0290_N_0066	109131	109277	-1	Region	5prime	new TR			0.2	9.25	0.38698	0.9	9.6	0.0086	-0.22	9.22	0.23448	-0.19	8.99	0.23868	-0.11	9.17	0.68867	0.82	10.36	0.08621	0.01	9.95	0.98559	-0.5	9.7	0.60083	0.18	9.43	0.47169	0.27	9.47	0.33018	1.3	9.98	0.01173	-0.33	9.06	0.06905	0.05	9.25	1	-0.09
	THC0290_0085	109278	110612	-1	CDS		Probable M50 family membrane-associated zinc metalloprotease	THC0290_v2_0086		-0.26	11.4	0.09252	-0.53	11.26	0.05295	-0.25	11.4	0.19821	-0.33	11.33	0.08125	-0.05	11.45	0.81483	0.31	11.72	0.23821	-0.15	11.49	0.47915	-0.06	11.54	0.82896	0.29	11.66	0.29349	0.07	11.56	0.80981	1.08	12.06	0.015	-0.6	11.12	0.01782	0.06	11.45	1	0.03
	THC0290_N_0067	110638	110698	-1	Region	intra	new TR			-0.64	6.45	0.01198	-0.57	6.48	0.02734	0.45	6.66	0.17398	-0.31	6.48	0.35078	-0.42	6.76	0.12068	-0.55	5.52	0.7765	-1.94	4.82	0.0776	-1.94	4.82	0.08919	0.41	6.64	0.28584	0.46	6.66	0.2911	-0.42	6.22	0.21486	-1.14	6.71	0.0084	-0.08	7.24	1	-0.04
	THC0290_0086	110699	112627	-1	CDS		Probable M1 family metalloprotease precursor	THC0290_v2_0087		0.76	10.75	0.04457	1.18	10.96	0.00261	0.5	10.54	0.26938	-1.15	11.22	0.00252	-0.29	11.12	0.21549	0.43	11.25	0.17455	-0.01	11.03	0.96018	0.03	11.05	0.96621	0.04	10.31	0.95049	-0.15	10.22	0.80522	-0.13	10.22	0.78549	-0.29	10.91	0.06446	0.05	11.08	1	-0.14
	THC0290_0087	112762	113097	-1	CDS		Probable single-stranded DNA-binding protein	THC0290_v2_0088		0.7	7.92	0.18865	2.61	8.88	0.00088	-1.04	7.07	0.03038	-1.24	8.5	0.02668	0.48	8.18	0.07591	1.23	10.29	0.09143	0.44	9.89	0.28643	1.01	10.18	0.15904	-0.7	7.25	0.13891	-0.66	7.26	0.14515	-0.96	7.12	0.05622	1.12	8.42	0.02941	0.12	7.92	1	-0.04
	THC0290_N_0068	113267	113949	1	Region	indep	new TR			-0.41	8.18	0.0349	0.65	8.71	0.01147	-0.15	8.2	0.37282	2.2	8.88	0.00096	0.1	8.31	0.56003	0.66	9.32	0.0963	1.45	9.72	0.02931	1.67	9.83	0.05116	0.04	8.3	0.9063	-0.11	8.23	0.68056	0.17	8.36	0.39551	0.22	8.36	0.15232	0.15	8.33	1	-0.14
	THC0290_0088	113950	114297	1	CDS		Protein of unknown function	THC0290_v2_0089		-0.36	8.79	0.06932	0.7	9.32	0.01467	-0.12	8.79	0.46565	1.58	9.81	0.00271	0.28	8.92	0.2065	0.54	9.83	0.17801	0.83	9.98	0.1089	1.71	10.42	0.05983	-0.08	8.81	0.78304	-0.12	8.79	0.62041	0.23	8.97	0.23907	0.12	8.91	0.57176	0.05	8.88	1	-0.05
yeeZ	THC0290_0089	114298	115119	1	CDS		Putative enzyme of sugar metabolism YeeZ precursor	THC0290_v2_0090	yeeZ	-0.38	8.89	0.2531	0.41	9.28	0.10888	-0.28	8.87	0.14593	1.66	9.71	0.00141	0.2	8.92	0.44097	-0.19	9.59	0.76927	-0.47	9.45	0.19626	0.07	9.72	0.78818	0.02	9.02	0.94559	-0.19	8.91	0.40222	0.39	9.2	0.0763	0.09	8.92	0.60047	0	8.87	1	-0.05
	THC0290_N_0070	115149	115324	1	Region	3prime	new TR			0.82	5.17	0.29631	2.69	6.11	0.00197	0.46	4.98	0.40268	0.92	5.36	0.33023	-0.19	4.75	0.68984	0.59	5	0.63047	2.16	5.79	0.03945	0.91	5.17	0.42227	-0.04	4.73	0.95555	0.15	4.83	0.83934	-0.17	4.67	0.79789	0.45	5.38	0.03641	-0.26	5.02	1	-0.42
pepO	THC0290_0090	115174	117234	-1	CDS		M13 family metallopeptidase PepO precursor	THC0290_v2_0091	pepO	-0.68	12.33	0.00883	-2.24	11.55	0.00123	-0.5	12.18	0.15662	-1.2	11.54	0.00103	0.38	13.24	0.17684	-0.87	10.29	0.09088	-0.41	10.52	0.15354	-0.41	10.52	0.38652	0.57	12.71	0.20122	0.64	12.74	0.16202	0.62	12.74	0.18455	-0.7	12.56	0.00747	-0.06	12.88	1	0.1
	THC0290_0091	117237	120656	-1	CDS		Probable glycoside hydrolase precursor	THC0290_v2_0092		-0.23	9.84	0.26724	-0.23	9.84	0.14094	-0.31	9.62	0.14042	-0.13	10.03	0.27332	0.35	10.5	0.15905	-0.28	9.82	0.24328	-0.43	9.74	0.13582	-0.99	9.46	0.05393	-0.08	9.74	0.79311	-0.16	9.7	0.56486	0.77	10.16	0.03212	-0.56	10.13	0.0124	-0.01	10.41	1	0.06
	THC0290_0092	120728	121453	1	CDS		Probable cytochrome c oxidase biogenesis protein	THC0290_v2_0093		0.48	9.21	0.05696	1.33	9.64	0.00216	0.22	9.12	0.16198	0.91	9.02	0.00262	0.06	8.71	0.71954	0.17	10.13	0.45788	-0.02	10.03	0.92539	-0.08	10	0.75223	-0.18	8.92	0.45774	-0.09	8.96	0.73742	0.46	9.24	0.05589	0.83	9.14	0.01181	0.06	8.75	1	-0.02
feoA	THC0290_0093	121549	121791	1	CDS		Ferrous iron transport protein A	THC0290_v2_0094	feoA	1.41	11.15	0.00422	2.29	11.59	0.00187	0.46	10.91	0.07107	1.57	11.07	0.00196	0.25	11.1	0.27698	0.7	12.39	0.09046	1.37	12.72	0.04555	1.23	12.65	0.04325	-0.45	10.46	0.1823	-0.41	10.48	0.18916	0.11	10.74	0.61899	0.64	11.43	0.03334	-0.15	11.04	1	-0.16
feoB	THC0290_0094	121791	123884	1	CDS		Ferrous iron transport protein B	THC0290_v2_0095	feoB	1.22	10.14	0.0036	1.66	10.36	0.00259	0.49	9.89	0.05588	2.25	10.03	0.0008	0.26	10.25	0.22405	-0.34	10.78	0.2324	-0.43	10.73	0.14945	-2.06	9.91	0.12229	-0.5	9.4	0.18215	-0.35	9.47	0.26963	0.39	9.85	0.17258	0.85	10.39	0.01759	-0.09	9.92	1	0.04
	THC0290_N_0071	123885	124433	1	Region	intra	new TR			1.05	9.71	0.00441	1.83	10.1	0.00175	0.36	9.49	0.05896	3.2	9.5	0.00055	0.08	9.53	0.67039	0.19	10.36	0.39053	-0.24	10.15	0.24939	-0.47	10.03	0.32295	-0.33	9.14	0.27736	-0.22	9.2	0.34442	0.21	9.42	0.24053	0.64	9.71	0.02385	0.09	9.43	1	-0.31
	THC0290_0095	124434	125396	1	CDS		Hypothetical protein	THC0290_v2_0096		-0.11	7.63	0.677	0.25	7.81	0.23982	-0.01	7.77	0.96086	2.56	8.61	0.00148	0.2	7.86	0.3817	0.12	8.54	0.72047	0.56	8.76	0.23101	0.82	8.89	0.07892	-0.01	7.77	0.9627	-0.08	7.74	0.79407	-0.04	7.75	0.83306	-0.26	7.44	0.10796	0.05	7.6	1	-0.05
	THC0290_0096	125431	125595	-1	CDS		Hypothetical protein	NA		0.29	5.23	0.37389	1.51	5.84	0.01948	0.64	5.33	0.26459	3.88	6.62	0.03224	-0.45	4.83	0.45989	1.04	7.14	0.38047	2.59	7.91	0.06587	2.9	8.07	0.04055	-0.1	4.96	0.88151	-0.15	4.93	0.85938	-0.07	4.97	0.9141	0.54	4.95	0.04116	0.94	5.14	1	0.08
sdhC	THC0290_0097	125923	126588	1	CDS		Succinate dehydrogenase, cytochrome b subunit	THC0290_v2_0097	sdhC	-0.55	12.62	0.01457	-0.42	12.68	0.03362	0.52	13.18	0.02352	-0.35	12.99	0.03407	-0.45	12.4	0.11501	0.12	12.55	0.59763	0.13	12.55	0.52991	0.31	12.64	0.3084	0.12	12.98	0.59651	0	12.92	0.99336	0.11	12.98	0.48111	-0.11	12.46	0.4878	0.09	12.56	1	-0.03
sdhA	THC0290_0098	126598	128607	1	CDS		Succinate dehydrogenase, flavoprotein subunit	THC0290_v2_0098	sdhA	-0.55	13.38	0.02012	-0.9	13.21	0.01266	0.48	13.86	0.04279	-0.37	13.87	0.03315	-0.4	13.35	0.11454	-0.62	12.65	0.10053	-0.7	12.61	0.05269	-0.73	12.59	0.10091	0.11	13.67	0.68269	-0.06	13.59	0.83651	0.31	13.77	0.23586	-0.16	13.49	0.20817	-0.04	13.55	1	0.14
	THC0290_N_0072	128608	128700	1	Region	intra	new TR			-0.81	12.67	0.00964	-0.9	12.63	0.00484	0.55	13.25	0.02842	-0.49	13.09	0.03705	-0.36	12.59	0.17042	-0.46	11.94	0.13093	-0.66	11.84	0.04752	-0.39	11.98	0.3558	0.07	13.01	0.77096	0.08	13.01	0.77093	0.23	13.09	0.24928	-0.13	12.73	0.33818	-0.09	12.75	1	-0.14
	THC0290_0099	128701	129075	1	CDS		Protein of unknown function	THC0290_v2_0099		-1.01	12.31	0.02611	-1.36	12.14	0.00249	0.55	13.03	0.02691	-0.28	12.4	0.06384	-0.38	12.32	0.15152	-0.48	11.63	0.26167	-0.79	11.47	0.046	-0.78	11.48	0.0723	0.21	12.86	0.39095	0.09	12.8	0.74969	0.19	12.85	0.30957	0.09	12.43	0.68368	0.02	12.39	1	0.09
	THC0290_N_0073	129076	129133	1	Region	intra	new TR			-0.78	12.23	0.00956	-0.57	12.34	0.04868	0.47	12.8	0.07002	-0.28	13	0.04544	-0.3	12.07	0.387	-0.19	11.97	0.60234	-0.48	11.83	0.10145	-0.17	11.98	0.74247	0.23	12.68	0.34598	0.01	12.57	0.97732	0.25	12.69	0.16227	0.27	12.38	0.09544	0.08	12.29	1	-0.14
sdhB	THC0290_0100	129134	129898	1	CDS		Succinate dehydrogenase, iron-sulfur protein	THC0290_v2_0100	sdhB	-0.5	13.46	0.02724	-0.78	13.32	0.01143	0.47	13.91	0.02873	-0.48	13.69	0.00833	-0.38	13.42	0.13215	-0.45	12.97	0.13603	-0.66	12.87	0.05819	-0.47	12.96	0.17827	0.05	13.7	0.84888	0.06	13.7	0.8212	0.27	13.81	0.17135	0.31	13.55	0.12676	0.12	13.46	1	0.14
	THC0290_N_0074	129899	129947	1	Region	3prime	new TR			-1.42	5.29	0.00689	0.52	6.26	0.09669	0.64	6.56	0.03336	1.66	7.6	0.0035	-0.35	5.31	0.16404	-0.53	6.46	0.49729	-0.69	6.38	0.76086	-2.85	5.3	0.03936	0.3	6.39	0.30329	0.89	6.69	0.05609	-0.05	6.22	0.84771	0.66	5.8	0.06635	0.23	5.58	1	0.32
	THC0290_N_0075	129929	130108	-1	Region	indep	new TR			1.97	6.35	0.04844	3.52	7.13	0.00528	0.75	5.63	0.23188	2.65	6.7	0.03383	0.32	5.98	0.36779	2.98	8.19	0.08303	3.49	8.45	0.04258	3.79	8.6	0.04948	0.04	5.28	0.95812	-0.02	5.24	0.98357	0.26	5.38	0.67801	0.51	6.22	0.19976	-0.14	5.89	1	-1.44
dinB	THC0290_0101	130216	131295	1	CDS		DNA polymerase IV, damage-inducible protein DinB	THC0290_v2_0101	dinB	-0.89	7.21	0.00593	-0.68	7.32	0.02263	-0.26	7.55	0.29729	2.71	8.8	0.0008	0.07	7.12	0.78082	0.64	7.18	0.25006	0.8	7.27	0.15397	0.19	6.96	0.92189	0.52	7.94	0.16345	0.67	8.02	0.09434	-0.06	7.65	0.83536	-0.05	7.5	0.63784	-0.16	7.45	1	-0.03
	THC0290_N_0076	131417	131569	1	Region	5prime	new TR			0.59	12.93	0.01702	0.09	12.68	0.53713	0.28	12.62	0.30987	-3.37	11.41	0.0008	-0.42	12.9	0.09418	-0.03	13.33	0.90026	-0.17	13.26	0.41248	-0.17	13.27	0.64774	-2.3	11.34	0.02805	-2.65	11.16	0.02228	-3.45	10.76	0.00896	-1.41	12.3	0.00356	0.02	13.01	1	0
	THC0290_0102	131570	132853	1	CDS		Protein of unknown function	THC0290_v2_0102		0.33	13.8	0.05085	-0.84	13.21	0.01172	0.38	13.48	0.28637	-3.15	12.12	0.0014	-0.22	13.97	0.28682	-0.55	12.56	0.10297	-0.53	12.57	0.06369	-1.05	12.31	0.05178	-2.45	12.07	0.0316	-2.8	11.89	0.02521	-4.19	11.19	0.00575	-1.48	13.28	0.00689	-0.13	13.95	1	0.13
	THC0290_N_0077	132854	133118	1	Region	intra	new TR			0.99	13.15	0.03062	0.99	13.15	0.01011	0.57	12.82	0.09146	-3.43	11.74	0.00055	-0.41	13.02	0.13038	-0.06	12.49	0.86857	0.08	12.56	0.64717	0.06	12.55	0.93101	-2.92	11.08	0.02805	-3.26	10.91	0.02228	-4.18	10.45	0.00575	-1.21	12.55	0.00311	-0.1	13.1	1	-0.01
	THC0290_0103	133119	133640	1	CDS		Protein of unknown function precursor	THC0290_v2_0103		0.24	13.77	0.15365	-1.83	12.74	0.00231	0.49	13.65	0.14844	-3.18	12.32	0.00055	-0.31	14.03	0.21549	-0.68	12.13	0.09732	-0.67	12.13	0.05095	-1.55	11.69	0.04826	-2.73	12.04	0.02805	-3	11.91	0.02746	-4.14	11.33	0.00575	-1.28	13.36	0.00453	-0.04	13.98	1	-0.03
	THC0290_0104	133660	134139	1	CDS		Probable lipoprotein precursor	THC0290_v2_0104		0.19	14.05	0.16942	-1.76	13.08	0.00167	0.23	13.9	0.39894	-2.69	12.85	0.00055	-0.27	14.24	0.21469	-0.85	12.54	0.08417	-0.75	12.59	0.046	-1.64	12.15	0.03738	-2.46	12.56	0.02805	-2.79	12.39	0.02521	-3.93	11.82	0.00575	-1.13	13.79	0.0095	-0.13	14.29	1	0
	THC0290_0105	134151	135113	1	CDS		Protein of unknown function precursor	THC0290_v2_0105		0.27	13.6	0.09716	-1.89	12.52	0.00216	0.46	13.48	0.15853	-2.07	13.05	0.00068	-0.3	13.85	0.20103	-0.86	11.89	0.09143	-0.78	11.93	0.0419	-1.84	11.41	0.03602	-2.82	11.84	0.02805	-2.99	11.75	0.02228	-4.16	11.16	0.00575	-0.88	13.41	0.00913	-0.08	13.81	1	0.15
	THC0290_0106	135128	136084	1	CDS		Protein of unknown function precursor	THC0290_v2_0106		0.54	13.96	0.01727	-1.82	12.78	0.00164	0.4	13.77	0.16708	-1.77	13.94	0.00074	-0.22	14.22	0.31713	-0.76	12.39	0.14679	-0.41	12.56	0.16799	-1.06	12.23	0.14641	-2.75	12.2	0.02805	-2.82	12.16	0.02228	-3.68	11.73	0.00575	-0.56	13.88	0.02204	-0.08	14.12	1	0.17
	THC0290_N_0078	136085	136144	1	Region	3prime	new TR			0.34	7.79	0.27205	2.15	8.69	0.00566	0.23	7.65	0.52663	-0.97	8.16	0.00174	-0.06	7.74	0.84367	0.54	10.44	0.65291	1.83	11.08	0.13225	2.32	11.33	0.15798	0.14	7.6	0.77557	-0.23	7.41	0.62233	-0.19	7.44	0.74498	0.5	7.56	0.02652	0.22	7.42	1	-0.03
	THC0290_N_0079	136118	136225	-1	Region	3prime	new TR			1.06	9.73	0.03229	3.24	10.82	0.00103	0.65	9.63	0.21158	-0.48	10.96	0.03231	-0.02	9.41	0.95563	-0.06	12.46	0.92655	0.31	12.65	0.6102	0.91	12.95	0.42615	0.3	9.46	0.45575	0.8	9.71	0.11948	0.13	9.37	0.79588	0.09	9.15	0.61421	0.04	9.13	1	-0.27
	THC0290_0107	136226	138043	-1	CDS		Putative outer membrane protein precursor	THC0290_v2_0107		0.73	9.26	0.00847	2.42	10.11	0.00129	0.41	9.25	0.05136	-0.5	10.55	0.01426	-0.11	8.98	0.78211	-0.48	11.63	0.12474	0.69	12.21	0.07147	0.8	12.27	0.07289	0.49	9.29	0.10395	0.48	9.29	0.09853	0.01	9.05	0.97357	-0.06	8.67	0.63061	0	8.7	1	-0.03
	THC0290_0108	138173	140128	-1	CDS		Penicillin-binding protein	THC0290_v2_0108		0.78	8.85	0.02856	1.15	9.04	0.00337	0.73	8.8	0.01216	0.06	9.51	0.75146	-0.12	8.39	0.61752	0.19	9.57	0.46231	-0.38	9.28	0.12966	0.24	9.59	0.40433	0.36	8.62	0.17258	0.3	8.59	0.28449	-0.02	8.43	0.88329	0.47	8.32	0.01515	0.21	8.19	1	0.12
	THC0290_0109	140135	140650	-1	CDS		Hypothetical protein	THC0290_v2_0109		0.8	9.48	0.01753	1.41	9.79	0.00167	0.16	9.36	0.32597	-0.61	10.41	0.00501	-0.13	9.26	0.50181	0.85	11.22	0.12599	1.21	11.4	0.08191	0.53	11.06	0.31586	-0.15	9.2	0.5518	-0.32	9.11	0.29754	-0.28	9.14	0.18034	0.77	9.29	0.01535	0.08	8.95	1	0.02
	THC0290_0110	140658	140933	-1	CDS		Putative plasmid stabilization system protein	THC0290_v2_0110		1.11	11.02	0.00425	1.51	11.21	0.00165	0.69	10.93	0.07465	-0.79	11.19	0.00386	0.01	10.82	0.98627	1.11	12.74	0.08417	2.42	13.39	0.02834	3.13	13.75	0.03602	-0.57	10.3	0.20526	-0.57	10.3	0.18092	-0.07	10.55	0.848	0.59	10.87	0.04131	-0.01	10.56	1	-0.15
	THC0290_0111	140930	141169	-1	CDS		Hypothetical protein	THC0290_v2_0111		1.24	11.63	0.04134	1.7	11.86	0.00911	0.47	11.31	0.14456	-0.88	11.11	0.00254	0.05	11.38	0.83203	1.66	13.24	0.08417	3.08	13.95	0.02834	3.1	13.96	0.02773	-0.29	10.93	0.49169	-0.33	10.91	0.34458	-0.23	10.96	0.45998	0.15	11.26	0.40063	0.17	11.27	1	-0.28
radA	THC0290_0112	141203	142564	-1	CDS		DNA repair protein RadA	THC0290_v2_0112	radA	-0.55	9.74	0.04388	-1.64	9.19	0.00124	-0.69	9.81	0.02598	1	9.31	0.00376	0.26	10.02	0.23472	0.25	8	0.49705	-0.32	7.71	0.40776	-1.16	7.29	0.07617	-0.23	10.04	0.38018	-0.17	10.07	0.56403	-0.06	10.13	0.80809	-0.84	9.43	0.0056	0.13	9.91	1	-0.13
	THC0290_0113	142567	143847	-1	CDS		Protein of unknown function precursor	THC0290_v2_0113		-0.01	10.52	0.96865	-0.42	10.31	0.0482	-0.23	10.43	0.12883	1.09	10.8	0.00175	0.32	10.74	0.29093	0.38	10.5	0.2226	-0.07	10.28	0.79401	-0.88	9.87	0.07386	-0.26	10.42	0.28123	-0.42	10.34	0.10741	0.36	10.73	0.10745	-0.46	10.25	0.09459	0.07	10.51	1	-0.03
	THC0290_0114	143895	144854	-1	CDS		Probable transmembrane protein of unknown function	THC0290_v2_0114		-0.71	10.37	0.00886	-0.93	10.26	0.00771	-0.76	10.57	0.02214	1.73	10.38	0.00064	-0.13	10.12	0.7052	0.24	9.62	0.41317	0.6	9.8	0.30522	1.53	10.26	0.03973	-0.41	10.74	0.25996	-0.52	10.69	0.1118	-0.3	10.8	0.23816	-0.59	9.97	0.02109	0.1	10.31	1	-0.11
panD	THC0290_0115	144859	145209	-1	CDS		Aspartate 1-decarboxylase	THC0290_v2_0115	panD	0.26	11.68	0.18907	0.75	11.93	0.00894	-0.34	11.45	0.08095	0.09	11.43	0.59216	-0.2	11.31	0.4449	0.18	11.77	0.52144	0.97	12.17	0.0754	0.81	12.09	0.12144	-0.15	11.55	0.58483	-0.24	11.5	0.36927	-0.12	11.56	0.5084	-0.07	11.38	0.67338	-0.04	11.39	1	-0.08
panC	THC0290_0116	145223	146071	-1	CDS		Pantoate--beta-alanine ligase	THC0290_v2_0116	panC	-1.42	10.81	0.00686	-1.72	10.66	0.00142	-0.85	11.23	0.01068	-0.94	10.3	0.05173	0.05	11.02	0.8747	0.1	9.36	0.75676	-0.12	9.25	0.8567	0.46	9.54	0.38442	-0.55	11.38	0.08426	-0.74	11.29	0.04635	-0.95	11.18	0.01365	-1.4	10.84	0.00565	-0.18	11.45	1	-0.17
	THC0290_0117	146180	146989	1	CDS		Protein of unknown function	THC0290_v2_0117		0.25	12	0.10202	0.59	12.17	0.01972	0.19	12.03	0.3456	0.56	12.66	0.00663	-0.11	11.87	0.54606	0.06	12.55	0.78553	-0.04	12.5	0.82252	-0.04	12.5	0.90535	0.11	12	0.70648	0.14	12.01	0.61875	-0.05	11.91	0.83785	0.53	12.13	0.01561	0.07	11.9	1	-0.04
	THC0290_0118	146989	148653	1	CDS		Probable lipoprotein precursor	THC0290_v2_0118		0.03	12.58	0.81181	-0.26	12.43	0.11799	0	12.72	0.98937	0.81	12.88	0.00447	-0.08	12.55	0.66523	-0.28	12.38	0.31225	-0.54	12.25	0.08343	-0.71	12.17	0.14971	0.13	12.78	0.69669	0.17	12.8	0.57039	0.16	12.79	0.52263	0.1	12.62	0.42537	0.01	12.57	1	-0.05
glmS	THC0290_0119	148660	150507	1	CDS		Glucosamine--fructose-6-phosphate aminotransferase [isomerizing]	THC0290_v2_0119	glmS	-0.62	13.36	0.01587	-1.19	13.07	0.00598	0.12	13.59	0.40517	-0.11	13.31	0.50863	0	13.45	0.99735	-0.84	12.49	0.08417	-0.75	12.53	0.04283	-1.17	12.32	0.04385	0.07	13.57	0.78039	0.13	13.6	0.54009	-0.01	13.53	0.94346	-0.44	13.28	0.03683	-0.03	13.49	1	0.04
	THC0290_0120	150779	153613	1	CDS		Probable TonB-dependent outer membrane receptor precursor	THC0290_v2_0120		1	12.05	0.01179	0.39	11.75	0.04789	0.56	11.73	0.03576	0.12	13.79	0.2561	-0.03	12.23	0.92804	-0.05	12.08	0.84712	-0.14	12.04	0.44351	-0.27	11.97	0.41617	0.04	11.47	0.88541	-0.13	11.39	0.62958	0.79	11.84	0.01945	0.34	11.89	0.04295	0.13	11.79	1	0
	THC0290_N_0082	153614	153714	1	Region	intra	new TR			0.92	10.84	0.01678	0.43	10.6	0.13734	0.69	10.57	0.02845	0.29	12.69	0.06931	0.01	11.07	0.99169	-0.35	11.12	0.43983	-0.3	11.14	0.20587	-0.8	10.89	0.22173	0.05	10.25	0.88554	0.14	10.3	0.67651	0.88	10.67	0.02193	0.35	10.7	0.10614	0.14	10.59	1	0.12
	THC0290_0121	153715	155214	1	CDS		Probable lipoprotein precursor	THC0290_v2_0121		0.99	11.94	0.00626	0.42	11.65	0.04694	0.43	11.5	0.15909	0.32	13.55	0.03069	-0.13	12.08	0.67882	-0.4	12.01	0.20269	-0.16	12.13	0.48302	-0.04	12.19	0.91343	0.07	11.32	0.85052	-0.02	11.27	0.9666	0.88	11.72	0.04872	0.3	11.74	0.19908	0.08	11.64	1	0.03
	THC0290_N_0084	155251	155313	-1	Region	indep	new TR			1.26	7.92	0.20012	1.33	7.96	0.17744	-0.09	7.39	0.7761	0.74	8.3	0.49475	0.02	7.92	0.95876	0.07	7.79	0.98289	0.1	7.81	0.94699	-0.46	7.53	0.90895	0.24	7.56	0.59358	0.47	7.68	0.28086	-0.1	7.39	0.79206	-0.23	7.56	0.42972	0.07	7.71	1	-0.51
	THC0290_N_0085	155311	155418	1	Region	5prime	new TR			0.53	8.83	0.08896	0.07	8.59	0.79099	-0.02	8.56	0.94195	0.57	9.38	0.01952	0.24	8.86	0.24111	-0.35	9.43	0.32518	-0.73	9.24	0.19598	-5.6	6.81	0.02773	-0.15	8.5	0.57798	0.09	8.62	0.74131	0.15	8.65	0.44826	-0.16	8.23	0.40464	0.06	8.34	1	0.1
atpD	THC0290_0122	155419	156930	1	CDS		ATP synthase beta subunit	THC0290_v2_0122	atpD	-1.09	14.14	0.02906	-1.25	14.05	0.01007	-0.04	14.65	0.77821	-0.65	12.97	0.01002	0.03	14.2	0.87167	-0.81	12.81	0.08636	-0.85	12.79	0.04657	-0.91	12.76	0.07181	-0.06	14.63	0.79391	-0.19	14.57	0.41993	-0.52	14.41	0.03945	-0.72	14.11	0.0063	0.05	14.49	1	0.25
	THC0290_N_0086	156931	157009	1	Region	intra	new TR			-2.07	11.32	0.02677	-2.08	11.32	0.00676	-0.34	12.19	0.13771	-0.5	9.42	0.02959	0.21	11.59	0.39834	-0.89	10.22	0.12393	-1.3	10.02	0.10327	-1.7	9.82	0.07206	-0.34	12.19	0.23589	-0.16	12.28	0.47841	-1.05	11.83	0.01254	-1.16	11.4	0.00729	-0.05	11.96	1	0.39
atpC	THC0290_0123	157010	157291	1	CDS		ATP synthase epsilon subunit	THC0290_v2_0123	atpC	-1.24	14.07	0.0048	-1.72	13.83	0.00477	-0.07	14.56	0.64036	-1.02	12.34	0.00642	0.01	14.11	0.95612	-0.6	12.55	0.2541	-0.82	12.44	0.0753	-0.97	12.36	0.1633	0.01	14.6	0.96431	-0.24	14.48	0.30948	-0.5	14.34	0.05458	-0.74	14.01	0.00666	0.14	14.45	1	0.02
	THC0290_N_0087	157292	157355	1	Region	3prime	new TR			-0.06	6.36	0.81874	0.69	6.73	0.05587	-0.36	6.35	0.1755	0.12	5.59	0.93611	0.72	6.11	0.17684	0.71	5.55	0.80914	2.43	6.41	0.16198	0.94	5.66	0.58404	-0.41	6.33	0.37891	-0.16	6.45	0.68233	-0.95	6.06	0.03978	-0.27	6.09	0.14938	-0.04	6.2	1	0.05
	THC0290_0124	157356	157871	1	CDS		Hypothetical transmembrane protein	THC0290_v2_0124		-0.91	8.44	0.00722	-0.74	8.53	0.00919	-1.21	8.39	0.01003	-1.28	7.82	0.0018	0.06	8.29	0.84556	0.33	7.1	0.24457	0.65	7.26	0.2733	2.34	8.1	0.05783	-0.28	8.85	0.30808	-0.27	8.86	0.33992	-0.31	8.84	0.17193	0.31	8.63	0.03972	0.14	8.54	1	-0.14
	THC0290_N_0088	157872	157951	1	Region	intra	new TR			-1.13	8.52	0.01723	-0.79	8.69	0.05343	-0.81	8.7	0.02701	-2.47	7.36	0.00735	0.3	8.68	0.33367	1.57	7.96	0.10367	1.56	7.95	0.04483	2.46	8.4	0.04276	-0.65	8.78	0.10484	-0.59	8.81	0.09197	-0.25	8.98	0.2759	-0.52	8.54	0.01835	-0.07	8.77	1	0.32
	THC0290_0125	157952	158140	1	CDS		Hypothetical protein	THC0290_v2_0125		-1.03	9.17	0.06104	-1.38	9	0.02343	-1	9.34	0.0146	-1.25	8.78	0.00227	0.21	9.37	0.29138	0.15	7.15	0.81611	1.4	7.77	0.12697	2.37	8.26	0.03602	-0.69	9.5	0.09359	-0.55	9.56	0.10893	-0.38	9.65	0.16652	-0.4	9.35	0.02083	-0.11	9.49	1	-0.03
	THC0290_0126	158144	158260	1	CDS		Hypothetical protein	THC0290_v2_0126		-0.8	9.86	0.01378	-1.15	9.69	0.00515	-1	9.73	0.00932	-1.88	8.63	0.00143	0.02	9.89	0.95138	0.8	8.56	0.08875	1.17	8.75	0.03606	2.06	9.2	0.03936	-0.44	10.01	0.13739	-0.59	9.94	0.06194	-0.4	10.03	0.06386	-0.3	9.68	0.12455	-0.03	9.81	1	-0.25
bioF	THC0290_0127	158321	159478	1	CDS		8-amino-7-oxononanoate synthase	THC0290_v2_0127	bioF	-0.91	9.27	0.01125	-1.39	9.03	0.00224	-1.04	9.13	0.0094	-0.74	9.22	0.0052	0.19	9.28	0.45822	-0.45	6.85	0.52457	-0.02	7.06	0.98675	1.09	7.62	0.16403	-0.17	9.57	0.46309	-0.39	9.46	0.14725	-0.15	9.58	0.35917	-0.15	9.17	0.43019	0.11	9.3	1	0.02
	THC0290_0128	159521	159862	1	CDS		Protein of unknown function precursor	THC0290_v2_0128		-0.01	11.45	0.93761	0.39	11.66	0.06637	-0.84	11.21	0.02218	3.12	13.19	0.00055	0.19	11.56	0.40077	0.4	12.35	0.31242	0.44	12.36	0.16598	0.93	12.61	0.07303	-0.11	11.57	0.7162	-0.04	11.61	0.90773	1.4	12.33	0.01586	-0.64	11.32	0.04897	-0.02	11.63	1	-0.07
	THC0290_N_0089	159863	159978	1	Region	intra	new TR			-0.09	10.05	0.75618	0.78	10.49	0.02379	-0.76	9.93	0.03092	3.55	12.26	0.00053	0.21	10.24	0.40037	-0.3	10.9	0.43328	-0.68	10.71	0.07395	0.16	11.14	0.7408	-0.06	10.28	0.84826	0.06	10.34	0.86932	1.4	11.01	0.0213	-0.46	9.96	0.19095	-0.16	10.11	1	0.29
	THC0290_0129	159979	160953	1	CDS		Putative outer membrane protein precursor	THC0290_v2_0129		1.12	11.8	0.00413	1.87	12.18	0.00893	0.63	11.53	0.08806	1.33	13.46	0.00147	-0.68	11.86	0.13848	0.1	12.34	0.65577	-0.08	12.25	0.64815	0.29	12.43	0.34906	0.41	11.41	0.25761	0.63	11.52	0.1142	0.32	11.37	0.33464	-0.21	11.6	0.53246	-0.03	11.7	1	0.21
	THC0290_N_0090	160954	161007	1	Region	3prime	new TR			0.22	4.14	0.5542	0.44	4.25	0.43448	0.11	4.7	0.92021	2.61	6.02	0.00055	0.06	3.93	0.80106	-0.12	3.93	0.65291	-0.12	3.93	0.59886	1.23	4.61	0.43931	-0.36	4.47	0.64197	-0.47	4.41	0.56441	-0.63	4.33	0.36441	0.6	4.45	0.04346	0.44	4.38	1	-0.84
	THC0290_0130	161008	162009	1	CDS		Probable acyl-protein synthetase	THC0290_v2_0130		0.25	9.27	0.17518	1.18	9.74	0.01027	-0.25	8.99	0.13599	0.48	9.61	0.01145	0.08	8.87	0.69996	0.7	9.69	0.09504	0.86	9.77	0.13155	0.77	9.72	0.07467	0.25	9.23	0.32875	0.46	9.34	0.09586	-0.06	9.08	0.73881	0.54	9.15	0.01328	-0.06	8.85	1	0.06
	THC0290_N_0091	162010	162767	1	Region	3prime	new TR			0.51	7.4	0.02634	1.38	7.84	0.00246	-0.08	7.04	0.61076	1.44	8.29	0.00077	-0.3	7.08	0.36273	-0.04	7.43	0.9256	-3.19	5.85	0.02834	-1.96	6.47	0.0463	0.16	7.16	0.71051	0.04	7.1	0.91188	-0.04	7.06	0.84288	0.54	6.96	0.06905	0.06	6.73	1	-0.12
	THC0290_0131	162019	162429	-1	CDS		Protein of unknown function	THC0290_v2_0131		-1.54	9.66	0.00302	-1.2	9.83	0.00436	-1.12	10.18	0.02355	0	9.73	0.97256	0.06	9.78	0.88392	0.27	8.74	0.58221	0.19	8.7	0.51693	-1.6	7.8	0.04133	-0.38	10.55	0.328	-0.4	10.54	0.33903	-0.75	10.36	0.09902	-1.3	9.63	0.00467	0.05	10.31	1	-0.21
	THC0290_N_0092	162430	162618	-1	Region	intra	new TR			-0.76	9.3	0.0389	-0.18	9.59	0.31694	-0.78	9.61	0.04006	-0.52	8.87	0.04481	0.11	9.18	0.71264	-0.17	8.31	0.46886	0.35	8.57	0.18766	-0.95	7.92	0.57047	-0.06	9.96	0.87094	-0.31	9.84	0.42531	-0.53	9.73	0.17576	-0.44	9.35	0.03097	0.12	9.63	1	-0.29
pheS	THC0290_0132	162619	163638	-1	CDS		Phenylalanine--tRNA ligase alpha subunit	THC0290_v2_0132	pheS	-0.82	11.97	0.01516	-0.49	12.14	0.03537	-0.86	12.1	0.07811	-0.33	11.64	0.06931	-0.02	12.06	0.96416	-0.13	10.92	0.76521	-0.2	10.89	0.38521	-0.77	10.6	0.21583	0.16	12.61	0.74552	-0.03	12.52	0.96772	-0.75	12.16	0.20404	-0.56	12.14	0.03065	-0.1	12.36	1	-0.08
	THC0290_N_0093	163655	163724	-1	Region	5prime	new TR			-1.96	8.89	0.00409	-3.29	8.22	0.00178	-1.24	9.12	0.01368	0.81	9.85	0.00634	0.09	9.11	0.78153	0.51	8.4	0.47151	-4.29	6	0.02749	-4.29	6	0.02773	0.68	10.08	0.14303	0.67	10.07	0.10033	-0.34	9.57	0.39154	-0.79	9.03	0.09886	-0.25	9.3	1	-0.05
	THC0290_0133	163777	164133	-1	CDS		Protein of unknown function	THC0290_v2_0133		-1.53	8.87	0.01632	-1.17	9.05	0.03156	-1.37	9.03	0.00822	1.48	10.18	0.0018	0.28	9	0.36273	1.48	9.27	0.08303	2.29	9.67	0.02749	1.53	9.29	0.03738	0.36	9.9	0.33227	0.46	9.95	0.18153	-0.15	9.64	0.39679	-0.34	9.06	0.14938	-0.03	9.22	1	-0.28
	THC0290_N_0094	164134	164212	-1	Region	5prime	new TR			-1.26	7.89	0.01256	-1.6	7.72	0.1096	-1.3	8.12	0.00822	1.74	9.44	0.00161	0.25	7.96	0.40409	1.16	7.84	0.14855	2.63	8.58	0.06938	0.91	7.72	0.64559	0.17	8.86	0.63428	0.27	8.91	0.42378	0.02	8.79	0.8923	-0.06	8.25	0.77134	0.01	8.29	1	-0.4
	THC0290_N_0095	164214	164791	-1	Region	repeated_region	new TR			-1.64	7.66	0.00413	-3.62	6.67	0.00355	-1.19	8.42	0.01501	2.49	10.22	0.00122	0.12	8.15	0.69443	-1.11	8.03	0.32434	-0.66	8.25	0.13105	-2.3	7.43	0.04813	-0.3	8.86	0.64256	-0.56	8.73	0.19978	1.01	9.51	0.05875	1.37	8.71	0.00251	0.1	8.08	1	-0.25
	THC0290_0134	164278	164808	1	CDS		Probable transmembrane protein of unknown function	THC0290_v2_0134		0.2	8.84	0.29631	0.87	9.18	0.00855	-0.51	8.35	0.02304	-0.41	8.99	0.36386	0.06	8.81	0.8038	1.29	9.61	0.09001	2.24	10.08	0.03524	2.54	10.23	0.0499	0.24	8.72	0.31035	0.09	8.65	0.74867	-0.1	8.55	0.53373	-0.26	8.37	0.16024	0.07	8.53	1	-0.3
batE	THC0290_0135	164792	165535	-1	CDS		BatE protein	THC0290_v2_0135	batE	-0.52	8.99	0.04713	-2.02	8.24	0.00169	-1.02	9.09	0.00932	1.84	10.5	0.00055	0.14	9.13	0.49749	-0.97	9.24	0.16134	-0.19	9.63	0.48632	-1.65	8.9	0.0433	-0.26	9.47	0.51106	-0.16	9.53	0.50784	1.09	10.15	0.0114	0.99	9.4	0.00628	0.04	8.93	1	-0.18
	THC0290_N_0096	164809	165563	1	Region	3prime	new TR			0.05	7.06	0.71183	0.35	7.21	0.08904	-0.53	6.69	0.05651	0.38	7.74	0.30999	-0.13	7.08	0.70161	-0.51	6.08	0.67501	-1.31	5.68	0.17355	-0.43	6.12	0.72987	0.17	7.04	0.64463	-0.15	6.88	0.69711	-0.62	6.64	0.1821	-0.42	6.65	0.34706	-0.01	6.86	1	-0.1
	THC0290_N_0097	165536	166702	-1	Region	repeated_region	new TR			-0.73	13.45	0.02039	-2.56	12.54	0.0014	-0.6	13.69	0.02259	1.05	14.41	0.00393	0.16	13.85	0.59069	-0.85	12.55	0.16393	-0.5	12.72	0.11302	-0.18	12.88	0.53259	-0.5	13.74	0.12497	-0.63	13.67	0.09456	0.97	14.48	0.01554	0.52	13.9	0.01186	-0.01	13.64	1	-0.2
batD	THC0290_0136	166703	168505	-1	CDS		BatD protein	THC0290_v2_0136	batD	-1.24	10.58	0.00494	-3.02	9.69	0.00086	-1.08	10.9	0.01097	1.42	11.6	0.00147	0.28	10.9	0.37559	-0.78	10.28	0.21909	-0.5	10.42	0.16005	-0.96	10.19	0.06929	-0.7	11.09	0.11991	-0.63	11.13	0.06842	0.84	11.87	0.01956	0.31	11.08	0.04678	0	10.93	1	0.09
batC	THC0290_0137	168527	169240	-1	CDS		BatC protein	THC0290_v2_0137	batC	-0.71	10.64	0.00977	-2.61	9.69	0.00275	-0.77	10.81	0.01243	1.88	11.86	0.0006	0.15	10.93	0.66625	-0.61	11.05	0.10614	-0.16	11.27	0.42675	-0.49	11.11	0.18871	-0.67	10.86	0.0816	-0.78	10.81	0.04363	1.35	11.87	0.00832	0.82	11.27	0.00853	-0.05	10.83	1	-0.09
	THC0290_N_0098	169241	170135	-1	Region	repeated_region	new TR			0.17	14.98	0.58533	-1.86	13.97	0.00178	-0.27	14.78	0.11653	0.67	15.18	0.00852	0.07	15.2	0.87995	-0.44	14.13	0.58185	-0.17	14.26	0.58404	-0.1	14.3	0.82175	-0.25	14.79	0.28576	-0.33	14.76	0.22318	1.38	15.61	0.00755	0.57	15.19	0.01989	-0.03	14.89	1	-0.32
batB	THC0290_0138	170136	171176	-1	CDS		BatB protein	THC0290_v2_0141	batB	-0.81	10.76	0.01377	-2.47	9.93	0.00086	-0.97	10.9	0.01406	1.72	11.32	0.00133	0.13	11.12	0.47032	-0.7	11.08	0.15115	-0.59	11.13	0.10574	-1.26	10.8	0.07867	-0.61	11.08	0.12381	-0.67	11.05	0.07477	1.22	11.99	0.01438	0.45	11.21	0.09494	0.05	11.01	1	-0.17
	THC0290_N_0099	171177	171320	-1	Region	intra	new TR			-1.49	10.78	0.02189	-2.96	10.04	0.00226	-1.19	11.05	0.00839	1.33	11.46	0.00144	0.42	11.26	0.11733	-0.5	11.56	0.15435	-0.37	11.62	0.12324	-0.55	11.53	0.15358	-0.9	11.2	0.06	-0.84	11.22	0.0374	1.18	12.24	0.02528	0.56	11.42	0.03186	-0.09	11.09	1	0.01
	THC0290_0139	171321	171701	-1	CDS		Protein of unknown function	THC0290_v2_0142		-1.14	10.42	0.00839	-2.92	9.53	0.00086	-0.85	10.76	0.01386	1.78	11.21	0.00175	0.17	10.78	0.38483	-0.69	10.72	0.11662	-0.7	10.71	0.062	-1.04	10.54	0.05634	-0.73	10.82	0.06905	-0.74	10.82	0.05077	1.3	11.84	0.01118	0.39	10.99	0.08406	-0.02	10.78	1	-0.25
	THC0290_N_0100	171702	171755	-1	Region	intra	new TR			-0.94	12.71	0.00527	-3.07	11.64	0.00081	-0.75	12.91	0.01842	0.8	12.86	0.0056	-0.02	12.92	0.93905	-0.8	12.14	0.15604	-0.5	12.28	0.10118	-0.43	12.32	0.3262	-0.72	12.93	0.08211	-0.75	12.91	0.07471	1.02	13.8	0.01825	-0.11	12.97	0.66564	0.05	13.05	1	-0.07
batA	THC0290_0140	171756	172757	-1	CDS		BatA protein	THC0290_v2_0143	batA	-1.44	10.79	0.00606	-2.92	10.04	0.00082	-1.03	11.11	0.00854	1	11.59	0.00204	0.25	11.25	0.37073	-0.97	11.03	0.08417	-0.58	11.22	0.11308	-1.13	10.95	0.05527	-0.73	11.26	0.06553	-0.62	11.32	0.09511	1.15	12.2	0.00991	-0.01	11.41	0.97275	-0.12	11.35	1	-0.05
	THC0290_0141	172759	174345	-1	CDS		Probable transmembrane protein of unknown function	THC0290_v2_0144		-1.32	10.72	0.00552	-3.37	9.7	0.00078	-1.17	11.03	0.01187	1.14	10.67	0.00712	0.26	11.1	0.30869	-0.61	10.88	0.22683	-0.49	10.94	0.08318	-0.77	10.8	0.0988	-0.84	11.19	0.0684	-0.79	11.21	0.07471	1.19	12.21	0.01459	0.28	11.26	0.088	-0.07	11.08	1	-0.2
	THC0290_N_0101	174346	176105	-1	Region	repeated_region	new TR			-0.03	15.58	0.85405	-2.45	14.38	0.00088	-0.49	15.37	0.04197	-0.37	14.98	0.05379	-0.11	16.09	0.86117	-0.16	14.81	0.88292	-0.42	14.68	0.29638	-0.26	14.76	0.49869	-0.58	15.33	0.09141	-0.66	15.28	0.05897	0.94	16.08	0.02738	0.22	15.79	0.25501	0.04	15.7	1	-0.12
	THC0290_0142	176106	176972	-1	CDS		Protein of unknown function	THC0290_v2_0145		-1.85	11.93	0.0038	-3.88	10.91	0.00078	-1.02	12.34	0.00892	0.65	10.81	0.00485	0.14	12.54	0.53229	-0.42	11.16	0.15316	-0.58	11.08	0.06657	-0.65	11.05	0.12402	-0.42	12.65	0.14257	-0.52	12.59	0.11108	0.85	13.28	0.01554	-0.7	12.33	0.00768	-0.04	12.66	1	-0.07
	THC0290_N_0102	176973	177041	-1	Region	intra	new TR			-1.75	12.66	0.00302	-3.88	11.59	0.00078	-1.1	13.02	0.01003	0.28	11.48	0.07388	0.2	13.16	0.43074	0.06	11.84	0.83951	-0.17	11.73	0.42045	-0.47	11.58	0.3651	-0.3	13.43	0.25012	-0.6	13.28	0.10893	0.78	13.96	0.02736	-1.01	12.99	0.0048	-0.12	13.44	1	0.1
	THC0290_0143	177042	178046	-1	CDS		ATPase, MoxR family	THC0290_v2_0146		-1.65	12.1	0.00379	-3.17	11.34	0.00078	-0.97	12.48	0.00932	-0.11	10.9	0.38111	0.12	12.64	0.53392	0.41	12.1	0.19226	0.71	12.25	0.0446	0.19	12	0.4795	-0.27	12.83	0.39095	-0.51	12.71	0.076	0.77	13.35	0.01673	-0.95	12.27	0.00568	0	12.74	1	0.02
	THC0290_N_0103	178047	178088	-1	Region	5prime	new TR			-1.85	9.53	0.01558	-3.25	8.82	0.00431	-1.06	9.95	0.00883	0.01	8.96	0.93875	0.36	10.11	0.29462	0.41	10.53	0.51202	0.41	10.53	0.11579	-0.36	10.14	0.56513	-0.38	10.29	0.30799	-0.38	10.29	0.16059	0.82	10.89	0.01618	-0.91	9.9	0.00575	-0.06	10.32	1	0.18
	THC0290_0144	178131	179366	1	CDS		Protein of unknown function, putative transcriptional regulator	THC0290_v2_0147		1.49	9.31	0.00408	0.83	8.98	0.00871	1.46	9.07	0.00822	1.74	9.97	0.00096	0.07	9.52	0.80137	0.03	9.34	0.90133	0.64	9.64	0.0776	1.49	10.07	0.05411	-0.27	8.21	0.37362	-0.39	8.14	0.12821	1.34	9.01	0.00955	1.37	9.66	0.00336	0.07	9.01	1	-0.15
pphA	THC0290_0145	179347	180096	1	CDS		Phosphoprotein phosphatase	THC0290_v2_0148	pphA	0.81	9.46	0.00819	-0.11	9	0.52255	0.8	9.23	0.01196	1.56	10.18	0.00067	0.18	9.65	0.3988	-0.52	8.55	0.21541	0.36	8.99	0.60259	0.52	9.07	0.3176	-0.01	8.82	0.97461	-0.03	8.81	0.91165	0.9	9.28	0.01673	0.65	9.55	0.00808	0.1	9.28	1	0.07
	THC0290_0146	180146	180661	1	CDS		Probable outer membrane protein precursor, OmpA family	THC0290_v2_0149		-0.8	11.93	0.02388	-1.47	11.6	0.00175	-0.57	12.16	0.06217	-0.1	11.3	0.32091	0	12.26	0.99561	-0.03	10.12	0.93205	0.23	10.25	0.61469	0.62	10.44	0.31983	-0.01	12.44	0.97306	-0.05	12.42	0.8918	-0.93	11.98	0.02571	-0.76	12.15	0.00626	-0.05	12.51	1	-0.45
	THC0290_N_0104	180662	180746	1	Region	intra	new TR			0.01	5.45	0.92857	-1.29	4.8	0.00471	0.43	5.52	0.39557	-0.13	3.92	0.39618	-0.5	5.07	0.24605	1.3	9.3	0.56394	-1.28	8.01	0.66826	1.63	9.47	0.37735	0.32	5.47	0.59358	0.21	5.41	0.8061	-0.46	5.08	0.40573	0.34	5.3	0.1077	0.26	5.26	1	0.2
phnA	THC0290_0147	180747	181328	1	CDS		PhnA protein	THC0290_v2_0150	phnA	-1.08	10.76	0.02677	-1.87	10.36	0.00333	-0.09	11.13	0.48757	-0.65	8.72	0.00895	-0.42	10.97	0.11718	-0.05	8.89	0.97084	1.09	9.46	0.18654	1.85	9.84	0.22758	0.93	11.64	0.05286	0.82	11.58	0.0374	-0.8	10.77	0.01673	-0.67	10.94	0.01408	0.16	11.35	1	0.05
	THC0290_N_0106	181329	181404	1	Region	3prime	new TR			0.04	6.52	0.88783	1.53	7.27	0.06269	0.14	6.84	0.60152	-0.35	4.7	0.12192	0.13	6.61	0.52865	0.94	7.97	0.63047	3.23	9.12	0.0486	2.67	8.84	0.2357	0.09	6.81	0.80078	0.29	6.91	0.39402	-0.35	6.59	0.23262	-0.42	6.72	0.61325	-0.43	6.71	1	0.28
	THC0290_N_0105	181329	181417	-1	Region	3prime	new TR			0.87	8.79	0.0062	2.18	9.45	0.00381	-0.13	8.24	0.37788	-1.96	9.32	0.00067	0.06	8.57	0.83268	1.23	10.31	0.08303	0.87	10.12	0.06133	-0.84	9.27	0.48036	-0.1	8.25	0.7004	-0.12	8.24	0.60891	-0.15	8.23	0.43447	0.31	8.6	0.14035	0	8.44	1	0.23
gpsA	THC0290_0148	181418	182413	-1	CDS		Glycerol-3-phosphate dehydrogenase (NAD(P)+)	THC0290_v2_0151	gpsA	0.15	11.05	0.2684	0.25	11.1	0.18797	-0.06	10.93	0.66634	-1.16	10.8	0.00136	0.03	11.21	0.88517	0.31	11.07	0.21555	0.65	11.24	0.12888	0.16	10.99	0.74893	0.16	11.04	0.53825	0.33	11.12	0.21383	0.1	11.01	0.56184	-0.06	11.06	0.61517	0.07	11.13	1	-0.02
	THC0290_N_0107	182563	182671	1	Region	indep	new TR			1.85	4.86	0.02002	4.89	6.38	0.00319	-0.07	3.99	0.72499	1.71	4.77	0.02321	0.07	3.93	0.68867	2.45	10.94	0.21673	1.37	10.4	0.43084	4.34	11.88	0.05448	-0.15	3.95	0.58665	-0.17	3.94	0.50746	2.2	5.13	0.00575	0.01	3.9	0.96228	-0.02	3.88	1	-0.02
	THC0290_N_0108	182582	182666	-1	Region	3prime	new TR			-1.24	4.88	0.00392	0.2	5.6	0.20577	-0.06	5.62	0.90995	-0.09	3.9	0.46523	0.19	4.91	0.50181	0.09	5.01	0.96735	-1.1	4.41	0.26344	-1.07	4.43	0.30279	1.29	6.29	0.05144	1.64	6.46	0.03187	-0.34	5.47	0.21678	0.16	4.81	0.52707	0.03	4.74	1	-0.1
	THC0290_0149	182667	183833	-1	CDS		Probable alcohol dehydrogenase	THC0290_v2_0152		-0.42	12.91	0.05278	-1.38	12.43	0.00188	-0.56	12.97	0.01867	-1.76	11.73	0.00124	-0.09	13	0.58648	-0.14	12.97	0.55826	-0.33	12.87	0.16446	-0.15	12.96	0.59818	0.49	13.5	0.13399	0.35	13.42	0.17152	0.61	13.56	0.02595	-0.21	12.78	0.13053	0.03	12.91	1	-0.03
nadD	THC0290_0150	183908	184489	-1	CDS		Nicotinate-nucleotide adenylyltransferase	THC0290_v2_0153	nadD	-0.13	10.55	0.42792	-0.65	10.29	0.04158	-0.91	10.44	0.01153	-1.35	10.39	0.00307	0.22	10.49	0.32698	1.04	10.15	0.08661	1.89	10.57	0.02834	1.04	10.15	0.05781	-0.45	10.67	0.1245	-0.51	10.64	0.11194	-0.48	10.66	0.06065	-0.39	10.35	0.04326	0	10.55	1	-0.01
	THC0290_N_0109	184225	184363	1	Region	indep	new TR			0.6	7.06	0.01508	1.49	7.51	0.00639	0.18	6.82	0.23975	1.53	7.88	0.03839	0.11	7.08	0.80451	0.74	8.7	0.52353	1.36	9.01	0.30752	1.98	9.32	0.13907	-0.06	6.71	0.91644	-0.47	6.5	0.19077	0.62	7.05	0.02578	0.6	6.92	0.07138	0.05	6.64	1	-0.3
	THC0290_0151	184765	187650	-1	CDS		Probable TonB-dependent outer membrane receptor precursor	THC0290_v2_0154		-0.06	14.4	0.68591	-0.34	14.26	0.09432	-0.12	14.39	0.49766	-0.47	12.9	0.00929	-0.09	14.02	0.62479	-0.98	12.6	0.10895	-0.08	13.05	0.79872	0.71	13.44	0.12795	-0.37	14.26	0.17219	-0.36	14.27	0.15131	0.09	14.49	0.56999	-0.98	13.6	0.00423	0.01	14.1	1	-0.13
	THC0290_N_0112	187683	187830	-1	Region	intra	new TR			-0.3	10.28	0.06539	-1.27	9.79	0.00204	0.15	10.61	0.29645	-0.44	10.11	0.01409	0.1	10.43	0.60125	-0.49	8.95	0.14208	-1.08	8.66	0.14877	0.66	9.53	0.09435	-0.55	10.26	0.09544	-0.61	10.23	0.06153	-0.09	10.49	0.69157	-0.87	9.76	0.01858	0.01	10.2	1	-0.12
pgi	THC0290_0152	187831	189474	-1	CDS		Glucose-6-phosphate isomerase	THC0290_v2_0155	pgi	-0.05	11.68	0.73316	-0.75	11.33	0.00836	0.13	11.66	0.41324	-1.39	11.32	0.00087	0.03	11.86	0.90626	-0.62	10.21	0.33103	-0.4	10.32	0.30731	-0.37	10.34	0.37178	-0.23	11.48	0.37362	-0.42	11.38	0.14246	-0.17	11.51	0.42178	-0.12	11.55	0.30133	0.05	11.63	1	0.16
rplY	THC0290_0153	189616	190227	-1	CDS		50S ribosomal protein L25	THC0290_v2_0156	rplY	-0.36	14.26	0.05655	-0.19	14.34	0.21794	0.08	14.6	0.59659	-0.36	13.48	0.02121	0.02	14.16	0.91278	-0.72	13.32	0.10745	-0.78	13.29	0.05839	-0.69	13.33	0.11096	0.03	14.57	0.92563	0.12	14.61	0.64192	-0.29	14.41	0.1682	-0.41	14.2	0.01989	-0.06	14.38	1	0.02
	THC0290_N_0114	190228	190314	-1	Region	intra	new TR			-0.03	12.35	0.87408	0.7	12.71	0.01261	0.48	12.42	0.02534	-0.76	11.01	0.02394	-0.09	12.1	0.6609	-0.72	11.89	0.1557	-0.71	11.89	0.13789	-0.87	11.81	0.27394	-0.22	12.07	0.40682	-0.13	12.11	0.57576	-0.08	12.14	0.63606	-0.13	12.16	0.34605	0.1	12.27	1	-0.04
prsA	THC0290_0154	190315	191256	-1	CDS		Ribose-phosphate diphosphokinase	THC0290_v2_0157	prsA	0.1	13.42	0.4578	0.44	13.6	0.03973	0.48	13.59	0.02576	-0.69	12.26	0.00484	-0.08	13.34	0.67984	-0.71	12.76	0.12061	-0.68	12.78	0.0664	-0.54	12.85	0.16282	-0.24	13.23	0.37681	0.01	13.35	0.9823	-0.04	13.33	0.81896	-0.39	13.43	0.03676	-0.02	13.62	1	0.17
	THC0290_N_0115	191257	191300	-1	Region	5prime	new TR			0.66	12.76	0.06802	1.02	12.94	0.10423	0.63	12.66	0.03336	-0.57	11.68	0.02238	-0.18	12.54	0.415	-0.05	12.39	0.95927	-0.22	12.3	0.61726	0.33	12.57	0.68522	-0.08	12.3	0.82218	0.04	12.36	0.9105	-0.02	12.34	0.94634	-0.55	12.61	0.02891	0.1	12.93	1	-0.33
	THC0290_tRNA_0003	191432	191514	1	tRNA		transfer RNA-Leu			2.62	12.42	0.02039	4.26	13.24	0.00408	1	12.4	0.0316	-1.41	12.87	0.00741	-0.08	12.66	0.85117	1.43	15.31	0.20908	1.52	15.36	0.14852	2.06	15.63	0.10786	-0.01	11.9	0.97566	-0.36	11.73	0.40824	0.21	12.01	0.65725	-0.15	12.2	0.81001	0.01	12.29	1	-0.52
	THC0290_N_0118	191567	191761	-1	Region	3prime-PT	new TR			0.92	8.13	0.11958	1.72	8.53	0.00448	-0.42	7.94	0.09678	3.24	8.94	0.00096	0.16	7.75	0.64357	0.01	10.4	0.99417	-0.37	10.22	0.4936	-0.69	10.05	0.60227	-1.02	7.64	0.08109	-0.74	7.78	0.14089	0.41	8.36	0.12597	0.1	7.75	0.62198	0.4	7.9	1	-0.28
	THC0290_tRNA_0004	191804	191888	-1	tRNA		transfer RNA-Leu			1.51	8.52	0.14504	3.91	9.72	0.00503	0.27	7.8	0.28568	0.57	8.65	0.4723	0.01	7.82	0.98714	1.88	11.31	0.08824	2.47	11.61	0.03343	3.58	12.16	0.03936	0.23	7.78	0.51698	0.17	7.75	0.5644	0.07	7.7	0.80644	0.42	7.93	0.12123	0.4	7.91	1	-0.58
	THC0290_N_0121	191971	192020	1	Region	5prime	new TR			-0.26	11.37	0.31679	-0.45	11.28	0.03779	-0.16	11.34	0.26938	-1.61	10.95	0.0008	0.14	11.51	0.57637	0.18	10.6	0.72047	0.72	10.88	0.20553	1.06	11.04	0.1453	0.19	11.52	0.41833	0.1	11.48	0.64873	-0.48	11.18	0.05855	0.34	11.6	0.08137	0.14	11.5	1	-0.28
	THC0290_0155	192021	193409	1	CDS		ArgE/DapE/Acy1 family protein	THC0290_v2_0158		-0.3	12.11	0.20393	-0.61	11.95	0.05156	-0.01	12.17	0.95568	-1.06	11.99	0.00123	0.06	12.37	0.80211	-0.3	11.29	0.25454	-0.14	11.37	0.50572	-0.31	11.29	0.30729	0.23	12.28	0.37891	0.14	12.24	0.50845	-0.33	12	0.09493	0.28	12.35	0.06262	0.04	12.23	1	0.04
	THC0290_0156	193420	193971	1	CDS		Probable phospholipid N-methyltransferase	THC0290_v2_0159		-0.43	11.31	0.05367	-1.09	10.98	0.02113	-0.35	11.4	0.11732	-0.49	11.41	0.01004	0.16	11.43	0.52865	-0.48	10.24	0.1328	-0.38	10.29	0.11421	-1.38	9.79	0.17672	0.05	11.6	0.87033	0.13	11.63	0.62612	-0.45	11.34	0.08919	0.11	11.47	0.37422	0.05	11.44	1	0.08
	THC0290_N_0122	193972	194172	1	Region	3prime	new TR			0.41	9.95	0.03754	-0.89	9.3	0.00484	-0.12	9.99	0.46565	0.73	10.03	0.01611	-0.08	9.82	0.705	-1.35	8.01	0.15111	-0.72	8.32	0.12801	-4.81	6.28	0.02773	-0.28	9.91	0.32019	-0.16	9.97	0.51742	-0.2	9.95	0.32776	0.45	10.12	0.03336	-0.27	9.76	1	-0.23
	THC0290_0157	194650	195750	1	CDS		Probable transmembrane protein of unknown function	THC0290_v2_0160		1.03	8.64	0.01516	2.49	9.37	0.00108	0.08	8.18	0.55781	1.65	9.99	0.00077	-0.05	8.15	0.88556	1.3	11.35	0.08303	1.66	11.53	0.02861	1.45	11.42	0.05531	0.42	8.35	0.1725	0.14	8.21	0.50565	1.53	8.9	0.00607	0.19	8	0.22446	0.04	7.92	1	0.1
pepP	THC0290_0158	196171	197463	1	CDS		Xaa-Pro aminopeptidase	THC0290_v2_0161	pepP	0.2	12.99	0.32784	0.08	12.93	0.82813	0.29	12.8	0.11568	-1.81	12.84	0.00055	-0.09	13.49	0.73584	-0.48	12.25	0.13638	-0.4	12.3	0.12303	-0.29	12.35	0.33304	0.11	12.72	0.6731	0.06	12.69	0.83513	-0.4	12.46	0.08835	0.1	13.01	0.41961	0.02	12.97	1	0.14
	THC0290_0159	197573	198358	1	CDS		Probable hydrolase	THC0290_v2_0162		-0.6	8.09	0.01309	0.65	8.72	0.01353	-0.79	8.25	0.01287	-0.16	7.72	0.59647	0.09	7.94	0.73774	0.24	7.66	0.41239	-0.91	7.08	0.25953	-0.67	7.2	0.39918	-0.1	8.6	0.74275	-0.05	8.62	0.86728	-0.86	8.22	0.0207	-0.1	8.03	0.40846	0.12	8.14	1	-0.15
	THC0290_N_0123	198042	198354	-1	Region	3prime	new TR			0.47	8.26	0.18064	-0.01	8.02	0.98284	0.09	8.16	0.50565	2.63	9.5	0.00066	0.28	8.42	0.32056	0.03	6.43	0.96138	-1.13	5.85	0.08162	-2.5	5.17	0.03963	-0.3	7.97	0.23572	-0.03	8.1	0.92258	0.99	8.61	0.01287	0.58	8.35	0.01735	-0.05	8.04	1	-0.03
	THC0290_0160	198355	201123	-1	CDS		Protein of unknown function	THC0290_v2_0163		0.16	9.91	0.38562	-0.8	9.43	0.00572	-0.14	9.82	0.31976	1.41	10.22	0.00144	0.45	10.21	0.08702	0.25	8.89	0.3294	0.44	8.99	0.25217	0.06	8.8	0.9271	-0.07	9.86	0.8173	-0.05	9.87	0.85457	0.71	10.25	0.01989	0.17	10.03	0.16137	0.01	9.95	1	0.04
	THC0290_N_0124	198359	198406	1	Region	3prime	new TR			-0.27	4.84	0.33438	0.23	5.09	0.42234	-0.97	4.84	0.01147	-0.31	4.15	0.08938	-0.34	4.67	0.37085	-0.97	4.86	0.53103	0.57	5.63	0.75134	-0.99	4.85	0.52161	-0.64	5.01	0.13399	-0.94	4.86	0.12327	-1.26	4.7	0.00896	0.08	4.49	0.87593	-0.29	4.3	1	0.03
	THC0290_N_0125	201124	201191	-1	Region	3prime	new TR			0.29	9.15	0.39044	2.51	10.25	0.0021	0.67	8.82	0.06677	-3.02	8.52	0.00065	0	8.6	0.99815	0.81	9.96	0.09046	-0.13	9.48	0.73986	-1.53	8.78	0.10653	0	8.49	0.99343	0.17	8.57	0.59807	-0.26	8.36	0.32827	0.2	8.85	0.3916	0.46	8.97	1	-0.07
	THC0290_0161	201192	202589	-1	CDS		Outer membrane protein precursor, OmpA family P60	THC0290_v2_0164		0.61	15.66	0.02167	0.14	15.43	0.57931	0.58	15.63	0.02738	-1.69	15.07	0.0008	-0.05	15.94	0.86088	-0.88	14.78	0.13457	-0.7	14.87	0.11625	-0.74	14.85	0.14766	-0.2	15.24	0.41859	-0.05	15.31	0.84661	0.45	15.56	0.06093	-0.09	15.56	0.5793	-0.05	15.59	1	-0.11
	THC0290_N_0126	202620	202692	-1	Region	intra	new TR			-1.04	10.25	0.01426	-1.2	10.16	0.01267	-0.33	10.54	0.08861	-1.24	9.56	0.00119	0.28	10.67	0.29426	-1.62	8.21	0.10745	-1.4	8.32	0.07672	-4.74	6.65	0.03602	-0.12	10.65	0.62465	0.15	10.78	0.48068	-0.94	10.23	0.01377	-0.34	10.57	0.18011	-0.1	10.7	1	0.31
kbl	THC0290_0162	202693	203889	-1	CDS		Glycine C-acetyltransferase	THC0290_v2_0165	kbl	-0.62	12.29	0.01565	-1.23	11.99	0.00325	-0.05	12.43	0.82779	-1.21	11.28	0.00115	0.03	12.5	0.93119	-0.67	10.39	0.13457	-0.2	10.63	0.44709	-0.01	10.73	0.9934	0	12.46	1	0.02	12.47	0.95391	-0.81	12.06	0.03627	-0.24	12.44	0.09933	0.03	12.57	1	0.19
	THC0290_N_0127	203890	203949	-1	Region	5prime	new TR			-0.36	11.62	0.25812	-0.3	11.66	0.41409	-0.24	11.45	0.29019	-1.21	11	0.00403	0.11	11.65	0.74488	-0.12	10.41	0.83791	0.4	10.67	0.40773	0.38	10.66	0.64111	0.07	11.61	0.82722	0	11.57	0.99575	-0.91	11.12	0.04048	-0.09	11.61	0.53611	0.1	11.71	1	-0.2
	THC0290_0163	203950	207108	-1	CDS		Probable ATP-dependent DNA helicase, UvrD/REP family	THC0290_v2_0166		0.27	9.93	0.10573	0.61	10.1	0.01229	0.02	9.75	0.91733	-0.97	10.13	0.00454	0.19	10.21	0.47644	-1.15	9.38	0.08303	-0.18	9.87	0.47466	-0.71	9.6	0.08712	0.36	9.91	0.23081	0.33	9.9	0.22238	-0.11	9.68	0.71231	0.42	10.16	0.05093	-0.16	9.87	1	0.24
sodA	THC0290_0164	207374	207979	1	CDS		Superoxide dismutase [Mn]	THC0290_v2_0167	sodA	0.61	13.15	0.01608	0.99	13.34	0.0065	0.32	13.06	0.28009	-1.84	12.85	0.00055	0.05	13.28	0.82122	-0.01	13.69	0.98739	0.26	13.82	0.2632	0.4	13.9	0.25513	0.14	12.97	0.7268	0.28	13.04	0.42916	-0.24	12.78	0.45315	0.3	13.11	0.08522	-0.02	12.95	1	0.03
	THC0290_N_0128	207980	208039	1	Region	3prime	new TR			0.55	8.44	0.04572	2.54	9.44	0.0042	0.54	7.93	0.02385	-1.97	8.49	0.01434	-0.12	8.37	0.70713	1.46	10.91	0.08303	0.69	10.52	0.05788	0.48	10.42	0.48495	0.52	7.92	0.10948	0.79	8.06	0.04397	0.16	7.74	0.36637	0.71	8.39	0.01462	0.28	8.17	1	0.22
	THC0290_N_0129	208062	208134	-1	Region	indep	new TR			5.68	12.32	0.01513	7.09	13.02	0.00105	2.38	10.81	0.00822	-1.27	12.89	0.0273	0.17	11.18	0.47297	1.11	16.2	0.12942	0.81	16.05	0.31946	0.6	15.94	0.56311	-0.54	9.35	0.17068	-0.66	9.29	0.05464	2.2	10.72	0.00575	0.03	11	0.90977	0.28	11.13	1	-2.55
	THC0290_N_0130	208381	208488	1	Region	indep	new TR			1	8.31	0.03367	1.86	8.74	0.00175	0.49	8.03	0.11632	2.09	9.16	0.01395	-0.25	7.93	0.415	0.91	10.15	0.08417	0.8	10.1	0.04138	0.8	10.1	0.31983	-0.03	7.77	0.93908	0.18	7.87	0.59864	0.63	8.1	0.12785	1.04	8.21	0.00713	0.47	7.93	1	-0.18
	THC0290_N_0131	208552	208636	-1	Region	3prime	new TR			0.1	6	0.60259	0.84	6.37	0.1019	0.14	6.23	0.72368	-1.02	4.62	0.00265	-0.43	5.63	0.1871	0.49	6.25	0.22578	2.06	7.03	0.03784	-0.95	5.53	0.48159	0	6.15	0.99675	-0.11	6.1	0.86623	-0.18	6.07	0.67524	0.55	5.88	0.13495	0.44	5.83	1	0
tyrS	THC0290_0165	208637	209932	-1	CDS		Tyrosine--tRNA ligase	THC0290_v2_0169	tyrS	-0.62	11.54	0.01702	-0.64	11.53	0.01641	-0.43	11.65	0.03332	-0.85	10.59	0.00198	0.08	11.39	0.71234	-0.29	10.08	0.2464	-0.21	10.12	0.43084	-0.15	10.14	0.5545	0.04	11.88	0.87913	-0.06	11.83	0.80703	-0.61	11.56	0.03502	-0.61	11.46	0.01083	-0.1	11.71	1	0.03
	THC0290_0166	210086	211081	1	CDS		Protein of unknown function	THC0290_v2_0170		0.8	8.61	0.01256	1.95	9.18	0.00164	0.41	8.15	0.04744	-1.23	8.3	0.01303	0	8.5	0.99247	0.87	9.77	0.09046	1.06	9.86	0.03752	1.73	10.2	0.04565	0.35	8.12	0.20313	0.02	7.96	0.93182	0.29	8.09	0.11598	0.59	8.42	0.01551	0.14	8.19	1	0.08
	THC0290_N_0132	210722	211077	-1	Region	3prime	new TR			-1.06	8.86	0.00441	-2.14	8.32	0.00103	-0.49	9.43	0.03263	0.58	7.86	0.07374	-0.18	8.56	0.45139	0.01	7.62	0.98739	-0.37	7.43	0.26344	-0.8	7.22	0.65983	-0.03	9.67	0.93224	0.02	9.69	0.94418	0.05	9.7	0.82629	-0.54	8.68	0.07208	-0.01	8.95	1	-0.17
	THC0290_0167	211078	211500	-1	CDS		Probable lipoprotein precursor	THC0290_v2_0171		-0.34	11.35	0.19211	-0.69	11.17	0.00781	-0.25	11.64	0.14693	-1.19	10.2	0.00703	-0.43	11.2	0.25423	0.08	10.47	0.83997	0.02	10.44	0.9563	-0.06	10.4	0.88771	0.18	11.86	0.44698	-0.03	11.75	0.94568	0.03	11.78	0.8986	-0.44	11.25	0.02349	-0.01	11.47	1	0.01
	THC0290_N_0133	211082	211240	1	Region	3prime	new TR			1.18	7.07	0.05504	2.46	7.71	0.0041	0.01	6.48	0.98717	-0.05	7.25	0.80267	-0.2	6.63	0.58478	0.69	8.22	0.10045	1.06	8.41	0.15677	2.03	8.9	0.05219	-0.36	6.29	0.32688	-0.07	6.44	0.83986	-0.01	6.47	0.98001	0.42	6.59	0.20676	-0.28	6.24	1	-0.19
pyrC1	THC0290_0168	211505	212842	-1	CDS		Dihydroorotase	THC0290_v2_0172	pyrC1	-0.81	11.51	0.01435	-0.74	11.55	0.01079	-0.66	11.64	0.04586	-0.96	10.85	0.00902	-0.17	11.38	0.47446	0.15	10.85	0.59186	0.53	11.04	0.10842	0.43	10.99	0.50776	0.24	12.09	0.44149	0.12	12.03	0.75254	0.08	12.01	0.8327	-0.26	11.65	0.31786	-0.05	11.75	1	-0.18
	THC0290_0169	212865	213590	-1	CDS		Glycosyl transferase, group 2 family protein	THC0290_v2_0173		-1.24	11.01	0.00339	-1.79	10.74	0.00133	-0.81	11.35	0.01101	0.43	10.17	0.03161	-0.09	10.89	0.72252	0.34	10.01	0.18237	1.13	10.4	0.0305	0.63	10.16	0.20686	0.03	11.77	0.91707	-0.11	11.7	0.70284	-0.1	11.71	0.52955	-0.06	11.36	0.64571	0.01	11.39	1	-0.05
	THC0290_0170	213837	215033	-1	CDS		Probable cell surface protein (Leucine-rich repeat protein) precursor	THC0290_v2_0174		0.88	15.21	0.00813	1.05	15.29	0.00671	0.27	14.96	0.10118	0.93	15.6	0.00214	0.18	15.39	0.55926	-0.3	15.79	0.22792	-0.65	15.61	0.04886	-1.82	15.03	0.07559	-0.71	14.47	0.06553	-0.83	14.41	0.04112	0.34	14.99	0.09205	0.36	15.25	0.08297	0.03	15.09	1	-0.08
	THC0290_N_0136	215149	215318	1	Region	repeated_region	new TR			0.94	5.26	0.12779	2.24	5.91	0.0029	-0.02	4.73	0.98344	1	6.41	0.50503	-0.33	5.29	0.19724	0.71	7.08	0.66268	-0.15	6.65	0.94699	4.39	8.92	0.05781	-0.04	4.72	0.96037	0.55	5.02	0.46126	0.29	4.89	0.68834	-0.11	4.92	0.85281	-0.48	4.74	1	-0.14
	THC0290_0171	215347	216612	-1	CDS		Probable cell surface protein (Leucine-rich repeat protein) precursor	THC0290_v2_0175		0.67	14.41	0.02125	1.09	14.62	0.00408	0.06	14.24	0.85211	0.85	15.32	0.00229	0.39	14.54	0.17266	-1.21	14.58	0.08303	-1.11	14.63	0.06464	-2.5	13.94	0.04826	-1.02	13.7	0.07492	-1.17	13.62	0.04397	0.35	14.38	0.26536	0.04	14.48	0.79129	-0.03	14.44	1	-0.2
	THC0290_0172	216630	217619	-1	CDS		Probable cell surface protein (Leucine-rich repeat protein) precursor	THC0290_v2_0176		1.14	14.5	0.00478	1.31	14.59	0.00268	0.06	14.24	0.86162	1.19	15.09	0.00162	0.27	14.37	0.34742	-0.63	14.95	0.10215	-0.88	14.82	0.05895	-2.54	14	0.05716	-0.95	13.74	0.08211	-1.25	13.59	0.04417	0.31	14.37	0.40764	0.28	14.57	0.2272	0.04	14.45	1	0.02
	THC0290_0173	217635	218969	-1	CDS		Probable cell surface protein (Leucine-rich repeat protein) precursor	THC0290_v2_0177		0.78	14.82	0.00792	0.99	14.93	0.00386	0.04	14.64	0.84804	1.12	15.25	0.00624	0.5	14.82	0.07702	-0.62	15.33	0.12053	-1.12	15.08	0.04075	-2.08	14.6	0.03738	-1.17	14.04	0.04332	-1.23	14	0.03187	0.1	14.67	0.64802	0.51	14.95	0.0279	-0.01	14.69	1	-0.07
	THC0290_0174	219283	220551	-1	CDS		Probable cell surface protein (Leucine-rich repeat protein) precursor	THC0290_v2_0178		0.51	14.51	0.11525	1.07	14.79	0.00579	0.1	14.25	0.61003	1.06	15.27	0.00191	0.27	14.39	0.23159	-0.93	15.03	0.08385	-1.33	14.83	0.03395	-2.68	14.15	0.03176	-1.23	13.59	0.04332	-1.48	13.46	0.03187	0.43	14.42	0.09877	0.14	14.5	0.58841	0	14.43	1	-0.09
	THC0290_0175	220567	221559	-1	CDS		Probable cell surface protein (Leucine-rich repeat protein)	THC0290_v2_0180		0.67	14.7	0.05791	1.08	14.91	0.00972	0.04	14.38	0.89264	0.95	15.41	0.0016	0.58	14.75	0.09418	-0.57	15.36	0.10215	-1.39	14.95	0.03119	-2.55	14.37	0.03973	-1.14	13.79	0.06547	-1.39	13.67	0.0374	0.35	14.53	0.32833	0.41	14.83	0.08839	-0.04	14.6	1	-0.11
	THC0290_0176	221575	222702	-1	CDS		Probable cell surface protein (Leucine-rich repeat protein) precursor	THC0290_v2_0182		0.98	14.59	0.01326	1.17	14.68	0.00662	0.05	14.28	0.77931	1.54	15.12	0.00149	0.53	14.62	0.13373	-0.67	15.1	0.0969	-1.18	14.84	0.04179	-1.96	14.45	0.03602	-1.23	13.64	0.03839	-1.24	13.63	0.03187	0.21	14.36	0.35073	0.31	14.7	0.13202	-0.13	14.47	1	-0.03
	THC0290_N_0139	222703	223027	-1	Region	intra	new TR			0.61	13.11	0.01672	0.74	13.17	0.11925	-0.04	13.03	0.89652	2.38	14.35	0.00104	0.53	13.43	0.12105	-0.26	13.76	0.4548	-0.96	13.41	0.062	-2.83	12.47	0.05276	-1.3	12.4	0.05176	-1.66	12.22	0.03187	0.18	13.14	0.63916	0.23	13.48	0.50268	-0.02	13.36	1	0.03
	THC0290_0177	223028	224638	-1	CDS		Probable cell surface protein (Leucine-rich repeat protein) precursor	THC0290_v2_0183		0.87	15.15	0.00588	1.03	15.23	0.00509	0.03	14.77	0.88142	0.95	15.52	0.00252	0.57	15.12	0.06801	-0.04	15.85	0.89838	-0.41	15.66	0.15253	-1.4	15.16	0.06754	-0.75	14.38	0.07271	-1.08	14.22	0.03619	0.19	14.86	0.59342	0.15	15.13	0.57636	-0.21	14.95	1	-0.04
	THC0290_N_0140	224639	224914	-1	Region	repeated_region	new TR			0.09	10.83	0.66051	1.11	11.35	0.03954	-0.32	10.89	0.19311	2.76	12.56	0.00053	0.79	11.24	0.06737	-0.33	12.03	0.24571	-0.96	11.72	0.07322	-1.78	11.31	0.03973	-1.05	10.52	0.05676	-1.21	10.45	0.03676	-0.02	11.04	0.95731	-0.04	11.36	0.86183	-0.26	11.25	1	0.23
	THC0290_0178	224965	225888	-1	CDS		Probable cell surface protein (Leucine-rich repeat protein) precursor	THC0290_v2_0184		1.15	14.24	0.00528	1.37	14.35	0.00226	0.16	14.08	0.33826	1.14	14.92	0.00175	0.14	14.4	0.48672	-0.58	14.78	0.38774	-1.05	14.55	0.05969	-2.09	14.03	0.09299	-1.18	13.41	0.03704	-1.33	13.34	0.02683	-0.07	13.96	0.77988	-0.01	14.34	0.97216	-0.14	14.27	1	-0.16
	THC0290_0179	225904	227169	-1	CDS		Probable cell surface protein (Leucine-rich repeat protein) precursor	THC0290_v2_0185		0.48	15.67	0.03284	0.61	15.73	0.0213	0.31	15.41	0.16348	0.31	16.07	0.03693	0.35	16	0.16355	-0.37	15.93	0.16516	-0.83	15.7	0.04712	-2.21	15.01	0.06324	-0.52	14.99	0.14197	-0.68	14.91	0.07016	0.45	15.48	0.09945	0.23	15.9	0.09164	-0.08	15.75	1	-0.13
	THC0290_0180	227183	228379	-1	CDS		Probable cell surface protein (Leucine-rich repeat protein) precursor	THC0290_v2_0186		0.68	15.78	0.01572	0.81	15.85	0.02813	0.4	15.6	0.04837	0.51	16.24	0.00739	0.49	16.26	0.11718	-0.26	16.09	0.26945	-0.71	15.87	0.06476	-1.83	15.31	0.04758	-0.57	15.12	0.08211	-0.66	15.07	0.05077	0.69	15.75	0.03268	0.3	16.21	0.12704	-0.05	16.04	1	-0.14
	THC0290_0181	228393	229796	-1	CDS		Probable cell surface protein (Leucine-rich repeat protein) precursor	THC0290_v2_0188		0.67	13.25	0.04783	1.48	13.65	0.00348	0.05	13.27	0.74954	2.36	14.43	0.00084	0.63	13.52	0.04716	-0.05	14.12	0.83771	-0.73	13.78	0.04483	-1.83	13.23	0.03738	-1.31	12.59	0.0316	-1.53	12.48	0.02746	0.09	13.29	0.66666	0.46	13.77	0.0565	-0.17	13.45	1	-0.14
	THC0290_N_0142	229797	230072	-1	Region	repeated_region	new TR			0.21	11	0.47353	1.04	11.41	0.02144	-0.31	11.05	0.17907	2.7	12.69	0.00055	0.65	11.34	0.11719	-0.43	12.03	0.18602	-0.99	11.75	0.06597	-1.84	11.33	0.04074	-1.36	10.53	0.03839	-1.35	10.53	0.03187	0.04	11.23	0.93084	0.07	11.49	0.71857	-0.21	11.35	1	0.17
	THC0290_0182	230123	231112	-1	CDS		Probable cell surface protein (Leucine-rich repeat protein) precursor	THC0290_v2_0189		4.09	13.02	0.00649	4.45	13.2	0.00326	0.69	11.71	0.11229	2.11	14.15	0.00056	1.17	13.01	0.04025	-1.02	13.64	0.09689	-3.16	12.57	0.02834	-4.97	11.67	0.06754	-1.87	10.43	0.0316	-1.07	10.84	0.0468	0.19	11.46	0.74498	0.05	12.59	0.8731	-0.48	12.32	1	0.51
	THC0290_0183	231127	232047	-1	CDS		Probable cell surface protein (Leucine-rich repeat protein) precursor	THC0290_v2_0190		2.73	14.12	0.00304	2.82	14.17	0.00103	0.61	13.39	0.01604	1.47	14.67	0.00082	0.68	14.24	0.11718	-1.24	14.85	0.09046	-2.56	14.19	0.02834	-4.06	13.44	0.04897	-1.35	12.42	0.0316	-1.03	12.58	0.03187	0.14	13.16	0.53446	0.63	14.22	0.058	-0.31	13.75	1	-0.12
	THC0290_0184	232062	233117	-1	CDS		Probable cell surface protein (Leucine-rich repeat protein) precursor	THC0290_v2_0191		3.18	12.98	0.00229	3.69	13.23	0.00088	-0.07	11.48	0.86133	1.73	13.48	0.00233	1.46	12.64	0.03886	-1.17	13.41	0.08417	-2.47	12.76	0.02861	-5.03	11.48	0.11423	-1.13	10.95	0.08274	-1.36	10.84	0.04707	0.43	11.73	0.33651	1.5	12.67	0.01246	-0.07	11.88	1	-0.21
	THC0290_0185	233132	234121	-1	CDS		Probable cell surface protein (Leucine-rich repeat protein) precursor	THC0290_v2_0192		6.23	11.76	0.00066	6.68	11.99	0.00078	2.25	9.79	0.01933	1.45	12.71	0.00573	1.6	12.75	0.02396	-0.67	13.82	0.14547	-3.1	12.6	0.02834	-4.31	12	0.03469	-0.17	8.58	0.80213	-0.21	8.56	0.73905	-0.32	8.5	0.63802	2.91	12.81	0.00659	-0.13	11.29	1	0.14
	THC0290_0186	234136	235122	-1	CDS		Probable cell surface protein (Leucine-rich repeat protein) precursor	THC0290_v2_0194		3.75	12.66	0.00339	4.56	13.06	0.00107	0.61	11.13	0.0388	2.34	13.39	0.00084	1.42	12.51	0.04074	0.37	14.16	0.34708	-0.94	13.5	0.04835	-0.84	13.55	0.12343	-1.21	10.22	0.03454	-0.96	10.35	0.03187	0.17	10.91	0.50815	1.91	13.11	0.0042	-0.32	12	1	0.16
	THC0290_0187	235708	236373	1	CDS		Probable transmembrane protein of unknown function	THC0290_v2_0195		0.36	8.69	0.05683	1.91	9.46	0.00106	0.16	8.59	0.49216	2.25	9.32	0.00084	-0.03	8.16	0.89026	0.64	10.62	0.10866	0.68	10.64	0.14248	1.09	10.84	0.08216	-0.17	8.43	0.59975	-0.08	8.48	0.80981	0.6	8.82	0.10292	1.47	9.01	0.00261	0.06	8.31	1	-0.22
	THC0290_0188	236394	237143	1	CDS		Protein of unknown function	THC0290_v2_0196		-2.15	12.19	0.00198	-1.16	12.69	0.00257	-1.28	12.76	0.00839	0.74	11.3	0.00698	-0.07	12.02	0.72417	-0.05	11.56	0.82227	-0.46	11.36	0.08868	-0.21	11.48	0.49491	-0.06	13.37	0.82342	-0.01	13.39	0.96795	-1.29	12.76	0.01173	-0.98	12.58	0.00394	0	13.07	1	-0.02
	THC0290_N_0144	237144	237208	1	Region	intra	new TR			-1.86	11.19	0.01928	-0.17	12.03	0.39142	-1.07	11.36	0.02634	-1.36	9.69	0.00538	-0.18	10.28	0.72211	0.26	9.65	0.60251	-0.39	9.33	0.69094	0.44	9.74	0.58866	0.34	12.06	0.45774	0.54	12.16	0.16575	-0.83	11.47	0.05303	-0.47	11.8	0.03533	0.12	12.09	1	-0.29
	THC0290_0189	237209	237979	1	CDS		Enoyl-CoA hydratase/isomerase family protein	THC0290_v2_0197		-1.88	9.87	0.00302	-1.25	10.18	0.00937	-0.97	10.2	0.04135	-0.61	8.75	0.00813	-0.23	9.3	0.53133	0.06	7.63	0.93821	0.4	7.81	0.29529	0.44	7.82	0.67913	0.16	10.76	0.75926	0.33	10.85	0.43141	-0.75	10.31	0.09868	-0.56	10.75	0.01498	0.01	11.04	1	-0.16
	THC0290_N_0145	237710	238051	-1	Region	3prime	new TR			0.05	7.01	0.81058	-1.21	6.38	0.00446	-0.16	6.98	0.37198	1.9	6.97	0.00243	0.18	7.18	0.56368	1.23	4.58	0.42171	0.21	4.06	0.56396	0.58	4.25	0.46972	-0.73	6.7	0.12334	-0.72	6.7	0.07198	0.26	7.19	0.23709	0.13	6.42	0.67956	0.09	6.41	1	-0.25
	THC0290_N_0146	237980	238652	1	Region	3prime	new TR			-1.8	7.69	0.0035	-1.94	7.62	0.00109	-0.93	8.02	0.01488	0.49	7.28	0.01133	-0.19	7.1	0.64167	0.62	4.37	0.13603	1.03	4.58	0.23101	1.18	4.65	0.43215	-0.14	8.41	0.60548	-0.01	8.47	0.97469	-0.8	8.08	0.02736	-0.67	8.19	0.0121	0.07	8.56	1	-0.28
	THC0290_0190	238052	238456	-1	CDS		Probable protein chain release factor	THC0290_v2_0198		0.32	9.44	0.24806	-0.47	9.05	0.11593	-0.11	9.29	0.45536	-0.22	8.97	0.07033	0.07	9.66	0.84397	1.11	8.43	0.08303	0.32	8.04	0.38107	1.76	8.76	0.13926	-0.41	9.14	0.14673	-0.3	9.19	0.30839	0.18	9.43	0.31452	-0.21	9.33	0.27514	-0.22	9.32	1	-0.08
	THC0290_0191	238456	240570	-1	CDS		Probable bifunctional protein : transcriptional regulator NadR family and of unknown function	THC0290_v2_0199		-0.67	10.12	0.01988	-0.89	10.01	0.00947	-0.42	10.21	0.0532	0.25	9.55	0.06652	0.39	10.48	0.13373	0.15	9.06	0.5503	-0.01	8.98	0.98534	0.1	9.03	0.69534	-0.33	10.26	0.20285	-0.41	10.22	0.16949	-0.05	10.4	0.76969	0.09	10.38	0.42959	0.03	10.36	1	-0.03
pnuC	THC0290_0192	240531	241154	-1	CDS		Nicotinamide mononucleotide transporter PnuC	THC0290_v2_0200	pnuC	-0.37	8.66	0.22791	-1.42	8.13	0.00806	-0.34	8.73	0.05633	1.64	8.96	0.00069	0.18	8.52	0.41517	0.49	6.49	0.79998	1.39	6.94	0.16104	1.84	7.17	0.20674	-0.12	8.84	0.71007	-0.05	8.87	0.85398	-0.29	8.75	0.11932	0.3	8.76	0.11985	-0.08	8.57	1	-0.23
pcrB	THC0290_0193	241163	241885	-1	CDS		PcrB protein homolog	THC0290_v2_0201	pcrB	-0.61	9.04	0.01292	-1.93	8.38	0.00112	-0.38	9.03	0.16433	1.6	9.58	0.00068	0.18	8.99	0.32698	-0.29	7.73	0.47917	0.49	8.11	0.23222	0.67	8.21	0.33223	0.03	9.23	0.94429	0.09	9.26	0.81826	-0.19	9.12	0.5839	0.46	9.14	0.04197	0.02	8.92	1	-0.03
sfp	THC0290_0194	241896	242537	-1	CDS		Probable phosphopantetheinyl transferase	THC0290_v2_0202	sfp	-0.13	9.7	0.39443	-0.5	9.52	0.03114	-0.13	9.73	0.47708	0.75	10.26	0.00428	0.11	9.74	0.60801	-0.03	9.24	0.9629	0.22	9.36	0.63484	0.16	9.33	0.589	0	9.8	0.99675	0.13	9.86	0.60284	-0.19	9.7	0.39072	0.76	9.92	0.00857	0.1	9.59	1	-0.08
ahcY	THC0290_0195	242763	244079	1	CDS		Adenosylhomocysteinase	THC0290_v2_0203	ahcY	-0.02	13.05	0.8858	1.11	13.61	0.0043	-0.04	13.08	0.86845	0.21	11.67	0.17251	-0.22	12.56	0.43562	0.38	14.54	0.24765	-0.33	14.18	0.20424	-0.96	13.87	0.07617	0.39	13.3	0.23088	0.43	13.32	0.17362	-0.21	13	0.39235	0.03	12.81	0.83203	0.03	12.81	1	0
	THC0290_N_0147	244080	244141	1	Region	3prime	new TR			0.74	8.22	0.01735	4.01	9.86	0.00078	0.53	7.86	0.29703	0.39	7.23	0.41045	0.22	7.85	0.50287	0.56	11.12	0.12017	-0.39	10.65	0.15276	-1.04	10.33	0.07069	0.39	7.79	0.31999	0.74	7.97	0.13724	0.2	7.7	0.67765	1.11	8.27	0.01285	0.35	7.89	1	-0.24
	THC0290_0196	244213	244821	-1	CDS		Protein of unknown function	THC0290_v2_0204		0.41	9.7	0.03042	0.76	9.88	0.006	0	9.63	0.99758	-0.12	9.91	0.51046	-0.01	9.62	0.96473	0.38	11.39	0.30823	0.39	11.39	0.13254	-0.07	11.16	0.87375	0.13	9.69	0.69034	0.14	9.7	0.6567	0.6	9.93	0.07843	0.24	9.67	0.14345	0.09	9.6	1	0
	THC0290_N_0148	244877	244927	1	Region	5prime	new TR			-0.15	4.09	0.67181	-0.06	4.13	0.86768	-0.31	4.05	0.18162	1.5	4.64	0.07451	-0.03	3.99	0.93075	-0.73	5.6	0.67575	-0.31	5.81	0.88825	-2.11	4.91	0.0511	-0.24	4.08	0.41403	0.02	4.21	0.97346	-0.22	4.09	0.38515	-0.17	4.07	0.36613	-0.22	4.05	1	-0.28
ltd	THC0290_0197	244941	245891	1	CDS		L-threonine 3-dehydrogenase	THC0290_v2_0205	ltd	0.44	11.51	0.02734	0.35	11.46	0.12015	-0.1	11.36	0.47174	0.54	11.67	0.00598	0.04	11.56	0.8546	-0.02	11.26	0.94874	-0.1	11.22	0.58902	0.44	11.49	0.20939	0.12	11.47	0.61773	0.13	11.48	0.52658	-0.23	11.3	0.25694	0.03	11.41	0.80417	0.09	11.44	1	-0.03
	THC0290_N_0149	245600	246251	-1	Region	repeated_region	new TR			0.53	7.1	0.1631	0.91	7.29	0.00759	-0.12	6.86	0.41451	0.99	7.64	0.01059	-0.11	6.47	0.82457	0.75	7.94	0.18063	0.36	7.75	0.42295	1.45	8.3	0.05272	0.24	7.04	0.52021	0.17	7.01	0.59807	-0.32	6.76	0.21278	0.32	6.58	0.49135	0.12	6.49	1	-0.3
	THC0290_N_0150	245892	245964	1	Region	3prime	new TR			0.41	5.97	0.39532	1.82	6.68	0.00608	0.4	5.57	0.05491	0	5.29	1	0.11	5.55	0.83973	-0.42	6.52	0.8164	0.17	6.82	0.89988	1.88	7.67	0.22758	0.49	5.62	0.23012	0.06	5.4	0.86728	-0.22	5.26	0.35473	1.02	5.08	0.01835	0.53	4.84	1	-0.99
	THC0290_N_0151	245965	246278	1	Region	3prime-PT	new TR			0.39	5.92	0.54168	1.18	6.31	0.0041	-0.35	5.94	0.14328	2.89	7.2	0.00801	-0.01	5.82	0.99247	0.27	6.31	0.66958	1.97	7.16	0.09453	2.79	7.57	0.05194	-0.31	5.96	0.51698	-0.04	6.09	0.90151	-0.58	5.83	0.08835	-0.46	6.18	0.2272	-0.53	6.15	1	0.01
mfd	THC0290_0198	246252	249605	-1	CDS		Transcription-repair coupling factor	THC0290_v2_0206	mfd	-0.32	10.01	0.07938	0.05	10.2	0.86914	-0.24	9.86	0.20057	0.51	9.73	0.00904	0.14	9.78	0.45822	-0.38	9.66	0.21018	-0.31	9.7	0.26972	-0.67	9.52	0.08793	0.32	10.14	0.30735	0.22	10.08	0.40116	-0.29	9.83	0.18574	0.42	10.08	0.03269	0.07	9.91	1	-0.02
	THC0290_0199	249721	250146	1	CDS		Probable transmembrane protein of unknown function	THC0290_v2_0207		0.65	11.57	0.01025	1.4	11.95	0.00216	0.06	11.19	0.84308	-0.69	10.94	0.00853	-0.09	11.3	0.64811	0.39	12.32	0.15435	0.76	12.51	0.05249	0.78	12.52	0.07138	0.02	11.17	0.96031	0.13	11.22	0.75371	-0.23	11.04	0.48809	0.19	11.38	0.17216	0.05	11.31	1	0.05
	THC0290_0200	250231	250752	1	CDS		Hypothetical protein	THC0290_v2_0208		1.28	11.13	0.00413	2.81	11.89	0.00151	0.6	10.57	0.01747	0.31	11.1	0.03315	-0.14	10.52	0.53734	0.17	11.7	0.46946	-0.09	11.57	0.61501	0.78	12	0.07289	0.25	10.4	0.31128	0.43	10.49	0.10164	1.24	10.89	0.01173	0.42	11.1	0.02666	-0.2	10.79	1	-0.1
	THC0290_0201	250719	251186	-1	CDS		Adenylate cyclase family protein	THC0290_v2_0209		1.29	8.97	0.00346	2.42	9.54	0.00171	0.5	8.5	0.05094	-0.55	10.05	0.01677	-0.12	8.5	0.64554	0.58	11.15	0.15111	0.66	11.19	0.11673	0.13	10.92	0.7253	0.79	8.65	0.06743	0.83	8.66	0.04653	-0.1	8.2	0.63196	0.9	8.64	0.01087	0.11	8.25	1	0.01
	THC0290_N_0154	250753	251441	1	Region	3prime	new TR			0.47	9.02	0.03589	1.85	9.71	0.00125	-0.1	8.98	0.56629	1.35	10.29	0.00237	-0.14	8.83	0.50153	-0.45	9.63	0.24058	-0.44	9.64	0.21032	-0.02	9.85	0.9732	-0.46	8.8	0.14236	-0.49	8.78	0.17825	1.5	9.78	0.01015	0.38	9.43	0.0418	-0.27	9.11	1	-0.22
	THC0290_N_0155	251187	251301	-1	Region	5prime	new TR			1.66	9.07	0.02359	3.11	9.8	0.00345	0.49	8.56	0.02917	0.17	10.18	0.49906	0.06	8.5	0.77746	1.3	11.55	0.1322	2.22	12.01	0.06073	1.62	11.7	0.07915	0.66	8.65	0.09439	0.76	8.7	0.10164	0.12	8.38	0.4525	1.13	8.97	0.01076	0.19	8.5	1	-0.41
	THC0290_N_0156	251422	251487	-1	Region	indep	new TR			0.9	8.21	0.20393	3.37	9.44	0.00584	0.63	7.8	0.02767	-0.8	8.39	0.00265	-0.13	7.72	0.62047	1.08	9.85	0.54479	0.89	9.75	0.49089	3.8	11.2	0.10407	-0.18	7.39	0.59241	0.14	7.55	0.59072	0.53	7.75	0.13278	0.14	8.56	0.51182	0	8.49	1	-0.59
	THC0290_N_0157	251489	251576	-1	Region	intra	new TR			-0.31	9.95	0.42664	0.73	10.47	0.112	0.36	10.01	0.53382	-1.15	8.38	0.00644	-0.7	9.65	0.1556	-0.81	9.05	0.09591	-1.12	8.89	0.08805	-0.36	9.27	0.47113	0.97	10.31	0.22536	1.14	10.4	0.13301	0.09	9.87	0.8957	0.27	11.2	0.26378	-0.13	11	1	-0.16
purF	THC0290_0202	251577	253475	-1	CDS		Amidophosphoribosyltransferase	THC0290_v2_0210	purF	-0.62	11.86	0.03453	-0.13	12.1	0.52869	0.26	11.71	0.67252	-1.61	10.46	0.0012	-0.42	11.22	0.33367	-0.44	10.24	0.14051	-0.37	10.28	0.1544	-0.54	10.2	0.18885	0.88	12.03	0.26793	0.98	12.08	0.18812	0.05	11.61	0.95464	0.14	12.63	0.385	0	12.56	1	-0.03
	THC0290_N_0158	253476	253544	-1	Region	3prime	new TR			-0.7	12.39	0.03524	0.49	12.98	0.14664	-0.08	12.43	0.86802	-1.95	10.73	0.00055	-0.39	11.8	0.33368	0.07	11.71	0.76133	-0.07	11.64	0.68342	0.11	11.73	0.77088	0.81	12.87	0.20776	0.94	12.94	0.12153	-0.12	12.41	0.81082	0.4	13.23	0.03479	-0.05	13	1	-0.04
	THC0290_0203	253545	254468	-1	CDS		Carbohydrate kinase, PfkB family	THC0290_v2_0211		-0.67	12.24	0.00953	-0.1	12.53	0.50667	-0.61	12.39	0.01662	-0.19	11.31	0.15043	0.02	11.87	0.91342	0.36	12	0.18396	0.41	12.03	0.15338	0.25	11.95	0.45178	0.24	12.81	0.32688	0.39	12.89	0.12317	-0.79	12.3	0.02072	0.24	12.42	0.13171	0.05	12.32	1	0.12
	THC0290_N_0159	254489	254544	-1	Region	intra	new TR			-1.9	8.62	0.00346	-2.52	8.3	0.00103	-1.54	9.02	0.00822	-0.35	7.79	0.2074	0.32	8.69	0.26844	-1.02	5.69	0.49541	0.35	6.37	0.16233	-2.24	5.08	0.03602	-0.28	9.65	0.26751	-0.25	9.67	0.39761	-0.48	9.55	0.04743	-0.67	8.89	0.00875	0.09	9.28	1	-0.01
rnhA	THC0290_0204	254545	255024	-1	CDS		Ribonuclease HI	THC0290_v2_0212	rnhA	-2.15	8.67	0.00198	-3.09	8.2	0.00078	-1.55	9.01	0.00822	0	8.01	1	0.34	8.66	0.29093	-0.38	6.39	0.31821	-1.33	5.92	0.39842	-0.13	6.52	0.7272	-0.14	9.72	0.53521	-0.21	9.68	0.37514	-0.44	9.57	0.0525	-1.05	8.85	0.00518	0.01	9.38	1	-0.13
purN	THC0290_0205	255026	255595	-1	CDS		Phosphoribosylglycinamide formyltransferase	THC0290_v2_0213	purN	-1.74	8.95	0.00279	-2.07	8.79	0.00107	-1.2	9.33	0.00839	-0.08	8.47	0.82148	0.31	9.07	0.29648	0.34	7.5	0.33536	0.81	7.74	0.04602	1.66	8.16	0.05123	-0.08	9.89	0.71986	-0.21	9.83	0.33196	-0.34	9.77	0.08907	-1.1	9.05	0.00659	0.05	9.63	1	-0.1
	THC0290_N_0160	255408	255603	1	Region	indep	new TR			0.49	6.72	0.03133	0.96	6.96	0.0063	0.33	6.7	0.13065	-0.17	6.66	0.27282	0.02	6.73	0.95662	-0.07	7.23	0.91711	0.82	7.68	0.06464	0.68	7.61	0.35606	0.06	6.57	0.82339	0.01	6.54	0.97729	-0.21	6.43	0.29074	0.62	6.77	0.00781	0.15	6.53	1	-0.16
	THC0290_N_0161	255694	255745	1	Region	5prime	new TR			0.77	13.3	0.15406	-0.01	12.91	0.98007	0.23	13.23	0.42257	-2.76	11.63	0.00055	0.2	13.51	0.41364	0.15	12.06	0.76313	0.57	12.27	0.30774	0.38	12.18	0.67901	-0.3	12.96	0.39825	-0.1	13.06	0.77651	-0.17	13.03	0.59884	-0.26	13.02	0.07467	0.15	13.22	1	-0.24
acpP	THC0290_0206	255770	256006	1	CDS		Acyl carrier protein	THC0290_v2_0214	acpP	0.06	14.32	0.71974	-0.84	13.87	0.01361	0.14	14.34	0.47394	-2.21	12.9	0.00055	-0.05	14.29	0.79788	-0.39	12.48	0.39776	-0.34	12.51	0.36447	-0.28	12.54	0.59947	0.03	14.28	0.9343	0.05	14.3	0.86423	-0.04	14.25	0.88269	-0.23	14.14	0.22037	0.06	14.29	1	-0.04
	THC0290_N_0163	256047	256358	1	Region	5prime	new TR			0.19	14.51	0.44883	-0.15	14.34	0.35738	-0.04	14.44	0.84512	-1.99	12.92	0.00061	-0.03	14.35	0.85696	0.62	13.54	0.11937	0.33	13.4	0.40008	0.64	13.55	0.36708	-0.2	14.36	0.47169	-0.05	14.44	0.86711	-0.07	14.43	0.76928	-0.45	14.19	0.03134	0.06	14.44	1	-0.05
fabF	THC0290_0207	256359	257609	1	CDS		3-oxoacyl-(acyl-carrier-protein) synthase II	THC0290_v2_0216	fabF	-0.47	13.82	0.06807	-1.09	13.51	0.01586	-0.13	13.95	0.49951	-1.19	13.46	0.00124	0.01	14.13	0.98213	-0.8	12.33	0.09732	-0.78	12.34	0.06721	-1.02	12.22	0.05781	0.05	14.04	0.8667	-0.15	13.94	0.58242	0.01	14.02	0.96818	-0.33	13.76	0.04468	0.07	13.96	1	0.1
rnc	THC0290_0208	257618	258358	1	CDS		Ribonuclease III	THC0290_v2_0217	rnc	-1.29	10.39	0.00744	-2.18	9.95	0.0014	-0.83	10.72	0.01119	-0.84	9.5	0.00379	0.19	10.6	0.34608	-0.97	8.7	0.09732	0.24	9.31	0.39878	-0.2	9.09	0.79251	-0.19	11.04	0.45421	-0.22	11.03	0.42394	-0.14	11.06	0.38936	-1.34	10.28	0.00356	-0.08	10.92	1	0
	THC0290_N_0164	258359	258452	1	Region	intra	new TR			-1.25	10.11	0.00684	-2.49	9.49	0.00181	-1.12	10.27	0.01024	-0.13	8.52	0.52966	0.05	10.09	0.83988	-1.48	7.72	0.15489	-0.46	8.22	0.18365	-4.53	6.19	0.02773	-0.52	10.57	0.14539	-0.61	10.53	0.07638	-0.29	10.68	0.17941	-0.98	9.86	0.00555	-0.01	10.35	1	0.04
	THC0290_0209	258470	258949	1	CDS		Protein of unknown function	THC0290_v2_0218		-0.66	10.11	0.01306	-0.2	10.34	0.39034	-1.21	10.13	0.00839	0.19	9.28	0.13793	0.37	9.87	0.1781	0.59	11.31	0.11285	-0.27	10.88	0.21618	-0.44	10.8	0.24891	-0.16	10.65	0.52021	-0.2	10.63	0.39383	-0.38	10.55	0.08942	-0.04	10.13	0.75224	0.08	10.19	1	0.11
pykA	THC0290_0210	258953	260383	1	CDS		Pyruvate kinase	THC0290_v2_0219	pykA	-0.51	11.79	0.03006	-0.31	11.9	0.08006	-0.56	11.89	0.02431	-0.18	11.46	0.27898	0.04	11.69	0.86344	-0.31	12.54	0.23504	-1.04	12.17	0.03606	-1.5	11.94	0.03936	0.32	12.33	0.24955	0.37	12.35	0.14485	-0.27	12.03	0.16533	0.11	11.78	0.57356	-0.11	11.67	1	0
	THC0290_N_0165	260291	260539	-1	Region	3prime	new TR			-0.87	9.71	0.00847	-0.15	10.07	0.27413	-0.64	9.64	0.03381	0.76	9.34	0.01699	0.06	9.6	0.90937	0.06	9.8	0.95937	0.97	10.25	0.09221	1.18	10.36	0.0738	-0.57	9.68	0.08109	-0.61	9.66	0.06191	-0.26	9.83	0.16959	-0.61	9.3	0.03911	0.08	9.65	1	-0.2
	THC0290_0211	260540	261250	-1	CDS		Protein of unknown function	THC0290_v2_0220		-0.88	11.65	0.00789	-1.38	11.4	0.00266	-0.7	11.7	0.0232	-1.19	10.52	0.00111	0.16	11.92	0.39041	0.38	10.57	0.18184	0.52	10.65	0.07322	0.7	10.73	0.08224	-0.41	11.85	0.15308	-0.52	11.79	0.08345	-0.45	11.83	0.08364	-1.02	11.38	0.00407	-0.02	11.88	1	0
	THC0290_N_0167	261251	261325	-1	Region	intra	new TR			-1.92	8.82	0.0035	-1.89	8.83	0.00129	-1.35	9.12	0.01076	-1.82	7.58	0.00244	0.51	9.19	0.17684	0.11	8.36	0.62555	0.48	8.55	0.12888	1.23	8.92	0.0412	-0.34	9.63	0.23121	-0.39	9.6	0.14168	-0.1	9.75	0.62398	-0.63	8.93	0.00929	-0.1	9.19	1	-0.09
	THC0290_0212	261326	261682	-1	CDS		Protein of unknown function MmcQ	THC0290_v2_0221		-2.17	8.56	0.00262	-2.29	8.5	0.00107	-1.27	8.92	0.01119	-1.4	7.96	0.0014	0.42	8.97	0.13498	-0.26	7.89	0.49507	-0.64	7.7	0.2005	-0.77	7.64	0.15064	-0.17	9.47	0.53854	-0.37	9.37	0.19704	-0.11	9.51	0.59804	-0.31	8.83	0.03901	0.08	9.03	1	-0.01
	THC0290_0213	261688	262440	-1	CDS		Probable arylformamidase	THC0290_v2_0222		-1.99	9.12	0.00302	-2.42	8.91	0.001	-1.35	9.3	0.01187	-0.98	8.81	0.00237	0.51	9.53	0.1638	-0.02	7.99	0.96661	0.58	8.29	0.40405	-0.17	7.91	0.61843	0.09	10.02	0.81272	-0.11	9.92	0.75593	-0.87	9.54	0.04757	-0.55	9.36	0.01096	0.03	9.65	1	0.15
	THC0290_0214	262521	263654	-1	CDS		Probable coproporphyrinogen oxidase	THC0290_v2_0223		-2.42	8.68	0.0022	-3.67	8.05	0.00103	-1.47	9.13	0.01003	-1.57	7.3	0.00246	0.3	9.09	0.30415	-0.17	6.58	0.80298	0.6	6.96	0.12372	-1.65	5.84	0.22831	0.03	9.89	0.92563	0.11	9.92	0.74498	-1.04	9.35	0.02267	-0.47	8.99	0.02476	0.01	9.24	1	0.04
ruvC	THC0290_0215	263657	264211	-1	CDS		Crossover junction endoribonuclease	THC0290_v2_0224	ruvC	-0.98	9.99	0.00629	-0.29	10.33	0.13578	-0.98	9.91	0.01611	-1.91	9.34	0.00078	0.22	10.14	0.36672	1.08	10.12	0.13998	1.45	10.3	0.07322	1.23	10.19	0.13501	0.35	10.58	0.25853	0.38	10.59	0.23817	-0.65	10.07	0.05208	-0.53	9.96	0.01735	0.03	10.23	1	0.05
	THC0290_N_0168	264212	264278	-1	Region	5prime	new TR			-0.6	9.56	0.01849	0.53	10.12	0.08195	-0.82	9.51	0.02712	-2.36	9.14	0.00135	0.22	9.58	0.44097	1.17	10.17	0.08385	1.42	10.3	0.03674	0.56	9.87	0.20405	0.24	10.04	0.43216	0.23	10.04	0.47375	-0.78	9.54	0.04054	-0.2	9.51	0.27774	0.24	9.73	1	0.13
	THC0290_0216	264266	265192	1	CDS		Probable transmembrane protein of unknown function	THC0290_v2_0225		-1.02	7.17	0.00478	-0.94	7.21	0.00498	-1.04	7	0.0094	2.09	6.97	0.00144	0.12	6.84	0.63835	0.27	5.47	0.84087	0.65	5.66	0.25569	-0.72	4.97	0.38235	0.8	7.92	0.07751	0.75	7.89	0.04417	-0.24	7.4	0.19704	-0.16	7	0.27702	0.02	7.1	1	-0.03
	THC0290_0217	265180	266289	1	CDS		Glycosyl transferase, group 2 family protein	THC0290_v2_0226		-1.05	7.28	0.00675	-2.47	6.57	0.00103	-1.04	7.42	0.00842	3.02	7.65	0.00053	0.04	7.3	0.90532	-0.74	5.13	0.40941	0.14	5.56	0.43921	-0.29	5.35	0.83545	0.7	8.28	0.19523	0.75	8.31	0.04966	-0.22	7.82	0.20233	-0.2	7.42	0.26383	-0.08	7.48	1	-0.05
	THC0290_0218	266397	266870	-1	CDS		Protein of unknown function	THC0290_v2_0227		-0.45	9.15	0.18457	-0.76	8.99	0.00732	-1.17	8.82	0.0483	-1.21	9.48	0.00639	-0.1	9.13	0.70993	0.81	9.07	0.21118	1.57	9.45	0.04179	0.66	9	0.18871	-0.17	9.32	0.73466	-0.36	9.23	0.49479	-0.57	9.12	0.2465	-0.44	9.26	0.05709	-0.05	9.45	1	-0.31
	THC0290_N_0169	266572	266801	1	Region	indep	new TR			-0.47	8.22	0.09096	1.11	9.02	0.01212	-0.54	8.09	0.02368	2.05	8.48	0.00055	-0.01	7.97	0.99185	0.84	9.83	0.25006	1.86	10.34	0.04059	2.63	10.73	0.05781	0.49	8.6	0.16863	0.57	8.64	0.06841	-0.14	8.28	0.40635	0.28	8	0.13228	0.2	7.96	1	-0.4
	THC0290_0219	266940	267446	1	CDS		Hypothetical protein	THC0290_v2_0228		-0.47	8.09	0.15477	1.05	8.85	0.02185	-0.51	7.86	0.02963	1.95	8.31	0.00132	0.02	7.67	0.9526	0.63	9.43	0.308	1.24	9.73	0.10085	1.77	9.99	0.14067	0.34	8.28	0.23572	0.16	8.19	0.4774	-0.23	8	0.24349	0.28	7.72	0.05371	0.21	7.68	1	-0.01
	THC0290_N_0170	267422	267648	-1	Region	3prime	new TR			0.84	9.83	0.00608	1.18	10	0.00715	0.13	9.86	0.5783	-0.69	11.03	0.03133	0.08	9.55	0.72781	0.07	10.94	0.84175	0.14	10.98	0.71726	0.57	11.19	0.20788	-0.63	9.48	0.1148	-0.76	9.41	0.08504	0.55	10.07	0.24036	0.73	9.96	0.00619	-0.1	9.55	1	0.12
	THC0290_0220	267649	268050	-1	CDS		Hypothetical protein	THC0290_v2_0229		1.3	9.96	0.0053	1.41	10.02	0.00878	0.8	9.73	0.01472	-1.52	10.91	0.00175	-0.06	9.47	0.82468	-0.48	11.33	0.14219	-0.45	11.35	0.18677	-0.09	11.53	0.76813	-0.71	8.97	0.07457	-0.61	9.03	0.06984	1.15	9.91	0.01652	0.97	9.95	0.0042	-0.04	9.45	1	-0.01
	THC0290_N_0171	268051	268199	-1	Region	intra	new TR			1.52	11.4	0.00318	1.7	11.49	0.00554	0.88	11	0.0204	-2.05	11.98	0.0009	-0.17	11.02	0.49612	-0.38	12.5	0.4307	-0.34	12.52	0.25811	-0.18	12.6	0.68292	-0.53	10.29	0.20021	-0.58	10.27	0.15246	1.17	11.14	0.03369	0.99	11.49	0.01048	0.08	11.03	1	0.09
	THC0290_0221	268200	268898	-1	CDS		Protein of unknown function precursor	THC0290_v2_0230		1.47	11.7	0.00338	1.81	11.87	0.00228	0.78	11.27	0.04408	-2.02	12.92	0.00165	-0.05	11.46	0.90988	-0.36	13.03	0.49843	-0.45	12.99	0.16002	-0.22	13.1	0.50159	-0.41	10.67	0.29083	-0.57	10.59	0.15664	1.2	11.48	0.05614	0.94	11.85	0.00402	0.03	11.39	1	0.03
	THC0290_0222	268913	269659	-1	CDS		Protein of unknown function precursor	THC0290_v2_0231		1.69	10.76	0.0041	2.63	11.23	0.00104	0.63	10.3	0.02112	-1.58	12.03	0.002	0.1	10.45	0.58758	0.31	13.07	0.60652	0.07	12.95	0.79592	0.5	13.16	0.18452	-0.63	9.67	0.08094	-0.75	9.61	0.06194	1.23	10.6	0.02251	1.26	10.93	0.0028	0	10.3	1	0.01
ileS	THC0290_0223	269844	273245	1	CDS		Isoleucine--tRNA ligase	THC0290_v2_0232	ileS	-2.74	11.1	0.00152	-2.73	11.1	0.00096	-1.64	11.58	0.00822	0.57	10.37	0.00817	0.23	11.52	0.4265	-0.46	10.24	0.13657	-0.38	10.28	0.19688	0.43	10.68	0.30279	-0.07	12.37	0.79311	-0.29	12.26	0.21539	-0.95	11.93	0.01618	-0.64	11.73	0.00837	0.08	12.09	1	0.02
dksA	THC0290_0224	273252	273632	1	CDS		DnaK suppressor protein	THC0290_v2_0233	dksA	-1.86	11.89	0.00319	-1.67	11.99	0.00176	-1.16	12.35	0.01003	0.17	11.7	0.14768	0.3	12.3	0.22471	-0.31	11.69	0.36011	-0.16	11.76	0.54342	1.08	12.38	0.11675	-0.32	12.77	0.26946	-0.19	12.84	0.44814	-0.33	12.77	0.27328	0.05	12.49	0.79315	0.06	12.49	1	-0.01
	THC0290_N_0172	273673	273853	1	Region	5prime	new TR			-1.56	6.64	0.006	-1.5	6.67	0.00724	-1.51	6.85	0.00839	1.58	6.81	0.00066	0.11	6.58	0.8038	-0.27	7.67	0.33103	-0.95	7.33	0.12972	-2.64	6.48	0.15354	0.83	8.02	0.0816	1.23	8.22	0.03187	0.07	7.64	0.73659	-0.29	7.24	0.0538	-0.12	7.32	1	-0.18
lspA	THC0290_0225	273869	274462	1	CDS		Signal peptidase II	THC0290_v2_0235	lspA	0.23	10.34	0.53471	1.16	10.8	0.00727	-0.52	10.07	0.11296	0.28	10.4	0.03638	-0.06	9.78	0.87765	0.47	10.94	0.13753	0.36	10.89	0.16131	0.61	11.01	0.11304	-0.05	10.31	0.91444	0.09	10.38	0.82434	0.05	10.36	0.89568	0.2	10.06	0.19503	-0.03	9.94	1	-0.17
	THC0290_N_0173	274351	274462	-1	Region	3prime	new TR			1.01	5.99	0.0227	1.18	6.08	0.00582	0.86	5.99	0.02701	-0.31	6.32	0.78652	-0.03	6.1	0.91703	0.21	6.06	0.92655	-0.44	5.74	0.87867	2.83	7.37	0.31516	-0.46	5.33	0.45774	-0.44	5.34	0.22059	0.12	5.62	0.77799	-0.07	5.87	0.80895	-0.18	5.82	1	0.27
ygfA	THC0290_0226	274463	275026	-1	CDS		5-formyltetrahydrofolate cyclo-ligase	THC0290_v2_0236	ygfA	0.58	8.69	0.01286	0.75	8.77	0.00642	0.16	8.27	0.37058	-1.61	8	0.01862	0.09	8.67	0.61445	0.98	9.17	0.10704	1.16	9.26	0.06066	1.56	9.46	0.09851	-0.22	8.07	0.51903	-0.22	8.07	0.38553	-0.11	8.13	0.5979	0.07	8.36	0.59771	-0.08	8.28	1	0.08
	THC0290_N_0174	274463	274834	1	Region	3prime	new TR			-0.06	8.7	0.68885	1.02	9.23	0.00339	-0.74	8.84	0.02164	1.94	9.21	0.00158	-0.09	8.12	0.61443	0.51	9.35	0.29872	0.07	9.13	0.88921	0.82	9.5	0.1373	-0.48	8.96	0.17258	-0.41	9	0.17039	-0.1	9.16	0.63019	0.27	8.58	0.18766	-0.08	8.4	1	-0.19
	THC0290_0227	275072	276049	-1	CDS		Protein of unknown function	THC0290_v2_0237		0.06	9.31	0.68093	0.13	9.34	0.52313	-0.15	9.03	0.34034	-1.37	8.92	0.03953	0.29	9.54	0.23472	0.29	9.26	0.37945	0.57	9.4	0.07372	0.98	9.6	0.20989	0.06	9.14	0.87788	-0.23	8.99	0.3195	-0.05	9.08	0.79588	-0.03	9.15	0.83311	0.03	9.18	1	0.01
uvrC	THC0290_0228	276133	277932	1	CDS		Excinuclease ABC, C subunit	THC0290_v2_0238	uvrC	0.54	9.74	0.02013	0.48	9.71	0.02185	0.12	9.55	0.59548	-2.1	8.73	0.01142	-0.15	9.4	0.42446	-0.37	8.71	0.30731	-0.4	8.7	0.42251	0.52	9.16	0.16252	-0.51	9.23	0.14964	-0.72	9.13	0.07866	-0.19	9.39	0.49077	0.14	9.52	0.25934	-0.07	9.42	1	0.13
	THC0290_0229	277945	280254	1	CDS		Probable esterase of the alpha-beta hydrolase superfamily	THC0290_v2_0239		0.75	9.99	0.01267	1.12	10.17	0.00474	0.76	9.99	0.01194	-2.2	8.94	0.00152	-0.21	9.72	0.2819	-0.05	9.54	0.83757	-0.31	9.41	0.28858	0.27	9.7	0.42436	-0.14	9.54	0.66239	-0.35	9.43	0.17233	-0.15	9.53	0.36686	0.46	9.97	0.01498	0.01	9.74	1	0.01
	THC0290_0230	280355	281833	1	CDS		Probable amino acid-transporting permease	THC0290_v2_0240		-0.37	12.35	0.18991	-0.99	12.04	0.02421	0.01	12.43	0.94498	0.09	12.41	0.43224	-0.04	12.76	0.86672	-0.02	11.34	0.95937	-0.39	11.16	0.23008	-0.64	11.04	0.12332	0.15	12.5	0.59002	0.01	12.43	0.98162	0.68	12.77	0.02267	-0.33	12.49	0.04766	0.06	12.69	1	-0.04
	THC0290_N_0176	281963	282093	1	Region	5prime	new TR			0.75	11.26	0.05259	1.1	11.44	0.00248	0.31	10.91	0.23042	-0.04	10.91	0.82646	0.09	11.13	0.67853	0.52	13.82	0.81458	-0.75	13.18	0.35735	0.89	14	0.55693	0.35	10.93	0.24582	0.16	10.83	0.5602	0.54	11.02	0.15103	0.72	11.43	0.00761	-0.05	11.05	1	-0.1
hmgA	THC0290_0231	282094	283251	1	CDS		Homogentisate 1,2-dioxygenase	THC0290_v2_0241	hmgA	0.87	12.43	0.01404	0.84	12.41	0.01296	0.47	12.1	0.23823	-0.6	12.33	0.0244	-0.18	12.39	0.48243	-0.3	12.48	0.48661	-0.31	12.48	0.27773	-0.5	12.39	0.22795	0.38	12.06	0.40603	0.14	11.93	0.77335	0.41	12.07	0.46589	0.59	12.5	0.01562	0.03	12.22	1	0.02
	THC0290_N_0177	283252	283453	1	Region	intra	new TR			0.67	11.72	0.02465	0.85	11.81	0.00501	0.58	11.58	0.15419	0.09	11.63	0.49943	0	11.58	0.99835	-0.47	11.81	0.2629	-0.68	11.71	0.04692	-1.11	11.49	0.10096	0.42	11.5	0.35575	0.29	11.43	0.49789	0.66	11.62	0.20212	0.26	11.57	0.16767	0.09	11.48	1	-0.03
hppD	THC0290_0232	283454	284614	1	CDS		4-hydroxyphenylpyruvate dioxygenase	THC0290_v2_0242	hppD	0.8	12.65	0.04057	0.64	12.57	0.00998	0.53	12.41	0.06595	0.07	12.6	0.6544	0	12.54	1	-0.7	12.29	0.26012	-0.71	12.28	0.08823	-1.19	12.04	0.04458	0.27	12.28	0.38144	0.26	12.27	0.38455	0.48	12.38	0.17246	0	12.42	0.99218	-0.07	12.39	1	-0.16
	THC0290_N_0178	284615	284739	1	Region	intra	new TR			1.59	13.27	0.0063	1.25	13.1	0.00471	0.97	13.09	0.01216	0.1	13.31	0.38511	-0.33	12.94	0.16404	-0.68	12.75	0.34643	-0.68	12.75	0.22465	-1.32	12.43	0.28165	-0.23	12.49	0.41755	-0.1	12.56	0.72948	0.35	12.78	0.13554	-0.04	12.85	0.77059	-0.01	12.87	1	-0.29
	THC0290_N_0179	284741	284837	1	Region	indep	new TR			1	10.52	0.25958	2.67	11.36	0.02377	-0.27	10.26	0.28626	0.33	10.31	0.08371	-0.14	9.58	0.62055	1.79	13.07	0.29835	0.98	12.67	0.47414	1.82	13.09	0.33246	0.04	10.41	0.93171	0.26	10.52	0.43457	-0.11	10.33	0.72797	-0.3	10.08	0.16158	0.05	10.26	1	-1.24
	THC0290_0233	284910	285680	1	CDS		Protein of unknown function precursor	THC0290_v2_0243		0.32	11.02	0.10092	0.2	10.95	0.24454	0.23	10.87	0.16762	1.02	11.82	0.00287	0.05	11.36	0.85155	0.11	10.83	0.6382	0.44	11	0.09643	0.99	11.27	0.12359	-0.14	10.69	0.66259	-0.25	10.64	0.29938	1.22	11.37	0.01015	-0.28	10.66	0.0577	0.18	10.89	1	0.18
	THC0290_0234	285682	286608	1	CDS		Tryptophan 2,3-dioxygenase	THC0290_v2_0244		-0.02	11.72	0.90898	-1.11	11.17	0.0042	-0.03	11.82	0.84671	1.19	12.55	0.00335	0.02	12.16	0.9271	-0.15	10.38	0.58026	0.12	10.51	0.54518	0.65	10.78	0.22539	-0.12	11.77	0.59662	-0.29	11.69	0.27105	0.71	12.19	0.02598	-0.76	11.62	0.00555	-0.11	11.95	1	0.15
	THC0290_0235	286622	287854	1	CDS		Probable M23/M37 family peptidase	THC0290_v2_0245		-0.24	10.6	0.19599	-0.39	10.52	0.05593	-0.16	10.73	0.30585	2.21	11.32	0.00055	0	10.89	0.99835	0.81	10.43	0.08385	1.16	10.61	0.03576	1.39	10.72	0.07568	-0.39	10.62	0.1704	-0.46	10.58	0.1005	0.55	11.09	0.03648	-0.12	10.57	0.32468	0.02	10.64	1	-0.06
pth	THC0290_0236	287869	288498	1	CDS		Aminoacyl-tRNA hydrolase	THC0290_v2_0246	pth	-0.25	10.91	0.13641	-0.98	10.55	0.01	-0.04	11.05	0.83269	1.93	11.23	0.00064	0.19	11.15	0.32398	0.08	10.31	0.76313	0.15	10.34	0.49201	0.48	10.51	0.47495	-0.61	10.76	0.08543	-0.56	10.79	0.08457	0.42	11.28	0.11181	-0.07	10.77	0.58412	0.04	10.82	1	-0.01
fpp1	THC0290_0237	288547	291963	-1	CDS		Psychrophilic metalloprotease Fpp1 precursor	THC0290_v2_0247	fpp1	4.18	10.08	0.00207	4.48	10.23	0.00108	2.68	8.54	0.02392	-0.97	12.08	0.01149	-1.92	10.65	0.00483	-1.93	9.53	0.09088	-0.66	10.17	0.14248	-0.36	10.32	0.34679	0.87	7.64	0.36645	1.29	7.85	0.16202	-3.21	5.6	0.0207	0.28	11	0.29164	0.02	10.87	1	0.09
	THC0290_N_0181	292028	292069	-1	Region	3prime	new TR			1.64	4.71	0.00883	3.01	5.4	0.00102	0.77	4.28	0.06414	-1.33	4.52	0.00094	-0.78	4.52	0.03078	-0.44	4.08	0.44817	-0.37	4.12	0.49089	-0.45	4.08	0.44818	-0.04	3.88	0.88418	0.52	4.15	0.28812	-0.03	3.88	0.84357	0.75	5.05	0.03357	-0.49	4.43	1	0.62
fpp2	THC0290_0238	292070	294898	-1	CDS		Psychrophilic metalloprotease Fpp2 precursor	THC0290_v2_0248	fpp2	1.88	12.51	0.00395	1.92	12.52	0.00196	0.73	11.57	0.08239	-1.86	14.21	0.00056	-0.84	13.53	0.02718	-0.82	12.57	0.12628	-0.68	12.63	0.05111	-0.83	12.56	0.12402	-0.23	11.09	0.59477	-0.34	11.03	0.42002	-4.77	8.81	0.00575	-0.76	12.42	0.0081	0.18	12.89	1	-0.13
ribF	THC0290_0239	295150	296082	1	CDS		Bifunctional riboflavin biosynthesis protein RibF : Riboflavin kinase and FMN adenylyltransferase	THC0290_v2_0249	ribF	-0.33	10.2	0.16649	0.02	10.38	0.87483	-0.38	10.14	0.07811	0.43	9.8	0.06108	0.26	9.97	0.22388	0.43	10.53	0.17455	0.3	10.46	0.19554	0.33	10.48	0.33729	-0.39	10.13	0.18215	-0.37	10.14	0.17675	-0.22	10.22	0.28299	0.15	10.28	0.31194	0.04	10.22	1	-0.14
	THC0290_N_0182	296083	296259	1	Region	intra	new TR			-0.6	9.97	0.02972	-0.06	10.24	0.74952	-0.22	10.27	0.30052	0.54	9.64	0.01626	0.19	9.99	0.37949	0.41	10.12	0.16677	-0.2	9.81	0.38241	-0.22	9.8	0.69534	-0.5	10.13	0.11814	-0.38	10.19	0.18538	-0.32	10.22	0.208	-0.03	10.25	0.83389	-0.12	10.21	1	-0.07
bioB	THC0290_0240	296279	297367	1	CDS		Biotin synthase	THC0290_v2_0250	bioB	-1.43	11.74	0.00541	-1.44	11.73	0.00179	-0.85	12.13	0.01563	-1.57	11.15	0.0027	0.19	12.19	0.32772	-0.09	10.51	0.72047	-0.21	10.45	0.33659	-0.08	10.52	0.8149	0.08	12.59	0.79392	0.08	12.59	0.81089	-0.9	12.1	0.02486	-0.87	11.8	0.00659	-0.07	12.21	1	-0.03
	THC0290_0241	297417	297623	-1	CDS		Biotin synthase	NA		1.03	12.16	0.02039	1.61	12.45	0.00528	-0.09	11.82	0.78916	-1.28	11.96	0.00149	-0.32	12.36	0.33136	0.43	13.43	0.43613	0.58	13.51	0.11821	0.59	13.51	0.20577	-0.05	11.84	0.89751	-0.21	11.76	0.5723	0.19	11.96	0.59716	-0.24	11.77	0.1295	0.19	11.99	1	-0.03
	THC0290_N_0184	297507	297566	1	Region	indep	new TR			-0.25	14.89	0.10389	-0.05	14.99	0.8534	-0.2	14.94	0.38903	0.88	14.87	0.0035	-0.13	14.73	0.48099	-0.15	15.44	0.85987	0.25	15.63	0.61109	0.22	15.62	0.68548	0.13	15.1	0.71347	0.04	15.05	0.91722	0.05	15.06	0.92337	0.14	14.99	0.37414	-0.16	14.84	1	0.04
	THC0290_tRNA_0005	297803	297876	-1	tRNA		transfer RNA-Met			2.45	5.55	0.05589	6.19	7.42	0.00284	-0.66	4.54	0.14	0.64	7.38	0.43286	0.07	4.56	0.89148	2.32	10.52	0.087	2.73	10.72	0.0637	2.23	10.47	0.20788	1.26	5.5	0.08109	1.8	5.77	0.05077	-0.61	4.56	0.15157	0.24	5.82	0.69518	-0.59	5.41	1	-0.51
	THC0290_N_0185	297877	297936	-1	Region	5prime	new TR			2.38	9.77	0.00587	3.68	10.42	0.00291	0.9	9.28	0.01097	-0.52	8.93	0.066	-0.31	9.51	0.24897	0.9	12.33	0.2226	1.01	12.39	0.1352	1.23	12.5	0.17587	0.24	8.95	0.36216	0.2	8.93	0.4194	0.86	9.26	0.01656	1.4	9.89	0.0059	-0.09	9.14	1	-1.15
	THC0290_0242	297963	298367	-1	CDS		Probable lyase	THC0290_v2_0252		2.07	10.14	0.00684	2.9	10.56	0.00378	0.71	9.56	0.02431	-0.83	10.84	0.02778	-0.15	10	0.59265	1.33	12.77	0.14051	1.28	12.74	0.08253	1.6	12.9	0.08326	0.03	9.22	0.91817	0.07	9.24	0.81935	0.41	9.41	0.13224	1.33	10.28	0.00609	-0.09	9.57	1	-0.12
rbfA	THC0290_0243	298577	298969	1	CDS		Ribosome-binding factor A	THC0290_v2_0253	rbfA	0.99	11.63	0.07884	2.4	12.33	0.01015	0.18	11.01	0.35552	1.32	11.97	0.00605	-0.24	10.8	0.34608	1.37	13.27	0.19278	1.98	13.57	0.1266	2.77	13.97	0.03642	0.58	11.21	0.08109	0.54	11.19	0.12388	0.15	11	0.3392	1.36	11.38	0.00371	0.14	10.77	1	-0.43
	THC0290_0244	298971	300170	1	CDS		Probable ABC-type transport system, permease component	THC0290_v2_0254		0.49	11.38	0.01952	1.27	11.77	0.00187	-0.11	11.16	0.54872	1.86	12.16	0.00056	-0.06	10.98	0.79806	0.34	12.33	0.29935	0.46	12.39	0.16384	1.2	12.76	0.07675	0.41	11.42	0.20434	0.37	11.4	0.18191	0.13	11.28	0.5261	0.99	11.39	0.00691	0.22	11	1	0.04
	THC0290_N_0186	300171	300903	1	Region	3prime	new TR			1.28	6.54	0.052	3.06	7.43	0.00272	0.29	6.18	0.27243	0.58	7.34	0.04835	-0.4	5.87	0.48243	0.6	8.55	0.52749	0.37	8.44	0.64717	1.72	9.11	0.12359	-0.22	5.92	0.64768	0	6.03	0.99687	0.17	6.11	0.54163	0.31	5.96	0.61517	-0.34	5.64	1	-0.65
queA	THC0290_0245	300280	301329	-1	CDS		S-adenosylmethionine:tRNA-ribosyltransferase- isomerase	THC0290_v2_0255	queA	0.15	12.93	0.48415	0.85	13.27	0.00618	-0.22	12.84	0.14456	1.31	13.11	0.00198	-0.06	12.53	0.73584	0.25	13.61	0.48566	1.15	14.06	0.03562	2.49	14.72	0.03602	0.11	13	0.64536	0.12	13.01	0.59458	-0.45	12.73	0.05286	-0.08	12.79	0.44961	-0.06	12.8	1	-0.09
	THC0290_N_0187	301330	301388	-1	Region	5prime	new TR			0.21	12.24	0.51294	1.18	12.73	0.04803	-0.1	12.16	0.46132	1.39	12.27	0.00132	0.01	11.76	0.95303	0.46	13.21	0.31614	1.9	13.93	0.03674	3.12	14.54	0.02773	0.12	12.28	0.58778	0.24	12.33	0.32621	-0.45	11.99	0.04876	0	12.08	0.98791	0.03	12.09	1	-0.1
aroA	THC0290_0246	301503	302732	-1	CDS		3-phosphoshikimate 1-carboxyvinyltransferase	THC0290_v2_0256	aroA	-0.89	9.64	0.00766	-2.48	8.85	0.00224	-0.36	9.83	0.26465	1.07	9.38	0.00204	0.13	9.69	0.48944	-2.57	6.76	0.19988	0.07	8.08	0.75104	-3.3	6.39	0.05411	0.37	10.2	0.37362	0.45	10.24	0.25497	-0.41	9.81	0.24726	-0.43	9.48	0.04627	0.01	9.7	1	0.18
	THC0290_0247	302777	303103	-1	CDS		MazG family protein	THC0290_v2_0257		-0.48	10.4	0.0437	-1.66	9.81	0.00327	-0.37	10.48	0.13095	0.74	10.34	0.00634	0.17	10.38	0.36672	-0.14	9.37	0.62321	0.13	9.5	0.68536	0.68	9.77	0.1625	0.33	10.83	0.34859	0.35	10.84	0.22943	-0.53	10.4	0.11678	-0.39	10.19	0.02941	0.01	10.39	1	0.11
	THC0290_N_0188	303104	303302	-1	Region	intra	new TR			-0.24	9.33	0.10593	-0.5	9.21	0.01935	0.01	9.33	0.9715	0.98	9.32	0.07811	-0.1	8.97	0.64496	1.65	11.37	0.55305	0.46	10.77	0.66718	1.51	11.3	0.35527	0.29	9.48	0.32919	0.25	9.45	0.33018	-0.47	9.09	0.05671	0.39	9.21	0.03344	-0.22	8.91	1	0.08
	THC0290_0248	303303	303749	-1	CDS		Protein of unknown function	THC0290_v2_0258		-0.15	9.32	0.32245	-0.58	9.1	0.02619	0.15	9.65	0.3998	0.84	9.18	0.00465	0.01	9.19	0.97576	-0.32	9.36	0.22028	-0.34	9.36	0.2005	-0.28	9.38	0.66267	-0.13	9.51	0.63122	-0.03	9.56	0.93122	-0.39	9.38	0.10292	0.61	9.47	0.00806	-0.07	9.13	1	0.12
	THC0290_0249	303781	304143	-1	CDS		Hypothetical protein Putative pseudogene	NA		-0.09	11.35	0.61701	-0.79	11	0.0791	0.13	11.54	0.59504	0.32	11.1	0.03348	-0.26	11.04	0.28682	-0.01	10.64	0.99662	-0.34	10.47	0.20153	0.39	10.84	0.55921	0.22	11.58	0.37117	-0.09	11.43	0.6945	-0.77	11.09	0.02151	0.44	11.24	0.03325	-0.04	10.99	1	0.06
	THC0290_N_0189	304144	304193	-1	Region	intra	new TR			1.16	8.92	0.01808	1.58	9.13	0.00837	0.94	8.8	0.02953	0.32	8.96	0.39803	-0.1	8.65	0.72252	0.03	8.54	0.97702	-0.29	8.38	0.50764	0.56	8.81	0.17302	-0.02	8.31	0.93835	-0.1	8.28	0.70284	0.24	8.44	0.27068	1.38	8.91	0.00402	0.33	8.38	1	-0.4
	THC0290_0250	304194	304376	-1	CDS		Hypothetical protein	THC0290_v2_0259		-0.23	9.58	0.32216	-0.24	9.57	0.13946	0.34	9.93	0.06833	0.34	9.17	0.08253	-0.19	9.33	0.38707	-0.43	9.21	0.43374	-0.24	9.3	0.3653	0.11	9.48	0.69538	0.06	9.79	0.83656	0.17	9.85	0.614	-0.45	9.54	0.10814	0.55	9.64	0.04271	-0.03	9.35	1	-0.03
	THC0290_N_0190	304377	304524	-1	Region	5prime	new TR			-0.04	9.66	0.91565	-0.28	9.54	0.09905	0.36	10.02	0.05885	0	9.24	0.99704	-0.02	9.47	0.97576	-0.92	9.21	0.087	-1	9.17	0.03649	0.68	10.01	0.14647	-0.01	9.83	0.96596	0.16	9.92	0.60465	-0.29	9.69	0.12946	0.63	9.76	0.02574	-0.13	9.39	1	0.11
	THC0290_0251	304650	305642	-1	CDS		Protein of unknown function	THC0290_v2_0261		-0.65	9.18	0.04772	-1.7	8.66	0.0042	0.03	9.65	0.85721	0	9.01	0.9773	0.21	9.06	0.36273	-0.16	8.39	0.65577	0.25	8.6	0.48302	1.55	9.25	0.0491	-0.07	9.59	0.78686	0.11	9.69	0.67861	-0.54	9.36	0.08691	0.58	9.47	0.0121	-0.03	9.16	1	-0.1
	THC0290_0252	305655	308825	-1	CDS		Probable type II endonuclease-methyltransferase fusion protein	THC0290_v2_0262		-0.52	9.7	0.02657	-1.68	9.12	0.00353	-0.06	9.92	0.64153	-0.95	10.15	0.00953	0.03	9.6	0.88964	-0.98	8.14	0.08875	-0.38	8.44	0.12492	-1.25	8.01	0.08474	0.15	10.03	0.53196	0.15	10.03	0.52539	-0.62	9.65	0.02639	0.56	9.87	0.02776	-0.07	9.55	1	0.13
dtd	THC0290_0253	308869	309321	-1	CDS		D-tyrosyl-tRNA(Tyr) deacylase	THC0290_v2_0263	dtd	-0.48	10.48	0.03589	-1.13	10.16	0.00624	-0.17	10.58	0.41271	-1.1	12.03	0.00187	0.13	10.41	0.48672	0.28	10.24	0.23838	-0.35	9.92	0.14959	-0.83	9.68	0.06759	0.39	10.86	0.23204	0.41	10.87	0.17377	-0.48	10.43	0.09803	0.44	10.59	0.02099	-0.03	10.35	1	0.13
	THC0290_N_0192	309322	309431	-1	Region	intra	new TR			-0.06	10.7	0.68004	0.26	10.86	0.1895	0	10.78	0.99655	-1.33	12.14	0.00355	-0.01	10.47	0.98714	0.17	11.35	0.65543	-0.41	11.06	0.25103	-0.95	10.79	0.22132	0.71	11.13	0.10698	0.41	10.98	0.21018	-0.5	10.53	0.20404	0.63	10.76	0.01285	0.02	10.46	1	0.19
rsgA	THC0290_0254	309432	310412	-1	CDS		Putative ribosome biogenesis GTPase RsgA	THC0290_v2_0264	rsgA	0.15	10.51	0.29116	0.77	10.82	0.01054	-0.14	10.42	0.54841	-1.21	12.55	0.00163	0.13	10.22	0.48325	0.33	11.76	0.20361	-0.44	11.38	0.11241	-0.66	11.27	0.12103	0.54	10.76	0.14618	0.56	10.78	0.15131	-0.51	10.24	0.09205	0.65	10.53	0.00817	0.11	10.26	1	0
	THC0290_N_0193	310413	310478	-1	Region	5prime	new TR			0.12	9.44	0.52468	1.36	10.06	0.01197	-0.06	9.33	0.64885	-1.07	11.64	0.00161	0.02	9.1	0.90254	0.63	11.16	0.12797	-0.16	10.76	0.53297	-0.64	10.52	0.60594	0.72	9.72	0.07185	0.64	9.68	0.05311	-0.39	9.17	0.06671	0.75	9.45	0.01835	0.08	9.11	1	-0.2
	THC0290_0255	310522	311604	-1	CDS		Putative phospho-2-dehydro-3-deoxyheptonate aldolase	THC0290_v2_0265		-0.05	9.88	0.79002	0.94	10.38	0.00548	-0.44	9.69	0.04461	-1.2	12.59	0.00205	0.09	9.83	0.70251	0.64	11.01	0.14855	-0.28	10.55	0.40789	-0.07	10.66	0.87103	0.82	10.32	0.06905	0.9	10.36	0.0374	-0.43	9.7	0.11341	0.45	10.12	0.10601	-0.21	9.78	1	0.01
	THC0290_N_0194	311635	311701	-1	Region	5prime	new TR			-1.56	8.03	0.01019	-2.32	7.65	0.04397	-1.75	8	0.01119	-0.76	11.98	0.00405	0.6	8.13	0.09868	1.64	10.18	0.10745	-1.1	8.81	0.1431	-2.06	8.33	0.58349	0.58	9.16	0.28584	0.39	9.07	0.34906	-0.29	8.73	0.48276	-0.24	8.05	0.09608	0.04	8.19	1	-0.02
aspC3	THC0290_0256	311724	312935	-1	CDS		Probable aspartate transaminase AspC3	THC0290_v2_0266	aspC3	-1.68	8.17	0.00339	-1.21	8.4	0.00393	-1.95	8.21	0.00822	-0.12	11.66	0.26542	0.42	8.39	0.15152	1.5	10.07	0.1266	-1.35	8.64	0.23101	-0.96	8.84	0.21155	0.44	9.41	0.18177	0.16	9.26	0.46126	-0.48	8.94	0.1075	-0.73	8.23	0.00695	-0.12	8.53	1	0.26
pheA	THC0290_0257	312932	313768	-1	CDS		Prephenate dehydratase	THC0290_v2_0267	pheA	-1.2	8.04	0.01	-0.46	8.41	0.12782	-1.63	7.89	0.00839	0.38	10.88	0.02551	0.52	8.16	0.06799	1.63	10.34	0.10192	-1.69	8.68	0.06272	-2.83	8.11	0.08174	0.37	8.89	0.27496	0.09	8.75	0.75394	-0.3	8.56	0.19234	-0.94	7.68	0.00698	-0.05	8.13	1	0.09
	THC0290_N_0195	313769	313939	-1	Region	5prime	new TR			0.88	8.19	0.05597	2.18	8.84	0.04995	0.39	8.06	0.19508	-1.13	8.07	0.00349	0.02	8.26	0.94555	1.98	10.92	0.08303	2.04	10.95	0.05588	1.92	10.89	0.0493	-0.4	7.66	0.28123	-0.72	7.5	0.12317	-0.94	7.39	0.06394	0	7.82	0.99332	0.19	7.91	1	-0.57
gldA	THC0290_0258	314052	314948	1	CDS		Gliding motility protein GldA	THC0290_v2_0268	gldA	-0.3	10.27	0.10593	0.23	10.53	0.18863	-0.03	10.53	0.86306	-0.6	9.54	0.00898	-0.03	10.02	0.88811	-0.03	9.78	0.91595	-0.16	9.72	0.50425	0.19	9.9	0.49781	-0.48	10.31	0.14854	-0.56	10.27	0.09673	-0.76	10.17	0.02818	-0.65	9.95	0.01094	0	10.27	1	0.03
	THC0290_0259	314955	315767	1	CDS		Probable transcriptional regulator, AraC family	THC0290_v2_0269		-0.98	8.67	0.00673	-1.25	8.53	0.00923	-0.46	9.1	0.0405	1.19	8.22	0.0046	0.02	8.46	0.93812	-0.84	6.81	0.08417	-1.75	6.36	0.1104	-1.99	6.24	0.21395	-0.89	8.89	0.0557	-0.95	8.86	0.04397	-0.81	8.93	0.01791	-0.51	8.65	0.0135	-0.07	8.87	1	0
	THC0290_N_0196	315768	315824	1	Region	intra	new TR			-1.01	7.47	0.00441	-1.57	7.19	0.00259	-0.26	7.82	0.11184	1.86	7.26	0.00135	-0.21	7.36	0.387	0.74	5.38	0.42188	1.81	5.91	0.1829	-0.07	4.97	0.94587	-0.75	7.57	0.06576	-1.08	7.41	0.03619	-0.61	7.65	0.02803	-0.16	7.43	0.33781	0.09	7.55	1	0.06
	THC0290_0260	315825	316994	1	CDS		Protein of unknown function	THC0290_v2_0270		-0.35	8.9	0.05122	0.44	9.29	0.07459	-0.09	9.12	0.57097	2.28	9.65	0.00055	-0.07	8.68	0.71042	0.32	9.78	0.38715	0.91	10.07	0.03787	1.31	10.27	0.04853	-0.47	8.92	0.12334	-0.32	9	0.20674	0.02	9.17	0.92337	0.45	9.07	0.03807	0.06	8.87	1	-0.06
	THC0290_N_0197	316995	317307	1	Region	3prime	new TR			0.09	9.54	0.53979	0.96	9.97	0.02116	0.17	9.73	0.40984	2.14	10.21	0.00055	-0.16	9.29	0.50287	0.81	10.46	0.14988	0.81	10.46	0.06208	1.86	10.99	0.04351	-0.6	9.34	0.1148	-0.67	9.3	0.09962	-0.05	9.61	0.85005	0.48	9.57	0.03489	0.13	9.39	1	-0.03
	THC0290_0261	317564	318664	-1	CDS		Homoserine dehydrogenase	THC0290_v2_0271		-1.38	6.09	0.0337	-1.48	6.04	0.00331	-0.95	6.64	0.01187	-1.95	9.79	0.0006	0.06	5.76	0.87995	1.08	6.77	0.10215	0.79	6.62	0.58397	1.9	7.18	0.03902	0.18	7.21	0.51725	0.06	7.15	0.82141	-1.16	6.54	0.012	0.2	6.73	0.12081	-0.06	6.6	1	-0.05
metX	THC0290_0262	318651	319652	-1	CDS		Homoserine O-acetyltransferase	THC0290_v2_0272	metX	-1.77	5.86	0.0179	-1.99	5.75	0.00417	-0.81	6.62	0.02758	-2.65	9.55	0.00131	-0.16	5.71	0.52865	-0.77	4.88	0.63894	1.9	6.21	0.26354	3.31	6.92	0.1403	0.28	7.16	0.56621	0.07	7.06	0.83536	-2.06	5.99	0.0221	-0.27	6.48	0.06805	0.09	6.66	1	-0.2
metY	THC0290_0263	319731	321023	-1	CDS		Probable O-acetylhomoserine aminocarboxypropyltransferase	THC0290_v2_0273	metY	-1.74	6.2	0.0035	-2.96	5.59	0.00096	-0.64	6.96	0.02718	-2.19	10.5	0.00084	-0.21	6.16	0.61338	-0.9	5.4	0.08335	2.35	7.02	0.02834	2.97	7.33	0.05365	0.39	7.48	0.3348	0.31	7.44	0.22934	-1.67	6.45	0.00755	0.05	7.17	0.81473	-0.03	7.13	1	0.07
	THC0290_N_0198	321293	321392	-1	Region	indep	new TR			-0.14	5.03	0.8737	0.17	5.18	0.85496	0.27	6.01	0.66529	-4.08	6.89	0.00441	-0.06	4.43	0.83367	1.3	5.99	0.08318	3.53	7.1	0.02548	5.12	7.9	0.03973	-0.9	5.43	0.20526	-0.88	5.44	0.18862	-1.28	5.24	0.10175	-0.24	5.69	0.44755	0.21	5.92	1	-0.85
	THC0290_N_0199	321888	322029	-1	Region	indep	new TR			0.54	8.39	0.54667	1.96	9.1	0.0232	-1.59	8.54	0.00839	-0.05	8.88	0.82403	0.23	7.95	0.44691	0.3	10.13	0.80559	-0.32	9.82	0.34888	-0.15	9.9	0.92763	-1.12	8.77	0.05259	-0.9	8.88	0.17189	-1.3	8.68	0.01173	0.79	8.76	0.05093	0.3	8.52	1	-0.8
	THC0290_0264	322321	323505	1	CDS		Transposase IS91 family	THC0290_v2_0274		0.8	7.39	0.01131	1.81	7.89	0.02349	0.37	7.07	0.05588	-1.01	7.56	0.00758	0.17	7.69	0.38747	0.16	9.12	0.66547	0.08	9.07	0.80499	1.07	9.57	0.16593	-1.18	6.29	0.05144	-1.4	6.18	0.03187	1.1	7.43	0.01173	0.2	7.46	0.11334	-0.05	7.33	1	0.09
	THC0290_0265	323507	323950	1	CDS		Hypothetical protein	THC0290_v2_0275		0.92	7.07	0.00973	1.9	7.57	0.01043	0.53	6.87	0.05103	-0.36	7.14	0.16171	0.14	7.4	0.60025	0.24	8.84	0.57125	0.16	8.8	0.4349	0.57	9.01	0.36401	-1.54	5.83	0.03839	-1.5	5.85	0.03187	1.26	7.23	0.01459	0.18	7.09	0.25902	0.05	7.03	1	-0.12
	THC0290_N_0200	323909	323965	-1	Region	3prime	new TR			-0.53	6.88	0.01996	-0.61	6.84	0.01867	-0.5	7.16	0.06476	1.51	6.56	0.00215	0.33	7.2	0.33519	1.31	6.36	0.43705	-0.87	5.27	0.54232	-1.32	5.04	0.30203	-0.84	6.99	0.06547	-0.47	7.17	0.14089	-0.31	7.25	0.16392	-1.46	6.15	0.03618	0.16	6.96	1	-0.22
	THC0290_N_0201	323951	324107	1	Region	3prime	new TR			0.27	4.12	0.28269	-0.09	3.94	0.52762	0.02	3.93	0.91205	0.27	4.05	0.04369	0.07	3.93	0.69073	0.63	4.28	0.41459	1.05	4.5	0.37454	0.02	3.98	0.94496	0.01	3.92	0.96616	0.09	3.96	0.73197	0.29	4.06	0.19437	0.1	4.01	0.39241	0	3.96	1	-0.26
	THC0290_0266	323966	324199	-1	CDS		Transcriptional regulator, XRE family	THC0290_v2_0276		0.07	8.21	0.90382	0.41	8.38	0.35073	-0.8	8.17	0.02073	1.56	8.23	0.00233	0.41	8.14	0.13311	1.72	8.92	0.08303	2.25	9.18	0.02861	2.41	9.26	0.08098	-0.69	8.23	0.08109	-0.35	8.4	0.22641	-0.4	8.37	0.1691	-1.15	7.47	0.00965	0.3	8.2	1	-0.64
	THC0290_0267	324293	325300	1	CDS		Hypothetical protein precursor	THC0290_v2_0277		-0.64	5.01	0.17848	-0.26	5.2	0.66348	-0.92	5	0.03518	-0.03	4.51	0.82555	0.45	4.87	0.40409	1.59	6.13	0.18869	1.06	5.86	0.33556	2.98	6.83	0.03738	0.43	5.68	0.20622	0.73	5.82	0.07471	-0.88	5.02	0.10292	-0.39	4.88	0.26597	-0.13	5.01	1	-0.1
	THC0290_N_0202	325563	325621	1	Region	5prime	new TR			-0.02	9.69	0.91392	1.08	10.24	0.19146	-0.13	9.97	0.42751	-0.07	9.43	0.56632	0.25	9.66	0.41086	0.9	11.76	0.19909	1.19	11.9	0.23976	2.31	12.46	0.2103	-0.75	9.66	0.06576	-0.64	9.71	0.06359	-0.39	9.84	0.09976	0.59	10.31	0.01939	-0.01	10.01	1	-0.17
	THC0290_0268	325622	327997	1	CDS		Truncated Eco57I restriction-modification methylase family protein	THC0290_v2_0278		0.19	10.56	0.24878	1.13	11.03	0.05455	0.13	10.94	0.46642	-0.01	10.18	0.97426	0.26	10.48	0.33583	0.17	12.06	0.54322	-0.16	11.89	0.56396	-0.14	11.91	0.65716	-0.87	10.44	0.05676	-0.98	10.39	0.03619	-0.28	10.74	0.30957	0.65	11.17	0.01508	-0.03	10.83	1	-0.21
	THC0290_0269	328042	328353	1	CDS		Transposase IS3 family, OrfA	THC0290_v2_0279		-0.04	10.21	0.81601	0.88	10.68	0.0066	-0.25	10.18	0.29528	0.59	10.19	0.00568	0.26	10.08	0.21549	0.43	11.46	0.34767	0.49	11.49	0.07135	0.51	11.5	0.28842	-0.25	10.18	0.34314	-0.37	10.12	0.17288	-0.24	10.18	0.30632	0.07	10.16	0.56929	0.01	10.13	1	-0.17
	THC0290_0270	328404	329249	1	CDS		Transposase IS3 family, OrfB	THC0290_v2_0280		-0.1	9.82	0.51887	0.69	10.22	0.0121	-0.41	10	0.06422	0.83	10.19	0.00849	0.1	9.72	0.65425	0.19	10.98	0.3748	0.26	11.02	0.19499	0.67	11.22	0.13073	-0.21	10.1	0.43311	-0.19	10.11	0.445	-0.38	10.02	0.10789	0.01	9.81	0.95284	-0.01	9.8	1	-0.02
	THC0290_0271	329327	329941	1	CDS		Truncated Eco57I restriction-modification methylase family protein	THC0290_v2_0281		-0.76	7.55	0.00868	-0.03	7.91	0.86632	-0.55	8.04	0.07619	2.33	8.28	0.00066	0.13	7.49	0.65327	0.07	9.03	0.79296	-0.41	8.79	0.15397	-0.09	8.96	0.76042	-0.24	8.19	0.47169	-0.04	8.3	0.91177	-0.55	8.04	0.15928	-0.49	7.49	0.0277	-0.02	7.73	1	-0.02
	THC0290_0272	329944	330672	1	CDS		Hypothetical protein	THC0290_v2_0282		-1.04	6.63	0.00945	-1.69	6.3	0.12601	-0.75	6.95	0.02845	2.74	7.58	0.00053	0.09	6.24	0.6352	-0.26	7.7	0.48893	-0.51	7.58	0.32874	1.54	8.6	0.08267	-0.07	7.29	0.86046	-0.12	7.27	0.68253	-0.64	7.01	0.08835	-0.27	6.57	0.24757	0.03	6.72	1	-0.2
	THC0290_0273	330880	331149	1	CDS		Hypothetical protein	THC0290_v2_0283		0.41	5.37	0.15768	0.72	5.53	0.03677	0.08	5.41	0.59498	-0.23	4.89	0.17898	0.3	4.95	0.38707	-1.25	7	0.24848	0.44	7.84	0.77839	2.45	8.84	0.0511	-0.85	4.94	0.06905	-0.67	5.03	0.06189	2.24	6.49	0.00575	-0.07	4.91	0.90979	0.24	5.06	1	-0.03
	THC0290_0274	331155	332150	1	CDS		Hypothetical protein	THC0290_v2_0284		0.07	5.9	0.71608	0.35	6.04	0.26278	-0.07	5.91	0.69796	-1.04	4.99	0.00133	0.2	5.72	0.39662	-0.59	7.5	0.42721	0.23	7.91	0.71824	1.49	8.54	0.079	-0.73	5.58	0.13431	-0.59	5.65	0.34533	2.03	6.96	0.00575	0.11	5.52	0.66564	0.25	5.59	1	-0.16
	THC0290_tRNA_0006	332736	332812	-1	tRNA		transfer RNA-Asp			1.17	14.82	0.29437	1.91	15.19	0.05253	-0.21	14.59	0.31692	-0.96	14	0.08049	0.21	14.43	0.63842	1.56	15.56	0.19224	1.77	15.67	0.12557	1.86	15.71	0.11873	-0.43	14.48	0.19641	-0.37	14.51	0.30912	0.17	14.78	0.66494	-0.46	14.33	0.11587	0.07	14.59	1	-0.99
	THC0290_N_0205	332826	332898	-1	Region	5prime	new TR			1.58	8.93	0.11936	3.21	9.74	0.00217	0.53	8.36	0.02696	-1.01	8.24	0.05972	0.19	8.3	0.75365	1.49	11.82	0.50293	-0.81	10.67	0.30761	1.59	11.87	0.26769	-0.42	7.88	0.12989	-0.01	8.09	0.97994	0.88	8.54	0.01673	3.55	10.2	0.00356	-0.07	8.4	1	-0.37
	THC0290_0275	332899	333825	-1	CDS		Protein of unknown function	THC0290_v2_0285		1.15	11.42	0.03374	1.51	11.6	0.0017	0.16	10.87	0.62991	-1.93	10.37	0.0059	0.11	11.12	0.81614	0.66	11.42	0.19937	0.82	11.5	0.11308	1.28	11.74	0.07204	-0.01	10.78	0.98965	-0.27	10.65	0.4893	0.13	10.85	0.77929	3.43	13.06	0.00179	0.04	11.36	1	-0.07
	THC0290_0276	334046	334363	-1	CDS		Thioredoxin family protein	THC0290_v2_0286		1.04	13.55	0.04308	1.59	13.83	0.01583	0.05	13.41	0.7861	-1.71	12.15	0.00384	0.12	13.65	0.70578	1.22	15.32	0.10828	1.79	15.6	0.04118	2.4	15.9	0.03936	0.13	13.45	0.63157	0.31	13.54	0.36957	-0.44	13.17	0.10391	1.78	14.56	0.00216	0	13.67	1	-0.28
	THC0290_N_0207	334509	334577	-1	Region	3prime	new TR			-0.31	6.16	0.5793	0.27	6.45	0.30802	0.11	5.9	0.76785	-2.15	5.1	0.00055	0.25	6.08	0.39817	0.79	4.55	0.31137	1.91	5.11	0.14923	2.1	5.2	0.24509	1.93	6.81	0.04499	2.28	6.99	0.03187	-0.91	5.39	0.07637	0.37	5.85	0.15207	0.23	5.78	1	0.19
	THC0290_0277	334578	335498	-1	CDS		Protein of unknown function precursor, putative outer membrane protein	THC0290_v2_0287		0.29	14.53	0.20494	-1.2	13.79	0.00371	0.35	14.39	0.09691	-1.32	14.1	0.00121	-0.01	14.81	0.97768	-0.25	12.39	0.52109	-0.29	12.37	0.19006	-0.5	12.26	0.15248	0.59	14.51	0.08488	0.6	14.52	0.06202	-0.53	13.95	0.05193	-0.29	14.43	0.05082	-0.03	14.56	1	0.05
	THC0290_N_0208	335720	335801	-1	Region	3prime	new TR			-1.07	12.13	0.00609	-2.28	11.52	0.00191	-0.58	12.43	0.09177	-0.73	11.94	0.03124	0.23	12.53	0.45664	1.03	11.84	0.48904	-0.14	11.25	0.75076	0.27	11.46	0.71925	-0.04	12.69	0.91996	-0.22	12.61	0.52556	0.88	13.16	0.06452	-0.58	12.21	0.0095	0.03	12.51	1	0.36
	THC0290_0278	335802	336416	-1	CDS		Probable deoxynucleoside kinase	THC0290_v2_0288		-0.69	10.94	0.00921	-1.22	10.68	0.0025	-0.82	10.87	0.02051	-1.11	10.51	0.0075	0.36	11.09	0.15083	0.23	10.61	0.50197	0.54	10.77	0.22459	0.31	10.66	0.45348	-0.14	11.21	0.62055	-0.2	11.18	0.45299	0.83	11.69	0.02684	-0.59	10.67	0.01208	0.02	10.97	1	0.08
	THC0290_0279	336416	337207	-1	CDS		Hypothetical protein precursor	THC0290_v2_0289		-0.17	7.21	0.26946	0.64	7.62	0.01408	-0.17	7.34	0.44758	1.06	6.9	0.00178	0.12	7.1	0.55194	1.32	8.23	0.09679	1.14	8.14	0.08953	1.12	8.13	0.19842	0.38	7.62	0.24958	0.21	7.53	0.47469	-0.22	7.32	0.39718	-0.64	7.02	0.01496	-0.06	7.31	1	-0.2
	THC0290_0280	337415	337477	1	gene		Truncated protein N-terminal region	NA		0.32	5.51	0.12552	0.27	5.49	0.60881	-0.33	5.4	0.44709	1.46	5.36	0.02972	-0.01	5.33	0.98034	0.59	4.59	0.65571	2.44	5.51	0.111	0.7	4.64	0.56497	-0.29	5.42	0.42906	-0.02	5.56	0.98208	-0.46	5.34	0.21578	0.39	5.54	0.6885	0.77	5.73	1	-0.15
	THC0290_0281	337517	337570	1	gene		Truncated protein C-terminal region	NA		0.06	8.4	0.75743	1.32	9.03	0.00184	-0.48	8.24	0.03084	0.25	8.09	0.19326	0.11	8.13	0.72417	0.84	10.19	0.50857	1.82	10.68	0.13441	2.33	10.93	0.13463	-0.01	8.47	0.97511	-0.28	8.34	0.23602	-0.21	8.38	0.40883	0	8.03	0.98925	0.28	8.16	1	-0.19
	THC0290_0282	337611	338546	1	CDS		Probable outer membrane protein precursor	THC0290_v2_0290		-0.75	7.2	0.02333	-0.28	7.44	0.34964	-0.35	7.4	0.11404	0.32	6.35	0.03029	0.25	6.91	0.23472	0.67	7.1	0.27115	-2.8	5.36	0.02834	0.95	7.24	0.08919	-0.53	7.31	0.12442	-0.59	7.28	0.08459	-0.49	7.33	0.07922	-0.42	6.95	0.05194	0.01	7.17	1	-0.24
	THC0290_0283	338551	338808	1	gene		Fragment of hypothetical protein (part 1)	THC0290_v2_0291		-0.92	8.42	0.01097	-0.78	8.49	0.01734	-0.53	8.63	0.02431	-1.25	7.75	0.00245	0.09	8.45	0.69996	-0.96	7.37	0.19968	-0.73	7.48	0.05959	-0.75	7.47	0.48094	-0.35	8.72	0.18177	-0.41	8.69	0.20249	-0.83	8.48	0.01969	-0.31	8.4	0.06375	0.12	8.61	1	-0.21
	THC0290_0284	338926	340089	1	CDS		Transposase IS4 family	THC0290_v2_0292		1.27	14.86	0.00368	1.6	15.03	0.00159	0.47	14.33	0.05374	-0.18	14.53	0.28283	-0.32	14.69	0.37307	-0.22	15.32	0.47618	-0.54	15.16	0.09777	-0.94	14.96	0.11374	-0.29	13.95	0.31709	-0.33	13.93	0.21018	-0.03	14.08	0.90909	0.17	14.43	0.28154	-0.02	14.34	1	-0.05
	THC0290_0285	340049	340711	1	gene		Fragment of hypothetical protein (part 2)	THC0290_v2_0293		-0.96	8.39	0.00853	-0.62	8.56	0.02636	-0.67	8.63	0.0427	0.77	8.96	0.02468	0.09	8.28	0.75648	0.16	8.51	0.76797	0.25	8.56	0.51487	1.31	9.09	0.17755	-0.47	8.73	0.26831	-0.55	8.69	0.13029	-0.34	8.8	0.36081	0.15	8.69	0.47173	-0.04	8.6	1	-0.1
	THC0290_0286	340851	343562	1	CDS		Protein of unknown function precursor	THC0290_v2_0294		-1.1	5.75	0.00602	-2.08	5.27	0.00142	-0.85	6	0.01189	0.98	5.33	0.02934	0.19	5.49	0.40897	-0.15	4.99	0.84755	1.34	5.74	0.12871	0.46	5.3	0.66889	-0.63	6.12	0.06996	-0.45	6.21	0.12118	-1.11	5.88	0.01262	-0.46	5.4	0.04377	-0.27	5.5	1	0.07
	THC0290_N_0209	343627	343736	-1	Region	3prime	new TR			-0.74	6.06	0.0084	-0.34	6.26	0.06207	-0.52	6.49	0.03509	-1.19	5.82	0.26439	-0.44	5.78	0.30273	1.45	7.53	0.09504	0.97	7.29	0.11873	-2.9	5.36	0.03738	0.24	6.87	0.47169	0.23	6.87	0.33807	-0.44	6.53	0.07091	0.27	6.18	0.32082	0.14	6.12	1	-0.33
metK	THC0290_0287	343737	344987	-1	CDS		Methionine adenosyltransferase	THC0290_v2_0295	metK	-1.95	12.02	0.00304	-2.59	11.7	0.00103	-0.86	12.8	0.01196	-0.19	12.08	0.24696	-0.08	12.37	0.81647	0.43	12.1	0.28711	0.28	12.02	0.28548	-0.21	11.78	0.67885	0.21	13.34	0.41833	0.07	13.27	0.82288	-0.81	12.83	0.01945	-0.18	12.6	0.22602	0.01	12.7	1	-0.1
	THC0290_N_0210	344988	345117	-1	Region	5prime	new TR			-1.63	11.35	0.01033	-1.96	11.18	0.00277	-1.01	11.98	0.01609	0.16	11.1	0.4505	0.02	11.42	0.9737	1.24	12.24	0.08303	2.42	12.83	0.03074	1.22	12.23	0.04569	0.23	12.6	0.56033	0.17	12.57	0.60558	-1.01	11.98	0.02658	-0.24	11.79	0.07416	0.07	11.94	1	-0.26
	THC0290_miscRNA_0001	345053	345113	-1	misc_RNA		SAM-II long loop			-1.84	11.37	0.00353	-2.16	11.2	0.00164	-0.99	12.01	0.01287	-0.05	11.2	0.77445	0.06	11.48	0.88274	1.14	12.16	0.08303	2.31	12.75	0.02834	1.32	12.26	0.04758	0.32	12.66	0.31396	0.23	12.62	0.42428	-0.96	12.02	0.02118	-0.22	11.86	0.22081	0.01	11.97	1	-0.19
recO	THC0290_0288	345589	346305	-1	CDS		DNA repair protein RecO	THC0290_v2_0296	recO	-0.55	8.19	0.05197	-1.73	7.6	0.00203	-0.8	8.29	0.03309	0.01	7.48	0.99059	0.07	8.02	0.80315	-0.01	6.22	0.99359	0.27	6.36	0.43583	0.11	6.28	0.95614	-0.31	8.53	0.397	-0.39	8.5	0.31066	0.84	9.11	0.04728	-0.78	7.65	0.01801	0.01	8.04	1	-0.05
	THC0290_N_0211	346306	346363	-1	Region	intra	new TR			0.2	11.15	0.18781	0.18	11.14	0.3612	-0.58	10.95	0.02208	-0.64	10.59	0.0337	0.21	10.95	0.41457	0.05	10.9	0.84602	0.57	11.15	0.07661	1.02	11.38	0.09277	-0.1	11.18	0.67309	-0.33	11.07	0.19312	1.03	11.75	0.01407	-0.84	10.56	0.00462	-0.03	10.96	1	-0.07
	THC0290_0289	346364	348646	-1	CDS		Protein of unknown function precursor, putative immunoreactive 84 kDa antigen	THC0290_v2_0297		0.16	9.58	0.40517	0.35	9.68	0.07745	-0.38	9.41	0.07982	0.02	9.49	0.82251	0.21	9.42	0.34727	0.16	9.92	0.53098	0.38	10.03	0.30402	0.37	10.03	0.40792	0.02	9.62	0.93962	0	9.6	0.99336	1.25	10.23	0.01237	-0.76	8.9	0.00911	0.05	9.3	1	-0.12
gdhA	THC0290_0290	348775	350118	-1	CDS		Glutamate dehydrogenase (NADP+)	THC0290_v2_0298	gdhA	-0.2	14.35	0.26148	-0.91	13.99	0.00672	0.03	14.4	0.85828	-0.88	13.71	0.002	0	14.51	0.98932	-0.33	13.47	0.30026	-0.71	13.28	0.04885	-0.97	13.15	0.05276	0.07	14.42	0.78673	0.13	14.45	0.55605	-0.57	14.1	0.05046	-0.41	14.23	0.02169	0.06	14.46	1	0.13
	THC0290_0291	350310	351137	1	CDS		Protein of unknown function precursor	THC0290_v2_0300		0.74	10.89	0.00963	1.26	11.15	0.00402	0.45	10.75	0.09398	-0.06	11.45	0.51398	-0.1	11	0.70585	0.52	11.95	0.17782	0.28	11.83	0.22342	0.29	11.84	0.62942	0.05	10.56	0.87033	-0.06	10.5	0.87269	-0.02	10.52	0.95468	-0.99	10.38	0.0042	0.03	10.88	1	-0.12
	THC0290_N_0214	351138	351301	1	Region	3prime	new TR			1.41	11.39	0.00699	2.16	11.76	0.00113	0.7	11.07	0.11471	0.32	11.84	0.04087	-0.03	11.38	0.94857	0.35	12.52	0.26945	-0.4	12.15	0.25329	-0.83	11.94	0.21984	-0.13	10.66	0.77879	0.06	10.75	0.91165	0.27	10.85	0.58185	-1.96	10.15	0.00194	0.08	11.17	1	-0.3
	THC0290_0292	351317	352102	-1	CDS		Protein of unknown function	THC0290_v2_0301		-0.36	11.3	0.08312	-0.18	11.39	0.3142	-0.58	11.4	0.02131	-0.75	10.45	0.00416	0.14	11.04	0.49612	0.25	10.74	0.34492	1.14	11.18	0.04283	0.54	10.88	0.15496	-0.36	11.52	0.18215	-0.45	11.47	0.10475	-0.78	11.31	0.02014	3.29	13.01	0.00179	-0.09	11.32	1	0.16
	THC0290_0293	352207	353211	-1	CDS		Protein of unknown function precursor	THC0290_v2_0302		0.27	10.33	0.2521	-0.8	9.79	0.09104	0.39	10.05	0.05441	-2.46	9.32	0.00392	0.06	10.99	0.83367	0.41	10.22	0.14237	0.7	10.36	0.04429	0.71	10.37	0.20187	0.13	9.92	0.71986	0.11	9.91	0.72257	0.44	10.08	0.05444	-0.4	10.3	0.03164	-0.03	10.49	1	0.15
aspS	THC0290_0294	353314	355065	1	CDS		Aspartate--tRNA ligase	THC0290_v2_0303	aspS	-1.61	11.82	0.00445	-1	12.13	0.00382	-0.55	12.34	0.07736	-0.25	11.21	0.05681	-0.04	11.99	0.86672	-0.43	10.78	0.14247	-0.53	10.73	0.0776	-0.43	10.78	0.35736	0.17	12.7	0.60081	0.09	12.66	0.80703	-0.95	12.14	0.03234	-0.43	12.16	0.03859	0.08	12.42	1	0.15
	THC0290_0295	355170	355370	1	CDS		Probable cold shock protein	THC0290_v2_0304		0.21	14.99	0.70578	0.04	14.91	0.9348	-0.07	14.93	0.7519	-1.33	13.3	0.00212	0.27	15.29	0.58243	0.75	14.3	0.43516	1.13	14.49	0.12372	0.75	14.3	0.33758	0.16	15.04	0.6036	0.3	15.11	0.49296	-0.42	14.75	0.14366	-0.65	14.79	0.00709	0.35	15.29	1	-0.17
	THC0290_N_0216	355371	355427	1	Region	3prime	new TR			-0.17	8.7	0.70455	1.52	9.54	0.01378	-0.4	8.49	0.08881	-2.03	6.85	0.00095	1.16	9.04	0.01969	1.56	9.8	0.08303	2.56	10.31	0.02749	1.34	9.69	0.04095	0.78	9.08	0.06905	0.71	9.05	0.10214	-1.37	8.01	0.01404	0.01	8.42	0.96477	0.71	8.77	1	-0.2
	THC0290_N_0217	355417	355516	-1	Region	3prime	new TR			1.29	9.04	0.00339	2.23	9.5	0.0042	0.24	8.34	0.41608	0.04	9.23	0.91459	-0.16	8.47	0.69176	1.19	10.07	0.09732	0.58	9.76	0.14082	-0.24	9.35	0.42729	-0.4	8.02	0.2156	-0.7	7.87	0.10292	0.51	8.48	0.08686	1.19	8.92	0.00286	-0.18	8.24	1	0.12
	THC0290_0296	355517	355957	-1	CDS		Probable cytosine/adenosine deaminase	THC0290_v2_0305		1.36	9.83	0.02063	2.39	10.35	0.00107	0.21	9.13	0.18363	-0.18	10.02	0.63285	-0.02	9.55	0.94913	1.06	11.13	0.08421	1.4	11.29	0.06657	1.93	11.56	0.03738	-0.18	8.93	0.48832	-0.5	8.77	0.09369	0.22	9.13	0.2129	0.46	9.79	0.08785	-0.24	9.44	1	-0.4
	THC0290_0297	356020	356607	1	CDS		Protein of unknown function	THC0290_v2_0306		0.54	8.44	0.02251	0.8	8.57	0.0089	0.34	8.4	0.06239	1.86	10.39	0.00055	0.07	8.74	0.76662	0.48	9.78	0.15622	1.03	10.05	0.04118	1.86	10.47	0.03936	0.02	8.23	0.95112	-0.07	8.19	0.77754	2.18	9.31	0.00575	0.09	8.59	0.4118	-0.07	8.51	1	0.19
dxs	THC0290_0298	356654	358429	1	CDS		1-deoxy-D-xylulose-5-phosphate synthase	THC0290_v2_0307	dxs	0.14	9.29	0.60968	0.96	9.69	0.00448	-0.19	9.17	0.20474	2.27	10.45	0.00055	0.08	9.11	0.71069	0.17	10.27	0.7098	-0.1	10.13	0.59135	-0.21	10.07	0.52291	0.16	9.34	0.47872	0.19	9.36	0.42806	0.66	9.59	0.03174	0.51	9.35	0.01401	0.09	9.14	1	0.02
	THC0290_0299	358481	361225	-1	CDS		Probable M36 fungalysin family metalloprotease precursor	THC0290_v2_0308		-0.47	13.75	0.02634	-2.46	12.75	0.00104	-0.26	13.66	0.27458	-0.51	14.22	0.01111	-0.02	14.44	0.91342	-0.16	11.2	0.63477	-0.11	11.23	0.56545	-0.17	11.2	0.60961	-0.51	13.54	0.16218	-0.58	13.5	0.11012	0.46	14.02	0.20241	-0.09	14.21	0.49333	-0.08	14.21	1	-0.1
	THC0290_N_0219	361577	361788	1	Region	indep	new TR			1.43	9.75	0.12779	2.94	10.51	0.00619	0.05	9.3	0.80848	0.73	9.29	0.04628	0.26	9.24	0.32039	0.74	11.63	0.29909	1.75	12.13	0.05969	1.83	12.17	0.09258	-0.69	8.93	0.08467	-0.88	8.83	0.04921	0.02	9.28	0.96071	0.34	9.46	0.13928	0.29	9.44	1	-0.82
	THC0290_N_0220	361742	361813	-1	Region	3prime	new TR			-0.08	4.15	0.77036	-0.03	4.18	0.93032	0.05	3.92	0.73797	-0.05	3.88	0.6054	-0.04	3.96	0.85449	2.51	5.21	0.13184	0.67	4.29	0.19955	1.91	4.91	0.42507	0.07	3.93	0.77879	0.34	4.06	0.16964	0.13	3.96	0.50451	-0.06	3.95	0.70449	0.08	4.02	1	-0.06
	THC0290_0300	361814	364573	-1	CDS		Probable M36 fungalysin family metalloprotease precursor	THC0290_v2_0310		1.25	11.27	0.00343	0.56	10.93	0.04049	0.69	10.69	0.09506	-1.23	12.82	0.0173	-0.68	12.35	0.03878	-0.9	10.65	0.11007	-0.02	11.09	0.91581	-0.1	11.05	0.84482	0.76	10.72	0.14033	0.89	10.79	0.11735	-1.92	9.38	0.03592	-1.95	10.78	0.00272	0.11	11.81	1	-0.04
dgt	THC0290_0301	364659	366002	-1	CDS		Deoxyguanosinetriphosphate triphosphohydrolase (dGTPase)	THC0290_v2_0311	dgt	0.07	10.04	0.68906	-0.46	9.78	0.04887	0.16	9.92	0.46216	-1.92	9.54	0.00055	-0.03	10.21	0.88135	-0.96	8.35	0.08385	-0.53	8.56	0.1509	-1.7	7.97	0.28295	0.3	9.99	0.33227	0.36	10.02	0.22662	-0.52	9.58	0.09697	-0.06	10.09	0.64196	-0.02	10.11	1	0.09
	THC0290_N_0221	366003	366148	-1	Region	intra	new TR			-0.05	11.13	0.78758	-0.48	10.91	0.04412	0.07	11	0.77592	-1.63	10.37	0.0006	0.03	11.4	0.8988	0.01	10.01	0.98739	-0.31	9.85	0.46278	-0.7	9.66	0.58047	0.37	11.15	0.26733	0.32	11.12	0.39402	-0.45	10.74	0.13368	0.24	11.31	0.20039	-0.03	11.18	1	0.87
	THC0290_0302	366149	367459	-1	CDS		Probable penicillin-binding protein precursor	THC0290_v2_0312		0	9.75	0.98011	-0.18	9.66	0.28622	0.11	9.63	0.68533	-1.44	9.57	0.00073	-0.07	9.96	0.70036	-0.46	9	0.19634	-0.73	8.86	0.05026	-0.57	8.95	0.52599	0.52	9.83	0.1703	0.57	9.86	0.12553	-0.44	9.35	0.1795	0.16	9.96	0.28518	-0.16	9.8	1	0.15
polA	THC0290_0303	367487	370333	-1	CDS		DNA polymerase I	THC0290_v2_0313	polA	0.01	10.15	0.96455	-0.02	10.14	0.89624	-0.1	9.85	0.6011	-1.24	10.04	0.00288	0.2	10.31	0.29797	0.17	9.83	0.4888	0.12	9.81	0.65619	0.2	9.85	0.77694	0.55	10.18	0.14822	0.43	10.11	0.14683	-0.39	9.71	0.20404	0.01	10.24	0.92034	-0.05	10.21	1	0.25
	THC0290_0304	370460	371698	1	CDS		Probable transmembrane protein of unknown function	THC0290_v2_0314		-0.91	9.06	0.01774	-0.51	9.26	0.01795	-0.58	9.44	0.08497	0.3	8.17	0.16203	-0.3	8.79	0.1727	0.2	10.02	0.4691	-0.08	9.88	0.67472	0.44	10.14	0.21542	0.23	9.84	0.51231	0.11	9.78	0.77599	0.12	9.78	0.73881	-0.05	9.41	0.82184	0.03	9.45	1	-0.14
	THC0290_0305	371748	372044	1	CDS		Thioredoxin family protein	THC0290_v2_0315		0.55	10.96	0.20633	0.61	10.99	0.02797	-0.66	10.79	0.0876	-0.68	10.65	0.01556	0.25	11.02	0.35351	1.58	12.15	0.08303	2.45	12.58	0.02861	2.01	12.36	0.03738	0.06	11.15	0.88601	0.4	11.33	0.28449	-0.33	10.96	0.33072	-0.91	10.8	0.00982	-0.16	11.17	1	-0.41
	THC0290_N_0222	372045	372409	1	Region	3prime	new TR			-0.44	9.74	0.03781	-0.2	9.86	0.53664	-1.18	9.61	0.00839	0.68	9.78	0.03904	0.02	9.35	0.97442	1.27	10.64	0.12537	1.03	10.52	0.08848	0.71	10.36	0.22023	-0.05	10.18	0.87002	-0.03	10.19	0.91342	-0.18	10.12	0.39734	-0.14	9.12	0.54342	0.35	9.36	1	-0.21
	THC0290_0306	372055	372684	-1	CDS		Probable polysaccharide deacetylase	THC0290_v2_0316		1.09	9.79	0.00725	0.31	9.4	0.24402	0.26	9.35	0.18892	-1.45	9.03	0.00538	-0.21	9.76	0.36607	0.62	9	0.11057	0.85	9.12	0.04179	1.28	9.33	0.05048	-0.14	9.14	0.57718	-0.23	9.1	0.36407	0.04	9.24	0.848	-0.07	9.56	0.57291	-0.05	9.57	1	0.3
	THC0290_0307	372841	373998	-1	CDS		Probable ABC-type transport system, permease component	THC0290_v2_0317		1.53	10.47	0.0042	1.47	10.44	0.01154	0.23	9.76	0.25791	-0.38	9.71	0.02001	-0.22	10.17	0.33378	-1.56	8.54	0.1044	-3.01	7.81	0.24939	-0.28	9.18	0.6124	0.17	9.73	0.50219	0.21	9.75	0.38455	0.17	9.73	0.38668	0.61	10.36	0.01285	0.01	10.06	1	0.07
	THC0290_0308	373995	374993	-1	CDS		Probable ABC-type transport system, membrane fusion efflux lipoprotein precursor component	THC0290_v2_0318		1.45	11.19	0.00502	1.59	11.26	0.00259	0.33	10.34	0.12821	-0.66	10.6	0.00638	-0.07	10.89	0.72847	0.09	10.36	0.76161	-0.15	10.24	0.41027	0.64	10.63	0.09685	0.51	10.43	0.1217	0.42	10.39	0.14166	0.19	10.28	0.48403	0.85	11.25	0.01353	-0.09	10.78	1	-0.03
	THC0290_0309	375002	376381	-1	CDS		Probable outer membrane efflux protein precursor	THC0290_v2_0319		1.52	10.9	0.00449	2.07	11.18	0.00119	0.55	10.18	0.03585	-0.71	10.31	0.02576	-0.02	10.48	0.91342	0.46	11.12	0.14547	0.56	11.17	0.24469	1.07	11.42	0.05983	0.56	10.19	0.11252	0.36	10.09	0.17471	0.3	10.06	0.16821	0.64	10.69	0.01096	0.04	10.4	1	-0.16
	THC0290_N_0223	376405	376471	1	Region	indep	new TR			3.17	6.66	0.1569	5.06	7.6	0.01366	-0.73	5.37	0.30612	2.56	6.52	0.04722	-0.58	5.14	0.47827	0.9	6.66	0.81059	0.34	6.38	0.91858	3.55	7.98	0.12207	-1.21	5.13	0.1823	-0.51	5.48	0.50906	-0.65	5.41	0.39004	0.45	5.43	0.11347	-0.19	5.1	1	-0.46
	THC0290_0310	376525	379755	-1	CDS		Probable transmembrane protein of unknown function	THC0290_v2_0320		1.24	12.12	0.00358	1.27	12.14	0.00918	-0.37	11.14	0.21145	-1.02	11.55	0.0018	-0.49	11.69	0.07693	-0.48	12.2	0.2226	-1.36	11.76	0.02963	-1.01	11.94	0.0511	0.38	11.51	0.29488	0.26	11.46	0.42447	-0.29	11.18	0.38427	-0.63	11.21	0.00713	0.04	11.55	1	0.11
	THC0290_tRNA_0007	379910	379983	1	tRNA		transfer RNA-Gln			2.27	6.8	0.13825	5.38	8.36	0.00488	-0.22	6.39	0.19992	0.96	6.58	0.16904	0.36	6.2	0.2816	2.65	10.51	0.15111	3.3	10.83	0.07191	4.07	11.21	0.08184	-0.06	6.47	0.86254	0.01	6.51	0.96007	-0.51	6.24	0.05611	0.3	6.88	0.3706	-0.12	6.66	1	-1.32
	THC0290_N_0225	379982	380030	-1	Region	3prime	new TR			0.33	4.14	0.4485	0.94	4.44	0.01	-0.28	4.85	0.78098	-0.08	3.97	0.65104	-0.36	4.2	0.32724	2.49	7.84	0.26724	-0.45	6.36	0.87969	-1.11	6.04	0.60704	-1.11	4.44	0.32875	-0.86	4.56	0.42531	-1	4.49	0.32404	0	3.9	0.99151	0	3.9	1	-0.02
	THC0290_N_0227	380006	380541	1	Region	3prime-PT	new TR			-0.19	6.24	0.78558	1.3	6.98	0.00188	-1.7	6.14	0.00822	2.17	6.87	0.00403	-0.4	5.22	0.35701	2.28	5.72	0.09641	3.05	6.11	0.03759	2.02	5.59	0.26252	-0.4	6.79	0.34733	-0.87	6.55	0.09511	-1.61	6.18	0.00606	0.07	5.85	0.92071	0.19	5.91	1	-0.35
fbp	THC0290_0311	380031	381038	-1	CDS		Fructose-bisphosphatase	THC0290_v2_0321	fbp	-0.43	11.33	0.13567	-0.36	11.37	0.10561	-0.27	11.39	0.11657	-0.63	10.99	0.04664	0.01	11.44	0.9737	0.28	11.05	0.25044	0.1	10.95	0.58257	0.24	11.02	0.48239	0.8	11.93	0.06905	0.9	11.98	0.0374	-0.62	11.22	0.03535	-0.2	11.37	0.11507	0.06	11.5	1	0.12
yggG	THC0290_0312	381240	382067	1	CDS		Putative secreted M48 family metalloprotease YggG precursor	THC0290_v2_0322	yggG	1.2	13.41	0.00392	1.59	13.6	0.00167	0.85	13.09	0.01076	-0.17	13.42	0.12491	-0.13	13.23	0.6511	0.3	14.05	0.46005	1.12	14.46	0.0305	1.2	14.5	0.0531	-0.28	12.52	0.25199	-0.55	12.39	0.08385	0.24	12.78	0.18703	0.87	13.33	0.00421	-0.05	12.87	1	-0.06
	THC0290_0313	382030	382551	1	CDS		Probable acetyltransferase, GNAT family	THC0290_v2_0323		0.96	12.99	0.00791	0.98	13.01	0.00502	0.74	12.79	0.01388	0.17	13.33	0.20395	-0.24	12.81	0.2665	0.04	13.39	0.89656	-0.14	13.3	0.46542	0.33	13.54	0.29719	-0.48	12.18	0.1148	-0.5	12.17	0.0904	0.12	12.48	0.50397	0.69	12.97	0.00678	-0.01	12.62	1	0.11
	THC0290_N_0228	382552	382823	1	Region	intra	new TR			0.9	12.51	0.00626	0.34	12.23	0.11119	0.66	12.3	0.01632	0.43	12.71	0.01445	-0.12	12.29	0.70993	-0.05	12.71	0.81419	-0.47	12.5	0.13294	-0.48	12.5	0.35345	-0.62	11.66	0.07538	-0.58	11.68	0.07151	0.14	12.04	0.38055	0.63	12.45	0.01094	-0.08	12.1	1	0.12
lysC	THC0290_0314	382824	384077	1	CDS		Aspartate kinase	THC0290_v2_0324	lysC	1.04	12.46	0.00587	0.42	12.15	0.03928	0.66	12.29	0.01645	0.19	12.85	0.09978	-0.12	12.31	0.69096	-0.49	12.31	0.11267	-0.78	12.16	0.04273	-1.06	12.02	0.05365	-0.54	11.69	0.09544	-0.73	11.6	0.0468	-0.01	11.96	0.94312	0.72	12.32	0.00633	0.11	12.02	1	0.14
	THC0290_0315	384123	387530	1	CDS		Protein of unknown function precursor	THC0290_v2_0325		0.44	8.8	0.05863	0.38	8.77	0.10426	0.38	8.71	0.05412	2.65	9.6	0.00068	-0.06	8.51	0.73584	0.29	9.6	0.35725	0.25	9.58	0.35971	0.72	9.81	0.19106	-0.31	8.36	0.24116	-0.46	8.29	0.09406	0.77	8.9	0.01858	0.32	8.6	0.04327	0.02	8.44	1	-0.12
	THC0290_0316	387602	388201	1	CDS		Hypothetical protein precursor	THC0290_v2_0326		2.38	13.79	0.00655	0.25	12.73	0.83474	0.95	13.1	0.01933	-1.2	13.95	0.00151	0.02	14.08	0.95988	-0.08	13.32	0.8164	0.71	13.72	0.05649	0.72	13.72	0.10453	-0.92	12.17	0.06576	-1.21	12.02	0.03619	0.84	13.05	0.02671	0.19	13.43	0.20122	-0.03	13.32	1	-0.04
	THC0290_N_0230	388202	388287	1	Region	intra	new TR			2.76	13.18	0.01774	0.94	12.27	0.34495	1.1	12.15	0.01134	-1.7	13.63	0.00321	-0.21	13.13	0.45822	0.24	12.8	0.50371	0.72	13.04	0.05018	1.4	13.38	0.03973	-0.77	11.22	0.08211	-0.99	11.1	0.04665	0.73	11.97	0.08815	0.32	12.6	0.06209	-0.19	12.35	1	-0.78
	THC0290_0317	388288	389880	1	CDS		Probable glycoside hydrolase, family 13	THC0290_v2_0328		0.9	9.99	0.00876	-0.6	9.25	0.13861	0.01	9.53	0.95315	-0.43	9.14	0.0239	-0.27	9.67	0.30097	-0.33	9.03	0.2226	-0.8	8.8	0.06657	-0.03	9.18	0.96671	-0.1	9.48	0.70431	-0.11	9.47	0.65017	0.26	9.65	0.19424	0.55	9.77	0.01934	0.19	9.59	1	-0.15
	THC0290_N_0231	389881	389978	1	Region	intra	new TR			0.65	9.21	0.01416	-1.04	8.37	0.11846	0.08	9	0.60528	-0.27	8.61	0.03966	-0.15	9.01	0.48207	-0.13	8.27	0.71403	-0.44	8.11	0.2726	-0.18	8.24	0.81758	-0.27	8.83	0.27606	-0.05	8.94	0.86623	0.19	9.06	0.35252	0.26	9.14	0.07568	-0.03	9	1	0.12
	THC0290_0318	389979	391058	1	CDS		Hypothetical protein precursor	THC0290_v2_0329		0.45	9.71	0.03641	-1.45	8.76	0.06706	0.06	9.47	0.67937	0.15	9.04	0.34487	-0.1	9.36	0.58157	-0.1	8.42	0.63794	-0.09	8.42	0.67257	0.62	8.78	0.09805	-0.24	9.32	0.30241	-0.18	9.35	0.49789	0.19	9.54	0.25732	0.28	9.5	0.07755	0.06	9.39	1	-0.16
	THC0290_N_0232	391059	391227	1	Region	intra	new TR			0.24	9.5	0.10516	-0.08	9.34	0.58891	-0.22	9.36	0.14693	0.78	9.42	0.00265	0.04	9.19	0.90251	0.43	9.51	0.14595	0.47	9.53	0.08044	1.14	9.87	0.1357	-0.38	9.28	0.15331	-0.25	9.35	0.28157	0	9.47	0.98971	0.16	9.43	0.17192	-0.03	9.33	1	-0.12
	THC0290_0319	391228	391704	1	CDS		Hypothetical protein	THC0290_v2_0330		0.38	9.11	0.04249	-0.24	8.8	0.20038	-0.32	9.05	0.15636	0.73	8.85	0.00837	0.18	8.87	0.58975	1.2	9.56	0.08303	1.02	9.47	0.03659	1.27	9.6	0.11878	-0.74	8.84	0.06196	-0.7	8.85	0.04921	-0.07	9.17	0.67757	-0.06	8.89	0.60256	-0.07	8.89	1	-0.2
	THC0290_N_0233	391705	392250	1	Region	repeated_region	new TR			0.72	7.61	0.08865	1.92	8.21	0.00121	-0.36	7.24	0.13874	1.32	7.49	0.00659	0.11	7.25	0.66625	1.46	9.3	0.08303	1.32	9.23	0.06042	1.23	9.19	0.0511	-0.36	7.24	0.25761	-0.1	7.37	0.74749	-0.22	7.31	0.38868	0.23	7.25	0.11046	0.31	7.29	1	-0.28
	THC0290_0320	392251	392391	1	gene		Glycerophosphoryl diester phosphodiesterase (fragment)	THC0290_v2_0332	glpQ	0.6	8.35	0.05823	1.76	8.93	0.00129	-0.61	7.79	0.05633	0.98	8.56	0.02328	0.19	7.86	0.41947	1.17	9.72	0.08318	1.13	9.7	0.08414	1.29	9.78	0.0414	-0.15	8.02	0.6613	-0.09	8.05	0.80197	-0.3	7.95	0.29783	0.11	7.91	0.32029	0.03	7.87	1	-0.35
	THC0290_0321	392440	393687	1	CDS		Protein of unknown function	THC0290_v2_0333		0.68	8.73	0.01442	2.31	9.55	0.00123	0.33	8.42	0.07347	0.04	9.37	0.78157	-0.01	8.31	0.95662	0.27	10.7	0.33866	-0.32	10.41	0.25329	-1.3	9.92	0.07915	0.66	8.59	0.07185	0.72	8.62	0.05077	0.1	8.31	0.56058	0.6	8.51	0.01127	0.02	8.22	1	0.1
	THC0290_N_0235	393012	393683	-1	Region	3prime	new TR			-1.02	7.29	0.0184	-1.19	7.21	0.00353	-1.87	7.01	0.00839	2.58	7.64	0.0008	-0.13	6.96	0.80335	0.95	6.33	0.20167	0.61	6.16	0.11001	0.13	5.92	0.96108	-1.37	7.27	0.06027	-1.72	7.09	0.03187	-0.27	7.81	0.16692	-0.57	6.42	0.21197	0.2	6.81	1	-0.13
	THC0290_0322	393684	394175	-1	CDS		Probable transmembrane protein of unknown function	THC0290_v2_0334		-0.05	10.29	0.82516	0.27	10.45	0.43926	-0.69	10.08	0.02146	0.09	9.67	0.50871	0.05	10.38	0.81302	1.57	10.59	0.08303	1.94	10.78	0.06073	1.38	10.5	0.08812	-0.89	9.98	0.05676	-1.07	9.89	0.03619	0.02	10.44	0.94447	-0.61	9.96	0.01076	-0.02	10.26	1	-0.19
mvaD	THC0290_0323	394273	395355	1	CDS		Diphosphomevalonate decarboxylase	THC0290_v2_0335	mvaD	0.23	10.93	0.13162	0.86	11.25	0.00533	0.2	10.96	0.19941	-0.6	10.56	0.005	0.04	10.68	0.86216	-0.05	11.28	0.8635	-0.23	11.18	0.37393	-0.05	11.28	0.94483	0.13	10.92	0.57543	0.16	10.93	0.48464	-0.12	10.79	0.44005	0.35	10.97	0.02947	-0.04	10.78	1	-0.11
	THC0290_0324	395386	395604	1	CDS		Hypothetical protein	THC0290_v2_0336		0.91	11.22	0.00722	1.94	11.74	0.00194	0.74	11.2	0.01187	-0.59	10.35	0.01418	-0.02	11.02	0.95772	0.36	13.02	0.31121	0.51	13.09	0.06961	0.89	13.28	0.0661	0.05	10.86	0.83802	0.12	10.89	0.60891	0.26	10.96	0.16942	0.36	11.03	0.07889	0.08	10.88	1	0.03
	THC0290_0325	395604	395825	1	CDS		Hypothetical protein	THC0290_v2_0337		0.84	11.34	0.00882	1.86	11.85	0.00267	0.73	11.38	0.02307	-0.91	10.48	0.0097	-0.01	11.12	0.96291	0.32	13.05	0.3567	0.36	13.07	0.14877	0.99	13.38	0.05564	-0.1	10.96	0.73035	-0.05	10.98	0.87763	0.27	11.14	0.24947	0.4	11.15	0.0277	-0.01	10.94	1	-0.19
	THC0290_N_0236	395826	395917	1	Region	intra	new TR			0.91	13.69	0.00755	1.63	14.06	0.00674	0.67	13.63	0.05491	-1.09	12.86	0.00392	-0.24	13.3	0.23472	0.98	14.97	0.09938	0.82	14.89	0.0637	1	14.98	0.06268	0	13.29	0.99281	-0.04	13.27	0.91165	0.21	13.4	0.44442	0.19	13.39	0.30923	0.01	13.3	1	-0.23
mvaK	THC0290_0326	395918	396856	1	CDS		Mevalonate kinase	THC0290_v2_0338	mvaK	0.74	11.5	0.00835	1.1	11.68	0.00539	0.59	11.36	0.02288	-1.03	11.23	0.00198	0.01	11.27	0.9729	0.01	12.64	0.97388	-0.45	12.41	0.08802	-0.72	12.27	0.08669	0.1	11.11	0.68218	0.08	11.1	0.77764	0.4	11.26	0.08042	0.23	11.2	0.08586	0.03	11.1	1	0.09
	THC0290_0327	396899	397816	1	CDS		Prenyltransferase family protein	THC0290_v2_0339		0.02	9.39	0.9157	-0.63	9.07	0.09104	0.06	9.4	0.70725	0.8	9.43	0.00714	-0.15	9.18	0.61752	0.41	9.22	0.28705	0.08	9.05	0.88991	-1.94	8.05	0.08668	-0.03	9.36	0.94156	-0.06	9.34	0.84435	0.43	9.58	0.10355	0.34	9.16	0.08597	0.01	8.99	1	0.01
	THC0290_N_0239	397817	397941	1	Region	intra	new TR			0.07	9.3	0.76944	0.16	9.35	0.52422	0.08	9.23	0.69313	-0.19	9.12	0.1249	0.19	9.07	0.34894	0.54	9.11	0.15489	0.28	8.98	0.69741	1.87	9.78	0.12087	-0.09	9.15	0.79058	0	9.19	0.99416	0.18	9.28	0.47573	0.08	8.97	0.55478	-0.01	8.93	1	-0.03
	THC0290_0328	397957	398865	1	CDS		Pseudouridylate synthase	THC0290_v2_0340		0.41	12.16	0.05276	1.27	12.59	0.00219	0.26	12.19	0.10905	-0.04	11.94	0.79281	-0.14	11.88	0.43595	0.21	12.97	0.39739	0.2	12.96	0.3465	-0.41	12.66	0.22173	0.23	12.18	0.39722	0.39	12.26	0.12263	-0.23	11.95	0.19704	0.67	12.21	0.00707	0.14	11.94	1	0.03
	THC0290_N_0240	398866	398973	1	Region	intra	new TR			-0.83	8.74	0.02421	0.7	9.5	0.02785	-0.49	8.98	0.02516	0.75	8.82	0.01149	-0.08	8.35	0.7076	0.65	10.21	0.14051	-0.04	9.87	0.87647	-1.39	9.19	0.38226	0.35	9.41	0.39804	0.46	9.46	0.10063	-0.56	8.95	0.04757	0.77	8.98	0.01327	0.01	8.59	1	-0.21
	THC0290_0329	398974	399336	1	CDS		Protein of unknown function	THC0290_v2_0341		-0.46	9.3	0.03014	0.15	9.6	0.44653	-0.3	9.66	0.08387	-0.08	8.53	0.56615	-0.25	8.93	0.32259	0.34	10.52	0.42748	0.52	10.61	0.18539	-1.66	9.52	0.14581	0.48	10.05	0.31305	0.52	10.06	0.12126	-0.52	9.55	0.0482	0.59	9.5	0.05336	0.06	9.23	1	0.14
	THC0290_N_0241	399232	399754	-1	Region	3prime	new TR			0.58	7.28	0.1856	2.09	8.04	0.00424	0.09	7.4	0.81927	1.66	7.28	0.0193	0.24	6.74	0.55743	1.06	9.74	0.08303	0.87	9.64	0.05958	0.72	9.57	0.3303	-0.46	7.12	0.32742	-0.01	7.35	0.99067	0.09	7.4	0.85521	-0.21	6.75	0.38846	0.2	6.96	1	-0.29
	THC0290_0330	399755	400099	-1	CDS		Putative transcriptional regulator	THC0290_v2_0342		0.38	8.61	0.20074	1.77	9.3	0.0134	-0.21	8.44	0.35595	-0.37	7.52	0.44656	0.04	8.29	0.8546	0.93	10.52	0.08417	1.37	10.74	0.12697	1.59	10.85	0.06915	0	8.55	0.9965	0.09	8.59	0.78243	-0.44	8.33	0.16099	-0.09	8.21	0.59071	0.05	8.28	1	-0.28
	THC0290_0331	400184	400381	1	CDS		Hypothetical protein	THC0290_v2_0343		-0.11	6.66	0.43383	1.07	7.25	0.04488	-0.42	6.6	0.06028	0.62	6.51	0.02321	-0.12	6.65	0.78481	1.43	8.58	0.13473	1.9	8.82	0.06964	2.72	9.23	0.05783	-0.33	6.65	0.20112	-0.57	6.53	0.07312	1.23	7.43	0.01118	-0.03	6.77	0.83357	0.08	6.83	1	-0.06
	THC0290_N_0243	400566	400739	1	Region	5prime	new TR			1.04	8.57	0.00901	2.82	9.46	0.00084	-0.26	8.34	0.27471	-2.48	10.16	0.00137	0.37	8.42	0.1781	-0.04	13.13	0.88257	-0.16	13.07	0.41108	0.09	13.19	0.79315	-0.6	8.17	0.1256	-0.58	8.18	0.16059	2.01	9.47	0.00755	1.15	9.24	0.0048	0.15	8.74	1	-0.09
	THC0290_0332	400740	408701	1	CDS		Protein of unknown function precursor, putative adhesin	THC0290_v2_0344		0.82	15.25	0.02129	0.72	15.2	0.00721	-0.31	14.69	0.12915	-0.46	16.27	0.01606	-0.05	15.29	0.95602	0	17.1	1	0	17.1	1	-1	16.6	0.1391	-0.25	14.72	0.397	-0.46	14.61	0.32127	1.65	15.67	0.00755	0.56	15.84	0.00944	0	15.56	1	-0.34
	THC0290_0333	408753	409667	1	CDS		Protein of unknown function precursor	THC0290_v2_0345		0.66	13.5	0.01125	0.41	13.38	0.14113	0.31	13.21	0.07402	0.82	14.08	0.00325	-0.05	13.31	0.83462	-1.07	13.83	0.087	-0.64	14.04	0.07127	-0.58	14.07	0.19794	-0.5	12.8	0.11279	-0.69	12.7	0.05077	0.59	13.35	0.02726	0.33	13.38	0.03551	0.07	13.25	1	-0.06
	THC0290_0334	409678	411612	1	CDS		Probable outer membrane protein precursor, OmpA family	THC0290_v2_0346		0.75	13.55	0.0115	0.21	13.28	0.19565	0.28	13.4	0.11427	0.63	14.04	0.00491	0.09	13.49	0.6609	-1.03	13.86	0.1319	-0.58	14.08	0.06657	-0.56	14.09	0.29746	-0.67	12.93	0.08109	-0.78	12.87	0.04417	0.48	13.5	0.04965	0.11	13.52	0.37092	0.03	13.48	1	0
accD	THC0290_0335	411656	412510	-1	CDS		Acetyl-coenzyme A carboxylase carboxyl transferase beta subunit	THC0290_v2_0347	accD	0.04	13.24	0.76257	-0.06	13.19	0.65113	0.25	13.19	0.23629	-0.73	13.06	0.007	-0.1	13.22	0.60789	-0.38	12.05	0.16098	-0.64	11.92	0.05249	-0.55	11.96	0.15248	0.07	13.1	0.8173	0.07	13.1	0.82199	-0.2	12.97	0.41445	0.28	13.23	0.06635	0.1	13.14	1	0.08
	THC0290_N_0246	412511	412571	-1	Region	intra	new TR			-0.08	11.43	0.84603	0.31	11.63	0.30079	0.45	11.63	0.14701	-0.78	11.33	0.00416	0.21	11.63	0.46027	-0.49	10.98	0.2226	-0.86	10.79	0.04979	-1.37	10.54	0.17957	-0.08	11.36	0.86254	0.17	11.48	0.65017	-0.13	11.33	0.66738	0.49	11.59	0.32413	0.26	11.48	1	0.47
fbaA	THC0290_0336	412572	413639	-1	CDS		Fructose-bisphosphate aldolase	THC0290_v2_0348	fbaA	0.19	13.2	0.24279	0.29	13.25	0.11881	0.11	13.08	0.46813	-1.19	12.88	0.00163	-0.05	13.14	0.82468	-0.14	12.2	0.52734	-0.4	12.07	0.1544	-0.21	12.16	0.50853	-0.05	13	0.84429	-0.04	13.01	0.8796	-0.16	12.94	0.36912	0.24	13.23	0.09056	-0.13	13.04	1	0.09
	THC0290_0337	413681	416212	-1	CDS		Probable outer membrane lipoprotein precursor	THC0290_v2_0349		0.6	9.89	0.02215	0.79	9.98	0.03478	0.1	9.83	0.51754	-0.96	9.6	0.00262	-0.05	9.95	0.81049	0.01	9.38	0.98739	0.46	9.61	0.12479	0.45	9.61	0.30283	-0.15	9.71	0.55186	-0.16	9.7	0.57824	0.26	9.91	0.22492	0.56	10.11	0.01896	0.03	9.84	1	-0.1
	THC0290_N_0247	416229	416973	-1	Region	3prime	new TR			-0.46	7.44	0.08488	-1.18	7.08	0.02051	-1.03	7.62	0.02768	1.97	7.3	0.00115	0.23	7.15	0.64079	-0.71	5.97	0.70884	-1.78	5.43	0.07145	-1.69	5.48	0.14581	-0.95	7.66	0.09544	-1.03	7.62	0.04197	0.73	8.51	0.03527	-0.05	7.22	0.90471	-0.06	7.21	1	-0.09
	THC0290_0338	416249	416977	1	CDS		Probable tRNA/rRNA methyltransferase	THC0290_v2_0350		0.14	9.22	0.39139	0.64	9.47	0.01515	-0.07	9.11	0.66241	-1.14	8.41	0.0018	-0.08	8.93	0.66148	0.94	9.53	0.08809	0.59	9.36	0.08848	0.94	9.53	0.07475	0.49	9.38	0.11337	0.38	9.33	0.14089	-0.47	8.9	0.04924	-0.18	8.83	0.21276	0	8.92	1	0.05
porT	THC0290_0339	416974	417684	-1	CDS		PorT protein	THC0290_v2_0351	porT	0.05	10.1	0.76179	0.34	10.25	0.08478	-0.22	10.04	0.14138	-0.85	9.27	0.00338	0.06	9.81	0.811	-0.16	9.63	0.4841	-0.5	9.47	0.15594	-0.14	9.65	0.66742	-0.07	10.12	0.77957	-0.2	10.05	0.4299	0.74	10.52	0.01779	-0.02	9.82	0.88049	0.05	9.86	1	-0.09
ubiE	THC0290_0340	417706	418437	-1	CDS		Ubiquinone/menaquinone biosynthesis methyltransferase UbiE	THC0290_v2_0352	ubiE	0.3	10.58	0.09307	0.64	10.75	0.01316	-0.17	10.55	0.32883	-1.15	9.72	0.002	-0.05	10.45	0.81674	0.74	10.1	0.0969	1.6	10.53	0.02834	0.98	10.22	0.05959	-0.01	10.63	0.9627	0.11	10.69	0.67742	-0.31	10.48	0.16392	-0.2	10.38	0.13998	0.05	10.5	1	0.1
	THC0290_N_0248	418605	418919	1	Region	indep	new TR			4.08	10.86	0.00631	6.29	11.97	0.00078	1.77	9.65	0.00875	-1.17	10.59	0.0013	-0.33	10.41	0.29693	0.19	12.41	0.59159	1	12.82	0.06916	2.69	13.66	0.03738	-0.65	8.44	0.11449	-0.62	8.45	0.08685	1.69	9.61	0.011	0.4	9.61	0.02406	0.18	9.5	1	-0.25
	THC0290_N_0249	418955	419131	-1	Region	3prime	new TR			-0.7	8.7	0.01954	-2.92	7.59	0.00082	-0.39	8.98	0.09242	-0.23	7.29	0.26935	0.13	8.84	0.525	0.76	6.05	0.39922	-0.05	5.64	0.98481	-0.22	5.56	0.90535	-0.1	9.12	0.77531	-0.59	8.88	0.10356	-0.17	9.09	0.39154	-0.67	8.37	0.02555	0.05	8.73	1	0.07
dfrA	THC0290_0341	419132	419620	-1	CDS		Dihydrofolate reductase	THC0290_v2_0353	dfrA	-0.19	9.31	0.30517	-1.45	8.68	0.0054	-0.35	9.26	0.07753	-2.22	8.08	0.00754	0.04	9.48	0.8747	-0.35	6.29	0.88504	0.3	6.62	0.84834	-0.8	6.07	0.64799	0.02	9.44	0.92354	-0.16	9.35	0.49934	-0.05	9.41	0.7905	-0.39	8.88	0.03119	0.17	9.16	1	-0.09
	THC0290_0342	419620	419949	-1	CDS		Probable transmembrane protein	THC0290_v2_0354		-0.05	9.85	0.71893	-0.7	9.52	0.01015	-0.47	9.62	0.03372	-2.9	8.79	0.00237	0.17	10.07	0.50153	0.98	8.82	0.09016	0.74	8.7	0.10363	1.82	9.25	0.03906	0.16	9.93	0.50996	0.14	9.92	0.60981	-0.08	9.81	0.65618	-0.24	9.57	0.10871	0.09	9.73	1	-0.1
	THC0290_0343	420014	422260	-1	gene		Protein of unknown function precursor (fragment)	THC0290_v2_0355		-1.08	7.34	0.00425	-1.39	7.18	0.00273	-0.66	7.7	0.06239	0.1	6.43	0.80098	-0.02	7.05	0.95573	0.38	5.68	0.71474	2.11	6.55	0.03606	1.98	6.48	0.39206	-0.12	7.97	0.75613	-0.33	7.86	0.36495	-1.04	7.51	0.03672	-0.97	6.95	0.01314	0.08	7.48	1	0.16
thyA	THC0290_0344	422318	423142	-1	CDS		Thymidylate synthase	THC0290_v2_0356	thyA	-0.73	11.2	0.00802	-0.6	11.27	0.01731	-0.5	11.34	0.19617	-1.25	10.64	0.00416	-0.01	11.07	0.98272	-0.45	9.25	0.40226	0.03	9.49	0.91611	-0.58	9.19	0.27807	-0.2	11.49	0.65965	-0.21	11.49	0.66552	-0.49	11.35	0.3476	-0.35	11.38	0.04744	-0.04	11.53	1	0.26
	THC0290_N_0250	423143	423212	-1	Region	intra	new TR			-0.96	10.93	0.00695	-0.25	11.28	0.16965	-0.5	11.05	0.27813	-1.28	10.48	0.00218	0.09	10.79	0.81925	-0.33	9.22	0.27551	-0.2	9.28	0.40425	-0.35	9.21	0.57784	-0.11	11.24	0.85527	-0.25	11.17	0.65645	-0.38	11.11	0.50054	-0.19	11.19	0.41871	0.04	11.3	1	0.07
	THC0290_0345	423213	423833	-1	CDS		Protein of unknown function	THC0290_v2_0357		-0.55	12.27	0.04825	-0.98	12.05	0.00367	-0.49	12.48	0.21833	-1.27	11.39	0.00995	-0.02	12.34	0.97019	-0.2	10.52	0.51047	0.27	10.76	0.22122	-0.08	10.58	0.83545	-0.16	12.65	0.71236	-0.36	12.55	0.42622	-0.47	12.49	0.34004	-0.41	12.59	0.06339	-0.09	12.75	1	-0.06
	THC0290_N_0251	423834	424019	-1	Region	5prime	new TR			-0.62	9.36	0.06087	0.18	9.76	0.60962	-0.68	9.35	0.06021	-1.61	7.93	0.00714	-0.04	9.03	0.92352	0.47	8.64	0.23521	1.31	9.06	0.06922	-0.43	8.19	0.8163	-0.16	9.61	0.67242	-0.47	9.46	0.1907	-0.16	9.61	0.64358	0.02	9.46	0.84641	0.14	9.52	1	-0.23
	THC0290_N_0252	424075	424125	-1	Region	3prime	new TR			0.09	6.97	0.68613	1.66	7.76	0.00322	-0.57	6.95	0.21833	-0.1	8.76	0.76658	-0.12	7.06	0.7875	0.94	8.16	0.14547	0.36	7.87	0.40998	-2.08	6.65	0.34377	0.72	7.6	0.21173	0.5	7.49	0.4679	-0.59	6.94	0.42787	0.4	7.69	0.03459	0.09	7.54	1	0.03
etfA	THC0290_0346	424126	425094	-1	CDS		Electron transfer flavoprotein, alpha subunit	THC0290_v2_0358	etfA	-0.31	12.84	0.08075	-0.98	12.5	0.00352	-0.29	12.72	0.30869	0.73	13.75	0.00494	0.31	13.23	0.16355	-0.16	11.72	0.48791	-0.13	11.74	0.56396	-0.18	11.71	0.66983	0.15	12.94	0.71646	-0.05	12.84	0.8973	-0.16	12.79	0.727	-0.04	13.04	0.79382	-0.06	13.03	1	-0.13
	THC0290_N_0253	425095	425243	-1	Region	intra	new TR			-0.4	11.54	0.0422	-0.88	11.3	0.00663	-0.26	11.42	0.40343	0.9	12.18	0.00187	0.37	11.89	0.1309	0	10.86	0.9981	-0.39	10.67	0.11243	-0.44	10.64	0.25617	0.18	11.64	0.66259	0.22	11.66	0.5644	-0.01	11.55	0.98492	-0.09	11.8	0.5564	0.01	11.85	1	-0.01
etfB	THC0290_0347	425244	425990	-1	CDS		Electron transfer flavoprotein, beta subunit	THC0290_v2_0359	etfB	-0.02	12.31	0.90382	-0.39	12.13	0.06319	-0.22	12.06	0.26938	0.5	13.03	0.0393	0.21	12.5	0.29648	0.53	11.87	0.30907	0.75	11.99	0.04258	0.22	11.72	0.45532	0.16	12.25	0.57552	0	12.17	0.99416	-0.07	12.14	0.80084	-0.17	12.28	0.23676	0.02	12.38	1	-0.22
pdhB	THC0290_0348	426192	427169	1	CDS		Pyruvate dehydrogenase E1 component, beta subunit	THC0290_v2_0360	pdhB	-0.46	13.08	0.04793	-0.61	13.01	0.0114	-0.02	13.14	0.90383	-1.54	12.08	0.00077	-0.02	13.03	0.93778	-0.19	11.69	0.39689	-0.22	11.68	0.27186	-0.32	11.63	0.30272	0.32	13.31	0.20371	0.21	13.25	0.40921	-0.39	12.96	0.06516	-0.5	12.71	0.01745	0.13	13.03	1	0.05
	THC0290_N_0254	427170	427297	1	Region	intra	new TR			-0.41	10.99	0.24842	-0.4	10.99	0.04746	0.09	11.21	0.69939	-1.04	9.99	0.00148	-0.03	11.13	0.92062	0.33	12.67	0.78964	-0.95	12.03	0.41264	1.12	13.07	0.37473	0.28	11.3	0.36369	0.19	11.26	0.56269	-0.34	10.99	0.208	-0.56	10.66	0.02092	0.03	10.95	1	0.17
	THC0290_0349	427298	429790	1	CDS		Probable outer membrane protein precursor	THC0290_v2_0361		-0.42	11.73	0.06563	-0.83	11.53	0.00849	-0.02	11.95	0.91677	-0.43	10.97	0.0376	0.05	11.71	0.80106	-0.37	10.2	0.18054	-0.55	10.11	0.10014	-0.23	10.27	0.47274	-0.17	11.88	0.46945	-0.2	11.86	0.3515	-0.43	11.75	0.05547	-0.91	11.31	0.0042	-0.03	11.75	1	0.17
	THC0290_N_0255	429791	430052	1	Region	intra	new TR			-0.43	10.84	0.11404	-0.17	10.97	0.40995	-0.04	11.1	0.75808	-0.47	10.84	0.01208	0.12	10.81	0.61574	-0.53	10.19	0.23634	-0.18	10.36	0.63534	0.51	10.71	0.5923	-0.22	11.01	0.3625	-0.28	10.98	0.22662	-0.46	10.89	0.07164	0.11	10.71	0.32216	0.02	10.66	1	0.17
ppa	THC0290_0350	430070	430600	1	CDS		Inorganic diphosphatase	THC0290_v2_0362	ppa	-1.25	13.03	0.00368	-1.7	12.8	0.00232	-0.47	13.65	0.06562	-0.28	11.82	0.08041	0.05	13.13	0.83359	-0.36	11.09	0.31812	-0.22	11.16	0.41585	-0.34	11.09	0.479	-0.11	13.83	0.70893	-0.17	13.8	0.53464	-1.04	13.36	0.02141	-0.7	13.33	0.00807	-0.06	13.65	1	-0.07
	THC0290_N_0257	430687	430866	1	Region	indep	new TR			0.69	6.34	0.11373	1.89	6.94	0.01857	-1.12	5.98	0.01844	1.49	6.93	0.09563	-0.3	5.85	0.36704	3.38	7.27	0.07605	2.34	6.74	0.15547	2.67	6.91	0.11649	0.06	6.57	0.90335	0	6.54	1	-0.79	6.14	0.061	-0.15	5.97	0.61105	-0.05	6.02	1	-0.51
	THC0290_0351	430697	431740	-1	CDS		Putative carboxypeptidase	THC0290_v2_0363		0.14	10.59	0.29631	0.11	10.58	0.43536	-0.09	10.47	0.5055	0.61	10.85	0.00804	0.37	10.57	0.18337	0.15	10.14	0.52109	0.37	10.25	0.18581	0.52	10.32	0.2513	-0.71	10.16	0.07446	-0.66	10.19	0.04707	-0.17	10.43	0.43318	0.03	10.58	0.7849	-0.09	10.51	1	0.09
dnaE/dnaQ	THC0290_0352	431831	436357	-1	CDS		Probable DNA polymerase III, alpha and epsilon subunits	THC0290_v2_0364	dnaE/dnaQ	0.05	10.53	0.71974	0.28	10.65	0.08705	-0.29	10.18	0.19986	0.63	10.79	0.00636	0.22	10.32	0.27698	-0.38	10	0.19647	-0.56	9.91	0.14776	-1.23	9.58	0.11842	-0.04	10.3	0.90124	-0.26	10.19	0.35384	-0.23	10.21	0.41048	0.52	10.52	0.0127	-0.05	10.24	1	0.17
	THC0290_N_0258	436358	436423	-1	Region	5prime	new TR			0.75	10.29	0.30274	1.16	10.49	0.04633	-0.73	9.66	0.01287	1.59	10.99	0.00141	0.38	9.76	0.15987	1.31	10.74	0.12164	1.2	10.69	0.11414	1.71	10.94	0.08581	0.15	10.1	0.6317	-0.15	9.95	0.49735	-0.2	9.92	0.30839	0.47	10.12	0.02918	-0.04	9.86	1	-0.41
	THC0290_0353	436626	437957	-1	gene		Divergent AAA domain protein	THC0290_v2_0365		-0.49	8.71	0.02215	0.27	9.09	0.10472	-0.84	8.57	0.02558	3.38	9.46	0.00055	0.33	8.01	0.15739	0.51	9.55	0.38824	0.02	9.3	0.96652	-0.4	9.09	0.26628	-0.21	8.89	0.58552	-0.12	8.93	0.68989	-0.06	8.96	0.85994	0.41	8.45	0.06254	0.05	8.27	1	-0.19
	THC0290_N_0259	437958	438171	-1	Region	5prime	new TR			0.45	10.63	0.07233	1.41	11.11	0.01814	-0.43	10.37	0.0886	1.97	10.6	0.00084	0.34	10.1	0.1638	1.02	11.75	0.08318	1.51	11.99	0.04838	1.91	12.19	0.06975	-0.24	10.46	0.41802	-0.13	10.51	0.64194	-0.16	10.5	0.50451	0.38	10.45	0.03143	-0.04	10.24	1	-0.35
rpbA	THC0290_0354	438303	438704	-1	CDS		Putative RNA-binding protein RbpA	THC0290_v2_0366	rpbA	-0.13	13.29	0.54496	0.7	13.7	0.00937	-0.19	13.44	0.44297	-0.73	12.02	0.00416	-0.11	13.17	0.61965	1.34	14.6	0.08303	1.83	14.85	0.02861	1.81	14.84	0.03738	0.77	13.92	0.11814	0.79	13.93	0.10356	-0.38	13.35	0.20294	-0.67	12.75	0.0072	0.07	13.12	1	-0.17
	THC0290_N_0260	438724	438989	-1	Region	intra	new TR			-0.26	10.13	0.1269	-0.87	9.82	0.00988	-0.04	10.23	0.76798	-0.39	9.8	0.09456	0.07	10.66	0.74857	0.04	9.6	0.89324	-0.05	9.55	0.80516	-1.07	9.04	0.26474	0.33	10.41	0.20285	0.33	10.41	0.16341	0.11	10.3	0.48988	-0.57	10.32	0.02621	-0.07	10.57	1	0.1
	THC0290_0355	438990	439676	-1	CDS		Probable lipoprotein precursor	THC0290_v2_0367		-0.16	10.95	0.37918	-0.55	10.76	0.03604	0.16	10.99	0.38005	-0.55	10.87	0.01822	0.04	11.58	0.83752	0.54	10.54	0.12017	0.57	10.55	0.05991	0.53	10.54	0.18843	0.52	11.17	0.12334	0.48	11.15	0.11587	0.24	11.03	0.24537	-0.78	11.14	0.00787	-0.08	11.49	1	0.17
rpsP	THC0290_0356	439864	440406	1	CDS		30S ribosomal protein S16	THC0290_v2_0368	rpsP	-0.44	14.64	0.02487	-0.24	14.74	0.1496	0.05	14.99	0.76322	-0.65	14.02	0.00832	-0.01	14.88	0.98714	-0.48	13.52	0.25407	-0.53	13.5	0.07127	-0.22	13.65	0.64113	-0.02	14.96	0.95049	0.06	15	0.83934	-0.3	14.82	0.11891	0	14.91	1	-0.02	14.9	1	0.02
rimM	THC0290_0357	440423	440947	1	CDS		16S rRNA processing protein RimM	THC0290_v2_0369	rimM	-1.79	11.6	0.00344	-1.76	11.61	0.00133	-0.44	12.4	0.03107	-0.82	10.36	0.00455	-0.19	11.7	0.49749	-0.8	9.43	0.09016	-0.57	9.55	0.26039	0.22	9.94	0.4795	-0.26	12.5	0.3902	-0.23	12.51	0.28904	-1.04	12.1	0.01584	-1.58	11.44	0.00308	0.01	12.23	1	-0.19
	THC0290_N_0262	440948	441076	1	Region	intra	new TR			-2.04	10.77	0.00302	-1.9	10.84	0.00112	-0.58	11.67	0.05016	-0.74	9.25	0.03251	-0.08	10.8	0.72252	-0.84	8.45	0.17414	0.24	8.99	0.49015	1.11	9.42	0.16756	-0.41	11.76	0.21025	-0.26	11.84	0.34369	-1.06	11.43	0.01673	-1.59	10.6	0.00245	0.16	11.48	1	0.19
yfiC	THC0290_0358	441077	441781	1	CDS		Protein of unknown function YfiC	THC0290_v2_0370	yfiC	-2.43	9.49	0.00262	-2.32	9.55	0.00122	-0.95	10.28	0.0094	-0.24	8.65	0.2985	-0.04	9.49	0.88274	-0.87	7.15	0.10935	-1.85	6.67	0.36641	-0.05	7.57	0.93257	-0.31	10.6	0.33227	-0.18	10.66	0.40016	-1.41	10.05	0.00755	-1.77	9.26	0.00261	0.01	10.15	1	-0.17
	THC0290_N_0263	441466	441936	-1	Region	3prime-PT	new TR			2.11	8.5	0.0038	3.15	9.02	0.00088	0.76	7.93	0.01752	0.65	8.25	0.00773	-0.28	7.54	0.35351	0.87	9.57	0.08824	1.07	9.67	0.04118	0.85	9.56	0.43798	-0.19	7.46	0.57261	0.18	7.64	0.48392	0.57	7.84	0.0343	1.85	8.58	0.00478	0.11	7.71	1	-0.19
	THC0290_N_0264	441896	442163	1	Region	indep	new TR			1.74	5.7	0.07355	3.07	6.36	0.04292	-0.46	5.05	0.04698	-2.22	5.19	0.0032	-0.38	4.87	0.31079	1.77	7.13	0.33077	1.75	7.13	0.34083	0.49	6.5	0.88071	-0.77	4.89	0.06576	-0.97	4.79	0.0374	-0.96	4.79	0.01554	-0.83	5.13	0.07634	-0.9	5.1	1	-0.95
gcdH	THC0290_0359	441970	443148	-1	CDS		Glutaryl-CoA dehydrogenase	THC0290_v2_0371	gcdH	0.15	13.25	0.35695	0.46	13.4	0.0658	0.12	13.15	0.40984	0.21	13.07	0.09913	-0.06	13.15	0.82547	-0.16	13.12	0.48545	-0.14	13.13	0.4584	-0.35	13.02	0.27204	0.2	13.19	0.38756	0.19	13.19	0.38727	-0.21	12.98	0.24726	-0.09	12.99	0.47447	0.01	13.04	1	0.11
	THC0290_N_0266	443181	443281	-1	Region	intra	new TR			-0.89	10.38	0.0071	-1.41	10.12	0.0041	-0.67	10.49	0.02945	0.34	11	0.02741	0.16	10.46	0.48682	-0.67	9.55	0.24097	-0.73	9.52	0.36744	-2.28	8.74	0.30949	0.48	11.06	0.16218	0.57	11.11	0.09483	-0.43	10.61	0.09339	-0.51	10.48	0.02908	-0.01	10.73	1	0.06
gmk	THC0290_0360	443282	443857	-1	CDS		Guanylate kinase	THC0290_v2_0372	gmk	-1.14	10.39	0.0041	-1.57	10.17	0.00225	-0.57	10.53	0.03255	0.54	10.75	0.00827	0.24	10.47	0.25771	-0.72	9.55	0.09072	-0.42	9.7	0.09688	-1.66	9.08	0.12818	0.53	11.08	0.17206	0.55	11.09	0.08949	-0.33	10.65	0.14877	-0.57	10.26	0.00875	-0.01	10.54	1	0.03
	THC0290_0361	443880	444377	-1	CDS		Protein of unknown function	THC0290_v2_0373		-0.82	10.74	0.00672	-1.64	10.33	0.00689	-0.38	10.84	0.15366	0.43	10.78	0.03561	0.27	10.8	0.29648	-0.48	9.93	0.1322	-0.21	10.06	0.27694	-0.63	9.85	0.16719	0.47	11.26	0.22097	0.5	11.28	0.14168	-0.32	10.87	0.25124	-0.44	10.52	0.02048	0	10.74	1	-0.13
	THC0290_0362	444402	445262	-1	CDS		Protein of unknown function	THC0290_v2_0374		-0.46	11.43	0.02862	-0.48	11.42	0.05123	-0.44	11.34	0.07006	-0.22	11.37	0.09733	0.16	11.39	0.38881	-0.28	10.82	0.2541	-0.2	10.86	0.28912	-0.71	10.61	0.25938	0.49	11.81	0.16614	0.45	11.79	0.13383	-0.4	11.36	0.11962	-0.58	11.24	0.01902	-0.1	11.48	1	-0.06
	THC0290_0363	445561	446439	-1	CDS		Probable drug/metabolite-transporting permease	THC0290_v2_0375		-0.82	8.24	0.01078	-1.1	8.1	0.00368	-0.72	8.37	0.01216	1.77	7.92	0.00107	0.1	7.9	0.65331	-0.08	7.29	0.77125	-0.46	7.1	0.33389	-0.19	7.23	0.7044	0.71	9.08	0.08598	0.92	9.19	0.03619	-0.68	8.39	0.02072	-0.51	7.83	0.01265	0	8.09	1	-0.14
	THC0290_0364	446432	446788	-1	CDS		Probable arsenate reductase (glutaredoxin)	THC0290_v2_0376		0.04	9.68	0.80266	0.58	9.95	0.02735	-0.33	9.61	0.07753	0.54	9.31	0.05634	-0.03	9.27	0.88077	0.01	9.42	0.99113	0.04	9.44	0.83428	1	9.92	0.07055	0.68	10.12	0.06905	0.74	10.15	0.0468	-0.67	9.44	0.02967	-0.5	9.29	0.01653	0.04	9.56	1	-0.07
	THC0290_N_0267	446871	447017	1	Region	5prime	new TR			1.82	10.38	0.02105	2.57	10.75	0.00203	0.66	9.83	0.10997	-1.38	9.96	0.00941	0.62	10.6	0.15279	0.81	11.89	0.08417	1.36	12.17	0.03718	2.03	12.5	0.03602	-0.43	9.28	0.47169	-0.55	9.22	0.27032	0.14	9.56	0.72821	1.52	10.69	0.00689	0.1	9.98	1	-0.24
	THC0290_0365	447018	447473	1	CDS		Protein of unknown function	THC0290_v2_0378		1.21	10.27	0.00461	1.27	10.3	0.00216	0.65	9.98	0.01472	-1.26	10.81	0.0022	0.19	10.5	0.42611	0.1	11.04	0.62866	0.42	11.2	0.09111	0.29	11.14	0.47692	-0.1	9.6	0.76997	-0.13	9.59	0.58836	0.1	9.71	0.61971	1.17	10.4	0.00305	0.08	9.85	1	0.24
	THC0290_N_0268	447474	447645	1	Region	intra	new TR			1.23	10.68	0.00339	1.77	10.95	0.0016	0.83	10.36	0.01372	-0.61	11.38	0.016	0	10.78	0.99369	-0.05	11.67	0.81698	0.31	11.86	0.18912	0.02	11.71	0.94474	-0.05	9.92	0.84642	-0.13	9.88	0.55706	0.19	10.04	0.26534	1.15	10.9	0.00528	-0.15	10.25	1	-0.01
	THC0290_0366	447661	448809	1	CDS		Cys/Met metabolism PLP-dependent enzyme	THC0290_v2_0379		0.55	12.63	0.02339	0.82	12.77	0.0155	0.38	12.49	0.05543	-0.99	12.53	0.00186	-0.19	12.51	0.40101	-0.11	13.26	0.74101	-0.65	12.99	0.07372	-0.51	13.06	0.14801	0.27	12.43	0.28576	0.13	12.36	0.53566	0.32	12.45	0.10066	0.43	12.43	0.02253	0	12.21	1	0
	THC0290_N_0269	448689	448837	-1	Region	3prime-PT	new TR			2.33	6.55	0.00476	5.47	8.13	0.00078	1.11	6.38	0.01003	0.69	11.38	0.00623	-0.42	6.01	0.56584	1.46	12.35	0.10215	2.03	12.64	0.04387	1.61	12.43	0.07882	-0.66	5.49	0.09599	-0.67	5.49	0.06783	0.2	5.93	0.34266	4.58	8.42	0.00212	-0.39	5.93	1	-0.64
	THC0290_N_0270	448810	448861	1	Region	3prime	new TR			0.16	10.47	0.29709	1.29	11.04	0.00477	0.13	10.4	0.51289	0.07	10	0.84543	-0.26	10.07	0.48459	0.29	11.56	0.26394	-0.36	11.23	0.16002	-0.99	10.91	0.16153	0.25	10.46	0.35159	-0.02	10.33	0.95414	0.39	10.53	0.08975	-0.16	9.7	0.29664	0.12	9.85	1	-0.14
	THC0290_N_0271	448838	448909	-1	Region	3prime	new TR			3.44	7.51	0.00706	6.64	9.11	0.00142	2.17	7.09	0.00822	-1.11	12.38	0.00322	-0.45	7.42	0.41364	0.36	13.6	0.44745	1.65	14.25	0.07127	1.78	14.31	0.06069	-0.25	5.88	0.3857	-0.78	5.61	0.04397	0.78	6.39	0.01835	5.31	9.72	0.00077	-0.18	6.98	1	0.01
	THC0290_N_0272	448862	449419	1	Region	3prime-PT	new TR			-0.81	8.98	0.01797	-0.73	9.02	0.05156	-0.47	9.22	0.04197	-0.45	6.85	0.10439	-0.09	8.86	0.80549	1.7	9.29	0.1557	1.89	9.38	0.13581	2.41	9.64	0.0839	0.27	9.59	0.31907	0.04	9.47	0.90664	0.23	9.56	0.21245	-2.63	7.37	0.00194	0.21	8.79	1	0.18
	THC0290_0367	448910	449260	-1	CDS		Protein of unknown function precursor	THC0290_v2_0380		3.17	10.13	0.00152	6.12	11.61	0.00078	1.92	9.47	0.00822	-0.5	14.03	0.01302	-0.24	10.18	0.41854	0.61	15.16	0.10303	0.93	15.33	0.03787	1.15	15.44	0.04404	-0.3	8.36	0.44437	-0.5	8.26	0.10251	1.02	9.02	0.02486	4.13	11.84	0.00077	0.15	9.86	1	-0.09
	THC0290_0368	449469	450680	-1	CDS		Probable lipoprotein precursor	THC0290_v2_0382		1.31	8.46	0.00849	2.86	9.23	0.0025	-0.52	7.26	0.12513	-0.66	8.28	0.02507	-1.06	7.75	0.06271	0.83	11.92	0.18869	-0.5	11.26	0.217	-3.52	9.75	0.02862	-0.53	7.25	0.11724	-0.82	7.11	0.04397	-0.19	7.43	0.54566	0.13	8.44	0.79633	-0.06	8.35	1	-0.08
	THC0290_0369	450870	453704	-1	CDS		Probable TonB-dependent outer membrane receptor precursor	THC0290_v2_0383		1.43	7.76	0.01083	3.16	8.62	0.00167	-0.23	6.61	0.25423	0.43	6.88	0.03933	-1.22	6.8	0.05594	0.14	10.26	0.62555	-0.15	10.12	0.54052	-1.3	9.54	0.11954	-0.12	6.67	0.66293	-0.35	6.55	0.1737	-0.47	6.5	0.07041	-0.34	7.32	0.29168	-0.01	7.49	1	-0.09
phoP	THC0290_0370	453885	454571	1	CDS		Two-component system response regulatory protein involved in phosphate regulation	THC0290_v2_0384	phoP	0.04	10.05	0.8498	0.89	10.48	0.00403	-0.57	9.57	0.02918	-1.47	9.15	0.00087	-0.19	9.67	0.36672	0.91	11.22	0.13175	1.67	11.6	0.02861	0.72	11.13	0.21478	0.69	10.19	0.07281	0.72	10.21	0.05311	-0.79	9.46	0.02081	-0.66	9.32	0.00828	-0.03	9.63	1	0.02
phoR	THC0290_0371	454572	455636	1	CDS		Two-component system sensor histidine kinase involved in phosphate regulation	THC0290_v2_0385	phoR	-0.33	9.37	0.05742	-0.51	9.28	0.08991	-0.48	9.23	0.02488	-0.45	8.59	0.02383	-0.06	9.19	0.79732	-0.35	9.45	0.25048	0.1	9.67	0.60806	-0.73	9.26	0.2414	0.55	9.75	0.09599	0.58	9.76	0.06034	-0.84	9.05	0.01512	-0.81	8.8	0.01599	-0.08	9.16	1	0.03
oprP	THC0290_0372	455757	457094	1	CDS		Probable phosphate-selective porin precursor	THC0290_v2_0386	oprP	3.22	10.87	0.0015	2.83	10.67	0.00165	1.2	9.68	0.01003	0.11	8.92	0.4912	-0.83	10.12	0.25246	-0.28	11.55	0.3336	0.42	11.9	0.1211	-0.41	11.48	0.2412	0.59	9.37	0.2809	0.6	9.37	0.08446	0.29	9.22	0.23423	-1.38	9.41	0.00439	-0.09	10.06	1	0.1
pstS	THC0290_0373	457114	457947	1	CDS		ABC-type phosphate-transport system, binding protein precursor component PstS	THC0290_v2_0387	pstS	3.73	11.74	0.0015	4.35	12.05	0.00178	1.48	10.31	0.00839	0.27	10.47	0.0497	-1.03	10.97	0.21502	-0.8	12.77	0.09046	-0.84	12.75	0.06079	-0.85	12.75	0.07855	0.49	9.81	0.25464	0.39	9.76	0.18603	0.67	9.9	0.04844	-0.41	10.5	0.04085	-0.06	10.68	1	-0.06
	THC0290_N_0274	457948	458037	1	Region	intra	new TR			3.33	8.65	0.00298	4.12	9.05	0.00203	1.64	7.25	0.02539	0.98	6.74	0.00965	-0.93	7.92	0.13783	-1.14	9.84	0.09046	-0.45	10.18	0.16718	-1.43	9.69	0.05615	0.76	6.81	0.27817	0.31	6.58	0.60022	0.87	6.87	0.13224	0.59	7.68	0.06099	0.31	7.54	1	0.33
pstC	THC0290_0374	458038	459189	1	CDS		ABC-type phosphate-transport system, permease component PstC	THC0290_v2_0388	pstC	3.71	11.19	0.00152	3.9	11.29	0.00105	1.26	9.7	0.01339	1.11	10.73	0.00158	-1.03	10.3	0.14177	-1.29	11.61	0.09711	-0.6	11.96	0.06367	-1.23	11.64	0.07546	0.31	9.22	0.49338	0.34	9.24	0.29232	0.5	9.31	0.19347	0.11	10.18	0.44432	0.05	10.15	1	-0.15
pstA	THC0290_0375	459193	460137	1	CDS		ABC-type phosphate-transport system, permease component PstA	THC0290_v2_0389	pstA	3.19	10.77	0.00152	3.13	10.74	0.00214	1.35	9.35	0.02657	1.42	10.43	0.00446	-0.95	9.97	0.17684	-1.67	11.03	0.08318	-0.8	11.46	0.04258	-1.76	10.98	0.04075	0.5	8.93	0.37898	0.46	8.91	0.31253	0.42	8.88	0.40237	0.21	9.89	0.30207	0.16	9.87	1	0.17
pstB	THC0290_0376	460164	460922	1	CDS		ABC-type phosphate-transport system, ATPase component PstB	THC0290_v2_0390	pstB	2.81	11.19	0.00172	2.41	10.99	0.00103	1.03	9.97	0.01336	1.58	10.48	0.00071	-0.77	10.47	0.21843	-1.38	11.24	0.08318	-0.42	11.72	0.12801	-0.73	11.57	0.09525	0.4	9.65	0.29083	0.46	9.69	0.13724	0.18	9.55	0.43313	0.02	10.49	0.91588	-0.07	10.45	1	0.1
phoU	THC0290_0377	460961	461689	1	CDS		Phosphate transport system protein PhoU	THC0290_v2_0391	phoU	2.93	11.23	0.00224	2.2	10.86	0.00521	1.02	9.98	0.01049	1.16	10.34	0.0016	-0.83	10.4	0.13498	-1.4	11.2	0.09046	-0.57	11.61	0.12266	-0.96	11.42	0.0723	0.35	9.65	0.25761	0.44	9.69	0.16475	0.14	9.55	0.48458	0.02	10.46	0.83892	-0.06	10.42	1	0.01
	THC0290_0378	461753	462799	-1	CDS		Probable glycosyl transferase	THC0290_v2_0392		0.4	7.26	0.06087	-0.15	6.98	0.56971	-0.56	6.61	0.02073	1.32	6.92	0.08064	-0.05	6.78	0.86672	0.2	7.29	0.59898	0.88	7.63	0.1155	1	7.69	0.16425	0.13	6.95	0.57349	0.17	6.97	0.49821	-0.5	6.63	0.03978	-0.88	6.38	0.0261	-0.07	6.78	1	0.1
	THC0290_0379	462838	463659	-1	CDS		Protein of unknown function	THC0290_v2_0393		1.96	7.36	0.0033	2.64	7.7	0.0021	0.02	6.44	0.95711	0.49	6.23	0.34481	-0.29	6.48	0.31718	0.98	9.47	0.09046	0.56	9.27	0.08869	-1.53	8.22	0.07576	-0.29	6.28	0.41403	-0.53	6.16	0.15165	0	6.43	0.99352	-0.18	6.33	0.51488	-0.01	6.42	1	-0.16
trmB	THC0290_0380	463782	464456	1	CDS		tRNA (guanine-N(7)-)-methyltransferase	THC0290_v2_0394	trmB	-0.59	10.07	0.02108	0.1	10.42	0.47148	-0.41	10.22	0.03869	0.96	9.44	0.00166	0.07	9.84	0.70669	0.18	10.06	0.42285	0.29	10.12	0.33998	0.63	10.29	0.37178	0.31	10.57	0.23198	0.28	10.56	0.21018	-0.19	10.33	0.28185	-0.25	9.98	0.10124	0.14	10.18	1	-0.23
	THC0290_N_0275	464457	464504	1	Region	intra	new TR			-0.2	12.04	0.38675	-0.32	11.97	0.38638	-0.31	12.12	0.20347	0.7	11.48	0.02376	-0.17	11.71	0.5149	-0.12	10.78	0.83997	-0.01	10.84	0.99364	-0.52	10.58	0.56797	0.1	12.33	0.72026	0.04	12.29	0.94552	-0.39	12.08	0.1193	-0.61	11.84	0.0283	-0.12	12.09	1	0.07
	THC0290_0381	464505	465146	1	CDS		Probable transmembrane protein of unknown function. Putative amino-acid efflux protein	THC0290_v2_0395		-1.03	9.79	0.01431	-0.6	10	0.05554	-0.51	10.04	0.03518	1.49	9.65	0.00069	-0.18	9.57	0.52699	-0.06	9.12	0.91176	0.11	9.21	0.5392	0.19	9.25	0.80287	0.17	10.38	0.48935	0.21	10.4	0.39742	-0.21	10.19	0.28399	-0.23	9.72	0.12445	0.09	9.88	1	-0.16
ogt2	THC0290_0382	465233	465565	1	CDS		Methylated-DNA--[protein]-cysteine S-methyltransferase	THC0290_v2_0396	ogt2	-0.65	8.77	0.01465	-0.04	9.07	0.85081	-0.59	8.88	0.03948	1.96	9.01	0.00107	-0.05	8.31	0.89679	-0.37	7.72	0.45869	-1.71	7.05	0.19985	-1.47	7.17	0.28085	0.08	9.21	0.82342	0.08	9.21	0.75593	-0.35	9	0.11341	-0.18	8.64	0.23877	-0.07	8.7	1	-0.06
	THC0290_N_0276	465495	465656	-1	Region	3prime	new TR			0.96	7.04	0.01477	0.55	6.84	0.13086	0.83	7.04	0.01119	1.72	6.89	0.02345	-0.27	6.42	0.25423	-0.33	6.93	0.41497	-1.25	6.47	0.57337	-3.21	5.49	0.02773	0.16	6.71	0.60548	0.15	6.7	0.5084	0.8	7.03	0.01989	-0.35	6.5	0.12172	-0.25	6.55	1	-0.08
	THC0290_N_0277	465566	466070	1	Region	3prime	new TR			-0.98	6.77	0.07938	-1.33	6.6	0.03745	-1.12	6.75	0.01158	2.59	6.96	0.00055	-0.15	6.06	0.83367	-0.32	4.11	0.38396	0.55	4.54	0.43865	-0.14	4.2	0.74162	-0.36	7.13	0.58987	-0.45	7.09	0.17245	-0.66	6.98	0.05193	0.16	6.27	0.57291	0.02	6.2	1	-0.11
	THC0290_0383	465657	466046	-1	CDS		Protein of unknown function precursor	THC0290_v2_0397		0.91	7.94	0.00665	1.48	8.22	0.00179	0.6	7.89	0.05108	0.74	7.97	0.41171	-0.15	7.8	0.58727	0.77	9.11	0.14051	0.86	9.16	0.10554	0.53	8.99	0.27457	0.17	7.68	0.48101	0.37	7.78	0.16425	0.65	7.92	0.02761	-0.63	7.61	0.00879	-0.25	7.8	1	-0.29
	THC0290_N_0278	466184	466264	1	Region	5prime	new TR			-0.66	12.27	0.01898	-1.5	11.85	0.00543	0.26	12.85	0.16459	-0.63	12.09	0.00827	-0.34	12.16	0.30209	-0.72	10.73	0.37188	0.08	11.12	0.83374	0.96	11.56	0.16768	-0.35	12.55	0.25584	-0.22	12.61	0.42843	-0.19	12.63	0.32244	-0.43	12.21	0.03324	0.1	12.47	1	-0.11
actA	THC0290_0384	466265	467587	1	CDS		Alternative complex III, protein A	THC0290_v2_0398	actA	-0.93	13.31	0.01043	-2.2	12.68	0.00115	0.21	13.9	0.16293	-0.43	13.4	0.02382	-0.53	13.24	0.13498	-0.96	11.37	0.1044	0.02	11.86	0.92406	0.53	12.12	0.13135	-0.14	13.73	0.56622	-0.32	13.64	0.17935	-0.04	13.78	0.82287	-0.48	13.29	0.0164	0.03	13.54	1	0.01
	THC0290_N_0279	467588	467676	1	Region	intra	new TR			-0.55	14.72	0.02465	-1.97	14.01	0.0018	0.53	15.2	0.02091	-0.48	14.16	0.00941	-0.62	14.7	0.21549	0.38	13.81	0.82708	-0.36	13.43	0.31274	1.11	14.17	0.14881	-0.01	14.94	0.95991	-0.04	14.92	0.87483	0.32	15.1	0.20137	-0.46	14.77	0.0478	0.06	15.03	1	-0.04
actB	THC0290_0385	467677	470706	1	CDS		Alternative complex III, protein B precursor	THC0290_v2_0399	actB	-1.35	13.63	0.00608	-2.61	13	0.00188	0.08	14.16	0.56224	-0.3	14	0.04543	-0.25	13.68	0.43183	-1.13	11.42	0.08303	-0.15	11.91	0.45272	0.24	12.1	0.41814	0.04	14.13	0.88601	-0.04	14.1	0.89163	0.16	14.19	0.37408	-0.22	13.69	0.20239	0.04	13.83	1	0.08
	THC0290_N_0280	470707	470799	1	Region	intra	new TR			-1.44	11.38	0.02964	-1.81	11.2	0.00567	0.28	12.32	0.08491	0.29	12.25	0.18678	-0.23	11.49	0.26538	-1.31	10.27	0.1044	-0.35	10.75	0.20258	0.31	11.08	0.55884	-0.28	12.04	0.24343	-0.21	12.07	0.33194	-0.17	12.09	0.28639	-0.26	11.71	0.33536	-0.04	11.82	1	0.36
actC	THC0290_0386	470800	472206	1	CDS		Alternative complex III, protein C	THC0290_v2_0400	actC	-1.06	13.73	0.00853	-2.17	13.17	0.00267	0.08	14.15	0.63462	0.16	14.44	0.14768	-0.38	13.6	0.30415	-1.39	11.57	0.08318	-0.34	12.09	0.13161	-0.01	12.26	0.97669	0.08	14.15	0.76335	0.01	14.11	0.97346	0.12	14.17	0.56934	0.31	13.88	0.04982	0.08	13.77	1	-0.05
actD	THC0290_0387	472213	472737	1	CDS		Alternative complex III, protein D	THC0290_v2_0401	actD	-1.07	13.78	0.01186	-2.35	13.14	0.00249	0.26	14.34	0.10832	0.37	14.48	0.01849	-0.23	13.84	0.33367	-1.53	11.47	0.08303	-0.31	12.08	0.19467	0.08	12.27	0.78359	0.07	14.24	0.76836	0.06	14.24	0.8118	0.08	14.25	0.63173	0.07	13.93	0.64009	0	13.89	1	0.13
actE	THC0290_0388	472746	473291	1	CDS		Alternative complex III, protein E precursor	THC0290_v2_0402	actE	-1.17	13.8	0.00542	-2.54	13.11	0.00164	0.09	14.34	0.53247	0.55	14.51	0.00843	-0.34	13.69	0.21688	-1.34	11.48	0.08405	-0.3	12	0.22948	0.12	12.21	0.71536	0.06	14.33	0.81446	0	14.29	0.9925	0.03	14.31	0.83692	-0.03	13.89	0.85376	0.02	13.91	1	0.01
actF	THC0290_0389	473317	474762	1	CDS		Alternative complex III, protein F	THC0290_v2_0403	actF	-1.23	13.66	0.00699	-2.76	12.89	0.00109	0.12	14.19	0.40258	0.59	14.43	0.00969	-0.26	13.6	0.39692	-1.41	11.34	0.08875	-0.26	11.91	0.18865	-0.12	11.98	0.64018	0.15	14.21	0.52703	0.06	14.16	0.81914	0.16	14.21	0.38507	-0.03	13.79	0.80355	-0.04	13.78	1	0
ctaC	THC0290_0390	474781	475953	1	CDS		Cytochrome c oxidase, subunit II	THC0290_v2_0404	ctaC	-1.12	13.71	0.00544	-2.6	12.97	0.00123	0.19	14.29	0.20924	0.78	14.47	0.00422	-0.29	13.72	0.2462	-1.11	11.51	0.08303	-0.13	11.99	0.48177	0.35	12.24	0.31468	0.13	14.26	0.60548	0.02	14.21	0.94349	0.22	14.3	0.22936	0.08	13.94	0.50456	0	13.9	1	0.09
ctaD	THC0290_0391	475985	477790	1	CDS		Cytochrome c oxidase, subunit I	THC0290_v2_0405	ctaD	-0.91	13.44	0.01177	-2.15	12.82	0.00449	0.1	13.97	0.4401	0.83	14.31	0.00208	-0.4	13.4	0.17684	-1.22	11.37	0.08303	-0.17	11.89	0.34895	0.13	12.05	0.64814	0.14	13.99	0.57798	0.08	13.96	0.7639	0.29	14.06	0.13497	0.24	13.76	0.13762	0.01	13.64	1	0.15
	THC0290_N_0281	477791	477858	1	Region	3prime	new TR			-0.19	3.96	0.39969	0.71	4.4	0.34527	-0.34	4.07	0.09506	-0.04	3.95	0.66394	0.05	3.88	0.8038	-0.2	3.95	0.53181	-0.13	3.99	0.64961	2.67	5.39	0.43392	-0.1	4.19	0.69406	-0.19	4.14	0.51557	-0.35	4.06	0.11906	0.48	4.11	0.12075	0.02	3.88	1	-0.02
	THC0290_0392	477872	478558	1	CDS		Protein of unknown function precursor	THC0290_v2_0406		-0.04	9.33	0.81828	1.15	9.92	0.00822	-0.45	9.14	0.05761	0.39	9.99	0.01529	-0.09	8.89	0.72236	0.69	10.1	0.09016	1.07	10.29	0.03562	1.7	10.61	0.05178	0.25	9.49	0.35052	0.15	9.44	0.62102	-0.3	9.22	0.18501	1.62	9.64	0.0048	0.02	8.84	1	-0.04
	THC0290_0393	478553	479161	-1	CDS		Probable transmembrane protein of unknown function	THC0290_v2_0407		-0.25	6.83	0.15606	-0.28	6.81	0.13332	-0.33	6.86	0.08137	0.59	6.69	0.58792	0.19	6.99	0.48325	0.83	6.43	0.1188	-0.76	5.63	0.47466	-0.34	5.85	0.55618	0.21	7.13	0.58665	-0.01	7.02	0.98542	0.02	7.03	0.95754	-0.38	6.8	0.05745	-0.1	6.94	1	-0.02
	THC0290_N_0282	478559	479025	1	Region	3prime	new TR			-0.26	8.75	0.18414	0.74	9.25	0.03158	-0.66	8.82	0.02146	0.99	9.87	0.00393	-0.11	8.37	0.72417	0.62	9.39	0.20283	0.02	9.09	0.95741	0.94	9.55	0.0723	-0.16	9.07	0.58029	0	9.15	1	-0.32	8.99	0.14519	1.37	9.09	0.00276	0.01	8.41	1	0.07
	THC0290_0394	479629	481770	1	CDS		Protein of unknown function precursor, putative S46 family serine protease	THC0290_v2_0408		-1.14	10.89	0.00893	-1.6	10.66	0.003	-0.78	10.82	0.01268	-0.92	11.26	0.00215	0.18	11.01	0.36273	-0.14	9.95	0.58891	-0.52	9.76	0.07372	-0.97	9.54	0.05979	0.35	11.39	0.18809	0.31	11.36	0.22448	0.22	11.32	0.24544	-0.51	10.87	0.01186	-0.01	11.13	1	0.05
	THC0290_N_0283	481771	481941	1	Region	intra	new TR			0.78	11.63	0.28141	1.46	11.97	0.03059	-0.22	11.35	0.54203	-0.62	11.51	0.03482	0.23	11.62	0.48297	0.3	11.26	0.75033	0.04	11.13	0.96686	1.01	11.61	0.59986	-0.12	11.41	0.82045	0.16	11.54	0.74867	0.49	11.71	0.32954	-0.19	11.48	0.26985	-0.02	11.56	1	-0.54
	THC0290_N_0284	481943	482257	1	Region	indep	new TR			0.96	15.35	0.00579	1.42	15.58	0.00175	0.39	15.08	0.06055	-0.75	15.41	0.00461	-0.34	15.43	0.19077	0.66	15.9	0.17201	0.26	15.7	0.48347	0.26	15.7	0.52887	0.05	14.91	0.82712	0.04	14.91	0.87032	0.46	15.12	0.07157	0	15.27	0.97506	-0.12	15.21	1	-0.31
	THC0290_0395	481952	482293	-1	CDS		Hypothetical protein	NA		0.1	3.98	0.52501	0.29	4.07	0.26116	0.07	4.01	0.73755	-0.08	3.92	0.4189	0.01	3.95	0.95573	0.04	3.97	0.88026	1.9	4.9	0.02963	1.88	4.89	0.40149	-0.08	3.94	0.72932	-0.05	3.96	0.84932	-0.02	3.97	0.91672	0.05	3.96	0.69518	0	3.94	1	0.13
	THC0290_N_0285	482258	482799	1	Region	3prime	new TR			0.18	6.76	0.38206	1.22	7.28	0.00438	0.12	6.85	0.64153	-0.38	6.6	0.05897	-0.34	6.25	0.20852	-0.04	8.16	0.90981	-0.98	7.69	0.20176	0.52	8.44	0.29497	-0.09	6.75	0.82045	-0.26	6.66	0.351	0.74	7.16	0.02682	0.05	6.53	0.88049	-0.13	6.44	1	-0.31
	THC0290_0396	482475	482840	-1	CDS		Protein of unknown function	THC0290_v2_0410		-1.94	6.12	0.02988	-1.12	6.52	0.1321	-1.66	6.75	0.00932	3.35	7.48	0.00268	0.48	5.47	0.29521	0.43	6.95	0.36914	0.14	6.8	0.67083	0.48	6.97	0.64132	0.7	7.92	0.21594	0.94	8.05	0.06189	-1.02	7.07	0.01817	0.01	6.31	0.96837	-0.03	6.29	1	-0.23
	THC0290_tRNA_0008	483382	483469	-1	tRNA		transfer RNA-Leu			1.54	9.64	0.16984	4.38	11.06	0.00145	0.13	9.12	0.52973	-1.47	10.8	0.00117	0.74	9.07	0.15279	1.91	12.78	0.087	2.36	13	0.04441	3.19	13.42	0.03642	-0.1	9	0.72006	0.5	9.3	0.094	0.18	9.15	0.64845	-0.04	9.85	0.94172	-0.09	9.83	1	-0.59
	THC0290_tRNA_0009	483510	483585	-1	tRNA		transfer RNA-Gly			0.92	10.66	0.26298	3	11.7	0.0042	-0.52	10.41	0.08095	0.09	9.96	0.67424	0.07	10.05	0.89672	1.3	12.42	0.19488	1.68	12.61	0.10668	2.64	13.09	0.08518	-0.24	10.55	0.45527	-0.01	10.67	0.99047	-0.43	10.46	0.06346	0.29	10.84	0.3565	0.06	10.73	1	-0.44
mutS	THC0290_0397	483724	486324	-1	CDS		DNA mismatch repair protein MutS	THC0290_v2_0412	mutS	0.08	10.42	0.68669	-0.77	10	0.0215	0.48	10.51	0.04279	-2.29	9.17	0.00139	0.06	10.86	0.7808	-0.55	8.09	0.41555	-0.36	8.19	0.40794	0.83	8.78	0.19832	-0.44	10.04	0.13431	-0.43	10.05	0.1182	-0.79	9.87	0.01852	-0.09	10.47	0.6236	-0.01	10.5	1	0.18
	THC0290_0398	486474	486992	1	CDS		Protein of unknown function precursor	THC0290_v2_0413		1.42	14.93	0.00424	0.82	14.63	0.00644	0.65	14.57	0.08574	-2.98	13.08	0.00055	-0.24	14.91	0.26028	0.16	15.7	0.6467	0.07	15.66	0.78851	0.11	15.68	0.71297	-0.42	14.03	0.31128	-0.31	14.08	0.42916	0.35	14.42	0.3223	-0.19	14.2	0.23369	0	14.3	1	-0.04
	THC0290_N_0289	486993	487056	1	Region	3prime	new TR			0.3	4.04	0.20014	0.54	4.16	0.01695	0.07	4.21	0.73344	-0.08	3.9	0.40112	0.11	3.99	0.52508	1.44	5.34	0.32328	2.17	5.71	0.21117	2.03	5.64	0.53397	0.01	4.18	0.98436	-0.06	4.14	0.87035	-0.19	4.08	0.43265	0.3	4.1	0.36411	-0.04	3.93	1	-0.21
	THC0290_0399	487057	487605	1	CDS		Probable tRNA/rRNA methyltransferase	THC0290_v2_0414		0.19	9.09	0.18634	0.75	9.37	0.00683	-0.2	9.15	0.264	-0.18	8.85	0.36906	0.03	8.89	0.86216	0.52	10.99	0.21555	0.52	11	0.09705	0.04	10.76	0.87526	0.54	9.52	0.14648	0.8	9.65	0.07769	0.64	9.57	0.03287	-0.39	9.13	0.0487	-0.15	9.25	1	0.03
	THC0290_0400	487602	488744	-1	CDS		Probable bifunctional protein : 2-amino-4-hydroxy-6-hydroxymethyldihydropteridine diphosphokinase and deoxynucleoside kinase	THC0290_v2_0415		-0.6	8.76	0.01287	-1.27	8.43	0.01413	-0.69	8.73	0.01268	-1.5	7.87	0.12553	0.1	8.77	0.59069	0.64	7.33	0.2226	-0.22	6.9	0.58482	1.12	7.57	0.33809	0.44	9.29	0.13669	0.36	9.25	0.16268	-1.28	8.43	0.00771	-0.66	8.35	0.01198	0.02	8.68	1	0.14
	THC0290_N_0290	487606	488796	1	Region	3prime	new TR			0.3	7.37	0.13825	0.89	7.66	0.006	-0.19	7.37	0.20217	1.87	8.19	0.00055	-0.21	6.91	0.52865	-0.1	9.2	0.7708	-0.67	8.91	0.09514	-1.54	8.47	0.11529	0.12	7.52	0.82456	-0.05	7.44	0.899	0.66	7.79	0.11537	0.38	7.18	0.02621	0.26	7.12	1	0.02
	THC0290_N_0291	488798	488867	1	Region	5prime	new TR			-0.35	8.59	0.2901	0	8.76	0.98194	-0.36	8.7	0.09876	0.54	8.3	0.01162	0.18	8.58	0.61965	0.04	9.17	0.90437	0.23	9.26	0.43865	0.37	9.34	0.30928	0.19	8.97	0.45098	0.09	8.92	0.74606	-0.22	8.77	0.26019	-0.78	8.36	0.00687	0.15	8.83	1	0.13
sppA	THC0290_0401	488868	490631	1	CDS		Protease IV (signal peptide peptidase)	THC0290_v2_0416	sppA	-0.58	10.75	0.02786	-0.98	10.55	0.00683	-0.6	10.71	0.02431	0.47	10.85	0.0109	-0.22	10.55	0.32259	-0.27	10.7	0.3142	0.28	10.98	0.21914	1.15	11.41	0.06929	0.15	11.08	0.52345	-0.01	11	0.96265	-0.32	10.85	0.10324	-0.58	10.49	0.01048	0.14	10.85	1	0
	THC0290_0402	490800	493382	1	CDS		Outer membrane protein precursor, AsmA family	THC0290_v2_0417		-0.05	11.77	0.73186	-1.09	11.24	0.00254	0.06	11.89	0.69627	0.69	12.18	0.00431	-0.08	11.82	0.71584	-0.43	11.29	0.22792	-0.45	11.29	0.10181	0.17	11.6	0.63011	-0.12	11.81	0.62155	-0.18	11.78	0.43683	1.46	12.6	0.00685	0.08	11.84	0.53988	0.03	11.82	1	0.13
	THC0290_N_0292	493173	493641	-1	Region	3prime	new TR			0.55	6.85	0.02561	0.43	6.79	0.1077	0.46	7	0.05282	-0.64	6.01	0.48193	-0.13	6.56	0.67479	-1.81	4.77	0.07605	-1.61	4.87	0.02861	-1.77	4.79	0.03635	-0.39	6.58	0.21474	-0.49	6.53	0.13394	-0.92	6.31	0.02597	0.35	6.45	0.19146	-0.07	6.23	1	-0.01
	THC0290_N_0293	493383	493951	1	Region	3prime	new TR			-0.06	6.82	0.82875	0.1	6.9	0.82813	-0.21	6.96	0.38834	1.05	6.99	0.03531	0.09	6.4	0.87656	0.89	7.12	0.21309	0.25	6.81	0.73845	-0.9	6.23	0.49964	-0.22	6.95	0.57294	0.27	7.2	0.27091	1.1	7.61	0.01586	0.41	6.67	0.21719	-0.4	6.27	1	0.16
	THC0290_0403	493642	494436	-1	CDS		Protein of unknown function	THC0290_v2_0418		0.92	9.9	0.00795	1.6	10.24	0.00213	0.45	9.65	0.03926	-1.44	9.32	0.02461	0.1	9.76	0.61445	0.51	10.36	0.13657	0.94	10.58	0.03576	1.5	10.86	0.03768	-0.14	9.36	0.56917	-0.13	9.36	0.5602	-0.25	9.3	0.18771	0.21	9.81	0.10349	-0.04	9.68	1	0.02
	THC0290_N_0294	494437	494488	-1	Region	5prime	new TR			0.25	7.92	0.39906	1.25	8.42	0.01074	0.59	7.9	0.06205	-2.79	5.75	0.00078	0	7.83	1	-0.06	14.5	0.99113	-1.96	13.55	0.33659	1.61	15.34	0.39951	-0.09	7.56	0.86958	-0.38	7.42	0.1744	-0.25	7.48	0.46612	0.35	7.95	0.09803	-0.17	7.69	1	-0.17
	THC0290_0404	494527	495138	1	CDS		Protein of unknown function	THC0290_v2_0419		-0.07	8.84	0.62155	-0.33	8.71	0.07019	-0.3	8.76	0.37266	-1.36	8.53	0.00158	0.29	9.28	0.21668	1.26	9.01	0.08303	1.55	9.16	0.03023	1.93	9.35	0.03602	-0.19	8.81	0.65083	-0.12	8.85	0.80763	0.21	9.01	0.59011	-0.21	8.86	0.18185	-0.03	8.95	1	-0.3
	THC0290_0405	495160	496668	1	CDS		Protein of unknown function	THC0290_v2_0420		-0.47	9.58	0.05402	-1.73	8.95	0.00492	-0.46	9.57	0.03038	-1.05	9.38	0.00302	0.46	10.2	0.08349	0.46	7.86	0.14528	0.44	7.85	0.47978	0.8	8.03	0.07058	-0.33	9.64	0.26349	-0.27	9.67	0.23035	0.24	9.92	0.20988	-0.55	9.53	0.01172	0.03	9.83	1	-0.08
	THC0290_N_0295	496366	496703	-1	Region	3prime	new TR			0.06	6.03	0.75618	-0.59	5.71	0.47891	-0.17	6.07	0.72363	-0.18	5.03	0.84488	-0.07	5.8	0.88274	0.23	4.05	0.56394	1.33	4.6	0.34736	1.56	4.72	0.40149	-0.25	6.03	0.73246	-0.17	6.07	0.77364	-0.31	6	0.52585	0.09	5.47	0.54711	0.34	5.59	1	-0.17
kdtA	THC0290_0406	496704	497933	-1	CDS		3-deoxy-D-manno-octulosonic-acid transferase	THC0290_v2_0421	waaA	-0.34	8.49	0.06563	-0.1	8.61	0.54531	-0.25	8.52	0.21475	-1.63	7.57	0.00334	0.09	8.49	0.75718	-0.19	7.27	0.74828	-1.61	6.56	0.08802	-0.58	7.07	0.63245	-0.04	8.62	0.90075	-0.03	8.63	0.9336	0.08	8.68	0.72187	-0.19	8.48	0.26682	-0.02	8.57	1	-0.13
	THC0290_N_0296	498014	498078	1	Region	5prime	new TR			0.15	11.73	0.73626	0.54	11.93	0.0887	-0.23	11.64	0.1548	-2.54	11.34	0.00084	0.16	11.86	0.56878	0.22	11.29	0.68603	0.63	11.49	0.26718	1.42	11.89	0.07751	0.02	11.76	0.95003	-0.42	11.55	0.1142	-0.51	11.5	0.07394	-0.21	11.92	0.31943	-0.11	11.97	1	-0.11
porR	THC0290_0407	498079	499212	1	CDS		PorR protein, probably involved in biosynthesis of cell surface polysaccharide	THC0290_v2_0422	porR	-0.19	12.7	0.34528	-0.63	12.48	0.04388	-0.17	12.74	0.23764	-1.97	12.27	0.00066	0.11	12.88	0.63625	-0.21	11.44	0.58941	0.14	11.61	0.47466	0.24	11.66	0.39947	-0.08	12.78	0.72961	-0.2	12.72	0.40574	-0.46	12.59	0.07347	-0.3	12.65	0.07401	0.06	12.83	1	0.25
	THC0290_N_0297	499213	499323	1	Region	intra	new TR			-0.16	11.72	0.36624	0.16	11.88	0.29236	-0.27	11.59	0.15419	-1.66	11	0.00058	0.05	11.73	0.79788	0.09	10.43	0.67239	0.05	10.41	0.82943	0.98	10.87	0.07048	-0.1	11.68	0.72527	-0.33	11.56	0.20223	-0.52	11.47	0.07945	-0.26	11.47	0.06758	0.1	11.65	1	0.02
galE	THC0290_0408	499324	500355	1	CDS		UDP-glucose 4-epimerase	THC0290_v2_0423	galE	-0.52	11.59	0.0343	-1.69	11.01	0.00167	-0.44	11.64	0.03653	-0.95	11.2	0.00227	-0.02	11.69	0.9389	-0.54	9.19	0.37945	-0.55	9.19	0.17544	-1.16	8.88	0.41797	-0.21	11.75	0.43311	-0.29	11.72	0.22796	-0.55	11.59	0.03816	-0.51	11.47	0.01913	-0.11	11.67	1	0.06
	THC0290_N_0298	500352	500565	-1	Region	3prime-PT	new TR			2.47	8.03	0.00669	4.35	8.97	0.00082	1.09	7.33	0.03038	0.21	7.5	0.70503	0.25	7.28	0.29138	2.36	9.84	0.08318	1.94	9.63	0.03069	1.7	9.51	0.14689	-0.15	6.71	0.75613	0.25	6.91	0.45607	0.88	7.23	0.05568	1.48	8.27	0.00523	-0.25	7.41	1	-0.34
	THC0290_N_0299	500356	500589	1	Region	3prime	new TR			0.02	11.11	0.9615	-1.17	10.51	0.00424	-0.33	10.88	0.08119	-0.13	10.47	0.33885	-0.08	10.95	0.70581	-0.93	8.15	0.63453	-0.2	8.52	0.82107	-1.26	7.98	0.59282	-0.43	10.83	0.16996	-0.42	10.83	0.12033	-0.68	10.71	0.05347	-0.67	10.19	0.00861	0.13	10.59	1	-0.27
	THC0290_0409	500600	500857	-1	CDS		Hypothetical lipoprotein precursor	THC0290_v2_0424		1.62	13.69	0.05831	2.06	13.92	0.00302	0.11	12.91	0.62719	-2.11	12.9	0.00072	0.38	13.65	0.1574	1.19	13.96	0.22695	1.03	13.88	0.2694	1.2	13.97	0.28414	-0.12	12.79	0.71652	-0.02	12.84	0.94573	-0.36	12.67	0.18855	-0.21	12.97	0.19287	0.12	13.13	1	-0.29
	THC0290_N_0301	500882	501008	-1	Region	intra	new TR			-1.45	11.05	0.00627	-1.79	10.88	0.00118	-1.03	11.12	0.00932	-1.56	10.04	0.00085	0.04	11.39	0.84692	0.1	9.75	0.6863	-0.06	9.67	0.7523	-0.15	9.63	0.82238	0.09	11.68	0.74505	-0.03	11.63	0.91499	-0.84	11.22	0.01566	-0.5	11.44	0.02349	0.04	11.7	1	0.19
fabD	THC0290_0410	501009	501881	-1	CDS		Malonyl CoA-acyl carrier protein transacylase	THC0290_v2_0425	fabD	-1.73	10.79	0.0039	-2	10.66	0.00142	-0.89	10.96	0.01308	-1.36	10.25	0.00107	0.1	11.23	0.58648	0.06	9.52	0.83771	0.42	9.7	0.23427	0.29	9.64	0.42488	0.2	11.5	0.51018	0.17	11.48	0.48426	-0.51	11.15	0.05487	-0.37	11.29	0.03173	0.09	11.52	1	0.08
	THC0290_N_0303	501925	502073	-1	Region	intra	new TR			-1.25	8.34	0.00344	-2.03	7.95	0.00337	-0.32	8.44	0.41934	0.61	7.71	0.05378	-0.02	8.58	0.97122	0.25	6.88	0.74911	-0.6	6.45	0.69986	0.6	7.05	0.71025	0.63	8.91	0.31396	0.77	8.98	0.14977	0.01	8.6	0.99067	-0.01	9.75	0.96614	0.06	9.79	1	0.02
	THC0290_0411	502074	502397	-1	CDS		Hypothetical protein precursor	THC0290_v2_0426		-0.89	8.36	0.01511	-0.96	8.33	0.00967	-0.07	8.5	0.88597	-0.44	7.64	0.07103	-0.21	8.76	0.58243	0.82	7.97	0.14547	1.14	8.13	0.03498	-1.14	6.99	0.05052	0.89	8.98	0.20198	0.86	8.96	0.15111	0.29	8.67	0.56325	0.06	9.94	0.87882	-0.07	9.88	1	-0.17
	THC0290_0412	502402	502551	-1	CDS		Hypothetical protein	NA		-0.78	8.97	0.01675	-0.76	8.98	0.01592	-0.19	8.76	0.70792	-0.35	8.41	0.02605	-0.25	8.99	0.54875	1.6	8.64	0.08303	2.23	8.95	0.03606	1.71	8.69	0.04074	0.79	9.25	0.3019	0.86	9.29	0.18037	0.21	8.96	0.72717	0.22	10.22	0.42203	0.06	10.14	1	-0.17
purT	THC0290_0413	502554	503726	-1	CDS		Phosphoribosylglycinamide formyltransferase 2	THC0290_v2_0428	purT	-0.65	9.24	0.02974	-0.65	9.23	0.02837	0.1	9.13	0.89015	-0.04	8.39	0.74365	-0.33	9.17	0.59501	0.11	7.54	0.87095	0.33	7.65	0.80394	0.25	7.61	0.62813	1.03	9.59	0.29083	1.3	9.73	0.14341	0.17	9.16	0.848	0.37	10.96	0.09061	0.2	10.87	1	0.04
aspC1	THC0290_0414	503894	505081	-1	CDS		Probable aspartate transaminase AspC1	THC0290_v2_0429	aspC1	-0.64	12.87	0.05423	-0.88	12.75	0.01113	-0.54	12.71	0.23101	-1.04	11.77	0.01181	0.09	13.14	0.82017	0.35	11.6	0.32786	0.55	11.7	0.25811	0.14	11.5	0.65331	0.18	13.07	0.735	0.1	13.03	0.85991	-0.31	12.83	0.59134	-0.23	13.28	0.13304	-0.04	13.37	1	0
	THC0290_0415	505149	506246	-1	CDS		Fatty acid desaturase	THC0290_v2_0430		0.27	11.42	0.16767	0.36	11.46	0.08307	0.26	11.5	0.11229	-0.59	11.45	0.00856	-0.01	11.22	0.98881	0.01	11.9	0.98739	-0.29	11.75	0.20582	-0.13	11.83	0.73698	0.56	11.65	0.11337	0.63	11.69	0.05941	0.12	11.43	0.43952	0.21	11.57	0.14635	0.01	11.47	1	-0.14
gidB	THC0290_0416	506352	506981	1	CDS		Methyltransferase GidB	THC0290_v2_0431	gidB	1.07	9.97	0.00873	1.93	10.4	0.00133	0.77	9.83	0.01941	-0.94	10	0.00757	-0.27	9.72	0.26424	0.02	10.51	0.95927	0.42	10.71	0.1743	1.09	11.04	0.05123	0.48	9.68	0.14122	0.69	9.79	0.06479	-0.15	9.37	0.56393	0.63	10.01	0.03514	0.02	9.7	1	-0.16
	THC0290_N_0304	506982	507043	1	Region	3prime	new TR			1.45	5.95	0.03739	2.3	6.37	0.00224	1.28	6.15	0.04586	0.19	5.46	0.50338	0.34	5.35	0.39326	-0.44	14.38	0.9178	-2.12	13.55	0.35144	1.49	15.35	0.42809	0.07	5.54	0.93908	0.6	5.81	0.10851	0.02	5.52	0.97973	0.88	5.79	0.06912	-0.24	5.22	1	-0.07
pruA	THC0290_0417	507058	508683	-1	CDS		1-pyrroline-5-carboxylate dehydrogenase	THC0290_v2_0432	pruA	0.77	14.21	0.01345	1.02	14.34	0.0088	0.75	13.98	0.04047	-0.9	14.23	0.00208	-0.1	14.33	0.57727	-0.55	13.34	0.29942	-0.66	13.29	0.05215	-0.6	13.31	0.17178	0	13.61	1	0.03	13.62	0.9519	-0.14	13.54	0.62762	0.15	14.27	0.32333	0.08	14.23	1	0.15
	THC0290_N_0306	508684	508742	-1	Region	5prime	new TR			1.23	13.82	0.12686	1.47	13.94	0.03957	0.68	13.49	0.09194	-0.47	13.6	0.23835	0.07	13.82	0.83462	0.76	13.54	0.35683	0.96	13.64	0.14945	1.3	13.81	0.15939	-0.04	13.13	0.93011	-0.03	13.13	0.96265	-0.52	12.89	0.18257	0.01	13.89	0.97053	0	13.89	1	-0.38
apaG	THC0290_0418	509450	509836	-1	CDS		Protein ApaG	THC0290_v2_0434	apaG	1.26	12.61	0.02624	1.08	12.52	0.01211	0.36	12.52	0.19496	1.27	12.87	0.00426	0.13	12.48	0.68278	1.36	13.25	0.09046	2.68	13.91	0.02963	2.95	14.04	0.03738	-0.73	11.98	0.06905	-0.74	11.97	0.10514	0.29	12.49	0.22379	0.23	12.54	0.44448	0.01	12.43	1	-0.19
	THC0290_0419	509904	511157	-1	CDS		Protein of unknown function precursor	THC0290_v2_0435		0.09	9.73	0.75618	0.38	9.87	0.10391	-0.4	9.83	0.07358	-0.39	9.64	0.15122	0.32	9.68	0.27698	0.07	11	0.91162	0.45	11.19	0.28248	0.14	11.04	0.7583	-0.61	9.73	0.08426	-0.78	9.65	0.07041	1.33	10.7	0.01409	-0.34	9.32	0.0577	0.13	9.55	1	-0.08
	THC0290_0420	511214	511990	-1	CDS		Probable methyltransferase	THC0290_v2_0436		-0.77	9.8	0.00957	-0.87	9.74	0.01797	-0.44	10.07	0.05553	-0.15	8.65	0.21115	0.05	9.66	0.84483	0.07	8.44	0.83025	-1	7.9	0.28044	-0.37	8.22	0.75253	-0.16	10.21	0.61929	-0.21	10.19	0.39354	-0.44	10.08	0.10152	-0.75	9.49	0.0075	-0.04	9.85	1	0.11
	THC0290_0421	511991	512515	-1	CDS		Hypothetical protein	THC0290_v2_0437		-0.84	10.27	0.01969	-0.42	10.48	0.04816	-0.26	10.66	0.13034	0.01	9.49	0.96711	0.19	10.14	0.37307	-0.16	9.8	0.61544	-0.73	9.51	0.10173	0.03	9.89	0.94766	-0.17	10.71	0.48289	-0.15	10.71	0.51856	-0.43	10.57	0.07684	-0.35	10.06	0.04213	0.02	10.24	1	0.02
	THC0290_0422	512508	513815	-1	CDS		Protein of unknown function	THC0290_v2_0438		-0.56	11.68	0.03607	-0.54	11.69	0.04691	-0.13	11.94	0.48004	0.65	11.23	0.02883	0.17	11.54	0.50931	0.05	11.26	0.88257	-0.06	11.21	0.7847	0	11.24	0.99589	-0.1	11.96	0.73984	0.05	12.03	0.87748	-0.57	11.72	0.08864	-0.1	11.59	0.41871	0.04	11.65	1	-0.04
	THC0290_N_0307	513830	513903	-1	Region	intra	new TR			-0.8	9.56	0.04058	0.15	10.03	0.3798	-0.03	10	0.86504	1.55	9.56	0.0008	0.29	9.49	0.24392	0.05	10.16	0.92395	-0.93	9.67	0.03851	-3.18	8.54	0.16037	0.22	10.12	0.37227	0.42	10.22	0.12562	-0.34	9.84	0.13278	-0.11	9.73	0.66104	-0.08	9.74	1	0.26
map	THC0290_0423	513904	514722	-1	CDS		Methionine aminopeptidase	THC0290_v2_0439	map	0.14	11.96	0.40873	0.63	12.21	0.09477	-0.03	12.02	0.83579	1.09	12.05	0.00212	0.1	11.71	0.56878	0.36	12.15	0.20908	0.64	12.29	0.06685	0.81	12.37	0.11256	0.22	12.14	0.39244	0.17	12.12	0.43155	-0.58	11.75	0.02882	-0.02	11.77	0.86031	0.07	11.82	1	-0.04
	THC0290_0424	514770	516161	-1	CDS		Probable outer membrane efflux protein precursor	THC0290_v2_0440		-0.3	8.21	0.12552	1.03	8.87	0.0367	0.33	8.71	0.47394	3.89	10.27	0.00053	0.04	8.28	0.88556	0.62	11.64	0.14219	-0.29	11.19	0.30742	-2.32	10.17	0.03738	0.52	8.81	0.19098	-0.09	8.5	0.7793	0.06	8.58	0.85521	-0.1	8.46	0.66564	0.1	8.57	1	-0.22
	THC0290_0425	516165	517523	-1	CDS		Probable ABC-type transport system, membrane fusion efflux protein component	THC0290_v2_0441		0.23	8.8	0.12439	1.82	9.59	0.0018	0.18	9.12	0.62353	3.24	10.78	0.00053	0.22	8.63	0.41048	1.13	12.72	0.10192	-0.1	12.11	0.80801	-2.5	10.9	0.03738	0.4	9.22	0.2039	0.11	9.08	0.69565	0	9.02	0.99101	-0.1	9.23	0.42869	0.06	9.31	1	-0.31
	THC0290_0426	517529	519190	-1	CDS		Probable ABC-type transport system, ATPase and permease components	THC0290_v2_0442		0.08	8.59	0.76789	1.93	9.51	0.00175	0.36	9	0.44297	3.11	10.42	0.00053	0.13	8.47	0.49699	1.08	12.77	0.14218	-0.26	12.1	0.59135	-3.03	10.71	0.03739	0.6	9.12	0.09267	0.14	8.89	0.66854	0.18	8.91	0.51025	0.29	9.44	0.12073	0.06	9.33	1	-0.25
	THC0290_0427	519196	519870	-1	CDS		Probable transcriptional regulator, TetR family	THC0290_v2_0443		-0.34	7.58	0.1583	2.25	8.88	0.00717	0.29	8.23	0.58538	2.63	8.18	0.00165	0.14	7.51	0.48011	2.11	12.82	0.08318	2.44	12.99	0.03228	-0.29	11.62	0.56797	0.21	8.18	0.47006	-0.05	8.05	0.86728	-0.2	7.98	0.59696	1.13	9.17	0.00311	0.11	8.66	1	-0.25
cat2	THC0290_0428	520020	521288	1	CDS		4-hydroxybutyrate coenzyme A transferase	THC0290_v2_0444	cat2	0.62	11.69	0.06048	1.35	12.05	0.00226	0.64	11.54	0.01681	-0.61	11.69	0.00449	0.08	11.81	0.68595	-0.27	11.93	0.30707	-0.4	11.86	0.09727	-0.2	11.96	0.60704	-0.46	10.98	0.13096	-0.46	10.98	0.15131	0.67	11.55	0.02461	0.65	11.69	0.00805	-0.09	11.32	1	0.13
	THC0290_0429	521589	522020	1	CDS		Hypothetical transmembrane protein	THC0290_v2_0445		1.73	8.92	0.00304	2.62	9.37	0.00088	1.06	8.3	0.01049	0.25	8.2	0.24829	-0.38	8.12	0.11876	-0.17	9.32	0.65137	-0.24	9.29	0.63234	0.24	9.52	0.57211	0.9	8.22	0.05176	1.28	8.41	0.03462	0.99	8.26	0.01914	1.57	8.95	0.00548	0.17	8.25	1	0.04
	THC0290_N_0309	522021	522213	1	Region	3prime	new TR			2.67	9.98	0.00482	2.95	10.12	0.00085	1.08	9.27	0.02348	0.92	9.21	0.01332	-0.3	9.12	0.18168	0.05	10.23	0.81698	-0.06	10.17	0.82159	0.59	10.5	0.27684	0.86	9.16	0.08211	1.27	9.37	0.0374	1.25	9.36	0.01996	1.75	9.83	0.00216	0.04	8.98	1	-0.24
	THC0290_N_0310	522214	522414	1	Region	3prime-PT	new TR			1.24	8.64	0.00565	0.68	8.36	0.07886	0.39	8.24	0.17129	1.25	7.93	0.00865	-0.18	7.93	0.47734	-1.34	8.27	0.49179	-1.47	8.21	0.12632	0.34	9.11	0.41581	1.12	8.61	0.06035	1.29	8.69	0.0374	0.88	8.49	0.03711	1.5	8.89	0.00668	0.06	8.16	1	0.04
	THC0290_0430	522415	524397	1	CDS		Cation-transporting ATPase, P-type	THC0290_v2_0447		1.63	10.35	0.00298	2.5	10.79	0.00086	0.78	9.84	0.04465	0.76	11.74	0.00304	0.17	10.6	0.40534	0.73	12.59	0.13657	0	12.22	0.99592	-0.8	11.82	0.12245	0.03	9.46	0.94096	-0.23	9.33	0.48234	1.11	10	0.02616	1.27	10.57	0.00421	-0.07	9.91	1	-0.06
	THC0290_N_0311	524398	524889	1	Region	intra	new TR			1.48	8.12	0.00339	2.7	8.73	0.00109	0.68	7.85	0.02696	2.14	9.97	0.00054	0.09	8.13	0.77819	0.88	10.59	0.11626	0.11	10.21	0.68441	-1.11	9.6	0.20788	-0.5	7.26	0.09544	-0.41	7.31	0.15786	0.92	7.97	0.01747	1.2	8.15	0.00407	0	7.55	1	-0.01
	THC0290_miscRNA_0002	524890	524985	1	misc_RNA		TPP riboswitch [THI element]			1.63	9.79	0.01262	3.13	10.55	0.00081	-0.41	9.21	0.0401	0.07	11.55	0.53196	0.07	9.27	0.70779	1.69	12.15	0.08303	2.18	12.39	0.02861	2.24	12.42	0.03602	-0.04	9.39	0.91012	-0.2	9.31	0.39402	-0.1	9.36	0.51366	0.79	9.63	0.02445	0.23	9.35	1	-0.29
	THC0290_N_0312	524986	525051	1	Region	intra	new TR			1.42	9.55	0.00339	3.22	10.44	0.00078	-0.49	9.32	0.04604	-0.35	12.55	0.07575	-0.15	9.08	0.63238	1.1	11.82	0.09273	1.89	12.21	0.03945	1.9	12.22	0.07297	-0.05	9.54	0.86254	-0.16	9.48	0.51942	0	9.56	0.99352	0.78	9.9	0.00743	0.19	9.6	1	-0.07
thiS	THC0290_0431	525052	525258	1	CDS		Thiamine biosynthesis protein ThiS	THC0290_v2_0448	thiS	0.69	7.1	0.01113	3.06	8.28	0.00078	0.1	7.44	0.52855	-0.44	11.24	0.01675	-0.08	6.86	0.74941	1.47	10.03	0.08303	1.83	10.22	0.03009	1.02	9.81	0.0738	0.36	7.57	0.18216	0.31	7.54	0.20055	0.41	7.59	0.08619	1.15	7.81	0.0051	0.03	7.25	1	-0.07
	THC0290_N_0313	525259	525356	1	Region	intra	new TR			0.77	6.11	0.01132	3.37	7.41	0.00081	0.17	6.84	0.42696	-0.48	10.41	0.00844	-0.04	5.93	0.94555	0.98	8.85	0.11804	0.35	8.53	0.38843	-0.03	8.35	0.96108	0.35	6.94	0.25761	0.15	6.84	0.58701	0.35	6.94	0.27404	1.07	7.27	0.00934	0.19	6.82	1	0.04
thiC	THC0290_0432	525357	527180	1	CDS		Thiamine biosynthesis protein ThiC	THC0290_v2_0449	thiC	0.33	7.97	0.09227	2.41	9.01	0.00109	-0.13	8.27	0.73869	-0.78	12.61	0.00266	-0.15	7.88	0.49462	0.06	9.5	0.87319	-0.31	9.31	0.39842	-0.83	9.05	0.14652	0.81	8.74	0.15734	0.6	8.63	0.22038	0.57	8.62	0.24755	0.7	8.75	0.02087	0.06	8.43	1	0.2
	THC0290_N_0314	527181	527231	1	Region	intra	new TR			0.05	6.83	0.7872	2.01	7.81	0.00164	0.03	7.37	0.95168	-0.48	11.57	0.01582	-0.11	6.86	0.77746	-1.07	7.12	0.09088	-2.17	6.57	0.26972	-2.64	6.34	0.03738	0.69	7.7	0.17442	0.67	7.69	0.18862	0.5	7.61	0.25807	0.42	7.9	0.08306	-0.05	7.66	1	0.25
thiE1	THC0290_0433	527232	527831	1	CDS		Thiamine-phosphate diphosphorylase	THC0290_v2_0450	thiE1	0.02	7.1	0.9055	1.26	7.73	0.00813	0.12	7.61	0.63179	-0.32	11.83	0.03951	-0.1	7.16	0.79058	-0.31	7.41	0.37725	-2.03	6.55	0.23989	-2.27	6.43	0.22811	0.67	7.88	0.12167	0.69	7.89	0.10085	0.51	7.8	0.15595	0.58	8.03	0.01453	-0.09	7.69	1	0.15
thiD	THC0290_0434	527804	528562	1	CDS		Phosphomethylpyrimidine kinase	THC0290_v2_0451	thiD	0.04	6.78	0.76622	0.58	7.06	0.013	0.04	7.35	0.9091	-0.28	11.33	0.10407	-0.07	6.62	0.74691	-1.36	6.2	0.08385	-0.26	6.75	0.40422	0.01	6.89	0.99893	0.61	7.64	0.18661	0.46	7.56	0.26725	0.21	7.44	0.56325	0.53	7.58	0.02195	-0.09	7.27	1	-0.07
thiE2	THC0290_0435	528555	529175	1	CDS		Thiamine-phosphate diphosphorylase	THC0290_v2_0452	thiE2	-0.09	7.06	0.51731	0.06	7.14	0.76533	0.29	7.51	0.27104	0.09	11.39	0.47777	-0.13	6.95	0.62296	0.7	7.76	0.49925	-0.72	7.05	0.65604	0.76	7.79	0.60884	0.75	7.74	0.10948	0.6	7.66	0.11768	0.49	7.61	0.17663	0.59	7.75	0.02076	0.1	7.5	1	0.17
thiG	THC0290_0436	529175	529945	1	CDS		Thiazole biosynthesis protein ThiG	THC0290_v2_0453	thiG	-0.03	7.09	0.83816	0.57	7.39	0.0183	0.03	7.58	0.87061	0.15	11.54	0.24366	-0.19	7.1	0.33519	-0.79	6.71	0.08417	-1.03	6.59	0.04599	-1.22	6.49	0.46354	0.37	7.75	0.21322	0.36	7.75	0.1851	0.37	7.75	0.20784	0.19	7.76	0.23266	-0.05	7.64	1	-0.03
	THC0290_N_0315	529946	530070	1	Region	intra	new TR			-0.39	7.28	0.06975	0.44	7.7	0.09628	0.21	7.73	0.62709	0.25	11.35	0.19201	-0.02	7.42	0.91342	-0.2	7.28	0.84029	1.13	7.95	0.14153	-0.49	7.14	0.60338	0.41	7.83	0.45142	0.28	7.76	0.61324	0.5	7.88	0.29821	0.37	7.9	0.03065	0.09	7.75	1	0.23
thiH	THC0290_0437	530071	531192	1	CDS		Thiazole biosynthesis protein ThiH	THC0290_v2_0454	thiH	-0.43	7.45	0.03409	0.18	7.75	0.64221	0.07	7.89	0.70414	0.54	11.5	0.01651	0.15	7.52	0.43345	-0.86	6.99	0.32815	-1.47	6.69	0.1889	-2.54	6.15	0.03738	0.41	8.06	0.19015	0.43	8.07	0.16185	0.41	8.06	0.19077	0.23	8.07	0.08482	-0.02	7.94	1	0.11
thiF	THC0290_0438	531214	531924	1	CDS		Molybdopterin and thiamine biosynthesis protein	THC0290_v2_0455	thiF	-0.4	7.09	0.05851	-0.59	7	0.03167	0.03	7.55	0.91332	1.14	11.08	0.00298	-0.09	7.08	0.69342	-1.22	5.85	0.24233	-1.72	5.6	0.0305	0.21	6.56	0.77119	0.43	7.75	0.22584	0.45	7.76	0.16949	0.39	7.73	0.1755	0.21	7.77	0.13314	-0.06	7.63	1	0.04
pyrH	THC0290_0439	531998	532705	1	CDS		UMP kinase	THC0290_v2_0456	pyrH	-0.42	12.17	0.03334	-0.37	12.2	0.07152	-0.24	12.39	0.13829	0.4	12.12	0.07316	0.07	12.04	0.70581	0.65	11.94	0.23818	1.59	12.41	0.02834	0.84	12.03	0.06915	0.09	12.56	0.69678	0.05	12.53	0.8531	-0.57	12.23	0.03277	-0.2	12.08	0.14403	0.1	12.23	1	0.02
frr	THC0290_0440	532752	533315	1	CDS		Ribosome recycling factor	THC0290_v2_0457	frr	-0.54	12.5	0.03664	-0.44	12.55	0.04212	-0.29	12.69	0.16497	0.21	12.25	0.09979	-0.01	12.3	0.98714	-0.07	12.08	0.7765	-0.34	11.94	0.12767	-0.44	11.9	0.18871	0.01	12.84	0.97306	-0.09	12.79	0.76368	-0.21	12.73	0.35302	-0.19	12.36	0.31097	0.04	12.48	1	-0.04
	THC0290_N_0318	533368	533474	1	Region	intra	new TR			-0.33	8.99	0.20142	0.91	9.61	0.13812	-0.58	9.23	0.02208	0.13	8.86	0.38023	0.18	8.95	0.65327	1.65	10.53	0.09046	2.35	10.88	0.04747	1.7	10.56	0.2573	0.47	9.76	0.14833	0.58	9.81	0.06497	-0.28	9.38	0.13574	0.08	9.13	0.50654	-0.12	9.03	1	-0.34
	THC0290_0441	533475	534557	1	CDS		Probable secreted exopolyphosphatase precursor	THC0290_v2_0458		-0.33	10.56	0.06317	0.22	10.83	0.17552	-0.09	10.74	0.65102	-0.11	10.4	0.45517	0.26	10.73	0.2713	0.36	11.03	0.18911	0.23	10.96	0.25443	0.59	11.14	0.18871	0.31	10.94	0.29306	0.4	10.98	0.1744	0.09	10.83	0.72682	0.02	10.4	0.88567	-0.06	10.36	1	-0.04
	THC0290_N_0319	534558	534754	1	Region	intra	new TR			0.73	10.77	0.18865	1.08	10.94	0.08296	0.27	11.22	0.17064	-0.47	10.78	0.0128	0.09	11.35	0.80242	0.28	11.51	0.30157	-0.35	11.19	0.1743	-0.47	11.13	0.3262	0.16	11.17	0.6013	0.28	11.23	0.31472	0.28	11.23	0.18905	-0.01	11.02	0.96477	-0.2	10.92	1	-0.34
	THC0290_0442	534755	535996	1	CDS		Major facilitator superfamily (MFS) permease	THC0290_v2_0459		-0.07	10	0.73283	0.75	10.41	0.00915	0.24	10.09	0.21696	0.61	10.3	0.0061	0.19	9.9	0.38707	0.14	10.59	0.53713	-0.08	10.47	0.66693	0.62	10.83	0.13894	0.22	10.08	0.40986	0.32	10.13	0.29605	0.26	10.1	0.24726	0.32	9.58	0.06967	0.17	9.51	1	-0.13
	THC0290_N_0320	535997	536054	1	Region	intra	new TR			0.16	8.98	0.48518	1.11	9.46	0.05465	0.15	9.11	0.34315	-0.37	8.7	0.07288	0.23	8.83	0.37372	0.39	9.49	0.24772	0.44	9.51	0.23008	1	9.79	0.25967	0.18	9.13	0.44698	0.26	9.17	0.26277	-0.14	8.97	0.42463	-0.06	8.7	0.71058	-0.08	8.68	1	-0.31
	THC0290_0443	536055	536963	1	CDS		Probable transmembrane protein of unknown function	THC0290_v2_0460		-0.2	9.66	0.25779	-0.74	9.39	0.30144	0.05	10	0.69906	-0.09	9.52	0.60156	0.32	9.75	0.43562	0.32	9.75	0.23602	0.63	9.9	0.06946	0.82	10	0.07012	0.13	10.04	0.56911	0.24	10.09	0.28032	-0.33	9.81	0.11786	-0.1	9.34	0.57546	0.2	9.49	1	0.1
	THC0290_N_0321	536964	537059	1	Region	intra	new TR			-0.48	8.13	0.08071	-0.67	8.04	0.01439	-0.27	8.37	0.30378	0.34	7.61	0.21311	0.19	8.08	0.40409	-0.03	7.17	0.89896	0.34	7.35	0.22548	1	7.69	0.11282	-0.18	8.42	0.59241	0.29	8.65	0.36495	-0.38	8.32	0.35351	-0.21	7.78	0.52641	0.03	7.89	1	0.05
	THC0290_0444	537060	539312	1	CDS		Probable outer membrane protein precursor	THC0290_v2_0461		-0.47	7.36	0.09795	-1	7.1	0.0063	-0.02	7.96	0.93729	-0.18	6.81	0.28804	0.25	7.39	0.36672	0.23	6.46	0.79233	-2.08	5.31	0.03776	0.56	6.63	0.18051	-0.36	7.79	0.25499	0.03	7.99	0.94591	-0.47	7.74	0.07217	-0.56	6.96	0.077	-0.12	7.18	1	-0.13
	THC0290_N_0322	539143	539314	-1	Region	3prime	new TR			1.66	8.71	0.00479	2.11	8.94	0.00173	0.77	8.37	0.02863	-1.59	7.86	0.00381	-0.39	8.6	0.21772	-0.41	8.73	0.41779	-1.16	8.35	0.06296	-1.5	8.18	0.33647	0.55	8.25	0.10931	0.53	8.24	0.09197	0.65	8.3	0.02597	0.57	8.27	0.01208	0.27	8.12	1	0.04
	THC0290_N_0323	539313	539818	1	Region	3prime	new TR			-0.04	4.61	0.93971	-0.11	4.57	0.85453	-0.66	4.27	0.26012	0.85	4.75	0.03345	-0.26	4.45	0.44405	-0.12	3.94	0.67068	-0.13	3.93	0.56815	-0.12	3.94	0.70236	-0.43	4.38	0.55	-0.44	4.38	0.51086	-0.11	4.55	0.8621	-0.35	4.16	0.05119	-0.22	4.22	1	-0.27
	THC0290_0445	539315	541585	-1	CDS		Probable Na+/H+ antiporter	THC0290_v2_0462		0.43	9.29	0.12439	0.7	9.42	0.01504	-0.52	8.84	0.02696	-1.1	8.62	0.00316	0	9.18	0.99815	0.59	9.61	0.10076	0.35	9.49	0.12487	0.62	9.63	0.11123	0.33	9.27	0.18585	0.23	9.22	0.28779	0.04	9.13	0.79076	0.15	9.08	0.19378	0.24	9.13	1	-0.16
	THC0290_0446	542293	542667	1	CDS		Protein of unknown function	THC0290_v2_0463		-0.57	10.19	0.09099	-0.56	10.2	0.09071	-1.7	9.81	0.00822	-2.24	10.68	0.00054	1.14	10.85	0.02851	0.16	12.44	0.66506	0.15	12.43	0.45313	0.75	12.73	0.07638	-0.56	10.38	0.18807	-0.41	10.45	0.21737	2.65	11.98	0.00575	-0.96	9.65	0.02871	0.16	10.21	1	-0.19
	THC0290_0447	542738	543226	-1	CDS		Acetyltransferase, GNAT family	THC0290_v2_0464		1.35	10.79	0.0041	1.1	10.66	0.00535	0.95	10.76	0.01003	0.6	11.21	0.00965	-0.08	10.68	0.74274	-0.42	10.72	0.24097	-0.71	10.57	0.07429	-0.42	10.72	0.45663	-0.23	10.17	0.36077	-0.17	10.2	0.48057	0.11	10.34	0.69991	0.63	10.74	0.0255	0.08	10.46	1	0.01
	THC0290_0448	543236	544480	-1	CDS		Major facilitator superfamily (MFS) permease	THC0290_v2_0465		0.57	10.57	0.02215	0.43	10.5	0.03874	0.74	10.55	0.0119	0.14	10.81	0.30517	-0.16	10.65	0.39563	-0.35	10.48	0.31164	-1.12	10.1	0.0446	-0.47	10.42	0.22718	0.07	10.22	0.76977	0.05	10.21	0.85779	0	10.18	0.99101	0.26	10.63	0.06199	0.02	10.51	1	0.11
ilvA	THC0290_0449	544671	545915	-1	CDS		Threonine ammonia-lyase	THC0290_v2_0466	ilvA	-0.04	7.14	0.79919	0.67	7.5	0.01413	-0.33	7.16	0.1355	0.69	8.55	0.00538	0.18	7.02	0.32626	0.07	9.18	0.76318	-0.34	8.98	0.17275	-0.81	8.74	0.15781	0.51	7.57	0.20182	0.53	7.58	0.11587	-0.45	7.09	0.06848	0.48	7.36	0.03302	-0.04	7.1	1	0.03
ilvC	THC0290_0450	545912	546958	-1	CDS		Ketol-acid reductoisomerase	THC0290_v2_0467	ilvC	-0.79	6.58	0.01735	-0.58	6.68	0.03302	-1.07	6.48	0.00946	0.86	8.92	0.00644	0.17	6.48	0.40037	0.19	9.17	0.60147	-2.07	8.04	0.05237	-1.77	8.18	0.04075	0.44	7.24	0.19567	0.43	7.23	0.15246	-0.44	6.8	0.05349	0.29	6.71	0.13594	-0.15	6.49	1	0.05
ilvH	THC0290_0451	546976	547506	-1	CDS		Acetolactate synthase, small subunit	THC0290_v2_0468	ilvH	-1.31	6.36	0.00804	-0.68	6.67	0.06044	-1.54	6.35	0.01068	1.84	9.01	0.00149	0.18	6.36	0.63619	0.37	9.07	0.25645	-2.43	7.66	0.38397	-1.66	8.05	0.29334	0.48	7.36	0.18177	0.38	7.31	0.15785	-0.42	6.91	0.08266	0.33	6.66	0.21364	-0.06	6.46	1	-0.07
ilvB	THC0290_0452	547513	549207	-1	CDS		Acetolactate synthase, large subunit	THC0290_v2_0469	ilvB	-1.59	5.93	0.00338	-0.41	6.52	0.28233	-1.64	5.89	0.01386	2.05	9.01	0.0006	0.54	5.88	0.07129	0.3	8.35	0.50034	-0.91	7.74	0.14736	-0.59	7.91	0.45254	0.55	6.99	0.15331	0.31	6.87	0.36408	-0.49	6.47	0.10599	0.22	6.34	0.45441	0.07	6.27	1	0.22
ilvD	THC0290_0453	549225	550901	-1	CDS		Dihydroxy-acid dehydratase	THC0290_v2_0470	ilvD	-1.08	6.28	0.00489	0	6.82	0.99999	-1.41	6.12	0.01068	2.41	8.5	0.00098	-0.09	6.14	0.79151	0.55	8.8	0.23344	0.1	8.58	0.91611	-2.34	7.36	0.04758	0.52	7.08	0.15191	0.41	7.02	0.12153	-0.3	6.67	0.14879	-0.12	6.2	0.40709	0.1	6.31	1	0
ilvE	THC0290_0454	550915	551790	-1	CDS		Branched-chain-amino-acid transaminase	THC0290_v2_0471	ilvE	-1.3	5.49	0.01173	-0.82	5.72	0.0335	-1.96	5.3	0.01036	2.04	7.61	0.00068	-0.15	5.37	0.49962	0.57	8.1	0.20908	-2.94	6.34	0.06127	-2.61	6.51	0.16976	0.54	6.55	0.12497	0.25	6.41	0.32074	-0.41	6.07	0.05941	-0.03	5.72	0.83516	-0.04	5.72	1	0.04
	THC0290_N_0324	551791	552228	-1	Region	5prime	new TR			-1.79	8.21	0.10716	0.26	9.23	0.75799	-0.83	8.83	0.01309	-0.56	7.6	0.0512	0.09	7.92	0.72781	0.64	10.1	0.3002	0.23	9.9	0.61599	-1.2	9.18	0.6076	-0.12	9.18	0.68916	-0.83	8.82	0.04397	-1.19	8.65	0.01869	-0.4	8.09	0.23776	0.42	8.5	1	-0.8
	THC0290_N_0325	552526	552622	1	Region	5prime	new TR			0.46	11.11	0.25856	-0.04	10.86	0.94446	-0.08	10.87	0.62305	-0.35	11.52	0.04092	0.27	11.75	0.47644	0.21	10.64	0.71222	0.77	10.92	0.07145	1.66	11.36	0.04582	-0.22	10.8	0.35032	-0.49	10.66	0.09733	0.89	11.35	0.02067	-0.23	11.15	0.14646	0.18	11.35	1	-0.32
	THC0290_0455	552623	553387	1	CDS		Protein of unknown function	THC0290_v2_0472		0.05	12.67	0.82516	-1.73	11.78	0.02242	-0.11	12.53	0.44297	-0.73	12.5	0.0207	0.24	13.38	0.48883	0.11	11.3	0.68275	0.47	11.48	0.14083	1.35	11.92	0.04733	-0.13	12.52	0.6982	-0.3	12.44	0.19273	0.91	13.04	0.01394	-0.75	12.4	0.00575	0.07	12.8	1	0.02
	THC0290_N_0326	553386	553649	-1	Region	3prime	new TR			-0.23	8.6	0.23223	-1.39	8.02	0.00175	0.39	9.01	0.09361	0.63	9.78	0.01151	-0.01	9	0.95573	-0.37	9.62	0.34988	-3.08	8.26	0.07127	-1.28	9.16	0.16037	-0.13	8.74	0.69931	-0.24	8.69	0.34313	0.78	9.2	0.03466	-0.13	8.77	0.48751	0.11	8.89	1	0.03
	THC0290_N_0328	553432	553812	1	Region	3prime-PT	new TR			1.64	8.37	0.01124	0.94	8.02	0.02428	0.16	7.91	0.38928	-1.12	6.49	0.00678	0.04	8.01	0.87765	1.06	7.17	0.08385	-0.06	6.61	0.96623	1.64	7.46	0.03973	-0.33	7.66	0.44421	0.09	7.88	0.89068	1.04	8.35	0.02738	0.83	8.23	0.02312	0.18	7.9	1	-0.07
	THC0290_0456	553650	554273	-1	CDS		Putative sensor (PAS) domain for methyl-accepting chemotaxis sensory transducer	THC0290_v2_0473		-0.69	10.4	0.05255	-2.77	9.36	0.00258	0.87	11.17	0.01336	-0.19	11.31	0.23629	0.24	11.23	0.38755	-0.53	10.41	0.25272	-1.89	9.73	0.04318	-0.64	10.35	0.51754	-0.41	10.52	0.35863	-0.03	10.71	0.91026	0.7	11.08	0.07945	-0.97	10.63	0.00797	-0.05	11.09	1	-0.22
tsf	THC0290_0457	554438	555262	-1	CDS		Elongation factor Ts (EF-Ts)	THC0290_v2_0474	tsf	-2.2	13.36	0.00201	-1.85	13.53	0.00336	-0.54	14.21	0.02576	-0.49	12.45	0.0429	0.02	13.62	0.94093	0.08	13.16	0.77579	-0.75	12.74	0.07379	-2.33	11.95	0.03826	0.14	14.55	0.55523	0.2	14.58	0.36616	-0.87	14.04	0.01956	-0.26	13.92	0.06277	0.02	14.06	1	-0.06
	THC0290_N_0331	555263	555363	-1	Region	intra	new TR			-2.59	12.69	0.00224	-1.87	13.06	0.00203	-0.43	13.65	0.03651	-0.56	11.94	0.01732	0.13	12.96	0.59265	0.03	12.62	0.92256	-0.92	12.14	0.07127	-3.2	11	0.06984	0.49	14.11	0.11887	0.33	14.03	0.17192	-0.65	13.54	0.02882	-0.47	13.39	0.01417	-0.02	13.61	1	0.04
rpsB	THC0290_0458	555364	556164	-1	CDS		30S ribosomal protein S2	THC0290_v2_0475	rpsB	-1.52	14.21	0.00298	-1.16	14.39	0.00281	-0.19	14.87	0.20433	0.07	13.63	0.56663	-0.01	14.36	0.98106	0.07	14.06	0.7765	-0.71	13.66	0.05237	-1.99	13.02	0.06851	0.06	14.99	0.79392	0.08	15	0.72257	-0.37	14.78	0.07561	-0.35	14.65	0.02891	-0.06	14.8	1	-0.05
	THC0290_N_0332	556165	556317	-1	Region	intra	new TR			-1.52	14.86	0.00339	-0.96	15.14	0.00555	-0.23	15.45	0.15597	0.32	14.29	0.0485	-0.02	15.14	0.94074	-0.06	14.65	0.85826	-0.56	14.4	0.15411	-1.65	13.85	0.05411	0.04	15.59	0.86867	-0.07	15.53	0.77413	-0.26	15.44	0.22465	-0.42	15.17	0.03815	-0.08	15.34	1	0.04
rpsI	THC0290_0459	556318	556704	-1	CDS		30S ribosomal protein S9	THC0290_v2_0476	rpsI	-1.14	14.72	0.00438	-0.49	15.05	0.02503	-0.15	15.32	0.32581	0.18	14.29	0.20212	0.04	14.98	0.84367	0.06	14.86	0.87012	-0.42	14.62	0.23776	-1.31	14.17	0.05653	-0.04	15.37	0.88554	-0.09	15.35	0.71752	-0.18	15.3	0.32116	-0.33	15.11	0.04089	-0.02	15.27	1	0.06
rplM	THC0290_0460	556704	557159	-1	CDS		50S ribosomal protein L13	THC0290_v2_0477	rplM	-1.14	14.46	0.0038	-0.28	14.89	0.16007	-0.22	14.98	0.21728	0.3	14.16	0.06452	-0.03	14.61	0.92064	0.64	14.82	0.12441	0.34	14.68	0.29702	-0.39	14.31	0.29996	0.02	15.11	0.94156	0.06	15.12	0.83773	-0.33	14.93	0.13922	-0.37	14.79	0.02555	0.1	15.02	1	0.07
nrdA	THC0290_0461	557960	560380	-1	CDS		Ribonucleoside-diphosphate reductase, alpha subunit	THC0290_v2_0479	nrdA	-0.7	12.75	0.00841	-0.41	12.89	0.0619	-0.6	12.78	0.08387	-0.7	12.55	0.00322	0.22	12.76	0.36672	-0.36	12.55	0.22578	-0.69	12.38	0.05294	-1.43	12.01	0.04555	-0.14	13.01	0.70603	-0.18	12.99	0.58377	-0.79	12.68	0.06731	0.03	12.84	0.81603	0.03	12.84	1	0.02
	THC0290_N_0333	560381	560718	-1	Region	intra	new TR			-0.73	12.92	0.04793	-0.6	12.98	0.10547	-0.57	13.14	0.01933	-0.96	11.87	0.00168	0.14	12.89	0.60284	0	12.73	0.99876	-0.52	12.47	0.14786	-0.32	12.57	0.60704	-0.18	13.34	0.47169	-0.49	13.19	0.10164	-1.08	12.89	0.0151	-0.03	12.9	0.81903	-0.11	12.86	1	0.25
nrdB	THC0290_0462	560719	561696	-1	CDS		Ribonucleoside-diphosphate reductase, beta subunit	THC0290_v2_0480	nrdB	-0.9	12	0.04782	-0.41	12.25	0.13041	-0.4	12.14	0.06131	-1.09	11.24	0.00201	0.18	12.02	0.43475	0	11.86	0.99804	-0.78	11.47	0.05215	-1.16	11.28	0.04889	0.14	12.41	0.58947	-0.16	12.26	0.48068	-0.78	11.95	0.01956	-0.01	11.91	0.93226	0.1	11.96	1	0.15
	THC0290_N_0334	561697	561746	-1	Region	5prime	new TR			0.03	4.12	0.85893	0.45	4.33	0.39625	-0.32	4.26	0.31592	-0.2	3.96	0.09944	-0.01	4.05	0.99169	3.1	5.53	0.08303	4.32	6.14	0.02931	3.27	5.62	0.10936	-0.49	4.18	0.24871	-0.12	4.37	0.77754	-0.35	4.25	0.38668	0.17	4.22	0.43535	-0.17	4.05	1	-0.17
	THC0290_0463	561944	562513	-1	CDS		Protein of unknown function	THC0290_v2_0481		-0.26	10.06	0.15446	1.09	10.74	0.00482	-0.89	10.1	0.01028	0.6	9.86	0.00607	0.17	9.77	0.40448	0.77	11.11	0.0986	0.08	10.77	0.74772	-0.41	10.52	0.35373	0.16	10.62	0.58632	0.2	10.64	0.4791	-0.74	10.17	0.0184	0.02	10.13	0.92059	-0.12	10.06	1	0.05
	THC0290_0464	562739	563317	1	CDS		MarC family integral membrane protein	THC0290_v2_0483		0.19	11.04	0.26304	0.81	11.35	0.00714	0.3	11.1	0.07982	0.88	11.37	0.00279	-0.18	10.94	0.38707	0.01	11.41	0.98895	0.16	11.49	0.77628	0.22	11.52	0.42856	-0.45	10.72	0.11724	-0.53	10.68	0.10599	0.43	11.16	0.06209	0.29	11.16	0.1266	0.04	11.04	1	-0.19
	THC0290_0465	563356	563559	1	CDS		Hypothetical protein	THC0290_v2_0484		0.23	12.09	0.20459	0.69	12.31	0.01239	0.12	12.07	0.60934	0.38	12.24	0.02343	-0.16	11.93	0.44174	0.89	13.9	0.09504	1.44	14.17	0.03009	1.39	14.15	0.0511	-0.08	11.97	0.81827	0.03	12.03	0.94065	0.42	12.22	0.22061	0.35	12.09	0.03264	0.07	11.95	1	0.04
	THC0290_0466	563559	564167	1	CDS		Putative pyridine nucleotide-disulphide oxidoreductase, class-II family protein	THC0290_v2_0485		0.2	10.92	0.22868	0.55	11.1	0.05004	-0.04	10.83	0.84158	0.55	11.45	0.01165	-0.23	10.66	0.48064	0.76	12.9	0.19988	0.66	12.85	0.1039	0.59	12.81	0.27783	0.02	10.86	0.93962	0.06	10.88	0.82914	0.58	11.14	0.06671	0.35	10.81	0.06888	0.04	10.65	1	-0.02
	THC0290_N_0335	563975	564212	-1	Region	3prime	new TR			0.11	6.6	0.79782	0.37	6.73	0.30888	-0.2	6.89	0.24169	-0.19	5.89	0.81489	0.24	6.7	0.27698	1.82	5.98	0.25055	0.83	5.49	0.29957	3.78	6.96	0.0402	-0.25	6.87	0.51365	-0.2	6.89	0.42275	-0.64	6.67	0.02684	-1.06	6.26	0.0042	-0.25	6.67	1	-0.03
	THC0290_N_0336	564168	564864	1	Region	3prime	new TR			-0.52	8.14	0.32646	1.04	8.92	0.02625	-0.18	8.34	0.32245	2.37	9.01	0.00165	0.11	7.96	0.77782	1.16	10.43	0.15792	0.76	10.23	0.16753	0.2	9.95	0.69659	-0.12	8.37	0.70431	-0.13	8.36	0.64308	0.35	8.6	0.21026	0.48	8.11	0.15347	0.03	7.89	1	0.04
	THC0290_0467	564213	565787	-1	CDS		Probable membrane associated S41A family C-terminal processing peptidase	THC0290_v2_0486		-1.11	8.77	0.00368	-1.54	8.56	0.00379	-0.68	9.04	0.02371	0.16	8	0.5109	0.24	9.11	0.41568	0.3	7.87	0.28975	0.18	7.81	0.44878	0.04	7.74	0.94152	0.09	9.43	0.79471	0.02	9.39	0.97469	-0.1	9.34	0.73491	-1.01	8.52	0.00544	-0.01	9.01	1	-0.05
	THC0290_N_0337	565788	565860	-1	Region	intra	new TR			-0.82	10.62	0.10851	-0.94	10.56	0.01373	-1.01	10.44	0.01846	-1.03	10.31	0.00488	0.06	10.91	0.89026	0.9	10.31	0.17782	0.54	10.13	0.3053	1.08	10.4	0.17532	0.37	11.13	0.28338	0.16	11.02	0.60891	-0.25	10.82	0.38507	-1.12	10.13	0.00777	0.13	10.75	1	-0.5
	THC0290_0468	565861	566289	-1	CDS		dCMP deaminase	THC0290_v2_0487		-1.24	9.89	0.00619	-1.34	9.85	0.00379	-1.13	10.06	0.01472	-0.87	9.81	0.01103	0.22	10.46	0.36672	0.17	9.35	0.74333	0.05	9.28	0.91271	-0.9	8.81	0.11882	0.42	10.84	0.25363	0.22	10.74	0.57603	-0.18	10.54	0.64181	-1.31	9.83	0.00337	-0.1	10.43	1	-0.01
	THC0290_N_0338	566290	566469	-1	Region	intra	new TR			-0.13	9.98	0.71113	-0.17	9.96	0.24983	-0.55	9.7	0.10105	-1.1	9.08	0.01418	0.26	10.32	0.36672	0.84	9.92	0.17455	-0.04	9.48	0.96623	-1.49	8.76	0.06907	0.38	10.16	0.3873	0.16	10.05	0.66651	0.38	10.16	0.27068	-0.98	9.56	0.04666	0.16	10.13	1	-0.29
	THC0290_0469	566470	567063	-1	CDS		Probable transmembrane protein of unknown function	THC0290_v2_0488		-0.03	10.17	0.938	0.06	10.21	0.79825	-0.62	9.92	0.02719	-1.17	10.07	0.00304	0.23	10.6	0.41947	0.77	10.64	0.14855	0.7	10.6	0.19033	0.67	10.59	0.32922	0.35	10.41	0.26031	0.35	10.41	0.25902	0.2	10.33	0.54003	-0.99	9.9	0.01305	0.08	10.43	1	-0.22
	THC0290_N_0339	567081	567646	-1	Region	3prime-PT	new TR			3.09	6.58	0.00298	4.25	7.16	0.00078	1.11	5.92	0.02907	-0.17	6.85	0.66278	-0.42	6.03	0.35278	1.86	8.58	0.12567	1.96	8.63	0.12863	2.63	8.96	0.05531	-0.39	5.17	0.37064	-0.58	5.08	0.36407	-0.46	5.14	0.38507	1.75	6.52	0.03264	-0.09	5.59	1	0.2
	THC0290_0470	567208	567639	1	CDS		Protein of unknown function	THC0290_v2_0489		0.9	11.31	0.11913	1.77	11.74	0.00308	0.21	11.03	0.61616	0.34	11.63	0.02358	-0.02	10.94	0.9154	1.39	13.97	0.08318	2.1	14.32	0.02834	2.2	14.37	0.03552	0.21	11.03	0.69406	0.39	11.12	0.43859	0.63	11.24	0.24001	0.45	11.08	0.01934	-0.03	10.84	1	-0.49
uspA	THC0290_0471	567685	568509	-1	CDS		Universal stress protein UspA	THC0290_v2_0490	uspA	1.78	14.33	0.00298	1.18	14.03	0.0071	0.96	13.66	0.01043	-0.72	14.78	0.00698	-0.21	14.48	0.28783	0.37	14.44	0.20179	0.33	14.43	0.17145	0.9	14.71	0.06759	-0.29	13.03	0.31396	-0.33	13.01	0.31708	0.12	13.24	0.47789	0.26	13.98	0.13275	-0.08	13.82	1	0.1
	THC0290_N_0342	568510	568559	-1	Region	5prime	new TR			1.65	13.22	0.00339	1.48	13.13	0.00167	1.19	12.7	0.01125	-0.71	13.68	0.00745	0.08	13.62	0.69443	0.24	13.63	0.44172	0.8	13.91	0.07259	1.83	14.43	0.03602	-0.31	11.95	0.27817	-0.23	11.99	0.43093	0.16	12.18	0.42432	0.09	12.98	0.62027	-0.05	12.91	1	0.01
	THC0290_N_0343	568633	568691	1	Region	5prime	new TR			-1.35	5.7	0.00949	1.06	6.91	0.30949	-0.48	6.5	0.19007	1.42	4.88	0.01333	0.5	5.92	0.14178	0.3	7.6	0.27579	0.08	7.49	0.84212	0.22	7.57	0.72112	-0.04	6.72	0.94156	0.36	6.93	0.37581	-0.87	6.31	0.13212	-1.86	5.63	0.00194	-0.18	6.46	1	0.16
	THC0290_0472	568692	569156	1	CDS		Protein of unknown function	THC0290_v2_0491		-1.57	12.21	0.00873	-0.99	12.5	0.0141	-0.48	12.87	0.06791	1.18	12	0.00646	0.08	12.42	0.75097	-0.07	12.68	0.84953	-0.8	12.32	0.07247	-1.32	12.06	0.05959	-0.14	13.04	0.63244	-0.19	13.02	0.49801	-0.44	12.89	0.10745	-0.67	12.34	0.0121	0.12	12.73	1	0.02
nusA	THC0290_0473	569172	570413	1	CDS		Transcription elongation protein NusA	THC0290_v2_0492	nusA	-1.52	12.79	0.00438	-1.22	12.94	0.00506	-0.48	13.33	0.02974	0.65	12.57	0.00681	0.15	12.93	0.40414	-0.21	12.98	0.45153	-0.94	12.62	0.04138	-1.86	12.16	0.03602	0.22	13.68	0.3661	0.18	13.66	0.43141	-0.31	13.41	0.11312	-1.02	12.85	0.00356	0.01	13.36	1	0.01
	THC0290_N_0344	570414	570466	1	Region	intra	new TR			-1.59	13.75	0.00571	-0.86	14.11	0.07066	-0.48	14.31	0.02566	0.33	13.49	0.0434	0.15	13.98	0.6609	-0.13	13.8	0.57608	-0.93	13.39	0.03787	-1.86	12.93	0.07455	0.31	14.7	0.21683	0.28	14.69	0.22486	-0.11	14.49	0.47204	-1.2	13.85	0.00617	-0.04	14.43	1	0.19
infB	THC0290_0474	570467	573370	1	CDS		Translation initiation factor IF-2	THC0290_v2_0493	infB	-1.47	12.69	0.00368	-1.18	12.83	0.00472	-0.57	13.19	0.02071	0.78	13.09	0.00542	0.19	12.89	0.36144	-0.33	12.52	0.21451	-0.74	12.31	0.04387	-1.83	11.77	0.03738	0.34	13.65	0.26733	0.34	13.65	0.17412	-0.26	13.35	0.20085	-0.45	13.07	0.0255	0.01	13.3	1	0.1
	THC0290_N_0346	573619	573816	-1	Region	repeated_region	new TR			1.2	8.13	0.11171	2.6	8.83	0.00352	0.03	7.79	0.91205	2.66	9.56	0.00158	0.15	7.89	0.59054	0.59	9.85	0.35924	0.54	9.83	0.32477	1.2	10.16	0.1657	-0.9	7.33	0.07026	-0.54	7.51	0.16744	0.91	8.23	0.0309	-0.26	7.95	0.2325	0.01	8.08	1	0.05
16s rRNA	THC0290_rRNA_0001	574936	576435	1	rRNA		16s ribosomal RNA			0	17.1	1	0	17.1	1	0	17.1	1	0	17.1	1	0	17.1	1	0	17.1	1	0	17.1	1	0	17.1	1	0	17.1	1	0	17.1	1	0	17.1	1	0	17.1	1	0	17.1	1	0
	THC0290_tRNA_0010	576546	576622	1	tRNA		transfer RNA-Ile			-0.56	14.95	0.07562	-0.08	15.19	0.68025	-0.54	15.37	0.02567	0.29	13.85	0.06949	0.06	14.81	0.88876	0.87	14.35	0.34977	0.96	14.39	0.21591	1.72	14.77	0.08079	-0.46	15.41	0.11988	-0.55	15.37	0.0803	-0.45	15.41	0.07621	-0.25	14.91	0.28476	0.12	15.1	1	-0.21
	THC0290_tRNA_0011	576781	576857	1	tRNA		transfer RNA-Ala			-0.46	15.28	0.05911	-0.31	15.35	0.09911	-0.27	15.69	0.45847	0.6	13.91	0.05358	0.17	15.11	0.81106	1.11	14.5	0.14661	1.5	14.7	0.02861	1.88	14.89	0.05365	-0.62	15.51	0.23012	-0.64	15.5	0.1963	-0.55	15.54	0.1908	-0.11	15.41	0.45005	-0.19	15.37	1	0.12
23s rRNA	THC0290_rRNA_0002	577071	579955	1	rRNA		23s ribosomal RNA			0	17.1	1	0	17.1	1	0	17.1	1	0	17.1	1	0	17.1	1	0	17.1	1	0	17.1	1	0	17.1	1	0	17.1	1	0	17.1	1	0	17.1	1	0	17.1	1	0	17.1	1	0
	THC0290_N_0347	579956	580112	1	Region	intra	new TR			-1.24	14.31	0.00339	-0.72	14.57	0.01408	-0.23	14.89	0.17351	0.16	13.79	0.29326	-0.01	14.36	0.98627	0.05	13.81	0.85901	-0.74	13.42	0.0659	-0.68	13.45	0.10893	-0.07	14.97	0.7814	-0.14	14.93	0.53579	0.28	15.14	0.32907	-0.38	14.74	0.0977	-0.09	14.89	1	0.01
5s rRNA	THC0290_rRNA_0003	580113	580218	1	rRNA		5s ribosomal RNA			1.07	15.78	0.05612	1.76	16.12	0.00143	0.15	15.85	0.66798	-0.69	15.75	0.04351	0.11	16.05	0.83264	0.91	16.65	0.08385	0.91	16.65	0.04118	0.91	16.65	0.06571	-0.52	15.51	0.26895	-0.5	15.52	0.29525	0.16	15.85	0.74587	-0.47	16.07	0.15504	-0.23	16.19	1	-0.52
	THC0290_0475	580335	580526	-1	gene		Transposase (fragment)	THC0290_v2_0497		1.48	8.1	0.00541	2.55	8.64	0.00095	0.28	7.6	0.29265	0.77	9.04	0.00633	0.13	7.93	0.45391	0.71	10.38	0.09578	0.71	10.38	0.09054	1.43	10.74	0.0738	-0.42	7.24	0.25996	0	7.46	0.99931	0.65	7.78	0.10494	0.72	7.96	0.00659	-0.01	7.6	1	0.07
	THC0290_N_0348	580527	580629	-1	Region	5prime	new TR			2.21	8.68	0.02188	3.2	9.18	0.00381	-0.08	7.84	0.55975	0.96	9.64	0.00283	0.13	8.26	0.48459	1.65	11.1	0.08318	1.49	11.02	0.08346	0.76	10.65	0.28736	-0.08	7.84	0.82045	0.25	8	0.43768	0.39	8.07	0.12921	0.82	8.31	0.01408	0.31	8.06	1	-0.34
	THC0290_0476	580874	581557	-1	gene		Fragment of transposase (fragment) (part 1)	THC0290_v2_0499		0.49	5.3	0.1638	1.4	5.75	0.00254	-0.31	4.98	0.38928	0.26	5.51	0.05893	0.15	5.22	0.69465	0.96	6.5	0.41388	1.72	6.88	0.08092	1.49	6.77	0.2103	-0.88	4.7	0.0684	-0.84	4.72	0.08508	0.27	5.28	0.17306	-0.26	4.85	0.14265	0.01	4.99	1	0.1
	THC0290_0477	581578	581844	-1	gene		Truncated transposase IS256 family, N-terminal region	THC0290_v2_0500		0.7	6.08	0.10202	1.34	6.39	0.02821	0.11	5.55	0.41893	0.28	6.48	0.64121	0.11	5.9	0.5808	2.58	8.1	0.08303	3.34	8.48	0.03752	3.32	8.47	0.03738	-0.16	5.42	0.75953	-0.52	5.24	0.1005	0.57	5.79	0.05323	-0.57	5.54	0.0131	0.02	5.83	1	0.29
	THC0290_0478	582060	583262	1	CDS		Transposase IS256 family	THC0290_v2_0501		-1.04	11	0.00497	-1.33	10.85	0.00189	-0.78	11.23	0.01243	0.45	11.04	0.13671	0.33	11.35	0.19665	0.24	10.33	0.3525	0.28	10.35	0.21331	1.08	10.75	0.06484	-0.28	11.48	0.25858	-0.21	11.52	0.36039	0.14	11.69	0.48279	-0.69	10.99	0.00678	0.01	11.34	1	-0.27
	THC0290_0479	583285	583464	-1	gene		Truncated transposase IS3 family, central region	THC0290_v2_0502		0.79	10.97	0.12447	1.28	11.21	0.03567	0.19	10.92	0.3229	2.53	12.42	0.00055	0.21	10.77	0.39701	0.8	12.45	0.24801	0.03	12.06	0.97032	-0.1	11.99	0.90721	-0.03	10.8	0.91012	0.06	10.85	0.86423	0.4	11.02	0.1358	0.78	11.16	0.0052	0.03	10.78	1	-0.28
	THC0290_N_0350	583465	583562	-1	Region	repeated_region	new TR			0.63	12.47	0.02567	0.93	12.62	0.00827	0.38	12.47	0.07107	1.73	12.57	0.00167	-0.01	12.43	0.95988	0.65	14.33	0.5991	-0.68	13.66	0.26039	-0.44	13.78	0.48969	-0.23	12.16	0.36216	-0.1	12.23	0.70665	0.55	12.56	0.04428	0.74	12.62	0.00611	-0.02	12.24	1	-0.07
	THC0290_0480	583563	584543	-1	CDS		Probable modification methyltransferase	THC0290_v2_0503		0.23	11.77	0.18443	0.34	11.82	0.11665	0.29	11.71	0.13026	1.97	12.03	0.00059	0.33	11.66	0.22471	0.19	12.34	0.39826	-0.47	12.01	0.08417	-1.01	11.73	0.0531	-0.08	11.52	0.75127	0	11.57	0.99208	0.45	11.79	0.11697	0.69	11.86	0.01256	-0.03	11.5	1	0.02
	THC0290_0481	584540	585397	-1	CDS		Probable type II restriction endonuclease	THC0290_v2_0504		0.37	11.87	0.05395	0.64	12.01	0.09691	0.31	11.91	0.25912	1.35	12.01	0.00196	0.29	11.88	0.20489	0.21	12.82	0.43933	0.09	12.76	0.72874	0.25	12.84	0.49755	-0.2	11.66	0.56222	-0.15	11.68	0.6503	0.3	11.91	0.32954	0.8	12	0.0075	0.1	11.65	1	-0.11
	THC0290_N_0351	585398	586012	-1	Region	repeated_region	new TR			0.82	8.66	0.02012	2.13	9.31	0.00117	-0.61	8.09	0.0204	1.99	9.96	0.00072	0.4	8.58	0.17042	0.7	10.81	0.10327	0.22	10.57	0.40641	0.74	10.83	0.11085	-0.33	8.22	0.20622	-0.42	8.18	0.16623	0.56	8.67	0.04021	0.33	8.53	0.05607	0.1	8.42	1	0.03
	THC0290_0482	586087	587670	1	CDS		Transposase IS1182 family	THC0290_v2_0505		0.94	7.82	0.00626	3.13	8.92	0.00078	0.52	7.53	0.02863	4.14	9.84	0.00053	0.16	7.45	0.37381	1.69	11.71	0.08318	1.6	11.67	0.04118	1.43	11.58	0.12402	0.27	7.41	0.47515	-0.05	7.25	0.8531	0.94	7.74	0.01623	1.53	8.39	0.00245	0.15	7.7	1	-0.02
	THC0290_0483	587775	588839	-1	CDS		Hypothetical transmembrane protein	THC0290_v2_0506		0.73	8.68	0.0079	1.99	9.31	0.00289	-0.12	8.46	0.56463	0.61	9.32	0.0199	0.22	8.69	0.32983	0.45	11.45	0.18423	-0.34	11.05	0.12924	-0.41	11.02	0.43241	-0.2	8.42	0.58657	-0.21	8.41	0.45842	0.27	8.65	0.37053	0.4	8.58	0.02513	0.15	8.45	1	0.07
	THC0290_N_0352	588840	589163	-1	Region	repeated_region	new TR			0.18	9.89	0.54044	1.48	10.54	0.00747	0.25	9.97	0.12504	0.21	10.4	0.08052	0.13	10.3	0.56878	0.59	11.42	0.10868	0.18	11.22	0.3653	1.2	11.73	0.0463	0.08	9.88	0.86507	-0.07	9.81	0.76743	0.43	10.06	0.05707	0.37	10.2	0.12686	0.13	10.08	1	0.19
	THC0290_0484	589164	589526	-1	CDS		Protein of unknown function	THC0290_v2_0507		0.65	10.94	0.06951	2.07	11.64	0.00288	-0.16	10.48	0.38308	-0.35	10.79	0.0607	0.07	10.83	0.71923	0.98	13.04	0.13027	1.09	13.1	0.07077	1.42	13.27	0.0536	0.27	10.69	0.51572	0.1	10.61	0.80768	0.01	10.56	0.97744	0.37	10.85	0.03886	0.07	10.7	1	-0.14
	THC0290_N_0353	589527	589618	-1	Region	5prime	new TR			0.19	11.45	0.37778	1.77	12.24	0.00176	-0.6	11.1	0.01844	-0.54	11.63	0.01325	0.21	11.35	0.41865	1.07	13.47	0.08385	1.6	13.74	0.03009	1.54	13.71	0.0511	0.31	11.56	0.29306	0.19	11.5	0.44065	-0.48	11.16	0.05242	-0.01	11.6	0.97049	0.07	11.64	1	-0.02
	THC0290_N_0354	589619	589720	-1	Region	5prime	new TR			-0.24	8.18	0.24615	1.42	9.01	0.00367	-0.47	8.07	0.25959	1.69	8.63	0.00934	0.29	8.1	0.26586	0.96	10.19	0.29854	1.95	10.68	0.12266	2.62	11.02	0.07821	0.04	8.32	0.94429	0.36	8.49	0.54245	-0.05	8.28	0.9332	0.48	8.21	0.04468	0.18	8.06	1	0.13
	THC0290_0485	589753	591324	1	CDS		Transposase IS1182 family	THC0290_v2_0508		0.85	8.11	0.00565	2.96	9.17	0.00085	0.15	7.87	0.40586	3.68	10.47	0.00066	0.25	7.94	0.28553	1.45	11.69	0.08809	1.14	11.53	0.06657	0.78	11.35	0.44604	-0.13	7.74	0.67779	-0.12	7.74	0.71468	0.9	8.25	0.01945	1.28	8.47	0.00364	0.05	7.85	1	0.02
	THC0290_0486	591334	592536	-1	CDS		Transposase IS256 family	THC0290_v2_0509		-1.13	10.99	0.00396	-1.39	10.85	0.00172	-0.71	11.28	0.0122	0.55	10.97	0.10445	0.33	11.38	0.30566	0.19	10.36	0.39826	0.13	10.33	0.46717	0.92	10.72	0.15373	-0.24	11.52	0.3222	-0.29	11.49	0.19296	0.1	11.69	0.52294	-0.61	11.04	0.00789	0.04	11.36	1	-0.14
	THC0290_0487	592935	594287	1	CDS		Protein of unknown function	THC0290_v2_0510		-1.39	11.53	0.00541	-1.47	11.49	0.0016	-0.17	12.12	0.48053	-1.45	9.47	0.00715	0.06	12.13	0.80315	-0.08	10.86	0.86762	-0.57	10.61	0.12907	-0.23	10.78	0.52026	-0.38	12.01	0.26699	-0.36	12.02	0.35777	-1.14	11.63	0.03174	0.22	11.95	0.19921	0.01	11.85	1	0.11
	THC0290_0488	594274	594957	1	CDS		Protein of unknown function	THC0290_v2_0511		-1.19	10.62	0.00737	-0.99	10.71	0.01039	-0.19	11.18	0.47895	0.37	9.89	0.26362	0.07	11.25	0.76213	-0.04	10.28	0.89945	-0.43	10.08	0.12632	-0.57	10.01	0.1932	-0.28	11.13	0.43415	-0.11	11.22	0.80703	-1.06	10.74	0.04967	0.21	11.1	0.10492	-0.03	10.98	1	0.37
	THC0290_N_0355	594958	595161	1	Region	intra	new TR			-1.04	9.65	0.0234	-0.56	9.89	0.03023	-0.58	9.75	0.01933	0.66	9.29	0.01122	0.09	9.81	0.65331	0.28	9.77	0.24814	-0.82	9.22	0.1891	0.69	9.98	0.08809	-0.07	10	0.80714	-0.14	9.97	0.60981	0.17	10.12	0.33072	0.09	9.61	0.47769	0.18	9.66	1	-0.09
	THC0290_0489	595162	596364	1	CDS		Transposase IS256 family	THC0290_v2_0512		-1.07	10.94	0.00412	-1.34	10.81	0.00173	-0.71	11.25	0.01287	0.35	11.01	0.23776	0.23	11.35	0.3517	0.19	10.28	0.50857	0.25	10.31	0.3653	1.06	10.72	0.15205	-0.3	11.46	0.23198	-0.25	11.48	0.26433	0.01	11.61	0.95118	-0.66	11.03	0.00689	-0.07	11.32	1	-0.1
	THC0290_N_0356	596351	596476	-1	Region	3prime	new TR			0.97	9.33	0.03333	1.14	9.42	0.11214	0.24	9.18	0.17873	-2.38	10.03	0.00298	-0.25	9.58	0.40606	-1.46	8.97	0.49925	-0.85	9.28	0.17228	-0.82	9.29	0.65889	-0.43	8.85	0.14275	-0.38	8.87	0.14089	-0.12	9	0.48214	0.21	9.35	0.12017	0.06	9.27	1	-0.04
	THC0290_0490	596477	596959	-1	CDS		Hypothetical lipoprotein precursor	THC0290_v2_0513		0.73	11.5	0.03027	0.16	11.21	0.56575	0.68	11.32	0.01386	-1.3	11.84	0.0079	0.03	11.8	0.92062	-0.87	11.08	0.14114	-1.03	11	0.05839	-0.76	11.13	0.16976	-0.67	10.64	0.14275	-0.52	10.72	0.25396	-0.09	10.93	0.68527	-0.18	11.33	0.19146	0	11.42	1	0.34
fcpB	THC0290_0491	596971	598155	-1	CDS		Streptopain family cystein protease precursor	THC0290_v2_0514	fcpB	0.81	12.17	0.01138	0.48	12.01	0.03766	0.59	11.83	0.01765	-1.55	12.48	0.00067	-0.1	12.29	0.66871	-0.45	11.62	0.1459	-0.59	11.55	0.06307	-0.4	11.65	0.25804	-0.5	11.29	0.14347	-0.46	11.31	0.20249	0.05	11.56	0.76702	-0.15	11.9	0.29603	-0.08	11.93	1	0.09
	THC0290_N_0357	598156	598542	-1	Region	intra	new TR			0.86	10.35	0.006	1.5	10.67	0.00151	0.64	10.28	0.01477	-0.56	11.27	0.02376	0.05	10.34	0.80194	-0.1	11.22	0.68603	-0.57	10.99	0.07055	-0.43	11.06	0.28224	-0.17	9.88	0.47492	-0.35	9.79	0.24565	0.22	10.07	0.19732	0.91	10.5	0.00462	-0.01	10.04	1	0.02
	THC0290_0492	598543	599625	-1	CDS		Probable transmembrane protein of unknown function	THC0290_v2_0515		0.34	10.26	0.1501	0.47	10.33	0.0232	-0.16	10.05	0.36035	-0.24	10.28	0.31046	0.23	10.27	0.36803	0.21	10.45	0.37945	-0.05	10.32	0.83428	0.05	10.37	0.88625	-0.16	10.05	0.67779	-0.34	9.96	0.19013	0.24	10.25	0.31056	0.05	10.08	0.7233	0.12	10.12	1	0.08
	THC0290_N_0358	599626	599900	-1	Region	5prime	new TR			1.29	9.81	0.15797	2.1	10.21	0.00623	-0.33	9.23	0.08752	-0.45	9.31	0.26715	0.37	9.53	0.16404	1.29	10.62	0.1322	1.35	10.65	0.10822	1.63	10.8	0.11552	-0.35	9.22	0.20622	-0.38	9.21	0.15269	0	9.4	0.99601	-0.02	9.56	0.92059	-0.02	9.56	1	-0.43
	THC0290_0493	599929	600711	-1	CDS		Transposase IS3 family	THC0290_v2_0516		-0.2	7.59	0.29785	0.78	8.08	0.00558	-0.03	7.46	0.84621	-0.87	7.05	0.01826	-0.07	7.32	0.79788	0.9	9.24	0.11057	0.67	9.13	0.11687	0.42	9	0.38871	-0.26	7.35	0.33337	-0.4	7.27	0.15131	-0.71	7.12	0.06699	0.26	7.54	0.07133	0.05	7.44	1	-0.04
	THC0290_N_0359	600712	600785	-1	Region	repeated_region	new TR			0.13	7.67	0.49977	1.3	8.25	0.00295	-0.12	7.44	0.40984	-1.53	6.82	0.0009	-0.34	7.36	0.16355	0.97	8.91	0.08303	-0.15	8.34	0.63683	-2.6	7.12	0.19295	-0.2	7.4	0.57598	-0.54	7.23	0.07638	-1.09	6.96	0.01376	0.27	7.52	0.08195	0.11	7.44	1	0.18
	THC0290_0494	600786	601169	-1	CDS		Hypothetical protein	THC0290_v2_0517		-0.08	7.22	0.68613	1.79	8.15	0.00159	-0.12	7.24	0.55051	0.87	7.92	0.00197	0.12	6.97	0.66421	1.84	9.99	0.10673	1.63	9.89	0.09097	0.99	9.56	0.22831	-0.2	7.2	0.50752	-0.38	7.11	0.1356	-0.93	6.83	0.01287	0.12	7.32	0.62545	-0.21	7.16	1	0.09
	THC0290_0495	601377	601946	-1	CDS		Hypothetical protein	THC0290_v2_0518		0.17	4.35	0.46407	0.09	4.31	0.67226	0.19	4.6	0.70808	2.83	5.82	0.03381	-0.29	4.21	0.37957	1.1	5.58	0.33712	2.4	6.23	0.1054	3.38	6.72	0.07751	-0.11	4.45	0.86669	-0.26	4.38	0.6622	-0.13	4.44	0.81704	0.48	4.37	0.05292	0.23	4.25	1	-0.3
	THC0290_0496	601969	602310	1	gene		Truncated transposase IS1182 family	THC0290_v2_0519		0.96	7.81	0.02887	2.49	8.57	0.00103	0.04	7.58	0.84754	3.63	10.06	0.00062	0.26	7.74	0.30142	1.44	10.48	0.08417	1.01	10.27	0.07084	1.66	10.59	0.08434	-0.19	7.47	0.48935	-0.08	7.52	0.80522	0.32	7.72	0.17332	0.86	7.96	0.02654	0.12	7.58	1	-0.14
	THC0290_0497	602402	603604	1	CDS		Transposase IS256 family	THC0290_v2_0520		-0.98	11.03	0.00541	-1.4	10.82	0.00213	-0.72	11.24	0.01439	0.35	11.04	0.20657	0.24	11.36	0.25615	0.4	10.35	0.22916	0.39	10.35	0.16842	1.29	10.8	0.1537	-0.24	11.48	0.32947	-0.28	11.46	0.21699	0.12	11.66	0.45314	-0.48	10.93	0.0217	0.15	11.25	1	-0.09
	THC0290_0498	603925	604707	-1	CDS		Hypothetical lipoprotein precursor	THC0290_v2_0522		1.13	8.11	0.01474	1.05	8.06	0.03146	0.89	7.68	0.02597	0.68	8.85	0.01641	0.26	8.23	0.31053	-1.2	8.65	0.08318	-0.71	8.89	0.20582	-0.39	9.05	0.70646	-0.76	6.86	0.08467	-0.63	6.92	0.1182	0.65	7.57	0.06041	0.49	8.06	0.11257	0.03	7.83	1	0.2
	THC0290_N_0360	604737	605191	-1	Region	3prime-PT	new TR			1.12	9.19	0.00482	1.09	9.17	0.00575	0.45	8.58	0.3395	0.56	10.39	0.0271	0.14	9.33	0.48926	-0.99	9.22	0.08385	-0.98	9.23	0.08184	-1.05	9.19	0.16299	-0.85	7.93	0.17784	-0.84	7.93	0.16194	0.64	8.67	0.26662	0.48	9.24	0.05511	-0.09	8.96	1	0.24
	THC0290_0499	604918	605220	1	CDS		Hypothetical protein	NA		0.06	4.27	0.86517	0.99	4.73	0.10221	-0.14	4.16	0.54364	2.17	5.4	0.19462	0.04	4.13	0.87858	0.26	5.21	0.88774	-1	4.58	0.04138	2.78	6.47	0.21915	0.14	4.29	0.71652	-0.09	4.18	0.78173	-0.13	4.16	0.5979	-0.28	4.23	0.29516	0.2	4.47	1	-0.55
	THC0290_0500	605227	607704	-1	CDS		Probable S8 and S53 subtilisin family serine endopeptidase precursor	THC0290_v2_0523		0.89	10.39	0.02755	1.42	10.65	0.00319	0.45	9.9	0.08501	0.04	11.15	0.68584	0.37	10.96	0.21843	-0.35	10.91	0.18869	-0.62	10.77	0.05839	-0.52	10.82	0.19093	-0.9	9.23	0.08109	-1.01	9.18	0.04197	0.96	10.16	0.02289	0.15	10.3	0.33244	-0.02	10.21	1	0.21
	THC0290_0501	607701	608105	-1	CDS		Hypothetical lipoprotein precursor	THC0290_v2_0524		1.33	10.26	0.00438	1.84	10.52	0.00224	0.52	9.65	0.03038	-0.01	10.68	0.9457	0.36	10.66	0.17684	0.2	11.11	0.3581	0.43	11.23	0.13619	0.7	11.36	0.14411	-0.8	8.98	0.10341	-1.03	8.87	0.0374	0.86	9.82	0.01407	-0.01	9.88	0.94112	-0.04	9.87	1	0
	THC0290_N_0362	608106	608358	-1	Region	5prime	new TR			0.29	7.99	0.15045	1.79	8.74	0.00133	0.21	7.72	0.18384	-0.64	8.29	0.1688	0.21	8.31	0.32698	0.35	9.86	0.22129	1.06	10.22	0.03249	1.42	10.4	0.05781	-0.22	7.5	0.50627	-0.58	7.32	0.09064	0.23	7.73	0.19408	0.71	8.22	0.02973	0.24	7.98	1	-0.02
	THC0290_0502	608390	609994	1	CDS		Transposase IS1182 family	THC0290_v2_0525		1.11	7.68	0.00434	3.42	8.83	0.00078	0.38	7.41	0.09858	4.02	10.09	0.00062	0.17	7.31	0.36584	1.41	11.55	0.09046	1.17	11.43	0.06922	0.67	11.18	0.44313	0.1	7.27	0.72416	0.04	7.24	0.89424	1.07	7.75	0.01404	1.59	8.21	0.00467	0.04	7.43	1	0
	THC0290_N_0363	609996	610101	-1	Region	repeated_region	new TR			1.36	10.62	0.01463	3.07	11.47	0.00122	0.41	10.23	0.03713	1.85	12.03	0.00091	0.27	10.33	0.2155	0.79	13.03	0.09046	0.13	12.7	0.65328	-0.4	12.43	0.32678	-0.57	9.75	0.08211	-0.68	9.69	0.04653	1.03	10.55	0.01173	1.01	10.5	0.00645	0.17	10.09	1	-0.11
	THC0290_0503	610102	610602	-1	CDS		Protein of unknown function precursor	THC0290_v2_0526		1.59	9.65	0.00804	3.3	10.51	0.00085	0.48	9.09	0.11324	1.83	10.86	0.00078	0.37	9.54	0.15729	0.87	12.78	0.09046	0.4	12.54	0.19611	0.3	12.5	0.37288	-0.88	8.41	0.09261	-1.01	8.34	0.07312	1.3	9.5	0.02202	1.32	9.76	0.00397	0.12	9.17	1	-0.18
	THC0290_N_0364	610603	610665	-1	Region	5prime	new TR			2.22	10.47	0.04338	3.74	11.23	0.00978	0.59	9.74	0.14952	1.66	11.32	0.00582	0.46	10.2	0.25994	1.68	13.54	0.20107	1.25	13.33	0.34355	1.55	13.48	0.27807	-1.04	8.92	0.11023	-1.03	8.93	0.07102	1.3	10.09	0.04256	1.02	10.34	0.00452	0.37	10.01	1	-0.9
	THC0290_0504	611442	612659	1	CDS		Probable transposase	THC0290_v2_0527		1.21	8.58	0.00339	2.96	9.45	0.00082	0.44	8.03	0.12848	1.27	9.97	0.00092	-0.09	8.22	0.68867	0.71	11.3	0.19224	0.33	11.11	0.45201	-0.07	10.9	0.89454	-0.09	7.76	0.81502	-0.11	7.75	0.74626	0.48	8.05	0.11413	1.15	8.79	0.00289	0.08	8.25	1	0.07
	THC0290_N_0365	612761	612929	1	Region	5prime	new TR			2.16	9.7	0.01519	2.43	9.84	0.00161	0.42	9	0.05086	-0.7	10.22	0.02051	0.31	9.56	0.16735	0.99	10.75	0.08417	1.94	11.22	0.03606	2.18	11.34	0.03772	-0.72	8.43	0.08916	-0.78	8.4	0.04397	-0.35	8.62	0.09899	0.65	9.41	0.09858	0.2	9.18	1	0.03
	THC0290_0505	612930	613817	1	CDS		Protein of unknown function	THC0290_v2_0529		1.2	8.01	0.00424	0.95	7.89	0.00436	-0.04	7.38	0.79984	-0.21	8.5	0.37822	0.17	7.97	0.5365	1.13	9.07	0.08318	0.55	8.78	0.12804	-0.81	8.1	0.16181	-0.47	7.17	0.13747	-0.78	7.01	0.04707	-0.11	7.35	0.57213	0.32	7.65	0.08733	0	7.49	1	0.19
	THC0290_N_0366	613818	613961	1	Region	intra	new TR			2.22	7.06	0.03143	2.23	7.06	0.0061	-0.47	6.11	0.03413	1.23	6.99	0.00447	0.23	6.4	0.37307	1.73	7.36	0.14237	-0.54	6.23	0.82241	-0.25	6.37	0.77486	-1.34	5.68	0.0316	-1.33	5.69	0.04615	-0.34	6.18	0.2653	0.09	6.12	0.69052	-0.15	6	1	-0.3
	THC0290_0506	613962	614243	1	CDS		Protein of unknown function	THC0290_v2_0530		2.13	5.98	0.02808	3.61	6.71	0.00196	-0.7	4.96	0.07811	0.01	7.3	0.96688	0.1	5.06	0.63365	2.45	5.8	0.087	2.99	6.07	0.03658	0.64	4.89	0.25606	-0.45	5.08	0.46882	-0.39	5.12	0.48736	0.44	5.53	0.06457	-0.04	5	0.86031	-0.7	4.67	1	0.2
	THC0290_0507	614341	614829	1	gene		Truncated protein of unknown function, N-terminal region	THC0290_v2_0531		1.47	4.85	0.01432	1.3	4.77	0.18842	0.1	4.05	0.5885	0.56	5.91	0.24229	-0.13	4.03	0.48883	-0.06	3.93	0.80517	0.35	4.13	0.39537	1.61	4.76	0.41706	0.29	4.14	0.51698	0.25	4.12	0.26767	0.81	4.4	0.01779	-0.07	4.07	0.68239	0.12	4.17	1	-0.14
	THC0290_N_0367	614486	614829	-1	Region	repeated_region	new TR			1.55	4.85	0.00409	4.5	6.33	0.00088	0.25	4.23	0.26352	3.57	6.5	0.00216	0.3	4.23	0.30063	1.22	10.68	0.08948	0.77	10.46	0.11462	0.86	10.5	0.15415	-0.13	4.04	0.61763	0.15	4.18	0.71752	0.33	4.27	0.15157	0.43	4.38	0.23925	0.45	4.39	1	-0.04
	THC0290_0508	614830	615714	-1	CDS		Transposase IS982 family	THC0290_v2_0532		-0.1	11.33	0.52415	0.37	11.57	0.06379	0.08	11.32	0.58652	1.29	11.79	0.00089	0.1	11.55	0.68867	0.92	13.43	0.13603	1.07	13.5	0.03674	1.34	13.63	0.07049	-0.1	11.23	0.68549	-0.24	11.16	0.30652	0.97	11.77	0.01254	-0.05	11.12	0.64132	0.07	11.18	1	-0.01
	THC0290_N_0368	615707	616002	1	Region	repeated_region	new TR			0.69	8.64	0.0899	1	8.8	0.01928	-0.51	8.33	0.05543	1.41	9.1	0.00181	0.22	8.56	0.36672	1.35	10.53	0.08417	1.84	10.78	0.04015	1.78	10.75	0.03973	-0.38	8.4	0.20622	-0.29	8.44	0.34126	0.08	8.63	0.74074	-0.08	8.71	0.75252	-0.3	8.6	1	-0.4
	THC0290_0509	616003	617439	1	gene		Truncated protein of unknown function, C-terminal region	THC0290_v2_0533		-0.1	5.94	0.57082	0.14	6.06	0.41709	-0.57	5.88	0.07669	3.11	7.28	0.00053	0.22	5.75	0.32259	0.88	7.85	0.09046	1.34	8.09	0.04138	-0.84	7	0.74582	-0.13	6.1	0.82339	0.17	6.25	0.63166	-0.03	6.15	0.91617	0.45	5.95	0.15761	-0.23	5.61	1	0.08
	THC0290_N_0369	617835	617953	1	Region	5prime	new TR			-0.29	6.5	0.24939	0.66	6.97	0.03574	-0.67	6.73	0.02569	-0.5	6.4	0.21726	0.56	6.68	0.30097	0.3	8.56	0.61339	0.45	8.64	0.23976	-0.28	8.27	0.84562	0.05	7.09	0.9129	0.17	7.15	0.70391	-0.56	6.78	0.09944	0.22	6.59	0.58974	-0.07	6.45	1	-0.14
	THC0290_0510	617954	620056	1	CDS		Probable modification methyltransferase	THC0290_v2_0534		-0.39	10.3	0.04916	0.29	10.64	0.14955	-0.49	10.15	0.14365	0.59	10.4	0.00805	0.46	10.31	0.10183	-0.16	10.79	0.48661	-0.6	10.57	0.06875	-1.22	10.26	0.1573	0.67	10.73	0.14833	0.61	10.7	0.13849	-0.09	10.35	0.80084	0.07	10.21	0.62996	-0.05	10.15	1	0.15
	THC0290_0511	620053	621324	1	CDS		Probable modification methyltransferase	THC0290_v2_0535		-0.82	9.66	0.02432	-0.74	9.7	0.01225	-0.5	9.76	0.03462	1.07	9.41	0.00198	0.43	9.55	0.14177	-0.44	9.29	0.23699	-0.95	9.03	0.04118	-2.71	8.15	0.02794	0.44	10.23	0.12936	0.55	10.28	0.06984	-0.23	9.89	0.18158	0.21	9.58	0.09624	0.01	9.48	1	0.34
	THC0290_0512	621348	626210	1	CDS		Protein of unknown function	THC0290_v2_0536		-0.47	8.92	0.02215	-0.98	8.66	0.00562	-0.39	8.95	0.04135	0.84	7.9	0.00483	0.4	8.79	0.21668	-0.54	7.99	0.36344	-0.4	8.07	0.62629	1.09	8.81	0.23895	0.25	9.27	0.2968	0.53	9.41	0.07312	-0.07	9.11	0.68175	0.82	9.03	0.00929	0.04	8.64	1	0.37
	THC0290_0513	626217	629510	1	CDS		Probable type I restriction endonuclease	THC0290_v2_0537		0.1	9.24	0.50612	-0.68	8.85	0.03412	0.13	9.24	0.53247	1.97	7.79	0.00159	0.29	9.08	0.2665	-0.97	7.76	0.14599	0.17	8.32	0.599	-0.11	8.18	0.96738	0.21	9.28	0.49188	0.38	9.37	0.20619	0.11	9.23	0.62954	0.76	9.27	0.00652	-0.07	8.86	1	0.15
	THC0290_0514	629601	630056	1	CDS		Protein of unknown function	THC0290_v2_0538		0.01	8.56	0.9493	-0.4	8.35	0.03618	0.15	8.53	0.29415	2.88	7.38	0.00055	0.21	8.26	0.40252	-0.81	6.98	0.17789	-1.96	6.41	0.07945	-0.79	6.99	0.79305	0.32	8.62	0.24415	0.48	8.7	0.11507	0.09	8.51	0.58217	0.95	8.71	0.00659	-0.08	8.19	1	0.04
	THC0290_N_0370	630057	630234	1	Region	intra	new TR			0.14	9.48	0.40905	-0.9	8.96	0.00855	0.3	9.12	0.07472	1.14	8.39	0.07038	0.26	9.12	0.36476	-0.8	8.1	0.45568	0.37	8.69	0.40509	0.99	9	0.52533	0.49	9.22	0.10931	0.69	9.32	0.08314	0.37	9.16	0.08858	0.47	9.24	0.01545	-0.03	8.99	1	-0.01
	THC0290_0515	630235	632664	1	CDS		Protein of unknown function	THC0290_v2_0540		0.27	9.35	0.15197	-1.12	8.66	0.02233	0.47	9.3	0.04899	1.36	8.55	0.0014	0.21	9.25	0.38881	-1.38	7.54	0.14547	0.15	8.3	0.79968	0.36	8.4	0.56963	0.43	9.28	0.14768	0.67	9.4	0.07477	0.41	9.27	0.1405	0.45	9.27	0.06515	0.11	9.1	1	0.13
	THC0290_N_0371	632665	632796	1	Region	repeated_region	new TR			-0.15	9.42	0.69671	0.32	9.66	0.28299	-0.64	9.29	0.01477	0.64	9.04	0.02454	0.3	9.33	0.31079	1.05	10.16	0.19127	0.34	9.8	0.37048	1.37	10.32	0.07242	0.07	9.65	0.75926	0.16	9.69	0.44793	0.44	9.83	0.0775	-0.02	9.21	0.85957	0.1	9.27	1	-0.27
	THC0290_0516	632797	633999	1	CDS		Transposase IS256 family	THC0290_v2_0541		-0.99	10.94	0.0065	-1.38	10.75	0.00171	-0.69	11.22	0.01268	0.49	10.92	0.10951	0.32	11.28	0.26385	0.33	10.31	0.21815	0.24	10.27	0.28514	1.05	10.67	0.19669	-0.31	11.41	0.21646	-0.29	11.42	0.20919	0.17	11.65	0.34004	-0.59	10.95	0.00817	0.09	11.29	1	-0.16
	THC0290_N_0372	633986	634186	-1	Region	repeated_region	new TR			0.87	7.95	0.00921	3.71	9.37	0.00078	0	7.66	0.99498	2.91	10.05	0.00053	0.05	7.69	0.78702	0.86	11.21	0.1106	0.34	10.95	0.14319	0.77	11.16	0.10009	-0.22	7.55	0.46799	-0.05	7.64	0.89059	0.46	7.89	0.13497	-0.11	7.81	0.48244	-0.13	7.8	1	0.01
	THC0290_0517	634225	634386	-1	CDS		Hypothetical protein	NA		1.5	7.97	0.01222	4.55	9.5	0.00078	0.06	7.48	0.86556	3.44	10.55	0.00053	0.29	7.6	0.24006	0.9	11.9	0.08318	0.16	11.53	0.41027	0.27	11.58	0.65467	-0.49	7.21	0.31259	-0.29	7.3	0.4963	1.03	7.96	0.08266	-0.06	7.59	0.75555	-0.03	7.6	1	-0.2
	THC0290_N_0373	634387	634452	-1	Region	intra	new TR			1.68	10.86	0.00627	4.33	12.19	0.00103	0.51	10.49	0.08235	2.89	12.77	0.00053	0.11	10.62	0.80451	0.84	14.54	0.08809	0.04	14.14	0.90631	0.26	14.24	0.40654	-0.15	10.17	0.62624	-0.5	9.99	0.10214	1.08	10.78	0.01803	0.39	10.49	0.10726	0.01	10.3	1	-0.16
	THC0290_0518	634453	634626	-1	CDS		Conserved protein of unknown function	THC0290_v2_0542		1.44	10.58	0.00412	3.96	11.83	0.00085	0.14	10.09	0.63488	2.9	12.53	0.00053	0.14	10.16	0.69615	0.74	13.91	0.14318	0.42	13.75	0.18759	0.48	13.78	0.21593	-0.24	9.9	0.459	-0.44	9.8	0.12029	0.88	10.46	0.0246	-0.04	10.14	0.90972	-0.13	10.1	1	-0.1
	THC0290_N_0374	634627	634806	-1	Region	intra	new TR			1.66	9.41	0.00298	4.54	10.85	0.00078	0.41	8.93	0.0588	3.25	11.71	0.00053	0.14	9.08	0.81425	1.04	13.85	0.08318	0.16	13.41	0.61115	0.36	13.52	0.38277	-0.36	8.55	0.20877	-0.62	8.42	0.06191	0.99	9.23	0.01656	0.47	9.05	0.43575	0.02	8.83	1	-0.09
	THC0290_N_0375	634732	634818	1	Region	repeated_region	new TR			0	4.33	1	0.92	4.79	0.44072	-0.44	4.58	0.19688	0.32	4.15	0.03246	-0.18	4.11	0.47029	2.65	5.36	0.15622	2.3	5.19	0.02861	0.83	4.45	0.43827	-0.07	4.76	0.89659	0.18	4.88	0.74975	-0.6	4.5	0.13475	0.24	4.09	0.33996	-0.01	3.96	1	-0.79
	THC0290_0519	634807	635154	-1	CDS		Conserved protein of unknown function	THC0290_v2_0543		0.61	10.91	0.01612	1.61	11.42	0.00144	-0.51	10.39	0.03984	3.54	12.25	0.00053	0.11	10.51	0.65777	0.89	12.18	0.09046	1.04	12.26	0.04712	0.23	11.86	0.5297	-0.27	10.51	0.29933	-0.36	10.47	0.26812	-0.07	10.61	0.81126	0.02	10.64	0.9083	-0.04	10.61	1	0.02
	THC0290_0520	635151	635951	-1	CDS		Probable transcriptional regulator	THC0290_v2_0544		0.38	10.62	0.04199	1.56	11.21	0.00269	-0.37	10.12	0.10635	3.29	12.06	0.00053	0.22	10.35	0.34894	0.93	12.18	0.09201	1.74	12.59	0.02834	1.36	12.4	0.05393	-0.14	10.24	0.57893	-0.21	10.2	0.47531	0.08	10.35	0.7376	-0.23	10.29	0.14583	0.01	10.41	1	-0.01
	THC0290_0521	637705	637932	-1	CDS		Protein of unknown function	THC0290_v2_0545		-0.09	3.95	0.48415	-0.03	3.98	0.81798	-0.05	4.17	0.88777	2.06	5.33	0.1006	-0.16	4	0.61091	0.57	4.28	0.42265	1.38	4.69	0.3888	3.5	5.75	0.02773	-0.21	4.09	0.6036	-0.18	4.1	0.65503	-0.12	4.13	0.74825	0.51	4.22	0.34277	0.34	4.13	1	-0.01
	THC0290_0522	637937	638200	-1	CDS		Hypothetical protein	THC0290_v2_0546		0.03	4.04	0.83195	-0.05	4	0.74663	0.02	4.05	0.91097	1.39	4.71	0.21333	-0.11	4	0.59265	0.48	4.25	0.12178	1.35	4.69	0.38549	2.42	5.22	0.21504	-0.04	4.02	0.88526	0.05	4.06	0.90166	-0.1	3.99	0.60775	0.18	4.04	0.26843	-0.02	3.93	1	-0.17
	THC0290_0523	638334	638645	1	CDS		Transposase IS3 family, OrfA	THC0290_v2_0547		0.11	10.41	0.37705	0.85	10.77	0.0046	-0.39	10.41	0.14784	0.6	10.37	0.00598	0.29	10.26	0.18337	0.39	11.54	0.27145	0.56	11.63	0.08522	0.55	11.62	0.27943	-0.37	10.42	0.26058	-0.33	10.44	0.27964	-0.41	10.4	0.24036	0.11	10.38	0.39257	0.06	10.35	1	-0.23
	THC0290_0524	638696	639541	1	CDS		Transposase IS3 family, OrfB	THC0290_v2_0548		-0.09	9.94	0.51176	0.75	10.36	0.00708	-0.48	10.06	0.06414	0.88	10.23	0.00998	0.25	9.81	0.29648	0.13	11.04	0.57396	0.19	11.07	0.31549	0.53	11.24	0.14712	-0.25	10.17	0.37681	-0.25	10.17	0.34654	-0.37	10.11	0.1624	-0.04	9.92	0.77504	-0.05	9.91	1	-0.15
	THC0290_N_0376	640464	640566	-1	Region	3prime	new TR			1.21	11.74	0.00477	2.26	12.26	0.00159	0.61	11.46	0.04665	1.31	12.77	0.00187	0.16	11.51	0.37559	0.61	13.27	0.12463	-0.04	12.94	0.86121	-0.26	12.84	0.35769	-0.43	10.95	0.20285	-0.43	10.95	0.17648	0.89	11.6	0.02708	0.67	11.45	0.00817	0.13	11.18	1	-0.15
	THC0290_0525	640567	641241	-1	CDS		Hypothetical protein	THC0290_v2_0551		1.54	11.5	0.00318	1.65	11.55	0.00185	1.12	11.2	0.01003	0.72	12.07	0.00542	0.15	11.65	0.66248	0.11	13.1	0.64481	-0.41	12.84	0.11025	0.06	13.08	0.81747	-0.41	10.44	0.32875	-0.58	10.35	0.07041	1.26	11.28	0.01173	1.12	11.4	0.0042	0.09	10.89	1	0
	THC0290_N_0377	641242	642097	-1	Region	repeated_region	new TR			0.29	9.81	0.42575	0.72	10.02	0.0337	-1.39	9.27	0.00839	1.84	10.56	0.00055	0.23	9.39	0.27015	0.83	11.21	0.15435	0.03	10.81	0.94699	0.61	11.1	0.24473	0.17	10.05	0.47707	0.05	9.99	0.86511	-0.05	9.94	0.77162	0.28	9.26	0.21102	0.2	9.22	1	-0.15
	THC0290_0526	642217	643776	1	CDS		Transposase IS1182 family	THC0290_v2_0553		1.14	7.39	0.00422	3.63	8.64	0.00078	0.55	7.23	0.03653	4.13	9.89	0.00055	0.08	7.14	0.68819	1.6	11.55	0.08475	1.52	11.51	0.04318	0.98	11.24	0.32296	0.3	7.11	0.32689	0.25	7.08	0.26927	1.25	7.58	0.00969	1.63	8.16	0.00245	-0.03	7.33	1	0.08
	THC0290_0527	643868	645070	1	CDS		Transposase IS256 family	THC0290_v2_0554		-1.1	10.99	0.00413	-1.41	10.83	0.00172	-0.76	11.31	0.01214	0.56	11	0.06082	0.3	11.39	0.30415	0.21	10.4	0.3651	0.2	10.39	0.32228	0.96	10.77	0.133	-0.33	11.53	0.20138	-0.34	11.52	0.17675	0.08	11.73	0.64715	-0.65	11.06	0.0071	-0.02	11.37	1	-0.1
	THC0290_N_0378	645071	645304	1	Region	repeated_region	new TR			0.51	7.6	0.15454	1.31	8	0.00896	-0.09	7.39	0.5055	1.32	7.85	0.09844	0.03	7.43	0.87765	2.07	8.16	0.09046	1.58	7.91	0.07147	1.7	7.97	0.14157	-0.25	7.32	0.32875	-0.22	7.33	0.3092	-0.15	7.37	0.38018	0.05	7.19	0.74069	0.25	7.29	1	-0.47
	THC0290_N_0379	645195	645300	-1	Region	repeated_region	new TR			0.86	10.09	0.01222	1.69	10.51	0.00238	0.35	9.91	0.07119	1.76	11.32	0.00136	0.07	9.89	0.80277	0.39	11.62	0.15792	-0.05	11.4	0.80005	0.47	11.66	0.33573	-0.24	9.61	0.32688	-0.1	9.68	0.6815	0.71	10.09	0.02462	0.61	9.84	0.02243	0.03	9.55	1	-0.09
	THC0290_0528	645301	645954	-1	CDS		Probable phosphatase/phosphohexomutase	THC0290_v2_0555		-0.37	8.22	0.05903	0.1	8.45	0.49539	-0.63	8.2	0.02356	4.16	9.13	0.00053	0.28	8.07	0.22405	-0.23	8.8	0.5463	0.12	8.97	0.8239	-0.69	8.57	0.73112	0.11	8.57	0.6731	0.39	8.71	0.17039	-0.27	8.38	0.27323	-0.07	8.35	0.62143	-0.16	8.3	1	0.03
	THC0290_N_0380	645955	646130	-1	Region	intra	new TR			-0.15	8.71	0.28311	0.2	8.88	0.17552	-0.72	8.58	0.01539	3.64	9.71	0.00053	0.21	8.41	0.33136	0.12	9.33	0.75541	-0.02	9.27	0.96588	-0.02	9.27	0.96621	0.11	9	0.66207	0.07	8.98	0.80769	-0.41	8.74	0.11341	0.2	8.81	0.1981	-0.19	8.62	1	0.2
	THC0290_0529	646131	646511	-1	CDS		Hypothetical protein	THC0290_v2_0556		-0.33	9.25	0.0513	-0.97	8.93	0.02814	-0.52	9.26	0.02218	3.28	10.02	0.00112	0.41	9.17	0.19428	-0.54	9.14	0.2201	-0.9	8.96	0.07127	-1.18	8.82	0.1327	0.04	9.54	0.87315	0.14	9.59	0.53172	-0.5	9.27	0.04098	0.28	9.44	0.08448	0.05	9.33	1	0.09
	THC0290_N_0381	646512	647059	-1	Region	repeated_region	new TR			0.65	10.68	0.01644	1.8	11.25	0.00133	-0.4	10.39	0.04333	1.45	11.26	0.00121	0.14	10.54	0.61703	0.21	12.01	0.4515	-0.22	11.8	0.3578	0.29	12.05	0.45348	0.06	10.62	0.79965	0.08	10.63	0.76305	-0.35	10.42	0.11143	0.53	10.73	0.04085	-0.04	10.44	1	-0.09
	THC0290_0530	647060	648847	-1	CDS		Probable S41 family peptidase precursor	THC0290_v2_0557		0.19	10.7	0.23397	-0.58	10.31	0.22377	-0.33	10.62	0.08259	2.99	11.11	0.00053	0.21	10.65	0.32772	-0.41	10.48	0.19305	-0.67	10.36	0.07395	-0.61	10.39	0.11609	0.08	10.83	0.73615	0.32	10.94	0.26693	-0.32	10.63	0.11273	0.43	10.94	0.02905	-0.15	10.65	1	0.19
	THC0290_N_0382	648848	649035	-1	Region	intra	new TR			0.04	10.09	0.89528	0.13	10.13	0.78605	-0.08	9.91	0.68792	2.51	10.39	0.00055	0.45	9.93	0.2858	-0.11	10.33	0.72995	-0.77	10	0.10384	-0.66	10.06	0.36458	0.14	10.02	0.59503	0.38	10.14	0.23668	-0.17	9.86	0.43932	0.62	10.2	0.02687	0.01	9.9	1	-0.03
	THC0290_0531	649036	649524	-1	CDS		Protein of unknown function	THC0290_v2_0558		0.46	10.99	0.05181	0.62	11.07	0.25968	-0.15	10.84	0.32505	2.46	11.08	0.00053	0.26	10.77	0.40287	0.27	11.56	0.34691	0.01	11.43	0.95225	0.7	11.77	0.1534	0.03	10.93	0.91012	0.36	11.09	0.14871	-0.25	10.79	0.25077	0.51	11.26	0.04417	-0.22	10.9	1	-0.08
	THC0290_0532	649528	650709	-1	CDS		Probable plasmid maintenance system antidote protein	THC0290_v2_0559		-0.27	10	0.18363	0.44	10.35	0.04277	-0.59	9.91	0.04059	2.51	10.33	0.00053	0.52	9.8	0.06799	0.56	11.03	0.11007	0.44	10.97	0.1155	1.82	11.66	0.04095	-0.14	10.14	0.62084	0.02	10.22	0.95108	-0.17	10.12	0.52304	0.51	10.17	0.01697	0	9.92	1	0
	THC0290_N_0383	650730	650946	-1	Region	intra	new TR			0.91	11.18	0.03598	1.65	11.55	0.00142	-0.44	10.78	0.04344	0.93	11.74	0.00569	0.12	10.82	0.50512	0.48	12.53	0.23455	-0.24	12.16	0.4936	-0.18	12.19	0.64864	0	11	1	-0.06	10.97	0.80522	-0.22	10.89	0.26859	0.25	10.81	0.07279	0.17	10.77	1	-0.09
	THC0290_0533	650947	651456	-1	CDS		Hypothetical protein	THC0290_v2_0560		0.14	11.36	0.49468	-0.35	11.11	0.08739	-0.15	11.21	0.28369	1.06	11.88	0.00127	0.11	11.41	0.67496	-0.07	11.81	0.81598	-0.61	11.54	0.07598	-0.91	11.39	0.06893	-0.04	11.27	0.86254	0.02	11.3	0.92449	-0.11	11.23	0.4799	-0.64	11.2	0.01752	-0.22	11.41	1	-0.03
	THC0290_0534	651449	651640	-1	CDS		Hypothetical protein	THC0290_v2_0561		0.23	11.23	0.25583	0.07	11.15	0.67402	-0.05	11.13	0.70318	0.97	11.94	0.00161	0.06	11.38	0.81614	0.11	11.95	0.7023	-0.73	11.53	0.062	-1.29	11.25	0.05634	-0.05	11.13	0.84429	0.05	11.18	0.84932	-0.27	11.03	0.16391	-0.45	11.04	0.02003	0.03	11.28	1	0.12
	THC0290_N_0384	651641	651988	-1	Region	repeated_region	new TR			1.21	10.48	0.01309	2.45	11.1	0.00095	-0.48	10.09	0.05187	0.54	11.12	0.01738	0.04	10.39	0.92064	0.62	12.45	0.30919	0.11	12.2	0.81924	0.14	12.21	0.8424	0.05	10.36	0.86507	-0.09	10.29	0.80522	-0.37	10.15	0.13871	0.75	10.61	0.01711	-0.12	10.18	1	-0.15
	THC0290_0535	651989	652948	-1	CDS		Protein of unknown function	THC0290_v2_0562		0.43	11.54	0.02879	0.54	11.59	0.0267	0.18	11.29	0.30861	1.04	12.31	0.00887	0.22	11.57	0.35921	0.05	12.47	0.83795	-0.32	12.29	0.19047	-0.31	12.29	0.40036	0.06	11.22	0.88719	0.16	11.28	0.58253	0.12	11.25	0.54698	-0.04	11.33	0.82771	0.03	11.36	1	-0.01
	THC0290_0536	652945	653490	-1	CDS		Hypothetical transmembrane protein	THC0290_v2_0563		-0.08	10.64	0.62927	0.35	10.86	0.07527	-0.43	10.44	0.0375	2.09	11.95	0.00055	0.35	10.75	0.19544	0.48	11.99	0.12075	0.21	11.86	0.31853	-0.22	11.64	0.46513	0.08	10.7	0.74505	-0.02	10.65	0.95391	0.4	10.86	0.06346	0.57	10.82	0.01506	0.01	10.54	1	-0.01
	THC0290_N_0385	653491	653740	-1	Region	repeated_region	new TR			1.47	10.96	0.02184	2.27	11.37	0.00117	-0.13	10.24	0.46669	0.96	11.69	0.00198	0.22	10.77	0.38291	0.8	12.61	0.2039	0.33	12.38	0.37447	0.64	12.53	0.21593	0.13	10.37	0.6317	-0.02	10.3	0.9288	0.57	10.59	0.05426	0.71	10.72	0.00817	0.02	10.38	1	-0.27
	THC0290_N_0386	653742	653834	-1	Region	repeated_region	new TR			0.69	10.85	0.02988	1.01	11.01	0.0031	0.01	10.4	0.96343	1.53	12.1	0.00115	0.23	10.68	0.25423	0.49	12.05	0.12638	0.09	11.85	0.81286	0.46	12.04	0.52398	0.27	10.53	0.38202	0.16	10.47	0.5974	0.52	10.65	0.08825	0.59	10.63	0.01604	0.18	10.42	1	-0.02
	THC0290_0537	653835	655004	-1	CDS		Protein of unknown function	THC0290_v2_0564		0.59	11.64	0.01883	0.02	11.35	0.93961	0.4	11.52	0.05789	1.19	12.45	0.00317	0.25	11.79	0.26448	0.34	12.57	0.35413	-0.25	12.28	0.26984	-0.81	12	0.07588	0.21	11.42	0.46309	0.36	11.5	0.16426	0.46	11.55	0.07014	0.39	11.72	0.03105	0.05	11.55	1	0.12
	THC0290_N_0387	655005	655084	-1	Region	5prime	new TR			0.69	12.34	0.0127	0.91	12.45	0.01008	0.53	12.23	0.04869	1.19	13.07	0.00237	0.04	12.35	0.84367	0.85	13.57	0.08971	0.66	13.48	0.23598	1.07	13.68	0.07751	0.31	12.12	0.23331	0.06	11.99	0.81734	0.42	12.17	0.0649	0.58	12.39	0.01588	0.05	12.13	1	-0.03
	THC0290_0538	655176	655784	-1	CDS		Protein of unknown function	THC0290_v2_0565		0.55	11.79	0.01808	1.05	12.04	0.01318	0.43	11.65	0.04824	0.87	12.41	0.00422	0.18	12.01	0.51657	0.52	13.45	0.12304	0.01	13.2	0.9654	0.95	13.67	0.06142	0.08	11.48	0.81312	0.04	11.45	0.90939	0.46	11.67	0.04538	0.58	11.98	0.01588	0.07	11.73	1	-0.06
	THC0290_N_0388	655785	656570	-1	Region	repeated_region	new TR			-0.21	9.17	0.56197	0.29	9.42	0.18621	-0.88	9.01	0.01645	2.69	9.96	0.00053	0.16	8.95	0.54473	0.93	10.33	0.08809	0.08	9.9	0.73578	0.48	10.1	0.20674	0.41	9.66	0.2398	0.34	9.62	0.23223	0.39	9.65	0.12343	-0.1	8.65	0.80293	0.28	8.84	1	0.08
	THC0290_0539	656571	656978	-1	CDS		Hypothetical protein	THC0290_v2_0567		0.68	10.86	0.02973	0.97	11	0.02087	0.18	10.85	0.5604	1.33	10.4	0.00163	0.05	10.86	0.82115	0.62	11.49	0.26394	0.48	11.43	0.15499	0.18	11.27	0.52887	-0.2	10.66	0.62727	0.28	10.9	0.4603	0.33	10.92	0.43021	-0.8	10.42	0.01261	-0.06	10.79	1	0.1
	THC0290_0540	656981	657529	-1	CDS		Hypothetical protein	THC0290_v2_0568		1.28	11.62	0.00566	1.39	11.67	0.00307	0.55	11.31	0.08219	-0.06	11.21	0.60156	0.03	11.41	0.92106	0.68	12.42	0.09088	0.54	12.35	0.06243	0.44	12.3	0.21542	-0.13	10.97	0.70182	0.07	11.07	0.84939	0.23	11.15	0.49785	-0.12	11.08	0.54465	0.23	11.25	1	-0.16
	THC0290_0541	657526	658596	-1	CDS		Probable transmembrane protein of unknown function	THC0290_v2_0569		-0.1	8.56	0.57726	0.05	8.63	0.80807	-0.05	8.53	0.8379	0.55	8.56	0.03708	0.17	8.66	0.48243	0.18	9.45	0.47071	-0.11	9.3	0.70248	0.28	9.49	0.58248	-0.09	8.51	0.78042	-0.08	8.52	0.82069	0.06	8.59	0.86706	-0.38	8.31	0.03721	0.05	8.52	1	0.09
	THC0290_N_0389	658597	659019	-1	Region	indep	new TR			0.83	9.86	0.02129	1.11	10	0.00582	-0.24	9.57	0.41324	-0.01	10.13	0.93172	0.29	10.04	0.27698	0.67	10.82	0.10745	0.97	10.97	0.06296	0.83	10.9	0.14744	-0.09	9.64	0.82342	-0.16	9.6	0.63444	-0.13	9.62	0.69126	-0.27	9.74	0.0965	-0.09	9.83	1	-0.08
	THC0290_N_0390	658610	658815	1	Region	indep	new TR			2.71	9.44	0.01034	4.04	10.1	0.00078	1.19	8.53	0.01645	-1.21	9.95	0.00375	-0.16	9.26	0.44097	2.01	11.59	0.07605	2.36	11.77	0.03752	2.53	11.85	0.02964	0.13	8	0.775	0.59	8.23	0.13237	0.61	8.24	0.14519	0.4	9.15	0.13893	0.08	9	1	-0.27
	THC0290_N_0391	659021	659380	-1	Region	intra	new TR			0.52	9.28	0.01808	0.68	9.36	0.0099	-0.11	8.95	0.48004	-0.18	9.75	0.14377	0.09	9.34	0.70969	0.32	10.13	0.26013	-0.07	9.94	0.74604	0.68	10.31	0.09248	0.02	9.01	0.94156	-0.08	8.96	0.7886	-0.12	8.94	0.53031	-0.07	9.07	0.65089	-0.06	9.08	1	0.11
	THC0290_0542	659381	659842	-1	CDS		Hypothetical protein	THC0290_v2_0573		0.18	8.91	0.3298	0.1	8.88	0.58604	-0.2	8.54	0.17282	-0.02	9.23	0.91967	0.19	8.86	0.43346	0.37	9.85	0.22181	0.09	9.72	0.75605	0.74	10.04	0.0968	0.26	8.77	0.29811	0.12	8.7	0.64213	-0.24	8.52	0.26285	0.21	8.73	0.09843	0.16	8.7	1	-0.21
	THC0290_N_0392	659843	659917	-1	Region	5prime	new TR			0.23	11.09	0.55932	0.54	11.24	0.16211	-0.71	10.82	0.04395	0.27	11.55	0.07582	0.23	11.35	0.28096	0.44	11.91	0.29909	0.59	11.99	0.0852	0.91	12.15	0.08474	0.12	11.23	0.75127	-0.01	11.17	0.97812	-0.13	11.11	0.62734	-0.32	11.24	0.0753	-0.24	11.28	1	-0.31
	THC0290_0543	660017	661417	-1	CDS		Hypothetical protein	THC0290_v2_0574		-0.43	7.61	0.02858	1.8	8.73	0.00115	-1.04	7.41	0.0094	3.26	9.18	0.00053	0.01	7.35	0.99068	0.18	10.65	0.56528	0.03	10.57	0.89988	-0.06	10.52	0.8166	0.72	8.29	0.06553	0.65	8.25	0.05048	-0.05	7.9	0.76044	0.36	7.91	0.1886	0.18	7.82	1	-0.05
	THC0290_N_0393	661643	662054	-1	Region	repeated_region	new TR			1.21	11.19	0.01161	3.02	12.1	0.00119	-0.67	10.96	0.01368	0.21	10.69	0.14748	-0.21	10.46	0.40551	0.95	12.92	0.09046	0.56	12.73	0.07224	0.22	12.56	0.51737	-0.43	11.08	0.1498	-0.43	11.08	0.11735	-0.62	10.98	0.02578	0.29	11.05	0.19243	0.22	11.01	1	-0.24
	THC0290_N_0394	661670	662043	1	Region	repeated_region	new TR			0.81	6.87	0.02215	2.62	7.77	0.00677	0.02	6.47	0.95095	3.95	9.58	0.00053	0.39	6.76	0.13776	1.36	12.07	0.12398	1.11	11.94	0.12228	0.32	11.55	0.59482	-0.94	5.99	0.22343	-1.49	5.71	0.0468	2.88	7.9	0.01041	0.3	5.73	0.09212	0.17	5.67	1	-0.74
	THC0290_0544	662247	663131	1	CDS		Transposase IS982 family	THC0290_v2_0576		0	11.32	1	0.45	11.54	0.03837	0.24	11.31	0.14248	1.28	11.75	0.00815	0.14	11.54	0.54308	0.96	13.35	0.12053	1.14	13.44	0.04213	1.5	13.62	0.0595	-0.12	11.13	0.60898	-0.14	11.12	0.65862	1	11.69	0.01586	-0.03	11.14	0.82905	0.11	11.21	1	-0.08
	THC0290_0545	663927	664523	-1	CDS		Hypothetical protein	THC0290_v2_0579		-0.69	4.66	0.02569	0.29	5.14	0.73226	-0.28	4.67	0.18377	1.89	5.26	0.02326	-0.11	4.16	0.74383	1	5.4	0.09732	2.41	6.11	0.03562	2.65	6.23	0.20286	0.49	5.06	0.16218	-0.2	4.71	0.38421	-0.08	4.77	0.65774	0.31	4.51	0.20505	0.06	4.39	1	0.31
	THC0290_0546	664709	665848	-1	CDS		Restriction endonuclease	THC0290_v2_0580		-0.92	5.05	0.00574	-0.02	5.51	0.91891	-0.97	4.8	0.07033	2.85	5.93	0.00055	0.12	4.61	0.58727	1.63	6.37	0.27361	1.05	6.08	0.27326	1.17	6.14	0.65065	0.62	5.6	0.17764	0.27	5.42	0.43995	-0.03	5.27	0.92279	0.15	5.13	0.56753	0.04	5.07	1	0.39
	THC0290_0547	665845	666240	-1	gene		Truncated cytosine-specific modification methyltransferase, C-terminal region	THC0290_v2_0581		-0.41	6.11	0.14374	0.14	6.38	0.71455	-0.76	6.09	0.04467	3.55	6.63	0.0008	-0.17	5.41	0.65331	1.2	7.82	0.14599	0.84	7.64	0.23577	0.79	7.61	0.23449	0.07	6.51	0.86046	-0.24	6.35	0.28859	-0.25	6.35	0.35724	0.72	5.95	0.0116	0.51	5.85	1	-0.22
	THC0290_N_0395	666241	666640	-1	Region	repeated_region	new TR			0.16	8.3	0.55037	0.87	8.65	0.01642	-0.2	8.16	0.2577	1.85	8.44	0.0035	0.23	7.87	0.33182	0.81	9.4	0.25081	0.57	9.28	0.14852	1.13	9.57	0.05123	-0.32	8.09	0.20506	-0.23	8.14	0.29783	0.12	8.32	0.53446	0.33	8.06	0.14468	0.08	7.93	1	0.06
	THC0290_0548	666641	667414	-1	CDS		Protein of unknown function	THC0290_v2_0583		-0.07	10.13	0.7082	-0.15	10.09	0.73028	-0.13	10.16	0.54779	1.23	9.33	0.00237	0.17	9.86	0.3817	0.83	10.61	0.10673	0.54	10.46	0.09295	0.55	10.47	0.13895	-0.46	10	0.13431	-0.41	10.02	0.14089	0.32	10.39	0.1657	0.23	10.03	0.08191	0.08	9.96	1	-0.08
	THC0290_0549	667418	668239	-1	gene		Truncated cytosine-specific modification methyltransferase, N-terminal region	THC0290_v2_0584		0.05	10.61	0.79919	1.03	11.1	0.00355	-0.3	10.43	0.15597	0.86	10.25	0.00207	0.36	10.23	0.15152	0.71	11.77	0.09641	0.87	11.85	0.03898	0.49	11.66	0.17619	-0.54	10.31	0.12334	-0.38	10.39	0.17993	0.16	10.66	0.45056	0.59	10.66	0.02039	-0.08	10.32	1	-0.11
	THC0290_N_0396	668261	668748	-1	Region	intra	new TR			1.65	7.37	0.00412	4.17	8.63	0.00078	0.99	6.7	0.0094	1.55	8.44	0.002	-0.01	6.84	0.98714	0.63	10.72	0.11743	0.14	10.47	0.58134	-0.38	10.21	0.47197	0.17	6.29	0.45703	0.26	6.33	0.24226	0.98	6.69	0.01397	1.4	7.39	0.00251	-0.16	6.6	1	0.17
	THC0290_0550	668749	669369	-1	CDS		Protein of unknown function	THC0290_v2_0586		1.35	9.35	0.00579	2.93	10.14	0.00082	0.3	8.82	0.27458	1.17	10.58	0.00245	0.19	9.28	0.40606	0.65	12.18	0.10935	0.32	12.02	0.23443	-0.08	11.81	0.7917	0.04	8.69	0.92656	0.08	8.71	0.84317	0.78	9.07	0.0482	1.62	9.64	0.00394	0.11	8.88	1	0
	THC0290_N_0397	669370	670142	-1	Region	repeated_region	new TR			0.8	8.41	0.03678	2.01	9.02	0.00216	-0.73	7.86	0.01196	2.8	9.56	0.00053	0.19	8.14	0.35701	1.31	10.89	0.08405	0.77	10.62	0.09461	1.28	10.88	0.09435	0.07	8.27	0.81167	0.01	8.23	0.96903	0.33	8.39	0.14335	0.18	8.23	0.18491	-0.07	8.11	1	-0.07
	THC0290_0551	670143	673139	-1	CDS		Putative DNA or RNA helicase	THC0290_v2_0587		0.14	8.38	0.65756	1.32	8.97	0.00236	0.21	8.27	0.41622	1.15	8.74	0.00238	0.36	8.54	0.1638	-0.02	10.16	0.98739	-0.1	10.12	0.84633	-0.36	9.99	0.35606	0.21	8.27	0.52345	0.29	8.31	0.46564	0.65	8.49	0.06911	0.33	8.67	0.06814	-0.05	8.48	1	0.42
	THC0290_N_0398	673140	674020	-1	Region	5prime	new TR			1.09	9.48	0.00413	2.7	10.28	0.00084	0.41	8.93	0.03653	0.41	10.62	0.0683	0.25	9.32	0.25969	0.69	12.28	0.10361	-0.15	11.86	0.63234	0.41	12.13	0.27422	0.24	8.84	0.30735	0.1	8.77	0.66596	0.85	9.15	0.01554	1.1	9.44	0.00603	0.08	8.93	1	0.16
	THC0290_0552	673195	673554	1	CDS		Hypothetical protein	NA		0.19	4	0.25794	0.53	4.17	0.22125	0.06	4.04	0.75421	0.33	4.14	0.03572	-0.03	3.98	0.88274	1.14	4.55	0.45524	2.08	5.01	0.3953	2.53	5.24	0.07503	-0.09	3.96	0.74307	-0.05	3.98	0.85929	-0.08	3.97	0.69305	0.03	3.94	0.77882	0.14	4	1	-0.05
	THC0290_0553	674578	675384	-1	CDS		Hypothetical protein	THC0290_v2_0590		-0.67	7.96	0.01671	0.73	8.66	0.00719	-0.66	7.88	0.04147	-0.88	7.6	0.04866	0.32	7.96	0.16258	0.9	9.76	0.08417	0.22	9.41	0.33885	-0.53	9.04	0.16976	0.06	8.24	0.8586	-0.1	8.16	0.72543	-0.37	8.02	0.14132	-0.01	8.17	0.96741	-0.21	8.07	1	0.05
	THC0290_N_0399	675385	675715	-1	Region	repeated_region	new TR			1.09	10.41	0.01684	2.17	10.95	0.00226	-0.54	9.99	0.0406	0.36	10.85	0.08527	0.04	10.31	0.89905	1.05	12.21	0.08318	0.46	11.92	0.10858	0.63	12	0.25836	-0.02	10.25	0.95782	-0.06	10.23	0.86728	-0.42	10.05	0.09697	0.55	10.5	0.01735	-0.14	10.15	1	-0.36
	THC0290_0554	675716	676768	-1	CDS		Hypothetical protein precursor	THC0290_v2_0592		-1.05	7.85	0.00718	-0.8	7.97	0.07704	-0.54	8.13	0.02155	-0.19	7.27	0.51565	0.36	7.79	0.15814	0.78	8.94	0.20908	0.81	8.95	0.15787	1.64	9.37	0.10791	0.05	8.42	0.82856	0.23	8.51	0.31453	-0.48	8.16	0.04062	-0.25	8.07	0.06685	-0.07	8.16	1	0.08
	THC0290_N_0400	676790	676957	-1	Region	repeated_region	new TR			-1.08	8	0.00619	-1.2	7.94	0.14362	-1.04	8.17	0.01191	1.09	8.24	0.0025	0.09	7.86	0.64554	0.91	8.62	0.27579	0.9	8.62	0.29411	1.35	8.84	0.22752	0.12	8.75	0.79752	0.22	8.8	0.36486	-0.31	8.53	0.15648	-0.13	8.22	0.67588	0	8.28	1	0.12
	THC0290_0555	676958	678358	-1	CDS		Probable type II restriction endonuclease Sau3AI	THC0290_v2_0593		-0.65	8.43	0.01678	-0.74	8.38	0.0775	-0.43	8.53	0.10138	-0.92	7.7	0.0077	0.09	8.2	0.61703	0	7.77	1	-0.3	7.62	0.5506	0.19	7.86	0.53551	0.2	8.85	0.50641	0.15	8.82	0.6321	-0.09	8.7	0.71813	-0.18	8.5	0.33702	-0.11	8.53	1	0.01
	THC0290_0556	678342	679628	-1	CDS		Probable type II modification methyltransferase Sau3AI	THC0290_v2_0594		-0.84	9.27	0.0167	-0.14	9.62	0.69346	-0.31	9.22	0.07899	-0.76	8.94	0.00542	0.28	8.9	0.21216	0.34	9.78	0.37173	-0.68	9.27	0.0567	0.06	9.64	0.91732	0.24	9.5	0.31023	0.32	9.54	0.23843	0	9.38	0.99745	-0.34	9.08	0.03734	-0.1	9.2	1	0.15
	THC0290_0557	679618	679926	-1	CDS		Putative DNA binding protein	THC0290_v2_0595		-0.67	9.32	0.01556	0.39	9.85	0.34396	-0.45	9.3	0.05165	-0.61	9.16	0.0257	0.3	8.97	0.20232	0.64	10.2	0.09201	0.47	10.11	0.14931	1.17	10.46	0.10269	0.16	9.61	0.53759	0.17	9.61	0.49801	-0.21	9.42	0.30648	-0.3	9.14	0.05984	0.06	9.32	1	0.12
	THC0290_N_0401	679945	680245	-1	Region	repeated_region	new TR			1.17	10.47	0.02734	2.21	10.99	0.00175	-0.45	10.01	0.04255	0.13	10.68	0.42318	0.13	10.34	0.6265	0.78	12.33	0.15665	0.04	11.96	0.91271	0.49	12.18	0.34998	-0.03	10.21	0.90069	-0.22	10.12	0.35797	-0.3	10.08	0.1691	0.78	10.4	0.00714	0.15	10.09	1	-0.22
	THC0290_0558	680341	681156	-1	CDS		Protein of unknown function	THC0290_v2_0596		0.25	8.5	0.11375	0.66	8.7	0.00903	-0.24	8.16	0.14094	-0.21	8.83	0.23274	0.3	8.69	0.1987	0.26	9.49	0.36456	-0.66	9.03	0.09295	-1.37	8.67	0.0738	0.04	8.3	0.90075	-0.06	8.25	0.85456	0.21	8.38	0.24566	-0.11	8.35	0.36646	-0.01	8.4	1	-0.08
	THC0290_N_0402	681157	681235	-1	Region	repeated_region	new TR			0.32	9.03	0.12272	0.71	9.22	0.0148	-0.36	8.79	0.06028	0.24	9.35	0.0644	0.32	9.19	0.34614	0.72	10.51	0.1044	0.34	10.32	0.23443	1.2	10.75	0.05219	0	8.98	1	0.01	8.98	0.97028	0.42	9.18	0.06493	-0.32	9.07	0.03624	-0.21	9.12	1	0.1
	THC0290_N_0403	681237	681325	-1	Region	intra	new TR			0.16	7.27	0.31069	0.72	7.55	0.02523	0.04	6.98	0.79984	1.67	7.92	0.00072	0.31	7.14	0.26385	0.14	8.92	0.61747	-2.79	7.46	0.04258	-4.94	6.38	0.02773	0.21	7.07	0.39829	0.16	7.04	0.56105	0.54	7.23	0.04006	0.14	7.13	0.40047	0.06	7.09	1	0
	THC0290_0559	681326	681646	-1	CDS		Protein of unknown function	THC0290_v2_0597		0.69	8.55	0.05375	1.35	8.88	0.00802	-0.08	8.27	0.54943	1.06	8.61	0.01488	0.22	8.53	0.41214	0.22	10.21	0.41239	-0.9	9.65	0.04015	-0.78	9.71	0.07657	0.14	8.38	0.53503	0.26	8.44	0.32507	0.63	8.62	0.02889	0.04	8.47	0.82168	0	8.45	1	-0.09
	THC0290_0560	681664	682242	-1	CDS		Protein of unknown function	THC0290_v2_0598		0.33	8.1	0.06212	1.52	8.69	0.00333	0	7.86	0.99205	1.21	8.43	0.00564	0.33	7.96	0.15987	0.3	10.08	0.30282	-1.63	9.11	0.03119	-1.9	8.97	0.03738	0.1	7.91	0.73949	0.38	8.05	0.16949	0.75	8.23	0.02597	0.32	7.99	0.06277	0.03	7.84	1	0.17
	THC0290_0561	682255	683376	-1	CDS		Hypothetical protein	THC0290_v2_0599		0.57	8.26	0.02693	2.2	9.07	0.00318	0.09	7.91	0.60214	1.44	8.87	0.00266	0.3	8.06	0.17802	0.55	10.86	0.13093	-0.6	10.29	0.10932	0.21	10.69	0.64814	0.36	8.04	0.20907	0.35	8.04	0.17288	0.94	8.33	0.01976	0.9	8.28	0.0042	0.17	7.91	1	0.02
	THC0290_N_0404	683377	684734	-1	Region	repeated_region	new TR			0.43	9.73	0.08592	1.48	10.25	0.00179	-1.02	9.33	0.00892	2.33	10.51	0.00053	0.17	9.4	0.39701	0.96	11.43	0.12187	-0.17	10.87	0.61881	0.44	11.17	0.36401	-0.04	9.82	0.89422	-0.16	9.76	0.48068	0.34	10.01	0.13459	0.48	9.58	0.09997	0.04	9.36	1	-0.08
	THC0290_0562	684806	685303	-1	CDS		Protein of unknown function	THC0290_v2_0600		-0.79	8.58	0.01373	-1.67	8.14	0.02241	-0.68	8.72	0.01372	-1.83	7.86	0.00078	0.21	8.9	0.32598	-0.19	7.86	0.67606	-0.22	7.85	0.65348	1.59	8.75	0.06759	0.03	9.07	0.90965	0.38	9.25	0.16202	-0.06	9.02	0.69346	-0.63	8.68	0.00913	-0.04	8.98	1	0.03
	THC0290_0563	685304	686401	-1	CDS		Protein of unknown function	THC0290_v2_0601		-0.93	9.32	0.00556	-1.62	8.97	0.01317	-0.81	9.38	0.01101	-1.86	8.29	0.00064	0.3	9.54	0.17808	0.32	8.58	0.28444	0.22	8.53	0.33659	-0.72	8.06	0.73062	0.19	9.88	0.5094	0.41	9.99	0.14713	-0.08	9.74	0.66427	-0.7	9.33	0.00713	0.02	9.69	1	-0.11
	THC0290_N_0405	686402	686639	-1	Region	intra	new TR			-1.1	7.67	0.00413	-1.04	7.7	0.00942	-0.72	7.69	0.01208	-2.08	6.65	0.00354	0.39	7.79	0.13037	-0.58	6.28	0.40952	0.52	6.83	0.61168	0.17	6.65	0.93194	0.27	8.19	0.29488	0.35	8.23	0.17831	-0.85	7.63	0.01842	-0.43	7.73	0.16667	-0.13	7.88	1	0.11
	THC0290_0564	686640	687575	-1	CDS		Hypothetical protein	THC0290_v2_0602		-0.95	8.34	0.01795	-0.68	8.48	0.03449	-0.87	8.3	0.01049	-2.44	7.2	0.00212	0.2	8.51	0.29521	0.34	8.11	0.19244	-0.17	7.86	0.3888	-1.4	7.24	0.63472	0.26	8.86	0.3273	0.29	8.87	0.23843	-0.68	8.39	0.02256	-0.38	8.35	0.03264	-0.02	8.53	1	0.1
	THC0290_N_0406	687576	687677	-1	Region	5prime	new TR			-0.52	9.27	0.1886	0.16	9.61	0.63381	-1.02	9.18	0.01472	-1.11	8.32	0.00175	0.46	9.33	0.26424	0.81	9.78	0.15489	0.64	9.69	0.13892	1.04	9.89	0.1586	0.17	9.78	0.57773	0.17	9.78	0.57576	-0.59	9.4	0.05093	-0.4	9.35	0.05271	-0.13	9.48	1	-0.17
	THC0290_N_0407	687604	688071	1	Region	repeated_region	new TR			2.01	5.04	0.00699	4.49	6.28	0.00078	0.35	4.66	0.35932	-0.06	4.47	0.74431	0.12	4.58	0.82247	2.09	8.29	0.10935	1.44	7.96	0.09326	1.64	8.06	0.28861	-0.55	4.21	0.25226	-0.53	4.22	0.23998	-0.05	4.46	0.90673	-0.06	4.18	0.84309	0.08	4.25	1	-0.6
	THC0290_0565	687769	689262	-1	CDS		Protein of unknown function, putative reverse transcriptase (RNA-dependent DNA polymerase)	THC0290_v2_0603		-0.64	7.6	0.01201	-0.76	7.54	0.09504	-0.67	7.62	0.01319	-0.52	6.31	0.05936	0.19	7.55	0.31128	0.3	8.25	0.32328	-0.96	7.62	0.04258	-0.63	7.79	0.22773	-0.01	7.95	0.97711	-0.1	7.9	0.63303	-0.52	7.7	0.03396	0.07	7.61	0.5125	-0.03	7.56	1	0.14
	THC0290_N_0408	689263	689589	-1	Region	repeated_region	new TR			1	10.77	0.0261	2.05	11.29	0.00103	-0.71	10.36	0.01196	0.37	11.46	0.09695	0.3	10.73	0.40779	0.93	12.31	0.10673	0.28	11.99	0.3367	0.79	12.24	0.11452	-0.05	10.69	0.86108	-0.38	10.52	0.13085	-0.03	10.7	0.87136	0.71	10.78	0.01638	0.09	10.47	1	-0.36
	THC0290_0566	689590	690501	-1	CDS		Hypothetical transmembrane protein	THC0290_v2_0605		-0.51	8.38	0.02964	1.25	9.26	0.00216	-0.78	8.4	0.01614	-0.93	7.58	0.0421	0.13	8.14	0.49612	-0.59	9.59	0.10331	-0.64	9.56	0.06175	-0.43	9.67	0.18807	0.1	8.84	0.74099	0.43	9	0.13085	-0.4	8.59	0.09339	0.34	8.57	0.08714	-0.15	8.33	1	-0.05
	THC0290_N_0409	690502	690661	-1	Region	intra	new TR			0.26	10.42	0.14745	1.48	11.03	0.00164	-0.75	10.1	0.01204	-0.11	10.24	0.33006	0.26	10.16	0.27093	0	11.59	1	-0.1	11.54	0.79818	0.3	11.74	0.44104	0.09	10.52	0.73356	-0.01	10.47	0.96932	-0.29	10.33	0.20951	0.08	10.24	0.53002	-0.07	10.16	1	-0.15
	THC0290_0567	690662	692281	-1	CDS		Probable modification methyltransferase	THC0290_v2_0606		-0.57	10.14	0.02184	0.41	10.63	0.05695	-0.77	10.14	0.01482	-0.28	9.39	0.10917	0.29	9.86	0.21301	-0.5	10.9	0.11626	-0.49	10.91	0.07269	-1.06	10.62	0.08816	0.22	10.63	0.37971	0.41	10.73	0.12465	-0.3	10.37	0.13831	0.38	10.28	0.02338	-0.09	10.04	1	0.11
	THC0290_0568	692281	693381	-1	CDS		Probable restriction endonuclease	THC0290_v2_0607		-0.59	11.43	0.01619	-0.12	11.66	0.66586	-0.68	11.44	0.01792	-0.03	10.9	0.79186	0.26	11.22	0.23472	0.31	12.19	0.20861	0.26	12.16	0.26344	-0.1	11.99	0.75911	0.21	11.88	0.40446	0.38	11.97	0.14718	-0.48	11.54	0.06365	0.18	11.5	0.14592	0.04	11.43	1	0.02
	THC0290_N_0410	693406	693624	-1	Region	repeated_region	new TR			-1.35	10.61	0.00649	-2.12	10.22	0.00175	-1.5	10.69	0.00822	0.53	10.36	0.05897	0.46	10.65	0.15603	-0.36	11.02	0.2226	-0.58	10.91	0.12801	-1.53	10.44	0.04511	0.03	11.45	0.95049	0.17	11.52	0.58253	-0.42	11.23	0.1068	-0.06	11.14	0.80321	-0.23	11.05	1	0.12
	THC0290_0569	693625	694329	-1	CDS		Protein of unknown function	THC0290_v2_0608		-1.18	10.67	0.00652	-1.56	10.48	0.00449	-1.06	10.94	0.01119	0.24	10.66	0.22876	0.51	10.91	0.26586	-0.32	11.25	0.29854	-0.63	11.09	0.07395	-1.01	10.9	0.24818	0.04	11.49	0.8696	0.1	11.51	0.67651	-0.28	11.33	0.1723	0.3	11.43	0.2272	-0.13	11.21	1	0.19
	THC0290_0570	694331	695638	-1	CDS		Protein of unknown function	THC0290_v2_0609		-0.45	10.7	0.02684	0.03	10.94	0.86106	-0.75	10.76	0.01662	0.19	10.61	0.10043	0.42	10.74	0.11501	0.01	12.07	0.98113	-0.36	11.89	0.1155	-1.05	11.54	0.05109	0.04	11.16	0.89172	0.21	11.24	0.42394	-0.19	11.04	0.38938	1.49	11.6	0.00245	-0.14	10.79	1	-0.01
	THC0290_N_0411	695663	696066	-1	Region	repeated_region	new TR			0.68	11.91	0.05591	1.54	12.34	0.00274	-0.55	11.4	0.02163	0.27	12.04	0.07853	0.02	11.38	0.93098	0.38	13.46	0.36612	-0.43	13.06	0.17695	-0.74	12.9	0.2103	-0.01	11.67	0.95978	-0.09	11.63	0.68364	-0.36	11.5	0.10229	0.16	11.41	0.17802	-0.04	11.31	1	-0.14
	THC0290_0571	696067	696396	-1	CDS		Hypothetical protein	THC0290_v2_0611		1.03	12.8	0.00689	1.98	13.28	0.00115	-0.17	12.61	0.48624	-0.52	12.35	0.0158	-0.06	12.61	0.83264	0.11	13.95	0.67267	-0.01	13.89	0.96164	0.06	13.92	0.81493	0.15	12.77	0.6599	0.09	12.73	0.80686	-0.44	12.47	0.17791	0.18	12.54	0.3231	0.03	12.47	1	-0.16
	THC0290_N_0412	696397	696658	-1	Region	repeated_region	new TR			0.66	9.82	0.05137	2.28	10.63	0.00185	-0.64	9.56	0.04033	1.48	10.16	0.0056	0.31	9.23	0.27698	0.41	12.39	0.21662	0.45	12.41	0.14945	0.66	12.51	0.16553	0.37	10.07	0.26225	0.12	9.94	0.71257	-0.42	9.67	0.19246	0.69	9.58	0.01251	0.07	9.27	1	-0.07
	THC0290_N_0413	696660	696739	-1	Region	intra	new TR			-1.15	7.89	0.00502	0.31	8.62	0.23213	-1.32	7.92	0.00822	3.5	8.46	0.00053	0.27	7.78	0.23268	0.31	10.03	0.62555	0.54	10.15	0.51464	1.07	10.41	0.39206	0.98	9.07	0.06743	0.73	8.94	0.04615	-0.88	8.14	0.03663	0.22	7.64	0.2408	0.01	7.53	1	0.05
	THC0290_0572	696740	697474	-1	CDS		Hypothetical lipoprotein precursor	THC0290_v2_0612		-1.62	7.12	0.00302	-0.41	7.72	0.26304	-2.29	6.9	0.01058	3.16	8.19	0.00055	0.77	7.04	0.13271	-0.05	9.38	0.90366	-0.68	9.07	0.15316	-0.8	9	0.14903	0.99	8.54	0.08109	0.98	8.53	0.04197	-1.45	7.32	0.01228	-0.5	6.73	0.02871	-0.1	6.93	1	0.04
	THC0290_N_0414	697475	697762	-1	Region	repeated_region	new TR			-0.47	10	0.11483	0.27	10.37	0.29236	-1.3	9.72	0.00885	1.49	10.6	0.00113	0.25	9.91	0.29426	0.38	10.71	0.17867	-0.32	10.36	0.26039	-0.17	10.43	0.58275	0.34	10.54	0.26854	0.22	10.48	0.34986	-0.41	10.16	0.1682	0.17	9.81	0.208	0.02	9.74	1	-0.1
	THC0290_0573	697763	698500	-1	CDS		Hypothetical protein	THC0290_v2_0613		-1.82	7.83	0.00579	-0.51	8.49	0.15897	-2.04	7.91	0.00865	2.64	9.05	0.00053	0.67	8.05	0.05112	-0.14	9.39	0.50388	-0.96	8.98	0.04179	-0.6	9.16	0.10425	0.67	9.26	0.1703	0.84	9.35	0.09753	-1.23	8.31	0.02358	-0.24	7.81	0.21009	-0.08	7.88	1	0.22
	THC0290_N_0415	698501	698961	-1	Region	repeated_region	new TR			0.25	11.21	0.35777	1.38	11.77	0.00278	-0.92	10.79	0.03255	1.18	11.76	0.01094	0.31	10.96	0.38707	0.64	12.52	0.18783	0.29	12.35	0.50567	0.24	12.32	0.7583	0.32	11.41	0.39095	0.16	11.33	0.70284	-0.41	11.04	0.31845	0.41	10.92	0.09327	0.16	10.8	1	-0.17
	THC0290_0574	698962	700197	-1	CDS		Major facilitator superfamily (MFS) permease	THC0290_v2_0614		-0.25	10.15	0.20393	0.56	10.55	0.05121	-0.85	9.89	0.01187	1.35	11.3	0.00138	0.23	10.12	0.35921	-0.18	11.05	0.49655	-0.68	10.8	0.0645	-1.53	10.38	0.08767	0.6	10.61	0.08359	0.32	10.47	0.21221	0.03	10.33	0.85521	0.5	10.32	0.01683	-0.07	10.04	1	0.24
	THC0290_N_0416	700198	700330	-1	Region	intra	new TR			-0.34	10.05	0.47491	0.72	10.58	0.07404	-1.15	9.81	0.00839	1.68	10.64	0.00098	0.47	9.8	0.21726	1.09	11.25	0.08824	1.53	11.46	0.05943	1.49	11.45	0.04325	0.44	10.61	0.17199	0.34	10.56	0.26754	-0.6	10.09	0.02602	0.25	9.83	0.12842	0.27	9.85	1	-0.09
	THC0290_0575	700331	701341	-1	CDS		Transposase IS3 family	THC0290_v2_0615		-1.41	9.32	0.00442	-0.91	9.57	0.00937	-1.59	9.33	0.00822	2.51	10.31	0.00053	0.53	9.32	0.12095	0.33	10.01	0.24097	-0.15	9.77	0.48302	-0.35	9.67	0.37984	0.39	10.32	0.26224	0.45	10.35	0.13301	-0.51	9.87	0.05208	0.08	9.3	0.57471	0.09	9.31	1	0
	THC0290_0576	701362	701715	-1	CDS		Transposase IS3 family	THC0290_v2_0616		-0.86	10.41	0.00573	-0.02	10.83	0.90799	-1.54	10.3	0.00822	1.67	10.81	0.00072	0.42	10.49	0.13654	0.56	11.02	0.10704	0.09	10.78	0.6208	0.25	10.86	0.36335	0.13	11.14	0.7011	0.32	11.23	0.25504	-0.55	10.8	0.03174	-0.16	10.36	0.29958	-0.1	10.4	1	-0.17
	THC0290_N_0417	701716	701820	-1	Region	repeated_region	new TR			-0.78	11.02	0.02639	-0.14	11.34	0.50249	-1.44	10.87	0.00839	1.7	11.25	0.00066	0.53	11.04	0.11718	0.81	11.39	0.1044	0.16	11.06	0.73945	0.05	11.01	0.92297	0.05	11.61	0.86254	0.14	11.66	0.53754	-0.57	11.3	0.03362	-0.2	10.88	0.31517	0.05	11	1	-0.15
	THC0290_N_0419	701857	702286	-1	Region	repeated_region	new TR			0	10.75	1	0.36	10.93	0.05323	-1.02	10.41	0.01003	1.2	10.74	0.00438	0.31	10.69	0.40534	0.82	11.61	0.13377	0.11	11.25	0.68287	0.56	11.47	0.22023	-0.07	10.88	0.81342	-0.07	10.88	0.8212	-0.35	10.74	0.11223	0.27	10.6	0.12073	0.13	10.53	1	-0.12
	THC0290_0577	702287	703369	-1	CDS		Protein of unknown function	THC0290_v2_0618		-0.87	11.85	0.00924	-2	11.29	0.00191	-0.57	12.03	0.01968	0.52	10.85	0.01234	0.18	12.14	0.34894	-0.75	9.97	0.09046	-0.4	10.14	0.15515	-0.16	10.26	0.76569	0.17	12.4	0.47114	0.21	12.41	0.3478	-0.56	12.03	0.03287	-0.56	11.78	0.01314	0.05	12.08	1	0.07
	THC0290_0578	703366	704418	-1	CDS		Site-specific DNA-methyltransferase (adenine-specific)	THC0290_v2_0619		-0.73	11.84	0.01186	-1.97	11.22	0.00175	-0.52	11.89	0.02856	0.31	10.88	0.06068	0.26	12.01	0.21549	-0.35	9.94	0.28851	-0.35	9.94	0.1948	-0.84	9.7	0.07048	0.16	12.23	0.52737	0.19	12.24	0.39547	-0.52	11.89	0.04152	-1.06	11.25	0.00373	-0.02	11.77	1	0.08
	THC0290_N_0420	704419	704581	-1	Region	5prime	new TR			-0.1	11.34	0.79959	-0.45	11.16	0.04355	-0.99	11.26	0.01274	0.03	10.41	0.79281	0.39	11.42	0.33367	0.51	10.37	0.20536	0.07	10.15	0.85323	-0.03	10.1	0.97777	-0.02	11.74	0.95049	0.07	11.79	0.8531	-0.68	11.41	0.02565	-0.71	11.04	0.01055	0.19	11.49	1	-0.18
	THC0290_0579	704607	705650	-1	CDS		Integrase/recombinase	THC0290_v2_0620		0.38	11.18	0.14146	0.11	11.04	0.41878	-0.1	10.94	0.7954	-1.11	10.8	0.00758	-0.03	11.28	0.91342	0.67	10.74	0.15673	0.58	10.69	0.11462	0.54	10.67	0.18827	-0.54	10.72	0.26101	-0.79	10.6	0.14089	-0.23	10.88	0.64817	0.35	11.31	0.04753	-0.05	11.11	1	0.03
	THC0290_N_0421	705651	706023	-1	Region	intra	new TR			-0.27	9.98	0.3253	-0.45	9.89	0.06361	-0.29	10.03	0.43311	-0.94	8.71	0.02599	0.06	10.02	0.86461	-0.15	10.33	0.65888	-0.29	10.26	0.31696	-0.35	10.23	0.4885	-0.29	10.03	0.52854	-0.28	10.03	0.51739	-0.38	9.98	0.415	-0.42	10	0.04974	-0.14	10.14	1	-0.17
gpmI	THC0290_0580	706024	707541	-1	CDS		2,3-bisphosphoglycerate-independent phosphoglycerate mutase	THC0290_v2_0621	gpmI	-0.02	11.83	0.94356	0.17	11.93	0.30076	-0.22	11.71	0.63488	-1.1	11.03	0.00497	0.17	12.07	0.59265	0.14	11.29	0.72456	0.07	11.26	0.78762	-0.71	10.87	0.14305	0.12	11.88	0.82456	0.01	11.82	0.99336	-0.25	11.69	0.67666	-0.68	11.86	0.03204	-0.13	12.14	1	-0.08
	THC0290_N_0422	707542	707627	-1	Region	5prime	new TR			-0.15	8.44	0.77918	0.79	8.91	0.07704	-0.24	8.3	0.47516	1.15	7.6	0.032	0.2	8.41	0.44097	0.71	8.98	0.22578	0.39	8.82	0.73812	0.84	9.05	0.13827	0.46	8.65	0.2841	0.19	8.52	0.64768	-0.12	8.36	0.76978	-0.21	8.45	0.5479	-0.01	8.55	1	-0.52
	THC0290_0581	707782	708492	1	CDS		Protein of unknown function	THC0290_v2_0622		1.7	9.54	0.00298	2.45	9.92	0.00092	0.98	9.15	0.01243	2.56	10.44	0.00062	-0.08	9.89	0.69073	0.74	11.89	0.15185	0.21	11.62	0.45156	-0.03	11.5	0.92611	-0.37	8.47	0.21025	-0.48	8.42	0.12126	2.04	9.68	0.00606	-0.29	9.18	0.14879	-0.11	9.27	1	-0.08
	THC0290_N_0423	708013	708480	-1	Region	3prime	new TR			1.36	6.69	0.01739	0.19	6.1	0.4775	0.65	7.09	0.04744	1.94	7.66	0.00131	-0.6	6.6	0.36607	-0.33	6.46	0.87496	0.21	6.73	0.74604	-0.79	6.24	0.23431	-0.11	6.72	0.69504	-0.45	6.54	0.17125	0.57	7.05	0.04861	0.24	6.24	0.54348	-0.51	5.86	1	-0.45
	THC0290_0582	708481	710181	-1	CDS		Protein of unknown function containing peptidoglycan binding domain	THC0290_v2_0623		1.92	9.92	0.00298	1.65	9.79	0.0029	1.33	9.55	0.0145	0.95	10.81	0.00569	-0.06	9.85	0.79044	-0.58	10.48	0.32803	-0.18	10.68	0.43084	-0.57	10.48	0.18358	0.46	9.12	0.22568	0	8.89	0.99802	1.85	9.81	0.01281	0.09	9.21	0.55342	0.03	9.18	1	0.11
	THC0290_N_0424	708493	708688	1	Region	3prime	new TR			1.2	8.02	0.00424	2.3	8.56	0.00103	0.76	7.63	0.03324	4.14	9.61	0.00064	0.04	8.18	0.87767	0.61	9.78	0.27435	0.48	9.71	0.14624	-1.14	8.91	0.11882	-0.62	6.93	0.1731	-0.73	6.88	0.08314	1.88	8.19	0.01066	-0.57	7.44	0.01761	-0.08	7.69	1	-0.05
	THC0290_N_0425	708689	709190	1	Region	3prime-PT	new TR			0.49	7.11	0.02493	1.25	7.48	0.00232	-0.1	6.75	0.49222	4.87	9.28	0.00053	-0.09	7.06	0.79698	1.1	9.05	0.08385	0.05	8.52	0.9499	-0.56	8.22	0.68103	-0.8	6.4	0.15331	-0.98	6.31	0.03187	1.11	7.35	0.01483	-0.31	6.55	0.12263	0.09	6.75	1	-0.1
yitI	THC0290_0583	710191	710622	-1	CDS		Acetyltransferase, GNAT family, YitI	THC0290_v2_0624	yitI	1.63	9.38	0.0188	1.65	9.39	0.00432	-0.04	9.05	0.82283	1.72	10.79	0.00086	0.08	9.36	0.70971	-0.08	10.06	0.91509	0.05	10.12	0.93047	1.48	10.83	0.08505	-0.33	8.9	0.21904	0	9.06	1	1.77	9.95	0.0069	0.11	9.21	0.62027	0.07	9.19	1	-0.26
	THC0290_N_0426	710623	710986	-1	Region	3prime-PT	new TR			3.06	7.13	0.00152	1.67	6.44	0.00185	2.23	6.5	0.00822	-3.15	6.9	0.00101	-0.19	7.44	0.53244	-0.75	7.46	0.23972	-0.2	7.73	0.52991	-1.22	7.22	0.62932	0.1	5.43	0.66722	-0.24	5.26	0.27445	0.97	5.87	0.01254	1.14	6.55	0.01017	0.17	6.06	1	0.47
	THC0290_N_0427	710823	710903	1	Region	5prime	new TR			0.87	6.2	0.00619	2.15	6.84	0.00189	-0.05	6.22	0.88661	4.41	7.35	0.00072	0.39	6.31	0.42378	0.34	7.95	0.30707	-1.92	6.82	0.40734	-0.8	7.38	0.70361	-0.37	6.06	0.50806	-0.59	5.95	0.25868	1.16	6.83	0.0482	-0.01	6.03	0.9775	0.09	6.08	1	-0.29
	THC0290_tRNA_0012	710904	710976	1	tRNA		transfer RNA-Gly			2.31	11	0.11429	4.25	11.97	0.00651	-0.63	10.28	0.02744	0.64	11.2	0.24035	0.2	10.3	0.75306	1.7	13.22	0.20857	1.12	12.93	0.18839	1.83	13.28	0.15152	-0.51	10.34	0.36388	0.02	10.6	0.97537	-0.15	10.52	0.48276	1.23	11.6	0.02523	-0.05	10.96	1	-1.05
pepE	THC0290_0584	711012	711719	-1	CDS		Dipeptidase E	THC0290_v2_0626	pepE	1.61	10.53	0.00442	1.69	10.57	0.00144	0.76	10.1	0.02424	-2.72	10.42	0.00087	0.04	10.77	0.87765	-0.21	10.3	0.60147	0.04	10.42	0.82443	0.09	10.45	0.75988	0	9.72	1	-0.04	9.7	0.91165	-0.39	9.52	0.18684	0.44	10.41	0.04485	0.01	10.19	1	0.11
	THC0290_0585	711836	712555	1	CDS		Protein of unknown function precursor	THC0290_v2_0627		-1.42	7.54	0.00339	-1.48	7.51	0.0168	-1.31	8.07	0.01505	1.29	6.77	0.02601	-0.21	7.4	0.31053	0.47	9.17	0.12508	-0.04	8.92	0.85124	0.85	9.36	0.25508	0.92	9.18	0.07275	0.74	9.09	0.11587	0.96	9.2	0.04358	-0.33	7.82	0.03341	-0.02	7.98	1	-0.2
	THC0290_0586	712569	713072	1	CDS		Protein of unknown function	THC0290_v2_0628		-0.56	7.81	0.01918	-0.4	7.89	0.08549	-0.82	8.17	0.05491	0.12	6.85	0.74856	0.11	7.78	0.59535	0.15	8.42	0.6987	-1.04	7.82	0.0753	-0.54	8.07	0.26769	0.39	8.78	0.34859	0.56	8.86	0.26963	0.74	8.95	0.11458	-0.34	7.94	0.03465	-0.12	8.05	1	-0.24
	THC0290_0587	713131	715374	1	CDS		Probable M1 family aminopeptidase precursor	THC0290_v2_0629		0.47	11.02	0.02869	-0.07	10.75	0.66889	0.14	11.06	0.43032	-0.38	10.95	0.03351	-0.22	11.42	0.29797	-0.06	11.68	0.80305	0.14	11.78	0.41585	0.77	12.09	0.08373	0.4	11.19	0.17822	0.22	11.1	0.42015	0.87	11.43	0.01593	-0.1	11.2	0.60678	0.05	11.27	1	-0.2
	THC0290_N_0430	715403	715513	-1	Region	3prime	new TR			-0.96	7.91	0.02928	-0.62	8.09	0.17566	-0.49	8.1	0.03255	1.96	8.23	0.00295	0.32	8.49	0.37307	0.31	8.58	0.6981	0.26	8.56	0.65792	0.4	8.62	0.29497	-0.11	8.28	0.63528	0.11	8.4	0.66651	0.45	8.56	0.08344	-0.42	8.1	0.06395	-0.22	8.19	1	0.07
	THC0290_0588	715514	716959	-1	CDS		Probable amino acid-transporting permease	THC0290_v2_0630		-1.48	9.31	0.006	-2	9.05	0.00158	-1.1	9.32	0.00863	1.92	9.71	0.0008	0.38	9.95	0.17684	-0.11	8.11	0.78506	-0.67	7.83	0.29649	-0.36	7.99	0.47791	-0.14	9.8	0.55865	-0.16	9.79	0.50894	0.51	10.12	0.03754	-0.43	9.45	0.03065	0.15	9.74	1	-0.03
ruvB	THC0290_0589	717168	718190	1	CDS		Holliday junction DNA helicase RuvB	THC0290_v2_0631	ruvB	-0.17	10.08	0.46383	0.4	10.37	0.07527	-0.36	10.03	0.06996	-0.73	9.39	0.0128	-0.04	9.97	0.90542	0.09	9.56	0.70634	0.14	9.58	0.76313	1.21	10.12	0.04565	0.3	10.36	0.23582	0.31	10.36	0.27197	-0.25	10.08	0.26662	-0.22	10.15	0.15847	0.04	10.28	1	-0.02
	THC0290_N_0431	718191	718260	1	Region	3prime	new TR			-0.87	9.34	0.00883	-1.1	9.22	0.00548	-0.68	9.7	0.01472	-0.06	8.95	0.59522	0.09	9.21	0.7755	-0.61	7.91	0.51646	-0.21	8.11	0.41469	0.25	8.34	0.48823	0.15	10.11	0.61659	0.28	10.18	0.28691	-0.47	9.8	0.04904	-0.35	9.33	0.05217	0.02	9.52	1	-0.06
	THC0290_0590	718261	719187	1	CDS		Putative 4Fe-4S binding protein	THC0290_v2_0632		-1.56	7.39	0.00298	-2.49	6.93	0.00098	-0.83	7.89	0.01252	0.37	6.53	0.34255	0.16	7.47	0.46152	-0.39	5.57	0.79874	0.1	5.82	0.91636	-0.05	5.74	0.98225	0.06	8.34	0.86192	0.17	8.39	0.47375	-0.33	8.14	0.12174	-1.12	7.28	0.00322	-0.03	7.82	1	0.02
maeB	THC0290_0591	719251	721566	1	CDS		Malate dehydrogenase (oxaloacetate-decarboxylating) (NADP+)	THC0290_v2_0633	maeB	-0.61	11.49	0.02359	-1.13	11.23	0.00258	-0.24	11.53	0.26883	-1.22	11.2	0.0015	-0.01	11.59	0.95079	-0.31	10.11	0.22438	-0.68	9.92	0.04896	-0.79	9.87	0.08481	0.16	11.73	0.59002	0.11	11.7	0.72548	0.22	11.76	0.38219	0.01	11.66	0.97869	0.01	11.66	1	0.04
	THC0290_N_0432	721567	721639	1	Region	intra	new TR			-0.77	10.76	0.04371	-1.19	10.55	0.00259	-0.38	10.98	0.08025	-0.74	10.66	0.00459	0.18	10.95	0.36672	-0.62	9.34	0.10673	-0.88	9.21	0.09857	-0.59	9.36	0.15855	0.03	11.19	0.91481	0.14	11.24	0.5602	0.13	11.23	0.48442	0.16	11.02	0.26469	0.04	10.96	1	0.03
ruvA	THC0290_0592	721640	722221	1	CDS		Holliday junction DNA helicase RuvA	THC0290_v2_0634	ruvA	-0.9	11.1	0.01125	-1.49	10.81	0.00159	-0.48	11.22	0.03719	0.36	11.32	0.02362	0.26	11.28	0.23884	0.24	10.32	0.37882	0.01	10.2	0.97591	0.52	10.46	0.1469	-0.02	11.45	0.93171	-0.13	11.39	0.56269	0.17	11.55	0.41753	-0.07	11.29	0.6059	-0.08	11.28	1	-0.04
sprA	THC0290_0593	722225	729463	1	CDS		Putative adhesin precursor SprA	THC0290_v2_0635	sprA	-0.23	10.52	0.12743	-0.99	10.14	0.00429	-0.31	10.64	0.07698	0.1	10.21	0.30369	0.33	10.68	0.21469	-0.52	9.68	0.14599	-0.35	9.76	0.4099	-0.26	9.8	0.60227	-0.44	10.57	0.12436	-0.4	10.59	0.12118	0.87	11.23	0.01434	0.13	10.65	0.39031	0.01	10.59	1	0
	THC0290_N_0433	729464	729774	1	Region	intra	new TR			-0.68	9.17	0.04627	-1.32	8.85	0.00315	-0.41	9.63	0.08604	1.19	9.38	0.00189	0.58	9.48	0.18337	-0.21	8.42	0.58435	0.17	8.61	0.53573	-0.62	8.21	0.7583	-0.63	9.52	0.14833	-0.32	9.67	0.23837	0.61	10.14	0.0843	0.29	9.57	0.04468	-0.24	9.3	1	-0.27
	THC0290_0594	729775	729990	1	CDS		Conserved protein of unknown function	THC0290_v2_0636		-1.63	10.13	0.00402	-3.71	9.09	0.00086	-0.8	10.63	0.01219	0.55	10.19	0.01648	0.4	10.52	0.17684	-1.02	8.36	0.08303	-1.11	8.31	0.03649	-3.13	7.3	0.02773	-0.49	10.78	0.11814	-0.47	10.79	0.11459	0.08	11.07	0.67432	-0.36	10.13	0.10874	0.02	10.31	1	0.16
	THC0290_N_0434	729991	730208	1	Region	3prime	new TR			-1.4	11.38	0.00302	-3.1	10.53	0.00103	-0.85	11.73	0.03613	0.36	11.31	0.05773	0.53	11.73	0.13271	-0.36	9.72	0.30282	-0.7	9.55	0.16021	-0.61	9.6	0.48239	-0.58	11.87	0.17199	-0.36	11.98	0.30666	0.08	12.19	0.84417	-0.51	11.27	0.01932	-0.07	11.49	1	-0.15
	THC0290_N_0435	730209	730951	1	Region	intra	new TR			-1.8	10.53	0.00482	-2.65	10.1	0.00103	-0.96	10.9	0.00932	0.24	10.55	0.1131	0.4	10.85	0.20852	0.49	10.16	0.36914	0.46	10.14	0.1313	1.11	10.47	0.07922	-0.6	11.08	0.09024	-0.63	11.07	0.08504	0.1	11.43	0.59072	-0.34	10.28	0.05987	0.02	10.46	1	0.04
gcvH	THC0290_0595	730973	731353	1	CDS		Glycine cleavage system H protein	THC0290_v2_0640	gcvH	-0.11	13.45	0.48229	-0.95	13.03	0.006	-0.24	13.41	0.1774	-2.12	12.54	0.00072	0.02	13.82	0.9278	0.27	11.93	0.26821	0.53	12.06	0.12265	0.95	12.26	0.05448	0.08	13.58	0.79581	0.27	13.67	0.28282	-0.68	13.19	0.03025	-0.59	13.26	0.02079	0.04	13.57	1	-0.04
	THC0290_N_0436	731354	731426	1	Region	intra	new TR			-0.43	13.23	0.05655	-1.44	12.72	0.00247	-0.41	13.05	0.11217	-2.31	12.24	0.00053	-0.29	13.45	0.34894	-0.01	11.49	0.96577	-0.52	11.23	0.08814	-0.46	11.26	0.41418	0.1	13.31	0.74912	0.1	13.31	0.8093	-0.7	12.91	0.05193	-0.3	12.85	0.30659	-0.02	12.99	1	-0.24
fjo27	THC0290_0596	731427	731732	1	CDS		Conserved membrane protein of unknown function	THC0290_v2_0641		-0.38	13.37	0.07467	-1.58	12.77	0.00246	-0.23	13.32	0.51281	-2.27	12.36	0.00053	0.01	13.72	0.98272	0.01	11.5	0.99096	-0.33	11.33	0.3071	-0.33	11.33	0.40125	0.16	13.51	0.72984	0.36	13.61	0.44902	-0.59	13.14	0.25349	-0.66	13.07	0.09475	-0.03	13.38	1	-0.2
deoC	THC0290_0597	731804	732547	1	CDS		Deoxyribose-phosphate aldolase	THC0290_v2_0642	deoC	-1.23	10.32	0.00939	-1.79	10.04	0.00128	-0.82	10.44	0.01386	-2.47	9.35	0.00102	0	10.53	0.98932	0.12	8.41	0.80925	0.67	8.69	0.14945	0.19	8.45	0.51292	0.13	10.91	0.6036	0.23	10.96	0.30934	-0.68	10.51	0.02965	-1.04	10.17	0.00349	-0.04	10.66	1	0.12
	THC0290_0598	732558	734672	1	CDS		Uncharacterized protein	THC0290_v2_0643		-0.86	9.67	0.01116	-1.15	9.52	0.00668	-0.57	9.6	0.02112	-1.25	8.96	0.00599	0.06	9.71	0.77782	0.19	8.33	0.43573	0.22	8.34	0.66123	-0.13	8.17	0.93101	0.07	9.92	0.81253	0.24	10.01	0.27402	-0.26	9.76	0.17442	-0.62	9.47	0.0095	-0.01	9.78	1	0.03
	THC0290_N_0437	734570	734926	-1	Region	repeated_region	new TR			0.37	7.98	0.28695	-0.3	7.65	0.33594	-0.25	8.22	0.3229	0.73	7.34	0.00715	-0.54	7.9	0.16404	-1.65	6.59	0.47345	-0.43	7.2	0.1299	-0.26	7.29	0.81315	-0.73	7.99	0.06996	-0.11	8.3	0.90166	-0.46	8.12	0.10494	0.2	8.6	0.55722	-0.23	8.39	1	-0.39
	THC0290_N_0438	734673	735247	1	Region	repeated_region	new TR			0.78	6.92	0.2565	2.01	7.54	0.00629	-0.6	6.84	0.07149	-0.28	7.84	0.0589	-0.49	6.57	0.40101	-0.31	7.48	0.89757	-0.36	7.46	0.45625	0.53	7.9	0.60369	-0.15	7.07	0.66207	0.09	7.19	0.91165	-0.7	6.79	0.05458	0.22	6.68	0.32434	-0.11	6.51	1	-0.23
	THC0290_0599	735003	736340	-1	CDS		Probable membrane fusion efflux protein	THC0290_v2_0644		-0.08	11.96	0.66566	-0.82	11.59	0.00894	-0.72	11.77	0.01365	-0.69	11.49	0.02904	-0.53	12	0.05805	-0.89	10.67	0.08534	-0.26	10.98	0.2156	-0.56	10.83	0.13135	-0.29	11.98	0.25244	-0.16	12.04	0.50808	-0.36	11.95	0.0775	0.21	12.57	0.11383	-0.11	12.41	1	0.02
	THC0290_0600	736346	737788	-1	CDS		Probable outer membrane efflux protein precursor	THC0290_v2_0645		0.15	11.18	0.68309	0.21	11.21	0.19198	-0.6	10.88	0.01645	-0.02	10.55	0.85918	-0.64	10.91	0.10866	-0.03	10.53	0.95927	0.94	11.01	0.04441	1.93	11.51	0.03826	-0.45	10.95	0.1498	-0.17	11.09	0.57175	-0.45	10.95	0.07367	0.38	11.29	0.02772	0.07	11.13	1	-0.17
	THC0290_0601	737937	739331	1	CDS		Probable lipoprotein precursor	THC0290_v2_0646		0.22	8.78	0.21781	0.64	8.99	0.02464	-0.18	8.78	0.25423	-0.17	8	0.47106	0.08	8.67	0.71954	1.17	9.29	0.08318	1.83	9.62	0.02834	1.71	9.56	0.03738	-0.17	8.78	0.5064	-0.31	8.71	0.19704	-0.16	8.79	0.37828	-0.4	8.45	0.03264	0.17	8.73	1	-0.15
	THC0290_N_0440	738918	739331	-1	Region	3prime	new TR			0.42	8.62	0.07325	0.14	8.48	0.57822	0.41	8.8	0.07695	0.48	8.48	0.00834	-0.22	8.21	0.29138	-0.33	8.15	0.41813	-0.59	8.02	0.32665	-1.74	7.45	0.10425	-0.04	8.57	0.8667	-0.11	8.54	0.64439	0.63	8.91	0.02684	0.9	8.57	0.01126	0.2	8.22	1	0.2
	THC0290_0602	739332	739574	-1	CDS		Hypothetical transmembrane protein	THC0290_v2_0647		0.58	10.68	0.01454	-0.36	10.21	0.05665	0.4	10.66	0.09398	-0.15	10.35	0.15406	-0.28	10.12	0.25126	-0.54	9.37	0.22792	-1.02	9.13	0.12767	-0.44	9.42	0.34227	0.15	10.54	0.5999	0.08	10.51	0.76305	0.62	10.77	0.03863	0.58	10.53	0.01078	0.01	10.25	1	-0.08
	THC0290_N_0441	739332	739567	1	Region	3prime	new TR			0.46	8.66	0.02633	1.45	9.16	0.00335	-0.2	8.33	0.27154	-1.35	8.43	0.0008	-0.06	8.39	0.79499	1.48	8.85	0.08303	0.89	8.56	0.03659	0.81	8.52	0.21622	-0.15	8.36	0.73731	-0.03	8.41	0.91165	-0.34	8.26	0.21889	-0.3	8.36	0.19924	0.05	8.53	1	0.23
yozB	THC0290_0603	739564	740106	-1	CDS		YozB protein	THC0290_v2_0648	yozB	0.67	11.06	0.01396	-0.25	10.61	0.13582	0.35	11.06	0.10651	-0.1	10.62	0.32063	-0.19	10.63	0.50193	-0.34	10.23	0.35328	-0.49	10.16	0.15563	-0.31	10.25	0.37713	0.02	10.89	0.94102	0.16	10.96	0.52216	0.45	11.11	0.18003	0.5	10.92	0.02947	0.07	10.7	1	-0.04
	THC0290_N_0442	740107	740192	-1	Region	intra	new TR			0.49	9.55	0.05979	0.32	9.46	0.11507	0.5	9.62	0.03038	-0.03	9	0.8446	-0.06	9.18	0.82122	-0.61	9.33	0.18779	-1.25	9.02	0.08802	-4.18	7.55	0.09998	0.29	9.51	0.25858	0.44	9.59	0.11507	0.69	9.71	0.03466	0.89	9.59	0.0284	0.06	9.18	1	0.11
ypmQ	THC0290_0604	740193	740876	-1	CDS		Probable cytochrome c oxidase biogenesis protein YpmQ	THC0290_v2_0649	ypmQ	0.76	11.05	0.00689	0.08	10.7	0.79881	0.66	11.15	0.01386	-0.11	10.59	0.34883	-0.17	10.83	0.39745	-0.15	10.6	0.54299	-0.48	10.43	0.10207	-0.45	10.45	0.1633	0.23	10.94	0.37898	0.23	10.94	0.28157	0.58	11.11	0.05303	0.5	11.1	0.01408	0.09	10.89	1	-0.01
	THC0290_0605	740986	741660	-1	CDS		Protein of unknown function	THC0290_v2_0650		0.58	10.51	0.08896	0.14	10.29	0.37318	0.45	10.5	0.03007	0.58	10.22	0.02516	-0.3	9.93	0.36576	0.49	10.89	0.1266	1.02	11.16	0.03658	1.11	11.2	0.08267	0.36	10.46	0.16696	0.22	10.39	0.33018	0.47	10.51	0.05205	0.3	10.47	0.07484	-0.14	10.25	1	-0.2
	THC0290_N_0443	741661	741738	-1	Region	3prime	new TR			-0.42	5.14	0.44004	-0.87	4.92	0.22709	0.28	5.42	0.3001	-0.13	4.25	0.52636	0.15	4.2	0.67752	2.23	5.01	0.40556	0.44	4.12	0.3333	2.26	5.02	0.40036	0.89	5.72	0.11988	1.38	5.97	0.04197	0.15	5.36	0.62414	0.05	4.63	0.94991	-0.04	4.59	1	-0.68
	THC0290_0606	741739	742089	-1	CDS		Probable transmembrane protein of unknown function	THC0290_v2_0651		-0.44	13.58	0.04213	-0.83	13.38	0.00543	0.32	13.83	0.07402	-0.34	13.47	0.04239	-0.33	13.36	0.2339	-0.54	12.09	0.13298	-0.82	11.95	0.06602	-0.44	12.14	0.24116	-0.11	13.61	0.69657	-0.16	13.59	0.50675	0.22	13.78	0.38465	-0.29	13.35	0.04554	0.12	13.56	1	-0.02
	THC0290_0607	742118	743125	-1	CDS		Cytochrome c oxidase family protein	THC0290_v2_0652		-0.43	13.6	0.16586	-0.74	13.44	0.02956	0.26	13.97	0.10175	-0.26	13.46	0.05186	-0.22	13.59	0.33136	-0.62	12.35	0.09732	-0.66	12.33	0.05839	-0.24	12.54	0.51968	-0.03	13.82	0.91012	-0.21	13.73	0.34741	0.24	13.96	0.1795	-0.47	13.42	0.01464	0.03	13.67	1	0.11
ctaE	THC0290_0608	743166	743750	-1	CDS		Cytochrome c oxidase, subunit III	THC0290_v2_0653	ctaE	-0.03	11.12	0.85365	0.28	11.27	0.10529	0.14	11.37	0.59242	0.19	10.32	0.16382	0.06	10.8	0.74914	-0.78	10.76	0.087	-0.77	10.77	0.0776	-1.03	10.64	0.0511	0.42	11.51	0.24567	0.47	11.53	0.17675	-0.16	11.22	0.55022	-0.27	10.81	0.06668	0.11	11	1	0.03
cyoE	THC0290_0609	743756	744658	-1	CDS		Protoheme IX farnesyltransferase	THC0290_v2_0654	cyoE	-0.27	9.84	0.1839	0.59	10.27	0.03217	-0.09	10.12	0.58125	1.15	9.23	0.00147	0.03	9.5	0.90082	-0.59	9.99	0.14152	-0.57	10	0.06465	-1.6	9.49	0.09661	0.12	10.23	0.60762	-0.04	10.15	0.88898	-0.14	10.09	0.36912	-0.13	9.89	0.30382	0.01	9.96	1	0
	THC0290_0610	744842	745510	1	CDS		Peptidase, M22 family	THC0290_v2_0655		0.54	10.3	0.08423	1.7	10.89	0.0019	0.23	10.29	0.36709	-0.13	10.01	0.28306	-0.04	10.13	0.8546	0.39	11.66	0.1557	0.55	11.74	0.08253	0.33	11.63	0.2898	0.05	10.19	0.89592	-0.11	10.12	0.78287	0.34	10.34	0.27091	0.34	9.93	0.058	0.11	9.81	1	-0.05
	THC0290_N_0444	745438	745510	-1	Region	3prime	new TR			2.71	13.97	0.00368	2.67	13.94	0.00133	1.41	13.44	0.00839	-1.14	14.98	0.00329	-0.33	14	0.20997	0.3	15.59	0.54268	0.23	15.55	0.46542	-0.1	15.39	0.78359	0.09	12.78	0.77749	0.14	12.8	0.51742	0.15	12.81	0.36882	1.47	14.2	0.00336	-0.05	13.44	1	-0.18
	THC0290_0611	745511	745864	-1	CDS		Protein of unknown function	THC0290_v2_0656		2.53	12.63	0.00494	2.54	12.64	0.00289	1.23	12.08	0.00839	-0.65	13.86	0.00866	-0.28	12.49	0.34275	0.63	14.19	0.13603	1.25	14.5	0.02963	0.68	14.22	0.0875	0.38	11.66	0.169	0.38	11.66	0.15935	-0.05	11.44	0.78208	1.31	12.77	0.00251	0.01	12.12	1	-0.25
yyaL	THC0290_0612	745916	747976	-1	CDS		Protein of unknown function YyaL	THC0290_v2_0657	yyaL	0.01	10.33	0.97461	-0.22	10.22	0.21794	0.05	10.28	0.81713	-0.8	10.42	0.00962	0.09	10.46	0.7604	-0.71	9.42	0.31115	-0.57	9.48	0.10362	-1.02	9.26	0.08995	0.6	10.56	0.1008	0.55	10.53	0.09714	0.17	10.34	0.55952	0.2	10.51	0.30908	0.04	10.42	1	0.01
	THC0290_0613	748106	749002	-1	CDS		Protein of unknown function	THC0290_v2_0658		0.57	11.37	0.12158	1.98	12.07	0.00503	0.17	11.12	0.6409	0.01	11.16	0.96573	0.12	11.02	0.68566	0.56	12.4	0.15792	0.9	12.57	0.06721	-0.29	11.98	0.41739	0.6	11.33	0.24993	0.61	11.34	0.23035	-0.34	10.86	0.50662	0.94	11.95	0.00714	-0.07	11.44	1	-0.11
	THC0290_N_0445	749440	749519	1	Region	5prime	new TR			1.22	10.79	0.07595	1.45	10.9	0.01754	0.24	10.14	0.36067	0.05	10.82	0.81096	0.18	10.74	0.48945	1.02	11.46	0.10745	2.33	12.12	0.07322	2.1	12	0.1357	-0.28	9.89	0.46595	-0.4	9.83	0.22438	0.25	10.15	0.35809	0.35	10.29	0.03065	0.01	10.12	1	-0.59
	THC0290_0614	749520	750518	1	CDS		Protein of unknown function precursor	THC0290_v2_0660		0.4	12.23	0.09168	0.04	12.05	0.8732	0.35	12	0.13216	0.03	12.47	0.78632	-0.05	12.45	0.81219	-0.23	11.82	0.51325	-0.07	11.9	0.80147	0.08	11.97	0.84632	0.23	11.94	0.40774	0.06	11.85	0.86728	0.45	12.05	0.09945	0.18	11.99	0.39241	0	11.9	1	-0.01
	THC0290_N_0446	750519	750565	1	Region	3prime	new TR			0.25	4.86	0.3182	2.32	5.9	0.00122	0.62	4.83	0.49585	-0.33	5.16	0.38553	0.2	4.79	0.81219	0.6	5.03	0.75917	-0.72	4.37	0.4315	1.4	5.43	0.60925	0.95	4.99	0.26015	1.48	5.26	0.10134	0.9	4.97	0.21301	0.57	6.01	0.03235	-0.44	5.51	1	0.66
	THC0290_0615	750566	751084	1	CDS		Carbonic anhydrase/acetyltransferase family protein	THC0290_v2_0661		0.19	10.78	0.38436	1.15	11.26	0.00968	0.03	10.53	0.86802	0.83	11.31	0.00585	-0.05	10.54	0.80315	0.31	11.05	0.64647	0.75	11.27	0.22202	1.49	11.64	0.17588	0.64	10.83	0.07271	0.79	10.9	0.04465	0.39	10.7	0.07688	1.22	11.29	0.00544	0.08	10.72	1	0
	THC0290_N_0447	751085	752281	1	Region	3prime	new TR			0.53	8.36	0.18157	1.37	8.78	0.00553	-0.34	7.83	0.08666	1.37	9.51	0.00107	-0.06	7.94	0.89083	0.21	8.78	0.47506	-0.24	8.55	0.41156	0.36	8.86	0.71536	0.23	8.11	0.41588	0.53	8.26	0.08835	0.33	8.16	0.18703	0.78	8.09	0.01582	0.16	7.78	1	-0.1
murI	THC0290_0616	751461	752240	-1	CDS		Glutamate racemase	THC0290_v2_0662	murI	-0.42	9.48	0.29202	-0.36	9.51	0.12321	-0.89	9.24	0.18399	0.23	9.67	0.10863	0.31	9.45	0.49613	1.07	9.23	0.08405	1.5	9.45	0.03249	1.68	9.54	0.05219	0.37	9.87	0.59824	0.32	9.84	0.65862	-0.22	9.57	0.76844	-0.59	9.62	0.04902	-0.05	9.88	1	-0.23
	THC0290_N_0448	752241	752304	-1	Region	3prime	new TR			0.18	4.24	0.26787	0.15	4.23	0.36274	-0.12	4.18	0.79297	-0.18	3.94	0.15044	-0.26	4.09	0.32698	0.72	5.23	0.44535	0.59	5.17	0.76879	1.13	5.44	0.65131	-0.14	4.17	0.75613	0.15	4.31	0.74163	0.2	4.34	0.59884	0.46	4.17	0.27074	0.22	4.05	1	0.04
	THC0290_0617	752305	752805	-1	CDS		Outer membrane protein precursor OmpH family P18	THC0290_v2_0663		-0.75	13.62	0.12135	-2.65	12.67	0.0062	-0.69	13.78	0.01406	0.44	13.54	0.05907	0.24	13.99	0.46171	-0.16	12.87	0.81235	-0.63	12.64	0.20143	-0.39	12.76	0.39912	-0.19	14.03	0.46347	0.23	14.24	0.47909	0.63	14.44	0.07178	-0.24	13.89	0.44925	0.14	14.08	1	-0.18
skp	THC0290_0618	752849	753811	-1	CDS		Outer membrane chaperone precursor Skp (OmpH)	THC0290_v2_0664	skp	-1.24	12.1	0.00966	-2.3	11.57	0.01645	-0.73	12.51	0.01196	0.49	12.66	0.01624	0.14	12.36	0.65754	0.09	12.53	0.75779	0.02	12.49	0.95225	0.15	12.55	0.60555	0.37	13.06	0.18531	0.35	13.04	0.19536	0.96	13.35	0.02324	-0.45	12.37	0.02042	-0.08	12.56	1	-0.1
bamA	THC0290_0619	753852	756521	-1	CDS		Outer membrane protein assembly complex precursor, BamA	THC0290_v2_0665	bamA	-2.04	11.22	0.00224	-2.71	10.89	0.00103	-1.23	11.9	0.01214	0.33	10.37	0.02947	0.3	11.54	0.29138	0.18	11.81	0.47464	-0.48	11.49	0.10227	-1.01	11.22	0.06686	0.28	12.66	0.40288	0.36	12.7	0.30005	0.61	12.82	0.07742	-1.33	11.31	0.00276	0.03	11.98	1	-0.11
uppS	THC0290_0620	756505	757245	-1	CDS		Di-trans,poly-cis-decaprenylcistransferase	THC0290_v2_0666	uppS	-1.32	10.28	0.01	-0.09	10.89	0.52165	-1.12	10.87	0.01933	-0.51	9.82	0.02285	0.5	10.51	0.10673	0.23	11.66	0.33827	-0.05	11.52	0.84156	0.35	11.72	0.50684	-0.42	11.21	0.26058	-0.3	11.28	0.45917	0.52	11.69	0.16241	-1.64	10.08	0.00251	0	10.9	1	-0.26
	THC0290_0621	757252	757935	-1	CDS		Protein of unknown function precursor, putative outer membrane protein	THC0290_v2_0667		-1.55	10.02	0.00302	-0.14	10.72	0.6374	-1.13	10.46	0.01159	-0.09	9.5	0.3708	0.3	10.16	0.2665	0.26	11.19	0.27435	0.46	11.29	0.12873	1.14	11.63	0.04534	-0.24	10.9	0.39825	-0.26	10.89	0.34126	0.79	11.42	0.03159	-1.19	9.98	0.00286	-0.04	10.55	1	0.01
	THC0290_N_0450	757950	758024	-1	Region	indep	new TR			0.14	8.61	0.75368	2.09	9.58	0.00666	-0.14	8.7	0.41601	-0.14	8.23	0.51921	0.48	8.57	0.08723	0.93	10.97	0.15185	0.7	10.85	0.30752	1.46	11.23	0.29191	-0.48	8.52	0.14875	-0.35	8.59	0.22318	1.97	9.75	0.00736	-0.15	8.23	0.35649	0.03	8.32	1	-0.47
ppnK	THC0290_0622	758071	758955	-1	CDS		NAD(+) kinase	THC0290_v2_0668	ppnK	-0.23	9.92	0.15365	-0.55	9.77	0.01979	-0.19	10.03	0.37725	-0.89	9.66	0.01181	0.24	10.24	0.29093	-0.19	9.71	0.46034	-0.15	9.74	0.51391	-1.39	9.11	0.05283	0.1	10.17	0.73466	-0.07	10.09	0.84661	0.07	10.16	0.77757	-0.72	9.63	0.00659	0.09	10.03	1	0.13
	THC0290_N_0451	758956	759031	-1	Region	intra	new TR			-0.21	9.58	0.21333	-0.02	9.68	0.91622	-0.04	9.54	0.79546	-0.62	9.39	0.00699	-0.04	9.58	0.88079	0.53	10.09	0.16696	0.54	10.09	0.30138	0.82	10.24	0.13111	0.18	9.65	0.43919	0.01	9.57	0.98827	0.19	9.66	0.27739	-0.22	9.35	0.09174	0.07	9.49	1	-0.12
	THC0290_0623	759032	759691	-1	CDS		Protein of unknown function	THC0290_v2_0669		0.22	10.37	0.26304	0.36	10.44	0.08144	0.28	10.5	0.19688	-0.94	9.97	0.00218	0.17	10.56	0.38965	0	10.71	0.99113	0.1	10.77	0.71664	-0.18	10.63	0.50893	-0.4	10.16	0.22924	-0.4	10.16	0.18037	-0.01	10.36	0.97754	-0.15	10.24	0.27332	0.16	10.4	1	-0.09
	THC0290_N_0452	759692	759919	-1	Region	5prime	new TR			0.63	9.91	0.06358	1.37	10.28	0.00283	0.06	9.85	0.8563	-0.99	9.88	0.00529	0.28	10.13	0.27698	0.65	11.19	0.09088	1.76	11.74	0.02834	2.22	11.97	0.03602	-0.41	9.62	0.31396	-0.51	9.57	0.18813	-0.14	9.75	0.64817	0.26	10.04	0.07326	0.03	9.92	1	-0.05
pdxJ	THC0290_0624	760002	760730	1	CDS		Pyridoxal phosphate biosynthetic protein PdxJ	THC0290_v2_0670	pdxJ	0.53	10.39	0.0227	1.01	10.63	0.00398	0.3	10.28	0.08511	-0.12	10.27	0.43185	0.05	10.14	0.83264	0.09	10.88	0.77076	-0.41	10.63	0.1502	-0.84	10.41	0.10122	0.16	10.21	0.54024	0.1	10.18	0.67053	0.26	10.26	0.16294	-0.14	10.17	0.37374	-0.12	10.18	1	0.08
	THC0290_N_0453	760731	761017	1	Region	3prime	new TR			0.47	9.12	0.03716	1.47	9.62	0.00183	0.5	9.16	0.02889	0.5	9.19	0.01528	0.01	8.76	0.98714	0.02	10.72	0.94435	-0.33	10.55	0.27071	-0.31	10.56	0.33758	-0.05	8.89	0.85317	0.12	8.97	0.63686	0.61	9.22	0.03455	0.36	8.94	0.03113	0	8.76	1	-0.03
	THC0290_0625	760753	761388	-1	CDS		Putative ABC-type transport system, ATPase component	THC0290_v2_0671		0.35	7.69	0.08873	-0.2	7.42	0.25746	0.25	7.48	0.26853	-0.59	7.37	0.00992	0.06	7.87	0.77221	-0.32	7.2	0.4345	-0.94	6.89	0.18045	-0.35	7.18	0.6644	0.2	7.45	0.60508	0.37	7.54	0.19537	-0.11	7.3	0.67523	0.11	7.61	0.69603	0.05	7.57	1	0
	THC0290_N_0454	761018	761188	1	Region	3prime-PT	new TR			0.39	7.08	0.06771	0.35	7.06	0.05137	0.22	7.07	0.44297	1.33	6.84	0.03437	-0.11	6.67	0.82547	-1.46	6.37	0.48156	-1.09	6.55	0.57885	-1.75	6.22	0.33997	-0.4	6.76	0.39825	-0.21	6.85	0.59197	0.3	7.11	0.23175	0.29	6.95	0.20853	-0.13	6.74	1	-0.22
	THC0290_0626	761381	762274	-1	CDS		Putative ABC-type transport system, permease component	THC0290_v2_0672		0.05	7.48	0.73391	0.03	7.47	0.82592	0.41	7.36	0.05045	0.23	7.35	0.47446	0.2	7.8	0.31128	-0.02	7.19	0.96876	-0.49	6.96	0.61523	-1.33	6.53	0.54738	0.31	7.31	0.36762	0.16	7.23	0.60981	0.11	7.21	0.53031	0.26	7.42	0.09633	0.17	7.38	1	0.06
	THC0290_0627	762372	763148	1	CDS		Probable hydrolase	THC0290_v2_0673		0.11	9.91	0.3811	0.56	10.13	0.01918	0.08	9.86	0.57525	-0.14	9.57	0.26301	-0.02	9.6	0.95079	0.45	9.99	0.22792	0.48	10	0.27075	0.06	9.8	0.94152	0.29	9.97	0.24582	0.2	9.93	0.34856	-0.23	9.71	0.19393	0.2	9.81	0.24571	-0.08	9.67	1	-0.11
	THC0290_N_0455	763149	763266	1	Region	intra	new TR			0.57	11.17	0.02759	0.94	11.36	0.00639	0.36	11.25	0.23849	0.07	11.05	0.60156	0.18	11.12	0.50153	0.09	11.88	0.73444	0.64	12.15	0.11462	0.76	12.21	0.12402	0.01	11.08	0.97364	-0.01	11.07	0.98734	-0.28	10.94	0.36163	0.32	11.04	0.05076	-0.04	10.86	1	0.03
	THC0290_0628	763267	763611	1	CDS		Probable transmembrane protein of unknown function	THC0290_v2_0674		0.88	12.21	0.00541	0.57	12.05	0.0141	0.37	11.95	0.13095	0.16	11.96	0.16249	-0.07	12.01	0.71042	0.17	12.38	0.54473	0.59	12.6	0.07259	0.17	12.39	0.54671	0.19	11.86	0.56184	0.17	11.85	0.5602	-0.51	11.51	0.0978	0.24	11.76	0.14863	0.14	11.71	1	-0.06
	THC0290_N_0456	763612	763681	1	Region	3prime	new TR			0.36	10.04	0.11502	0.34	10.03	0.12259	-0.09	9.61	0.60152	1.2	9.82	0.00104	0.14	9.73	0.49612	0.09	10.45	0.87122	0.36	10.58	0.56757	0.83	10.81	0.36878	0.97	10.14	0.05259	0.92	10.11	0.04397	-0.1	9.6	0.6416	0.25	9.62	0.07937	0.03	9.51	1	-0.09
tig	THC0290_0629	763697	765022	1	CDS		Trigger factor (TF)	THC0290_v2_0675	tig	-1.59	13.49	0.00318	-1.88	13.34	0.00937	-0.23	14.08	0.27187	0.56	13.24	0.01246	0.12	13.72	0.68245	-0.1	12.69	0.69988	-0.37	12.55	0.23139	-0.91	12.29	0.07479	0.39	14.39	0.2266	0.31	14.35	0.26306	-0.24	14.08	0.39154	-0.55	14.02	0.02519	-0.16	14.21	1	0.11
	THC0290_N_0458	765050	765264	1	Region	5prime	new TR			0.37	12.18	0.38737	0.62	12.31	0.06997	-0.35	11.87	0.10703	-0.9	11.14	0.00422	0.04	11.87	0.83203	0.48	12.14	0.23794	0.01	11.9	0.98193	0.32	12.06	0.48441	0.62	12.35	0.09544	0.14	12.11	0.58377	-0.65	11.72	0.04599	0.46	11.76	0.02893	0.29	11.67	1	-0.42
clpP	THC0290_0630	765265	765966	1	CDS		S14 family, ATP-dependent Clp protease proteolytic subunit	THC0290_v2_0676	clpP	-0.05	13.46	0.7078	-0.39	13.29	0.05162	-0.25	13.37	0.1904	-0.61	13.1	0.00854	0.13	13.5	0.46027	-0.19	12.79	0.39594	-0.54	12.61	0.06296	-0.42	12.67	0.1919	0.46	13.73	0.16218	0.35	13.67	0.23971	-0.44	13.27	0.1624	-0.13	13.29	0.4302	-0.14	13.28	1	-0.01
	THC0290_N_0459	765967	766041	1	Region	intra	new TR			-0.27	11.35	0.36603	-0.31	11.33	0.16518	-0.25	11.4	0.51501	-0.56	10.64	0.03724	0.13	11.64	0.80549	-0.69	10.93	0.16061	-0.84	10.85	0.06073	-1.77	10.38	0.12452	0.76	11.9	0.17199	0.52	11.78	0.25902	-0.17	11.44	0.73154	0.24	11.42	0.30138	-0.02	11.29	1	0.17
clpX	THC0290_0631	766042	767274	1	CDS		S14 family, ATP-dependent Clp protease ATP-binding subunit	THC0290_v2_0677	clpX	-0.19	13.2	0.1835	-1.29	12.65	0.00283	-0.37	13.19	0.05884	-0.17	12.8	0.17251	0.08	13.23	0.64252	-0.56	11.61	0.17785	-0.72	11.53	0.04938	-1.17	11.31	0.05653	0.34	13.54	0.20443	0.28	13.51	0.25504	-0.66	13.04	0.02829	-0.17	12.91	0.15528	0.03	13.01	1	-0.01
	THC0290_N_0460	767146	767422	-1	Region	indep	new TR			1.73	6.06	0.02603	3.64	7.02	0.00187	0.01	5.34	0.97425	1.28	6.45	0.31909	-0.88	5.5	0.25847	1.22	7.58	0.25081	1.9	7.92	0.08824	3.55	8.75	0.07576	-0.32	5.18	0.20246	-0.33	5.17	0.36407	-0.85	4.91	0.01438	0.51	5.35	0.05995	0.02	5.1	1	-0.56
	THC0290_N_0461	767275	767487	1	Region	intra	new TR			0.21	11.23	0.38675	-0.21	11.02	0.44446	-0.23	11.11	0.32292	0.63	10.83	0.01248	0.07	10.89	0.68282	-0.25	10.08	0.6274	-0.6	9.9	0.40405	0.56	10.48	0.68041	0.31	11.38	0.35032	0.39	11.42	0.14378	-0.35	11.05	0.11413	-0.21	10.65	0.14345	-0.09	10.71	1	-0.28
	THC0290_0632	767506	767874	1	CDS		Putative Sec-independent protein translocase (twin-arginine translocation protein)	THC0290_v2_0678		-0.19	11.27	0.28816	0.3	11.52	0.41647	-0.31	11.35	0.18053	1.07	11.1	0.00121	0.08	10.99	0.65331	1.38	13.16	0.08303	2.71	13.82	0.02834	1.72	13.33	0.03864	0.14	11.57	0.6994	0.21	11.61	0.45618	-0.06	11.48	0.84288	-0.06	10.87	0.68368	0.03	10.91	1	-0.13
	THC0290_0633	767874	768443	1	CDS		Probable membrane-associated phospholipid phosphatase	THC0290_v2_0679		-0.61	10.13	0.04067	-0.56	10.16	0.04517	-0.51	10.59	0.07139	2.85	10.07	0.00055	0.09	9.76	0.75208	0.84	11.06	0.09462	0.53	10.91	0.07579	0.05	10.67	0.85795	-0.07	10.81	0.85527	0.2	10.95	0.56269	0.05	10.87	0.86706	-0.27	9.63	0.28808	0.01	9.77	1	-0.06
	THC0290_N_0462	768085	768500	-1	Region	3prime	new TR			1.04	7.07	0.0054	1.78	7.44	0.00113	0.89	7.15	0.01119	2.42	7.78	0.00597	-0.17	6.72	0.54889	0.9	8.25	0.20849	0.06	7.83	0.78684	0.5	8.05	0.44818	-0.38	6.51	0.17258	-0.7	6.35	0.0468	-0.1	6.65	0.55022	-0.12	6.77	0.54107	-0.23	6.71	1	-0.1
	THC0290_N_0463	768444	768788	1	Region	3prime	new TR			-1.11	8.67	0.01198	-1.2	8.62	0.02079	-0.89	9.29	0.01003	4.76	8.54	0.00053	-0.04	8.26	0.81761	1.27	9.31	0.10673	1.16	9.25	0.09532	-0.49	8.43	0.64567	0.01	9.74	0.98036	0.24	9.86	0.36735	-0.21	9.63	0.35938	-0.29	8.24	0.49765	-0.01	8.39	1	-0.28
	THC0290_0634	768501	769142	-1	CDS		O-methyltransferase	THC0290_v2_0680		0.69	9.5	0.01192	1.8	10.06	0.00171	0.61	9.35	0.02131	0.65	9.76	0.0648	-0.09	9.1	0.69443	0.32	10.21	0.32954	0.48	10.29	0.08127	0.52	10.32	0.16434	-0.02	9.04	0.94156	-0.06	9.02	0.84755	0.27	9.18	0.18684	0.36	9.32	0.06222	0.05	9.17	1	0.03
	THC0290_N_0464	768887	769220	1	Region	indep	new TR			-1.2	7.12	0.01761	-1.05	7.19	0.14573	-1.78	7.36	0.00822	5.08	8.46	0.00053	0.18	6.69	0.57433	0.29	7.97	0.60234	0.06	7.85	0.91665	-1.58	7.03	0.16379	0.5	8.51	0.5064	0.8	8.65	0.1142	-0.4	8.06	0.06365	-0.53	6.55	0.13075	-0.22	6.71	1	0.04
rlmN	THC0290_0635	769221	770264	1	CDS		Ribosomal RNA large subunit methyltransferase N	THC0290_v2_0681	rlmN	0.03	10.27	0.87461	1.25	10.88	0.00217	-0.14	10.32	0.31452	0.92	10.42	0.00698	-0.01	9.9	0.96076	-0.07	10.42	0.74702	-0.34	10.29	0.26209	-0.28	10.32	0.65536	0.22	10.5	0.38331	0.18	10.48	0.42428	-0.47	10.16	0.04428	0.44	10.33	0.0367	0.04	10.12	1	-0.07
	THC0290_N_0465	770297	771152	1	Region	intra	new TR			0.89	6.74	0.034	3.48	8.03	0.00085	0.46	6.36	0.08502	-0.7	6.9	0.02653	-0.32	5.68	0.58648	1.48	7.87	0.15976	1.78	8.02	0.15605	3.04	8.65	0.09685	1.11	6.69	0.08061	1.21	6.74	0.03619	0.12	6.19	0.62782	1.53	7.09	0.00826	0.54	6.59	1	-0.25
	THC0290_0636	770321	771202	-1	CDS		Probable lipoprotein precursor	THC0290_v2_0682		3.04	9.18	0.00158	5.15	10.24	0.00105	1.72	8.19	0.00822	-0.08	12.02	0.69202	-0.38	9.23	0.26448	-0.25	12.81	0.31115	0.89	13.38	0.03649	1.98	13.93	0.03738	-0.65	7.01	0.09599	-0.81	6.92	0.043	1.85	8.26	0.00575	0.71	8.7	0.00817	-0.1	8.29	1	0.09
	THC0290_0637	771307	772284	1	CDS		Polyprenyl synthetase	THC0290_v2_0683		0.19	9.73	0.30686	0.83	10.05	0.03686	-0.08	9.62	0.64929	-0.04	9.64	0.79453	-0.01	9.84	0.9661	1.07	10.42	0.10685	1.29	10.53	0.04742	1.11	10.44	0.08747	0.28	9.79	0.30451	0.26	9.79	0.28944	-0.07	9.62	0.72987	-0.44	9.62	0.01858	-0.05	9.81	1	0.1
	THC0290_0638	772469	773029	1	CDS		RNA polymerase ECF-type sigma factor	THC0290_v2_0684		0.66	7.65	0.00966	1.5	8.07	0.00178	-0.01	7.35	0.97631	2.44	9.16	0.00054	-0.42	7.42	0.10183	0.13	8.38	0.63038	-0.01	8.31	0.94911	1.64	9.14	0.03973	-0.1	7.31	0.76835	0.11	7.41	0.66958	0.1	7.41	0.57596	0.85	7.79	0.00764	0.28	7.51	1	0.25
	THC0290_0639	773016	773693	1	CDS		Probable transmembrane protein of unknown function, putative anti ECF-type sigma factor	THC0290_v2_0685		0.65	7.91	0.01186	0.96	8.07	0.07179	0.26	7.62	0.10392	2.18	9.35	0.00055	-0.41	7.66	0.15152	0.45	8.9	0.38322	0.45	8.91	0.43865	1.29	9.33	0.11551	0.34	7.66	0.20959	0.35	7.67	0.18603	-0.02	7.48	0.89708	0.66	7.89	0.00687	0.1	7.61	1	0.15
	THC0290_0640	773726	774790	1	CDS		Protein of unknown function precursor, putative sensor of anti-sigma and ECF sigma factor	THC0290_v2_0686		1.16	9.1	0.01437	0.51	8.78	0.03791	-0.05	8.53	0.78106	1.5	10.84	0.00067	-0.41	8.81	0.29693	0.08	9.41	0.74925	-0.87	8.94	0.08544	-0.07	9.34	0.88071	0.43	8.77	0.18505	0.44	8.78	0.13916	-0.32	8.4	0.41753	-0.1	8.54	0.56829	-0.04	8.57	1	0.13
	THC0290_0641	774935	776176	1	CDS		Protein of unknown function precursor	THC0290_v2_0687		-1.32	9.67	0.00425	-0.8	9.93	0.00741	-0.65	9.92	0.0532	1.39	10.01	0.0008	0.07	9.61	0.72252	0.77	9.76	0.14051	0.35	9.55	0.5614	0.3	9.52	0.72314	0.65	10.57	0.1186	0.91	10.7	0.06034	-0.74	9.88	0.07489	-0.7	9.4	0.0072	0.03	9.76	1	0.06
	THC0290_0642	776332	777606	1	CDS		Protein of unknown function precursor	THC0290_v2_0688		0.68	7.69	0.01198	2.51	8.61	0.00118	-0.27	7.2	0.2188	0.64	7.03	0.12887	-0.26	7.02	0.32861	1.51	10.95	0.12463	1.02	10.71	0.04075	-0.06	10.16	0.80943	0.93	7.8	0.06027	1.01	7.84	0.03619	-0.68	7	0.05783	0.01	7.34	0.97869	-0.01	7.34	1	-0.15
	THC0290_N_0466	777700	777762	1	Region	5prime	new TR			-1.49	7.99	0.00368	-0.63	8.42	0.0234	-1.22	8.46	0.01131	-1.04	7.54	0.11573	0.48	8.22	0.11733	1.18	7.74	0.15513	-3.2	5.55	0.02366	-3.27	5.51	0.02773	0.08	9.11	0.7749	0.08	9.1	0.80861	-0.08	9.02	0.7437	-0.19	8.27	0.16179	0.22	8.48	1	-0.02
dnaG	THC0290_0643	777763	779748	1	CDS		DNA primase	THC0290_v2_0689	dnaG	-1.46	9.1	0.00323	-0.97	9.35	0.00403	-0.94	9.45	0.01068	-0.48	9.09	0.04096	0.44	9.42	0.1314	0.17	8.17	0.48869	-0.04	8.07	0.94518	-0.05	8.06	0.97332	0.26	10.05	0.31507	0.18	10.01	0.42531	-0.03	9.91	0.88117	-0.52	9.28	0.0507	0.04	9.56	1	0.12
	THC0290_N_0467	779421	779788	-1	Region	3prime	new TR			2.97	7.64	0.00241	4.25	8.28	0.00078	1.34	6.87	0.00822	-0.71	6.79	0.12167	-0.53	6.62	0.23472	0.19	11.28	0.67645	-0.11	11.13	0.61353	0.02	11.2	0.95939	-0.23	6.08	0.63071	0.1	6.25	0.69787	0.91	6.65	0.01435	-0.35	6.07	0.11123	-0.5	5.99	1	-0.52
	THC0290_N_0468	779749	779897	1	Region	3prime	new TR			-0.98	7.41	0.14992	0.5	8.15	0.2303	-1.29	7.41	0.00839	-0.64	7.3	0.2202	0.15	7.08	0.79596	1.73	7.28	0.30834	1.44	7.13	0.104	3.05	7.94	0.03973	0.08	8.09	0.77452	0.01	8.06	0.9666	-0.22	7.94	0.24204	-0.41	7.11	0.03083	0.11	7.37	1	-0.29
	THC0290_0644	779789	780418	-1	CDS		Two-component system response regulatory protein, LuxR family	THC0290_v2_0690		3.34	9.71	0.00124	5.49	10.78	0.00078	1.71	8.95	0.00822	-2.57	8.85	0.00053	-0.47	8.97	0.26255	0.39	13.63	0.16307	0.33	13.6	0.27542	0.67	13.76	0.1453	-0.18	8	0.43919	0.01	8.1	0.97554	1.26	8.72	0.011	-0.09	8.5	0.49142	-0.15	8.47	1	0.03
	THC0290_N_0469	780456	780505	-1	Region	intra	new TR			-0.08	6.32	0.74154	-0.82	5.95	0.38819	-0.09	6.71	0.69627	-2.49	5.23	0.0007	0.38	6.6	0.47032	-1.51	4.61	0.09046	-1.51	4.61	0.05603	-1.51	4.61	0.07012	-0.77	6.37	0.12586	-0.53	6.49	0.23456	-1.16	6.17	0.04069	-1.29	6.11	0.01735	-0.53	6.49	1	0.66
nadE	THC0290_0645	780506	781312	-1	CDS		NH(3)-dependent NAD(+) synthetase	THC0290_v2_0691	nadE	-0.35	9.91	0.13377	-0.12	10.02	0.49402	-0.5	9.84	0.02873	-1.35	9.88	0.0008	0.04	10.05	0.86641	0.68	9.81	0.15115	0.81	9.88	0.04602	1.24	10.09	0.07328	-0.1	10.04	0.7627	-0.36	9.91	0.15131	-0.26	9.96	0.19408	-0.6	9.6	0.01127	0.04	9.92	1	0.08
	THC0290_N_0470	781374	781453	1	Region	5prime	new TR			0.57	9.46	0.28311	1.54	9.95	0.04264	-0.06	9.16	0.65505	-1.64	7.78	0.00971	-0.13	8.67	0.50931	1.05	11.2	0.09699	1.28	11.32	0.06904	1.06	11.21	0.11873	0.27	9.33	0.45845	0.11	9.25	0.63884	0.25	9.32	0.18321	0.26	9.09	0.22081	0.01	8.97	1	-0.42
gldB	THC0290_0646	781454	782410	1	CDS		Gliding motility lipoprotein precursor GldB	THC0290_v2_0692	gldB	0.05	10.57	0.73186	0.42	10.76	0.03678	-0.02	10.51	0.91009	-0.69	9.55	0.00556	-0.07	10.11	0.74579	0.18	11.5	0.51325	-0.23	11.3	0.32522	-0.52	11.15	0.31976	0.13	10.59	0.67046	0.09	10.57	0.76715	0.16	10.61	0.46752	-0.23	10.37	0.09274	-0.16	10.41	1	-0.16
	THC0290_N_0471	782411	782492	1	Region	intra	new TR			0.32	10.41	0.11525	0.71	10.61	0.01467	-0.08	10.54	0.7519	-0.79	9.88	0.00346	-0.06	10.14	0.79352	0.06	11.4	0.83071	-0.52	11.11	0.09304	-1.19	10.77	0.07538	0.03	10.6	0.92632	0	10.58	0.99802	0.07	10.62	0.80936	0.16	10.38	0.16667	-0.01	10.29	1	0.14
gldC	THC0290_0647	782493	782816	1	CDS		Gliding motility protein GldC	THC0290_v2_0693	gldC	0.33	11.03	0.18319	0.59	11.16	0.02163	-0.1	10.99	0.65803	-0.89	10.34	0.00335	-0.1	10.6	0.58903	0.14	11.83	0.50058	-0.47	11.52	0.0776	-0.5	11.51	0.15058	0.08	11.08	0.82045	0.12	11.1	0.74163	0.07	11.08	0.80235	0	10.73	0.99218	0.07	10.77	1	-0.11
	THC0290_N_0472	782817	782865	1	Region	3prime	new TR			-0.01	6.24	0.99417	0.73	6.61	0.0334	-0.58	6.28	0.129	-0.14	5.88	0.50947	-0.05	5.49	0.9389	0.91	7.59	0.1557	-1.7	6.29	0.04502	-0.03	7.12	0.99776	-0.63	6.25	0.28229	-0.31	6.42	0.37499	-0.43	6.36	0.26536	-0.88	5.47	0.1397	-0.46	5.68	1	1.01
engB	THC0290_0648	782935	783552	-1	CDS		Probable GTP-binding protein EngB	THC0290_v2_0694	engB	-0.26	10.32	0.2238	-0.08	10.41	0.57184	-0.36	10.41	0.05162	-0.18	9.58	0.1127	0.03	10.06	0.88493	-0.08	9.86	0.71147	-0.62	9.6	0.12824	-1.29	9.26	0.26769	0.26	10.72	0.37684	0.49	10.84	0.09511	-0.42	10.38	0.05606	-0.41	10.21	0.02163	-0.14	10.34	1	-0.04
	THC0290_N_0473	783553	783609	-1	Region	intra	new TR			-0.46	10.29	0.02634	0.06	10.55	0.64392	-0.15	10.44	0.36053	-0.33	9.63	0.08329	0.12	10.17	0.6476	-0.1	10.16	0.67829	-0.32	10.04	0.1567	-1.78	9.32	0.24443	0.15	10.59	0.53937	0.42	10.72	0.12417	-0.31	10.36	0.13759	-0.09	10.29	0.61421	0.04	10.35	1	0.1
pcbD	THC0290_0649	783610	784374	-1	CDS		Probable 2-hydroxy-6-oxo-6-phenylhexa-2,4-dienoic acid hydrolase	THC0290_v2_0695	pcbD	-0.24	10.42	0.34252	0.53	10.8	0.07226	-0.2	10.54	0.18888	0.08	9.87	0.64843	0.15	10.15	0.50296	0.37	10.73	0.20293	0.05	10.57	0.79551	0.2	10.64	0.47348	0.13	10.7	0.58665	0.29	10.78	0.27119	-0.31	10.48	0.12971	-0.05	10.44	0.71058	-0.08	10.43	1	-0.15
mraZ	THC0290_0650	784611	785084	1	CDS		Protein MraZ	THC0290_v2_0696	mraZ	0.04	11.2	0.88582	0.79	11.58	0.00639	-0.27	10.89	0.12509	0.42	11.78	0.02815	0	10.9	0.99835	0.14	11.54	0.55436	0.58	11.76	0.12087	1.85	12.39	0.07603	0.19	11.12	0.40603	0.02	11.03	0.96795	-0.14	10.95	0.4381	0.41	11.23	0.02072	0	11.03	1	0.28
mraW	THC0290_0651	785092	785967	1	CDS		S-adenosyl-methyltransferase MraW	THC0290_v2_0697	mraW	-0.06	11.07	0.81973	0.83	11.51	0.01079	-0.22	10.89	0.45536	0.73	11.43	0.00354	-0.03	10.67	0.91017	-0.01	11.53	0.98039	-0.44	11.32	0.14319	0.66	11.87	0.12195	0.24	11.12	0.45724	0.21	11.1	0.54009	-0.14	10.93	0.62762	0.27	10.97	0.07709	-0.07	10.8	1	0.18
	THC0290_0652	785967	786308	1	CDS		Probable transmembrane protein of unknown function	THC0290_v2_0698		-0.04	10.62	0.80043	0.74	11.01	0.00708	-0.51	10.2	0.03086	1.46	11.32	0.00119	0.06	10.08	0.79044	0.18	11.17	0.63035	-0.63	10.77	0.09777	-0.38	10.89	0.30252	0.25	10.58	0.32371	0.25	10.58	0.30884	-0.09	10.41	0.60113	0.48	10.43	0.02385	-0.11	10.14	1	0.16
ftsI	THC0290_0653	786299	788302	1	CDS		Peptidoglycan glycosyltransferase FtsI	THC0290_v2_0699	ftsI	0.3	10.75	0.09579	0.79	11	0.00814	-0.53	10.58	0.02507	2.08	11.75	0.00055	0.17	10.29	0.44097	0.01	11.25	0.96481	-0.54	10.97	0.07322	-1.18	10.65	0.10893	-0.03	10.83	0.91012	-0.13	10.78	0.58612	0.04	10.87	0.80293	0.74	10.7	0.0154	0.11	10.38	1	0.17
murE	THC0290_0654	788304	789764	1	CDS		UDP-N-acetylmuramoylalanyl-D-glutamate--2,6-diaminopimelate ligase	THC0290_v2_0700	murE	-0.11	11.27	0.52979	0.01	11.33	0.96277	-0.4	11.07	0.0757	1.22	11.87	0.00104	0.01	11.12	0.95079	-0.22	10.92	0.38031	-0.75	10.65	0.04978	-1.41	10.32	0.07807	0.03	11.28	0.92095	0.03	11.28	0.90959	-0.06	11.24	0.76844	0.2	11.24	0.14938	0	11.14	1	0.21
	THC0290_N_0474	789765	789827	1	Region	intra	new TR			-0.15	7.28	0.43153	0.42	7.57	0.42178	-0.44	7.24	0.08752	2.06	7.69	0.00067	0.18	6.88	0.36672	-2.01	6.53	0.33809	-3.58	5.75	0.02366	-3.65	5.71	0.02773	-0.22	7.35	0.46213	-0.08	7.41	0.78436	-0.01	7.45	0.97849	0.36	7.23	0.0351	-0.12	6.99	1	0.05
mraY	THC0290_0655	789828	791057	1	CDS		Phospho-N-acetylmuramoyl-pentapeptide-transferase	THC0290_v2_0701	mraY	0.01	11.54	0.98869	0.17	11.62	0.32857	-0.17	11.19	0.22834	0.86	12.11	0.00306	-0.11	11.13	0.58976	-0.61	11.02	0.10327	-0.6	11.02	0.08868	-0.98	10.83	0.05527	0.26	11.4	0.30451	0.17	11.36	0.41761	0.09	11.32	0.54566	0.34	11.38	0.06616	0.05	11.24	1	0.15
	THC0290_N_0475	790755	790883	-1	Region	indep	new TR			2.49	5.11	0.10097	4.54	6.14	0.01211	0.77	4.46	0.04149	1.6	6	0.09761	0.06	4.24	0.92468	3.19	8.09	0.13056	3.53	8.26	0.10268	4.23	8.61	0.08326	-0.02	4.07	0.97306	-0.2	3.98	0.50917	-0.09	4.03	0.73443	0.11	4.47	0.65295	-0.37	4.24	1	-1.31
murD	THC0290_0656	791059	792390	1	CDS		UDP-N-acetylmuramoylalanine--D-glutamate ligase	THC0290_v2_0702	murD	0.05	11.76	0.77205	-0.41	11.53	0.04164	-0.41	11.45	0.0427	0.41	12.2	0.02107	0.01	11.37	0.95662	-0.49	10.75	0.12567	-0.72	10.64	0.04938	-1.19	10.4	0.07564	0.42	11.87	0.13413	0.49	11.9	0.08261	-0.34	11.49	0.09205	-0.11	11.48	0.33751	-0.04	11.52	1	0.24
	THC0290_N_0476	792391	792468	1	Region	intra	new TR			0.29	13.05	0.18224	-0.28	12.77	0.15291	-0.37	12.98	0.05071	0.32	12.84	0.09559	-0.23	12.82	0.31323	-0.5	11.67	0.38662	-0.43	11.7	0.14351	-0.63	11.61	0.23372	0.48	13.4	0.11516	0.3	13.31	0.2063	-0.45	12.93	0.08367	-0.34	12.72	0.14994	-0.03	12.88	1	0.45
ftsW	THC0290_0657	792469	793755	1	CDS		Cell division protein FtsW	THC0290_v2_0703	ftsW	-0.26	11.53	0.13005	-0.14	11.59	0.37018	-0.65	11.24	0.01437	0.86	11.77	0.00219	0.1	11.27	0.6001	-0.57	10.86	0.10171	-0.51	10.88	0.10118	0.16	11.22	0.55704	0.51	11.82	0.11279	0.56	11.84	0.06788	-0.21	11.46	0.23048	0.06	11.32	0.56149	-0.05	11.26	1	0.19
murG	THC0290_0658	793797	794900	1	CDS		Undecaprenyldiphospho-muramoylpentapeptide beta-N-acetylglucosaminyltransferase	THC0290_v2_0704	murG	-0.49	10.42	0.07683	-0.66	10.33	0.01299	-0.43	10.32	0.04553	1.73	10.61	0.00056	0.17	10.22	0.36607	-0.54	9.53	0.10429	-0.89	9.35	0.04118	-1.22	9.18	0.05152	0.09	10.58	0.74501	0.16	10.62	0.49147	-0.13	10.47	0.4114	0.15	10.37	0.25041	-0.09	10.24	1	0.23
	THC0290_N_0478	794901	794953	1	Region	intra	new TR			-0.04	12.07	0.7739	-0.28	11.94	0.44828	-0.23	11.94	0.35118	0.96	11.74	0.01367	0.17	11.89	0.60025	-0.72	10.61	0.26008	-0.67	10.64	0.28149	-0.62	10.66	0.48847	-0.06	12.02	0.78902	0.02	12.07	0.93937	-0.1	12	0.64083	-0.08	11.83	0.60955	0.27	12	1	0.09
murC	THC0290_0659	794954	796300	1	CDS		UDP-N-acetylmuramate--L-alanine ligase	THC0290_v2_0705	murC	-0.13	11.28	0.59856	-0.2	11.24	0.29126	-0.47	11.07	0.06846	0.93	11.69	0.00196	0.07	11.2	0.70598	-0.85	10.09	0.11007	-0.62	10.2	0.05237	-0.41	10.31	0.19214	0.02	11.31	0.95991	-0.01	11.3	0.97346	-0.21	11.2	0.40185	0.43	11.42	0.02248	-0.03	11.19	1	0.2
ftsQ	THC0290_0660	796290	797012	1	CDS		Cell division protein FtsQ	THC0290_v2_0706	ftsQ	0.04	11.6	0.82115	0	11.58	0.9825	-0.54	11.56	0.02729	0.85	11.67	0.00391	0.23	11.36	0.34446	-0.38	11.02	0.26945	-0.46	10.98	0.10145	0.24	11.33	0.4561	-0.45	11.6	0.15377	-0.4	11.63	0.12912	-0.17	11.74	0.38427	0.48	11.53	0.02463	0.06	11.32	1	-0.07
ftsA	THC0290_0661	797014	798414	1	CDS		Cell division protein FtsA	THC0290_v2_0707	ftsA	-0.04	13.04	0.8498	-0.49	12.81	0.02714	-0.46	12.95	0.04741	0.41	12.71	0.03066	0.09	12.66	0.60983	-0.31	11.81	0.36572	-0.35	11.78	0.12372	-0.44	11.74	0.17672	-0.19	13.09	0.56621	-0.33	13.02	0.20195	-0.28	13.05	0.1948	0.22	12.74	0.13815	0.02	12.64	1	-0.05
ftsZ	THC0290_0662	798461	800443	1	CDS		Cell division protein FtsZ	THC0290_v2_0708	ftsZ	-0.17	13.49	0.36616	-0.92	13.11	0.00527	-0.45	13.35	0.17112	-0.88	13.33	0.00281	0.35	13.31	0.14178	-1.03	11.81	0.14547	-0.4	12.12	0.15089	-1	11.82	0.07048	0.11	13.63	0.79479	-0.05	13.55	0.91121	-0.14	13.5	0.74498	-0.2	13.27	0.1599	-0.07	13.34	1	0.01
	THC0290_N_0480	800444	800556	1	Region	intra	new TR			-0.31	10.44	0.46325	-0.13	10.53	0.58187	-0.67	10.31	0.06594	-1.15	10.74	0.02349	0.34	10.13	0.33094	0.17	10.29	0.61133	0.89	10.65	0.14101	0.55	10.49	0.31976	0.04	10.66	0.94071	0.13	10.71	0.76623	-0.02	10.63	0.95695	-0.16	10.23	0.43244	-0.18	10.22	1	-0.07
	THC0290_N_0481	800558	800772	1	Region	5prime	new TR			0.11	11.14	0.81458	0.29	11.23	0.12437	-0.81	10.86	0.0589	-1.08	10.1	0.00431	0.24	10.68	0.29693	0.34	11.01	0.3336	0.18	10.93	0.64217	0.4	11.04	0.43215	0.19	11.36	0.67082	-0.28	11.13	0.47909	-0.41	11.06	0.28789	0.18	10.72	0.25971	0.18	10.72	1	-0.41
	THC0290_0663	800773	801222	1	CDS		Protein of unknown function	THC0290_v2_0709		-0.02	13.92	0.96131	-0.66	13.6	0.0085	-0.51	13.83	0.04698	-0.92	13.46	0.0099	0.2	13.9	0.35701	-0.22	12.9	0.73025	-0.26	12.88	0.21993	-0.43	12.79	0.31284	0.27	14.22	0.37336	0.22	14.2	0.42394	-0.28	13.95	0.36607	-0.53	13.64	0.01063	-0.12	13.85	1	0.05
	THC0290_N_0482	801223	801292	1	Region	intra	new TR			-0.06	7.88	0.81058	0.32	8.07	0.08245	-0.23	7.88	0.39238	-2.36	5.07	0.00053	-0.22	7.71	0.36476	-0.59	7.68	0.50804	-0.43	7.76	0.41873	-2.06	6.94	0.41295	0.54	8.27	0.27736	0.12	8.06	0.76005	-0.05	7.98	0.92167	-0.18	7.56	0.64757	-0.13	7.59	1	-0.2
	THC0290_tRNA_0013	801293	801366	1	tRNA		transfer RNA-Arg			0.22	9.42	0.14601	0.67	9.64	0.05473	-0.58	9.27	0.06422	0.83	9.26	0.01161	0.19	8.71	0.40785	0.52	9.43	0.12053	0.92	9.62	0.0622	2.26	10.29	0.03738	-0.26	9.43	0.43646	-0.5	9.31	0.15131	-0.34	9.38	0.21908	0.4	8.91	0.13756	0.13	8.77	1	-0.21
	THC0290_0664	801393	802211	1	CDS		Probable transmembrane protein of unknown function	THC0290_v2_0710		-0.21	8.96	0.46514	-1.18	8.48	0.00653	-0.79	9	0.05344	1.93	8.88	0.00167	0.18	8.39	0.36607	-0.45	7.72	0.27975	-1.89	7	0.35566	-3.13	6.38	0.0738	-0.6	9.1	0.23227	-0.37	9.22	0.43104	-0.46	9.17	0.2062	0.17	8.42	0.19611	-0.04	8.31	1	-0.13
	THC0290_N_0483	801868	802199	-1	Region	3prime	new TR			-0.5	7.73	0.03809	-1.57	7.2	0.00194	-0.22	7.97	0.32772	4.75	8.04	0.00053	-0.11	7.46	0.69615	2.12	6.55	0.08303	0	5.5	0.99897	-0.35	5.32	0.80641	-0.06	8.05	0.86465	0.18	8.16	0.57877	-0.11	8.02	0.64188	-0.68	7.8	0.04397	-0.06	8.11	1	-0.22
rpe	THC0290_0665	802200	802859	-1	CDS		Ribulose-phosphate 3-epimerase	THC0290_v2_0711	rpe	-0.19	11.63	0.42725	0.1	11.77	0.52829	-0.45	11.36	0.3456	1.34	12.66	0.00567	0.01	11.59	0.98924	0.57	11.43	0.14855	0.81	11.55	0.06272	0.45	11.37	0.23397	0.35	11.76	0.53946	0.35	11.76	0.52539	-0.45	11.36	0.42623	-0.52	11.96	0.03579	0.04	12.25	1	-0.02
	THC0290_N_0484	802212	803155	1	Region	3prime	new TR			0.28	7.13	0.18559	0.74	7.36	0.02794	-0.16	7.08	0.36709	1.53	7.89	0.00329	-0.03	6.81	0.9526	0.13	7.23	0.66268	-0.22	7.06	0.60237	-0.21	7.06	0.56169	-0.08	7.12	0.85392	-0.18	7.07	0.55361	0.02	7.17	0.9189	0.33	6.47	0.27088	-0.07	6.26	1	0.08
	THC0290_N_0485	803148	803240	-1	Region	3prime	new TR			-0.5	8.66	0.25465	1.17	9.5	0.01496	-1.48	8.42	0.00932	5.32	11.83	0.00053	0.07	8.09	0.83264	0.55	9.47	0.43573	-0.87	8.76	0.29957	2.31	10.35	0.03738	1.17	9.74	0.05163	1.17	9.74	0.0374	0.15	9.24	0.5057	0.02	8.71	0.93703	-0.05	8.68	1	-0.26
	THC0290_N_0486	803241	803318	-1	Region	indep	new TR			0.88	9.95	0.06085	2.91	10.96	0.00291	-0.1	9.97	0.64914	3.03	11.83	0.00067	-0.25	10.1	0.24769	0.25	12.22	0.80925	0.32	12.26	0.50916	1.36	12.78	0.46734	0.58	10.32	0.14833	0.6	10.33	0.13029	0.39	10.22	0.17306	0.31	10.26	0.13008	-0.16	10.03	1	-0.23
rpoD	THC0290_0666	803319	804182	-1	CDS		RNA polymerase sigma-70 factor RpoD	THC0290_v2_0713	rpoD	0.21	12.36	0.15521	0.86	12.69	0.00951	-0.23	12.17	0.1626	2.15	14.21	0.00085	-0.09	12.15	0.61287	-0.12	13.24	0.70558	-0.35	13.13	0.22159	0.28	13.44	0.4795	0.34	12.45	0.18809	0.4	12.48	0.13724	0.07	12.32	0.67765	0.19	12.3	0.14564	0.02	12.22	1	0.14
	THC0290_0667	804310	804894	1	CDS		Protein of unknown function	THC0290_v2_0714		-0.36	8.7	0.14848	0.51	9.14	0.0459	-0.57	8.62	0.07107	0.11	9	0.75007	0.06	8.9	0.75883	0.62	10.12	0.23335	0.88	10.24	0.04179	0.82	10.22	0.07012	-0.58	8.61	0.14032	-0.74	8.53	0.07923	0.01	8.91	0.97679	-0.34	8.39	0.03097	0.07	8.6	1	-0.11
	THC0290_N_0487	804893	804980	-1	Region	3prime	new TR			-0.54	5.39	0.15218	2.35	6.84	0.00937	0.69	5.42	0.15186	-1.09	4.57	0.04321	-0.33	4.65	0.32361	-0.34	5.82	0.8812	0.19	6.09	0.89988	0.38	6.19	0.89242	0.7	5.42	0.32979	-0.03	5.06	0.96342	-0.57	4.79	0.29156	1.06	5.58	0.03806	0.32	5.21	1	0.01
pnp	THC0290_0668	804981	807116	-1	CDS		Polyribonucleotide nucleotidyltransferase	THC0290_v2_0715	pnp	-1.16	12.69	0.00579	-0.45	13.04	0.11947	-0.5	12.78	0.12845	0.37	11.21	0.01921	-0.26	12.23	0.48883	-0.78	11.24	0.09046	-0.81	11.22	0.04742	-0.9	11.18	0.07603	0.72	13.39	0.11913	0.79	13.42	0.09788	-0.3	12.88	0.39402	0.25	13.31	0.09212	-0.02	13.18	1	0.03
	THC0290_N_0489	807117	807316	-1	Region	intra	new TR			-0.41	13.54	0.17275	0.9	14.2	0.01	-0.19	13.69	0.47655	0.13	11.95	0.36386	-0.41	13.12	0.25052	-0.51	13.15	0.16631	-0.62	13.09	0.06038	-0.35	13.22	0.35873	0.57	14.08	0.16218	0.64	14.11	0.11909	-0.29	13.64	0.34207	0.27	14.13	0.11587	0.04	14.01	1	-0.02
rpsO	THC0290_0669	807346	807612	-1	CDS		30S ribosomal protein S15	THC0290_v2_0716	rpsO	-0.04	13.89	0.9452	0.47	14.14	0.23256	-0.38	14.04	0.06414	0.03	13.28	0.83187	0.27	13.71	0.31114	0.82	14.29	0.3461	0.13	13.94	0.85332	0.34	14.04	0.70236	0.05	14.26	0.86867	0.19	14.32	0.51255	-1.02	13.72	0.02267	-0.32	13.82	0.33123	0.16	14.06	1	-0.39
	THC0290_0670	807710	809137	-1	CDS		Probable nucleoside-diphosphate-sugar epimerase	THC0290_v2_0717		1.02	9.76	0.00776	1.71	10.11	0.00345	0.89	9.39	0.02945	-0.47	10.43	0.02109	-0.04	9.81	0.9064	-0.54	11.23	0.11743	-0.47	11.27	0.07975	-0.4	11.3	0.34012	0.05	8.97	0.9167	-0.27	8.81	0.41993	0.64	9.27	0.07227	1.05	9.7	0.00373	0.12	9.23	1	0.09
phrB3	THC0290_0671	809155	810447	-1	CDS		Deoxyribodipyrimidine photolyase PhrB3	THC0290_v2_0718	phrB3	-0.06	8.25	0.82068	1.86	9.21	0.00178	0.35	8.29	0.10445	0.78	8.49	0.02573	0.17	7.88	0.40897	-1.19	10.4	0.08417	-0.73	10.63	0.09643	-0.26	10.86	0.47791	0.2	8.22	0.47169	0.03	8.13	0.93709	0.59	8.42	0.04468	0.55	8.4	0.01083	0.05	8.15	1	-0.02
	THC0290_0672	810444	812006	-1	CDS		Protein of unknown function related to deoxyribodipyrimidine photolyase	THC0290_v2_0719		-0.35	8.35	0.06563	1.78	9.42	0.00837	0.24	8.46	0.23797	0.73	9	0.01927	0.15	7.99	0.46367	-1.02	11.05	0.08385	-0.78	11.17	0.04712	-0.73	11.2	0.1327	0.23	8.46	0.45174	-0.21	8.24	0.42622	0.45	8.57	0.13191	0.42	8.5	0.01835	0	8.29	1	0.16
	THC0290_N_0492	812007	812083	-1	Region	intra	new TR			-0.3	9.4	0.0754	1.72	10.41	0.00135	-0.14	9.41	0.64007	0.65	9.69	0.02129	-0.09	9	0.84915	-0.09	11.85	0.73981	0.55	12.17	0.3241	1.17	12.48	0.23505	0.41	9.68	0.30413	-0.08	9.44	0.8531	0.13	9.54	0.77188	0.48	9.38	0.0258	0.1	9.19	1	0.05
phrB2	THC0290_0673	812084	813592	-1	CDS		Deoxyribodipyrimidine photolyase PhrB2	THC0290_v2_0720	phrB2	-0.42	8.62	0.03908	2.12	9.89	0.00275	0.09	8.93	0.71547	0.37	9.32	0.09015	0.02	8.32	0.94555	-0.54	11.53	0.10474	-0.61	11.5	0.06427	-0.47	11.57	0.15801	0.26	9.01	0.47169	-0.21	8.78	0.50011	0.35	9.06	0.2615	0.1	8.8	0.43451	-0.12	8.69	1	0.19
	THC0290_0674	813604	814233	-1	CDS		Protein of unknown function	THC0290_v2_0721		-0.5	8.89	0.03737	1.83	10.05	0.00417	0.11	9.18	0.53516	0.26	9.74	0.24696	0.07	8.48	0.71042	-0.2	12.35	0.37049	-0.41	12.24	0.10173	-0.82	12.04	0.07069	0.41	9.33	0.28162	-0.18	9.03	0.45491	0.37	9.31	0.15928	-0.04	8.98	0.84235	-0.15	8.93	1	0.08
	THC0290_0675	814274	814693	-1	CDS		Protein of unknown function	THC0290_v2_0722		-0.33	9.08	0.06422	1.69	10.09	0.00415	0.07	9.3	0.68407	0.31	9.92	0.08254	-0.03	8.66	0.8747	-0.09	12.96	0.73769	0.17	13.1	0.5714	-0.15	12.93	0.62835	0.62	9.57	0.09023	-0.07	9.23	0.82177	0.46	9.5	0.08922	0.01	8.92	0.91343	0.04	8.94	1	0.05
	THC0290_0676	814714	815004	-1	CDS		Protein of unknown function	THC0290_v2_0723		-0.47	9.26	0.14859	2.1	10.54	0.0037	0.17	9.59	0.49549	-0.08	9.88	0.62897	0.05	9.07	0.91309	0.34	13.09	0.2984	0.6	13.22	0.07502	0.59	13.22	0.15129	0.56	9.79	0.12577	0.12	9.56	0.65862	0.49	9.75	0.10229	0.25	9.3	0.16945	0.18	9.26	1	0.08
	THC0290_0677	815144	815599	-1	CDS		Protein of unknown function	THC0290_v2_0724		0.36	11.77	0.04478	0.45	11.82	0.03013	0.41	11.96	0.0993	-0.93	10.93	0.002	-0.23	11.64	0.30259	-0.07	12.48	0.80549	-0.48	12.28	0.12767	-0.37	12.33	0.33168	-0.06	11.72	0.83549	-0.18	11.66	0.5101	0.19	11.84	0.42036	0.28	11.7	0.0729	0.11	11.61	1	-0.01
	THC0290_0678	815673	816212	1	CDS		Probable transmembrane protein of unknown function	THC0290_v2_0725		0.49	7.64	0.15742	1.25	8.02	0.0029	0.27	7.51	0.50385	0.29	6.8	0.0364	-0.23	7.33	0.60025	0.98	8.38	0.08318	1	8.39	0.03718	1.3	8.54	0.04388	-0.39	7.17	0.43111	-0.16	7.29	0.75394	0.08	7.41	0.87604	0.85	7.58	0.00453	0.24	7.28	1	-0.14
	THC0290_0679	816190	816630	1	CDS		Probable transmembrane protein of unknown function	THC0290_v2_0726		0.79	7.06	0.03809	0.83	7.08	0.02139	0.46	6.93	0.05351	0.31	6	0.08296	-0.18	6.66	0.38483	-1.07	6.14	0.38774	-1.95	5.7	0.04441	0	6.68	1	-0.21	6.6	0.48552	-0.26	6.58	0.28157	0.24	6.82	0.21679	1.01	7.31	0.0042	0.06	6.83	1	-0.33
	THC0290_0680	816720	817085	1	CDS		Protein of unknown function	THC0290_v2_0727		1.26	9.25	0.00344	2.31	9.78	0.00096	0.58	9.17	0.06568	0.07	8.2	0.65697	-0.13	8.76	0.48207	0.53	12.3	0.12398	0.42	12.24	0.10465	0.06	12.06	0.89027	0.18	8.97	0.58115	0.1	8.93	0.7924	0.97	9.36	0.0355	1.44	9.32	0.00286	0.21	8.71	1	-0.21
	THC0290_N_0495	817086	817137	1	Region	intra	new TR			2.22	8.92	0.00619	3.92	9.77	0.00127	1.51	8.7	0.00839	0.55	6.23	0.21709	-0.88	8.44	0.07702	-0.21	11.9	0.7125	-0.07	11.97	0.89656	-0.14	11.93	0.6524	1.01	8.44	0.06553	1.25	8.57	0.03187	0.98	8.43	0.02462	0.09	8.65	0.5672	0.01	8.61	1	0.29
	THC0290_0681	817138	819144	1	CDS		Probable TonB-dependent outer membrane receptor precursor	THC0290_v2_0728		2.4	11.13	0.00279	3.77	11.82	0.00078	1.72	10.53	0.00865	1.09	9.05	0.00127	-1.65	10.3	0.04484	-0.4	13.4	0.45422	-0.15	13.52	0.68727	0.09	13.64	0.82468	1.59	10.46	0.0316	1.6	10.47	0.02521	1.24	10.29	0.015	0.17	10.8	0.20001	0.02	10.72	1	0.11
	THC0290_0682	819184	819525	1	CDS		Protein of unknown function	THC0290_v2_0729		2.36	11.05	0.00302	3.53	11.64	0.00097	1.38	10.43	0.01745	1.17	10.68	0.00158	-1.18	10.51	0.04025	-0.34	13.37	0.29854	-0.39	13.34	0.12767	0.14	13.61	0.61843	1.21	10.34	0.04882	1.2	10.34	0.0374	1.75	10.61	0.01118	0.17	10.51	0.35589	0.06	10.46	1	-0.33
	THC0290_0683	819616	819906	1	CDS		Hypothetical protein	THC0290_v2_0730		1.19	12.57	0.00482	1.92	12.94	0.00107	0.4	12.33	0.13256	0.86	11.55	0.00309	-0.38	12.16	0.13904	0.28	14.02	0.30707	-0.1	13.83	0.73578	0.25	14	0.63011	0.13	12.2	0.64712	-0.01	12.13	0.98676	0.72	12.49	0.04468	0.61	12.56	0.0255	0.24	12.38	1	-0.38
	THC0290_N_0497	819907	819970	1	Region	intra	new TR			0.92	10.62	0.04721	2.35	11.34	0.00356	0.46	10.1	0.14711	2.4	9.23	0.00055	-0.28	10.34	0.58243	-0.99	12.79	0.08417	-0.62	12.98	0.10118	-1.1	12.74	0.06504	0.75	10.24	0.06576	0.79	10.26	0.04707	0.83	10.28	0.02486	-0.03	10.37	0.84309	0.15	10.46	1	-0.05
sulP	THC0290_0684	819971	821572	1	CDS		Probable sulfate permease	THC0290_v2_0731	sulP	1.15	12.85	0.00441	2.28	13.42	0.00399	0.74	11.97	0.09937	2.77	10.75	0.00055	-0.33	12.8	0.46627	-1.4	14.34	0.08303	-0.66	14.72	0.05558	-1.25	14.42	0.10172	1.3	12.25	0.03704	1.11	12.15	0.04547	0.35	11.77	0.23179	-0.46	12.36	0.13108	0.13	12.66	1	-0.31
cynT	THC0290_0685	821595	822230	1	CDS		Carbonic anhydrase	THC0290_v2_0732	cynT	1.03	13.09	0.00626	2.28	13.71	0.00146	0.62	12.26	0.16801	1.27	11.26	0.00245	-0.37	12.95	0.42376	-0.74	14.2	0.13027	-0.13	14.5	0.46165	-0.49	14.32	0.31015	1.14	12.52	0.03839	0.99	12.44	0.07312	0.41	12.15	0.1913	-0.49	12.32	0.04954	0.18	12.65	1	-0.35
	THC0290_N_0498	822231	822315	1	Region	3prime	new TR			0.1	9.82	0.65754	1.57	10.56	0.0042	0.01	9.25	0.97771	0.98	8.39	0.00391	-0.06	9.52	0.9389	-0.2	11.66	0.8342	0.7	12.11	0.39259	1.15	12.33	0.24798	1.21	9.85	0.05035	1.14	9.82	0.07471	0.55	9.52	0.07634	-0.17	9.21	0.491	0.33	9.46	1	0
	THC0290_0686	822316	823008	1	CDS		Transmembrane protein of unknown function, DedA family	THC0290_v2_0733		0.07	11	0.69112	0.96	11.44	0.004	-0.25	10.66	0.42453	0.99	9.97	0.00224	-0.08	10.95	0.7872	-0.61	11.94	0.10745	-0.15	12.17	0.39259	-0.56	11.97	0.12198	0.83	11.2	0.07026	0.96	11.26	0.057	0.53	11.05	0.18116	-0.25	10.75	0.26584	0.11	10.93	1	-0.18
	THC0290_0687	823039	823653	-1	CDS		Protein of unknown function	THC0290_v2_0734		-0.28	8.71	0.11418	-0.59	8.56	0.02265	-0.12	8.77	0.42146	-0.3	9.24	0.34795	0.37	8.79	0.13215	0.46	9.9	0.13093	-0.2	9.57	0.28066	-0.59	9.37	0.19905	-0.3	8.67	0.23012	-0.41	8.62	0.12118	0.21	8.93	0.24537	-0.26	8.17	0.14404	0.03	8.32	1	0.01
	THC0290_0688	823730	824341	-1	CDS		Probable hydrolase (HAD superfamily)	THC0290_v2_0735		0.02	10.19	0.88871	0.23	10.3	0.13946	-0.17	9.95	0.26595	-1.36	10.39	0.00097	0.17	10.09	0.50193	0.52	10.93	0.10868	0.47	10.9	0.08926	0.77	11.05	0.11677	-0.02	10.02	0.93234	-0.15	9.96	0.54029	0.15	10.11	0.38483	-0.02	9.63	0.88868	0.09	9.69	1	-0.14
ribD	THC0290_0689	824334	825341	-1	CDS		Riboflavin biosynthesis protein RibD	THC0290_v2_0736	ribD	-0.55	9.63	0.02421	-0.01	9.91	0.97348	-0.46	9.79	0.03038	-0.72	8.98	0.00805	0.17	9.58	0.44405	0.5	9.51	0.19836	0.63	9.57	0.19399	1.2	9.86	0.0761	-0.16	9.94	0.51299	-0.26	9.88	0.26805	-0.55	9.74	0.03474	0.11	9.75	0.33781	-0.07	9.65	1	-0.04
yjgM	THC0290_0690	825397	825891	1	CDS		Probable acetyltransferase YjgM	THC0290_v2_0737	yjgM	-0.43	8.94	0.04958	0.21	9.26	0.22646	-0.29	8.87	0.21452	-2.19	7.99	0.00055	0.41	9.18	0.1139	0.73	9.57	0.11345	0.75	9.58	0.04986	0.89	9.65	0.05988	0.16	9.09	0.61102	0.22	9.12	0.45193	-0.46	8.79	0.11836	-0.14	8.91	0.24859	-0.02	8.97	1	0
hemK	THC0290_0691	825894	826751	1	CDS		Methylase of polypeptide chain release factors	THC0290_v2_0738	hemK	-0.42	8.71	0.05769	-0.12	8.85	0.46611	-0.32	8.69	0.07736	-1.81	7.96	0.00055	0.25	8.94	0.23159	0.3	8.64	0.52749	-0.46	8.26	0.17941	-0.53	8.22	0.15251	0.32	9.01	0.20266	0.18	8.94	0.45046	-0.24	8.74	0.18455	-0.08	8.66	0.52857	-0.03	8.69	1	0.2
	THC0290_N_0500	826538	826787	-1	Region	3prime	new TR			-0.54	7.76	0.05877	-0.46	7.81	0.15246	-0.41	7.83	0.13452	3.77	8.64	0.0006	-0.42	7.39	0.34894	0.85	6.88	0.39407	1.81	7.36	0.10848	1.85	7.38	0.23874	-0.62	7.72	0.12766	-0.04	8.01	0.90255	-0.42	7.83	0.14359	0.55	7.96	0.03164	-0.23	7.57	1	-0.23
	THC0290_0692	826788	828029	-1	CDS		Probable ABC-type transport system, permease component	THC0290_v2_0739		0.5	9.43	0.01849	1.3	9.83	0.00796	-0.42	9.16	0.05185	2.24	10.28	0.00055	-0.52	8.99	0.08702	0.51	10.4	0.12614	1.45	10.87	0.02861	3.93	12.11	0.03011	-0.35	9.2	0.19037	-0.12	9.31	0.614	-0.15	9.3	0.42243	0.8	9.55	0.00496	-0.07	9.11	1	-0.09
	THC0290_N_0501	828254	828326	1	Region	5prime	new TR			0.87	13.12	0.02109	1.09	13.23	0.00345	0.16	13	0.38488	0.24	12.51	0.36666	-0.03	12.98	0.95754	0.69	13.83	0.23639	0.95	13.96	0.05445	0.81	13.89	0.10893	-0.15	12.85	0.57477	-0.57	12.63	0.1016	-0.44	12.7	0.06819	0.64	13.25	0.02139	0.04	12.95	1	-0.17
hisS	THC0290_0693	828327	829745	1	CDS		Histidine--tRNA ligase	THC0290_v2_0740	hisS	0.59	10.99	0.01222	0.98	11.18	0.00913	0.23	10.91	0.14794	0.92	11.19	0.00168	0.13	10.78	0.51538	0.01	11.38	0.96577	-0.05	11.35	0.89338	-0.09	11.33	0.82586	0.1	10.84	0.69967	0	10.79	0.99208	0.01	10.8	0.97029	0.38	10.94	0.02973	0.01	10.75	1	0.22
	THC0290_N_0502	829692	829841	-1	Region	3prime	new TR			0.28	4.68	0.75321	0.63	4.86	0.59834	-0.59	4.98	0.25307	0.83	4.43	0.24915	-0.23	4.27	0.38707	0.07	3.89	0.73389	1.19	4.45	0.21469	3.16	5.43	0.40521	-0.85	4.85	0.26349	-1.14	4.71	0.10546	-0.89	4.83	0.21605	-0.34	4.44	0.36431	-0.75	4.24	0.88261	-1.07
	THC0290_N_0503	829746	830044	1	Region	3prime	new TR			-0.1	7.89	0.56727	-0.26	7.81	0.39326	0.19	7.91	0.19003	1.8	8.24	0.00584	-0.02	7.63	0.93075	0.58	7.74	0.14647	-1.97	6.47	0.23101	-3.48	5.71	0.02773	0.27	7.95	0.26493	0.18	7.9	0.39779	-0.13	7.75	0.55319	-0.08	7.83	0.49135	-0.09	7.83	1	0.25
xerD	THC0290_0694	829842	830741	-1	CDS		Tyrosine recombinase XerD	THC0290_v2_0741	xerD	-0.06	9.31	0.71608	0.77	9.73	0.01081	-0.12	9.31	0.41948	0.65	9.3	0.02228	0.12	9.17	0.58072	0.57	9.79	0.10331	0.56	9.78	0.062	-0.12	9.44	0.84836	-0.2	9.27	0.41643	-0.19	9.27	0.56768	-0.04	9.35	0.8062	0.25	9.55	0.12472	-0.06	9.4	1	-0.09
	THC0290_N_0504	830742	830830	-1	Region	3prime	new TR			-0.31	4.06	0.35169	-0.37	4.04	0.27313	-0.13	3.97	0.40933	0.04	3.91	0.71303	0.14	4.19	0.67454	0.05	3.88	0.82708	0.02	3.86	0.91385	0.03	3.87	0.92477	0.7	4.38	0.10532	0.63	4.35	0.14977	-0.16	3.95	0.37828	-0.23	4.11	0.08868	0.02	4.24	1	-0.57
fspA	THC0290_0695	830831	831442	-1	CDS		Flavobacterial-specific protein antigen FspA precursor	THC0290_v2_0742	fspA	0.23	15.18	0.23147	-1.93	14.1	0.00187	0.14	15.16	0.40073	-1.38	14.66	0.0008	-0.22	15.64	0.37073	-0.87	11.2	0.20861	-0.93	11.16	0.1425	-0.47	11.4	0.61198	-0.03	15.07	0.91012	-0.05	15.06	0.85763	-1.81	14.18	0.01237	-0.12	15.26	0.53988	0.13	15.38	1	-0.16
aroQ	THC0290_0696	831952	832365	1	CDS		3-dehydroquinate dehydratase	THC0290_v2_0743	aroQ	0.47	9.61	0.08522	0.5	9.62	0.03956	-0.02	9.4	0.93678	-1.24	9.71	0.00167	0.31	9.98	0.15818	1.01	10.38	0.08318	1.22	10.49	0.04015	1.47	10.62	0.03973	-0.23	9.3	0.53106	0.04	9.44	0.91188	0.75	9.79	0.07489	-0.47	9.44	0.02492	-0.07	9.64	1	-0.19
	THC0290_N_0505	832366	832716	1	Region	intra	new TR			0.1	9.62	0.48132	-0.18	9.49	0.22788	-0.12	9.59	0.5566	0.33	10.14	0.27011	0.12	9.96	0.5808	0.21	9.87	0.47477	-0.52	9.51	0.30223	0.38	9.95	0.25353	-0.08	9.61	0.80469	0.11	9.71	0.7121	0.53	9.92	0.09697	-0.45	9.6	0.02387	-0.15	9.76	1	-0.09
	THC0290_0697	832717	835182	1	CDS		Putative outer membrane protein precursor	THC0290_v2_0745		-0.78	7.55	0.00909	-1.73	7.08	0.00169	-0.3	7.76	0.08165	-0.26	7.21	0.47445	0.18	7.98	0.35852	0.42	7.19	0.33092	0.78	7.37	0.16085	1.59	7.78	0.05219	-0.14	7.84	0.62687	-0.25	7.78	0.32119	0.39	8.1	0.08579	-0.73	7.36	0.01462	0.01	7.73	1	0.19
	THC0290_0698	835488	836156	1	CDS		Protein of unknown function	THC0290_v2_0746		0.34	10.85	0.05071	0.05	10.7	0.70239	0.34	10.83	0.07726	-0.62	10.73	0.00698	0.17	10.96	0.41643	0.18	10.38	0.43471	0.14	10.36	0.52527	0.33	10.45	0.31917	-0.03	10.64	0.9167	-0.19	10.57	0.47665	0.26	10.79	0.19704	-0.16	10.64	0.34067	-0.05	10.7	1	-0.05
	THC0290_N_0506	836157	836330	1	Region	intra	new TR			-0.18	11.71	0.44701	-0.93	11.33	0.00514	0.36	11.72	0.07326	-0.58	11.26	0.00548	0.18	11.85	0.33656	-0.42	10.59	0.35508	-0.78	10.42	0.08063	-1.04	10.29	0.25082	-0.17	11.46	0.59002	-0.37	11.35	0.251	0.22	11.65	0.27639	-0.3	11.36	0.18424	0.11	11.56	1	0.03
	THC0290_0699	836331	837218	1	CDS		Probable membrane-bound lytic murein transglycosylase precursor	THC0290_v2_0747		0.04	10.52	0.82074	-0.43	10.29	0.03922	0.2	10.51	0.24634	0.05	10.63	0.64611	0.06	10.68	0.80142	-0.19	9.8	0.51179	-0.64	9.58	0.06296	-1.27	9.27	0.14157	-0.06	10.38	0.82722	-0.13	10.34	0.56606	0.27	10.54	0.18157	-0.2	10.35	0.17677	-0.03	10.43	1	0.02
	THC0290_N_0507	837219	837332	1	Region	3prime	new TR			0.94	8.41	0.14461	1.29	8.59	0.0067	0.24	8.16	0.55483	0.64	8.83	0.00704	0.23	8.31	0.3379	0.44	8.85	0.31419	-0.09	8.59	0.93639	0.07	8.67	0.85433	-0.4	7.84	0.40318	0.22	8.15	0.63929	0.56	8.32	0.28436	0.03	8.1	0.85977	0.04	8.11	1	-0.02
	THC0290_N_0508	837284	837554	-1	Region	3prime	new TR			0.83	10.22	0.06191	1.05	10.33	0.03107	0.18	10.01	0.39054	0.76	10.85	0.00636	0.27	10.33	0.25125	0.27	10.76	0.59665	-0.31	10.47	0.52006	-0.4	10.42	0.58663	0.08	9.96	0.80469	0.21	10.03	0.4893	0.24	10.04	0.33299	0.01	10.14	0.97199	0.07	10.18	1	-0.24
murA	THC0290_0700	837555	838862	-1	CDS		UDP-N-acetylglucosamine 1-carboxyvinyltransferase	THC0290_v2_0748	murA	0.17	12.23	0.28531	0.29	12.29	0.2186	0.4	12.19	0.04817	0.1	12.18	0.35519	-0.11	12.08	0.54103	-0.51	11.68	0.12567	-0.76	11.56	0.04733	-0.69	11.59	0.09609	0.22	12.1	0.34379	0.2	12.09	0.42916	0	11.99	0.99601	0.26	12.06	0.1036	0.14	11.99	1	0.07
	THC0290_N_0509	838863	838941	-1	Region	intra	new TR			-0.21	12.68	0.241	-0.13	12.72	0.48526	0.19	12.56	0.23975	0.25	12.6	0.06978	-0.06	12.46	0.75029	-0.1	12.07	0.72047	-0.4	11.92	0.16417	-0.1	12.07	0.77059	0.3	12.61	0.24582	0.09	12.51	0.7122	-0.16	12.38	0.37339	0.35	12.54	0.03985	0.08	12.41	1	0.06
	THC0290_0701	838942	839658	-1	CDS		Protein of unknown function	THC0290_v2_0749		0.15	12.59	0.36264	0.28	12.65	0.16009	0.18	12.63	0.24629	0	12.52	0.96335	-0.05	12.6	0.83367	-0.34	12.3	0.1939	-0.69	12.12	0.04935	-0.7	12.12	0.08816	0.06	12.57	0.81446	0.12	12.6	0.62338	-0.27	12.4	0.16074	0.36	12.73	0.03768	-0.16	12.47	1	-0.03
	THC0290_0702	839661	839945	-1	CDS		Hypothetical protein	THC0290_v2_0750		0.04	11.5	0.94018	0.93	11.94	0.00849	-0.21	11.2	0.31239	-0.19	11.33	0.31649	0	11.1	0.98924	0.65	12.15	0.14431	1.07	12.36	0.03498	1.69	12.67	0.03936	0.17	11.39	0.57505	0.04	11.33	0.8918	-0.34	11.13	0.16759	0.6	11.45	0.01127	-0.04	11.13	1	-0.37
	THC0290_N_0510	840044	840245	-1	Region	indep	new TR			-0.69	8.18	0.0246	0.24	8.64	0.19188	-1.3	8.19	0.00822	2.01	9.41	0.00198	0.27	8.31	0.38707	-0.06	7.92	0.95527	1.1	8.5	0.04258	1.96	8.93	0.03602	0.23	8.96	0.45499	0.19	8.94	0.5101	1.64	9.66	0.00873	-0.34	8.28	0.09119	0.33	8.61	1	0.18
	THC0290_0703	840392	840925	1	CDS		Protein of unknown function	THC0290_v2_0751		-1.45	10.22	0.00488	-0.66	10.62	0.18844	-0.94	10.73	0.0094	0.96	9.27	0.00281	0.16	9.97	0.52426	0.51	9.67	0.14051	0.09	9.46	0.61804	0.48	9.65	0.1504	-0.19	11.11	0.41588	0.05	11.23	0.90346	-0.91	10.75	0.01911	-0.76	10.35	0.00853	0.08	10.77	1	-0.17
recQ2	THC0290_0704	840970	842862	1	CDS		ATP-dependent DNA helicase RecQ2	THC0290_v2_0752	recQ2	-1.54	9.38	0.00424	-2.02	9.14	0.00161	-0.7	9.75	0.02847	-0.38	8.97	0.06552	0.25	9.45	0.32598	-0.13	8.28	0.76871	-1.1	7.8	0.30522	-1.36	7.67	0.24472	-0.11	10.04	0.73466	-0.08	10.06	0.81914	-0.54	9.83	0.04677	-0.33	9.44	0.03463	0.03	9.62	1	0.08
	THC0290_N_0512	842863	842945	1	Region	intra	new TR			-0.58	11.58	0.02419	-0.52	11.61	0.08393	-0.3	11.92	0.26813	-0.51	11.42	0.02101	0.42	11.71	0.15987	0.21	11.25	0.43597	0.06	11.18	0.8266	0.34	11.32	0.28512	-0.4	11.87	0.28025	-0.26	11.94	0.47456	-0.46	11.84	0.16809	-0.28	11.7	0.06222	-0.17	11.76	1	0.09
fmt	THC0290_0705	842946	843896	1	CDS		Methionyl-tRNA formyltransferase	THC0290_v2_0753	fmt	-0.95	10.09	0.00747	-0.81	10.16	0.00813	-0.32	10.31	0.06704	-0.39	9.8	0.01595	0.11	10.23	0.53092	-0.15	9.63	0.55305	-0.41	9.5	0.13225	-0.21	9.6	0.59747	0.11	10.52	0.63291	0.08	10.51	0.71713	-0.35	10.29	0.11704	-0.26	10.08	0.06255	0.03	10.22	1	0.04
	THC0290_N_0513	843897	844024	1	Region	intra	new TR			-1.08	10	0.01085	-0.95	10.06	0.01879	-0.32	10.22	0.06706	-0.32	9.31	0.06652	0.25	9.97	0.26385	-0.07	9.53	0.86914	-0.74	9.2	0.07581	0.41	9.77	0.43961	0.21	10.49	0.35032	0.27	10.52	0.25586	-0.26	10.25	0.19881	0.06	9.94	0.65505	0.18	10.01	1	0.26
hupB	THC0290_0706	844064	844339	1	CDS		Histone-like bacterial DNA-binding protein HU-beta	THC0290_v2_0754	hupB	0.33	14.89	0.06252	-1.16	14.14	0.00289	0.08	14.69	0.59897	-1.33	14.36	0.00099	0	15.2	0.99835	0.29	13.62	0.41525	0.34	13.65	0.32665	-0.12	13.42	0.75221	-0.15	14.57	0.53598	-0.18	14.56	0.41471	0	14.65	1	-0.11	14.62	0.41681	0.2	14.77	1	-0.01
	THC0290_0707	844456	845016	1	CDS		Putative transcriptional regulator	THC0290_v2_0755		1.26	11.62	0.00371	1.97	11.97	0.00134	0.5	11.32	0.15093	-0.82	12.41	0.00374	0.01	11.89	0.99008	0.89	13.22	0.10745	1.59	13.57	0.02834	1.73	13.64	0.03963	-0.31	10.91	0.52371	-0.3	10.92	0.41727	0.45	11.29	0.21117	0.71	11.91	0.01208	-0.09	11.51	1	0.05
	THC0290_N_0516	844739	845012	-1	Region	3prime	new TR			-0.28	6.89	0.2901	0.82	7.44	0.11114	-0.66	7.11	0.01539	1.78	7.52	0.00056	0.16	6.46	0.60833	1.42	7.56	0.1557	1.67	7.69	0.23667	2.08	7.89	0.12245	0.04	7.46	0.93383	0.05	7.46	0.91492	-0.77	7.06	0.05703	-0.52	6.28	0.37849	0.3	6.69	1	-0.1
	THC0290_0708	845013	845807	-1	CDS		Branched-chain amino acid aminotransferase/4-amino-4-deoxychorismate lyase family protein	THC0290_v2_0756		-0.48	11.33	0.0217	-0.68	11.22	0.0658	-0.4	11.51	0.11732	-0.77	10.69	0.00306	0.19	11.49	0.36373	0.36	10.51	0.17616	-0.17	10.25	0.3694	-0.22	10.22	0.48965	-0.11	11.65	0.69737	-0.06	11.67	0.83071	-0.69	11.36	0.03492	-0.82	10.9	0.00895	0.01	11.31	1	-0.07
	THC0290_N_0517	845017	845453	1	Region	3prime	new TR			1.69	6.94	0.00262	2.68	7.43	0.00086	0.63	6.55	0.16305	2.25	9.2	0.00072	0.01	6.55	0.99169	1.46	9.75	0.08303	1.1	9.57	0.03576	-0.84	8.6	0.0753	-1.1	5.69	0.1016	-1.32	5.58	0.07477	0.84	6.66	0.136	2.04	7.36	0.00678	-0.14	6.27	1	0.21
	THC0290_0709	845862	846254	-1	CDS		Protein of unknown function	THC0290_v2_0757		0.32	11.78	0.2265	0.03	11.63	0.86769	-0.34	11.49	0.16958	-2.06	11.3	0.00068	0.1	12.01	0.6114	0.73	11.31	0.09046	0.31	11.1	0.38499	0.45	11.17	0.31516	-0.14	11.6	0.69967	0.07	11.7	0.82914	-0.55	11.39	0.10694	-0.69	11.37	0.03065	0.09	11.76	1	-0.19
	THC0290_tRNA_0014	846398	846474	1	tRNA		transfer RNA-Met			1.44	10.8	0.28542	3.35	11.75	0.00802	-0.29	10.27	0.36518	1.28	11.21	0.02409	0.22	10.1	0.58975	2.01	12.92	0.23699	2.51	13.17	0.08061	3.32	13.58	0.03973	-0.61	10.11	0.28576	-0.24	10.3	0.60022	-0.4	10.22	0.32161	0.07	10.82	0.77114	-0.21	10.68	1	-1.16
	THC0290_N_0519	846486	846777	-1	Region	3prime	new TR			-0.51	11.84	0.02073	-2.06	11.06	0.00104	-0.03	12.23	0.90393	-2.01	11.09	0.00062	0.11	12.38	0.7052	-0.21	9.51	0.53365	-0.15	9.54	0.80718	-0.56	9.34	0.67359	-0.22	12.13	0.49188	-0.27	12.11	0.36925	-0.28	12.1	0.30957	-0.92	12.13	0.00441	0.01	12.6	1	0.11
	THC0290_N_0520	846502	846820	1	Region	3prime-PT	new TR			-0.46	6.86	0.25489	0.91	7.54	0.03702	-1.03	7.06	0.01705	1.69	6.67	0.00466	-0.2	6.37	0.70313	0.73	8.39	0.32918	0.19	8.12	0.72266	-0.52	7.76	0.50584	0.44	7.8	0.37681	0.78	7.96	0.06984	-0.89	7.13	0.08016	-0.27	6.74	0.69041	0.17	6.96	1	-0.21
ribH	THC0290_0710	846778	847347	-1	CDS		Riboflavin synthase, beta subunit	THC0290_v2_0759	ribH	-1.08	12	0.00627	-2.39	11.34	0.00103	-0.46	12.16	0.04217	-1.64	10.42	0.0008	0	12.19	0.99835	-0.46	9.25	0.15115	-0.05	9.46	0.84257	0.34	9.65	0.26631	0.01	12.39	0.97692	0.01	12.39	0.98811	-0.54	12.12	0.04669	-1.01	11.78	0.0041	0.15	12.36	1	0.03
	THC0290_N_0521	847348	847417	-1	Region	intra	new TR			-1.54	10.44	0.00351	-1.74	10.35	0.01021	-0.77	10.98	0.02139	-1.88	8.12	0.02594	0.41	10.95	0.27329	-0.08	8.25	0.92221	-2.19	7.2	0.40656	-1.2	7.7	0.6448	-0.11	11.3	0.70431	0.19	11.45	0.53153	-0.45	11.13	0.14817	-1.66	10.47	0.00245	-0.14	11.24	1	-0.21
	THC0290_0711	847418	848209	-1	CDS		Protein of unknown function	THC0290_v2_0760		-1.43	12.9	0.00339	-2.61	12.3	0.00102	-0.74	13.29	0.0146	-0.96	11.43	0.00416	0.16	13.34	0.46945	-0.26	10.39	0.48352	0.31	10.68	0.32912	0.31	10.68	0.58179	0.06	13.69	0.8173	0.15	13.74	0.5602	-0.47	13.43	0.05624	-1.71	12.78	0.00286	-0.03	13.62	1	0.05
recF	THC0290_0712	848495	849574	1	CDS		DNA replication and repair protein RecF	THC0290_v2_0761	recF	-0.82	8.44	0.01125	-1.33	8.19	0.00426	-0.19	8.53	0.18686	0.05	8.18	0.70104	0.14	8.62	0.48207	0.26	7.98	0.33809	0.21	7.95	0.27659	0.42	8.06	0.19486	0.53	8.89	0.09024	0.44	8.85	0.12258	0	8.63	0.98617	-0.22	8.5	0.17399	-0.15	8.53	1	0.08
	THC0290_0713	849601	850293	1	CDS		Thioredoxin family protein precursor	THC0290_v2_0762		1.33	11.86	0.0033	0.49	11.44	0.02462	0.89	11.51	0.01391	-0.48	11.73	0.01773	-0.09	12.01	0.65064	0.38	11.76	0.17022	0.3	11.73	0.31219	0.51	11.83	0.21478	0	11.07	0.99335	-0.14	11	0.58196	0.66	11.4	0.04036	0.15	11.48	0.33781	-0.01	11.4	1	-0.08
	THC0290_0714	850295	850969	1	CDS		Protein of unknown function	THC0290_v2_0763		0.98	12.03	0.00868	-0.12	11.48	0.44991	0.8	11.76	0.01187	0	11.96	0.98191	0.03	12.25	0.92548	-0.02	11.24	0.95831	-0.32	11.09	0.1634	-0.58	10.96	0.31983	-0.2	11.26	0.43719	-0.16	11.28	0.47865	0.52	11.62	0.03469	0.1	11.73	0.41336	0	11.68	1	0.12
remC	THC0290_0715	850979	852040	1	CDS		RemC, Candidate alpha-glycosyltransferase, Glycosyltransferase family 4	THC0290_v2_0764	remC	0.51	11.54	0.0552	-1.6	10.49	0.00188	0.47	11.33	0.10143	0.65	11.51	0.00373	0.16	11.87	0.4531	-0.32	9.98	0.20361	-0.47	9.9	0.16588	-0.68	9.8	0.08984	-0.36	10.92	0.28336	-0.27	10.97	0.39016	0.43	11.31	0.1633	0.09	11.34	0.49275	0.06	11.33	1	0.25
asnB	THC0290_0716	852044	853891	1	CDS		Asparagine synthetase [glutamine-hydrolyzing]	THC0290_v2_0765	asnB	0.74	10.77	0.00849	-0.96	9.93	0.0089	0.42	10.53	0.06562	0.41	10.63	0.02599	0.13	11	0.46461	-1.05	8.82	0.10064	-1.11	8.79	0.23773	-1.1	8.8	0.07714	-0.33	10.15	0.24343	-0.3	10.16	0.24721	0.41	10.52	0.0974	0.25	10.65	0.14714	0	10.52	1	0.1
	THC0290_N_0522	853892	854019	1	Region	intra	new TR			1.36	10.17	0.07275	0.52	9.75	0.22742	0.56	9.73	0.0343	0.24	10.25	0.09877	0.14	10.08	0.55825	0.31	8.91	0.77113	0.73	9.13	0.40697	0.46	8.99	0.80619	-0.33	9.28	0.21894	-0.18	9.36	0.4442	0.46	9.68	0.09887	0.05	9.73	0.70099	0.25	9.83	1	-0.44
	THC0290_N_0523	854021	854077	1	Region	5prime	new TR			-0.04	10.4	0.87614	-0.37	10.23	0.22115	-0.19	10.39	0.23837	-1.1	10.06	0.00227	0.21	10.4	0.31114	0.66	9.66	0.2324	0.77	9.71	0.31747	0.89	9.77	0.36562	-0.24	10.36	0.33715	-0.23	10.36	0.32657	0.1	10.53	0.57002	-0.39	10.13	0.02617	0.05	10.35	1	-0.23
murB	THC0290_0717	854078	855091	1	CDS		UDP-N-acetylmuramate dehydrogenase	THC0290_v2_0766	murB	-0.28	10.65	0.08049	-1.17	10.2	0.00258	-0.12	10.7	0.3732	-0.88	10.31	0.00188	0.22	10.67	0.29648	0.22	9.51	0.48989	0.55	9.68	0.12285	1.01	9.91	0.0753	-0.23	10.65	0.42295	-0.3	10.61	0.18857	0.13	10.83	0.43251	-0.44	10.37	0.01686	0.05	10.61	1	0.19
	THC0290_0718	855109	855891	1	CDS		Probable ABC-type iron(III)-transport system, ATPase component	THC0290_v2_0767		-0.43	9.44	0.07417	-2.44	8.44	0.00144	-0.29	9.77	0.14968	0.05	8.84	0.67205	0.3	9.61	0.21502	0.64	7.17	0.10006	-0.16	6.77	0.93497	1.08	7.39	0.06984	-1.01	9.41	0.04705	-0.92	9.46	0.07866	-0.02	9.9	0.93516	-1.03	9.17	0.01682	-0.08	9.65	1	0.11
	THC0290_N_0524	855197	855910	-1	Region	3prime	new TR			-0.25	7.18	0.15869	0	7.3	0.98694	-0.46	7.19	0.08525	0.13	6.8	0.55551	-0.09	6.75	0.83105	-0.34	7.14	0.56005	0.46	7.54	0.23183	0.46	7.54	0.58961	0.09	7.47	0.70047	0.2	7.52	0.34026	-0.34	7.25	0.09434	-0.25	6.68	0.3318	-0.13	6.74	1	-0.24
	THC0290_0719	855911	856366	-1	CDS		Probable rRNA methyltransferase	THC0290_v2_0768		-0.87	8.37	0.01131	-0.6	8.51	0.07171	-0.78	8.47	0.02534	-1.16	7.29	0.00197	0.05	8.15	0.81614	0.56	8.55	0.4819	0.41	8.47	0.65459	1.12	8.83	0.21946	0.28	9	0.34965	0.41	9.06	0.18117	-0.47	8.62	0.14608	-0.59	8.05	0.01363	0.07	8.38	1	-0.03
	THC0290_0720	856373	856993	-1	CDS		Pseudouridylate synthase	THC0290_v2_0769		-1.1	7.9	0.00412	-0.63	8.14	0.01463	-0.85	8.09	0.01801	-1.77	6.33	0.00233	0.23	7.72	0.31184	0.28	7.54	0.41	-0.4	7.2	0.29957	0.58	7.69	0.42908	0.34	8.68	0.26879	0.51	8.76	0.12198	-0.76	8.13	0.03635	-0.48	7.87	0.02819	-0.13	8.04	1	0.02
rmuC	THC0290_0721	857058	858404	1	CDS		DNA recombination protein RmuC	THC0290_v2_0770	rmuC	0.09	9.64	0.52513	0.23	9.71	0.36576	-0.16	9.53	0.29406	-2.23	8.61	0.00428	0.06	9.66	0.74356	0.62	10.17	0.14855	1.05	10.38	0.03891	1.07	10.39	0.0595	0.06	9.64	0.82045	-0.03	9.6	0.92125	0.11	9.67	0.5084	-0.09	9.57	0.55278	0	9.62	1	-0.13
	THC0290_0722	858412	858780	1	CDS		Protein of unknown function precursor	THC0290_v2_0771		0.13	10.86	0.34232	0.08	10.83	0.56601	-0.33	10.66	0.05884	-1.72	10.04	0.00089	0.01	10.86	0.97109	0.28	10.69	0.28035	0.57	10.83	0.47915	1.4	11.25	0.32778	0.05	10.85	0.84918	-0.1	10.78	0.70284	-0.04	10.81	0.82744	-0.18	10.67	0.53988	0.03	10.77	1	-0.16
	THC0290_0723	858781	859326	1	CDS		Acyl-CoA hydrolase family protein	THC0290_v2_0772		0.01	9.1	0.97183	-0.57	8.81	0.05944	-0.27	8.91	0.20507	-1.55	8.78	0.00092	0.1	8.99	0.6125	-0.39	8.32	0.21909	-0.73	8.15	0.56877	0.1	8.57	0.84757	-0.12	8.99	0.69265	0.08	9.08	0.82607	0.22	9.16	0.3724	0.07	8.84	0.53246	-0.01	8.8	1	0.14
	THC0290_N_0525	859327	859592	1	Region	3prime	new TR			-0.27	7.55	0.12041	-1.59	6.89	0.00932	-0.44	7.44	0.06448	0.14	6.92	0.83075	-0.04	7.29	0.92822	-1.92	5.12	0.08303	-1.19	5.49	0.11001	-0.31	5.93	0.76813	-0.43	7.45	0.18215	-0.51	7.41	0.09962	-0.03	7.64	0.87613	0.05	7.13	0.70099	-0.06	7.08	1	0
irk	THC0290_0724	859337	860293	-1	CDS		Inward rectifier potassium channel Irk	THC0290_v2_0773	irk	0.31	8.34	0.06361	1.66	9.01	0.00249	-0.11	8.04	0.47828	-2.05	7.34	0.00055	-0.05	8.21	0.79732	0.8	9.3	0.10192	0.99	9.4	0.03674	1.67	9.74	0.05531	0.17	8.18	0.49255	-0.05	8.07	0.86623	-0.15	8.02	0.39345	0.8	8.51	0.00583	0.09	8.16	1	0.01
carB	THC0290_0725	860354	863206	-1	CDS		Carbamoyl-phosphate synthase large subunit	THC0290_v2_0774	carB	-1.16	10.34	0.00441	0.05	10.94	0.74573	-0.66	10.46	0.14328	1.7	9.62	0.00148	-0.08	10.13	0.79381	-0.08	9.98	0.71693	-0.47	9.79	0.1172	-0.34	9.85	0.31049	0.95	11.26	0.12416	0.86	11.22	0.12126	-0.74	10.42	0.20434	-0.04	11.46	0.83516	0.1	11.53	1	0.1
	THC0290_N_0526	863207	863394	-1	Region	intra	new TR			-1.04	10.11	0.01428	0.43	10.84	0.07352	-0.93	10.35	0.0178	2.1	9.02	0.00105	-0.13	9.72	0.73884	0.36	10.16	0.20361	-0.14	9.91	0.48957	0.45	10.2	0.19002	0.8	11.21	0.06763	0.77	11.2	0.06202	-0.93	10.35	0.02429	-0.38	10.98	0.02463	0.09	11.21	1	-0.11
rpmH	THC0290_0726	863440	863601	-1	CDS		50S ribosomal protein L34	THC0290_v2_0775	rpmH	-1.06	11.99	0.13736	-0.56	12.24	0.28211	-1.48	12.39	0.01372	0.43	10.75	0.09043	0.42	11.76	0.40225	1.01	12.32	0.1188	1.1	12.37	0.08038	0.92	12.28	0.29334	-0.26	13	0.3174	0.08	13.18	0.87035	-1.72	12.28	0.01557	-1.49	11.77	0.03579	0.34	12.68	1	-0.35
	THC0290_N_0528	863602	863656	-1	Region	5prime	new TR			-0.82	10.75	0.26542	0.3	11.31	0.70724	-1.62	11	0.01196	0.21	9.64	0.51315	0.38	10.54	0.34042	1.03	11.75	0.23563	0.89	11.68	0.20121	0.96	11.71	0.47317	-0.44	11.59	0.14032	0.08	11.85	0.89424	-2.16	10.73	0.00842	-1.47	10.59	0.03489	0.25	11.45	1	-0.58
	THC0290_0727	863756	864271	1	CDS		Probable transmembrane protein of unknown function	THC0290_v2_0776		-1.39	10.4	0.00339	-0.4	10.89	0.03735	-0.71	10.85	0.03086	0.15	9.58	0.2574	-0.02	10.59	0.94555	0.39	10.61	0.30091	0.03	10.43	0.91636	0.23	10.53	0.43702	0.29	11.34	0.35032	0.23	11.31	0.46307	-0.44	10.98	0.136	-0.49	10.66	0.01984	0.14	10.98	1	-0.14
	THC0290_N_0529	864272	864411	1	Region	3prime	new TR			-1.43	7.35	0.00543	-0.12	8	0.68866	-0.68	7.75	0.0642	0.68	6.72	0.21815	0.19	7.48	0.53972	0.33	8.04	0.63047	1.04	8.4	0.20378	-0.07	7.84	0.94175	0.05	8.11	0.88824	0.28	8.23	0.47909	-0.13	8.03	0.70334	-0.32	7.67	0.22081	0.17	7.92	1	-0.07
groL	THC0290_0728	864839	866467	-1	CDS		60 kDa chaperonin GroEL	THC0290_v2_0778	groL	-1.71	13.54	0.0041	-1.96	13.41	0.00109	-0.19	14.2	0.34388	0.28	13.56	0.04542	0.02	13.81	0.93986	-1.19	14.24	0.09201	-0.79	14.44	0.16502	-2.15	13.76	0.0385	0.2	14.39	0.47006	0.18	14.38	0.50482	-0.37	14.11	0.13554	0.57	14.31	0.0237	0	14.03	1	-0.11
	THC0290_N_0530	866468	866905	-1	Region	intra	new TR			-1.49	13.73	0.00695	-2.3	13.32	0.00175	0.13	14.49	0.48053	0.09	12.54	0.43726	-0.29	13.96	0.25188	-1.17	14.28	0.08417	-0.99	14.37	0.12463	-1.61	14.06	0.0412	0.22	14.53	0.44421	-0.06	14.4	0.85457	-0.5	14.18	0.08498	0.66	14.46	0.06805	-0.06	14.1	1	-0.05
groS	THC0290_0729	866906	867181	-1	CDS		10 kDa chaperonin GroES	THC0290_v2_0780	groS	-1.42	13.11	0.00353	-1.83	12.91	0.00723	-0.15	13.82	0.29643	0.07	12.37	0.70527	-0.1	13.22	0.67039	-0.63	13.69	0.09386	-0.73	13.64	0.05715	-1.43	13.29	0.08865	-0.01	13.88	0.95782	0.05	13.92	0.83934	-0.77	13.5	0.01673	0.67	13.87	0.00761	-0.04	13.51	1	-0.17
	THC0290_N_0531	867274	867320	-1	Region	3prime	new TR			-0.71	8.44	0.01537	0.08	8.83	0.61727	-0.8	8.54	0.01287	-1.64	8.4	0.02263	0.11	8.31	0.68918	0.91	8.6	0.09578	-1.79	7.25	0.51592	-1.93	7.18	0.42162	0.59	9.23	0.09439	0.91	9.39	0.04197	-0.67	8.6	0.0341	-0.24	8.58	0.21487	0.11	8.75	1	0.08
secG	THC0290_0730	867321	867695	-1	CDS		Preprotein translocase SecG subunit	THC0290_v2_0781	secG	-0.65	13.03	0.01166	-1.14	12.78	0.00283	-0.49	13.21	0.05588	-0.92	12.58	0.00373	-0.06	13.07	0.76414	0.08	12.72	0.68789	0.07	12.72	0.66656	-0.14	12.61	0.67125	-0.02	13.44	0.95083	-0.06	13.42	0.83934	-0.61	13.15	0.05159	-0.53	12.94	0.0487	0.08	13.24	1	-0.08
	THC0290_0731	867699	868541	-1	CDS		Protein of unknown function	THC0290_v2_0782		0.14	10.43	0.79002	-0.06	10.33	0.86566	-0.25	10.27	0.15074	1.33	10.73	0.00349	0.12	9.92	0.60314	-0.17	10.07	0.6146	-0.06	10.13	0.82365	0.37	10.34	0.69841	0.04	10.42	0.88641	-0.03	10.38	0.92062	-0.06	10.37	0.74244	-0.33	9.98	0.10806	-0.07	10.11	1	-0.12
	THC0290_N_0532	868542	868640	-1	Region	intra	new TR			-0.62	11.11	0.0338	-0.61	11.11	0.01704	-0.43	11.29	0.14701	1.52	11.81	0.00191	0.14	10.98	0.5601	-0.12	11.22	0.62911	-0.33	11.11	0.18581	-0.35	11.11	0.47463	0.19	11.6	0.60684	-0.03	11.49	0.94349	0.03	11.52	0.95364	-0.18	11.21	0.47292	-0.19	11.21	1	-0.21
	THC0290_0732	868641	869144	-1	CDS		Probable lipoprotein precursor. Putative lipopolysaccharide assembly protein LptE	THC0290_v2_0783		-0.4	10.85	0.05247	-0.43	10.83	0.09097	-0.37	10.81	0.06114	1.28	11.61	0.0022	0.13	10.68	0.48944	0.03	11.35	0.9256	-0.01	11.33	0.97269	-0.57	11.05	0.30955	0.24	11.12	0.40599	0.06	11.03	0.8118	0.21	11.1	0.37185	0.02	10.79	0.91588	0	10.78	1	0
	THC0290_N_0533	869145	869218	-1	Region	intra	new TR			0.05	10.14	0.81874	0.52	10.38	0.09408	-0.38	10.15	0.09898	1.68	11.08	0.00082	0.16	9.62	0.47299	0.1	10.93	0.77483	-0.44	10.66	0.15338	-1.11	10.32	0.28385	0.03	10.36	0.91707	-0.05	10.32	0.86423	0.12	10.41	0.53698	0.39	10.11	0.05164	0.14	9.98	1	0.01
	THC0290_0733	869219	870475	-1	CDS		Probable sigma-54-dependent transcriptional regulator	THC0290_v2_0784		-0.44	11.05	0.04273	0.23	11.39	0.18957	-0.37	11.14	0.0921	1.62	12.23	0.00062	0.04	10.69	0.86489	-0.1	11.74	0.66731	-0.32	11.63	0.16128	-0.6	11.49	0.15529	0.19	11.42	0.51867	0.06	11.36	0.843	0.02	11.34	0.94698	0.51	11.26	0.02368	-0.07	10.97	1	0.01
	THC0290_N_0534	870476	870543	-1	Region	5prime	new TR			-0.61	10.5	0.06518	0.2	10.91	0.46952	-0.49	10.49	0.11639	2.07	11.51	0.00055	0.21	9.9	0.31536	0.07	11.47	0.78553	-0.11	11.38	0.62309	-0.31	11.28	0.43961	0.06	10.76	0.86507	0.2	10.83	0.53656	0.22	10.84	0.4209	0.84	10.66	0.00579	0.11	10.3	1	-0.13
	THC0290_N_0535	870545	870960	-1	Region	intra	new TR			-1.04	9.89	0.00724	-0.27	10.27	0.15301	-0.67	10.17	0.01875	2.97	10.78	0.00053	0.33	9.51	0.17155	0.01	10.97	0.98059	-0.34	10.8	0.23282	-0.74	10.59	0.12402	-0.04	10.49	0.91404	0.1	10.55	0.71015	0.2	10.6	0.24359	1	10.4	0.00565	0.03	9.91	1	-0.05
miaB	THC0290_0734	870961	872406	-1	CDS		Probable TRNA-i(6)A37 modification enzyme MiaB	THC0290_v2_0785	miaB	-0.23	11.13	0.13972	0.82	11.65	0.00547	-0.29	11.16	0.08839	2.14	11.97	0.00055	0.09	10.74	0.69176	0.85	12.43	0.087	1.53	12.77	0.02963	2.54	13.28	0.04075	0.16	11.38	0.48043	0.19	11.4	0.36407	0.1	11.36	0.50494	0.94	11.48	0.00385	0.01	11.01	1	-0.01
	THC0290_N_0536	872624	872743	-1	Region	3prime	new TR			1.15	6.8	0.01556	0.73	6.59	0.01657	1.09	6.44	0.01713	-1.42	5.17	0.00734	-0.02	6.37	0.97442	-1.24	5.54	0.37915	-0.75	5.79	0.66907	0.04	6.18	0.99135	-0.48	5.66	0.29953	-0.74	5.53	0.06788	-0.58	5.61	0.03365	0.11	6.19	0.83912	0.03	6.16	1	0.07
remH	THC0290_0735	872744	873166	-1	CDS		Gliding motility protein RemH precursor	THC0290_v2_0787	remH	1.56	13.42	0.00413	0.51	12.89	0.08965	1.46	13.07	0.00822	-1.05	12.74	0.00139	-0.23	13.5	0.43725	-0.83	11.44	0.14855	-0.51	11.6	0.13161	-0.53	11.59	0.42436	-0.55	12.06	0.0879	-0.48	12.09	0.18869	-0.3	12.19	0.1193	-0.61	12.79	0.00883	0.22	13.2	1	-0.23
	THC0290_0736	873196	873774	-1	CDS		Protein of unknown function precursor	THC0290_v2_0788		1.53	12.96	0.00302	0.59	12.48	0.02372	1.55	12.72	0.00822	-1.14	12.57	0.0013	-0.22	13.05	0.4145	-0.94	11.16	0.09462	-0.8	11.22	0.06916	-0.8	11.23	0.20084	-0.62	11.64	0.08785	-0.55	11.67	0.17383	-0.41	11.74	0.06917	-0.9	12.36	0.01013	-0.02	12.8	1	0.1
	THC0290_0737	873818	874630	-1	CDS		Protein of unknown function	THC0290_v2_0789		1.65	11.54	0.00339	1.97	11.7	0.00192	1.86	11.25	0.00822	-0.62	11.65	0.00438	-0.23	11.67	0.29093	-0.47	10.97	0.15336	-0.8	10.81	0.04835	-0.02	11.2	0.94152	-0.35	10.15	0.25721	-0.31	10.17	0.28832	-0.65	10	0.09976	-0.91	10.92	0.00789	0.03	11.39	1	0.1
topA	THC0290_0738	875152	877668	1	CDS		DNA topoisomerase I	THC0290_v2_0790	topA	-1.84	10.59	0.00298	-1.28	10.87	0.00376	-1	10.94	0.00988	-0.15	9.81	0.30305	0.23	10.56	0.27314	-0.15	10.02	0.5521	-0.55	9.82	0.19524	-0.53	9.83	0.2169	0.43	11.66	0.13302	0.36	11.62	0.15131	-0.63	11.13	0.03287	-1.25	10.52	0.00714	0	11.14	1	0.09
fjo29	THC0290_0739	877672	878817	1	CDS		Protein of unknown function Fjo29	THC0290_v2_0791	fjo29	-1.2	10.37	0.01391	-1.02	10.46	0.00413	-0.51	10.68	0.03763	0.61	9.98	0.00869	0.08	10.15	0.73229	-0.38	10.04	0.29909	-0.1	10.18	0.91611	0.52	10.49	0.19127	0.28	11.07	0.31305	0.24	11.05	0.39438	-0.42	10.72	0.10792	0.02	10.52	0.84942	0.19	10.6	1	-0.08
[truncated: 2,647 more rows]
[truncated: 29 more columns]

## Sheet: DEG-list_per_condition
Test.vs.Reference	Locustag	Regulation_type	Type	Classif	Annotation	Label_v2	Gene_v2	logFC	AveExpr	adj.P.Val
Anaer.vs.Ctrl	THC0290_1963	induction	CDS		1-aminocyclopropane-1-carboxylate deaminase	THC0290_v2_2065	acdS	1.02	11.17	0.01661
[truncated: 12,285 more rows]
