# Supplementary material for: Transcriptome architecture and regulation at environmental transitions in flavobacteria: the case of an important fish pathogen
Source: ISME Commun. 2021 Jul 7;1:33. doi: 10.1038/s43705-021-00029-9 (PMC9723704; doi:10.1038/s43705-021-00029-9)
Supplement: Supplementary file 7 — Table S6 [file 43705_2021_29_MOESM7_ESM.xlsx]

## Sheet: Legend
Table S6: Antisense transcription determined by RNA-Seq in F. psychrophilum OSU THCO2-90
Sheet	Description
CDSs with antisense	List of CDSs with features transcribed on the opposite strand.
asRNAs	List of new transcribed regions identified on the opposite strand of annotated CDSs.
Column	Description
#sheet = CDSs with antisense
Locustag	Locustag retrieved from the F. psychrophilum THCO2-90 genome, ENA accession number LT670843.1 (Rochat et al, Genome Announc. 2017 Feb 23;5(8)).
Start	Coordinates according to the F. psychrophilum THCO2-90 genome sequence LT670843.1.
End	Coordinates according to the F. psychrophilum THCO2-90 genome sequence LT670843.1.
Strand	(+) for positive, (-) for negative strand.
Name	Gene name according to the F. psychrophilum THCO2-90 genome sequence LT670843.1.
Locustag_v2	Locustag retrieved from the F. psychrophilum THCO2-90 genome annotation of the MicroScope annotation platform (unpublished data).
Name_v2	Gene name according to the F. psychrophilum THCO2-90 genome annotation of the MicroScope annotation platform (unpublished data).
Annotation	Description of the protein product.
Length	CDS length (in bp)
NfeatAS.newregions	Number of new TRs detected on the opposite strand.
AS.ltag.main	Locustag of the feature overlapping the CDS on the opposite strand. For CDSs with multiple overlapping features, the table reports the first one according to antisense direction.
AS.ltag.all	List of locustag of all new TRs detected on the opposite strand.
microarray expression values columns	Quantile-normalized log2-expression values of 64 microarray hybridizations. Two biological replicates were performed for 32 biological conditions (full description in Table S1).
#sheet = asRNAs
Locustag	Locustag according to the annotation of new transcribed regions on the F. psychrophilum THCO2-90 genome (this study).
Start	Coordinates of new TRs on the F. psychrophilum THCO2-90 genome (this study).
End	Coordinates of new TRs on the F. psychrophilum THCO2-90 genome (this study).
Strand	(+) for positive, (-) for negative strand.
Classif	Manually validated structural annotation of new transcribed regions (TRs). The different categories are: 5prime, 3prime and 3prime-PT (3' region transcribed after partial termination), Indep (regions transcribed independently of annotated CDSs), Intra (between two annotated CDSs) and repeated_regions.
Gene_context	Gene name and locustag (in brackets) of the CDS located downstream (for 5') or upstream (for 3') of the new TR.
Length	Length of the new TR.
NfeatAS	Number of features (CDS, TRs or RFAM elements) on the opposite strand.
NfeatAS.newregions	Number of new TRs on the opposite strand.
NfeatAS.CDSs	Number of CDS on the opposite strand.
CumLengthAS.CDSs	Length of the overlap with the CDSs detected on the opposite strand.
NfeatAS.others	Number of RFAM elements on the opposite strand.
AS.ltag.main	Locustag of the CDS overlapping the new feature on the opposite strand. For new features with multiple overlapping CDSs, the table reports the first one according to antisense direction.
AS.ltag.all	List of locustag of all CDSs annotated on the opposite strand.
cdsprednumber	Number of predicted CDSs within the new TRs.
cdspredinfo	Start and end coordinates of predicted CDS on the genome, (+) for positive, (-) for negative strand.
cdspredproba	Confidence probability for the existence of the predicted CDS.
cdspredoverlapbp	Length of the overlap with the CDS on the opposite strand.
cdspredaaseq	Predicted protein sequence.
microarray expression values columns	Quantile-normalized log2-expression values of 64 microarray hybridizations. Two biological replicates were performed for 32 biological conditions (full description in Table S1.

## Sheet: CDSs with antisense
Locustag	Start	End	Strand	Name	Locustag_v2	Name_v2	Annotation	Length	NfeatAS.newregions	AS.ltag.main	AS.ltag.all	T1_a	T1_c	T2_a	T2_c	T3_a	T3_c	T4_a	T4_c	T5_a	T5_c	T2-FCS_a	T2-FCS_b	TYESA-FCS_a	TYESA-FCS_b	TYESA_a	TYESA_b	TYESA-0.5_a	TYESA-0.5_b	TYESA-0.2_a	TYESA-0.2_b	CS3_a	CS3_c	Temp10C_a	Temp10C_c	Temp4C_a	Temp4C_c	DIP_a	DIP_c	NaCl_a	NaCl_c	CS1_a	CS1_b	HP_a	HP_b	LYSO_a	LYSO_b	CS2_a	CS2_b
THC0290_0004	4422	4781	-1	folB	THC0290_v2_0004	folB	Dihydroneopterin aldolase	360	1	THC0290_N_0004	THC0290_N_0004	9.27292	9.55902	10.1706	10.192	10.7925	10.8947	10.8322	12.0445	11.4843	11.6231	10.05	10.383	11.218	11.2574	10.9613	10.9321	10.9103	11.4523	11.7697	11.0854	9.12551	9.40568	9.7287	9.25561	9.56595	9.46906	9.77495	9.89076	9.60601	9.86054	9.62761	9.28131	9.93843	10.1013	9.6388	9.54557	9.36828	9.44494
THC0290_0005	4885	6972	1	glnS	THC0290_v2_0005	glnS	Glutamine--tRNA ligase	2088	1	THC0290_N_0006	THC0290_N_0006	11.2884	11.2094	10.9212	10.9947	10.9173	10.9633	11.092	11.1697	11.1286	10.8424	11.1781	11.1112	10.7313	10.8405	11.0155	10.8461	10.3697	10.4594	10.1875	9.90718	11.3328	11.2295	11.3046	11.3126	11.2922	11.3617	10.8154	10.8677	11.2474	11.232	11.2766	11.1761	11.1326	11.1047	11.2495	11.1916	11.1676	11.1286
THC0290_0008	7968	8222	1		THC0290_v2_0008		Protein of unknown function	255	1	THC0290_N_0007	THC0290_N_0007	12.4078	12.7416	13.066	13.3903	14.1453	14.0199	14.2101	15.4393	14.3087	14.341	12.9976	13.2436	15.4393	15.4393	15.2678	15.502	15.1492	15.0366	15.4052	15.1492	12.2531	12.8929	12.5312	12.0542	12.6214	12.06	12.9828	13.3352	13.956	14.4822	12.4944	12.3996	13.2748	13.1571	12.7209	12.4078	12.8429	12.9569
THC0290_0009	8244	9227	-1		THC0290_v2_0009		Band 7 family protein	984	1	THC0290_N_0008	THC0290_N_0008	11.5715	11.6044	11.8516	11.9182	12.075	12.4039	12.5312	12.4177	13.2234	13.0034	11.7719	11.8538	12.4747	12.2531	12.5349	12.4524	12.6046	12.5657	14.5928	14.492	11.427	11.4031	11.9153	11.9642	12.06	12.0505	11.427	11.3026	10.6001	10.6021	11.544	11.5831	12.1498	12.2135	11.5672	11.5896	11.4799	11.4091
THC0290_0010	9389	10894	-1	gltX	THC0290_v2_0010	gltX	Glutamate--tRNA ligase	1506	1	THC0290_N_0010	THC0290_N_0010	11.147	11.1528	10.5737	10.532	10.3258	10.0993	10.4141	10.7904	11.1347	11.011	10.5339	10.4828	10.5633	10.8739	10.6986	10.7465	10.402	10.0167	9.93843	10.6836	11.1286	11.1635	11.6931	11.8124	11.8153	11.6681	10.5633	10.5608	10.2757	10.3038	10.8985	10.8424	10.711	10.7008	10.9411	10.8698	11.0067	10.7291
THC0290_0030	48175	48993	-1		THC0290_v2_0031		Probable outer membrane protein precursor, OmpA family	819	1	THC0290_N_0028	THC0290_N_0028	7.44072	7.47539	7.82336	7.84737	8.13012	8.10331	7.94046	9.29315	8.59754	8.28671	7.96906	8.07588	8.87079	9.06789	7.85926	8.13012	8.13533	8.65628	8.98881	9.16902	7.23499	7.62336	7.1798	6.89207	6.96768	6.6445	7.8161	7.73897	7.35575	7.88889	7.67633	7.80465	7.57321	7.49272	7.66871	7.62336	7.48468	7.64654
THC0290_0047	68944	69930	-1		THC0290_v2_0048		Hypothetical lipoprotein precursor	987	1	THC0290_N_0039	THC0290_N_0039	11.8882	12.009	10.8907	11.1206	11.4912	10.9148	11.1445	10.9103	9.35122	9.45937	10.4765	10.4324	8.49259	8.61787	9.1547	9.2444	9.57625	9.55627	9.4314	9.07388	12.0065	11.8467	12.0205	11.9877	12.234	11.7913	11.8018	11.9405	10.9801	10.8759	11.2513	11.7438	10.8135	10.9822	11.5215	11.7489	11.9706	11.7061
THC0290_0056	78125	78907	1	crt	THC0290_v2_0057	crt	Probable 3-hydroxybutyryl-CoA dehydratase	783	1	THC0290_N_0043	THC0290_N_0043	11.0291	10.9702	10.7882	10.8907	11.7336	11.8486	12.1851	11.8856	12.026	11.6285	10.7008	10.7438	10.3671	10.0636	11.1206	11.3426	10.6648	10.9928	11.3941	10.9757	11.0272	10.9888	11.0479	11.0007	11.1248	10.945	10.9757	11.0247	10.8826	10.8739	10.8947	11.0171	11.0291	11.18	10.8865	11.0291	10.9257	10.9909
THC0290_0057	78916	79563	-1		THC0290_v2_0058		Probable hydrolase	648	2	THC0290_N_0045	THC0290_N_0044;THC0290_N_0045	8.7117	8.7117	8.37169	8.42311	8.21199	8.00132	8.37169	8.83225	9.18091	9.36566	8.37886	8.39614	9.86054	9.99604	10.125	9.87441	9.15798	9.3878	7.94046	8.09694	8.68647	8.56055	9.01883	8.48494	8.95198	9.02912	8.23158	8.46892	8.81696	9.04953	8.90734	8.99152	8.40046	8.16952	9.02577	8.96623	9.07388	9.24731
THC0290_0067	87874	88914	-1	tas	THC0290_v2_0068	tas	Oxidoreductase Tas, aldo/keto reductase family	1041	1	THC0290_N_0051	THC0290_N_0051	9.69482	9.39264	9.32102	9.30824	8.95198	8.8496	8.88414	9.09542	9.22192	9.30824	9.50092	9.40008	9.32729	9.04655	9.28996	9.1342	8.33216	8.41061	7.74551	6.58879	9.70656	9.55902	9.82137	9.94318	9.87889	9.96599	9.10166	9.1431	10.2372	10.1558	9.14016	9.34326	8.6785	8.72855	9.18703	9.26691	9.49027	9.28996
THC0290_0083	107603	108094	-1		THC0290_v2_0084		Protein of unknown function precursor	492	1	THC0290_N_0063	THC0290_N_0063	8.73195	8.69686	8.68647	8.62601	8.06998	8.4057	8.75178	7.2427	8.90734	8.83511	8.72043	8.49259	9.7402	9.77954	9.07941	8.28212	9.9407	9.55363	9.07688	9.26081	9.21681	8.3288	8.60516	8.94918	8.14923	8.61787	7.9459	7.77019	8.31048	7.28941	8.78686	8.88719	8.71633	8.05432	8.71633	8.91384	9.01883	8.89134
THC0290_0090	115174	117234	-1	pepO	THC0290_v2_0091	pepO	M13 family metallopeptidase PepO precursor	2061	1	THC0290_N_0070	THC0290_N_0070	12.6692	12.6692	13.1242	12.9771	12.0126	11.9735	11.6386	9.83811	10.2912	10.5716	13.5043	13.3548	10.0167	9.69011	10.7714	10.6758	10.4493	10.1706	10.0063	10.6296	12.7246	12.1271	12.944	13.05	13.1962	12.9287	11.9487	11.9043	13.3086	12.7903	12.944	12.8673	12.2531	12.159	12.8043	12.8845	12.8482	12.7164
THC0290_0107	136226	138043	-1		THC0290_v2_0107		Putative outer membrane protein precursor	1818	1	THC0290_N_0080	THC0290_N_0080	8.8496	8.9423	8.80221	9.26413	9.63436	9.60883	10.0543	9.51849	11.486	11.1488	8.8496	8.99152	11.4416	11.3347	11.8663	11.8663	12.3996	12.708	12.5916	12.7459	9.00726	9.08704	9.54112	9.53319	9.45247	9.60365	9.38538	9.53588	9.02912	9.07941	8.72459	8.6785	8.59343	8.69372	8.7117	8.68279	9.00726	8.79908
THC0290_0131	162019	162429	-1		THC0290_v2_0131		Protein of unknown function	411	1	THC0290_N_0091	THC0290_N_0091	10.402	10.4549	9.82806	9.67257	8.83225	8.93872	8.78686	7.90465	9.0822	9.37778	10.0226	9.59424	9.20447	8.53888	8.75948	8.44026	8.93544	8.64577	7.11504	6.89207	11.0155	10.4631	10.351	10.3609	10.1581	10.5233	9.66572	9.57888	10.1811	9.79319	10.2133	10.3568	9.11073	8.85373	10.1727	10.4981	10.9023	10.7313
THC0290_0132	162619	163638	-1	pheS	THC0290_v2_0132	pheS	Phenylalanine--tRNA ligase alpha subunit	1020	1	THC0290_N_0091	THC0290_N_0091	12.3918	12.372	12.2556	11.8905	11.3963	11.721	11.6127	9.14552	11.7807	12.0032	12.1851	11.9205	11.1286	10.5864	11.092	10.8781	10.7349	10.8441	10.6081	9.81488	12.8845	12.179	12.5536	12.8382	12.3251	12.6827	11.82	11.5215	12.1687	11.4009	12.4875	12.3426	11.9951	11.721	12.2847	12.3426	12.7209	12.396
THC0290_0134	164278	164808	1		THC0290_v2_0134		Probable transmembrane protein of unknown function	531	1	THC0290_N_0095	THC0290_N_0095	8.82446	8.66456	8.72043	8.83225	8.82108	9.06219	8.64577	8.1902	9.51336	9.7223	8.93212	8.74291	10.1661	10.3344	9.23862	8.69046	11.0189	11.3867	11.0639	11.9356	8.58442	8.61787	8.86722	8.80986	8.8394	8.5475	8.10946	8.08006	8.52189	8.48494	8.49259	8.5013	8.0916	8.37886	8.61787	8.52189	8.72043	9.18399
THC0290_0135	164792	165535	-1	batE	THC0290_v2_0135	batE	BatE protein	744	1	THC0290_N_0096	THC0290_N_0096	9.24185	9.25349	9.14552	8.98189	8.88719	8.56865	8.6785	9.36566	7.3982	7.0619	9.20447	9.20177	9.17804	8.32106	9.72412	9.71782	9.72004	9.34326	8.30124	7.84737	9.55902	9.65279	9.05239	9.6323	9.54112	9.35379	8.54302	8.62129	10.6939	10.6882	9.02577	8.78686	9.87441	9.91125	9.1342	8.76729	9.56163	9.39264
THC0290_0150	183908	184489	-1	nadD	THC0290_v2_0153	nadD	Nicotinate-nucleotide adenylyltransferase	582	1	THC0290_N_0109	THC0290_N_0109	10.6236	10.6062	10.4493	10.3164	10.3652	10.6001	10.1622	10.1291	9.75172	10.1854	10.6446	10.5565	10.5258	10.8198	9.74964	9.50883	11.4885	11.5417	10.7329	10.6081	10.9367	10.8638	10.5045	10.3934	10.2417	10.5339	10.0744	9.90239	10.5218	10.3185	10.5045	10.5959	10.2519	10.0636	10.5045	10.5903	10.6341	10.5737
THC0290_0159	197573	198358	1		THC0290_v2_0162		Probable hydrolase	786	1	THC0290_N_0123	THC0290_N_0123	8.36212	8.41893	8.02785	7.77019	7.74551	7.82992	8.05962	8.89134	9.12777	8.95499	8.02785	7.9459	7.93025	7.62336	7.48468	7.58988	5.98472	7.27095	6.24775	7.48468	8.56055	8.73195	8.4057	8.68647	8.53012	8.66789	7.84737	7.85926	7.69131	7.88357	8.08473	8.08006	8.03264	7.93562	8.13012	8.27761	8.69372	8.59343
THC0290_0160	198355	201123	-1		THC0290_v2_0163		Protein of unknown function	2769	1	THC0290_N_0124	THC0290_N_0124	9.8524	9.80836	10.0127	9.9474	9.8447	10.145	9.77495	9.96419	8.99152	9.06789	10.4063	10.4631	8.99152	9.03741	8.86397	8.67185	9.47184	8.95198	9.35379	8.31048	9.90482	9.88578	9.94947	9.70863	9.75172	9.93843	9.71576	9.79319	10.5608	10.6556	9.91603	9.96786	10.1409	10.0897	9.85461	10.043	9.80836	9.82623
THC0290_0166	210086	211081	1		THC0290_v2_0170		Protein of unknown function	996	1	THC0290_N_0132	THC0290_N_0132	8.24882	8.16952	8.38778	8.60924	9.13055	8.88107	9.44755	9.96205	10.3038	10.0127	8.5518	8.45306	10.0381	10.3589	9.30565	9.35925	10.2782	10.5067	10.7949	11.3347	7.96205	7.93025	8.19676	8.38778	8.03886	7.89979	8.28671	8.42311	8.2533	8.22667	8.22154	8.02785	8.68647	8.73926	8.27761	8.24882	8.03886	7.9459
THC0290_0167	211078	211500	-1		THC0290_v2_0171		Probable lipoprotein precursor	423	1	THC0290_N_0133	THC0290_N_0133	11.4912	11.5417	11.576	11.2513	10.9633	11.3984	11.0539	9.73333	10.8301	10.8135	11.0985	10.86	10.7204	10.3059	10.5923	10.2734	10.3671	10.5339	10.5903	10.1581	11.8227	11.7088	11.9518	11.9385	11.5005	11.9735	11.5672	11.4738	11.9706	11.6258	11.5377	11.4111	11.0657	11.0047	11.4009	11.5355	11.6979	11.5737
THC0290_0189	237209	237979	1		THC0290_v2_0197		Enoyl-CoA hydratase/isomerase family protein	771	1	THC0290_N_0145	THC0290_N_0145	10.7125	10.9045	9.39053	9.44494	9.01289	8.84668	9.37275	7.91755	9.79741	9.32102	9.42089	8.95499	7.15444	8.16952	7.46743	7.73897	8.25914	7.75698	7.13339	8.95781	11.0007	10.3671	11.042	10.6361	10.9006	11.1225	9.70404	9.7287	10.0406	9.83375	10.9928	11.0742	10.5484	10.3993	11.1162	10.9681	11.2273	11.3086
THC0290_0190	238052	238456	-1		THC0290_v2_0198		Probable protein chain release factor	405	1	THC0290_N_0146	THC0290_N_0146	9.31822	9.24731	9.60132	9.64067	9.35379	9.84969	9.02224	9.26081	8.57303	9.06219	9.89286	9.49027	8.90408	9.06219	7.83631	7.91755	8.46538	7.92363	8.86722	10.3993	9.28131	9.40905	8.97258	8.89532	8.86722	9.21948	9.2444	9.22715	9.50092	9.54329	9.38065	9.48519	9.07388	9.37778	9.08704	9.34562	9.27554	9.69273
THC0290_0191	238456	240570	-1		THC0290_v2_0199		Probable bifunctional protein : transcriptional regulator NadR family and of unknown function	2115	1	THC0290_N_0146	THC0290_N_0146	10.5565	10.3462	10.3545	10.2196	9.697	9.86766	9.59424	8.33216	9.46218	9.67018	10.6714	10.6882	9.04041	9.21681	9.04041	8.92416	9.04353	8.91061	9.11073	9.06219	10.4937	10.3527	10.1118	10.0702	9.86263	10.1558	10.0657	9.9407	10.4222	10.3164	10.3185	10.3609	10.4042	10.4549	10.3185	10.4298	10.3782	10.5656
THC0290_0197	244941	245891	1	ltd	THC0290_v2_0205	ltd	L-threonine 3-dehydrogenase	951	1	THC0290_N_0149	THC0290_N_0149	11.3284	11.2495	11.5417	11.5355	11.736	11.7159	11.5487	10.1035	11.7964	11.482	11.5283	11.6231	11.3026	11.2025	11.2594	11.2793	11.237	11.0985	11.5831	11.8302	11.4031	11.4176	11.5781	11.4758	11.5487	11.5397	11.364	11.2495	11.0742	11.2922	11.4664	11.3261	11.3889	11.4714	11.4458	11.5215	11.3215	11.2709
THC0290_0201	250719	251186	-1		THC0290_v2_0209		Adenylate cyclase family protein	468	1	THC0290_N_0154	THC0290_N_0154	8.26819	8.38295	8.42311	8.69686	9.58909	9.64721	10.043	10.0183	10.9702	10.5275	8.39165	8.48093	11.4132	11.4617	11.0498	10.6668	11.3754	11.6541	11.1225	10.8543	8.37886	8.11974	9.07104	9.01289	9.11073	9.04041	8.70093	8.79908	8.15993	8.14417	8.04452	8.33778	9.01289	9.16328	8.33778	8.27268	8.34726	8.21639
THC0290_0205	255026	255595	-1	purN	THC0290_v2_0213	purN	Phosphoribosylglycinamide formyltransferase	570	1	THC0290_N_0160	THC0290_N_0160	9.7993	9.8524	9.05239	8.77485	8.02249	8.14417	7.86535	7.67633	7.82336	7.69131	9.25843	9.18399	7.87124	7.47539	7.22535	7.432	8.10946	8.17486	8.70477	9.27292	9.92919	9.93594	9.87441	9.82137	9.7017	9.74499	8.79116	8.66456	9.61602	9.57888	9.71576	9.48806	8.60135	8.39614	9.65714	9.65489	9.81488	9.82365
THC0290_0210	258953	260383	1	pykA	THC0290_v2_0219	pykA	Pyruvate kinase	1431	1	THC0290_N_0165	THC0290_N_0165	12.1013	12.0006	11.6073	11.7281	11.6334	11.4416	11.8663	11.6979	11.7748	11.7088	11.6454	11.7697	12.3389	12.4212	12.7636	12.6175	11.6955	11.5997	11.2709	11.1004	12.0971	12.2375	12.3918	12.5767	12.5419	12.5419	11.5715	11.6432	11.9278	11.8636	11.8905	11.5603	11.7807	11.8882	11.7138	11.5192	11.8801	11.8715
THC0290_0218	266397	266870	-1		THC0290_v2_0227		Protein of unknown function	474	1	THC0290_N_0169	THC0290_N_0169	9.43407	9.30281	9.26997	9.09542	8.62129	9.22192	8.41893	7.38181	8.60135	8.60924	9.1957	8.97258	9.79046	9.1547	8.95198	8.38295	10.1558	10.3258	9.37064	9.28743	9.76871	9.04655	9.16039	9.31822	8.78686	9.31294	8.46111	8.02249	9.08704	8.59343	9.48806	9.46682	9.1957	8.88414	9.18963	9.67456	9.66765	9.84031
THC0290_0225	273869	274462	1	lspA	THC0290_v2_0235	lspA	Signal peptidase II	594	1	THC0290_N_0173	THC0290_N_0173	10.4202	10.0316	9.69011	9.93346	10.125	10.7904	10.424	10.8501	11.3366	11.427	9.93594	9.56595	11.1326	11.218	10.6315	10.7816	10.9801	11.147	11.3191	11.3046	10.0784	10.5818	10.1875	10.3803	10.532	10.3118	9.7993	9.8301	10.1767	10.5843	9.94318	9.97226	10.0565	10.2502	9.82806	10.0183	10.226	10.532
THC0290_0226	274463	275026	-1	ygfA	THC0290_v2_0236	ygfA	5-formyltetrahydrofolate cyclo-ligase	564	1	THC0290_N_0174	THC0290_N_0174	8.41893	8.37886	8.63692	8.62129	8.97258	8.97896	8.62129	9.19879	9.16039	9.13055	8.69046	8.74735	9.50883	9.81242	8.91061	8.44509	10.0001	9.66765	9.76871	10.7067	8.31048	8.05962	8.15993	7.76329	7.93025	7.99587	8.34234	8.35302	8.10331	8.05432	8.37169	8.27268	8.32501	8.46111	8.37169	8.10946	8.09694	7.99072
THC0290_0241	297417	297623	-1		NA		Biotin synthase	207	1	THC0290_N_0184	THC0290_N_0184	11.6285	11.6681	12.5014	12.5494	12.4112	12.944	12.5536	10.4653	12.9884	13.5266	12.3856	12.0205	14.0105	13.2806	13.4142	13.0255	13.8394	13.7591	13.9753	13.6377	12.1069	11.621	11.8687	11.7566	11.5192	11.7937	11.9606	11.5923	12.2753	11.8352	11.8069	11.9795	11.6979	11.6101	12.0505	12.1154	11.6308	11.9182
THC0290_0245	300280	301329	-1	queA	THC0290_v2_0255	queA	S-adenosylmethionine:tRNA-ribosyltransferase- isomerase	1050	1	THC0290_N_0186	THC0290_N_0186	12.8629	12.8337	12.5657	12.5574	12.8043	13.2019	13.1242	13.1638	13.6167	13.7785	12.4909	12.512	13.956	13.5121	13.5852	13.3765	14.5928	14.6711	15.8228	16.1149	12.9617	12.9396	13.0104	13.1068	13.0104	13.1294	12.7379	12.7246	12.4482	12.5574	12.8086	12.8482	12.751	12.7379	12.7379	12.8086	13.0034	13.2019
THC0290_0265	323507	323950	1		THC0290_v2_0275		Hypothetical protein	444	1	THC0290_N_0200	THC0290_N_0200	6.47655	6.75114	7.42371	7.2427	7.55797	7.50097	7.28941	8.83511	8.0916	8.94599	7.35575	7.59735	8.67185	9.24731	8.79549	8.65311	8.92416	8.83511	9.75911	8.83511	6.72349	6.47655	4.8993	5.22358	5.29545	4.8993	7.03724	7.22535	7.73254	7.99072	7.11504	6.89207	7.19717	7.16259	7.14422	6.95491	6.69899	7.05011
THC0290_0266	323966	324199	-1		THC0290_v2_0276		Transcriptional regulator, XRE family	234	1	THC0290_N_0201	THC0290_N_0201	8.16952	8.17486	8.00646	7.86535	7.63232	8.85373	7.0619	8.46892	8.11531	9.05239	8.31048	8.37886	9.7993	9.75432	7.89454	8.22667	10.1727	10.4388	9.7314	11.2025	8.44026	8.70093	7.92363	7.84737	8.12361	8.32106	7.85926	7.67633	8.01163	8.33216	7.82992	8.26367	6.90615	6.89207	8.16952	8.53012	8.16952	9.45937
THC0290_0306	372055	372684	-1		THC0290_v2_0316		Probable polysaccharide deacetylase	630	1	THC0290_N_0222	THC0290_N_0222	9.33265	9.16039	9.9576	9.78163	10.2115	10.4549	10.402	8.5518	9.77954	9.33008	9.70404	9.61349	9.44755	9.18399	8.69686	8.68647	9.44755	9.64067	9.7993	10.145	9.31822	9.11344	9.08956	9.05599	8.92765	9.05239	9.56595	9.39264	9.34067	9.17252	9.64283	9.54557	9.49869	9.55363	9.36566	9.7287	9.17252	9.09542
THC0290_0311	380031	381038	-1	fbp	THC0290_v2_0321	fbp	Fructose-bisphosphatase	1008	1	THC0290_N_0227	THC0290_N_0227	11.427	11.6625	11.3328	11.5417	11.3238	10.9023	11.0272	10.2887	11.2812	11.09	11.5168	11.3802	11.2437	11.1304	10.8698	10.9367	11.0657	10.9467	10.9613	11.3238	11.4617	11.5896	12.464	12.1887	12.464	12.3892	11.2812	11.2251	10.8198	10.9967	11.4523	11.4953	11.2793	11.2709	11.4885	11.5831	11.5877	11.3598
THC0290_0321	392440	393687	1		THC0290_v2_0333		Protein of unknown function	1248	1	THC0290_N_0235	THC0290_N_0235	8.49259	8.29241	8.25914	8.37169	9.04353	9.11073	9.72635	9.20776	10.809	10.5885	8.35741	8.24476	10.8301	10.8501	10.7125	10.4202	10.1747	10.3278	9.58909	8.95198	8.27268	8.24882	8.8394	9.00979	8.87079	9.08478	8.53012	8.64147	8.4057	8.30588	8.14923	8.27761	8.8496	8.78242	8.20194	8.26367	8.24882	8.12361
THC0290_0327	396899	397816	1		THC0290_v2_0339		Prenyltransferase family protein	918	1	THC0290_N_0238	THC0290_N_0238	9.42542	9.34864	9.14807	9.36283	9.33793	9.46682	9.62512	9.98944	9.07388	8.44026	9.23862	8.98189	9.49588	9.36566	9.25034	8.78242	9.46218	8.72459	6.50603	7.65426	9.46417	9.27292	9.18399	9.50092	9.22966	9.39264	9.49869	9.36828	9.92037	9.6815	8.87079	9.11344	9.39264	9.26997	8.8575	9.13735	9.44494	9.29315
THC0290_0329	398974	399336	1		THC0290_v2_0341		Protein of unknown function	363	1	THC0290_N_0241	THC0290_N_0241	9.48209	9.56595	9.05868	9.04655	9.12777	9.00979	9.41358	10.4101	9.51849	9.82623	8.68647	8.91384	10.5156	10.8582	10.5959	10.1059	10.943	10.7904	9.39264	7.98593	9.80836	9.80134	9.92497	10.6464	10.1471	10.4981	9.45693	9.55363	9.38319	9.18963	9.4314	8.97553	9.76626	9.82623	9.42542	9.09888	9.54329	9.31294
THC0290_0338	416249	416977	1		THC0290_v2_0350		Probable tRNA/rRNA methyltransferase	729	1	THC0290_N_0247	THC0290_N_0247	9.09888	9.21049	8.99386	8.95499	9.19879	9.39053	9.22966	9.7402	9.87663	9.71328	8.86109	8.92765	10.0724	9.93113	9.20776	8.91061	9.68557	9.62065	9.90239	10.1035	9.07688	9.20177	9.67018	9.58662	9.57112	9.47742	9.12551	9.01883	8.67507	8.66456	8.97553	8.86722	8.81362	8.66789	8.92416	8.92058	9.18091	8.95198
THC0290_0351	430697	431740	-1		THC0290_v2_0363		Putative carboxypeptidase	1044	1	THC0290_N_0257	THC0290_N_0257	10.5429	10.5003	10.2692	10.4892	10.6776	10.6427	10.7051	10.0127	10.6859	10.5818	10.7552	10.7513	10.3038	10.1291	10.0226	10.1035	10.58	10.2887	10.3207	10.8501	10.5275	10.5089	9.67257	9.93594	9.85665	9.85665	10.4368	10.4222	10.496	10.2044	10.5757	10.5447	10.6534	10.5359	10.4202	10.5108	10.5656	10.2869
THC0290_0358	441077	441781	1	yfiC	THC0290_v2_0370	yfiC	Protein of unknown function YfiC	705	1	THC0290_N_0263	THC0290_N_0263	10.8424	10.5633	9.46682	9.54872	8.26819	8.26819	7.79051	7.83631	8.43288	8.34234	9.55627	9.3878	6.95491	6.47655	7.53385	7.64654	3.97916	7.50823	7.95049	7.13339	10.7816	10.7313	10.2436	10.6405	10.53	10.6131	9.8301	9.77954	9.29857	9.39759	10.0764	10.2213	8.28212	8.4769	10.068	10.2417	10.8405	10.7493
THC0290_0359	441970	443148	-1	gcdH	THC0290_v2_0371	gcdH	Glutaryl-CoA dehydrogenase	1179	1	THC0290_N_0264	THC0290_N_0264	13.1571	13.1902	13.0606	13.2868	13.4354	13.2158	13.4828	12.041	13.7972	13.4681	13.1364	13.1004	12.9884	13.1004	13.2292	13.1704	13.1128	13.0104	12.751	12.9486	13.1364	13.041	13.2806	13.3007	13.3153	13.248	13.1704	13.248	12.9343	12.8206	12.9569	13.1068	12.9343	12.944	13.0548	13.0305	13.1188	12.8382
THC0290_0366	447661	448809	1		THC0290_v2_0379		Cys/Met metabolism PLP-dependent enzyme	1149	1	THC0290_N_0269	THC0290_N_0269	12.3562	12.3562	12.5081	12.7003	13.0104	12.8086	13.2806	12.7903	13.3548	12.9976	12.3783	12.4447	13.0197	13.3903	13.3765	13.248	12.7903	12.5349	12.8578	12.7416	12.2875	12.2982	12.656	12.4747	12.3892	12.464	12.6046	12.751	12.5834	12.6414	12.1757	12.2493	12.5957	12.6954	12.263	12.156	12.2875	12.2104
THC0290_0367	448910	449260	-1		THC0290_v2_0380		Protein of unknown function precursor	351	1	THC0290_N_0272	THC0290_N_0272	8.44509	8.65628	10.1386	10.468	11.7189	11.7138	12.2847	12.4975	14.7449	14.6037	10.0127	10.1097	15.3845	15.549	14.883	14.8384	15.8638	15.7148	16.0128	16.0128	8.39165	8.62601	8.46538	7.95049	8.01804	8.00132	10.3229	10.5405	9.35379	9.70863	9.75172	9.81242	13.9289	13.8853	10.0183	9.8524	8.73578	9.27292
THC0290_0382	465233	465565	1	ogt2	THC0290_v2_0396	ogt2	Methylated-DNA--[protein]-cysteine S-methyltransferase	333	1	THC0290_N_0276	THC0290_N_0276	9.18399	9.00375	8.21639	8.45658	8.45658	8.44026	8.75948	9.01883	9.22966	8.87401	8.44854	8.13012	7.84737	7.21628	7.69814	8.11531	5.18467	7.20629	5.3972	7.46743	9.27292	9.07104	9.07688	9.42089	9.22192	9.28492	8.47284	8.70093	8.81362	8.82798	8.64953	8.82108	8.48494	8.62129	8.63692	8.69372	9.24185	9.04953
THC0290_0383	465657	466046	-1		THC0290_v2_0397		Protein of unknown function precursor	390	1	THC0290_N_0277	THC0290_N_0277	7.47539	7.49272	7.72569	8.01804	8.30588	8.47284	8.86397	10.0201	9.04953	8.88107	7.66055	7.77789	9.49336	9.50092	8.99756	8.45658	9.42839	9.74499	9.11344	9.40267	7.53385	7.65426	7.72569	7.79742	7.87726	8.05432	8.36699	8.01163	8.18021	8.30124	7.97392	7.87726	7.32161	7.27095	7.58988	7.77019	8.3288	7.74551
THC0290_0393	478553	479161	-1		THC0290_v2_0407		Probable transmembrane protein of unknown function	609	1	THC0290_N_0282	THC0290_N_0282	6.85235	7.05011	7.03724	6.75114	6.68579	6.72349	6.3156	7.61316	6.71302	6.63028	7.13339	7.03724	7.05011	6.6445	5.86835	6.16079	4.32476	6.1785	6.09763	5.26077	6.95491	7.09383	7.50097	6.96768	7.08043	6.95491	6.6445	6.73552	6.80519	7.27986	7.00701	6.97864	6.49242	6.73552	6.77671	7.00701	7.0619	7.15444
THC0290_0395	481952	482293	-1		NA		Hypothetical protein	342	1	THC0290_N_0284	THC0290_N_0284	3.87282	3.97916	3.89734	3.98674	4.12661	3.93068	4.01937	4.29117	3.98674	4.45186	3.95849	3.95219	3.97916	3.99669	4.00702	3.89734	5.6804	6.02937	7.68329	3.97916	3.97916	3.97916	3.90824	3.88664	3.9395	3.92477	3.89734	4.19131	3.92477	3.99669	3.87282	3.99669	4.0528	3.92477	3.90824	3.96838	4.02749	3.98674
THC0290_0396	482475	482840	-1		THC0290_v2_0410		Protein of unknown function	366	1	THC0290_N_0285	THC0290_N_0285	7.26049	6.90615	5.4278	5.03441	4.52789	5.76587	5.06938	5.3972	5.26077	6.67062	5.52982	5.89361	7.50097	6.8285	6.6599	6.80519	7.11504	6.63028	6.33213	8.0916	7.48468	7.66871	7.86535	8.6785	8.27761	8.75948	5.73754	6.09763	6.43402	6.68579	6.1785	6.43402	6.21305	6.41727	5.91853	6.63028	7.33843	6.95491
THC0290_0400	487602	488744	-1		THC0290_v2_0415		Probable bifunctional protein : 2-amino-4-hydroxy-6-hydroxymethyldihydropteridine diphosphokinase and deoxynucleoside kinase	1143	1	THC0290_N_0290	THC0290_N_0290	9.05599	9.06488	8.76729	8.66456	8.41061	8.505	7.91755	8.45658	8.10946	7.47539	8.80986	8.82446	7.87726	7.42371	7.26049	6.75114	6.99509	6.57569	7.23499	9.02577	9.05599	9.08478	9.59424	9.4232	9.34326	9.51849	8.38778	8.37886	7.79051	7.79742	8.57585	8.77776	8.01804	8.01804	8.64953	8.73578	9.08956	8.92765
THC0290_0402	490800	493382	1		THC0290_v2_0417		Outer membrane protein precursor, AsmA family	2583	1	THC0290_N_0292	THC0290_N_0292	11.7832	11.7964	11.8952	11.8276	11.7088	11.7807	11.5168	10.9514	10.7145	10.6859	11.7036	11.8636	11.2533	10.9045	11.4223	11.5946	11.0539	11.0723	11.8856	11.478	11.859	11.8715	11.7995	11.7006	11.6127	11.7646	11.8636	11.9795	13.3697	13.2806	11.7543	11.8538	11.9518	11.82	11.8743	11.7964	11.925	11.6979
THC0290_0403	493642	494436	-1		THC0290_v2_0418		Protein of unknown function	795	1	THC0290_N_0293	THC0290_N_0293	9.37778	9.50334	9.69923	9.72412	10.2646	10.457	10.5588	11.4299	11.1697	10.9173	9.74765	9.87201	10.5045	10.727	10.1409	10.0784	11.0443	11.0463	11.5647	11.6541	9.3569	9.50334	9.32102	9.26081	9.26081	9.33008	9.89286	9.86263	9.18091	9.17804	9.71328	9.69482	9.92919	9.89549	9.66572	9.66572	9.51597	9.34562
THC0290_0405	495160	496668	1		THC0290_v2_0420		Protein of unknown function	1509	1	THC0290_N_0295	THC0290_N_0295	9.74237	9.89549	9.96786	9.97226	9.475	9.21948	8.58089	9.04353	8.36212	7.80947	10.3934	10.4742	8.01163	8.18021	7.58254	7.68329	8.60924	7.54121	8.41061	8.46111	9.78163	9.82623	9.62512	9.31294	9.52321	9.54872	9.38065	9.30824	9.96419	10.1208	9.79046	9.83189	9.21049	9.30565	9.78595	9.90001	9.75679	9.82137
THC0290_0444	537060	539312	1		THC0290_v2_0461		Probable outer membrane protein precursor	2253	1	THC0290_N_0322	THC0290_N_0322	7.61316	7.58254	7.38787	7.14422	6.90615	7.34758	6.80519	7.60492	6.46143	6.73552	7.58988	7.44072	5.91853	7.2427	6.41727	6.28131	3.92477	4.61113	6.72349	7.10383	7.84737	8.09694	7.47539	7.73897	7.83631	8.15993	7.8533	8.05432	7.52601	7.47539	7.30655	7.17196	6.43402	6.93011	7.00701	7.22535	7.66055	7.71176
THC0290_0445	539315	541585	-1		THC0290_v2_0462		Probable Na+/H+ antiporter	2271	1	THC0290_N_0323	THC0290_N_0323	9.14807	8.99152	9.27554	9.08956	9.28743	9.71576	9.41112	9.87441	9.67018	9.8701	9.22715	9.1342	9.95939	9.85665	9.29315	9.34326	9.65714	9.6766	10.0108	9.85665	9.10498	9.10166	9.475	9.40008	9.37064	9.30281	8.65311	8.51714	9.11073	9.18399	9.01591	9.00089	9.15163	9.16902	9.14552	9.34326	8.93212	9.29857
THC0290_0456	553650	554273	-1		THC0290_v2_0473		Putative sensor (PAS) domain for methyl-accepting chemotaxis sensory transducer	624	1	THC0290_N_0328	THC0290_N_0328	10.5339	10.9532	11.1697	11.0596	9.89286	10.2044	8.39165	9.34864	7.68329	8.27268	11.218	11.4843	10.3385	9.94947	10.4431	10.9062	8.46892	9.09542	9.23862	10.8301	10.6217	10.8361	10.6381	10.0018	10.7313	10.6605	11.6541	11.5487	11.18	11.6801	11.1183	11.1162	9.99604	10.2961	10.9532	11.1739	10.5737	11.042
THC0290_0466	563559	564167	1		THC0290_v2_0485		Putative pyridine nucleotide-disulphide oxidoreductase, class-II family protein	609	1	THC0290_N_0335	THC0290_N_0335	10.8501	10.7949	10.5843	10.9757	11.1286	10.9238	11.3261	11.482	11.5624	11.1873	10.5903	10.5003	12.9486	13.61	12.7041	12.3251	13.2868	13.0714	12.7945	13.422	10.7731	10.9212	10.8564	10.8803	10.9867	10.8277	10.6758	10.9367	11.2635	11.5997	10.5547	10.7161	10.8947	11.0767	10.7204	10.6217	10.9657	10.8238
THC0290_0467	564213	565787	-1		THC0290_v2_0486		Probable membrane associated S41A family C-terminal processing peptidase	1575	1	THC0290_N_0336	THC0290_N_0336	9.33008	9.33008	9.1431	8.8394	8.22154	8.21199	7.84737	6.94168	7.58254	8.00132	9.28743	9.16622	8.11531	7.93025	7.8161	7.63232	7.79742	8.00646	8.05962	7.45887	9.46682	9.30281	9.30565	9.63436	9.16039	9.64067	8.80602	8.59754	9.51336	9.05868	9.00979	9.02912	8.11531	7.9112	8.93212	9.07941	9.31822	9.51336
THC0290_0470	567208	567639	1		THC0290_v2_0489		Protein of unknown function	432	1	THC0290_N_0339	THC0290_N_0339	10.9192	10.7965	10.8985	11.011	11.237	12.2847	11.82	13.6377	12.4112	12.8482	10.9702	10.8907	14.9019	14.4299	13.3086	13.2374	15.2251	15.5273	15.502	15.4393	10.5218	11.3328	11.0723	11.2004	11.4565	11.18	11.0353	11.2416	11.2986	11.8153	10.908	10.7965	11.2943	11.3168	10.7552	10.8842	10.8926	11.6955
THC0290_0499	604918	605220	1		NA		Hypothetical protein	303	2	THC0290_N_0360	THC0290_N_0360;THC0290_N_0361	4.57225	3.90824	4.21208	4.00702	4.21208	4.38349	3.9395	6.33213	5.6804	4.7735	4.19131	4.10684	3.95849	6.72349	5.22358	4.94394	4.10684	4.0528	6.1785	9.54329	4.03561	4.41087	4.52789	4.19131	4.14146	4.12661	4.06743	4.10684	4.08251	4.10684	4.12661	4.61113	4.00702	4.1718	4.61113	4.52789	4.41087	4.94394
THC0290_0552	673195	673554	1		NA		Hypothetical protein	360	1	THC0290_N_0398	THC0290_N_0398	3.90824	3.89734	3.93068	4.0528	4.19131	3.98674	4.00702	8.27268	3.99669	4.86015	3.96838	3.95219	6.36338	3.87282	3.89734	4.0528	8.16952	3.93068	5.76587	7.25127	4.12661	3.88664	3.92477	3.90824	3.93068	3.97916	3.96838	4.1718	3.87282	3.97916	3.94588	3.90824	3.97916	3.9395	4.10684	4.03561	4.02749	4.48766
THC0290_0565	687769	689262	-1		THC0290_v2_0603		Protein of unknown function, putative reverse transcriptase (RNA-dependent DNA polymerase)	1494	1	THC0290_N_0407	THC0290_N_0407	7.87726	7.96906	7.46743	7.44072	7.32161	7.23499	7.27095	8.03886	6.75114	7.5655	7.64654	7.64654	8.56055	8.24476	8.13985	8.06998	7.27986	7.00701	7.79742	7.14422	7.96906	7.94046	7.82336	8.06998	7.86535	7.83631	7.27095	7.29881	7.44072	7.432	7.5655	7.58254	7.66055	7.63232	7.62336	7.46743	7.70549	7.66871
THC0290_0581	707782	708492	1		THC0290_v2_0622		Protein of unknown function	711	1	THC0290_N_0423	THC0290_N_0423	8.62998	8.75527	9.91125	9.9576	10.4388	10.3527	10.6534	11.366	11.1595	11.1162	9.76871	9.93113	12.009	12.5081	11.6564	11.3728	11.8663	11.5896	11.4319	11.5355	8.52189	8.79116	8.28671	8.29241	8.23158	8.11974	9.66143	9.60601	10.6714	10.727	9.43713	9.21948	9.1547	8.92765	9.30565	9.12777	8.78242	8.87401
THC0290_0582	708481	710181	-1		THC0290_v2_0623		Protein of unknown function containing peptidoglycan binding domain	1701	2	THC0290_N_0425	THC0290_N_0424;THC0290_N_0425	8.90408	9.01591	9.86458	9.89076	10.7754	10.9888	11.0247	10.2667	10.424	10.801	9.76626	9.87889	10.6179	9.75679	10.826	10.711	10.4786	10.7029	10.402	10.0001	9.12777	8.64577	9.31523	9.38065	8.74735	9.03179	10.3096	10.1291	10.8698	10.6062	9.11927	9.20447	9.14807	9.35379	9.14016	9.25034	9.02224	8.96075
THC0290_0598	732558	734672	1		THC0290_v2_0643		Uncharacterized protein	2115	1	THC0290_N_0437	THC0290_N_0437	10.195	10.0001	9.72004	9.63436	9.33523	9.1431	9.18703	8.8496	9.10776	8.78686	9.80322	9.67456	8.32106	8.52189	8.21639	8.24476	8.86109	8.03264	6.93011	9.27817	9.9182	9.85665	10.0543	9.8524	10.1118	10.1471	9.37064	9.27292	9.69482	9.55105	9.82623	9.7356	9.20177	9.12551	9.79495	9.75172	9.95549	9.99793
THC0290_0599	735003	736340	-1		THC0290_v2_0644		Probable membrane fusion efflux protein	1338	1	THC0290_N_0438	THC0290_N_0438	11.8856	12.1154	12.272	12.2556	11.8328	12.009	11.6541	10.908	11.1653	11.2004	11.7384	11.7384	10.3406	10.1097	11.0596	11.1719	10.8926	10.809	10.4765	10.6315	12.1043	12.1498	11.9096	11.7619	11.8419	12.083	11.4685	11.3526	11.7832	11.7515	12.5081	12.4212	12.7041	12.6524	12.2982	12.4112	12.263	12.272
THC0290_0601	737937	739331	1		THC0290_v2_0646		Probable lipoprotein precursor	1395	1	THC0290_N_0440	THC0290_N_0440	8.56055	8.78242	8.70477	8.56504	8.85373	8.92416	8.57585	8.89532	9.20447	9.41633	8.66019	8.76354	9.7314	10.0226	8.71633	8.69686	10.4917	10.5737	10.3096	10.5218	8.93872	8.79908	8.77143	8.62998	8.54302	8.57585	8.72043	8.65311	8.68279	8.74291	8.64147	8.65311	8.16389	8.3288	8.86722	8.77143	8.87723	9.00375
THC0290_0602	739332	739574	-1		THC0290_v2_0647		Hypothetical transmembrane protein	243	1	THC0290_N_0441	THC0290_N_0441	10.351	10.4368	10.1747	10.351	10.943	11.0067	10.9801	12.5694	10.0869	9.97226	9.96205	9.99604	9.36283	8.83511	9.54872	9.7356	8.19676	9.05239	8.91061	9.49027	10.3425	10.5864	10.5339	10.6882	10.5529	10.5405	10.7731	10.9532	11.0639	11.1047	10.2281	10.254	10.7648	10.8677	10.3973	10.1139	10.416	10.5467
THC0290_0610	744842	745510	1		THC0290_v2_0655		Peptidase, M22 family	669	1	THC0290_N_0444	THC0290_N_0444	9.93843	10.1291	10.1118	10.1767	10.7904	10.3484	11.0556	11.3347	11.8419	11.6308	10.0869	10.1291	11.8486	11.8687	11.5236	11.4053	12.1069	11.9153	11.7159	11.8743	9.96599	10.3759	10.1661	10.2711	10.2347	9.89076	10.3077	10.5003	10.3634	10.6605	9.84288	9.67456	10.0479	10.1581	9.93346	9.79741	10.0941	10.1727
THC0290_0616	751461	752240	-1	murI	THC0290_v2_0662	murI	Glutamate racemase	780	1	THC0290_N_0447	THC0290_N_0447	9.67257	9.70863	9.58402	8.99756	8.87723	9.66765	9.00375	8.26367	9.1547	9.50334	9.69482	9.51086	9.81242	9.7287	8.86109	8.53447	10.226	10.1605	10.1035	10.6605	10.2646	9.09888	10.0226	10.0784	9.75432	10.2577	9.01591	8.57585	9.86054	9.06789	9.7402	10.0784	9.45937	9.18703	9.58124	10.131	10.1622	10.2734
THC0290_0625	760753	761388	-1		THC0290_v2_0671		Putative ABC-type transport system, ATPase component	636	2	THC0290_N_0453	THC0290_N_0453;THC0290_N_0454	7.40732	7.62336	7.77789	7.89454	7.80465	7.92363	7.5655	8.14417	7.29881	7.33843	7.85926	7.93562	7.00701	7.08043	7.63914	7.08043	6.85235	5.98472	7.63232	6.38205	7.19717	7.50823	7.78485	7.32161	7.74551	7.70549	7.69131	7.51675	7.09383	7.38787	7.47539	7.62336	7.38181	7.9459	7.73897	7.45887	7.34758	7.72569
THC0290_0631	766042	767274	1	clpX	THC0290_v2_0677	clpX	S14 family, ATP-dependent Clp protease ATP-binding subunit	1233	1	THC0290_N_0460	THC0290_N_0460	13.328	13.2618	13.1704	13.2077	13.0771	13.1294	13.041	12.6086	12.1122	11.8882	13.268	13.2748	11.5581	11.1086	11.8715	11.9182	11.092	11.2554	10.9103	10.5447	13.4354	13.3086	13.6475	13.7785	13.5762	13.727	12.9719	13.0305	12.7844	12.6368	12.9771	13.0146	12.8291	12.8206	12.9771	13.066	13.268	13.1704
THC0290_0633	767874	768443	1		THC0290_v2_0679		Probable membrane-associated phospholipid phosphatase	570	1	THC0290_N_0462	THC0290_N_0462	10.6157	10.2598	9.59155	9.84723	9.77495	9.88818	10.1581	12.4447	9.9182	9.83189	9.89785	9.7223	11.3347	11.6258	10.727	10.5588	11.1653	11.1873	10.6515	10.7369	10.6605	11.0353	10.6276	10.928	10.8803	11.2134	10.3185	10.3484	10.7161	11.0876	9.58402	9.93843	9.32411	9.65489	9.66143	9.87663	10.3298	10.4408
THC0290_0634	768501	769142	-1		THC0290_v2_0680		O-methyltransferase	642	2	THC0290_N_0463	THC0290_N_0463;THC0290_N_0464	9.07104	9.24185	9.03442	9.25349	9.84288	9.85867	10.2481	11.0353	11.0657	10.8543	9.01289	9.08704	10.1854	10.5608	10.0869	10.0226	10.4828	10.58	10.4431	10.7125	9.10776	8.99152	9.13055	8.92416	9.11623	8.86722	9.59682	9.7223	9.24185	9.3878	9.24185	9.04353	9.43981	9.56163	9.25349	9.1342	9.27292	9.15163
THC0290_0636	770321	771202	-1		THC0290_v2_0682		Probable lipoprotein precursor	882	1	THC0290_N_0465	THC0290_N_0465	7.5655	7.75698	9.29315	9.54557	10.6556	10.7438	10.9062	10.351	13.1839	12.4418	8.91722	9.15798	12.5957	12.7716	12.9531	12.9194	13.8113	13.8483	15.0686	14.7661	7.40732	7.25127	6.8285	6.53405	6.53405	6.50603	8.95198	9.1547	9.22192	9.14016	8.31595	8.37886	9.13055	8.98525	8.2533	8.23158	7.9459	7.91755
THC0290_0643	777763	779748	1	dnaG	THC0290_v2_0689	dnaG	DNA primase	1986	1	THC0290_N_0467	THC0290_N_0467	9.86766	9.79495	9.2328	9.16328	8.43656	8.30588	8.29241	8.57303	8.92058	8.80602	9.7287	9.55105	8.23158	8.28671	7.97392	8.19676	8.40046	7.69814	6.91981	9.14807	9.91603	9.93346	10.2869	10.0828	10.1767	10.0337	8.90107	9.06219	9.87441	9.92497	9.59155	9.49336	9.20447	8.84252	9.57625	9.58662	9.70404	9.81718
THC0290_0644	779789	780418	-1		THC0290_v2_0690		Two-component system response regulatory protein, LuxR family	630	1	THC0290_N_0468	THC0290_N_0468	8.02785	8.04452	8.98525	9.43407	11.3469	11.4111	11.9431	12.8888	13.5543	13.5043	8.67507	8.79549	13.8853	13.7521	13.422	13.4407	13.5633	13.9653	14.3087	13.8853	8.03264	8.14923	7.93562	7.87726	8.19676	8.00646	9.81242	9.7993	9.27554	9.41633	8.53888	8.5518	8.53012	8.38295	8.4057	8.38295	8.13985	8.27268
THC0290_0655	789828	791057	1	mraY	THC0290_v2_0701	mraY	Phospho-N-acetylmuramoyl-pentapeptide-transferase	1230	1	THC0290_N_0475	THC0290_N_0475	11.621	11.4458	11.1183	11.2574	11.8486	11.2295	12.0808	11.3508	11.7937	11.6191	11.1206	11.0291	10.759	10.6735	11.2474	11.3963	10.8582	10.5818	10.3527	10.3406	11.2655	11.2793	11.4458	11.6191	11.4664	11.427	11.09	11.1138	11.3824	11.3508	11.3238	11.1004	11.546	11.5624	11.3617	11.155	11.3889	11.1571
THC0290_0664	801393	802211	1		THC0290_v2_0710		Probable transmembrane protein of unknown function	819	1	THC0290_N_0483	THC0290_N_0483	9.25561	8.87401	8.28212	8.32501	8.65628	9.05868	8.89532	9.7287	7.86535	7.9112	8.51714	8.44026	7.76329	7.23499	7.94046	7.95049	4.29117	7.8161	3.89734	5.73754	9.11623	9.68557	8.56504	9.03442	8.75948	9.30093	8.59754	8.61787	8.83511	9.03741	8.29241	8.37169	8.45306	8.5518	8.16389	8.41061	9.03741	8.79116
THC0290_0665	802200	802859	-1	rpe	THC0290_v2_0711	rpe	Ribulose-phosphate 3-epimerase	660	1	THC0290_N_0484	THC0290_N_0484	11.6625	11.7859	11.6657	11.5005	11.3304	11.7438	11.5806	10.192	11.8987	11.7489	11.7619	11.42	11.768	11.6657	11.3215	10.9702	11.9606	11.9431	11.5581	11.6386	12.0319	11.1388	12.0719	11.8018	11.7859	12.075	11.2838	10.9822	11.4416	10.8346	12.2204	12.2271	11.859	11.5533	12.1687	12.366	12.2788	12.1977
THC0290_0691	825894	826751	1	hemK	THC0290_v2_0738	hemK	Methylase of polypeptide chain release factors	858	1	THC0290_N_0500	THC0290_N_0500	8.94599	8.88107	8.81362	8.81362	8.61446	8.37886	8.10331	8.36699	8.89134	8.70093	9.07388	9.04353	8.43656	9.13735	8.46892	8.50816	8.24059	7.82336	8.07588	7.84076	8.87079	8.8394	9.19255	9.14807	9.12551	8.93872	8.59343	8.47284	8.58442	8.65311	8.70477	8.69372	8.67507	8.57303	8.70841	8.63397	8.77143	8.64577
THC0290_0693	828327	829745	1	hisS	THC0290_v2_0740	hisS	Histidine--tRNA ligase	1419	1	THC0290_N_0502	THC0290_N_0502	10.6758	10.7182	10.763	10.6735	11.2812	11.2922	11.4799	11.1761	11.8441	11.5005	10.7949	10.8965	11.4458	11.3284	11.5215	11.2227	11.5215	11.1286	11.0767	11.4938	10.8524	10.7349	10.9492	10.8322	10.6714	10.9062	11.0374	11.0189	10.8524	10.7513	10.7291	10.7648	11.18	11.0723	10.759	10.7465	10.711	10.496
THC0290_0694	829842	830741	-1	xerD	THC0290_v2_0741	xerD	Tyrosine recombinase XerD	900	1	THC0290_N_0503	THC0290_N_0503	9.28492	9.39511	9.12274	9.11073	9.20447	9.36283	9.43407	8.95499	10.0063	10.2234	9.31294	9.15163	10.1229	10.0271	9.54112	9.46682	10.0591	10.0591	8.88719	9.87889	9.40568	9.33265	9.08478	9.25034	8.94599	9.41358	9.2959	9.21049	9.35925	9.2959	9.45468	9.40267	9.77954	9.57888	9.38065	9.35122	9.46906	9.33793
THC0290_0707	844456	845016	1		THC0290_v2_0755		Putative transcriptional regulator	561	1	THC0290_N_0516	THC0290_N_0516	10.9062	11.0619	11.9769	11.8018	12.2556	12.2375	12.1334	12.7294	13.05	12.8673	11.8103	11.9795	13.4282	13.9027	12.8291	12.7246	14.4025	14.3289	14.3289	14.6911	10.7949	11.3387	11.0312	10.4742	10.7965	10.7465	11.4543	11.6879	11.4009	11.6334	11.6704	11.4391	12.2982	12.234	11.5377	11.3867	11.2594	11.0479
THC0290_0708	845013	845807	-1		THC0290_v2_0756		Branched-chain amino acid aminotransferase/4-amino-4-deoxychorismate lyase family protein	795	1	THC0290_N_0517	THC0290_N_0517	11.5946	11.5377	11.4073	11.3889	11.0657	11.1138	10.5484	11.9043	11.18	10.5864	11.5215	11.6486	10.6648	10.7204	10.3736	10.2961	10.2133	10.1097	10.2692	9.95122	11.5672	11.8441	11.5603	11.6285	11.6486	11.6357	11.1873	11.4223	10.9928	11.0479	11.2838	11.3304	10.3715	10.6109	11.2922	11.3469	11.6729	11.6583
THC0290_0718	855109	855891	1		THC0290_v2_0767		Probable ABC-type iron(III)-transport system, ATPase component	783	1	THC0290_N_0524	THC0290_N_0524	9.79495	9.51849	9.46906	9.43981	9.14016	9.30824	8.64953	8.13012	7.07162	7.36407	9.83567	9.6815	7.40732	7.57321	6.80519	6.89207	5.10976	8.25914	7.71855	8.13012	9.99156	9.83811	8.8575	8.94599	8.70093	9.29315	9.72412	9.53319	10.0849	9.697	9.47742	9.89785	8.51714	8.80221	9.36828	9.84723	9.8524	9.4314
THC0290_0724	859337	860293	-1	irk	THC0290_v2_0773	irk	Inward rectifier potassium channel Irk	957	1	THC0290_N_0525	THC0290_N_0525	8.18021	8.18646	8.22667	8.24882	8.45306	8.53888	8.96374	8.7117	10.0127	9.66572	8.21639	8.15993	9.52558	9.87889	8.9423	8.86722	9.97002	9.81488	10.2347	10.9173	8.04979	8.13985	8.18021	8.35302	8.14417	7.95049	8.06537	7.89454	7.88357	8.00646	8.13985	8.08473	8.86397	8.96075	8.1902	8.21199	8.11974	8.18646
THC0290_0744	883754	884800	1	fjo30	THC0290_v2_0796	fjo30	Glycine/D-amino acid oxidases (deaminating) family protein Fjo30	1047	1	THC0290_N_0542	THC0290_N_0542	9.33793	9.28131	8.86397	8.82446	8.82798	9.02577	9.01883	9.6388	9.08478	8.99152	8.91384	8.9423	9.00726	8.92765	8.53447	8.29241	8.86722	8.77776	8.36699	7.42371	9.47742	9.58909	9.01289	9.2444	8.97896	9.26691	9.20447	9.09542	9.76871	9.60601	8.99386	9.25349	8.50816	8.34234	8.94918	9.06219	9.23862	9.1957
THC0290_0746	885447	887357	1		THC0290_v2_0799		Probably involved in regulation of translation initiation	1911	1	THC0290_N_0544	THC0290_N_0544	11.3149	11.0312	10.0293	9.96786	9.25843	9.11927	9.28743	9.16328	9.48519	9.38538	10.1164	9.93594	9.33523	9.16039	9.12777	9.23862	9.77097	9.25034	9.43981	9.82623	11.2055	11.0171	11.6258	11.736	11.4543	11.8441	9.93843	9.80548	10.5023	10.2481	10.6217	10.6964	9.78163	9.69923	10.6836	10.6276	10.8759	10.7816
THC0290_0747	887640	888794	-1		THC0290_v2_0800		Protein of unknown function	1155	1	THC0290_N_0545	THC0290_N_0545	10.1471	10.0744	9.43981	9.48519	8.76354	8.77776	8.47284	9.35379	7.32161	7.00701	9.52558	9.41112	6.13987	6.68579	5.56814	6.63028	6.26409	6.24775	7.48468	4.01937	9.94516	10.3652	10.4084	10.5923	10.4141	10.7858	9.04655	9.25349	9.30565	9.65489	9.60365	9.50883	8.97553	9.01591	9.58662	9.40905	10.197	10.0293
THC0290_0748	889267	890505	1		THC0290_v2_0801		Probable type II cytosine-specific modification methyltransferase	1239	1	THC0290_N_0547	THC0290_N_0547	10.8781	10.8582	10.457	10.5737	10.5608	10.5923	10.7204	10.7291	11.6432	11.6755	10.6427	10.6648	11.9823	12.7246	11.736	11.6657	11.9642	11.9182	11.5148	11.8715	10.8382	11.0701	11.0025	10.9492	11.1428	10.7904	10.5716	10.7291	11.2495	11.5781	10.9173	10.8501	10.9681	10.9867	10.9552	10.8154	10.9192	10.9985
THC0290_0749	890481	891245	-1		THC0290_v2_0802		Probable type II restriction enzyme	765	1	THC0290_N_0548	THC0290_N_0548	9.77954	9.68557	9.45023	9.54329	9.50092	9.40568	9.32411	10.1471	9.4798	9.50595	9.40267	9.48806	8.75948	8.39165	8.70477	8.86397	9.24185	8.52189	8.87401	8.44026	9.71328	9.66143	9.54557	9.6502	9.46417	9.37064	9.46417	9.52558	8.83225	8.89853	9.51086	9.59682	8.60516	8.72459	9.475	9.53859	9.51849	9.38319
THC0290_0755	900063	900389	-1		THC0290_v2_0809		Protein of unknown function	327	1	THC0290_N_0555	THC0290_N_0555	6.53405	6.41727	6.2285	6.13987	6.24775	6.29868	6.13987	7.63232	6.16079	5.8428	5.96334	6.47655	6.81712	6.76253	4.61113	5.18467	6.43402	6.07545	8.16952	6.21305	6.09763	6.71302	6.3156	6.26409	6.24775	6.53405	6.46143	6.28131	6.46143	6.95491	6.11988	6.09763	5.63371	5.86835	6.46143	6.09763	6.44732	6.49242
THC0290_0759	904813	906567	1	phhA	THC0290_v2_0814	phhA	Phenylalanine 4-monooxygenase	1755	1	THC0290_N_0558	THC0290_N_0558	11.3867	11.3915	11.9518	11.7964	12.1498	12.1466	12.1687	11.6657	12.2875	12.0149	12.0344	12.1154	11.7336	11.5923	11.7189	11.768	11.4458	11.5877	11.6704	11.5672	11.4758	11.2594	11.4416	11.2616	11.4435	11.0939	11.9576	11.9576	11.5487	11.5355	11.7489	11.8486	12.3084	12.1947	11.6334	11.6191	11.5487	11.3489
THC0290_0760	906571	907191	-1		THC0290_v2_0815		Protein of unknown function	621	1	THC0290_N_0559	THC0290_N_0559	9.09542	9.12551	9.18703	9.16039	8.93872	8.79908	8.26367	8.98525	8.49708	8.90107	9.06219	9.25843	9.1547	9.19255	8.30124	8.14923	9.21049	9.56163	9.35925	8.97258	9.21948	9.31294	9.48806	9.06789	9.14807	9.16328	8.7117	8.82108	9.19255	9.21681	9.13055	9.10498	8.34234	8.41431	9.39759	9.04655	9.06219	9.27817
THC0290_0761	907194	908144	-1		THC0290_v2_0816		Protein of unknown function	951	1	THC0290_N_0560	THC0290_N_0560	8.45658	8.64953	8.40046	8.39614	8.31595	8.59343	8.30588	9.18703	8.78242	8.61787	8.32501	8.37545	9.16902	8.67507	7.67633	7.78485	7.33843	8.48874	7.28941	4.34892	8.64147	8.60516	8.62998	8.79908	8.62129	8.77143	8.46892	8.5013	8.93212	8.77485	8.79549	8.42782	8.37169	8.31595	8.61446	8.4057	8.70477	8.62601
THC0290_0780	929172	929987	1		THC0290_v2_0834		Probable acyltransferase	816	1	THC0290_N_0575	THC0290_N_0575	10.7438	10.6819	10.3803	10.4222	10.6236	10.9006	10.9928	10.8424	10.5003	10.9613	10.658	10.5447	11.237	11.2884	11.1248	11.0132	11.4543	11.3328	11.3086	11.1977	10.8174	10.8739	10.6819	10.7925	10.496	10.6341	10.9909	10.8441	10.7796	10.7438	10.7029	10.5089	10.8865	10.9657	10.5405	10.7051	10.658	10.7349
THC0290_0792	942315	943517	1		THC0290_v2_0846		Transposase IS256 family	1203	1	THC0290_N_0582	THC0290_N_0582	11.3005	11.2677	10.9741	10.8965	10.3207	10.3018	9.83375	10.4345	10.0565	10.0085	11.2159	11.3104	10.5959	10.5447	10.2711	10.1811	10.4298	10.6556	10.8238	11.3598	11.4499	11.4111	11.0767	11.0463	11.147	11.0827	10.7513	10.7125	11.7281	11.8801	10.8198	11.1616	10.485	10.594	11.0247	11.1326	11.232	11.5896
THC0290_0800	954369	955730	-1		THC0290_v2_0854		Probable DNA polymerase III subunit	1362	1	THC0290_N_0588	THC0290_N_0588	10.7513	10.6919	10.412	10.2461	10.0565	10.58	10.4765	9.95549	10.2624	10.153	10.5233	10.4786	10.0201	9.79741	10.1059	10.0565	10.0085	10.0922	9.63436	9.53086	10.8543	10.4282	10.3363	10.5843	10.3258	10.5108	10.598	10.487	10.5885	9.96599	10.5677	10.6341	10.6315	10.5885	10.3207	10.6062	10.6515	10.5023
THC0290_0809	964041	965519	1		THC0290_v2_0863		Probable sugar O-acetyltransferase	1479	1	THC0290_N_0593	THC0290_N_0593	9.46218	9.33265	8.76354	8.88107	9.34562	9.4798	9.7223	9.46417	9.8447	9.80134	8.97258	8.70841	8.96075	8.90107	9.51849	9.72635	9.54557	9.00375	9.4232	9.40905	9.33008	9.52799	9.33793	9.36828	9.51336	9.25843	9.1957	9.25034	10.6758	10.9681	8.79908	8.86397	8.49259	8.66019	9.04041	8.8394	9.36283	9.57112
THC0290_0810	965500	966744	-1		THC0290_v2_0864		Protein of unknown function	1245	1	THC0290_N_0594	THC0290_N_0594	8.06537	8.15993	8.28671	8.00646	8.48494	8.82446	8.69686	8.75527	9.48806	9.64067	8.46892	8.22154	10.0148	9.91603	8.98525	8.97896	8.75178	9.19255	9.21948	9.01591	8.05432	8.27268	8.13012	8.06537	7.79742	8.21199	8.22667	8.17486	7.84076	7.89979	8.37545	8.30588	7.88357	7.69814	8.31048	8.30124	8.00646	8.39614
THC0290_0819	975646	977562	-1		THC0290_v2_0874		LysM domain protein precursor	1917	1	THC0290_N_0601	THC0290_N_0601	10.1605	10.2436	10.4511	10.3077	9.7611	10.0381	9.80134	9.72412	8.68279	9.14552	10.5132	10.496	9.91371	9.45937	10.1661	10.1208	9.6766	10.3059	10.5959	9.26413	10.4141	9.8701	10.3634	10.6627	10.2502	10.3954	9.92723	9.75172	11.7189	11.3149	10.036	10.2711	9.86766	9.84031	10.0807	10.3278	10.3207	10.2213
THC0290_0837	996345	997619	-1	wzxE	THC0290_v2_0894	wzxE	Putative lipopolysaccharide biosynthesis protein WzxE	1275	1	THC0290_N_0615	THC0290_N_0615	8.18646	8.21199	7.21628	7.10383	6.8285	6.83835	6.63028	8.28671	6.68579	5.46069	7.84737	7.47539	4.12661	3.88664	5.29545	5.6804	4.01937	4.98805	7.75698	8.79116	7.72569	8.17486	7.17196	7.46743	7.66055	7.84737	7.45887	7.50823	9.18399	9.38538	7.53385	7.50823	7.27986	7.15444	7.29881	7.47539	8.05962	8.16389
THC0290_0838	997620	998723	-1		THC0290_v2_0895		Probable aminotransferase involved in lipopolysaccharide biosynthesis	1104	1	THC0290_N_0615	THC0290_N_0615	10.0018	10.1727	9.57888	9.46218	9.03442	8.86109	8.70093	8.73578	8.02785	7.84737	9.88818	9.94516	8.14417	8.4769	8.43288	8.2533	8.27761	8.14417	8.73926	9.88578	10.1811	10.0744	9.57112	9.75911	9.6815	9.85867	9.50092	9.60132	11.0723	11.0067	9.8447	9.72004	9.54329	9.46417	9.69273	9.71328	10.052	9.92037
THC0290_0843	1004237	1005373	-1	wbsE	THC0290_v2_0900	wbsE	Putative glycosyl transferase WbsE	1137	1	THC0290_N_0617	THC0290_N_0617	8.08006	8.22154	7.71855	7.69131	7.14422	7.20629	6.77671	7.66871	8.06537	8.37169	7.75698	7.8161	8.35741	8.73926	7.33843	7.50097	8.92058	9.14807	8.36212	9.84288	7.87124	8.00646	7.90465	7.50823	7.5655	7.55797	7.46743	7.49272	7.1884	7.48468	7.74551	7.63914	7.00701	6.95491	7.8533	7.87124	7.86535	8.06998
THC0290_0846	1006906	1007832	-1		THC0290_v2_0903		Glycosyl transferase, group 2 family protein	927	1	THC0290_N_0618	THC0290_N_0618	8.4769	8.46892	8.11974	7.98593	7.50097	7.71176	6.98599	8.64953	7.30655	7.82336	8.13012	8.31595	8.47284	8.2533	7.70549	8.04452	7.22535	8.03886	8.27268	8.94599	8.41431	8.58442	7.94046	8.05432	8.30124	7.97392	8.27761	8.20194	8.03886	8.43288	8.18021	8.15993	7.40732	7.54964	8.30588	8.34234	8.56504	8.64147
THC0290_0850	1009520	1009939	-1	yjeB	THC0290_v2_0906	yjeB	Protein of unknown function YjeB	420	1	THC0290_N_0619	THC0290_N_0619	7.64654	7.55797	7.14422	7.07162	6.69899	6.75114	6.07545	6.79159	7.26049	7.20629	7.21628	7.12586	8.62601	9.21382	7.14422	6.69899	8.82798	8.75948	8.44854	6.6599	7.80947	7.72569	7.95753	7.49272	7.89979	7.64654	7.19717	6.99509	6.58879	6.89207	7.20629	7.38787	6.09763	6.21305	7.31401	7.38787	7.38787	7.3982
THC0290_0855	1014075	1016525	1	priA	THC0290_v2_0911	priA	Primosomal protein N'	2451	1	THC0290_N_0621	THC0290_N_0621	10.7695	10.6464	10.7925	11.0272	10.7086	10.6315	10.3993	9.37541	9.54329	9.29315	11.0312	10.9967	9.16039	9.12551	9.97002	9.7836	9.23862	8.87079	7.12586	7.38787	10.4511	10.532	10.4042	10.2981	10.5108	10.3425	10.3634	10.5677	10.5339	10.5156	10.485	10.6062	10.8322	10.727	10.4828	10.6179	10.763	10.53
THC0290_0856	1016592	1017284	-1		THC0290_v2_0912		Two-component system response regulatory protein, LytTR family	693	1	THC0290_N_0622	THC0290_N_0622	10.1509	10.0271	11.155	11.0209	11.6231	11.8801	11.5083	12.656	11.8905	11.9823	11.1635	11.3489	13.2077	13.5699	12.3892	12.1947	14.2737	14.3903	13.5191	14.3767	9.59682	10.2461	9.71782	9.45693	9.52799	9.40267	11.2574	11.3304	11.042	11.1183	10.5588	10.4609	11.2273	11.366	10.6859	10.424	9.71782	10.0226
THC0290_0884	1041028	1041660	-1		THC0290_v2_0942		Hypothetical lipoprotein precursor	633	1	THC0290_N_0635	THC0290_N_0635	9.19255	9.14807	8.90734	9.10776	9.32729	9.18963	9.33265	10.6939	9.82137	9.9407	8.95499	8.91061	10.2937	10.9467	10.2347	10.2281	11.0939	10.6758	10.9125	11.486	9.22966	8.8575	8.99756	8.87079	9.21948	8.72459	9.17252	9.4314	10.487	10.5923	8.78242	9.05868	9.07104	9.04655	8.96922	9.01289	9.27817	8.92416
THC0290_0887	1044296	1045162	1	mvaB	THC0290_v2_0945	mvaB	Hydroxymethylglutaryl-CoA lyase	867	1	THC0290_N_0637	THC0290_N_0637	11.7591	11.7748	11.9679	11.7438	11.5397	11.8251	11.6486	9.77495	10.6489	10.759	11.8987	11.5123	11.3451	10.6714	10.9148	10.6405	10.8238	10.9593	9.90934	9.57888	11.7515	11.3802	11.3261	11.366	11.0374	11.3571	11.8801	11.7515	11.9679	11.5923	11.8103	11.8516	11.3571	11.3728	11.7438	11.8124	11.8486	11.8441
THC0290_0938	1105425	1106162	1	aroE	THC0290_v2_0999	aroE	Shikimate dehydrogenase	738	1	THC0290_N_0668	THC0290_N_0668	11.269	11.232	10.759	10.6859	10.5258	10.6797	10.3736	10.9062	9.57355	9.69923	10.9867	10.8198	10.3317	10.0381	10.4609	10.6131	10.2667	10.2417	11.2864	11.4685	11.3508	11.3824	10.5447	10.5677	10.4042	10.3671	11.2348	11.3451	12.1851	12.1887	10.8698	10.9757	10.6964	10.7949	11.0047	10.9928	11.2533	11.2474
THC0290_0939	1106178	1107122	-1	rlmF	THC0290_v2_1000	rlmF	Ribosomal RNA large subunit methyltransferase F	945	1	THC0290_N_0669	THC0290_N_0669	9.92497	10.0764	9.96599	9.73333	9.34864	9.56811	9.34864	8.98189	9.42542	9.60883	9.72412	9.86263	9.28996	9.35379	8.76354	8.65628	10.1013	9.99384	8.89134	9.52799	9.94947	9.92497	10.3096	10.3545	10.4084	10.7291	9.58124	9.57355	9.20776	9.11344	9.7836	9.95939	8.82446	8.67185	9.7017	9.93113	9.76871	9.94516
THC0290_0942	1110287	1112887	1	clpB	THC0290_v2_1003	clpB	ATPase with chaperone activity ATP-binding subunit	2601	1	THC0290_N_0670	THC0290_N_0670	11.8612	11.7189	11.6432	11.8302	11.2513	10.7571	13.05	12.9343	12.8163	12.8382	11.5148	11.3328	14.883	15.3069	15.1663	14.9443	14.5173	14.2858	13.1188	12.2875	11.4953	11.3941	11.5417	11.2348	11.6541	11.3778	12.2982	12.538	10.8361	11.0539	11.5696	11.544	13.0771	12.8086	11.5696	11.3684	10.9702	10.9393
THC0290_0946	1118401	1120014	1	pafA	THC0290_v2_1007	pafA	Alkaline phosphatase precursor	1614	1	THC0290_N_0675	THC0290_N_0675	10.8048	11.1304	11.2416	11.3168	11.838	11.7462	11.2793	11.7591	11.5696	11.5715	11.147	11.3547	11.1266	10.9928	10.9843	11.0876	11.0498	11.4591	11.3149	10.9238	10.8759	11.1225	10.9062	10.8483	11.1409	11.1616	11.5581	11.5896	10.9552	11.0985	11.3405	11.147	10.418	10.402	11.2227	11.2437	10.9572	11.1409
THC0290_0947	1120307	1120960	-1		THC0290_v2_1008		Protein of unknown function precursor	654	1	THC0290_N_0676	THC0290_N_0676	8.20194	8.08473	8.505	8.56865	9.42542	9.57888	9.77711	10.9411	10.5405	10.5405	8.53888	8.59754	11.1834	11.4714	10.7925	10.7608	10.7051	10.7369	10.9148	11.3261	8.22154	8.43288	8.27268	8.21639	8.13533	8.4057	9.13735	9.44755	8.57303	8.98525	8.18646	8.36212	9.32102	9.18963	8.25914	8.32106	8.08006	8.03264
THC0290_0963	1133645	1134355	1		THC0290_v2_1023		Putative dinucleotide-utilizing enzyme involved in molybdopterin and thiamine biosynthesis	711	1	THC0290_N_0687	THC0290_N_0687	9.89549	9.85461	9.62292	9.70863	10.3317	10.2068	10.7369	10.9238	11.3387	11.092	9.35925	9.36566	10.1989	10.1581	10.6882	10.6534	10.6361	10.383	10.8722	11.0312	9.7356	9.69923	9.37778	9.44755	9.55902	9.34326	10.351	10.4765	9.75911	10.0702	9.86263	9.62512	10.1139	10.1831	9.92271	9.67942	9.79741	10.025
THC0290_0964	1134363	1135391	-1		THC0290_v2_1024		Protein of unknown function precursor	1029	1	THC0290_N_0688	THC0290_N_0688	9.85867	9.98647	10.3059	10.3038	10.6714	11.0247	10.5529	11.4617	10.9192	10.7313	10.1622	10.2519	10.4532	10.1727	9.94947	10.2624	10.9867	11.1719	11.3848	11.1781	9.79741	10.0897	10.2115	10.1013	10.1896	10.1811	10.5608	10.3993	10.1013	10.1661	10.068	10.004	10.4493	10.3736	10.0897	10.2234	9.87441	10.125
THC0290_0966	1135889	1136275	1		THC0290_v2_1026		Protein of unknown function	387	1	THC0290_N_0689	THC0290_N_0689	6.56314	6.89207	6.97864	6.6599	6.75114	6.73552	6.72349	7.76329	8.05962	7.41445	6.8775	6.68579	8.19676	8.23158	6.63028	7.38181	9.02577	9.7402	9.7836	9.45023	6.39928	7.13339	6.76253	6.69899	7.02551	6.93011	6.67062	6.33213	6.33213	7.11504	6.79159	7.1884	6.93011	6.33213	6.60195	6.93011	6.76253	7.10383
THC0290_0970	1138817	1139758	-1	oxyR	THC0290_v2_1030	oxyR	Redox-sensitive transcriptional activator OxyR	942	1	THC0290_N_0692	THC0290_N_0692	8.82108	8.91061	8.6785	8.69046	8.79549	8.90734	9.11073	9.44755	9.3878	9.18703	8.56055	8.6785	9.07688	7.9112	8.56865	8.48093	9.70404	9.61853	9.85867	9.42089	8.92058	8.9423	8.83225	9.1342	9.03179	9.39759	8.95499	8.88414	9.13735	9.09248	8.96374	8.7117	10.0183	9.87201	8.80221	8.76354	8.94918	8.88719
THC0290_0982	1153638	1155428	-1		THC0290_v2_1043		Acyl-CoA dehydrogenase family protein	1791	1	THC0290_N_0701	THC0290_N_0701	12.06	11.8952	11.6308	11.6755	10.711	10.5447	10.3527	9.86458	11.1409	10.8219	11.9458	11.8227	10.6534	10.8135	11.147	11.1206	10.3652	10.226	10.6919	10.7008	11.7619	11.4685	11.9043	11.5647	11.9487	11.6827	11.2094	11.5355	11.7697	11.8486	11.3328	11.5781	11.6044	11.5581	11.6432	11.6855	11.7619	11.6285
THC0290_1037	1213924	1214790	1	fjo11	THC0290_v2_1100	fjo11	Probable transmembrane protein of unknown function Fjo11	867	1	THC0290_N_0735	THC0290_N_0735	7.79742	7.65426	7.54964	7.3982	7.20629	7.53385	7.32161	8.57585	7.87124	7.95753	7.46743	7.29881	7.73897	7.32161	7.27095	7.3982	8.35302	8.31595	8.79908	9.38065	7.54964	7.80947	8.04452	8.21199	8.25914	8.03264	7.10383	7.01765	7.08043	7.1798	7.73254	7.54964	7.01765	7.10383	7.72569	7.75164	7.84076	8.02249
THC0290_1038	1214797	1215360	-1		THC0290_v2_1101		Protein of unknown function	564	1	THC0290_N_0736	THC0290_N_0736	10.5923	10.4259	10.3652	10.4828	11.1676	10.9741	11.4435	11.6625	10.7535	10.6668	10.3652	10.2094	10.0271	9.72635	10.2481	10.2887	9.7017	9.90934	10.0993	10.0127	10.6315	10.1767	9.93346	10.1431	10.0127	10.1509	11.1761	11.3284	10.7086	10.5885	10.2805	10.4452	10.6605	10.7182	10.402	10.4493	10.4723	10.3803
THC0290_1047	1222598	1224994	-1		THC0290_v2_1110		Protein of unknown function precursor, putative adhesin	2397	1	THC0290_N_0741	THC0290_N_0741	10.2757	10.153	10.2024	10.0807	10.2152	10.5959	10.412	10.2519	10.8947	10.8658	10.1706	10.149	9.83375	9.58124	10.0969	10.145	9.58124	10.0293	9.59896	8.75527	10.2396	10.1079	10.2734	10.2281	10.125	10.3545	10.2961	10.1767	10.1139	9.92037	10.1079	10.3143	9.90718	9.77954	10.1509	10.3077	10.145	10.153
THC0290_1048	1225034	1227307	-1		THC0290_v2_1111		Protein of unknown function precursor, putative adhesin	2274	1	THC0290_N_0742	THC0290_N_0742	9.40568	9.34326	8.83225	8.96623	9.10166	8.91722	9.09248	9.53588	9.06488	8.60516	8.64577	8.56504	9.30281	9.22192	8.94599	9.20447	9.30824	9.39053	8.58089	8.73195	9.4314	9.47184	9.40905	9.52102	9.21681	9.45023	9.18399	9.15163	9.9474	9.87441	9.09248	9.25034	8.13985	8.18646	9.04655	9.10498	9.4798	9.25561
THC0290_1070	1247959	1249245	1		THC0290_v2_1133		Glycosyl transferase, group 1 family protein	1287	1	THC0290_N_0751	THC0290_N_0751	11.1834	11.3526	11.0228	10.8564	10.5067	10.3441	10.0001	11.0312	9.81029	9.96786	10.8048	10.9593	9.98944	10.2094	10.2937	10.3609	10.3385	9.71328	9.74499	9.84969	11.011	11.4156	11.5672	11.4073	11.5215	11.3026	10.8361	11.0767	10.5923	10.8154	11.1977	10.9393	9.97668	9.75679	11.1028	10.9532	11.0701	11.2416
THC0290_1071	1249303	1250268	-1		THC0290_v2_1134		Glycosyl transferase, group 2 family protein	966	1	THC0290_N_0752	THC0290_N_0752	8.47284	8.75948	9.00979	9.21382	9.53588	9.41358	9.47742	11.6019	8.8575	9.47184	8.89532	9.11927	9.49027	9.70863	9.64525	9.58662	9.33523	9.67257	9.60883	9.12777	8.60135	9.14552	8.61446	8.62601	8.65311	8.80221	9.57625	9.67018	8.6785	8.88107	8.53447	8.72043	8.42782	8.43288	8.62129	8.65311	8.52189	8.7117
THC0290_1078	1255885	1257000	-1		THC0290_v2_1142		Putative mannosyltransferase	1116	1	THC0290_N_0753	THC0290_N_0753	9.48806	9.52102	9.42839	9.4232	9.37064	9.4314	8.96623	9.8301	9.08956	8.65628	9.21681	9.1547	8.4769	8.50816	8.8575	8.60135	8.4057	8.56055	8.96623	8.77143	9.54872	9.7402	8.90107	8.96623	8.75527	9.00979	9.70863	9.74499	9.11344	9.32102	9.34326	9.55902	8.58914	8.88107	9.39264	9.39759	9.39053	9.51597
THC0290_1086	1266894	1267535	1	ddpX	THC0290_v2_1150	ddpX	D-alanyl-D-alanine dipeptidase	642	1	THC0290_N_0759	THC0290_N_0759	8.17486	8.32501	8.46538	8.35741	8.49708	8.69046	8.30124	8.39614	9.04353	9.25561	8.43288	8.40046	9.03179	9.26081	8.09694	8.29694	9.69482	9.7356	9.70656	8.98881	8.09694	8.24059	8.05962	7.69131	7.76329	7.62336	8.33778	8.23604	9.2959	9.52102	8.61787	8.43288	8.04979	7.96205	8.54302	8.50816	8.22154	8.4769
THC0290_1087	1267536	1268105	-1		THC0290_v2_1151		Protein of unknown function precursor	570	1	THC0290_N_0760	THC0290_N_0760	9.17497	9.18399	8.80602	8.65311	8.42782	8.31048	8.02785	8.90408	7.79051	7.71855	8.86722	8.80986	7.75164	8.01163	8.00132	7.94046	5.26077	7.99072	8.48874	8.14923	9.0822	9.28492	9.01591	9.02224	9.00726	8.98189	8.64577	8.41431	8.79908	8.86722	8.93544	8.96075	7.25127	7.87726	8.75527	8.98189	8.74735	9.01289
THC0290_1099	1283185	1284720	1		THC0290_v2_1164		Protein of unknown function	1536	1	THC0290_N_0768	THC0290_N_0768	9.11344	9.09888	9.62986	9.89785	9.71328	9.62292	10.0869	7.51675	10.4282	10.1685	9.97226	9.82806	10.5737	11.3848	10.1854	9.99604	11.9305	10.8739	11.4714	11.5192	9.00375	8.85373	9.12274	8.77485	9.15798	9.22471	8.97258	9.04655	9.68343	9.46906	9.33523	9.50092	10.4084	10.0969	9.44755	9.44755	8.90107	8.86109
THC0290_1100	1285018	1285905	-1	yojE	THC0290_v2_1165	yojE	Probable permease YojE	888	1	THC0290_N_0769	THC0290_N_0769	8.83511	8.81362	8.79908	8.73926	8.46892	8.62998	7.99072	8.51267	8.41893	8.3288	8.64147	8.505	7.1798	4.14146	6.05396	6.95491	5.36609	7.58988	6.28131	3.94588	8.58914	8.88719	9.00979	8.95781	9.10776	8.88107	8.76354	8.52659	8.01804	8.23158	8.61446	8.66019	7.31401	7.29881	8.56865	8.66789	8.66789	8.91722
THC0290_1102	1288103	1289032	1		THC0290_v2_1167		Probable lipoprotein precursor	930	1	THC0290_N_0771	THC0290_N_0771	9.84969	10.0479	9.79495	9.89286	9.58402	9.48519	9.70656	9.92723	10.2196	10.2436	9.80836	9.77711	10.7228	11.2724	10.1386	10.1097	10.7438	10.9367	10.7672	10.6109	9.86054	10.004	10.2007	9.97434	9.85461	9.85461	9.53859	9.62292	9.73333	9.9407	9.86458	9.84031	9.55105	9.26691	10.1558	9.9474	10.0001	10.0543
THC0290_1110	1298262	1298678	-1		THC0290_v2_1175		Probable arsenate reductase (glutaredoxin)	417	1	THC0290_N_0780	THC0290_N_0780	9.00979	9.22192	9.71088	9.60132	10.8865	10.86	12.7339	14.0947	10.3344	11.4299	9.82365	9.8701	12.9235	12.8845	12.6866	12.4245	11.6855	11.6729	10.1727	10.1989	9.04953	9.25349	8.76729	8.56055	8.68647	9.03442	8.93212	8.96075	8.89532	8.96374	9.66143	9.45693	11.7138	11.3684	9.38319	9.33793	9.63624	9.67018
THC0290_1111	1298680	1299294	-1		THC0290_v2_1176		Protein of unknown function	615	1	THC0290_N_0780	THC0290_N_0780	9.83375	9.65489	9.95549	9.90934	11.4031	11.3469	13.1364	14.0297	11.3451	12.2271	10.145	10.3634	13.7521	13.9206	13.5543	13.3212	13.0834	12.7294	11.5855	12.4602	9.51597	9.4232	9.45023	9.11927	9.52102	9.57625	9.33523	9.65279	9.50334	9.54872	10.1273	10.0744	12.6866	12.322	10.1273	10.004	10.2152	10.2347
THC0290_1121	1307925	1309172	1		THC0290_v2_1186		Probable transposase	1248	1	THC0290_N_0786	THC0290_N_0786	5.3972	5.06938	4.98805	5.14181	4.7735	5.10976	5.22358	5.06938	5.81527	5.98472	5.14181	4.94394	5.89361	7.5655	6.09763	5.49719	8.42782	7.80947	5.4278	9.20447	5.63371	5.71171	5.56814	5.81527	5.52982	5.71171	5.56814	5.29545	5.26077	5.14181	5.14181	5.36609	4.8993	4.57225	5.46069	5.14181	5.4278	5.33325
THC0290_1212	1396855	1397202	-1		THC0290_v2_1288		Probable CRISPR-associated (Cas) protein. Cas 2 family	348	1	THC0290_N_0794	THC0290_N_0794	8.20702	8.45306	9.475	9.53588	9.44494	9.19879	9.27817	7.98593	9.51597	9.01591	9.45247	9.62292	8.61446	9.28492	9.21948	9.09888	9.5639	8.79908	9.08956	10.195	8.24882	7.74551	8.39165	8.30588	8.44509	8.19676	8.94599	9.04953	7.75698	7.55797	8.58089	8.69686	9.20776	9.10498	8.8394	8.66019	8.51267	8.08473
THC0290_1222	1416407	1418398	1	uvrB	THC0290_v2_1301	uvrB	Excinuclease ABC, B subunit	1992	1	THC0290_N_0800	THC0290_N_0800	9.38065	9.33523	9.6502	9.74237	9.87201	9.96419	10.4892	9.11623	9.51086	9.6815	9.66572	9.58402	8.80602	9.17497	9.25843	9.39053	7.63232	9.00979	8.63397	7.54964	9.31057	9.06488	9.40568	9.46682	9.33265	9.6502	9.49336	9.52102	9.40008	9.01289	9.32102	9.46906	10.254	10.0993	9.61349	9.47742	9.2355	9.22966
THC0290_1223	1418395	1418796	-1		THC0290_v2_1302		Protein of unknown function	402	1	THC0290_N_0801	THC0290_N_0801	8.66456	8.60924	8.86109	9.32411	9.96419	9.68793	10.6361	12.6288	11.1183	10.7419	9.01591	9.03179	10.8739	10.9702	10.6021	10.6296	10.1787	10.4101	10.3697	9.62761	8.48874	8.90408	8.43288	8.58089	8.87401	8.87723	9.25561	9.42542	9.16902	9.40905	8.90107	8.90107	10.1431	10.2024	8.83225	8.81696	8.72459	8.46892
THC0290_1226	1420150	1420488	-1		THC0290_v2_1305		Hypothetical protein precursor	339	1	THC0290_N_0803	THC0290_N_0803	7.21628	7.20629	7.00701	7.03724	7.46743	7.97392	8.13985	8.81696	9.61349	9.65279	6.67062	7.20629	10.7349	11.2838	9.96205	9.80322	10.7067	10.6836	10.2912	10.0167	7.27986	7.27986	8.2533	8.13533	8.3288	8.63397	7.49272	7.15444	6.49242	7.10383	7.15444	7.16259	6.79159	6.90615	7.15444	7.13339	7.19717	7.27986
THC0290_1243	1435961	1436539	-1		THC0290_v2_1322		Probable transcriptional regulator, TetR family	579	1	THC0290_N_0806	THC0290_N_0806	6.43402	6.44732	6.90615	6.69899	6.6445	6.93011	6.46143	6.63028	7.00701	7.3982	6.6599	7.0619	6.90615	5.8428	7.10383	7.25127	3.89734	3.85333	4.19131	3.99669	6.50603	6.38205	6.28131	6.58879	6.43402	6.85235	7.28941	7.36407	7.12586	6.47655	6.67062	6.53405	6.28131	6.2285	6.34825	6.75114	6.57569	6.72349
THC0290_1250	1441437	1444604	1		THC0290_v2_1330		Probable multidrug resistance protein. AcrB/AcrD/AcrF family protein	3168	1	THC0290_N_0814	THC0290_N_0814	7.34758	7.16259	6.79159	6.97864	6.52064	6.56314	6.76253	6.89207	8.10331	7.66055	6.68579	6.63028	8.00132	7.95753	8.58914	7.92363	6.02937	6.90615	7.84737	8.51267	7.1884	7.26049	7.35575	7.75698	7.40732	7.50823	7.08043	6.94168	7.20629	7.23499	6.80519	6.99509	6.07545	5.98472	6.61498	6.85235	7.13339	6.97864
THC0290_1251	1444597	1446033	1		THC0290_v2_1331		Probable outer membrane efflux protein precursor	1437	1	THC0290_N_0814	THC0290_N_0814	7.10383	7.00701	6.86332	6.99509	6.50603	6.41727	6.81712	6.76253	7.9459	7.25127	7.0619	6.95491	7.89454	8.05432	7.82336	7.55797	7.74551	7.13339	4.32476	8.73926	6.89207	7.36407	7.23499	7.35575	7.67633	7.51675	7.21628	7.07162	7.13339	7.3982	6.69899	6.79159	6.56314	6.96768	6.73552	6.81712	6.71302	7.14422
THC0290_1267	1466605	1467867	1	mscS2	THC0290_v2_1350	mscS2	Probable small-conductance mechanosensitive ion channel MscS2	1263	1	THC0290_N_0821	THC0290_N_0821	10.3038	10.4705	10.3406	10.3652	10.4222	10.3118	10.4452	11.9977	10.3118	10.254	10.1431	10.2481	10.0615	9.7611	10.2133	10.3059	9.98944	9.86263	9.42542	9.38538	10.3782	10.5275	10.2692	10.3363	10.1386	10.1875	11.0291	11.0353	10.4511	10.594	10.3652	10.5132	10.1989	10.2598	10.3759	10.4084	10.3856	10.3462
THC0290_1271	1469304	1469903	-1	hisIE	THC0290_v2_1354	hisIE	Histidine biosynthesis bifunctional protein HisIE [Includes: Phosphoribosyl-AMP cyclohydrolase, Phosphoribosyl-ATP pyrophosphatase]	600	1	THC0290_N_0822	THC0290_N_0822	6.67062	6.09763	5.76587	5.81527	4.57225	4.8993	4.8993	4.48766	4.45186	3.98674	6.00342	5.96334	5.3972	6.02937	4.25642	5.3972	7.57321	5.33325	5.46069	8.8394	6.83835	7.12586	6.41727	7.2427	6.61498	6.73552	5.26077	5.63371	6.02937	6.02937	5.3972	5.79466	5.49719	5.26077	5.6804	5.56814	6.1785	6.39928
THC0290_1281	1479547	1481574	-1		THC0290_v2_1365		Probable transmembrane protein of unknown function	2028	1	THC0290_N_0826	THC0290_N_0826	7.92363	7.88357	8.5475	8.49708	8.8394	9.34067	8.70841	9.61349	8.32501	8.68647	8.48093	8.44854	8.94599	9.37541	8.72043	8.89853	8.93212	8.95781	9.21382	8.20702	7.80465	8.11531	7.77019	7.41445	7.82992	7.74551	9.05239	8.88719	8.54302	8.80221	7.8161	8.03264	8.41061	8.61787	7.95753	7.97392	7.87726	8.28212
THC0290_1285	1485338	1485874	1		THC0290_v2_1369		Probable DNA polymerase III subunit	537	1	THC0290_N_0830	THC0290_N_0830	9.40267	9.46682	9.697	10.0018	10.3856	10.5696	10.4202	9.9407	11.3284	11.2227	9.66371	9.71782	10.9045	10.8026	10.8907	10.5959	10.4723	10.4202	10.3344	9.97226	10.0316	9.6323	9.38319	9.08478	9.31294	9.28996	10.2044	10.145	9.96786	9.7402	9.62292	10.1079	9.50334	9.62761	9.71782	10.0201	9.88578	9.79495
THC0290_1286	1485887	1486099	-1		THC0290_v2_1370		Hypothetical protein	213	1	THC0290_N_0831	THC0290_N_0831	8.37886	8.05962	8.53447	8.77776	9.38538	9.25561	9.93843	12.8382	11.0498	10.3002	8.52189	8.58914	9.99156	10.3298	9.71782	9.65714	10.4937	10.5023	11.482	11.9735	8.04452	8.33778	7.83631	7.70549	7.93562	7.85926	9.2328	9.34326	8.66789	9.09888	8.21639	8.33216	8.82798	9.04353	8.28212	8.26819	8.24059	8.30588
THC0290_1299	1497358	1498593	-1		THC0290_v2_1383		Probable phosphohydrolase	1236	1	THC0290_N_0840	THC0290_N_0840	9.39264	9.49027	9.88818	9.81488	9.92497	9.84031	9.65489	10.0226	9.40905	9.76871	9.90482	10.1509	9.66143	9.64721	9.34864	9.45247	9.11623	9.21049	8.83511	8.98189	9.33793	9.55105	9.7314	9.67257	9.73333	9.80548	9.85461	9.70863	9.57625	9.62292	9.70863	9.60601	8.93212	9.06488	9.56595	9.62761	9.34067	9.55363
THC0290_1300	1498732	1499442	1		THC0290_v2_1384		Probable transmembrane protein of unknown function	711	1	THC0290_N_0841	THC0290_N_0841	6.05396	5.89361	6.49242	6.67062	6.00342	6.33213	5.86835	7.52601	4.32476	4.65406	6.56314	6.53405	4.41087	3.96838	5.33325	4.8993	4.08251	4.34892	5.06938	4.94394	5.79466	6.00342	6.09763	5.73754	5.76587	5.52982	6.2285	6.13987	6.19441	6.29868	6.24775	6.24775	5.03441	4.32476	5.98472	6.07545	5.81527	6.13987
THC0290_1302	1500376	1501800	-1		THC0290_v2_1386		Probable ATP-dependent exodeoxyribonuclease	1425	1	THC0290_N_0843	THC0290_N_0843	9.74499	9.71328	10.2152	9.91125	9.98944	10.2869	10.4511	10.0543	9.55363	9.6388	10.1605	10.0764	9.72412	9.53086	9.37541	9.04953	9.36566	9.15163	8.3288	8.4769	10.052	9.62065	10.025	10.2436	10.1989	10.5258	10.2347	10.2667	9.92497	9.53588	9.93843	10.2481	10.5067	10.3385	9.85665	10.0316	9.90001	10.0657
THC0290_1305	1506011	1506835	1		THC0290_v2_1389		Protein of unknown function	825	1	THC0290_N_0844	THC0290_N_0844	9.93113	9.85665	9.48806	9.2328	9.48806	9.73333	9.60601	10.7837	9.61602	9.89549	9.67942	9.75172	9.87663	9.80548	9.47742	9.60883	9.45023	9.84288	9.28996	8.46538	9.84969	10.4141	9.77711	9.88578	10.0636	10.149	9.78848	9.78163	9.67456	9.84288	9.89785	9.67942	9.61602	9.59682	9.7314	9.8814	9.98451	9.99156
THC0290_1307	1507520	1509589	-1		THC0290_v2_1391		Probable TonB-dependent outer membrane receptor precursor	2070	1	THC0290_N_0845	THC0290_N_0845	6.8285	7.50823	8.13985	8.09694	8.86397	8.56504	8.80221	9.1431	8.37886	9.0822	7.08043	7.53385	10.0018	10.052	10.2234	10.2869	9.59682	9.81918	9.52799	9.32729	6.56314	6.28131	6.02937	5.76587	6.09763	5.60086	7.37412	7.27986	6.71302	6.90615	7.95049	7.76329	7.05011	7.0619	7.80947	7.71176	7.41445	7.69131
THC0290_1341	1546003	1546728	1		THC0290_v2_1425		Two-component system response regulatory protein, LytTR family	726	1	THC0290_N_0849	THC0290_N_0849	9.14016	9.12777	9.16328	8.99386	9.27292	9.45693	9.29857	9.7356	9.46906	8.89532	9.17497	9.09888	9.00375	9.07688	8.89853	8.67507	8.59754	8.80986	9.1957	9.70656	9.14552	9.28131	9.02224	8.76354	8.89134	8.7117	9.19879	9.37778	9.03741	9.28743	8.89853	9.33008	8.62998	8.58442	8.99152	8.91061	9.13735	9.07104
THC0290_1342	1546769	1548826	-1		THC0290_v2_1426		Protein of unknown function precursor	2058	1	THC0290_N_0850	THC0290_N_0850	7.88357	7.94046	8.58442	8.76729	9.46682	9.49027	9.8701	10.5565	10.2094	10.3462	8.44509	8.66019	10.8803	10.9257	10.4042	10.3652	10.1229	10.3568	10.3609	10.025	7.69131	7.86535	8.32106	7.77789	8.16389	7.72569	8.96922	9.12274	8.48874	8.79908	8.34726	8.80602	8.53888	8.34726	8.48494	8.23604	7.88889	7.85926
THC0290_1357	1567003	1567947	1		THC0290_v2_1442		Probable transmembrane protein of unknown function	945	1	THC0290_N_0860	THC0290_N_0860	8.53012	8.42311	8.38295	8.3288	8.25914	8.57585	8.21639	8.01804	8.27268	8.59754	8.34726	8.24059	10.2734	10.2869	9.32411	8.98881	10.2961	9.97226	9.39053	9.56163	8.88719	8.35302	8.44509	8.71633	8.5475	8.69686	8.61787	8.36212	8.80221	8.78242	8.6785	8.45306	7.9112	7.98593	8.39165	8.49259	8.7117	8.48494
THC0290_1368	1580392	1581048	-1	tal	THC0290_v2_1451	tal	Transaldolase	657	1	THC0290_N_0867	THC0290_N_0867	11.5102	11.4132	10.9947	10.9552	11.1813	11.2025	11.2766	12.0856	12.0856	12.2917	10.9843	11.147	12.7339	13.0906	12.0638	12.1043	13.7198	13.5633	13.4064	14.1786	11.2227	11.5533	11.3617	11.09	11.3889	11.2437	11.4091	11.364	10.8441	11.1206	11.1162	11.0939	11.1086	11.0639	11.092	11.3026	11.2134	11.3168
THC0290_1379	1588150	1589772	1	adeC	THC0290_v2_1462	adeC	Adenine deaminase	1623	1	THC0290_N_0876	THC0290_N_0876	8.81362	8.82108	8.46111	8.4057	8.10946	8.01804	8.00132	8.21199	8.88107	8.81362	8.90107	8.69686	8.83225	9.11623	8.60135	8.75948	8.46111	9.45247	9.2355	9.65489	8.62601	8.92765	8.94918	8.76729	8.93872	8.79908	7.96205	7.95049	8.36212	8.58914	8.63692	8.68279	8.03886	7.97917	8.66456	8.67185	8.36699	8.46111
THC0290_1407	1626512	1627642	-1		THC0290_v2_1491		Probable membrane fusion efflux lipoprotein precursor	1131	1	THC0290_N_0899	THC0290_N_0899	8.89134	9.09248	9.53859	9.55627	11.068	11.0596	11.0575	11.3168	7.63914	8.23604	7.77789	7.9112	8.83511	8.76729	9.01289	8.96922	8.77776	9.10166	9.76377	10.1118	9.14807	8.81362	9.24731	9.34562	9.59682	9.31822	9.74964	9.89286	8.68647	8.76354	9.49336	9.58402	10.1164	10.1035	9.42839	9.51849	9.41633	9.22192
THC0290_1428	1656370	1657245	1		THC0290_v2_1515	lpx	Lipid A biosynthesis acyltransferase	876	2	THC0290_N_0914	THC0290_1429;THC0290_N_0914;THC0290_N_0915	8.16389	8.28212	8.05962	8.16389	8.62601	8.74735	9.06789	10.4705	9.52558	9.54872	8.05432	8.04452	9.98647	10.1706	9.7993	9.64721	9.03741	9.37541	7.87124	9.46682	8.16952	8.46111	8.48874	8.49708	8.56865	8.73195	8.62998	8.82798	8.61787	8.93544	8.15993	8.3288	8.49708	8.58914	8.39614	8.36212	8.43288	8.46538
THC0290_1429	1657242	1658729	-1		THC0290_v2_1516		Putative aminotransferase	1488	1	THC0290_N_0916	THC0290_N_0916	10.6446	10.3441	10.0784	10.4063	10.5132	10.3096	10.5258	10.8826	10.9552	10.4141	10.2301	10.1811	10.4705	11.0312	10.2417	10.2577	11.0961	10.4631	10.4388	10.0456	10.4042	10.3344	10.0406	10.1605	10.197	10.1291	10.2068	10.3441	10.0784	10.2912	10.0869	10.3229	10.2024	10.3568	10.0869	10.2301	10.3715	10.2417
THC0290_1435	1668323	1669051	1		THC0290_v2_1522		Protein of unknown function	729	1	THC0290_N_0921	THC0290_N_0921	11.2416	10.945	10.7837	10.7672	10.9702	10.5089	11.1739	10.6691	11.2204	10.8842	10.8543	10.943	10.2757	10.6515	10.9947	10.9347	10.6964	10.424	10.3002	10.9532	10.8135	11.0089	11.1595	11.1304	11.1977	11.2113	11.0089	10.9321	10.598	10.7204	10.468	10.4765	10.3484	10.1875	10.5737	10.5003	10.6836	10.4806
THC0290_1436	1669135	1669644	-1		THC0290_v2_1523		Protein of unknown function	510	1	THC0290_N_0923	THC0290_N_0923	9.01591	9.17497	9.63436	9.64283	9.77097	9.53588	9.83567	11.218	10.1875	10.424	9.70656	10.0201	9.66572	9.97668	9.51086	9.7314	10.052	10.0869	10.195	9.69482	8.86109	8.77485	8.92416	8.53888	8.89532	9.60883	9.21049	9.17497	9.00979	9.1342	9.27817	9.35122	10.6986	10.8803	9.39511	9.18399	8.64147	8.66019
THC0290_1439	1671770	1672249	1		THC0290_v2_1526		Putative transcriptional regulator, XRE family	480	1	THC0290_N_0927	THC0290_N_0927	7.432	7.54121	7.55797	7.36407	7.48468	7.58254	7.63914	8.42782	9.16902	9.26691	7.59735	7.57321	9.50092	9.83567	9.14552	9.22471	9.51849	9.93594	10.6964	10.1706	7.31401	7.59735	7.55797	7.63914	7.48468	7.86535	7.38787	7.33006	7.30655	7.57321	7.54964	7.41445	7.84737	7.83631	7.54121	7.44072	7.30655	7.47539
THC0290_1442	1673616	1674092	-1		THC0290_v2_1529		Probable transcriptional regulator	477	1	THC0290_N_0929	THC0290_N_0929	8.58442	8.37545	7.97917	8.23604	8.05432	7.47539	7.73254	9.2355	5.60086	6.26409	8.08006	8.06998	7.13339	6.16079	6.75114	6.33213	7.68329	6.91981	6.60195	3.90824	8.5475	8.52659	8.77485	8.82108	8.84252	8.69372	8.23604	8.32501	8.11531	8.11531	7.78485	8.24882	6.80519	7.50097	8.29694	8.09694	8.40046	8.24882
THC0290_1447	1678907	1680694	1		THC0290_v2_1534		Probable ABC-type multidrug transport system, ATPase and permease components	1788	1	THC0290_N_0934	THC0290_N_0934	10.5201	10.5737	10.2301	10.4084	10.3759	10.0969	10.4806	11.3126	10.0615	9.8447	9.96599	10.0744	9.9474	10.7775	10.3652	10.3916	10.1811	9.90482	10.131	10.3697	10.6179	10.7228	10.7535	10.7086	10.7552	10.8826	10.5067	10.6691	10.7695	10.9173	10.4806	10.4063	10.487	10.5677	10.5108	10.3317	10.4828	10.5233
THC0290_1450	1683750	1684166	1	yuxK	THC0290_v2_1538	yuxK	Protein of unknown function YuxK	417	1	THC0290_N_0939	THC0290_N_0939	10.7029	10.7816	10.8301	10.7858	10.4324	10.3185	9.73333	10.418	9.65489	9.16622	10.53	10.7714	8.0916	8.35741	8.62998	8.88107	8.70841	8.45658	9.16902	8.32501	10.8582	10.8174	10.3652	10.2196	10.2711	10.487	10.7775	10.7695	10.6489	10.6296	10.6714	10.5716	9.89076	9.95122	10.5359	10.7008	10.943	10.8174
THC0290_1451	1684233	1684379	1		THC0290_v2_1539		Hypothetical protein	147	1	THC0290_N_0939	THC0290_N_0939	10.2519	10.3527	10.2624	10.3441	9.86054	10.5429	9.42542	10.2734	9.38538	9.74964	10.2417	10.1685	12.0344	9.80322	10.7369	11.1347	8.49259	9.75172	10.759	9.34326	10.192	10.5258	9.98647	9.87441	9.89286	10.0406	10.4298	10.5218	10.0724	10.285	10.3258	10.3462	9.48806	9.31294	10.195	10.2133	10.5067	10.6797
THC0290_1455	1687990	1688883	1		THC0290_v2_1543		Probable transcriptional regulator, LysR family	894	1	THC0290_N_0943	THC0290_N_0943	6.34825	6.29868	6.21305	5.89361	5.79466	5.94315	6.00342	6.8775	7.09383	6.72349	6.1785	6.05396	7.69814	7.71176	6.79159	6.21305	8.01804	7.53385	7.97917	8.21199	5.81527	6.54815	6.39928	6.52064	6.50603	6.72349	6.1785	5.98472	6.16079	6.2285	6.39928	5.94315	5.33325	4.86015	6.02937	6.1785	6.38205	6.56314
THC0290_1473	1713087	1713590	1		THC0290_v2_1561		Probable transmembrane protein of unknown function	504	1	THC0290_N_0957	THC0290_N_0957	10.5447	10.6236	10.1622	10.0636	9.54112	9.5639	9.40905	9.36283	9.76871	9.56163	10.2887	10.145	9.03442	9.1342	9.38065	9.49869	9.12777	8.97258	5.33325	6.16079	10.4723	10.2692	11.0189	10.8926	11.0518	10.9928	9.69482	9.70656	10.0381	9.7993	10.5201	10.3652	10.0085	9.78163	10.3916	10.3344	10.412	10.5818
THC0290_1477	1716729	1717007	1		THC0290_v2_1565		Hypothetical transmembrane protein	279	1	THC0290_N_0960	THC0290_N_0960	9.52102	9.32411	8.89853	8.96374	9.03179	8.77143	9.10166	9.82137	9.07104	9.62761	8.88414	8.72855	8.21639	8.53012	8.53012	9.17252	7.27095	7.90465	8.49708	4.23483	8.96374	9.33523	9.10166	9.28743	9.20177	9.07941	9.21681	9.35122	8.74291	9.03179	8.97258	8.91384	8.26367	8.33216	9.00375	8.88719	9.00979	9.18963
THC0290_1478	1717064	1717531	-1		THC0290_v2_1566		Protein of unknown function	468	1	THC0290_N_0963	THC0290_N_0963	10.928	11.0463	11.4617	11.8441	12.1438	12.0126	12.1122	13.727	12.018	11.6827	11.4132	11.3387	12.041	12.3016	12.4714	12.4841	11.7566	11.7995	11.1813	11.2922	10.7145	10.8926	11.4073	11.2227	11.838	11.3915	11.4643	11.9642	10.6427	11.068	11.0132	11.2766	12.1721	12.1122	11.2594	11.1855	11.0657	11.1616
THC0290_1485	1723494	1723727	-1		THC0290_v2_1573		Protein of unknown function	234	1	THC0290_N_0968	THC0290_N_0968	9.30824	9.37541	8.69372	8.89532	9.18963	9.4232	9.91603	11.498	10.351	10.5677	8.77143	8.54302	10.043	10.1831	10.05	10.0479	9.16622	9.57112	10.1097	7.66055	9.20177	9.45468	9.81918	10.025	10.0167	10.1896	9.08478	9.32102	8.86109	8.96922	9.07688	9.36828	9.40568	9.42089	9.11927	9.21382	9.65953	9.71782
THC0290_1504	1745068	1746849	1		THC0290_v2_1592		Two-component system sensor histidine kinase	1782	1	THC0290_N_0985	THC0290_N_0985	9.00089	9.07388	9.26081	9.22471	9.34326	9.45023	9.12274	9.95328	8.97553	9.39759	8.91061	9.01883	9.42089	9.4232	9.13055	9.02912	9.4798	9.53859	9.71576	10.1685	8.8575	9.21382	8.70477	8.79116	8.83225	8.85373	9.34326	9.31057	7.82336	8.20194	9.12551	9.30565	8.58089	8.56055	9.26081	9.28996	8.84252	9.02577
THC0290_1505	1746925	1747419	-1		THC0290_v2_1593		Putative phosphoesterase	495	1	THC0290_N_0986	THC0290_N_0986	7.8533	7.80465	7.27095	7.1884	7.01765	7.27986	7.46743	7.3982	8.63692	9.42839	7.30655	7.38787	9.22715	8.44509	7.74551	7.54964	7.45887	9.28131	8.96374	6.46143	7.95049	7.93562	8.26367	8.39614	8.2533	8.45306	7.29881	7.3982	7.38787	7.44072	7.45887	7.51675	6.52064	6.43402	7.67633	7.73897	8.02785	7.89979
THC0290_1509	1752478	1752975	1		THC0290_v2_1597		Protein of unknown function	498	1	THC0290_N_0990	THC0290_N_0990	4.25642	4.61113	4.29117	4.29117	3.98674	4.00702	3.98674	4.81525	3.87282	4.25642	4.21208	4.38349	3.96838	4.03561	3.99669	3.87282	4.14146	3.9395	3.85333	8.14417	4.14146	4.21208	4.01937	4.10684	3.87282	3.9395	4.08251	4.01937	4.52789	4.48766	4.25642	4.29117	4.57225	3.96838	4.12661	4.25642	4.02749	3.88664
THC0290_1536	1791488	1791967	1		THC0290_v2_1625		Probable transcriptional regulator	480	1	THC0290_N_1007	THC0290_N_1007	8.37169	8.46538	9.20447	8.87723	9.41358	9.7287	9.51597	10.3229	9.39759	10.6081	9.02577	8.79908	10.3484	10.3876	9.77954	9.65489	10.0406	10.5696	10.254	9.91603	8.53012	8.35741	8.27761	8.31048	8.37886	8.93544	9.24731	9.28131	8.87079	8.96075	8.93212	9.15798	9.21948	9.31057	8.93544	9.12274	8.23158	8.64953
THC0290_1537	1792043	1792879	-1		THC0290_v2_1626		Protein of unknown function precursor	837	1	THC0290_N_1008	THC0290_N_1008	10.9532	11.0539	11.1595	10.9593	10.7571	11.2457	10.532	11.7036	10.3934	10.6605	11.1834	11.2474	11.3963	11.068	10.2646	10.3298	10.8382	10.9633	11.092	11.1112	10.8424	11.0312	11.0791	10.7816	10.9238	10.5843	10.6902	10.6489	11.1183	11.4223	10.8759	10.8885	10.6758	10.7882	10.9822	11.011	10.8322	11.0876
THC0290_1538	1792954	1793694	-1		THC0290_v2_1627		Probable lipoprotein precursor	741	1	THC0290_N_1010	THC0290_N_1010	10.809	10.9367	11.7462	12.4212	12.7294	13.4681	12.1407	12.8086	11.8153	12.3389	10.8483	11.0556	13.5266	13.041	12.6827	12.9396	13.9289	14.2101	13.5121	14.1568	10.6515	10.7248	9.84288	9.83811	9.57888	10.2174	11.0155	11.1528	12.2012	12.3562	11.0876	11.1409	11.1834	11.1206	11.0791	11.2055	11.5148	11.5877
THC0290_1542	1796696	1797148	1		THC0290_v2_1631		Protein of unknown function	453	1	THC0290_N_1013	THC0290_N_1013	6.00342	6.34825	7.33843	7.12586	8.27268	8.7117	9.9576	9.72635	11.232	11.1676	6.43402	6.81712	12.1271	12.9024	11.6879	11.155	12.9486	12.7591	11.9735	12.4747	6.1785	6.16079	6.77671	6.63028	6.13987	6.1785	7.96906	7.84737	8.90734	8.52659	6.93011	6.3156	7.34758	7.32161	6.72349	6.58879	6.07545	5.73754
THC0290_1543	1797232	1798140	1		THC0290_v2_1632		Probable nucleoside-diphosphate sugar epimerase	909	1	THC0290_N_1013	THC0290_N_1013	9.58909	9.475	10.4141	10.1643	10.5864	10.759	11.0331	9.69923	10.5275	10.6648	10.0085	10.0724	13.766	13.5852	13.0906	12.6736	13.9027	14.1786	13.1839	13.1962	9.41358	9.27817	10.4828	10.3856	9.79319	10.226	9.9576	9.95549	10.7949	10.485	9.61602	9.82806	11.1528	11.1739	9.49588	9.77954	9.57112	9.39053
THC0290_1555	1808272	1809813	-1		THC0290_v2_1644		Protein of unknown function	1542	1	THC0290_N_1029	THC0290_N_1029	9.37275	9.4798	9.82365	9.92037	10.5716	10.383	10.4431	11.3728	10.8026	10.6296	9.91603	10.1431	10.5275	10.1409	10.3803	10.5447	10.0869	10.3545	10.8441	10.8926	9.37064	9.42839	9.1957	8.97553	9.06219	8.96075	9.88818	9.97668	10.7513	11.0556	9.35122	9.46417	10.2825	9.99384	9.55363	9.46417	9.48519	9.69482
THC0290_1557	1810503	1811564	1	menF	THC0290_v2_1646	menF	Isochorismate synthase	1062	1	THC0290_N_1030	THC0290_N_1030	9.90001	10.1661	10.6758	10.7965	11.6855	11.8045	11.6755	11.6191	11.2793	11.8441	10.4511	10.711	11.4617	11.3026	11.18	11.0701	10.9947	11.486	11.768	11.7619	10.1643	10.068	10.0828	9.8814	9.69273	9.73333	11.2986	11.1616	10.4408	10.1622	10.4298	10.3759	11.2677	11.5053	10.2937	10.3634	10.2301	10.1349
THC0290_1558	1811635	1812084	-1		THC0290_v2_1647		Protein of unknown function	450	1	THC0290_N_1031	THC0290_N_1031	12.2947	12.5046	12.751	12.4177	11.3867	10.9967	10.4222	11.6044	11.7913	11.7937	12.7459	12.8929	10.9928	11.5737	10.801	11.1369	11.2905	11.621	11.6657	11.2943	12.159	12.6736	12.5694	12.0856	12.6175	12.4339	11.6168	11.7259	11.9823	12.5455	12.5957	12.4565	12.0006	11.8905	12.4875	12.468	12.4602	12.5494
THC0290_1560	1813322	1813777	-1	coaD	THC0290_v2_1650	coaD	Pantetheine-phosphate adenylyltransferase	456	1	THC0290_N_1037	THC0290_N_1037	10.2981	10.3589	10.7775	11.0155	11.0312	11.1304	11.1916	11.6432	10.4532	10.4298	10.7648	10.8346	10.7145	10.3317	10.7438	11.0939	10.0636	10.3406	10.2502	9.42542	10.2024	10.2869	10.2937	10.1187	10.2598	10.2734	10.7987	10.8322	10.2115	10.4431	10.2692	10.416	10.3229	10.5696	10.3425	10.2372	10.1643	10.068
THC0290_1569	1824808	1827336	1		THC0290_v2_1659		Probable TonB-dependent outer membrane siderophore receptor precursor	2529	1	THC0290_N_1044	THC0290_N_1044	6.54815	6.61498	8.26367	8.42782	9.6109	9.2355	10.4786	11.147	11.5283	11.3005	7.84076	7.93025	10.5178	10.6986	10.711	10.7329	10.0993	10.1558	10.6556	10.485	7.08043	6.26409	6.19441	5.63371	5.46069	5.81527	7.48468	7.84076	5.36609	5.71171	7.61316	7.53385	10.1229	9.71576	7.88889	7.48468	6.99509	6.71302
THC0290_1584	1839466	1840854	1	trmE	THC0290_v2_1673	trmE	tRNA modification GTPase TrmE	1389	1	THC0290_N_1053	THC0290_N_1053	9.3878	9.33793	9.12777	9.19255	9.55363	9.83189	10.3363	9.12777	10.9741	10.9006	9.07688	8.90408	10.8072	11.042	10.8926	10.457	11.6357	10.8926	10.7291	10.1661	9.4798	9.30565	9.79741	9.89549	9.52558	9.81718	9.37778	9.30281	9.35122	9.25561	9.28492	9.27292	10.1747	10.2869	9.37778	9.42542	9.44245	9.6766
THC0290_1610	1868931	1869659	1	birA	THC0290_v2_1702	birA	Probable biotin -- [acetyl-CoA-carboxylase] ligase	729	2	THC0290_N_1073	THC0290_N_1072;THC0290_N_1073	8.13985	8.09694	8.31048	8.28212	8.13985	8.27761	7.87726	8.81362	8.45306	8.53447	8.36699	8.35741	8.3288	9.25349	8.34234	8.15993	8.64147	8.64147	9.73333	11.0767	8.0916	8.02249	8.05432	7.58254	7.96906	7.69814	7.92363	7.96906	7.65426	7.91755	8.20702	8.16389	7.76329	7.79051	8.32106	8.13985	7.96205	8.35302
THC0290_1623	1885425	1885799	-1		THC0290_v2_1716		Protein of unknown function	375	1	THC0290_N_1083	THC0290_N_1083	6.38205	6.68579	6.56314	6.61498	6.19441	6.16079	5.8428	7.44072	7.52601	7.40732	6.6445	6.8285	10.8926	11.7619	10.3344	9.4189	12.272	11.5855	10.9552	12.1098	6.91981	7.08043	6.89207	6.81712	7.15444	7.34758	6.02937	5.81527	7.57321	7.75164	6.56314	6.6599	6.2285	6.47655	6.75114	6.52064	6.73552	6.57569
THC0290_1635	1896444	1896833	1		THC0290_v2_1727		Protein of unknown function	390	1	THC0290_N_1094	THC0290_N_1094	9.82365	9.89785	9.93843	9.77711	10.5547	10.6534	10.58	10.1059	11.3684	11.6486	9.92497	10.05	11.1676	11.0247	10.4937	10.4042	10.6341	11.4476	11.6955	9.8447	10.0001	10.0226	10.3059	10.2007	10.3077	10.4368	10.1605	9.99604	10.0018	9.99793	10.2213	10.0849	9.7314	9.83567	9.98647	10.1079	9.9474	10.4786
THC0290_1636	1896834	1898237	-1	glcD	THC0290_v2_1728	glcD	(S)-2-hydroxy-acid oxidase	1404	1	THC0290_N_1095	THC0290_N_1095	10.5588	10.5447	11.1676	11.2251	11.6101	11.9877	11.7403	9.92919	11.8103	11.8801	11.2078	11.2159	11.0723	10.8638	10.6217	10.7067	11.0132	11.0025	11.1834	11.2743	10.5359	10.4742	10.2624	10.2174	10.0406	10.1727	11.1571	11.1286	10.6556	10.5505	11.0171	11.0539	11.3387	11.0228	10.9467	11.0007	10.7949	10.8926
THC0290_1638	1899746	1900837	1	argK	THC0290_v2_1730	argK	Periplasmic transport binding protein kinase ArgK	1092	1	THC0290_N_1096	THC0290_N_1096	8.79549	8.86397	9.22471	9.39511	9.60132	9.32102	9.43981	7.54121	10.1854	9.61853	9.41633	9.1957	9.65714	10.3993	9.60132	9.46417	10.7125	10.4141	10.6446	10.416	8.80602	8.59343	8.64953	8.5518	8.46111	8.32501	9.18703	9.27554	9.55902	9.56811	8.73195	8.88107	9.51086	9.45937	9.00089	8.84668	8.74291	8.56055
THC0290_1645	1908278	1909090	1		THC0290_v2_1738		Protein of unknown function	813	1	THC0290_N_1102	THC0290_N_1102	8.28212	8.27761	8.23158	8.16952	7.59735	7.83631	7.62336	7.44901	7.88889	8.04979	8.10331	8.22667	7.62336	8.03886	8.0916	7.71855	9.20447	8.26367	8.58914	9.12274	8.45306	7.98593	8.56865	8.59754	8.26367	8.6785	8.01163	7.80465	8.02785	7.74551	8.13533	8.01804	8.43656	8.17486	8.05432	8.11974	8.30124	8.06537
THC0290_1680	1949686	1951449	-1		THC0290_v2_1773		Probable TonB-dependent outer membrane receptor precursor	1764	1	THC0290_N_1131	THC0290_N_1131	9.06219	8.99386	8.69046	8.78242	9.2355	9.52321	9.71576	9.97434	10.2152	10.149	9.11927	9.26081	10.2044	9.49027	10.7182	10.7796	10.2692	10.5218	10.6534	9.36566	9.1342	9.15798	8.64577	8.82446	8.74291	8.57303	8.89532	9.03741	11.4073	11.4685	8.73578	8.68647	9.07941	9.21049	8.70093	8.69046	9.21049	9.09888
THC0290_1682	1954834	1955517	1	ftsE	THC0290_v2_1775	ftsE	Probable cell division ATP-binding protein FtsE	684	1	THC0290_N_1135	THC0290_N_1135	11.2709	11.5624	11.7995	12.0065	12.3084	12.0667	11.923	12.9287	12.0472	11.7336	11.6729	11.8486	11.7384	11.9576	11.6308	11.6515	11.8227	11.721	12.156	12.2421	11.2134	11.5831	11.576	11.4843	11.5855	11.3126	11.8486	11.9014	11.2905	11.526	11.5715	11.4523	11.2905	11.1528	11.4799	11.4565	11.4499	11.4685
THC0290_1683	1955614	1957143	-1		THC0290_v2_1776		Probable monooxygenase	1530	1	THC0290_N_1136	THC0290_N_1136	11.8987	11.8419	11.9069	12.018	11.3215	11.0742	11.1248	10.2577	10.4742	9.86458	11.8174	11.7336	9.475	10.5258	10.496	10.3278	10.9593	10.1787	10.5156	11.8251	11.8565	11.6019	11.7619	11.9069	11.7913	11.5896	11.2724	11.4246	11.6979	11.3526	11.7937	11.7566	11.3547	11.2134	11.8276	11.7307	11.9043	11.6386
THC0290_1692	1963765	1964379	1	trpF	THC0290_v2_1785	trpF	Phosphoribosylanthranilate isomerase	615	1	THC0290_N_1142	THC0290_N_1142	9.91371	9.59424	9.38538	9.35925	8.36699	7.85926	9.25349	7.87726	8.70093	8.41431	9.5639	9.52102	9.11927	9.16328	9.40267	8.95198	9.2328	8.21639	7.66055	6.60195	9.8447	9.42542	10.2234	10.7369	10.3441	10.2598	8.56504	8.68647	9.03442	8.87079	8.89532	9.17497	9.21382	9.37541	9.06488	9.10776	9.475	9.17804
THC0290_1713	1989405	1990778	1		THC0290_v2_1808		Probable peptidase	1374	1	THC0290_N_1156	THC0290_N_1156	8.85373	8.94599	9.22715	9.38538	9.38319	9.41633	9.05599	8.10946	9.31294	9.2444	9.35379	9.26413	9.93113	10.3185	9.18703	9.10776	9.85867	10.256	10.2174	9.60883	8.64953	8.80221	9.51597	9.34864	9.50092	9.21049	8.87079	8.83225	8.79549	9.00979	8.96922	8.9423	8.38295	8.21639	8.99756	9.04353	8.88719	9.07388
THC0290_1714	1990801	1991730	-1	menA	THC0290_v2_1809	menA	1,4-dihydroxy-2-naphthoate octaprenyltransferase	930	1	THC0290_N_1157	THC0290_N_1157	10.6001	10.2461	10.125	10.3229	10.5339	10.2007	10.9909	11.1248	11.3508	11.2793	10.2174	9.96786	10.5505	10.8424	10.945	10.8501	10.3002	10.2281	10.424	9.60365	10.2805	10.1273	10.3406	10.4549	10.3759	10.4609	10.1097	10.3406	10.3527	10.3059	9.94947	10.0724	11.0132	10.8301	10.1854	9.98155	10.3229	9.90934
THC0290_1717	1993758	1995554	-1	typA	THC0290_v2_1812	typA	GTP-binding protein TypA	1797	1	THC0290_N_1161	THC0290_N_1161	13.546	13.2946	12.3351	12.4524	11.7566	11.4758	12.0065	13.142	12.9486	12.7379	12.3751	12.2204	12.3117	12.5312	12.6086	12.7164	11.8687	11.82	11.893	11.4664	13.4282	13.5348	14.2101	14.3537	14.4551	14.3185	12.7209	12.8337	12.4379	12.5494	13.0606	13.2077	12.6046	12.6787	13.1902	13.1364	13.4479	13.3548
THC0290_1720	2005180	2006193	1		THC0290_v2_1816		Hypothetical lipoprotein precursor	1014	1	THC0290_N_1166	THC0290_N_1166	11.6454	11.8486	12.6249	12.7294	13.2158	12.9771	12.9976	12.4747	14.2	13.7873	12.5198	12.6524	14.3649	14.2737	14.4178	14.4693	14.1667	14.341	14.5423	15.0191	11.5148	11.5355	11.7307	11.1162	11.2616	11.2574	12.708	12.7636	13.61	13.6979	11.9518	12.1466	12.912	12.9024	12.018	12.075	11.8952	11.6604
THC0290_1744	2031995	2033749	1		THC0290_v2_1841		Probable ABC-type transport system, ATPase and permease components	1755	1	THC0290_N_1180	THC0290_N_1180	8.30588	8.19676	7.96906	7.96906	8.04979	8.08473	8.18021	8.82446	7.01765	6.90615	7.98593	8.01804	7.3982	6.41727	7.03724	7.01765	6.00342	6.95491	6.8775	6.29868	8.1902	8.40046	8.08006	8.37169	8.32501	8.44026	8.30124	8.30588	8.34234	8.48874	8.01804	8.04979	7.28941	7.432	7.98593	8.00132	8.29241	8.22667
THC0290_1745	2033820	2034134	-1		THC0290_v2_1842		Probable transcriptional regulator, HxlR family	315	1	THC0290_N_1181	THC0290_N_1181	7.23499	7.23499	7.13339	7.0619	7.68329	7.74551	8.31595	9.76377	10.4937	10.58	7.1798	7.08043	11.4758	12.2171	10.7291	10.4937	12.6954	12.431	12.1013	12.7804	7.11504	7.55797	7.22535	7.33843	7.52601	7.77789	7.1798	7.33843	7.85926	8.14923	7.21628	7.33843	6.86332	6.98599	7.05011	7.33843	6.90615	7.29881
THC0290_1746	2034264	2035148	1		THC0290_v2_1843		Protein of unknown function	885	1	THC0290_N_1182	THC0290_N_1182	8.55654	8.27268	7.64654	7.8161	7.9112	7.88889	7.78485	8.96623	8.76729	8.21639	7.96205	7.82992	8.26367	9.37778	8.26367	8.58089	7.90465	8.20702	7.8161	8.16952	8.18021	8.79549	7.96205	8.03264	8.05432	7.87726	7.71855	7.88889	7.66871	8.31048	7.9112	7.95049	7.87124	8.03886	8.05962	7.94046	8.43656	8.4057
THC0290_1752	2039545	2040498	-1	ftsY	THC0290_v2_1850	ftsY	Cell division protein FtsY	954	1	THC0290_N_1186	THC0290_N_1186	11.042	11.0374	11.0398	10.9967	11.4714	11.4738	11.9043	11.1206	12.1043	12.0233	10.9212	10.8382	11.2554	11.1635	11.3889	11.3684	11.4714	11.2986	11.0939	11.0742	11.1086	11.0374	10.8926	10.9552	10.8564	11.1977	11.3168	11.2616	11.4246	11.1571	11.2134	11.3387	11.1781	11.0353	11.0827	11.218	11.1761	11.2616
THC0290_1758	2043974	2044327	-1		THC0290_v2_1856		Probable two-component system. Phosphotransfer protein (HPt)	354	1	THC0290_N_1190	THC0290_N_1190	10.9212	10.908	10.9173	10.9173	10.594	10.5843	10.2711	9.77711	9.9576	10.0293	10.9467	10.8698	9.99604	10.2981	10.0108	9.84969	10.8826	10.6668	10.5818	11.427	10.8803	10.9741	11.0228	11.1781	11.1347	11.0701	10.6381	10.7552	10.6859	10.5467	10.7369	10.8483	10.5696	10.6197	10.7329	10.9321	10.9719	10.8424
THC0290_1764	2047921	2048418	1	pyrR2	THC0290_v2_1862	pyrR2	Bifunctional protein : pyrimidine operon regulatory protein and uracil phosphoribosyltransferase	498	1	THC0290_N_1192	THC0290_N_1192	10.4828	10.7086	11.2134	11.3489	11.9356	12.0719	11.5377	12.4909	12.0319	11.7995	11.1761	11.0596	11.5083	11.6515	10.9552	11.1225	11.9385	12.0856	11.6755	11.7189	10.2981	10.6315	10.3973	10.0922	10.4202	10.1581	11.2457	11.3547	10.3207	10.6131	10.8677	10.9347	11.1028	11.2766	10.8582	10.928	10.7067	10.7465
THC0290_1765	2048410	2048928	-1	aroK	THC0290_v2_1863	aroK	Shikimate kinase	519	1	THC0290_N_1193	THC0290_N_1193	7.66871	7.64654	7.62336	7.58988	7.77019	7.62336	8.18646	9.20447	9.06219	9.22192	7.33843	7.50823	9.10166	8.89853	9.00979	9.21948	7.97917	9.13055	9.03179	9.85461	7.52601	8.02785	7.38787	7.71855	7.59735	7.66871	8.31595	8.37169	7.78485	8.16389	7.84737	7.67633	7.36407	7.36407	7.61316	7.69131	7.71176	7.77019
THC0290_1779	2061863	2063539	-1	bluB/cobT	THC0290_v2_1877	bluB/cobT	Bifunctional protein : cob(II)yrinic acid a,c-diamide reductase and nicotinate-nucleotide--dimethylbenzimidazole phosphoribosyltransferase	1677	1	THC0290_N_1199	THC0290_N_1199	8.32501	8.21639	7.68329	7.61316	6.60195	6.58879	6.43402	5.73754	6.6445	5.86835	7.95049	7.80465	6.50603	7.31401	6.90615	6.2285	8.29694	7.19717	8.59754	8.82446	8.20194	7.83631	8.96922	8.93212	8.99152	9.11623	7.31401	7.32161	8.16952	7.79051	7.75698	7.96205	6.54815	6.80519	7.97917	7.89454	8.16389	7.95049
THC0290_1780	2063724	2064236	-1	cobU	THC0290_v2_1878	cobU	Bifunctional protein cobU : adenosylcobinamide kinase and adenosylcobinamide-phosphate guanylyltransferase	513	1	THC0290_N_1199	THC0290_N_1199	9.74765	9.7314	9.50334	9.0822	8.07588	8.54302	8.00646	6.58879	6.6599	7.26049	9.6109	9.35925	7.45887	6.33213	7.36407	6.50603	7.9112	7.94046	5.81527	8.29241	9.97668	9.36828	10.6797	10.4345	10.412	10.5757	8.67507	8.49708	9.85867	9.1957	9.98647	9.64283	8.37886	7.76329	9.62512	9.7223	10.125	9.86766
THC0290_1781	2064233	2064637	-1		NA		Protein of unknown function	405	1	THC0290_N_1199	THC0290_N_1199	8.10946	8.06998	7.89454	7.82992	7.08043	7.51675	6.79159	5.86835	7.2427	7.2427	8.15476	7.96205	7.53385	7.96906	7.11504	6.38205	7.58254	7.97917	4.00702	6.33213	8.21199	7.88357	8.55654	8.27268	8.26819	8.24476	7.44901	7.30655	7.77019	7.54964	7.88889	7.99587	7.61316	7.08043	8.14417	8.53888	8.10946	8.34726
THC0290_1789	2072050	2074239	1		THC0290_v2_1887		Probable hybrid two-component system sensor histidine kinase and response regulator receiver	2190	1	THC0290_N_1202	THC0290_N_1202	8.78686	8.56504	8.73926	8.72459	9.21049	9.71088	9.44494	9.87201	8.55654	8.58442	8.77485	8.58442	8.46892	8.60924	8.33216	8.37886	9.14807	9.11623	9.1342	7.73897	8.74291	8.98881	8.35741	8.5475	8.47284	8.94599	9.11927	9.11623	8.99152	9.19879	8.56055	8.70477	8.70093	9.1342	8.4769	8.82798	8.58914	8.97553
THC0290_1790	2074226	2075038	-1	deoD	THC0290_v2_1888	deoD	Purine-nucleoside phosphorylase	813	1	THC0290_N_1203	THC0290_N_1203	8.77485	8.89134	8.77485	8.73195	8.80221	8.52659	8.5013	9.14807	8.16952	7.70549	8.81362	9.01591	8.66019	8.81362	9.35122	9.52321	7.93025	7.74551	6.6445	8.7117	8.77776	9.10776	9.16328	9.20447	9.41112	9.31057	8.61446	8.58442	9.06219	9.21382	8.77143	8.78242	8.11974	8.13985	8.74735	8.79116	8.92058	8.57585
THC0290_1808	2092716	2095151	1	fecA	THC0290_v2_1906	fecA	ABC-type iron(III) dicitrate-transport system component, TonB-dependent outer membrane receptor FecA precursor	2436	1	THC0290_N_1211	THC0290_N_1211	10.149	10.2667	11.1761	11.2709	12.2135	12.3819	12.2493	12.2044	9.72635	9.88378	11.3328	11.3963	9.00979	8.41431	9.76871	10.4511	9.03442	9.31822	8.14923	7.68329	10.1787	10.5505	9.71328	9.79046	9.79741	9.95328	11.2273	11.2055	10.052	10.0479	11.2227	10.8112	10.3258	10.0807	11.1004	10.7858	10.4222	10.3895
THC0290_1809	2095148	2095534	-1		THC0290_v2_1907		Acyl-CoA hydrolase family protein	387	1	THC0290_N_1212	THC0290_N_1212	9.77495	9.86263	9.99384	9.76626	11.1488	11.3617	11.4617	11.9205	10.2757	10.3484	9.97668	10.3229	10.5923	10.3545	10.5359	10.538	10.3096	10.53	10.1989	9.87441	10.043	10.1471	10.0636	10.2024	10.1059	10.6427	10.1875	9.87663	10.036	10.1767	9.81918	10.0316	9.45468	9.63624	9.81029	9.98647	9.59896	9.64721
THC0290_1810	2095539	2096027	-1		THC0290_v2_1908		Protein of unknown function	489	1	THC0290_N_1212	THC0290_N_1212	10.5178	10.6648	10.8026	10.763	12.2753	12.0472	12.431	12.3819	10.7882	10.9822	11.068	11.4476	10.9909	11.0443	11.1781	11.3469	11.1183	10.8698	11.0619	11.0575	10.6836	10.8405	11.0331	10.8277	10.9843	11.0723	11.0767	10.8026	10.5696	10.7837	10.6627	10.6197	10.5656	10.485	10.7535	10.7145	10.594	10.5757
THC0290_1817	2101406	2103211	-1	argS	THC0290_v2_1915	argS	Arginine--tRNA ligase	1806	1	THC0290_N_1216	THC0290_N_1216	10.8174	10.8048	10.5339	10.5656	10.1035	10.149	9.97434	10.2502	10.2133	10.1875	10.6882	10.5023	9.6766	9.59682	9.64067	9.82137	9.91603	9.98647	9.96599	10.2347	10.8638	10.928	10.945	10.8865	10.9411	11.0155	10.6197	10.6919	10.5864	10.8483	10.6315	10.8048	10.6217	10.5045	10.6062	10.8277	10.6627	10.759
THC0290_1856	2156568	2157035	-1		THC0290_v2_1956		Probable transmembrane protein of unknown function	468	1	THC0290_N_1242	THC0290_N_1242	10.3002	10.3736	10.4408	10.6556	11.364	11.5624	11.721	12.3621	12.9932	12.7459	10.4368	10.4202	11.6681	11.3005	11.7566	11.925	11.9405	12.5877	13.4142	13.0906	10.2281	10.416	10.3895	10.226	10.3425	10.3634	10.9778	10.9909	10.6627	10.801	10.3425	10.3895	10.7513	10.8842	10.4723	10.2961	10.4298	10.4594
THC0290_1858	2157892	2159358	1		THC0290_v2_1958		Protein of unknown function	1467	1	THC0290_N_1244	THC0290_N_1244	12.3892	12.3783	12.4565	12.4482	12.4177	12.8578	12.6866	12.4778	13.1242	12.9194	12.3251	12.3016	11.9606	11.6979	11.859	11.9014	11.7859	11.838	12.2421	12.1069	12.4875	12.2875	12.2493	12.3527	12.0943	12.2917	12.5916	12.4875	12.2044	12.0943	12.322	12.5536	12.5731	12.6249	12.3491	12.5731	12.3684	12.3084
THC0290_1859	2159423	2159875	-1		THC0290_v2_1959		Probable peroxiredoxin	453	1	THC0290_N_1245	THC0290_N_1245	11.8766	12.0573	12.3594	12.2531	12.3426	12.3426	12.2947	12.6736	12.0505	12.2493	12.1218	12.2982	13.9838	14.125	13.6896	13.8853	14.3185	14.4551	14.1344	14.125	11.7885	12.3856	11.9642	11.9706	11.8251	12.0294	12.2691	12.3084	12.8382	13.2292	12.2078	11.9706	12.1098	12.2917	11.9518	12.0149	12.0149	12.2421
THC0290_1863	2162962	2163354	1		THC0290_v2_1963		Protein of unknown function	393	1	THC0290_N_1249	THC0290_N_1249	11.1304	11.486	11.5946	11.5672	11.7832	11.9769	11.1183	12.2819	11.1956	11.1781	11.5355	11.6625	11.4499	11.4053	10.7228	10.809	10.9613	11.5647	11.6073	11.3451	11.2864	11.7964	10.8658	10.7837	10.9888	10.9778	11.576	11.5308	11.4523	11.6657	11.4617	11.5508	11.0025	11.2295	11.427	11.6657	11.5855	12.0808
THC0290_1864	2163366	2164622	-1		THC0290_v2_1964		Major facilitator superfamily (MFS) permease	1257	1	THC0290_N_1250	THC0290_N_1250	10.5716	10.1854	10.2757	10.6236	10.9843	10.8985	11.232	12.7804	10.6001	10.5233	10.7695	10.2301	10.3207	10.2887	10.626	10.3634	9.81029	10.197	10.3298	9.75432	10.3954	10.5156	10.3038	10.6836	10.6882	10.7051	10.0764	10.1787	9.64283	9.74499	10.1409	10.6109	11.4156	11.5308	10.1079	10.487	10.3876	10.8322
THC0290_1875	2180153	2181415	-1		THC0290_v2_1976		Protein of unknown function precursor	1263	1	THC0290_N_1260	THC0290_N_1260	9.04655	9.16328	9.6766	9.68557	9.69273	9.42542	9.48519	8.95781	9.55627	9.50092	9.42542	9.38319	8.96374	9.3878	9.01591	9.16622	8.73578	8.39614	8.38778	8.21639	9.04041	9.1547	9.06789	9.15798	9.04953	8.99386	9.27817	9.30565	9.38065	9.28131	9.38319	9.16328	9.46218	9.22715	9.16902	9.05239	9.18703	8.88414
THC0290_1883	2189177	2191300	1	mutB	THC0290_v2_1984	mutB	Methylmalonyl-CoA mutase large subunit	2124	1	THC0290_N_1263	THC0290_N_1263	10.7313	10.8842	11.1004	11.1004	11.0939	10.93	11.042	7.89979	10.3759	9.7993	11.1507	10.8501	9.30093	8.99386	9.475	9.64283	9.74765	9.16328	8.89853	9.75679	10.9125	10.2007	10.801	10.8907	10.7393	10.9657	10.9801	10.7837	10.6405	10.149	10.6489	10.9613	10.496	10.5023	10.7949	10.8501	10.7228	10.3059
THC0290_1884	2191556	2191678	-1		THC0290_v2_1985		hypothetical protein	123	1	THC0290_N_1264	THC0290_N_1264	7.65426	7.5655	7.1798	7.48468	7.49272	7.48468	7.2427	9.32102	8.35302	7.53385	6.95491	7.23499	4.1718	6.09763	6.2285	6.00342	6.11988	6.11988	7.53385	3.92477	7.35575	7.78485	6.44732	7.02551	6.8775	7.20629	7.84076	7.9459	6.73552	6.77671	6.99509	6.90615	7.02551	6.97864	6.90615	7.29881	7.59735	7.41445
THC0290_1901	2209061	2209762	1		THC0290_v2_2002		Protein of unknown function	702	1	THC0290_N_1278	THC0290_N_1278	9.17252	9.16622	9.38065	9.40905	9.55627	9.44755	9.33793	10.7125	9.50595	9.17804	9.34562	9.54872	9.79495	9.58662	9.79741	9.78595	8.31048	9.26997	9.12777	8.16389	9.34326	9.58662	8.93872	9.07388	9.31057	9.2444	9.45937	9.40905	8.94599	9.4189	9.04953	9.06219	8.77776	9.25561	9.20177	9.16328	9.22966	9.26691
THC0290_1902	2209759	2210490	-1		THC0290_v2_2003		Probable lipoprotein precursor	732	1	THC0290_N_1279	THC0290_N_1279	10.496	10.6515	11.6148	11.641	12.2819	12.3562	12.2452	13.0255	12.8206	12.6328	11.5192	11.6979	12.6736	12.8929	12.2235	12.1407	12.7459	12.7716	12.7164	12.7903	10.5843	10.8985	10.5818	10.3589	10.711	10.5608	11.6879	11.6148	11.3005	11.5377	11.042	11.2474	11.366	11.5696	10.8524	11.1488	10.7248	10.727
THC0290_1912	2222462	2222740	1		THC0290_v2_2013		Hypothetical protein	279	1	THC0290_N_1288	THC0290_N_1288	11.7515	11.7995	11.7832	11.6148	10.9257	11.5377	10.4549	11.4843	10.9888	11.6681	11.9877	12.018	12.2589	12.009	10.7145	10.9613	12.3285	12.9932	13.6896	12.5657	11.8952	12.2917	10.7837	10.9321	10.9719	11.5005	11.3405	11.1739	11.5647	11.8882	11.6386	11.7259	10.9045	10.9757	11.6486	12.0126	11.6432	12.1687
THC0290_1957	2284496	2285155	1	rnhB	THC0290_v2_2059	rnhB	Ribonuclease HII	660	1	THC0290_N_1324	THC0290_N_1324	8.24059	8.36699	8.8575	9.10498	9.4314	9.53086	9.17497	7.11504	9.6502	9.69273	8.7117	8.61787	9.73797	9.72412	9.02577	8.62129	8.44509	9.22966	9.697	9.20177	8.43288	8.15993	7.89979	7.93025	7.95753	7.63914	8.96623	8.9423	7.53385	7.34758	8.82798	8.96374	8.88107	8.90408	8.86109	8.98525	8.89853	8.73926
THC0290_1958	2285150	2285881	-1	lipB	THC0290_v2_2060	lipB	Lipoyl(octanoyl) transferase	732	1	THC0290_N_1325	THC0290_N_1325	9.71328	9.51086	9.74765	9.93113	10.5677	10.8277	11.1653	9.86766	12.2753	12.0573	9.87889	9.58662	12.2012	12.3158	11.5581	11.2986	12.7164	12.1368	12.2847	12.4841	9.52799	9.49336	9.68343	9.58402	9.74499	9.91125	9.86458	9.99384	9.60883	9.60365	9.53588	9.85867	10.3736	10.2115	9.66765	9.55902	9.40905	9.80836
THC0290_1967	2295152	2295868	1		THC0290_v2_2069		Probable methyltransferase	717	2	THC0290_N_1331	THC0290_N_1331;THC0290_N_1332	11.7403	11.5102	10.7648	10.8483	10.6986	10.6341	10.727	10.0337	10.4723	10.2044	10.9947	10.9125	10.3258	10.4368	10.256	9.97668	9.96786	9.90239	9.92723	10.3484	11.6101	11.482	11.2474	11.4458	11.1892	11.2864	10.7493	10.7882	10.53	10.538	11.0189	11.2295	9.57112	9.48806	11.1616	11.1781	11.6515	11.3754
THC0290_1968	2295865	2296506	-1		THC0290_v2_2070		Protein of unknown function	642	1	THC0290_N_1333	THC0290_N_1333	8.95198	8.97896	9.68557	9.84969	11.218	11.4053	12.1154	12.7716	13.3007	13.5633	9.16328	9.2355	14.4693	14.4178	14.2101	13.8775	14.8202	14.883	14.9443	15.2059	9.18703	9.40008	8.90408	9.45937	9.07688	9.67018	10.6515	10.8238	11.7964	12.2753	9.6502	9.4189	10.7313	10.8072	9.45693	9.50334	9.65279	9.9576
THC0290_1979	2307854	2308699	1		THC0290_v2_2081		Protein of unknown function	846	1	THC0290_N_1340	THC0290_N_1340	9.41358	9.27817	9.28743	9.07388	8.96623	9.60601	10.0148	7.45887	9.43407	9.03179	9.61853	8.81696	8.27268	7.90465	7.55797	6.91981	8.8394	8.31048	8.53447	9.28996	9.92723	8.8496	9.65714	10.4653	9.65489	10.4042	8.82108	8.5475	9.25034	7.9112	9.25349	9.45023	9.83189	9.70863	9.02912	9.40008	9.39511	9.40267
THC0290_1985	2311840	2312199	1		THC0290_v2_2087		Probable transcriptional regulator, XRE family	360	1	THC0290_N_1343	THC0290_N_1343	8.60516	8.76354	8.69686	8.66789	9.21948	9.3569	9.69923	9.97879	10.9148	10.8524	8.78242	8.96623	11.526	11.893	11.1326	10.7925	13.948	14.0947	13.7067	14.0402	8.8496	8.87079	8.85373	8.86109	8.76354	8.83225	8.77485	8.73926	9.56595	9.55363	8.89134	8.92765	9.67456	9.60601	8.90408	9.00726	9.05239	8.82108
THC0290_1986	2312225	2313022	-1	mscS3	THC0290_v2_2088	mscS3	Probable small-conductance mechanosensitive ion channel MscS3	798	1	THC0290_N_1344	THC0290_N_1344	9.18703	8.98881	8.49259	8.64147	8.67185	8.16389	9.08478	8.21639	9.64067	9.01883	8.87401	8.58089	8.2533	8.83225	9.00375	8.60924	7.8533	7.98593	8.90734	9.12551	8.93544	8.90734	9.07941	9.14016	9.20776	9.25034	8.03264	8.14417	9.08956	9.04041	8.72043	8.73926	8.39614	8.23604	8.83511	8.57585	8.93872	8.72459
THC0290_2000	2325959	2326681	-1		THC0290_v2_2103		Probable transmembrane protein of unknown function	723	1	THC0290_N_1349	THC0290_N_1349	7.84076	7.86535	8.05432	8.10331	8.06537	7.84076	7.61316	8.5475	8.42311	7.46743	7.99072	8.00646	7.10383	7.36407	7.29881	7.48468	6.72349	6.2285	6.85235	8.06537	7.78485	7.8161	7.58988	7.48468	7.87124	7.75164	7.94046	7.88357	7.28941	7.37412	7.86535	7.8533	7.88889	8.08006	7.80465	7.82992	7.68329	7.63914
THC0290_2032	2359616	2360341	1		THC0290_v2_2135		Phosphotyrosine protein phosphatase probably involved in exopolysaccharide biosynthesis	726	1	THC0290_N_1357	THC0290_N_1357	9.21948	9.10776	10.3229	10.4101	11.482	11.8174	12.0856	11.3963	12.3459	12.7209	10.2396	10.285	12.6605	12.159	12.4875	12.1189	12.1218	12.4212	12.3491	11.4953	9.29857	9.32411	9.78848	10.0148	10.0543	10.1643	10.3803	10.4828	8.64147	8.73926	10.0969	10.1622	10.5716	10.538	10.125	10.197	9.74964	9.91603
THC0290_2036	2365831	2366970	-1		THC0290_v2_2139		Probable aminotransferase	1140	1	THC0290_N_1361	THC0290_N_1361	10.0591	9.84969	9.53319	9.70656	9.16902	9.05599	9.00726	8.76354	9.11927	8.35741	9.74237	9.52321	8.37169	8.5013	8.67507	8.36699	8.34234	8.35302	8.04452	8.55654	9.88378	9.71088	9.49027	9.87889	9.60883	9.56163	9.31294	9.33523	9.45247	9.67257	9.44245	9.6388	9.2444	9.4189	9.63624	9.34067	9.7356	9.52102
THC0290_2057	2389956	2391452	1		THC0290_v2_2160		Sodium:solute symporter	1497	1	THC0290_N_1366	THC0290_N_1366	8.93872	8.78686	8.71633	8.81696	8.71633	8.30124	8.46111	8.36212	8.19676	8.05432	9.03741	8.90734	7.41445	7.91755	7.34758	8.20194	7.88889	7.38181	8.20194	6.49242	8.70477	8.75178	9.36283	9.2328	9.28743	9.22715	8.37545	8.25914	9.64525	9.69482	8.66456	8.69046	9.01591	8.93872	8.68279	8.61446	8.83225	8.5475
THC0290_2102	2423993	2424727	1		THC0290_v2_2203		Probable tRNA/rRNA methyltransferase	735	1	THC0290_N_1384	THC0290_N_1384	11.3347	11.1813	11.3867	11.1719	11.8801	12.2917	12.7945	10.1685	13.0255	13.5348	11.3963	11.1206	12.9719	12.538	12.8125	12.4447	12.6086	12.6368	12.6866	12.3594	11.5508	11.2724	11.9951	12.1407	11.8486	12.5014	11.2943	11.1225	11.3889	10.9062	11.4319	11.6432	12.6913	12.7636	11.4643	11.7159	11.5696	11.7462
THC0290_2104	2425856	2427133	1		THC0290_v2_2205		Putative AAA family ATPase	1278	1	THC0290_N_1389	THC0290_N_1389	9.76871	9.65953	9.23862	9.31523	8.79908	8.84252	8.82108	6.1785	9.10166	8.95198	9.39264	9.17497	8.59754	8.62129	8.12361	7.97392	8.95781	9.08704	8.93544	6.94168	9.7314	9.46906	10.05	10.0183	9.91603	10.0201	8.60516	8.43288	8.97553	8.7117	9.2959	9.58909	8.31048	8.13012	9.4798	9.42839	9.62512	9.58124
THC0290_2121	2443959	2444504	-1		THC0290_v2_2223		Hypothetical protein	546	1	THC0290_N_1399	THC0290_N_1399	9.4314	9.60132	9.15798	9.74499	10.5218	10.5716	10.8842	13.1242	12.3084	11.9205	9.33265	9.20447	12.2271	12.8482	12.041	11.9679	12.2556	12.1498	11.9823	11.4758	9.62292	9.97226	9.70863	9.60601	9.99793	9.72004	10.412	10.4298	9.88378	10.3634	9.33008	9.74237	9.82806	9.92919	9.46417	9.74964	9.85665	9.95549
THC0290_2125	2446389	2446838	1		THC0290_v2_2227		Protein of unknown function	450	1	THC0290_N_1400	THC0290_N_1400	7.97392	8.01163	7.79742	7.84076	8.1902	8.25914	8.3288	9.21681	9.28743	9.53086	7.44072	7.99072	8.77776	9.01289	8.88719	8.60516	8.39614	8.33216	7.08043	6.53405	8.02249	8.00132	7.33006	7.65426	6.89207	7.00701	8.00132	8.13533	7.89979	8.03886	7.85926	8.00132	7.82992	8.11974	7.94046	8.01163	8.0916	7.96205
THC0290_2126	2446835	2447953	-1		THC0290_v2_2228		Conserved protein of unknown function. Putative AAA family ATPase	1119	1	THC0290_N_1401	THC0290_N_1401	7.95753	7.87726	7.52601	7.68329	7.67633	7.69131	7.77789	9.27554	9.1957	8.76354	7.69131	7.61316	8.32501	8.76354	7.87124	7.80465	8.02249	7.79051	8.35741	9.47742	7.79051	7.90465	7.97917	7.55797	7.98593	7.79051	7.52601	7.79051	7.64654	8.12361	7.87124	7.77019	7.69814	7.59735	7.79051	7.64654	7.89454	7.84737
THC0290_2131	2453544	2455007	-1		THC0290_v2_2233		Probable transmembrane protein of unknown function	1464	1	THC0290_N_1404	THC0290_N_1404	7.77789	7.72569	7.50823	7.52601	7.00701	7.01765	6.33213	8.20702	4.23483	5.96334	7.54964	7.44901	4.94394	4.72891	4.08251	5.91853	7.10383	5.65744	7.1798	4.69267	7.59735	7.73897	7.54121	7.69814	8.08006	7.88889	7.59735	7.50097	7.50097	7.93025	7.31401	7.58988	7.10383	7.42371	7.48468	7.51675	7.58988	7.44901
THC0290_2147	2473488	2475218	1	gldJ	THC0290_v2_2250	gldJ	Gliding motility lipoprotein precursor GldJ	1731	1	THC0290_N_1415	THC0290_N_1415	14.1047	14.3289	14.4025	14.4299	14.492	14.8594	14.3087	13.9376	14.7262	14.4693	14.2965	14.3537	15.3255	15.502	15.0191	14.7449	14.9652	15.0014	15.2059	15.286	14.1047	14.0297	14.3649	14.3087	14.2641	14.2429	14.4178	14.1568	14.5801	14.5928	14.2858	14.2429	13.8853	13.9653	14.2965	14.2548	14.2641	14.1344
THC0290_2152	2486870	2487364	-1		THC0290_v2_2257		Protein of unknown function	495	1	THC0290_N_1418	THC0290_N_1418	9.45937	9.40008	9.79046	9.72635	10.1409	10.3385	10.3782	10.9822	10.6217	10.5529	9.48806	9.64283	10.4631	10.1187	9.62761	9.60601	10.1139	10.6315	10.4345	9.69923	9.41633	9.75911	9.50883	9.57888	9.66765	9.47184	10.145	10.0828	9.03179	9.13735	9.52102	9.51336	9.22966	9.05239	9.3878	9.37275	9.52799	9.60883
THC0290_2153	2487531	2488232	1		THC0290_v2_2258		Putative methyltransferase	702	1	THC0290_N_1420	THC0290_N_1420	9.28743	9.16902	9.40008	9.31822	9.18703	9.26413	9.21681	9.38065	9.2959	9.44245	9.28131	9.24185	9.34326	8.49259	9.06789	9.35379	8.45306	8.14923	8.06537	6.72349	9.15798	9.07388	9.43407	9.49588	9.35925	9.51086	9.16328	9.14807	9.21382	9.23862	9.25034	9.2328	9.46906	9.44755	9.14807	9.16622	9.12551	9.14552
THC0290_2159	2495709	2497403	-1		THC0290_v2_2265		Protein of unknown function precursor	1695	1	THC0290_N_1423	THC0290_N_1423	13.3697	13.1128	13.2077	13.2436	12.9662	12.8802	12.7416	12.159	11.2495	11.5236	13.1902	13.3007	12.0638	11.6357	12.3783	12.5046	11.9278	11.8612	11.7781	12.0344	13.1704	13.1128	13.0146	13.2234	13.05	12.9771	13.05	13.0957	14.504	14.1568	13.041	13.066	12.4141	12.4812	13.041	13.0714	13.1776	13.1571
THC0290_2167	2503503	2504846	-1	kmo	THC0290_v2_2273	kmo	Kynurenine 3-monooxygenase	1344	1	THC0290_N_1428	THC0290_N_1428	10.5505	10.424	10.4388	10.4473	10.4042	10.5529	10.5003	8.88719	10.1661	10.0724	10.6605	10.5467	9.21049	8.51714	9.49588	9.57625	9.22471	9.77954	8.44509	7.19717	10.5201	10.3258	10.4141	10.4806	10.487	10.6042	10.5201	10.5359	11.0228	10.8543	10.4141	10.5258	10.5608	10.3258	10.5818	10.5696	10.5505	10.58
THC0290_2190	2532896	2535271	1	pbpC	THC0290_v2_2296	pbpC	Membrane carboxypeptidase/penicillin-binding protein PbpC	2376	1	THC0290_N_1439	THC0290_N_1439	7.41445	7.51675	7.71176	7.79051	7.71176	7.69814	8.24476	7.14422	8.37545	7.93025	7.72569	7.33843	5.63371	4.57225	6.69899	7.23499	6.21305	6.21305	7.34758	4.45186	7.64654	7.67633	8.08473	8.16952	8.31048	8.14417	7.93025	7.63914	5.91853	6.16079	7.79742	7.69131	7.74551	7.73254	7.58254	7.68329	7.63232	7.44072
THC0290_2202	2550465	2551469	1	recA	THC0290_v2_2309	recA	Recombinase A	1005	1	THC0290_N_1453	THC0290_N_1453	13.0104	13.1242	13.1128	13.1004	13.1962	13.3765	13.1962	12.4524	13.7067	13.4479	13.1188	13.035	13.0034	13.0834	12.8578	12.8845	13.2806	12.907	12.7339	13.5043	12.9287	13.0455	13.1704	13.4064	13.2618	13.2618	12.7945	12.7844	12.0638	11.925	12.8765	12.9531	13.035	13.0606	12.825	12.9932	13.0957	12.907
THC0290_2261	2615487	2617520	1		THC0290_v2_2370		Probable transmembrane protein of unknown function	2034	2	THC0290_N_1478	THC0290_N_1478;THC0290_N_1479	8.01804	7.93562	8.56865	8.47284	8.89853	9.10166	8.98189	9.30824	9.32729	9.25034	8.75527	8.73926	8.73578	8.63397	8.60924	8.78686	7.84737	8.6785	9.36283	8.5475	7.77789	7.97917	7.45887	7.17196	7.07162	6.94168	8.21199	8.31048	8.44854	8.50816	8.11974	8.12361	8.86722	8.87079	8.18646	8.16389	7.77789	7.9112
THC0290_2262	2617523	2618095	-1		THC0290_v2_2371		Thioredoxin family protein precursor	573	2	THC0290_N_1481	THC0290_N_1480;THC0290_N_1481	11.6564	11.7281	11.9405	12.2078	12.0065	12.2204	11.736	11.5806	12.1887	12.2589	12.1368	12.1122	12.6005	12.2135	12.4112	12.6605	12.1887	12.468	13.1902	13.1499	11.5417	11.9977	11.8045	11.7591	11.8018	11.8565	11.5005	11.6931	13.2077	13.4759	11.7061	11.9735	11.8516	11.9333	11.7591	11.8801	11.8069	12.06
THC0290_2278	2635547	2636182	1	aat	THC0290_v2_2390	aat	Leucyltransferase	636	1	THC0290_N_1489	THC0290_N_1489	9.34864	9.14552	8.89532	9.43713	10.2234	10.0941	10.6797	9.95122	10.2577	9.91371	9.02912	8.81362	8.84668	8.69046	9.34326	9.1431	7.75164	8.5013	8.83225	7.87124	9.46218	9.26081	9.11073	9.1957	9.05868	9.04655	9.31057	9.47742	9.28131	9.08956	8.92416	9.08956	9.6109	9.45468	9.10776	9.00375	9.40008	9.2959
THC0290_2279	2636195	2636971	-1		THC0290_v2_2391		Probable membrane-associated esterase	777	1	THC0290_N_1490	THC0290_N_1490	9.21681	9.2355	9.99604	10.1787	10.8277	10.6902	10.7125	11.2724	10.8698	10.7965	9.88578	10.2436	11.0854	11.0171	10.8461	10.7438	10.7965	10.9257	11.4643	11.8612	9.1431	8.92058	9.21948	8.61446	8.93544	8.73926	9.92497	10.036	9.75172	9.75911	9.38538	9.29857	10.036	9.87663	9.34562	9.19255	8.90734	8.98525
THC0290_2281	2637645	2638259	1		THC0290_v2_2393		Protein of unknown function	615	1	THC0290_N_1492	THC0290_N_1492	7.80947	8.15476	8.60516	8.58442	9.43407	9.45468	9.59155	10.131	10.7925	10.6986	8.42782	8.80221	11.2495	11.4643	11.2273	11.4343	11.4476	11.4111	11.2616	11.5831	7.68329	8.18646	8.29694	8.20702	8.58089	8.23604	8.8575	8.96374	7.8533	8.24476	8.28671	8.14417	8.89853	8.80602	8.08473	8.29694	7.99072	7.97917
THC0290_2282	2638256	2638690	-1		THC0290_v2_2394		Hypothetical protein	435	1	THC0290_N_1493	THC0290_N_1493	9.41633	9.40905	9.07104	9.6766	9.53859	9.24731	8.99386	9.32411	7.93025	7.30655	9.34864	9.30281	6.11988	7.45887	6.73552	6.52064	7.54121	7.61316	7.96205	9.11927	9.83567	9.40267	9.16622	9.23862	9.25843	9.4189	9.41112	9.4189	9.81242	9.79495	8.99152	9.38538	8.58442	8.79549	9.24185	9.15798	9.52558	9.37541
THC0290_2290	2646450	2647133	1		THC0290_v2_2402		Probable M48 family membrane-associated zinc metalloprotease precursor	684	1	THC0290_N_1497	THC0290_N_1497	11.9431	12.0149	12.2305	12.512	12.7636	12.3918	12.6787	11.2078	12.8337	12.2947	12.2531	12.2305	13.1962	13.142	12.8929	12.5767	13.4064	13.4968	13.5348	14.2305	11.9823	11.8905	12.0638	11.9795	11.9769	11.8663	12.3285	12.2589	12.3351	12.2556	11.8401	12.0149	12.8125	12.8845	11.925	11.9576	11.9877	11.6073
THC0290_2291	2647347	2647766	-1		THC0290_v2_2403		Probable lipoprotein precursor	420	1	THC0290_N_1498	THC0290_N_1498	9.4189	9.56811	9.78848	9.83189	10.1386	9.83811	10.2825	11.18	10.5656	10.2646	9.52799	9.79741	10.5656	10.5359	10.468	10.594	11.0639	11.0291	11.8486	12.5046	9.34067	9.51086	8.95499	8.87401	8.82798	8.76729	9.58662	9.49869	10.5447	10.7182	9.37541	9.43713	9.5639	9.72635	9.53319	9.53588	9.40568	9.58909
THC0290_2302	2659729	2660124	-1	rnpA	THC0290_v2_2414	rnpA	Ribonuclease P protein component	396	1	THC0290_N_1506	THC0290_N_1506	10.8277	11.0876	10.5067	10.2981	10.7349	10.8361	11.1162	11.9706	11.6454	11.8856	10.594	10.3185	11.7566	11.5168	11.4364	11.6564	11.5053	11.8124	11.9487	11.2078	11.1066	10.9045	11.0089	10.8301	11.011	11.1676	10.8301	10.7438	10.9411	10.9928	11.147	11.1528	12.009	11.9679	11.1266	11.1388	11.4319	11.5581
THC0290_2317	2672407	2673723	-1	sufD	THC0290_v2_2429	sufD	Fe-S assembly protein, SufD	1317	1	THC0290_N_1517	THC0290_N_1517	12.372	12.2012	11.8486	11.7859	11.9576	12.1438	12.6328	12.9976	12.2235	12.3856	11.9795	11.9549	12.3527	11.768	12.6328	12.6214	11.859	12.1303	12.1531	11.3489	12.4245	12.4602	12.4975	12.8163	12.6328	12.6866	12.2044	12.2531	12.0943	12.1624	12.0882	12.1189	13.268	13.3352	12.0912	12.159	12.1947	12.1334
THC0290_2324	2681125	2681865	1		THC0290_v2_2436		Hypothetical protein	741	1	THC0290_N_1523	THC0290_N_1523	11.1916	11.0939	10.6341	10.5003	9.28996	9.22715	8.53012	6.54815	8.56055	8.23158	10.8072	10.5359	9.02224	8.95499	8.87723	8.38778	10.0381	9.35379	9.56163	10.5547	11.4364	11.0398	11.6541	11.5781	11.4091	11.7006	9.9182	9.82623	10.9492	10.7125	10.7393	10.8658	9.82623	9.6815	10.8154	10.8322	11.2513	10.8638
THC0290_2325	2681862	2682191	-1		THC0290_v2_2437		Probable ferredoxin	330	1	THC0290_N_1524	THC0290_N_1524	9.15163	8.96922	9.03741	9.32729	9.26081	9.54329	9.04041	9.90934	10.402	10.1035	9.26691	9.06488	10.0941	10.149	9.32729	9.38319	10.3527	10.6464	10.5405	10.2174	9.10166	9.50092	8.23158	8.51714	8.49708	8.48494	8.62601	8.78242	8.70477	9.07388	9.08956	9.21049	8.65628	8.69046	9.05868	9.24185	9.11344	9.37064
THC0290_2330	2689263	2690237	1		THC0290_v2_2442		Polyprenyl synthetase	975	1	THC0290_N_1528	THC0290_N_1528	10.6405	10.7067	10.5405	10.424	10.412	10.4259	10.5218	9.86054	9.95939	10.1013	10.4723	10.4408	9.71782	9.2355	9.51336	9.51849	9.43981	9.58909	9.51336	9.43407	10.6986	10.6556	10.7882	10.7571	10.6836	10.5903	10.5778	10.5156	10.5178	10.3916	10.5778	10.5885	10.1558	10.068	10.5608	10.6001	10.5864	10.538
THC0290_2331	2690305	2690658	1		THC0290_v2_2443		Protein of unknown function	354	1	THC0290_N_1528	THC0290_N_1528	10.2325	10.1605	9.79741	9.59896	9.68557	9.65489	9.5639	9.75679	9.20177	9.20447	9.54329	9.62986	8.63692	8.51267	8.68279	8.74291	7.69131	8.77485	8.39614	7.44072	10.1622	9.89076	10.2711	10.004	9.95328	9.8701	10.1208	9.9182	9.87201	9.72004	9.69482	9.78848	9.14016	9.07104	9.69923	9.82365	10.0784	9.93843
THC0290_2332	2690655	2691227	-1		THC0290_v2_2444		Hypothetical protein precursor	573	1	THC0290_N_1530	THC0290_N_1530	9.99156	10.0381	11.1445	11.1304	11.8227	11.9642	11.8743	12.6249	12.464	12.4112	11.0007	11.0374	11.923	11.8441	11.5487	11.5355	12.9235	13.0305	13.5266	14.4445	9.53588	9.7356	9.69011	9.48519	9.36283	9.02224	10.9045	10.9843	10.1471	10.2347	10.2912	10.1989	11.0463	11.1286	10.3441	10.1875	9.95939	10.1368
THC0290_2339	2706414	2707655	1	hflX	THC0290_v2_2451	hflX	GTP-binding protein HflX	1242	1	THC0290_N_1536	THC0290_N_1536	11.8952	11.736	11.82	11.838	12.0006	12.3594	12.2235	10.9593	11.7307	11.9458	11.8882	11.8441	11.2025	10.9321	11.2055	11.0463	11.0518	11.0639	10.6939	10.626	11.923	11.8516	11.8636	12.1531	11.8882	12.166	11.9795	11.9096	12.0294	11.8516	11.7697	11.7913	12.0943	12.2421	11.6704	11.8103	11.6955	11.7619
THC0290_2345	2713087	2715027	1	pbpA	THC0290_v2_2457	pbpA	Penicillin-binding protein 2. Peptidoglycan glycosyltransferase	1941	1	THC0290_N_1539	THC0290_N_1539	10.4141	10.4892	10.7535	10.4917	10.8722	11.4543	11.1047	9.71328	10.4609	9.87663	10.6296	10.457	8.33778	7.89454	8.69372	8.96075	8.61446	9.08478	9.68343	8.94918	10.6062	10.4981	10.4345	10.5633	10.3385	10.6157	10.9514	10.6341	10.2667	9.91125	10.6515	10.6986	9.60601	9.62292	10.4892	10.7349	10.6776	10.86
THC0290_2346	2715028	2716284	1	rodA	THC0290_v2_2458	rodA	Rod shape-determining protein RodA	1257	1	THC0290_N_1539	THC0290_N_1539	9.53588	9.4314	9.6815	9.59682	10.0922	10.4298	10.3441	8.90107	9.64283	8.68279	9.45693	9.3569	6.05396	4.52789	7.16259	7.69131	6.38205	7.79742	8.88414	8.24882	9.81242	9.56595	9.52102	9.54112	9.39053	9.75679	10.3118	10.0406	9.37275	8.99152	9.65714	9.7314	9.51336	9.8524	9.54557	9.77495	9.61349	9.72412
THC0290_2360	2730709	2731023	-1		THC0290_v2_2474		Hypothetical protein	315	1	THC0290_N_1551	THC0290_N_1551	7.36407	7.50097	8.86722	8.78686	9.60601	9.96205	9.65279	10.6131	10.0316	10.4723	8.69372	8.89853	10.5864	10.6691	9.66371	9.75911	11.3149	11.6454	11.7719	11.8441	7.10383	7.38787	6.49242	6.24775	6.34825	5.65744	8.35741	8.4769	7.62336	7.78485	8.24882	7.85926	9.25034	8.8575	8.23158	8.11531	7.50097	7.84076
THC0290_2361	2731266	2732366	-1	smf	THC0290_v2_2475	smf	Protein Smf of unknown function	1101	1	THC0290_N_1551	THC0290_N_1551	8.64577	8.5013	8.17486	7.96205	7.33006	7.26049	7.05011	6.95491	7.08043	7.07162	8.37169	8.18646	7.54121	7.01765	6.99509	6.8775	7.31401	6.53405	7.89454	9.02224	8.41061	8.51714	8.74291	8.61787	8.4769	8.62998	7.69814	7.66055	7.8161	7.77789	8.26819	8.13533	6.99509	7.03724	8.15993	8.18021	8.19676	8.09694
THC0290_2362	2732472	2733425	1		THC0290_v2_2476		Protein of unknown function	954	1	THC0290_N_1552	THC0290_N_1552	12.0882	12.125	12.5349	12.5916	13.2543	13.2868	13.3153	14.2737	13.4681	13.422	12.3892	12.4812	12.8578	12.4602	12.5731	12.8722	12.166	12.9884	13.0255	12.3751	12.1334	12.3158	11.859	11.8401	11.6801	11.7088	12.7991	12.8163	12.372	12.4482	12.2788	12.3285	12.3459	12.5312	12.4524	12.2556	12.2305	12.2788
THC0290_2386	2758036	2758434	-1		THC0290_v2_2503		Probable transmembrane protein of unknown function	399	1	THC0290_N_1572	THC0290_N_1572	8.56504	8.63692	8.44854	8.61446	8.57585	8.48494	8.42311	10.1605	8.73926	9.11344	8.81696	8.64953	9.64283	9.26691	8.82798	8.62601	7.69814	8.81362	9.04353	6.69899	8.63692	8.96922	8.24882	8.24476	8.66789	8.49708	8.43288	8.48874	9.44245	9.7356	8.56865	8.46538	8.77485	8.82446	8.49259	8.4769	8.65311	8.70841
THC0290_2390	2761805	2762857	1	paaE	THC0290_v2_2507	paaE	Probable phenylacetic acid degradation NADH oxidoreductase PaaE	1053	1	THC0290_N_1573	THC0290_N_1573	11.3706	11.2793	11.5192	11.4565	11.9182	11.8538	11.9795	12.366	12.5877	12.4039	11.3405	11.3984	12.0542	11.9356	11.9902	11.8538	11.6604	11.6855	11.8905	11.5283	11.3489	11.3547	11.3508	11.1719	11.1653	10.9719	11.6285	11.6191	11.0209	11.1028	11.4435	11.3526	12.0294	12.156	11.2655	11.5148	11.3526	11.4953
THC0290_2391	2763167	2764210	-1		THC0290_v2_2508		Probable heptosyltransferase involved in lipopolysaccharide core biosynthesis	1044	1	THC0290_N_1574	THC0290_N_1574	10.2481	10.2481	10.256	10.256	10.4828	10.7965	10.6179	10.4042	10.5588	10.6405	10.4222	10.4368	10.3895	10.3425	10.4917	10.5467	10.2646	10.3856	10.4786	9.7356	10.2347	10.4532	10.4452	10.402	10.5045	10.7248	10.4653	10.5258	10.1187	10.1097	10.195	10.4431	10.7465	10.6001	10.256	10.2347	10.2133	10.3759
THC0290_2394	2765590	2766522	-1		THC0290_v2_2511		Probable transmembrane protein of unknown function	933	1	THC0290_N_1577	THC0290_N_1577	9.03179	8.99756	8.58089	8.51267	8.53888	8.92765	8.61787	9.93113	9.20776	9.07688	8.5475	8.36212	9.16622	8.98525	8.48093	8.73926	6.44732	8.16952	8.27761	6.83835	9.15163	9.18703	9.27554	9.18091	9.58662	9.33523	9.08704	9.03179	8.8496	9.02224	8.66019	9.03741	8.21639	8.5475	8.89853	8.97258	9.04041	9.43407
THC0290_2395	2766792	2768066	-1	purD	THC0290_v2_2513	purD	Phosphoribosylamine--glycine ligase	1275	2	THC0290_N_1580	THC0290_N_1579;THC0290_N_1580	11.6308	11.498	11.18	11.1138	11.1266	11.2159	11.1595	11.1028	11.9069	11.8328	11.0556	11.1138	11.2251	11.5397	11.1977	11.2295	10.8026	11.0374	11.1635	10.943	11.3238	11.6454	11.6357	11.4246	11.8401	11.597	11.4591	11.4176	10.7925	11.2393	11.3867	11.4738	11.0312	10.9492	11.4223	11.4111	11.4714	11.4912
[truncated: 26 more columns]

## Sheet: asRNAs
Locustag	Start	End	Strand	Classif	Gene_context	Length	NfeatAS	NfeatAS.newregions	NfeatAS.CDSs	CumLengthAS.CDSs	NfeatAS.others	AS.ltag.main	AS.ltag.all	cdsprednumber	cdspredinfo	cdspredproba	cdspredoverlapbp	cdspredaaseq	T1_a	T1_c	T2_a	T2_c	T3_a	T3_c	T4_a	T4_c	T5_a	T5_c	T2-FCS_a	T2-FCS_b	TYESA-FCS_a	TYESA-FCS_b	TYESA_a	TYESA_b	TYESA-0.5_a	TYESA-0.5_b	TYESA-0.2_a	TYESA-0.2_b	CS3_a	CS3_c	Temp10C_a	Temp10C_c	Temp4C_a	Temp4C_c	DIP_a	DIP_c	NaCl_a	NaCl_c	CS1_a
THC0290_N_0004	4241	4559	1	3prime-PT	NA	319	3	1	1	138	1	THC0290_0004	THC0290_0004;THC0290_N_0005;THC0290_tRNA_0001	0	NA	NA	NA	-	5.56655	5.68052	5.12225	6.19179	5.92337	6.98243	6.31649	8.38607	6.59949	7.20601	5.4884	6.34475	7.83609	8.06347	7.39674	6.73946	3.98393	8.64333	8.8213	8.45004	6.32472	5.94459	5.62752	6.22133	5.64748	6.43775	5.62955	6.21054	7.0491	7.22798	5.97294
THC0290_N_0006	5284	5631	-1	indep	NA	348	1	0	1	348	0	THC0290_0005	THC0290_0005	0	NA	NA	NA	-	4.71166	5.0521	5.60193	5.66472	5.87074	6.56111	6.02909	7.62544	6.78405	7.87163	5.74593	5.11774	8.09717	5.98825	7.20358	7.29275	7.0231	7.59256	8.71736	6.71406	4.33081	5.13741	4.9917	5.22313	4.22386	5.04075	5.90602	5.84416	6.67381	7.28573	4.78123
THC0290_N_0007	8197	8243	-1	3prime	NA(CDS:THC0290_0009)	47	1	0	1	26	0	THC0290_0008	THC0290_0008	0	NA	NA	NA	-	3.89303	3.89182	3.87233	3.85333	3.85333	3.86548	3.86649	6.3261	7.11308	6.65311	3.85333	3.95219	5.84368	3.87448	3.85333	4.00732	8.01108	7.41356	3.96052	4.40456	4.00568	3.85333	3.97594	3.87655	3.90444	3.85973	3.88604	3.9354	3.85333	4.01419	3.85333
THC0290_N_0008	8228	8499	1	3prime-PT	NA	272	1	0	1	256	0	THC0290_0009	THC0290_0009	0	NA	NA	NA	-	5.96456	5.64228	6.02195	6.28116	7.09425	8.16832	8.55108	10.2962	9.27238	9.9282	6.00793	5.43886	9.74407	9.56103	8.08382	8.17676	8.94311	9.49473	10.6752	10.4954	5.98734	5.88411	5.50203	5.75517	5.63845	5.98431	6.17784	6.1407	6.99704	7.1737	5.63669
THC0290_N_0010	10630	10929	1	indep	NA	300	1	0	1	265	0	THC0290_0010	THC0290_0010	0	NA	NA	NA	-	4.87378	4.5736	5.26827	5.66637	5.92002	6.23573	6.32217	8.70655	7.36864	7.51751	5.21971	5.28964	7.99699	6.3967	7.31723	7.13132	6.47133	6.64168	8.64521	6.10545	4.60019	5.14193	4.26161	4.21764	3.97388	4.0879	4.52285	4.47814	7.05245	7.0804	5.03475
THC0290_N_0028	48179	48337	1	3prime	elaA(CDS:THC0290_0029)	159	1	0	1	159	0	THC0290_0030	THC0290_0030	0	NA	NA	NA	-	7.50823	7.40522	7.45956	7.60137	8.34203	8.4812	8.68099	10.1008	9.25188	8.76202	7.45854	7.12779	9.23854	9.13804	7.78811	7.69626	3.87432	8.44224	6.35043	7.0987	7.25719	7.57367	7.07354	6.76572	6.79631	6.78828	7.65583	7.83326	8.20246	8.23423	7.42723
THC0290_N_0039	69429	69507	1	indep	NA	79	1	0	1	79	0	THC0290_0047	THC0290_0047	0	NA	NA	NA	-	4.45789	3.96756	5.23833	3.98761	4.87268	6.09012	6.15259	9.15729	7.65768	7.75759	4.82556	5.46446	9.22047	9.55348	8.34278	8.76842	11.1744	10.6031	11.6012	12.7881	3.938	5.73332	3.97601	3.96614	4.12563	4.28131	6.08708	5.83537	4.61675	5.74045	4.60693
THC0290_N_0043	78654	78915	-1	3prime	NA(CDS:THC0290_0057)	262	1	0	1	254	0	THC0290_0056	THC0290_0056	0	NA	NA	NA	-	4.8612	4.82949	4.25346	4.84231	4.76663	6.0285	5.90375	8.13294	6.56772	7.08471	4.7191	4.5479	6.30905	6.69875	6.91469	5.70644	6.49868	6.47772	7.64566	3.93187	4.98904	4.54616	4.39932	4.40089	4.88868	4.65975	5.19747	4.48218	5.11433	4.74212	4.60253
THC0290_N_0044	78908	78989	1	3prime	crt(CDS:THC0290_0056)	82	1	0	1	74	0	THC0290_0057	THC0290_0057	0	NA	NA	NA	-	5.91843	5.90443	5.49404	5.7354	6.64928	7.15161	7.06869	8.04753	6.23798	7.32132	5.75354	5.30231	7.05231	3.87343	5.66823	5.76863	3.90397	3.87685	8.67388	3.90693	5.50057	5.82335	4.99792	5.4311	5.24428	5.94021	5.47307	5.56871	5.31371	5.54083	5.65131
THC0290_N_0045	78990	79546	1	3prime-PT	NA	557	1	0	1	557	0	THC0290_0057	THC0290_0057	0	NA	NA	NA	-	7.38417	7.12945	7.04676	7.18987	8.10771	8.40739	8.89971	9.01738	7.91544	7.64397	7.02464	6.75451	6.52168	3.89575	7.20663	7.7552	4.0638	7.03639	5.67963	3.87518	7.29953	7.30297	6.7566	6.94056	6.96782	7.18254	7.25573	7.53031	7.06388	7.11487	7.043
THC0290_N_0051	87874	88509	1	3prime	NA(CDS:THC0290_0066)	636	1	0	1	636	0	THC0290_0067	THC0290_0067	0	NA	NA	NA	-	7.75882	7.9707	7.4974	7.70019	7.79893	7.74225	7.5229	8.6154	6.90535	7.05501	7.57107	7.43988	5.79413	6.36316	6.16147	5.72438	5.10057	3.9728	4.3397	3.87849	7.94797	7.79242	7.49786	7.24944	6.99719	7.2491	8.06203	7.99744	7.75339	8.28146	7.65838
THC0290_N_0063	106984	108354	1	repeated_region	NA	1371	1	0	1	492	0	THC0290_0083	THC0290_0083	1	107294,107386,+	0.996	93	MTTSSINIPVFFKAKLVLMPFYYPILGLLL	9.5021	9.5899	10.3269	10.4386	10.5337	10.485	10.7493	9.48418	9.12261	8.91675	10.4704	10.3767	9.34662	9.16794	9.89488	9.85923	10.1159	9.96187	9.96183	10.0654	9.30554	9.07589	9.59991	9.7799	9.7023	9.75248	9.2066	8.91208	10.3651	10.1352	9.9978
THC0290_N_0070	115149	115324	1	3prime	yeeZ(CDS:THC0290_0089)	176	2	1	1	151	0	THC0290_0090	THC0290_0090;THC0290_N_0069	0	NA	NA	NA	-	4.63174	4.89391	4.56275	5.1202	4.77462	6.3958	6.1505	7.53751	7.18515	7.72696	4.50486	4.79564	6.23944	4.36196	5.0564	4.3612	6.70526	7.0224	6.48001	4.76315	5.30597	4.20115	4.63751	4.78255	5.05515	4.75617	5.23391	5.19819	4.32592	4.84802	5.04078
THC0290_N_0080	136276	136338	1	indep	NA	63	1	0	1	63	0	THC0290_0107	THC0290_0107	0	NA	NA	NA	-	NA	NA	NA	NA	NA	NA	NA	NA	NA	NA	NA	NA	NA	NA	NA	NA	NA	NA	NA	NA	NA	NA	NA	NA	NA	NA	NA	NA	NA	NA	NA
THC0290_N_0091	162010	162767	1	3prime	NA(CDS:THC0290_0130)	758	3	1	2	560	0	THC0290_0131	THC0290_0131;THC0290_0132;THC0290_N_0092	0	NA	NA	NA	-	7.21589	7.07838	7.1484	7.30544	7.59775	7.70781	8.2967	8.68088	8.62013	8.43571	7.09571	6.76751	7.67986	7.12906	7.31503	7.58139	4.11537	4.40613	5.18618	5.79847	6.98967	7.17162	6.93649	7.55179	6.95849	7.27643	7.03309	6.96376	6.97444	7.10729	6.57457
THC0290_N_0095	164214	164791	-1	repeated_region	NA	578	1	0	1	514	0	THC0290_0134	THC0290_0134	0	NA	NA	NA	-	8.62852	8.33661	8.25357	7.91955	6.93436	6.74373	7.06016	5.79064	5.42328	4.31128	8.29682	8.12622	8.3047	6.64044	8.83615	8.33236	8.01072	7.82905	6.63759	5.92345	9.22961	8.78791	8.22134	9.19337	8.19846	8.69279	7.76926	7.87479	10.3044	9.73029	8.07016
THC0290_N_0096	164809	165563	1	3prime	NA(CDS:THC0290_0134)	755	1	0	1	727	0	THC0290_0135	THC0290_0135	0	NA	NA	NA	-	7.00466	7.06794	7.02635	7.26968	7.10735	7.06252	7.18995	7.64614	7.49316	7.26972	7.18575	6.8473	6.81122	4.83599	6.33857	6.33556	5.74499	4.31806	6.98148	4.83138	7.11522	6.78812	6.92519	7.32026	6.58155	7.02523	6.3885	6.45726	6.68666	5.98558	6.43811
THC0290_N_0109	184225	184363	1	indep	NA	139	1	0	1	139	0	THC0290_0150	THC0290_0150	0	NA	NA	NA	-	6.70059	6.8212	6.78892	7.27026	7.40699	7.3234	7.5479	9.15243	8.51426	7.99092	7.03087	7.2417	8.25459	9.88603	8.80715	7.85111	10.6906	8.679	9.57826	11.0303	6.69114	6.78316	7.09773	6.24935	6.50734	6.03693	6.93574	6.88976	7.37102	7.34695	6.44867
THC0290_N_0123	198042	198354	-1	3prime	NA(CDS:THC0290_0160)	313	1	0	1	313	0	THC0290_0159	THC0290_0159	0	NA	NA	NA	-	7.86557	8.17778	8.14616	8.41236	8.77168	8.21039	8.85446	7.93722	8.17872	7.85266	8.5307	8.5832	6.60057	6.29197	6.05679	6.77527	5.25854	5.31553	3.94442	3.88478	8.14331	8.09354	7.88165	7.75593	7.97492	8.20578	8.223	8.19425	9.16267	9.04572	7.95686
THC0290_N_0124	198359	198406	1	3prime	NA(CDS:THC0290_0159)	48	1	0	1	48	0	THC0290_0160	THC0290_0160	0	NA	NA	NA	-	4.72179	5.23218	4.66165	5.01284	4.78298	4.62835	5.46626	6.92734	5.0797	5.33288	4.35477	4.64525	4.29411	4.4476	6.61548	4.07182	6.86979	4.95021	4.71223	3.99687	5.32666	5.32779	4.4494	4.92718	3.94177	4.83134	4.24196	4.46467	4.12026	4.00886	4.42855
THC0290_N_0132	210722	211077	-1	3prime	NA(CDS:THC0290_0167)	356	1	0	1	356	0	THC0290_0166	THC0290_0166	0	NA	NA	NA	-	9.4408	9.33004	8.70086	8.59736	8.34875	8.30317	8.4087	8.66965	7.2424	7.25013	8.57442	8.35522	7.90113	7.3511	7.81109	7.41802	7.14561	7.35156	8.39658	5.23672	9.59893	9.76042	9.53735	9.76837	9.558	9.84995	9.17545	9.19497	9.6186	9.83477	8.71695
THC0290_N_0133	211082	211240	1	3prime	NA(CDS:THC0290_0166)	159	1	0	1	159	0	THC0290_0167	THC0290_0167	0	NA	NA	NA	-	6.85283	6.11364	6.67949	6.78658	7.3387	7.98722	7.86557	10.3052	9.09523	8.79205	6.7552	6.31117	8.66636	8.4707	7.95323	7.80457	9.4718	8.41028	9.5002	10.3249	6.27348	6.67468	5.9577	6.26297	6.39883	6.40815	6.21238	6.75253	6.3408	6.58985	6.08161
THC0290_N_0145	237710	238051	-1	3prime	NA(CDS:THC0290_0190)	342	2	1	1	270	0	THC0290_0189	THC0290_0189;THC0290_N_0146	0	NA	NA	NA	-	7.01023	6.96342	7.09593	7.09155	6.84544	7.23307	6.58332	7.43556	5.62795	5.93364	7.45831	7.08905	6.43088	3.9591	4.04254	3.88077	3.89756	4.43701	3.9035	5.17774	6.95981	7.16711	6.07989	6.58304	6.18466	6.49496	6.84126	6.96655	7.23915	7.40164	6.08408
THC0290_N_0146	237980	238652	1	3prime	NA(CDS:THC0290_0189)	673	3	1	2	602	0	THC0290_0190	THC0290_0190;THC0290_0191;THC0290_N_0145	0	NA	NA	NA	-	8.63918	8.54009	7.26102	7.13065	6.63099	6.94275	6.79537	8.21947	6.65859	6.64743	7.25616	6.76168	4.52021	4.84674	3.96995	4.151	5.76736	4.4231	6.48522	3.99941	8.62439	8.33898	8.32533	8.35131	8.33058	8.60543	7.49792	7.61363	7.61466	7.73948	8.42243
THC0290_N_0149	245600	246251	-1	repeated_region	NA	652	3	2	1	292	0	THC0290_0197	THC0290_0197;THC0290_N_0150;THC0290_N_0151	1	245961,246047,-	0.688	87	MQTQNLQNHDVLDLIELDNLKKRFKKKG	6.85409	6.82318	6.47473	6.57205	7.01955	7.70942	7.41012	7.51218	7.62011	7.88112	6.71221	6.11917	8.6291	8.01051	7.71708	7.4209	7.59538	8.26726	9.23287	8.81372	6.99267	6.8599	6.91327	7.41084	6.89055	7.29332	6.83897	6.76556	6.77416	6.42843	6.12254
THC0290_N_0154	250753	251441	1	3prime	NA(CDS:THC0290_0200)	689	2	1	1	434	0	THC0290_0201	THC0290_0201;THC0290_N_0155	0	NA	NA	NA	-	8.84139	8.72905	8.81986	8.97888	9.17034	9.34426	9.65917	11.6876	10.6904	10.5717	8.73035	8.78907	9.6183	9.19662	9.7739	9.94838	9.21456	9.63568	10.2629	9.41418	9.12026	8.93559	8.48575	8.64823	8.30595	8.76363	8.87884	8.9854	10.424	10.6287	9.21207
THC0290_N_0160	255408	255603	1	indep	NA	196	1	0	1	188	0	THC0290_0205	THC0290_0205	0	NA	NA	NA	-	6.55277	6.40732	6.70161	6.74235	6.90203	7.02992	7.29416	7.84059	7.54669	7.33952	6.8834	6.59787	6.74755	7.65028	7.45973	7.08211	8.11646	8.07012	8.47613	7.4237	6.43353	6.64077	6.5663	6.63256	6.55848	6.53556	6.76968	6.96654	6.33561	6.32722	6.44769
THC0290_N_0165	260291	260539	-1	3prime	NA(CDS:THC0290_0211)	249	2	1	1	93	0	THC0290_0210	THC0290_0210;THC0290_N_0166	0	NA	NA	NA	-	10.1426	10.1545	9.4061	9.73353	9.17022	9.38557	8.97755	9.83846	9.97241	10.0152	9.8766	9.37986	9.03028	10.6377	10.0424	9.49594	10.9197	10.5572	10.9815	10.9107	9.97445	9.94846	9.41985	9.36308	9.27312	9.4243	9.15753	9.47781	9.65178	9.76064	9.49486
THC0290_N_0169	266572	266801	1	indep	NA	230	1	0	1	230	0	THC0290_0218	THC0290_0218	0	NA	NA	NA	-	8.52592	8.39366	7.83221	8.10885	7.78704	8.1896	8.06459	7.93615	9.81223	9.33277	8.09946	7.83039	9.79627	10.712	9.65745	9.17165	11.5028	11.0428	11.4643	12.624	8.29493	8.41446	8.66286	9.03048	8.91715	8.92425	7.81389	7.82098	8.23619	8.19016	7.87561
THC0290_N_0173	274351	274462	-1	3prime	ygfA(CDS:THC0290_0226)	112	1	0	1	112	0	THC0290_0225	THC0290_0225	0	NA	NA	NA	-	5.40209	5.57447	6.16922	6.05099	6.23663	6.75775	6.32254	7.47043	6.50896	6.82308	6.14725	6.02187	5.94777	6.39459	7.67675	4.23921	3.85957	7.18488	10.2539	7.31773	5.69943	5.41889	5.58926	4.60123	4.90985	5.32643	6.58394	6.25606	5.32717	6.02771	5.63552
THC0290_N_0174	274463	274834	1	3prime	lspA(CDS:THC0290_0225)	372	1	0	1	372	0	THC0290_0226	THC0290_0226	0	NA	NA	NA	-	8.77793	8.66799	8.18385	8.14625	8.68759	8.64811	9.19357	10.2593	9.71621	9.76655	8.10632	8.04087	9.35435	9.84734	9.31828	8.86857	9.43803	8.87945	9.72694	10.0936	9.08748	9.32164	8.56727	8.87779	8.69033	8.90392	8.38694	8.54762	9.0795	9.13913	8.44994
THC0290_N_0184	297507	297566	1	indep	NA	60	1	0	1	60	0	THC0290_0241	THC0290_0241	0	NA	NA	NA	-	15.0393	14.9945	14.75	14.8347	14.7334	14.7967	15.2786	14.2759	15.2124	14.7267	14.6865	14.6323	14.8043	15.9192	15.7872	15.2312	16.0701	15.4508	15.4003	16.064	15.2318	14.8411	15.0576	15.2719	15.1342	15.0122	14.796	14.8717	15.4626	14.7059	14.9125
THC0290_N_0186	300171	300903	1	3prime	NA(CDS:THC0290_0244)	733	1	0	1	624	0	THC0290_0245	THC0290_0245	0	NA	NA	NA	-	6.13286	5.66771	5.95565	6.19297	6.71246	7.65348	7.56259	9.41233	8.61039	9.3034	6.04393	5.29512	9.61411	8.09725	8.39563	8.10919	7.92383	9.32834	10.6565	9.29696	6.25842	5.7993	5.52413	6.09699	6.02466	6.03916	6.32069	6.32666	6.22133	6.17279	5.31634
THC0290_N_0200	323909	323965	-1	3prime	NA(CDS:THC0290_0266)	57	1	0	1	42	0	THC0290_0265	THC0290_0265	0	NA	NA	NA	-	7.20347	7.0947	7.18734	6.89152	6.65931	6.57597	5.41718	8.21849	6.63056	6.43965	7.48902	7.24442	5.9693	8.06493	4.81489	6.59403	3.92912	5.74777	4.8379	3.9248	7.2911	7.52059	6.51928	6.61875	7.05971	6.8084	7.02944	6.79156	7.06066	7.1332	6.49531
THC0290_N_0201	323951	324107	1	3prime	NA(CDS:THC0290_0265)	157	1	0	1	142	0	THC0290_0266	THC0290_0266	0	NA	NA	NA	-	4.05407	3.91993	3.902	3.88394	4.47593	4.0417	4.40498	7.54632	3.93176	3.85333	3.97432	3.95219	5.18624	4.01	3.85333	4.08947	4.01343	6.03454	4.13925	3.85333	3.85333	3.9843	3.92983	3.9301	3.94095	4.06944	3.98604	3.88859	4.0958	4.3146	3.91732
THC0290_N_0222	372045	372409	1	3prime	NA(CDS:THC0290_0305)	365	1	0	1	355	0	THC0290_0306	THC0290_0306	0	NA	NA	NA	-	10.027	9.89539	9.13102	9.55152	9.58106	9.46641	9.36239	9.99738	10.0899	9.4387	9.37245	9.34029	10.9482	11.6021	10.314	9.68929	11.176	10.8906	10.5055	10.9244	10.2718	10.1385	10.2751	10.039	10.2906	10.055	9.03957	9.00786	9.90255	10.1496	8.99183
THC0290_N_0227	380006	380541	1	3prime-PT	NA	536	2	1	1	511	0	THC0290_0311	THC0290_0311;THC0290_N_0225	0	NA	NA	NA	-	6.35842	6.30523	5.28672	5.55418	5.39302	6.88764	6.18627	7.93583	7.60011	7.65741	5.25045	4.78809	7.25598	6.46696	4.07282	5.09423	7.46631	7.80185	7.88452	5.31363	6.95998	7.01725	6.28053	6.90053	5.78598	6.44226	5.36643	5.20778	5.33725	5.424	5.24649
THC0290_N_0235	393012	393683	-1	3prime	NA(CDS:THC0290_0322)	672	1	0	1	672	0	THC0290_0321	THC0290_0321	0	NA	NA	NA	-	7.89127	7.7151	6.87766	7.18199	6.54765	7.01539	6.57813	8.2214	6.69846	6.5319	7.19959	6.59062	7.25199	6.3496	5.6537	6.05259	6.45941	6.4611	7.96322	3.99635	7.97848	7.9189	6.27421	6.89149	5.93798	6.51039	6.2657	5.88622	7.74922	7.60766	6.31336
THC0290_N_0238	397725	397782	-1	indep	NA	58	1	0	1	58	0	THC0290_0327	THC0290_0327	0	NA	NA	NA	-	NA	NA	NA	NA	NA	NA	NA	NA	NA	NA	NA	NA	NA	NA	NA	NA	NA	NA	NA	NA	NA	NA	NA	NA	NA	NA	NA	NA	NA	NA	NA
THC0290_N_0241	399232	399754	-1	3prime	NA(CDS:THC0290_0330)	523	2	1	1	105	0	THC0290_0329	THC0290_0329;THC0290_N_0242	0	NA	NA	NA	-	7.07189	6.90918	6.68919	6.56234	7.16224	7.97905	7.48577	8.55281	8.75677	9.41095	7.11098	6.61065	10.2403	10.2915	9.24398	9.17387	9.89697	10.2601	10.4835	9.37358	6.99185	7.71271	6.89409	6.8821	7.20395	7.48024	7.44638	7.43135	7.14456	7.74785	6.66218
THC0290_N_0247	416229	416973	-1	3prime	porT(CDS:THC0290_0339)	745	1	0	1	725	0	THC0290_0338	THC0290_0338	0	NA	NA	NA	-	7.86212	7.47493	6.88086	7.19376	7.16904	7.24235	7.61807	7.59242	6.76711	6.20194	7.5578	6.97968	7.14892	4.07613	6.20904	6.4346	4.00473	5.0704	5.38066	3.87781	8.23801	8.03862	6.87883	7.49157	6.97393	7.24941	6.85209	7.36909	9.00363	8.7425	6.99346
THC0290_N_0257	430687	430866	1	indep	NA	180	1	0	1	170	0	THC0290_0351	THC0290_0351	0	NA	NA	NA	-	5.97581	6.00513	5.92313	6.08366	6.29757	7.06588	6.57945	9.18739	7.32378	8.43934	5.87763	5.53076	8.77639	9.13685	5.80747	5.34159	6.72241	9.09809	9.27379	7.21545	6.29884	6.77877	6.79975	6.3923	6.90923	6.16721	5.38036	5.46233	5.61683	5.8782	5.99733
THC0290_N_0263	441466	441936	-1	3prime-PT	NA	471	1	0	1	316	0	THC0290_0358	THC0290_0358	0	NA	NA	NA	-	7.38097	7.50089	7.62294	7.73697	9.32745	9.77086	10.339	10.7761	10.7205	10.4586	7.55162	7.24573	9.9375	10.0695	9.25726	9.01969	10.1052	10.3035	10.8832	9.09817	7.62583	7.47976	7.56348	7.16854	7.6141	7.85554	8.21209	8.40669	8.12266	8.11711	7.47649
THC0290_N_0264	441896	442163	1	indep	NA	268	3	2	1	194	0	THC0290_0359	THC0290_0359;THC0290_N_0263;THC0290_N_0265	0	NA	NA	NA	-	5.0229	4.63456	4.9058	5.21909	5.74909	7.37867	6.17273	8.71415	6.64381	9.14423	4.82522	4.54133	9.32594	6.71343	6.81421	5.6853	6.53227	9.46999	9.48086	4.00289	5.37627	5.1767	4.45103	4.55668	4.24111	4.37328	4.84941	4.7845	4.28199	4.34288	5.82693
THC0290_N_0269	448689	448837	-1	3prime-PT	NA	149	2	1	1	121	0	THC0290_0366	THC0290_0366;THC0290_N_0270	0	NA	NA	NA	-	5.42743	5.35293	6.1182	6.3224	7.40496	8.02812	8.91835	10.021	10.7147	11.0156	6.29626	5.30859	13.1076	13.0568	12.0499	11.2004	13.6155	13.6998	13.0486	13.4207	5.93151	5.72084	5.30283	5.02048	5.25045	5.06405	6.93545	6.9332	6.11987	5.9401	5.87411
THC0290_N_0272	448862	449419	1	3prime-PT	NA	558	3	2	1	351	0	THC0290_0367	THC0290_0367;THC0290_N_0271;THC0290_N_0273	0	NA	NA	NA	-	9.50552	9.2668	8.73976	9.06205	8.70889	8.45195	9.00339	10.0204	8.40077	8.91962	8.9549	8.66475	10.463	9.81036	9.13548	7.7389	9.78046	10.8698	11.181	10.5154	9.43271	9.46865	9.596	9.85235	9.34709	9.62733	8.89271	9.07854	9.61727	9.73625	8.58814
THC0290_N_0276	465495	465656	-1	3prime	NA(CDS:THC0290_0383)	162	2	1	1	71	0	THC0290_N_0277	THC0290_0382;THC0290_N_0277	0	NA	NA	NA	-	6.56221	6.56462	6.49332	6.61747	7.3197	7.72636	7.82308	8.88199	6.78399	7.4486	6.33573	6.232	7.04413	6.47492	7.0765	7.11126	7.83755	3.85795	3.90774	3.85333	6.58657	6.66859	6.59904	6.98313	6.69874	6.86501	7.43708	7.47875	7.52103	7.34202	6.53874
THC0290_N_0277	465566	466070	1	3prime	ogt2(CDS:THC0290_0382)	505	2	1	1	390	0	THC0290_0383	THC0290_0383;THC0290_N_0276	0	NA	NA	NA	-	7.37447	7.14399	5.96272	6.31686	5.81923	6.74077	5.99462	8.329	5.44348	6.41941	6.41787	5.55971	3.9427	3.96364	4.03433	4.50716	5.37102	4.26097	4.28782	3.98215	7.42546	7.19315	6.42131	7.48696	6.69859	7.02315	6.09637	6.289	6.49878	6.7924	6.04073
THC0290_N_0282	478559	479025	1	3prime	NA(CDS:THC0290_0392)	467	1	0	1	467	0	THC0290_0393	THC0290_0393	0	NA	NA	NA	-	8.98284	8.77604	8.38924	8.45361	8.52844	8.71214	9.20999	10.3695	9.82559	9.41737	8.48927	8.13516	9.43556	9.9694	9.21477	8.94107	9.27409	8.92144	10.1018	9.93041	9.10446	9.19534	8.84648	9.13771	9.23802	9.06288	8.39623	8.59259	8.93208	8.73443	8.45959
THC0290_N_0284	481943	482257	1	indep	NA	315	1	0	1	306	0	THC0290_0395	THC0290_0395	0	NA	NA	NA	-	14.9054	14.8352	15.5167	15.6767	15.7555	15.8968	15.6189	15.4564	16.2368	16.3403	15.2081	15.2996	16.2613	16.1953	15.8422	15.2936	15.7259	15.9274	15.8302	15.8212	14.8338	14.9377	14.9342	14.9465	14.9096	14.9456	15.2022	15.3445	15.2405	15.4556	15.2551
THC0290_N_0285	482258	482799	1	3prime	NA(Region:THC0290_N_0284)	542	1	0	1	325	0	THC0290_0396	THC0290_0396	0	NA	NA	NA	-	6.5554	6.79286	6.49563	6.35482	6.72431	6.98697	7.29271	7.1164	7.99508	7.79156	6.15935	6.00526	8.13332	8.15095	8.34424	8.0122	6.64426	7.757	8.42022	8.98304	6.91112	6.66582	6.50184	6.90306	6.64479	6.4081	7.1146	6.70674	7.5185	7.52984	6.66341
THC0290_N_0290	487606	488796	1	3prime	NA(CDS:THC0290_0399)	1191	1	0	1	1139	0	THC0290_0400	THC0290_0400	0	NA	NA	NA	-	7.27246	7.15639	7.07263	6.96158	7.64758	7.38905	8.27978	8.94967	8.18126	8.02991	7.00438	6.6138	9.14455	9.14958	9.44574	9.0435	8.60605	8.54124	8.24171	7.16508	7.50151	7.42204	7.18683	7.97545	7.15713	7.66298	7.26823	7.27763	8.43165	7.80525	6.98853
THC0290_N_0292	493173	493641	-1	3prime	NA(CDS:THC0290_0403)	469	2	1	1	210	0	THC0290_N_0293	THC0290_0402;THC0290_N_0293	0	NA	NA	NA	-	6.46917	6.68221	6.45521	6.79534	7.14179	7.10502	7.27335	7.64777	6.82418	7.18343	6.42995	6.55956	3.85333	3.86964	5.65931	5.69173	4.14783	3.97737	3.92989	3.87445	6.89023	6.66222	6.26437	6.50535	6.15991	6.41895	7.25542	7.20737	5.70521	6.00205	6.0909
THC0290_N_0293	493383	493951	1	3prime	NA(CDS:THC0290_0402)	569	2	1	1	310	0	THC0290_0403	THC0290_0403;THC0290_N_0292	0	NA	NA	NA	-	7.13539	6.56342	6.21172	6.50333	6.814	6.75858	6.66591	8.61509	6.53042	7.37278	6.7608	6.13277	7.65716	7.47649	7.15091	6.21208	7.37418	6.48437	6.80903	4.74893	6.96041	7.16386	6.57788	7.10259	7.32604	7.33823	7.03539	6.66733	8.04622	8.27917	6.15203
THC0290_N_0295	496366	496703	-1	3prime	kdtA(CDS:THC0290_0406)	338	1	0	1	303	0	THC0290_0405	THC0290_0405	0	NA	NA	NA	-	5.92339	6.0888	5.76999	5.89875	5.94326	6.18401	5.66311	7.29866	6.35006	4.47657	6.0418	5.48399	4.45805	3.88489	3.9622	3.91192	4.05782	6.47815	7.03188	3.96407	5.68349	6.63233	5.57332	6.24532	5.93236	6.03445	5.93186	6.04588	5.83946	5.84899	5.31444
THC0290_N_0322	539143	539314	-1	3prime	NA(CDS:THC0290_0445)	172	1	0	1	170	0	THC0290_0444	THC0290_0444	0	NA	NA	NA	-	7.82921	7.94252	8.66366	8.917	9.73957	9.34784	9.74369	11.9254	10.1719	9.81685	8.33356	8.47167	8.30143	8.75031	9.23236	8.63775	7.70931	7.83223	8.65101	6.21629	7.91099	8.04663	8.62536	8.42928	8.41927	8.59428	8.57292	8.9306	8.61939	8.62963	8.05044
THC0290_N_0323	539313	539818	1	3prime	NA(CDS:THC0290_0444)	506	1	0	1	504	0	THC0290_0445	THC0290_0445	0	NA	NA	NA	-	4.79425	4.45944	4.41452	4.74878	4.06656	5.10682	4.30697	7.78369	3.85333	5.17254	4.2007	4.44367	3.90064	3.85874	3.85333	4.14034	3.87315	3.85333	3.90585	3.85552	4.03893	5.1596	3.95246	4.38714	3.94135	4.37239	3.91492	3.97186	4.46854	4.51888	4.41851
THC0290_N_0328	553432	553812	1	3prime-PT	NA	381	2	1	1	163	0	THC0290_N_0326	THC0290_0456;THC0290_N_0326	0	NA	NA	NA	-	7.45966	7.63995	8.08202	7.89534	8.85969	9.52839	8.75422	9.33735	8.22931	8.75697	8.10054	7.95865	7.75531	7.64336	6.5023	6.78231	5.63879	7.53187	8.19264	8.36359	7.91574	7.74478	7.81195	7.18528	7.45705	8.38293	8.10274	7.88464	8.64686	9.09332	7.73372
THC0290_N_0335	563975	564212	-1	3prime	NA(CDS:THC0290_0467)	238	1	0	1	193	0	THC0290_0466	THC0290_0466	0	NA	NA	NA	-	6.56056	6.53089	6.54671	6.61576	6.20648	7.10674	6.17775	7.12011	7.29684	6.54386	6.86572	6.76912	7.87471	5.90795	4.43497	5.713	5.75187	6.05987	8.82885	8.87673	6.96	7.0248	6.46254	7.01642	6.69022	6.9024	6.88144	6.7107	6.42006	6.29037	6.71212
THC0290_N_0336	564168	564864	1	3prime	NA(CDS:THC0290_0466)	697	1	0	1	652	0	THC0290_0467	THC0290_0467	0	NA	NA	NA	-	8.70032	8.09798	7.71059	8.10208	8.3378	7.41563	8.31986	7.22978	9.56748	9.31262	7.91013	8.1168	10.5966	11.4211	10.1617	9.53897	10.8461	10.3818	10.2708	9.82179	8.54816	8.30343	8.18487	8.43289	8.18692	8.40366	8.25168	8.24018	8.94907	8.60871	7.57983
THC0290_N_0339	567081	567646	-1	3prime-PT	NA	566	1	0	1	432	0	THC0290_0470	THC0290_0470	0	NA	NA	NA	-	4.89019	5.188	6.09468	6.38444	7.91628	8.34133	8.74926	8.17543	9.23972	9.33386	6.05797	5.5806	9.87689	9.14894	8.23558	7.06203	8.94442	10.2745	10.4374	10.1133	5.68058	5.06134	5.08775	4.86726	4.32906	5.25736	6.49915	6.45576	5.30305	4.51386	5.10377
THC0290_N_0360	604737	605191	-1	3prime-PT	NA	455	1	0	1	274	0	THC0290_0499	THC0290_0499	1	604974,605171,-	0.98	198	MIFLTAFTILLTASMILLTELMIFHNAFTILLTAFMNFEPVITILKPASMNLEHASTISEPANMI	8.53755	8.72322	9.31081	9.21804	9.78447	9.72502	10.2032	8.06438	9.59491	9.83797	9.35098	9.44959	8.85029	8.60916	9.7825	9.65614	8.4351	9.03396	8.18694	9.14384	8.81118	7.89569	7.49952	7.50751	7.58484	7.44366	8.80372	8.79721	9.25015	8.73052	9.01098
THC0290_N_0361	605192	605226	-1	3prime	NA(CDS:THC0290_0500)	35	1	0	1	29	0	THC0290_0499	THC0290_0499	0	NA	NA	NA	-	NA	NA	NA	NA	NA	NA	NA	NA	NA	NA	NA	NA	NA	NA	NA	NA	NA	NA	NA	NA	NA	NA	NA	NA	NA	NA	NA	NA	NA	NA	NA
THC0290_N_0398	673140	674020	-1	5prime	NA(CDS:THC0290_0551)	881	1	0	1	360	0	THC0290_0552	THC0290_0552	1	673538,673807,-	1	270	MEELEQKLKLTFEKHKKGYASICEPISGLISRQNNALKFGAVNEKYVDEILEILNTHIENKSDSEKENSIEISKDYINLFQKLVINPFS	8.98316	8.8829	9.24706	9.14553	10.0031	10.0505	10.4319	10.135	11.6597	11.5976	9.41134	9.48553	12.6888	12.5515	12.0518	11.8108	11.5809	11.9837	12.4732	12.2008	8.72475	8.72442	9.00282	8.92674	8.86652	8.77712	9.11935	9.14505	9.63045	9.5192	9.03007
THC0290_N_0407	687604	688071	1	repeated_region	NA	468	2	1	1	303	0	THC0290_0565	THC0290_0565;THC0290_N_0406	0	NA	NA	NA	-	4.05467	4.01148	4.80358	4.23775	5.7028	6.38247	6.70415	8.38444	8.51843	8.51966	4.82244	4.45855	9.82687	8.84469	7.73845	6.74778	8.52398	8.84484	9.97712	7.78195	4.13775	4.83882	3.9546	3.92232	3.88969	4.02286	4.92633	4.74372	4.37898	4.5	4.18884
THC0290_N_0423	708013	708480	-1	3prime	NA(CDS:THC0290_0582)	468	1	0	1	468	0	THC0290_0581	THC0290_0581	0	NA	NA	NA	-	5.97108	6.04609	7.33088	6.46605	7.02364	7.70717	7.24315	9.25142	5.94075	6.45039	6.29014	6.31033	7.86063	4.73876	7.02103	6.23724	7.24115	6.43806	6.06685	5.61668	6.86803	6.67349	6.60057	6.72967	6.14299	6.49445	7.59283	7.2396	7.41883	7.25465	6.03909
THC0290_N_0424	708493	708688	1	3prime	NA(CDS:THC0290_0581)	196	1	0	1	196	0	THC0290_0582	THC0290_0582	1	708580,708624,+	1	45	MNKNIICNSYHNCF	7.50213	7.32574	8.09657	8.21482	8.64931	8.58828	8.88453	10.5749	9.74734	9.67744	8.09111	8.30332	9.70755	10.4529	9.57445	9.37292	10.1006	9.80046	8.73205	7.9408	7.05663	7.43243	6.85667	6.38821	6.63323	6.39981	8.09616	7.92148	9.01594	9.24018	7.74399
THC0290_N_0425	708689	709190	1	3prime-PT	NA	502	1	0	1	502	0	THC0290_0582	THC0290_0582	0	NA	NA	NA	-	6.9202	6.80302	7.00636	7.21172	7.31033	7.39506	7.36572	10.0065	8.14814	8.06663	7.18869	6.84593	9.5233	9.67828	8.65438	8.34097	7.96809	9.12995	9.10998	6.77429	6.77409	6.82634	5.63023	6.37925	5.82082	5.8136	6.74593	6.66061	8.04642	7.77083	6.55392
THC0290_N_0437	734570	734926	-1	repeated_region	NA	357	2	1	1	103	0	THC0290_N_0438	THC0290_0598;THC0290_N_0438	1	734650,734781,-	0.999	132	MTTSSINIPVFLKLNWYKTDYTILSVKIKDTNINLFSNNPSTS	7.62061	7.97544	8.27909	8.06643	7.87884	8.45719	7.65899	7.8482	7.24059	7.75415	7.78633	7.48589	7.65522	3.87274	7.53192	7.30402	7.04364	6.92263	6.22435	8.08732	8.22921	8.47092	7.62597	7.62169	7.60086	8.88555	8.28028	7.9186	8.01562	7.75769	8.20004
THC0290_N_0438	734673	735247	1	repeated_region	NA	575	3	2	1	245	0	THC0290_N_0437	THC0290_0599;THC0290_N_0437;THC0290_N_0439	1	734841,734885,+	0.53	45	MTNCMFFYPSKFKL	6.71092	6.36014	6.54195	7.08573	6.63569	7.9863	7.35896	10.3711	8.20011	8.88136	6.60234	6.03552	9.11174	5.53441	7.24034	8.03216	7.20431	7.34439	8.93519	7.39401	7.35996	6.93037	6.90043	7.08217	7.81566	6.65508	6.63961	6.44925	6.45622	6.42539	6.47783
THC0290_N_0440	738918	739331	-1	3prime	NA(CDS:THC0290_0602)	414	1	0	1	414	0	THC0290_0601	THC0290_0601	0	NA	NA	NA	-	8.47809	8.34214	8.28688	8.34138	8.95929	8.69292	9.34002	10.5973	8.78882	8.31213	8.06746	8.12727	7.7132	8.25245	8.22367	8.40422	8.20491	7.23956	5.96698	7.19035	8.63112	8.55978	8.59081	8.51537	8.43298	8.54613	8.87515	9.12708	9.28489	9.16826	8.00263
THC0290_N_0441	739332	739567	1	3prime	NA(CDS:THC0290_0601)	236	1	0	1	236	0	THC0290_0602	THC0290_0602	0	NA	NA	NA	-	8.47952	8.39083	8.36956	8.47398	8.86357	8.91807	8.84801	8.96389	10.0587	9.71901	8.44932	8.26594	9.61414	9.57225	8.10179	8.12731	9.03941	8.97938	9.36025	8.48732	8.31797	8.54205	8.57505	7.99068	8.41658	8.37918	8.26427	8.19611	7.92593	8.26089	8.30174
THC0290_N_0444	745438	745510	-1	3prime	NA(CDS:THC0290_0611)	73	1	0	1	73	0	THC0290_0610	THC0290_0610	0	NA	NA	NA	-	12.4	12.8196	14.1392	14.1905	15.0946	15.5467	15.2827	15.7902	15.2988	15.2555	13.7364	13.9272	16.0446	15.4281	15.6359	15.2381	15.7709	15.5539	15.388	15.2937	12.7035	12.763	12.9805	12.6603	12.8974	12.8477	14.0403	14.2418	12.8804	12.8785	13.5644
THC0290_N_0447	751085	752281	1	3prime	NA(CDS:THC0290_0615)	1197	2	1	1	780	0	THC0290_0616	THC0290_0616;THC0290_N_0448	0	NA	NA	NA	-	8.24743	7.94725	7.85112	8.07484	8.28833	8.96716	8.97733	9.485	9.63467	9.30738	8.11291	7.70243	8.84979	8.93169	8.50277	8.84929	8.31187	8.55169	9.864	8.21001	8.02205	7.96866	8.07399	8.38609	8.63161	8.42487	7.56514	7.74854	8.16315	8.49349	7.5325
THC0290_N_0453	760731	761017	1	3prime	pdxJ(CDS:THC0290_0624)	287	1	0	1	265	0	THC0290_0625	THC0290_0625	0	NA	NA	NA	-	8.86461	8.90148	8.63583	8.88223	9.45958	9.24907	9.88	11.8375	10.4358	10.2668	8.74228	8.79003	10.6738	10.7907	10.6799	10.748	10.1844	10.5755	10.5322	10.277	8.85775	8.96233	8.88218	8.84392	9.13804	8.9212	9.36908	9.44894	9.43502	9.6136	8.78117
THC0290_N_0454	761018	761188	1	3prime-PT	NA	171	1	0	1	171	0	THC0290_0625	THC0290_0625	0	NA	NA	NA	-	6.89428	6.87218	6.55484	6.89436	7.15124	7.39593	7.84746	9.57577	7.26324	7.20396	6.87569	6.35392	7.33233	3.94282	7.29073	6.9043	4.25361	7.76207	6.81562	3.88015	6.78575	7.13022	6.24062	6.87998	6.50468	6.99573	7.37432	6.97963	7.20858	7.31726	6.61465
THC0290_N_0460	767146	767422	-1	indep	NA	277	2	1	1	129	0	THC0290_N_0461	THC0290_0631;THC0290_N_0461	0	NA	NA	NA	-	5.49971	4.89566	5.65921	6.2278	6.48399	7.3786	6.76557	10.082	8.55327	9.11659	5.43397	4.68601	8.65594	7.729	7.59634	6.34191	8.61922	9.11026	11.4052	9.64241	5.31054	5.35658	5.03061	5.00614	5.27654	4.7332	5.27441	5.40454	4.48499	4.48873	5.08289
THC0290_N_0462	768085	768500	-1	3prime	NA(CDS:THC0290_0634)	416	2	1	1	359	0	THC0290_0633	THC0290_0633;THC0290_N_0463	0	NA	NA	NA	-	6.56309	6.5434	6.71502	6.90059	7.50234	7.68295	7.89026	9.60691	8.33657	8.3214	6.50968	6.76884	8.22147	9.17967	7.82866	7.76908	7.99875	7.7264	7.78833	8.7998	6.71872	6.67997	6.24082	6.40728	5.94269	6.0532	7.51703	7.66483	6.67473	6.51491	6.67076
THC0290_N_0463	768444	768788	1	3prime	NA(CDS:THC0290_0633)	345	2	1	1	288	0	THC0290_0634	THC0290_0634;THC0290_N_0462	0	NA	NA	NA	-	9.40713	9.03856	8.2955	8.26606	8.23208	7.9868	8.12304	9.503	7.72817	8.32215	8.27044	8.2019	9.89499	9.99563	9.05364	8.29385	9.66603	10.0018	9.01674	7.35311	9.70147	9.77147	9.41556	10.0813	9.83093	10.1247	8.82674	8.86096	9.37357	9.68233	8.05443
THC0290_N_0464	768887	769220	1	indep	NA	334	1	0	1	256	0	THC0290_0634	THC0290_0634	0	NA	NA	NA	-	7.91962	7.51551	6.57761	6.62718	6.29682	6.73749	6.5226	8.09486	5.9816	7.354	6.9634	6.59501	7.86413	8.36284	8.16885	7.4739	8.19978	7.5695	5.55265	6.92702	8.23639	8.2724	8.12139	9.39434	8.71389	9.38886	6.47623	6.46592	7.8262	7.88812	6.77885
THC0290_N_0465	770297	771152	1	intra	rlmN(CDS:THC0290_0635)	856	1	0	1	832	0	THC0290_0636	THC0290_0636	0	NA	NA	NA	-	6.24121	6.33733	5.62712	6.04613	6.89924	7.46723	7.51369	9.31548	9.62584	9.91489	5.85764	5.1754	9.21241	8.01804	7.45571	6.80958	8.05246	9.77394	11.2077	9.14427	6.29527	5.96863	7.52557	6.95354	7.43493	7.24343	6.66421	6.51904	6.32417	6.1714	6.15146
THC0290_N_0467	779421	779788	-1	3prime	NA(CDS:THC0290_0644)	368	1	0	1	328	0	THC0290_0643	THC0290_0643	0	NA	NA	NA	-	6.09685	6.21884	6.63646	7.12873	8.95573	9.29009	9.94024	11.4392	10.4365	10.3841	6.34503	6.35402	11.7015	11.0509	11.2016	11.1763	10.957	11.2	11.234	11.1744	6.17037	6.22709	5.59165	6.34007	6.17005	6.43714	7.4762	7.59486	7.16215	7.04857	6.08919
THC0290_N_0468	779749	779897	1	3prime	dnaG(CDS:THC0290_0643)	149	1	0	1	109	0	THC0290_0644	THC0290_0644	0	NA	NA	NA	-	7.78009	8.01885	6.819	7.19567	6.28689	7.55698	6.69666	8.14824	7.9972	8.79203	7.45451	6.85464	9.34981	6.92632	5.93496	6.89036	7.56261	8.14396	9.54008	9.39478	7.96725	8.1405	8.065	8.19901	8.03005	8.10623	6.72778	6.7906	7.84226	7.82113	7.28878
THC0290_N_0475	790755	790883	-1	indep	NA	129	1	0	1	129	0	THC0290_0655	THC0290_0655	0	NA	NA	NA	-	3.87977	3.85565	4.5513	3.86506	4.97024	7.75123	5.25199	7.92984	7.22637	9.58569	4.36779	4.16547	10.6579	8.71737	7.27457	5.71618	8.85868	11.1905	11.8717	9.57433	3.8694	4.2854	4.27133	3.85333	3.89643	3.85333	4.7301	4.96089	4.02018	3.95411	4.20502
THC0290_N_0483	801868	802199	-1	3prime	rpe(CDS:THC0290_0665)	332	1	0	1	332	0	THC0290_0664	THC0290_0664	0	NA	NA	NA	-	8.01103	7.94684	7.59473	7.44756	7.36159	7.6025	7.25953	8.07808	6.29702	6.52865	7.55439	7.26039	7.88088	7.34835	5.29189	5.69677	5.74603	5.24795	6.35439	3.93411	8.25725	7.89297	8.06751	7.9662	8.12551	8.37978	7.85505	7.85563	7.93907	7.98726	7.90199
THC0290_N_0484	802212	803155	1	3prime	NA(CDS:THC0290_0664)	944	1	0	1	648	0	THC0290_0665	THC0290_0665	0	NA	NA	NA	-	7.14332	6.83623	6.61816	7.0301	7.32077	7.22021	7.75868	7.69458	7.87173	7.58001	6.92603	6.66341	7.13764	7.44837	7.21933	7.11336	7.29058	6.59757	7.17446	6.73152	7.05103	7.26369	6.79171	7.35903	6.82281	7.14051	7.03388	6.96948	7.22525	7.13299	6.07608
THC0290_N_0500	826538	826787	-1	3prime	NA(CDS:THC0290_0692)	250	1	0	1	214	0	THC0290_0691	THC0290_0691	0	NA	NA	NA	-	8.11652	7.9569	7.59329	7.60395	7.30878	7.67544	7.70362	7.68834	7.85526	7.29659	7.45323	6.90137	7.67787	6.93862	5.7647	7.15222	8.04146	8.49556	9.26256	7.35322	7.84249	8.22925	7.30885	7.51404	7.96759	8.01783	7.5406	7.70576	7.60508	7.63409	7.53145
THC0290_N_0502	829692	829841	-1	3prime	xerD(CDS:THC0290_0694)	150	2	1	1	54	0	THC0290_N_0503	THC0290_0693;THC0290_N_0503	0	NA	NA	NA	-	5.00847	4.08007	4.2535	4.52286	4.00183	5.64095	4.00048	7.72633	3.88613	6.4573	4.17619	4.14004	3.92866	3.92356	3.85333	3.85333	5.79127	4.29923	10.1785	3.85333	5.70491	4.84251	3.98424	4.86148	3.89644	4.38089	4.91738	4.45889	4.87277	3.89397	4.58888
THC0290_N_0503	829746	830044	1	3prime	hisS(CDS:THC0290_0693)	299	2	1	1	203	0	THC0290_0694	THC0290_0694;THC0290_N_0502	0	NA	NA	NA	-	7.93756	7.93532	7.68171	7.60407	7.97206	7.69884	8.26747	9.51339	7.37248	7.98279	7.70725	7.53317	8.12894	7.92782	7.60282	7.29975	4.17896	6.78857	3.92943	4.00384	7.79228	7.82937	8.14125	8.02682	7.99386	7.99029	7.99964	8.00226	7.52887	7.83497	7.85458
THC0290_N_0516	844739	845012	-1	3prime	NA(CDS:THC0290_0708)	274	1	0	1	274	0	THC0290_0707	THC0290_0707	0	NA	NA	NA	-	7.18599	6.87799	6.20201	6.56471	6.56928	6.93879	6.84117	8.95898	7.39809	8.30252	6.54427	6.53813	8.7334	7.81127	7.29135	6.42175	7.48238	9.58068	9.65731	8.20954	7.49006	7.39358	7.1491	7.81882	7.20865	7.76708	6.81685	6.75036	6.91913	6.42146	6.01661
THC0290_N_0517	845017	845453	1	3prime	NA(CDS:THC0290_0707)	437	1	0	1	437	0	THC0290_0708	THC0290_0708	0	NA	NA	NA	-	6.10142	6.08382	6.20999	6.8766	7.76568	7.79861	8.53983	9.86892	8.8519	8.69885	6.65597	6.45107	10.3186	10.6426	9.11425	8.92061	10.1423	10.0905	8.25579	8.09498	5.84516	6.63532	5.03827	5.23492	4.65414	5.1789	6.81003	6.92428	6.83512	7.31607	5.99388
THC0290_N_0524	855197	855910	-1	3prime	NA(CDS:THC0290_0719)	714	1	0	1	695	0	THC0290_0718	THC0290_0718	0	NA	NA	NA	-	7.39692	7.21294	6.56266	7.02885	6.99592	7.11135	6.88143	8.80722	7.43293	7.16901	6.81085	6.59771	6.59083	7.35267	7.54849	7.0735	7.64356	7.90396	8.44578	7.09736	7.41556	7.42097	7.44622	7.5787	7.63807	7.60805	6.77512	7.13682	7.04042	7.12386	6.73262
THC0290_N_0525	859327	859592	1	3prime	NA(CDS:THC0290_0723)	266	1	0	1	256	0	THC0290_0724	THC0290_0724	0	NA	NA	NA	-	7.77601	7.59401	7.24654	7.37853	7.42956	7.39372	6.92136	8.5918	5.75938	6.43028	7.52906	7.00776	4.04244	4.28806	5.89388	6.27544	4.47037	5.32646	6.65821	4.88484	7.56389	7.75926	7.10106	7.36245	7.08307	7.21709	7.13459	7.31014	7.54146	7.71497	7.05452
THC0290_N_0542	883959	884947	-1	3prime	NA(CDS:THC0290_0745)	989	1	0	1	842	0	THC0290_0744	THC0290_0744	0	NA	NA	NA	-	7.70105	7.47383	6.97922	7.48958	7.57913	7.37925	8.2939	8.04812	8.63646	7.6205	7.31419	7.21218	7.44361	8.59161	8.1686	7.15154	6.20315	7.60926	9.32998	8.17292	7.70126	7.57933	7.76789	7.93388	7.58796	7.7215	7.45998	7.59956	7.45598	7.25435	6.70921
THC0290_N_0544	887134	887639	-1	3prime	NA(CDS:THC0290_0747)	506	2	1	1	224	0	THC0290_N_0545	THC0290_0746;THC0290_N_0545	0	NA	NA	NA	-	6.7676	6.54236	5.87647	6.1859	5.7468	6.38526	6.01206	9.23592	5.63884	6.23077	6.10939	5.95086	3.96868	3.86802	3.85333	4.41958	3.87912	3.90313	3.9364	3.89275	6.58384	7.05906	6.23986	6.88204	6.50125	6.59434	5.78404	6.06063	6.00659	7.02974	6.07808
THC0290_N_0545	887358	887776	1	3prime	NA(CDS:THC0290_0746)	419	2	1	1	137	0	THC0290_N_0544	THC0290_0747;THC0290_N_0544	0	NA	NA	NA	-	7.33992	7.55295	6.3449	6.16971	5.73907	6.16408	6.29194	6.57917	3.90652	6.10248	6.70219	6.13576	4.23875	4.01934	5.36396	5.50492	3.87766	3.93665	4.36094	5.8076	7.88484	7.8097	7.84787	8.20842	8.00787	8.25121	7.33674	7.13975	7.82557	7.34425	6.96043
THC0290_N_0547	890208	890480	-1	3prime	NA(CDS:THC0290_0749)	273	1	0	1	273	0	THC0290_0748	THC0290_0748	0	NA	NA	NA	-	7.93749	7.85861	7.57878	7.86375	8.02499	8.06932	8.26425	9.19338	7.36839	7.52738	7.47624	7.58437	6.62912	3.87219	6.05745	5.94638	7.70807	4.32887	5.30713	4.26174	8.09688	7.76038	7.33037	7.89712	7.09052	7.35839	7.75023	7.5995	7.05794	6.45075	7.12737
THC0290_N_0548	890506	891130	1	3prime	NA(CDS:THC0290_0748)	625	1	0	1	625	0	THC0290_0749	THC0290_0749	0	NA	NA	NA	-	7.30212	6.83559	6.49627	6.55641	7.00226	7.14962	7.67902	8.87649	7.82086	7.53824	6.92247	6.34901	8.3379	9.26274	8.27016	7.58852	7.82927	7.09375	7.80585	3.92591	7.45883	7.29252	6.97353	7.24348	6.87345	7.0215	7.29934	7.05001	8.06416	8.05875	6.08604
THC0290_N_0555	899901	900114	1	3prime	NA(CDS:THC0290_0754)	214	1	0	1	52	0	THC0290_0755	THC0290_0755	0	NA	NA	NA	-	9.86394	10.0468	11.7028	11.3441	11.8765	12.2583	11.9099	12.0302	12.396	12.7044	11.2963	11.4865	12.9532	12.5376	12.692	12.8957	12.3216	12.8786	12.5592	11.1196	10.0127	10.3762	10.4355	10.5611	10.8195	10.6677	11.1012	11.1756	9.99912	10.4004	10.6751
THC0290_N_0558	906298	906570	-1	3prime	NA(CDS:THC0290_0760)	273	1	0	1	270	0	THC0290_0759	THC0290_0759	0	NA	NA	NA	-	6.67092	6.71968	6.0138	6.11672	5.44544	7.55821	6.39483	8.92303	6.93941	7.95473	6.4845	5.95906	8.15688	4.12585	3.85333	5.40214	3.88554	3.95936	4.35208	3.85333	6.71331	6.72441	6.26672	6.56945	6.19138	6.43808	5.85119	5.88255	6.20546	6.33531	6.08476
THC0290_N_0559	906568	906717	1	3prime	phhA(CDS:THC0290_0759)	150	1	0	1	147	0	THC0290_0760	THC0290_0760	0	NA	NA	NA	-	10.1249	10.0587	10.823	10.8869	11.3174	11.967	11.6902	13.7506	11.866	11.789	10.8406	10.7475	11.5751	11.3584	11.2981	11.4108	10.9716	11.1539	11.3055	10.3903	10.0974	10.3189	10.164	10.3763	10.3176	10.4514	11.0424	11.0918	10.63	10.7083	10.1919
THC0290_N_0560	907245	908039	1	indep	NA	795	1	0	1	795	0	THC0290_0761	THC0290_0761	0	NA	NA	NA	-	5.55921	5.7784	5.12968	5.52965	5.2358	5.25093	4.98663	7.09649	4.29053	5.92089	5.80352	5.48343	5.88029	5.34728	5.49912	5.65913	6.46215	4.84327	6.66881	7.2228	5.56955	6.07913	5.62398	6.1594	5.86509	5.72048	5.40476	5.13289	5.29466	5.47377	5.1881
THC0290_N_0575	929531	929992	-1	3prime	NA(CDS:THC0290_0781)	462	1	0	1	457	0	THC0290_0780	THC0290_0780	0	NA	NA	NA	-	6.60494	6.96701	6.5236	6.74389	6.48371	7.32881	6.79922	8.40721	7.23361	7.79798	6.33479	5.72691	8.12705	3.88058	6.18755	7.16386	4.7168	6.27878	7.49583	4.76621	6.90041	7.0208	6.54586	6.61298	6.64196	6.88369	6.04683	6.25211	7.10711	7.63403	6.30697
THC0290_N_0582	943455	943570	-1	3prime	NA(CDS:THC0290_0793)	116	1	0	1	63	0	THC0290_0792	THC0290_0792	0	NA	NA	NA	-	9.4866	9.64827	10.0325	9.9031	10.5777	10.6447	11.0587	12.4807	11.5702	11.6556	10.2789	10.1799	11.9713	12.0659	11.6063	11.3753	11.0433	11.2503	11.4059	11.1933	9.95953	10.0876	9.4676	9.85595	9.72624	9.95377	10.0938	10.0916	10.2263	10.1479	10.3942
THC0290_N_0588	955247	955570	1	indep	NA	324	1	0	1	324	0	THC0290_0800	THC0290_0800	0	NA	NA	NA	-	5.30861	5.25195	5.28953	5.53534	6.16782	6.76691	6.63719	9.1012	6.97123	7.19797	5.63387	5.31696	7.65116	5.36025	5.76089	5.73441	7.30521	7.9657	8.64952	4.83973	5.33769	5.43957	4.51043	5.74148	6.03412	5.8319	4.297	5.58156	5.3206	6.23849	5.19389
THC0290_N_0593	965318	965499	-1	3prime	NA(CDS:THC0290_0810)	182	1	0	1	182	0	THC0290_0809	THC0290_0809	0	NA	NA	NA	-	8.19604	8.03796	7.58822	7.96291	7.92101	7.81388	8.77954	7.63138	10.0685	9.44509	7.75214	7.62059	8.96833	11.4822	10.3274	9.29127	12.2744	10.25	11.1691	13.089	8.31295	7.51977	8.22805	7.89813	7.90396	7.27288	7.84564	7.88253	7.75028	7.59295	7.46437
THC0290_N_0594	965520	966173	1	3prime	NA(CDS:THC0290_0809)	654	1	0	1	654	0	THC0290_0810	THC0290_0810	1	965586,965657,+	1	72	LKNVLNLGVVGFYFSILLLLLIG	7.38357	7.24534	6.67702	6.86066	7.18074	6.72449	7.68332	7.34666	7.61235	7.66373	6.69624	6.6069	6.21063	4.39953	6.62876	6.7948	6.87649	7.67367	7.62402	6.10153	7.58476	7.72119	7.30869	7.86579	7.29877	7.34331	7.38215	7.23642	8.96888	8.71472	6.4433
THC0290_N_0601	976566	976680	1	indep	NA	115	1	0	1	115	0	THC0290_0819	THC0290_0819	0	NA	NA	NA	-	5.08215	4.82743	5.10111	5.50795	5.77814	6.57359	6.12593	9.00548	6.33435	7.48966	5.17778	4.78928	9.07203	8.25145	7.59686	7.53035	3.85333	7.83534	6.66342	8.21162	4.60708	5.43924	4.5021	4.85168	5.19958	4.72423	4.90287	5.22772	5.99481	6.35901	5.0989
THC0290_N_0615	996138	998041	1	3prime-PT	NA	1904	2	0	2	1697	0	THC0290_0837	THC0290_0837;THC0290_0838	1	996268,996348,+	0.899	81	MYSIMYYLRNRKGDIGMLKRGKDKTL	6.73703	6.61105	6.99601	6.70691	6.78211	6.75249	6.56458	7.73821	7.87381	7.50295	6.44341	6.29371	7.11179	9.10242	8.07355	7.47161	9.24773	7.3319	8.7183	10.277	6.92482	6.64002	6.9228	7.46062	6.9495	8.0924	7.03009	6.47634	6.22124	6.2984	7.0218
THC0290_N_0617	1004055	1004461	1	3prime	relA(CDS:THC0290_0842)	407	1	0	1	225	0	THC0290_0843	THC0290_0843	0	NA	NA	NA	-	6.76275	6.74057	6.51341	6.79971	7.44307	8.09472	8.01307	10.1323	6.63445	7.31925	7.11908	6.7168	8.55108	8.11114	6.58137	7.52275	6.29703	7.35495	5.73377	3.93154	6.87355	7.44434	5.59732	6.57239	6.96234	6.7035	7.90709	7.80965	7.47376	7.97086	6.09556
THC0290_N_0618	1006936	1007642	1	3prime	NA(CDS:THC0290_0845)	707	1	0	1	707	0	THC0290_0846	THC0290_0846	0	NA	NA	NA	-	6.97021	6.62446	7.22775	7.35421	7.52353	7.395	7.14289	9.19521	7.15687	7.53476	7.4154	7.40394	8.20196	8.06443	7.19672	7.13132	6.3875	6.8613	8.37281	6.02796	6.96539	7.19303	6.75679	6.61334	6.5753	6.40372	7.38934	7.57442	7.55946	8.447	7.03301
THC0290_N_0619	1009763	1009899	1	indep	NA	137	1	0	1	137	0	THC0290_0850	THC0290_0850	0	NA	NA	NA	-	4.10202	3.89315	3.86856	3.85567	3.85333	5.17181	3.86645	7.36834	5.03491	6.54294	4.01618	3.95219	6.39163	3.9621	3.94256	4.19202	3.99987	3.8841	7.97645	3.90557	3.98945	4.61278	3.87968	3.91174	4.04462	3.98425	3.91773	3.87962	4.2446	5.02377	4.02548
THC0290_N_0621	1016422	1016591	-1	3prime	NA(CDS:THC0290_0856)	170	2	1	1	104	0	THC0290_0855	THC0290_0855;THC0290_N_0622	0	NA	NA	NA	-	10.4334	10.5951	11.5167	11.791	12.6161	13.0884	12.6276	13.6556	12.7512	12.7948	11.3995	11.7765	13.5006	13.5651	12.8005	12.9727	13.0679	13.2536	12.8915	12.3788	10.1882	10.4354	10.0794	9.72517	9.8279	9.70725	11.9331	12.0856	11.9103	12.1059	10.8743
THC0290_N_0622	1016526	1016771	1	3prime	priA(CDS:THC0290_0855)	246	2	1	1	180	0	THC0290_0856	THC0290_0856;THC0290_N_0621	0	NA	NA	NA	-	6.65047	6.01478	6.01166	6.37154	5.88169	6.64682	5.94829	9.77733	5.97216	6.83915	6.34031	5.63778	7.70299	6.25669	4.93065	5.69193	5.52956	7.18282	8.20191	4.18882	6.74899	6.83809	5.00155	5.74021	6.5861	6.25813	5.84739	6.05013	5.30915	5.55008	5.89978
THC0290_N_0635	1040983	1041081	1	3prime	ytxJ(CDS:THC0290_0883)	99	1	0	1	54	0	THC0290_0884	THC0290_0884	0	NA	NA	NA	-	7.58044	7.64014	7.59621	7.78973	8.05647	8.21178	8.91918	11.2586	9.65943	9.4379	7.48797	7.29097	10.8335	11.2502	10.2337	9.99312	9.56466	10.0636	10.017	5.38639	7.61749	8.04939	8.09611	8.27837	8.05545	8.60306	7.76269	8.03547	8.64109	8.82243	7.79792
THC0290_N_0637	1045092	1045782	-1	3prime	NA(CDS:THC0290_0888)	691	1	0	1	71	0	THC0290_0887	THC0290_0887	1	1045343,1045405,-	0.766	63	VLIGTMLSFGIAIMIGLLID	9.02254	9.06797	9.10734	9.3192	9.23947	9.01487	9.0587	10.2431	10.0181	9.90834	8.99843	9.19498	10.3936	10.863	10.0108	9.97203	10.3011	10.2007	10.1355	10.2311	8.85015	8.90274	9.36915	8.92497	9.50276	8.86075	8.69891	8.84524	8.90837	9.22634	8.90997
THC0290_N_0668	1105898	1106177	-1	3prime	rlmF(CDS:THC0290_0939)	280	1	0	1	265	0	THC0290_0938	THC0290_0938	0	NA	NA	NA	-	7.35029	7.16008	6.58802	7.45412	7.06166	6.75999	7.0106	7.60642	5.73369	6.54352	7.19896	6.7522	5.96858	3.96799	3.93613	5.68221	5.06969	5.31334	4.3454	3.94743	7.03551	7.11093	7.65191	7.93236	7.76094	7.88562	7.00574	7.22919	6.03613	5.84688	6.74798
THC0290_N_0669	1106163	1106281	1	3prime	aroE(CDS:THC0290_0938)	119	1	0	1	104	0	THC0290_0939	THC0290_0939	0	NA	NA	NA	-	9.06871	9.04879	8.35048	8.42939	8.45639	8.72535	8.86464	9.97124	7.73574	7.88058	8.40477	8.24087	7.65828	6.75238	7.29068	7.68628	3.87777	6.87525	7.12602	4.73401	9.29612	9.03344	8.23015	8.36017	7.90007	8.09259	8.80372	9.07955	10.1189	10.1111	8.52536
THC0290_N_0670	1112722	1113219	-1	3prime-PT	NA	498	3	2	1	166	0	THC0290_N_0671	THC0290_0942;THC0290_N_0671;THC0290_N_0672	1	1112884,1112928,-	1	45	MTNCIFFYPSKFKL	5.60572	5.09161	5.70824	5.66585	5.25299	6.81846	6.43924	8.56337	7.19616	8.98678	5.72179	5.27358	9.44381	8.71218	7.36623	6.5028	8.0699	8.11507	9.53605	9.88307	5.58725	5.43626	5.23527	5.61614	6.19308	5.89038	6.28566	6.0452	5.90541	5.91616	5.43572
THC0290_N_0675	1119827	1119911	-1	indep	NA	85	1	0	1	85	0	THC0290_0946	THC0290_0946	0	NA	NA	NA	-	6.54983	6.62783	7.14549	7.15559	7.61901	7.99701	8.39711	10.4994	10.7551	10.136	6.97023	6.64132	11.0163	11.0675	10.0548	9.92607	10.2632	10.5318	11.7387	11.1664	6.92944	6.7513	6.92678	6.72746	6.95405	6.93266	7.26365	7.36422	8.68711	8.64236	6.56523
THC0290_N_0676	1120015	1120649	1	3prime	pafA(CDS:THC0290_0946)	635	1	0	1	343	0	THC0290_0947	THC0290_0947	1	1120123,1120188,+	0.542	66	MANPYRVFLIPVNLMIKRYYI	7.75872	7.64097	7.68031	8.03036	7.93704	8.13662	7.95908	10.3068	7.71022	7.8673	7.88523	7.58196	8.61044	7.89305	7.81781	7.63153	7.3056	7.81093	6.76017	6.44133	7.857	8.10906	7.51925	7.37084	7.6239	7.57526	8.27018	8.23956	7.74705	8.17258	7.65819
THC0290_N_0687	1134182	1134362	-1	3prime	NA(CDS:THC0290_0964)	181	1	0	1	174	0	THC0290_0963	THC0290_0963	0	NA	NA	NA	-	6.80113	7.21457	7.62449	7.64019	8.65526	9.08705	9.17497	10.2563	8.50416	8.60119	7.76188	7.66298	7.49239	3.87414	5.60004	6.78128	3.86628	3.87615	3.90088	3.85333	7.13875	7.67262	7.12507	7.29539	7.05214	7.60919	7.78548	7.72919	7.58575	7.71496	7.12848
THC0290_N_0688	1134356	1134819	1	3prime	NA(CDS:THC0290_0963)	464	1	0	1	457	0	THC0290_0964	THC0290_0964	0	NA	NA	NA	-	6.60563	6.68339	6.08176	6.50127	7.1308	7.17064	8.05546	10.2145	7.99746	7.57017	6.12143	5.94694	7.02667	7.9822	7.74998	7.73322	4.1089	5.34241	4.8688	6.64754	6.57292	6.90288	5.59661	6.3878	5.92671	6.14778	6.81328	6.93945	6.67252	6.91429	6.28591
THC0290_N_0689	1135956	1136305	-1	3prime-PT	NA	350	1	0	1	320	0	THC0290_0966	THC0290_0966	0	NA	NA	NA	-	9.09945	8.87281	8.78878	9.08543	9.37149	9.29598	8.9732	9.69346	6.52226	6.64897	9.10473	8.70182	5.41205	4.07144	6.58141	5.68378	4.00658	6.67796	7.47151	3.98175	9.35653	9.07657	8.68882	8.74066	8.33227	8.95358	9.11754	9.02215	9.39298	9.26307	8.17689
THC0290_N_0692	1138630	1139078	1	3prime-PT	NA	449	1	0	1	262	0	THC0290_0970	THC0290_0970	0	NA	NA	NA	-	5.88927	6.02772	5.91819	5.56959	6.27047	6.75276	7.56247	10.2208	8.90218	7.86549	5.64744	5.64914	11.2293	11.8674	9.13561	7.83968	9.75573	9.68213	9.51917	8.52472	6.1041	6.3824	6.53415	6.59618	6.49393	6.99588	6.09366	5.82619	6.68735	7.10956	5.96725
THC0290_N_0701	1153613	1154322	1	3prime-PT	NA	710	1	0	1	685	0	THC0290_0982	THC0290_0982	0	NA	NA	NA	-	5.18845	5.51127	5.10046	5.6791	6.20963	7.53651	8.07034	9.73747	6.824	7.84941	5.30597	5.05772	8.5898	6.10949	7.35501	6.91234	5.2471	6.98361	8.12312	3.88502	5.40248	5.36981	4.65014	5.4885	5.18364	5.25065	5.52431	5.83555	5.20221	5.47843	5.58537
THC0290_N_0735	1214425	1214796	-1	3prime	NA(CDS:THC0290_1038)	372	1	0	1	366	0	THC0290_1037	THC0290_1037	0	NA	NA	NA	-	8.89654	8.7371	8.39878	8.5775	9.03902	9.28378	9.53904	9.60598	8.38635	8.54863	8.53051	8.4092	9.79763	9.07285	9.18828	8.57084	10.0479	8.80649	9.13429	10.1087	9.56695	9.22526	8.21466	8.96803	8.20465	9.11453	9.38174	9.52535	9.47205	8.84282	8.47076
THC0290_N_0736	1214791	1215171	1	3prime	fjo11(CDS:THC0290_1037)	381	1	0	1	375	0	THC0290_1038	THC0290_1038	0	NA	NA	NA	-	5.10455	5.10306	4.80076	4.97371	4.40375	6.14686	4.84137	8.17259	4.3371	6.54981	4.8472	4.41884	4.72259	4.82508	4.17747	4.04848	5.05349	5.16544	7.1664	4.81397	4.34595	5.19672	5.11112	5.25853	5.59867	5.14463	4.27251	4.2905	4.26503	4.52429	4.80882
THC0290_N_0741	1222587	1222769	1	3prime-PT	NA	183	1	0	1	172	0	THC0290_1047	THC0290_1047	0	NA	NA	NA	-	7.38862	7.56746	7.49568	7.52234	7.56874	7.69934	7.85143	9.03472	8.1774	8.06826	7.33035	7.24156	7.06384	7.4127	7.31825	7.53892	8.61964	6.94834	4.21112	6.50445	7.61106	7.54824	7.34158	7.49322	7.32441	7.39019	7.91768	7.69874	8.14451	7.99504	7.44666
THC0290_N_0742	1225076	1225422	1	indep	NA	347	1	0	1	347	0	THC0290_1048	THC0290_1048	0	NA	NA	NA	-	5.90538	6.01684	6.56746	6.46202	6.98298	7.38979	7.51685	7.87073	8.23496	8.62044	6.34377	6.18052	8.54405	8.08076	6.94063	7.18122	9.09317	8.60853	9.11152	7.80809	6.04027	6.12753	5.07938	5.48397	5.37718	5.21392	6.72682	6.69239	6.12594	6.20174	6.54643
THC0290_N_0751	1248849	1249302	-1	3prime	NA(CDS:THC0290_1071)	454	2	1	1	397	0	THC0290_1070	THC0290_1070;THC0290_N_0752	0	NA	NA	NA	-	6.28577	6.08393	6.33415	6.35824	7.24626	7.37831	7.4733	10.5659	6.89996	7.13999	6.46104	6.26075	7.84749	6.33053	6.69178	7.06915	6.26785	7.92292	9.86486	6.92454	6.14965	6.9062	5.01768	5.74949	5.81837	6.03387	7.30149	7.36973	6.33582	7.03849	5.88095
THC0290_N_0752	1249246	1250138	1	3prime	NA(CDS:THC0290_1070)	893	2	1	1	836	0	THC0290_1071	THC0290_1071;THC0290_N_0751	0	NA	NA	NA	-	7.34397	7.16129	6.25838	6.08729	6.07331	6.39871	6.63891	9.42404	4.12005	6.1972	6.4966	6.02032	6.84856	6.16989	6.42084	6.42666	4.15436	4.81066	6.1526	6.29425	7.54596	7.57522	6.75792	7.29393	6.96129	7.29656	6.90946	6.96216	7.18334	7.34112	6.64307
THC0290_N_0753	1255904	1256191	1	3prime	NA(CDS:THC0290_1077)	288	1	0	1	288	0	THC0290_1078	THC0290_1078	0	NA	NA	NA	-	8.01572	8.07544	7.56073	7.63949	7.26119	7.31893	6.69535	8.23095	6.07457	6.19485	7.77698	7.49602	5.97039	7.36646	5.66537	5.68603	5.67645	7.12577	7.62982	8.59418	7.90908	7.918	7.66336	7.70157	7.6716	7.97913	7.90719	7.8591	8.34957	8.36249	7.65132
THC0290_N_0759	1267045	1267535	-1	3prime	NA(CDS:THC0290_1087)	491	1	0	1	491	0	THC0290_1086	THC0290_1086	0	NA	NA	NA	-	7.50556	7.59618	7.45194	7.3812	7.09865	7.1148	6.63226	7.32299	5.17679	6.32048	7.37841	7.01409	5.19045	4.13679	4.23611	4.45651	6.42788	6.56912	5.003	5.79625	7.93675	7.86744	7.33576	7.3759	7.30921	7.26552	7.40438	7.37214	7.45099	7.34533	7.14867
THC0290_N_0760	1267536	1267906	1	3prime	ddpX(CDS:THC0290_1086)	371	1	0	1	371	0	THC0290_1087	THC0290_1087	0	NA	NA	NA	-	5.85363	5.69668	5.78011	5.79744	5.75974	6.28982	5.90323	7.73082	3.97699	5.46612	5.86822	5.80355	5.52761	6.98742	4.09923	4.34933	5.7549	4.34487	4.8887	5.19734	5.79891	6.23984	5.57961	5.74563	5.29095	5.62023	5.85274	6.19479	7.19799	7.29306	5.91743
THC0290_N_0768	1284560	1285017	-1	3prime	yojE(CDS:THC0290_1100)	458	2	1	1	161	0	THC0290_N_0769	THC0290_1099;THC0290_N_0769	0	NA	NA	NA	-	7.3465	7.27771	7.54575	7.7712	7.41667	7.80404	7.29311	7.97627	6.02408	6.92934	7.49041	7.3425	6.39472	4.0668	5.35502	6.7858	4.38551	6.3918	6.85213	4.38525	7.30857	7.47509	6.93737	6.99746	6.97595	6.8373	7.78037	7.84194	6.4372	6.36853	7.47115
THC0290_N_0769	1284721	1285209	1	intra	NA(CDS:THC0290_1099)	489	2	1	1	192	0	THC0290_N_0768	THC0290_1100;THC0290_N_0768	1	1284746,1284820,+	0.902	75	MLFAGDRKTALILIEFILILVNPK	7.05933	7.05918	7.84771	7.73161	7.9198	8.18598	7.93014	7.93942	8.79887	8.91019	7.85495	7.80845	8.80058	8.98852	7.8104	8.18013	7.7578	8.20535	8.93054	7.90942	6.84184	7.13335	6.87606	6.84824	6.57885	7.29423	7.494	7.55084	7.61561	7.40221	7.27208
THC0290_N_0771	1288802	1288918	-1	indep	NA	117	1	0	1	117	0	THC0290_1102	THC0290_1102	0	NA	NA	NA	-	6.61309	6.54638	6.81369	7.21214	7.97309	8.24797	9.18356	10.3075	9.23879	9.31182	6.88999	7.03157	9.35644	9.82721	9.77663	9.31823	9.08878	9.97146	10.055	8.62016	6.8775	6.23819	6.08433	6.39029	6.11271	6.11444	7.49858	7.71061	7.5825	6.90829	6.55202
THC0290_N_0780	1298014	1298733	1	3prime	NA(CDS:THC0290_1109)	720	3	1	2	471	0	THC0290_1110	THC0290_1110;THC0290_1111;THC0290_N_0779	0	NA	NA	NA	-	6.64944	6.5409	6.82231	7.00435	6.73152	6.88011	6.03909	9.22201	5.04048	6.6576	7.1611	6.94158	7.6592	4.12463	5.34874	5.82829	5.79047	6.03067	6.82834	4.33189	7.18825	7.13104	6.57597	6.59781	6.59906	6.74363	7.24051	7.23317	7.22852	7.74492	6.78766
THC0290_N_0786	1308797	1309548	-1	3prime	NA(CDS:THC0290_1122)	752	1	0	1	376	0	THC0290_1121	THC0290_1121	0	NA	NA	NA	-	7.8929	7.64127	7.59217	7.47844	7.32711	7.47455	6.95924	7.73168	4.47191	6.25433	7.82144	7.61791	5.48163	7.13274	4.6921	5.71765	8.30876	7.03406	8.66645	4.982	7.50105	7.75782	6.75313	7.01287	7.19585	7.23294	7.60133	7.61639	7.22273	7.47026	7.44235
THC0290_N_0792	1396739	1396899	1	3prime	NA(misc_feature:THC0290_miscRNA_0043)	161	2	1	1	45	0	THC0290_N_0793	THC0290_1212;THC0290_N_0793	0	NA	NA	NA	-	7.1446	7.19616	7.65337	7.68624	7.97789	9.05118	8.38375	10.2734	8.50317	8.76297	7.6895	7.56212	10.0774	9.60738	8.32582	7.98446	8.30772	9.95586	9.05218	7.4587	7.50405	7.71807	7.13504	7.24542	7.08383	7.08343	7.40874	7.68273	7.70135	7.93058	7.14334
THC0290_N_0794	1396900	1397099	1	3prime-PT	NA	200	1	0	1	200	0	THC0290_1212	THC0290_1212	0	NA	NA	NA	-	6.74535	6.61885	6.65752	6.72005	7.00074	7.57961	7.16944	8.23101	7.23213	7.59369	7.09817	6.58942	8.15472	9.21136	7.84477	6.34255	8.67971	8.43732	8.38966	6.48297	6.92934	7.17634	6.65424	7.16062	6.89421	6.88892	6.80775	6.50562	7.18663	7.34163	6.38992
THC0290_N_0800	1417678	1418394	-1	3prime	NA(CDS:THC0290_1223)	717	1	0	1	717	0	THC0290_1222	THC0290_1222	0	NA	NA	NA	-	5.90165	5.69657	5.77946	6.41215	6.25794	6.76377	6.85218	8.74573	6.65153	6.25566	6.18064	6.02372	6.52872	4.14086	6.50541	5.69787	5.5256	5.86692	7.97897	3.92737	6.07744	6.58623	5.25208	5.83619	5.37411	6.40641	6.33197	6.36207	6.2679	6.89141	6.0619
THC0290_N_0801	1418443	1418638	1	3prime	uvrB(CDS:THC0290_1222)	196	1	0	1	196	0	THC0290_1223	THC0290_1223	0	NA	NA	NA	-	5.98427	6.11676	6.07037	5.63413	5.77552	6.28455	6.1401	8.64266	3.97538	6.03058	5.92631	5.15323	3.85333	3.85333	3.85333	4.34637	3.85333	3.94927	3.89005	3.85333	6.25494	6.64213	5.90604	6.29718	6.18966	6.50722	6.20366	6.11069	5.98036	5.7994	5.63746
THC0290_N_0803	1420133	1420201	1	3prime-PT	NA	69	1	0	1	52	0	THC0290_1226	THC0290_1226	0	NA	NA	NA	-	7.11743	7.04166	6.80343	6.96638	7.4955	7.17691	7.24873	9.76244	5.97926	7.0391	6.96462	7.14818	9.18163	8.1787	7.87399	7.60417	3.8743	7.31791	3.85333	3.85333	6.99385	7.43311	6.59103	7.31088	6.69776	6.76821	6.80259	6.97964	6.99984	7.31734	6.64934
THC0290_N_0806	1436072	1436459	1	indep	NA	388	1	0	1	388	0	THC0290_1243	THC0290_1243	0	NA	NA	NA	-	6.56019	6.43109	6.49379	6.47569	6.83622	7.20645	7.1103	9.74694	8.75977	7.88317	6.093	6.23036	8.58369	9.03621	7.91177	7.57951	8.90826	8.83006	9.73611	9.76551	6.73327	6.67511	5.82528	6.25319	5.59623	5.88529	6.56646	6.60237	6.34189	6.31359	6.08018
THC0290_N_0814	1444415	1444724	-1	indep	NA	310	2	0	2	318	0	THC0290_1250	THC0290_1250;THC0290_1251	0	NA	NA	NA	-	5.42122	5.63989	5.70609	6.50232	6.72683	6.82801	6.8226	8.16769	8.44181	8.52922	6.31412	6.13019	8.70359	9.68832	8.41446	7.66764	9.95322	10.0922	10.6595	10.6669	5.58444	5.81755	5.33984	5.56558	5.21569	5.28639	6.50222	6.42163	5.99301	5.70786	5.28398
THC0290_N_0821	1467104	1468011	-1	3prime	NA(CDS:THC0290_1268)	908	1	0	1	764	0	THC0290_1267	THC0290_1267	0	NA	NA	NA	-	7.66033	7.51278	7.87819	8.27846	8.96014	9.46622	9.39604	11.2478	9.66965	9.31035	7.93382	7.79117	10.2244	10.349	9.87488	9.34116	9.90693	9.93302	9.6265	9.93629	7.34855	7.41451	7.10398	6.98227	6.68607	6.9112	8.11701	8.24346	7.92353	8.0853	7.31069
THC0290_N_0822	1469293	1469476	1	3prime	NA(CDS:THC0290_1270)	184	1	0	1	173	0	THC0290_1271	THC0290_1271	0	NA	NA	NA	-	8.09057	7.99555	8.63055	9.1787	9.72269	10.1098	9.77694	10.6803	10.4092	9.77388	8.76917	8.58428	10.0375	10.2681	9.46737	8.90375	10.0474	9.98712	9.25815	9.06032	8.02733	8.32929	7.94201	7.83863	7.83213	7.66667	9.07962	9.13983	7.64318	7.6346	8.06968
THC0290_N_0826	1479465	1479836	1	3prime	NA(CDS:THC0290_1280)	372	1	0	1	290	0	THC0290_1281	THC0290_1281	0	NA	NA	NA	-	6.09223	6.40945	5.96292	6.08976	6.20118	6.45639	6.42597	8.07075	3.97568	6.20547	6.0484	5.95799	3.96245	3.87241	3.88156	5.70944	5.51639	6.31535	6.72305	5.2466	6.92249	6.46312	6.26691	6.63204	6.57845	6.83251	6.84173	6.96944	6.00675	6.84571	5.84562
THC0290_N_0830	1485341	1485886	-1	3prime	NA(CDS:THC0290_1286)	546	1	0	1	534	0	THC0290_1285	THC0290_1285	0	NA	NA	NA	-	7.7157	7.40002	7.58051	7.67291	8.10443	8.21074	8.58512	10.5968	8.67968	8.60175	7.70709	7.33201	8.66459	7.64598	7.72351	7.57815	5.10363	8.20748	8.46843	5.6575	7.42997	7.46702	7.03105	7.28061	7.05448	7.16206	8.09153	8.19548	8.04513	8.25234	7.2362
THC0290_N_0831	1485875	1486044	1	3prime	NA(CDS:THC0290_1285)	170	1	0	1	158	0	THC0290_1286	THC0290_1286	0	NA	NA	NA	-	6.64761	6.8362	6.49249	6.78472	7.40282	7.47335	7.3742	6.88447	8.82639	8.3447	6.50466	6.71922	8.85097	9.61696	8.66568	8.05861	8.20151	8.5353	8.32518	5.73755	7.11365	7.00047	6.54069	6.84092	6.26891	6.6127	7.12468	7.47563	7.10549	6.47284	6.44963
THC0290_N_0840	1497415	1497522	1	indep	NA	108	1	0	1	108	0	THC0290_1299	THC0290_1299	0	NA	NA	NA	-	6.27875	5.66513	6.22089	6.09221	6.65203	8.32594	7.55262	10.3538	8.52904	9.70852	6.63483	6.12046	11.8834	10.1244	8.93333	8.33764	10.6812	12.2522	12.5806	10.8163	4.19058	6.48565	4.66988	4.81768	4.59722	4.11435	6.97257	7.06463	5.78708	6.19395	6.0595
THC0290_N_0841	1498913	1499444	-1	3prime	kdsB(CDS:THC0290_1301)	532	1	0	1	530	0	THC0290_1300	THC0290_1300	0	NA	NA	NA	-	8.04236	8.02194	8.04699	8.04568	8.1996	8.20997	8.37395	8.88166	8.03079	7.61869	8.01212	7.87866	8.47245	8.4039	7.63927	8.0342	8.51339	8.61259	5.97273	9.06149	8.48788	7.98989	8.04736	8.34938	8.27522	8.48707	8.70089	8.51498	8.43424	8.14989	7.91503
THC0290_N_0843	1500231	1500590	1	indep	NA	360	2	1	1	215	0	THC0290_1302	THC0290_1302;THC0290_N_0842	0	NA	NA	NA	-	6.105	6.36237	6.56105	6.62227	7.07077	7.1117	7.38301	7.02772	8.67303	8.46078	6.51335	6.3036	8.06409	7.71108	7.61382	7.38532	8.21583	7.99736	9.19375	8.8834	6.00633	6.07897	5.12047	4.9347	4.2172	4.28485	6.55155	6.3295	6.69716	6.5371	6.25964
THC0290_N_0844	1505987	1506397	-1	indep	NA	411	1	0	1	387	0	THC0290_1305	THC0290_1305	0	NA	NA	NA	-	4.68589	4.71535	5.08987	4.83851	5.43864	6.58627	5.87364	8.52985	7.0406	7.18661	5.15558	4.78626	7.61341	7.62137	5.79579	5.71928	7.66187	7.63731	6.98329	8.33338	4.58752	5.1811	4.25675	4.17693	4.3735	4.4911	5.39627	5.21186	4.34294	4.44907	4.62327
THC0290_N_0845	1507414	1507684	1	3prime	NA(CDS:THC0290_1306)	271	1	0	1	165	0	THC0290_1307	THC0290_1307	0	NA	NA	NA	-	7.27887	6.92167	6.28043	6.43458	6.14017	6.60246	7.13566	8.69435	6.18581	5.73755	6.60467	6.42165	3.85333	3.88748	3.85333	6.02124	3.85333	4.05686	5.18241	3.85333	7.28084	7.43877	6.51727	7.10864	6.9667	7.30056	7.30316	7.11217	7.19833	7.26917	6.09238
THC0290_N_0849	1546143	1546768	-1	3prime	NA(CDS:THC0290_1342)	626	1	0	1	586	0	THC0290_1341	THC0290_1341	0	NA	NA	NA	-	7.04403	6.92747	7.36655	7.66881	8.16158	7.69227	8.15618	9.84078	9.44094	8.82987	7.19999	7.20248	8.8253	9.45321	9.1216	9.13561	8.83227	8.63728	9.73237	6.43086	6.96522	6.91557	6.86689	6.98095	7.25442	6.94413	7.53713	7.59003	7.4045	7.06609	7.02189
THC0290_N_0850	1546729	1546916	1	3prime	NA(CDS:THC0290_1341)	188	1	0	1	148	0	THC0290_1342	THC0290_1342	0	NA	NA	NA	-	7.19751	7.40244	7.49332	7.45329	7.43531	7.74797	7.26159	8.66179	8.40042	7.79863	7.6157	7.38428	7.83452	6.64634	7.15269	6.30038	3.90271	3.85333	3.88812	7.23645	7.39769	7.53861	7.02119	6.97515	6.70581	7.20614	7.55869	7.71147	7.58778	7.75418	7.24929
THC0290_N_0860	1567115	1567479	-1	indep	NA	365	1	0	1	365	0	THC0290_1357	THC0290_1357	0	NA	NA	NA	-	6.30776	6.1961	6.00764	6.34827	6.55875	6.83937	6.55512	7.3936	7.85682	7.53341	6.1462	6.05227	8.29444	8.68135	7.59207	7.10561	8.16074	8.53244	8.82348	9.45859	6.08757	6.43051	5.89324	6.22008	5.79231	5.89013	6.08694	6.25646	6.21497	6.14334	6.00948
THC0290_N_0867	1580352	1580535	1	3prime-PT	NA	184	2	1	1	144	0	THC0290_1368	THC0290_1368;THC0290_N_0866	0	NA	NA	NA	-	5.85512	5.47964	5.69765	5.99274	5.87943	6.5775	6.62975	7.46534	6.53142	6.98613	5.87289	5.28336	8.6579	7.93784	7.15611	6.52756	7.96614	5.85429	6.02939	6.17764	6.42573	6.66008	6.13969	6.16323	5.85133	6.69945	6.27592	5.88822	6.99851	7.0406	5.8691
THC0290_N_0876	1589665	1589857	-1	3prime	NA(CDS:THC0290_1380)	193	2	1	1	108	0	THC0290_1379	THC0290_1379;THC0290_N_0877	0	NA	NA	NA	-	7.71177	7.66107	7.88037	8.27581	8.85158	8.90226	8.91088	9.67984	8.34742	8.65191	8.05525	8.15152	9.28447	8.60727	7.92534	7.60195	7.96934	8.85786	6.87037	3.93841	7.96974	7.98832	7.47909	7.522	7.28236	7.61803	8.41965	8.7998	8.21059	8.41812	7.53503
THC0290_N_0899	1626413	1626925	1	3prime-PT	NA	513	2	1	1	414	0	THC0290_1407	THC0290_1407;THC0290_N_0898	0	NA	NA	NA	-	5.86492	5.68433	5.70721	5.5337	6.04903	6.80132	6.4029	9.86103	5.03506	6.37749	5.80807	5.27046	6.36598	6.47246	6.14107	6.28976	4.06716	3.96051	5.43843	5.14385	5.93624	6.63489	5.56878	6.22791	5.98029	6.14279	5.79391	6.28563	6.04053	6.66525	5.59085
THC0290_N_0914	1656836	1657238	-1	3prime-PT	NA	403	1	0	1	403	0	THC0290_1428	THC0290_1428	0	NA	NA	NA	-	8.11429	8.01783	7.60154	7.91677	8.22932	8.30523	8.48587	10.3789	8.75794	8.56985	8.06776	7.73827	8.86977	8.43092	7.58182	7.66316	6.31527	8.01866	6.63192	5.18391	8.18692	8.47926	7.47057	7.9502	7.86665	7.90563	8.25279	8.26156	7.95288	8.18434	7.79957
THC0290_N_0915	1657239	1657241	-1	3prime	NA(CDS:THC0290_1429)	3	1	0	1	3	0	THC0290_1428	THC0290_1428	0	NA	NA	NA	-	NA	NA	NA	NA	NA	NA	NA	NA	NA	NA	NA	NA	NA	NA	NA	NA	NA	NA	NA	NA	NA	NA	NA	NA	NA	NA	NA	NA	NA	NA	NA
THC0290_N_0916	1657246	1657531	1	3prime	NA(CDS:THC0290_1428)	286	1	0	1	286	0	THC0290_1429	THC0290_1429	0	NA	NA	NA	-	6.65587	6.82282	6.82896	7.03392	7.29467	7.58172	7.97148	10.1932	8.30438	8.44932	6.88233	6.35764	9.51137	9.5004	8.41717	8.12636	7.54305	4.1249	7.14738	3.85333	7.246	7.16424	7.43277	7.48562	7.65133	7.59568	7.53195	7.63003	7.5816	7.71377	6.74671
THC0290_N_0921	1668796	1669027	-1	3prime-PT	NA	232	1	0	1	232	0	THC0290_1435	THC0290_1435	0	NA	NA	NA	-	4.64919	4.98165	5.28955	4.83338	5.82942	6.18486	6.69341	8.62327	7.10736	6.88532	5.27917	4.80774	6.3481	8.40448	6.74354	5.70462	7.90384	7.23724	3.90371	8.0899	4.84976	4.80404	3.95725	4.88247	4.69825	4.89198	5.26681	4.86705	4.81855	4.66009	4.69613
THC0290_N_0923	1669052	1669388	1	3prime	NA(CDS:THC0290_1435)	337	2	1	1	254	0	THC0290_1436	THC0290_1436;THC0290_N_0922	0	NA	NA	NA	-	7.33889	7.00888	7.14435	7.21554	7.8345	7.88011	8.68131	9.63359	9.19624	9.44037	7.03954	7.01763	7.88429	8.5431	8.73519	8.76562	7.59122	7.09237	8.09259	5.18222	7.43071	7.43476	7.02273	7.21732	7.06176	7.08733	7.38493	7.5787	7.1861	7.49344	6.5476
THC0290_N_0927	1672070	1672324	-1	3prime	NA(CDS:THC0290_1440)	255	1	0	1	180	0	THC0290_1439	THC0290_1439	0	NA	NA	NA	-	6.96271	7.06506	6.71091	6.96694	6.63761	6.43105	6.40376	7.21049	6.58037	6.13001	6.94528	7.07974	7.12028	5.16958	6.24548	6.42026	7.05601	3.97034	5.4562	3.99859	6.71749	7.02467	6.38727	6.39575	6.54005	6.61598	6.9396	7.2358	7.18743	7.65474	6.35061
THC0290_N_0929	1673625	1673962	1	3prime	speE(CDS:THC0290_1441)	338	1	0	1	338	0	THC0290_1442	THC0290_1442	0	NA	NA	NA	-	5.52912	6.10016	5.70885	6.26946	6.89727	6.73886	7.09665	8.99027	7.87479	7.56606	6.03351	5.68612	8.79921	8.55291	7.80075	8.33382	8.89993	8.31364	7.39706	5.66887	6.03706	5.52674	5.65505	5.33922	5.92441	5.37925	6.84835	6.82301	6.41719	6.56559	5.31475
THC0290_N_0934	1680444	1680996	-1	3prime-PT	NA	553	2	1	1	251	0	THC0290_1447	THC0290_1447;THC0290_N_0935	0	NA	NA	NA	-	5.62892	5.91104	4.80086	4.92362	4.78007	6.19145	5.46555	8.64162	5.55643	6.81313	5.14932	4.79566	6.81577	3.876	5.34168	5.54209	3.87667	6.27644	6.58705	5.21777	6.06609	5.90886	5.52536	6.17156	5.33227	5.28578	4.28107	4.84269	5.30832	5.31726	5.21873
THC0290_N_0939	1683788	1684364	-1	3prime	gltP (CDS:THC0290_1452)	577	3	1	2	511	0	THC0290_1450	THC0290_1450;THC0290_1451;THC0290_N_0940	0	NA	NA	NA	-	6.93433	7.08142	6.90749	7.07346	6.73149	6.57701	6.33828	8.22043	7.16143	7.33409	7.37618	6.82002	7.10321	7.24252	6.69116	6.40812	8.08661	8.06221	8.11298	7.96803	7.22785	6.99025	7.55982	7.37844	7.43297	7.72556	6.80861	6.83456	7.23767	7.47186	7.02791
THC0290_N_0943	1688545	1688987	-1	3prime	NA(CDS:THC0290_1456)	443	1	0	1	339	0	THC0290_1455	THC0290_1455	0	NA	NA	NA	-	7.76644	7.57469	6.44874	6.38864	6.02822	6.18672	6.11545	7.44156	6.00052	5.82851	6.54389	6.26251	6.87067	7.04914	4.77723	5.72935	4.93206	6.06911	3.92927	3.9347	8.18974	8.4119	8.2453	8.7186	8.37859	8.94563	7.28731	7.36852	8.11411	8.207	6.55387
THC0290_N_0957	1713144	1713623	-1	3prime-PT	NA	480	2	1	1	447	0	THC0290_1473	THC0290_1473;THC0290_N_0958	0	NA	NA	NA	-	6.70388	6.53528	6.4035	6.46276	6.09151	6.70821	5.83426	7.97106	6.02074	5.86044	6.32453	6.11001	4.25399	4.67658	5.54712	5.74442	4.39868	5.30784	7.40124	3.99403	6.42076	6.85608	6.26555	6.42626	5.92875	6.30049	5.84694	6.06397	6.33311	6.88557	6.08546
THC0290_N_0960	1716728	1717015	-1	3prime-PT	NA	288	1	0	1	279	0	THC0290_1477	THC0290_1477	0	NA	NA	NA	-	7.43026	7.15852	7.37029	7.55492	7.40281	7.76723	7.80276	8.05928	7.68637	9.2928	7.07899	6.84646	9.26248	8.75999	9.1406	9.06519	8.45951	8.79813	7.87435	4.32875	7.24472	7.17141	7.46881	7.3524	7.68537	7.98711	7.33522	7.6703	7.04088	7.15598	7.25121
THC0290_N_0963	1717045	1717466	1	3prime-PT	NA	422	1	0	1	403	0	THC0290_1478	THC0290_1478	0	NA	NA	NA	-	7.1161	7.3514	6.98325	7.12097	7.24402	7.65419	7.35489	7.38497	9.18985	9.45373	7.07923	6.84613	9.0321	8.93293	7.92989	7.88771	8.47801	8.67101	8.99265	7.46543	7.3919	7.18883	6.80084	6.56324	6.57294	7.13015	7.49418	7.3409	7.31258	7.33644	7.11597
THC0290_N_0968	1723329	1723684	1	3prime	NA(CDS:THC0290_1484)	356	2	1	1	191	0	THC0290_1485	THC0290_1485;THC0290_N_0967	0	NA	NA	NA	-	7.72982	7.64752	7.42853	7.65018	7.58856	8.05032	7.34947	9.43962	8.03889	8.18107	7.61921	7.43426	8.72014	8.55508	7.35201	7.68831	6.03422	8.34062	8.71865	8.8315	8.27546	8.10759	7.65082	7.46486	8.05132	7.42712	8.37878	8.12098	7.74889	8.07554	7.47882
THC0290_N_0985	1746723	1746924	-1	3prime	NA(CDS:THC0290_1505)	202	2	1	1	127	0	THC0290_1504	THC0290_1504;THC0290_N_0986	0	NA	NA	NA	-	6.74458	6.53903	5.85683	5.53686	5.96093	6.58825	6.15964	8.65827	7.22712	6.61609	6.03534	5.60742	6.74544	3.86441	3.85333	5.73504	3.85333	4.01817	3.8874	3.85333	6.46494	7.12905	6.27197	6.66506	6.82524	6.79865	6.07613	6.25736	5.85223	6.15992	6.08267
THC0290_N_0986	1746850	1747483	1	intra	NA(CDS:THC0290_1506);NA(CDS:THC0290_1504)	634	2	1	1	495	0	THC0290_1505	THC0290_1505;THC0290_N_0985	0	NA	NA	NA	-	5.82064	5.83001	5.38618	5.38283	5.24351	5.24352	5.2341	4.87938	4.38356	4.20505	5.31531	5.33092	5.88959	4.39828	4.63239	4.12426	4.05292	4.58553	6.14848	4.8662	6.07957	6.0102	5.34581	6.22081	5.62917	5.72283	5.59372	5.67419	5.13543	4.55556	5.67054
THC0290_N_0990	1752763	1753784	-1	3prime	NA(CDS:THC0290_1511)	1022	2	0	1	213	1	THC0290_1510	THC0290_1509;THC0290_1510	0	NA	NA	NA	-	7.92083	7.8535	7.68019	7.89841	8.56694	8.40283	8.98716	8.32783	7.2298	8.05845	7.71588	7.72343	8.01973	7.24163	8.2988	8.11334	7.97289	8.42656	8.09917	8.4856	8.00178	8.08607	7.49717	7.82408	7.54449	7.55939	8.22316	8.39805	8.20254	8.51324	7.66845
THC0290_N_1007	1791417	1792042	-1	3prime	NA(CDS:THC0290_1537)	626	3	2	1	480	0	THC0290_1536	THC0290_1536;THC0290_N_1006;THC0290_N_1008	0	NA	NA	NA	-	8.70001	8.59988	8.72116	8.62233	7.95244	8.81412	7.6902	10.6046	6.85817	8.13056	8.85787	8.44382	9.10384	7.17455	7.33648	7.71198	4.27381	7.94787	6.7423	4.38691	8.59534	9.22255	8.36385	8.76857	8.67692	8.71697	8.0046	8.12047	9.05362	9.22826	8.31853
THC0290_N_1008	1791968	1792228	1	3prime	NA(CDS:THC0290_1536)	261	2	1	1	186	0	THC0290_1537	THC0290_1537;THC0290_N_1007	0	NA	NA	NA	-	5.9516	5.84542	6.15384	6.35945	6.89755	7.21832	7.22808	10.5111	7.7198	8.28896	6.18544	5.713	7.4424	8.06517	6.66298	7.02894	6.63143	6.70242	7.49413	5.32918	5.52631	5.83026	5.30272	5.624	5.3085	5.60539	6.73352	6.7677	5.82437	6.21668	5.59027
THC0290_N_1010	1793424	1793502	1	indep	NA	79	1	0	1	79	0	THC0290_1538	THC0290_1538	0	NA	NA	NA	-	5.03022	3.89681	5.27158	5.79589	5.85748	7.78211	6.91818	11.0175	6.07064	8.47063	5.04869	4.63085	9.49575	7.23108	6.25037	7.18912	6.87891	9.12334	3.93195	6.21924	4.07001	5.20303	5.15009	4.21823	3.93252	4.07332	4.36798	4.67932	4.8869	5.3072	4.59217
THC0290_N_1013	1797054	1798144	-1	3prime	NA(Region:THC0290_N_1014)	1091	2	0	2	1004	0	THC0290_1543	THC0290_1542;THC0290_1543	0	NA	NA	NA	-	7.25952	7.22562	6.83553	7.37985	7.69571	8.13743	8.8563	9.33615	8.75909	8.8208	7.21326	7.12829	11.3758	10.7758	9.33548	8.92259	10.5213	10.9965	11.1314	10.6021	6.93493	7.17903	6.4293	6.57419	6.21176	6.494	7.22454	7.45589	8.22337	8.40029	7.007
THC0290_N_1029	1808220	1808762	1	3prime	dbpA(CDS:THC0290_1554)	543	1	0	1	491	0	THC0290_1555	THC0290_1555	0	NA	NA	NA	-	7.27728	7.31552	6.6839	6.55439	7.13328	7.63384	7.4547	9.05319	8.78195	8.47373	6.92552	6.23532	8.63574	8.61001	8.22863	7.51036	7.76202	7.9028	3.98027	7.3105	7.43463	7.51821	7.63633	8.13006	8.30055	8.02554	7.22467	7.25779	6.69302	6.89111	7.13244
THC0290_N_1030	1811120	1811571	-1	3prime-PT	NA	452	1	0	1	445	0	THC0290_1557	THC0290_1557	0	NA	NA	NA	-	7.57966	7.71824	7.19263	7.22755	6.61924	6.95191	6.55755	8.68736	6.83404	7.72737	7.19907	7.10041	8.40057	8.32772	6.39624	6.47941	5.6369	7.66118	8.14592	4.25846	7.65143	7.75475	7.28395	7.28432	6.95416	7.46451	6.7377	6.4504	7.47132	7.48042	7.26342
THC0290_N_1031	1811565	1811830	1	3prime	menF(CDS:THC0290_1557)	266	2	1	1	196	0	THC0290_1558	THC0290_1558;THC0290_N_1032	0	NA	NA	NA	-	7.58848	7.52638	7.6368	8.03686	8.96966	8.92998	9.49141	9.37925	8.98652	9.00593	7.91434	7.44932	9.27605	9.49198	9.12116	9.08066	9.31583	8.79221	9.7551	9.37959	7.8977	7.30728	7.01883	7.39703	6.88827	7.18082	8.218	8.52279	7.47376	6.94134	7.49665
THC0290_N_1037	1813225	1813375	1	3prime	NA(tRNA:THC0290_tRNA_0029)	151	2	1	1	54	0	THC0290_N_1036	THC0290_1560;THC0290_N_1036	0	NA	NA	NA	-	7.99352	7.7137	7.40653	7.1968	6.85885	7.23379	7.17518	7.98224	7.37544	7.81524	7.45067	7.13678	8.21456	6.96499	6.44961	5.56582	7.56081	7.36881	4.12831	6.9681	8.31085	8.48716	7.98492	8.87776	8.07182	8.56883	6.85109	6.70463	6.69561	6.84289	6.98612
THC0290_N_1044	1827108	1827653	-1	3prime	engD(CDS:THC0290_1570)	546	1	0	1	229	0	THC0290_1569	THC0290_1569	0	NA	NA	NA	-	10.0016	9.5992	8.9956	8.94121	8.97374	9.23425	9.29583	8.61446	9.138	9.59062	9.26123	8.87199	9.1768	9.81509	9.39314	9.02355	8.27189	8.10558	6.21549	5.62835	10.1197	10.3007	10.256	10.5696	10.4926	10.7482	9.46193	9.56079	9.86757	9.85348	9.32141
THC0290_N_1053	1840491	1841109	-1	3prime	NA(CDS:THC0290_1585)	619	1	0	1	364	0	THC0290_1584	THC0290_1584	0	NA	NA	NA	-	7.86497	7.84567	7.88534	7.92359	8.35096	8.44673	8.71954	9.35682	8.97797	8.97528	7.85524	7.80818	9.65968	10.4563	9.25365	8.33676	9.73609	9.79472	9.84966	8.20867	8.02608	7.8529	7.75288	7.67113	8.16997	8.106	8.60085	9.08255	8.45137	8.23546	7.73049
THC0290_N_1072	1868837	1869005	-1	5prime	NA(CDS:THC0290_1609)	169	1	0	1	75	0	THC0290_1610	THC0290_1610	0	NA	NA	NA	-	9.78397	9.76849	9.49757	9.21588	7.82889	8.69343	9.34979	10.4386	8.41451	9.73701	9.15511	9.11536	11.1038	10.3471	10.6702	10.888	9.35895	9.83846	11.2319	7.57099	10.2038	10.5867	9.73439	10.3553	9.91171	10.3536	9.70206	9.66569	9.8638	10.2215	9.99967
THC0290_N_1073	1869574	1869721	-1	3prime	lgt(CDS:THC0290_1611)	148	1	0	1	86	0	THC0290_1610	THC0290_1610	0	NA	NA	NA	-	8.4803	8.6967	8.20052	8.30053	8.92855	8.79501	8.95087	10.6394	8.1923	7.6233	8.17892	8.18506	8.9087	10.008	9.12138	8.9933	8.96611	8.55662	3.92838	8.59732	9.08258	9.07514	8.68803	8.82527	8.61877	8.56562	8.63192	8.50125	9.41995	9.76111	8.27341
THC0290_N_1083	1885363	1885897	1	3prime	NA(CDS:THC0290_1622)	535	2	1	1	375	0	THC0290_1623	THC0290_1623;THC0290_N_1084	0	NA	NA	NA	-	8.25744	8.0329	7.56918	7.53334	7.8789	8.02939	8.58642	10.3889	9.52033	9.56124	7.54622	7.44916	9.41011	9.41499	8.65653	8.45174	7.80022	8.64132	8.23108	3.96666	8.16561	8.38055	8.5856	8.9677	9.12267	9.15809	7.91149	8.19674	7.59384	8.23216	7.53915
THC0290_N_1094	1896419	1896833	-1	3prime	glcD(CDS:THC0290_1636)	415	1	0	1	390	0	THC0290_1635	THC0290_1635	0	NA	NA	NA	-	8.30124	8.54844	8.76284	9.23862	9.86862	9.781	10.2362	10.8683	10.8515	10.4003	8.71919	8.52683	9.5662	10.0404	9.46327	9.48591	9.24777	9.95881	10.4877	8.23919	8.36852	8.25644	7.9601	8.05654	7.86912	7.86742	9.10853	9.23311	8.75275	8.73469	8.35011
THC0290_N_1095	1896834	1897089	1	3prime	NA(CDS:THC0290_1635)	256	1	0	1	256	0	THC0290_1636	THC0290_1636	0	NA	NA	NA	-	6.73014	6.79409	7.699	6.56674	6.81419	7.02873	7.40403	7.84577	8.03822	8.11886	6.34123	6.44581	8.25726	7.51931	7.9095	6.34004	8.45395	6.51266	8.83015	4.61005	6.99493	7.13756	6.86561	7.19239	7.14884	6.9895	7.06439	6.94634	6.91502	6.83885	6.78685
THC0290_N_1096	1900766	1900839	-1	3prime	NA(CDS:THC0290_1639)	74	1	0	1	72	0	THC0290_1638	THC0290_1638	0	NA	NA	NA	-	5.32932	5.34256	5.87998	5.36701	5.40662	6.91974	5.91502	7.85367	7.10734	8.37678	5.37865	4.77872	8.28238	4.01617	5.62025	5.54308	3.98821	7.56581	8.35956	5.62596	5.51487	4.88311	5.34648	5.60089	5.73341	5.99645	5.7804	5.61266	5.1239	4.98284	4.82339
THC0290_N_1102	1908771	1909021	-1	indep	NA	251	1	0	1	251	0	THC0290_1645	THC0290_1645	0	NA	NA	NA	-	6.5384	6.374	6.02823	6.38982	6.40758	6.62443	6.76022	7.48844	6.78564	7.39815	6.09454	6.04487	6.63409	4.13493	4.05513	5.73536	4.26592	7.07229	7.83499	10.0274	6.21956	6.39078	6.63458	7.00915	6.69688	6.57224	6.0864	5.60246	7.68147	7.77144	5.75765
THC0290_N_1131	1949602	1950013	1	3prime	phuR(CDS:THC0290_1679)	412	2	1	1	328	0	THC0290_1680	THC0290_1680;THC0290_N_1132	0	NA	NA	NA	-	5.40539	5.15047	5.19386	5.55101	4.92167	5.4649	6.20129	7.20739	8.48768	7.75625	5.16935	4.79196	8.50067	8.69743	8.23066	7.57256	4.06346	3.9015	3.89854	6.33447	5.75438	5.81362	5.21521	5.6319	5.57109	5.71678	5.42425	5.22882	5.32788	5.51973	5.10496
THC0290_N_1135	1955249	1955613	-1	3prime	NA(CDS:THC0290_1683)	365	2	1	1	269	0	THC0290_1682	THC0290_1682;THC0290_N_1136	0	NA	NA	NA	-	7.35384	7.40714	6.65731	7.08293	6.08373	7.21302	6.37686	8.63695	4.39421	7.63933	7.10869	6.59078	6.6045	3.94072	3.91799	5.76767	3.98664	7.54994	5.8445	3.98466	7.504	7.40087	6.40875	7.08563	6.87802	6.9771	6.55052	6.76714	7.39344	7.10092	6.76947
THC0290_N_1136	1955518	1956143	1	3prime	ftsE(CDS:THC0290_1682)	626	2	1	1	530	0	THC0290_1683	THC0290_1683;THC0290_N_1135	0	NA	NA	NA	-	9.16952	8.87494	9.24459	9.67903	9.63007	9.96367	9.64418	9.65538	10.269	9.87523	9.59128	9.6228	9.91989	9.92135	9.74373	9.68935	9.35385	9.34907	8.96012	8.09165	9.32345	9.24579	9.47891	9.23832	9.19303	9.35205	8.84015	9.08429	9.29957	9.26284	8.6584
THC0290_N_1142	1963759	1963927	-1	indep	NA	169	1	0	1	163	0	THC0290_1692	THC0290_1692	0	NA	NA	NA	-	7.62761	7.33863	7.51812	7.54273	8.44217	10.166	9.36831	11.1221	10.0873	11.6349	7.81699	7.49497	11.3464	9.84786	8.39273	8.85862	10.0004	11.9838	12.1806	8.45225	7.72048	8.08274	6.46452	6.49832	6.39553	6.78818	7.6932	7.8168	7.89028	8.37899	7.73889
THC0290_N_1156	1990528	1990800	-1	3prime	menA(CDS:THC0290_1714)	273	1	0	1	251	0	THC0290_1713	THC0290_1713	0	NA	NA	NA	-	9.07815	8.91431	8.57088	8.83562	9.11192	9.12631	9.63587	9.60649	10.4768	10.2935	8.47018	8.18063	9.62643	9.96655	9.57535	9.15261	9.5057	9.35137	9.47741	9.27023	8.89104	8.87325	8.85576	9.07394	8.6479	8.6725	8.5681	8.85811	8.76055	8.78662	8.26557
THC0290_N_1157	1990779	1991250	1	3prime	NA(CDS:THC0290_1713)	472	1	0	1	450	0	THC0290_1714	THC0290_1714	0	NA	NA	NA	-	7.55787	7.70222	7.84953	8.07716	7.74774	7.67858	7.52596	6.88401	6.97138	6.65455	7.89096	7.81341	7.83285	8.14105	7.53958	6.6976	7.4539	7.18651	3.94221	6.94641	7.63827	7.27547	8.07025	7.93168	8.024	7.89519	8.02334	7.82757	7.69642	7.32081	7.45819
THC0290_N_1161	1995370	1995588	1	indep	NA	219	1	0	1	185	0	THC0290_1717	THC0290_1717	0	NA	NA	NA	-	5.20103	5.0017	6.2078	6.54945	7.34503	8.02631	8.13171	11.4366	9.63608	9.85442	6.3921	5.90006	11.1088	10.9602	9.90878	9.48648	11.4559	12.0574	13.1437	13.0602	5.05312	5.21986	5.01447	4.22797	4.5726	4.5891	6.8869	6.72491	5.32983	5.69281	4.83322
THC0290_N_1166	2005128	2005343	-1	5prime	proS(CDS:THC0290_1719)	216	1	0	1	164	0	THC0290_1720	THC0290_1720	0	NA	NA	NA	-	8.34234	8.49998	8.83836	8.9335	9.57507	9.23839	9.73974	11.5891	10.2333	10.1131	8.96624	8.9135	10.9172	10.647	10.0902	8.98929	10.5605	10.9562	11.5624	11.3571	8.27173	8.32951	8.22814	8.09137	8.12644	8.1859	8.84333	8.92827	7.24129	7.02074	8.43851
THC0290_N_1180	2033014	2033819	-1	3prime	NA(CDS:THC0290_1745)	806	2	1	1	736	0	THC0290_1744	THC0290_1744;THC0290_N_1181	0	NA	NA	NA	-	6.91719	6.79355	6.5753	6.61909	7.15426	7.17937	8.0653	9.80432	9.49505	9.17052	6.63869	6.62616	9.8908	10.3701	9.78394	9.52805	9.87312	9.60818	9.76966	10.137	6.9556	6.97273	6.69358	6.97846	6.96098	6.97548	6.95156	6.96391	7.76702	7.90147	6.54574
THC0290_N_1181	2033750	2034014	1	3prime	NA(CDS:THC0290_1744)	265	2	1	1	195	0	THC0290_1745	THC0290_1745;THC0290_N_1180	0	NA	NA	NA	-	7.37878	6.98019	7.04277	7.49343	7.34442	7.95308	7.63768	10.9293	8.4386	7.61987	7.22047	6.85571	7.46639	3.87749	5.70135	5.77777	4.12059	7.17229	8.50443	6.43217	7.32747	7.51013	6.13975	6.60143	6.19483	6.51621	7.53591	7.77464	6.82188	6.94071	6.53511
THC0290_N_1182	2035079	2035241	-1	3prime	folP(CDS:THC0290_1747)	163	1	0	1	70	0	THC0290_1746	THC0290_1746	0	NA	NA	NA	-	7.33876	7.24361	7.04843	7.37208	7.49019	7.68336	7.47962	9.41556	8.28812	8.20977	7.22359	7.07506	7.46049	8.17677	7.99592	7.07309	9.3284	7.95018	4.72096	10.0643	7.25103	7.54092	6.91752	7.00533	6.66823	6.57738	7.26924	7.40291	7.53315	7.8675	6.96464
THC0290_N_1186	2039369	2039848	1	3prime-PT	NA	480	2	1	1	304	0	THC0290_1752	THC0290_1752;THC0290_N_1185	0	NA	NA	NA	-	7.75145	7.85507	7.81363	7.70905	7.44029	7.2037	7.30249	8.53514	6.37202	7.42729	7.6622	7.79374	8.31768	8.13569	8.3328	7.98356	6.92653	7.35564	6.69531	6.20353	7.96214	8.20815	7.44463	7.16282	7.11856	7.5968	8.06302	8.27225	9.06206	9.76021	7.87246
THC0290_N_1190	2044074	2044275	1	indep	NA	202	1	0	1	202	0	THC0290_1758	THC0290_1758	0	NA	NA	NA	-	8.78164	8.7407	8.39411	8.89055	9.33166	9.91104	10.222	11.4409	11.5038	11.5143	8.74672	8.62277	11.8568	12.3038	11.4213	10.7988	13.2797	12.4386	12.5602	14.002	8.96211	8.59348	8.89803	8.69013	8.57723	8.39568	8.86506	8.92842	9.13836	8.85101	8.0103
THC0290_N_1192	2048058	2048409	-1	3prime	aroK(CDS:THC0290_1765)	352	1	0	1	352	0	THC0290_1764	THC0290_1764	0	NA	NA	NA	-	6.20458	6.37025	5.88875	6.47263	6.49493	7.07187	6.7788	9.47474	6.52466	7.80478	5.89904	5.79479	8.00786	6.34081	7.04633	7.10426	6.21155	6.30497	8.83058	8.5946	6.09595	6.74741	6.24027	6.45953	6.22853	6.43561	6.77154	6.88367	6.32281	6.34342	6.2362
THC0290_N_1193	2048419	2048605	1	3prime	pyrR2(CDS:THC0290_1764)	187	1	0	1	187	0	THC0290_1765	THC0290_1765	0	NA	NA	NA	-	9.09943	9.09604	9.3504	9.55187	10.2531	10.2373	10.0401	11.4955	10.0867	9.81959	9.40453	9.39927	9.34838	9.93852	9.19143	9.37791	8.4451	9.13429	8.34919	6.61907	9.1168	8.9003	8.61027	8.60777	8.76746	8.53207	9.43089	9.66672	9.07678	9.04354	8.78406
THC0290_N_1199	2063397	2064482	1	indep	NA	1086	4	1	3	906	0	THC0290_1780	THC0290_1779;THC0290_1780;THC0290_1781;THC0290_N_1200	0	NA	NA	NA	-	7.2815	6.96665	7.45113	7.58659	8.26364	8.43056	8.89583	7.25966	9.0639	8.31544	7.54798	7.21049	8.19768	9.10028	8.5191	8.13155	9.47345	8.46308	9.46089	9.5919	7.2135	6.78719	6.46793	6.50401	6.30254	6.14689	7.13882	7.36509	7.49068	7.39869	6.79463
THC0290_N_1202	2074019	2074225	-1	3prime	deoD(CDS:THC0290_1790)	207	1	0	1	207	0	THC0290_1789	THC0290_1789	0	NA	NA	NA	-	8.2365	8.1511	7.92845	8.23258	8.5198	8.24626	8.43027	9.35638	8.47472	8.33855	8.21351	7.90631	8.25943	7.44502	8.34666	8.87082	7.63702	7.81792	8.7046	5.65024	7.89958	8.04744	8.28065	8.27186	8.38005	8.30397	7.65284	7.92065	8.13423	8.39322	7.92168
THC0290_N_1203	2074261	2074528	1	3prime	NA(CDS:THC0290_1789)	268	1	0	1	268	0	THC0290_1790	THC0290_1790	1	2074379,2074462,+	0.984	84	VSGNDNFRNSAHSYTICANVFNHFILR	7.34424	7.47353	7.15191	7.49535	7.97055	7.5591	8.05766	8.73811	6.5971	4.9437	7.28089	7.23645	5.59329	5.16205	4.1411	4.51196	7.12329	5.28252	5.98289	4.7572	7.51474	7.38498	7.02539	7.38002	6.93081	7.28617	7.63831	7.63321	7.64081	7.38688	6.80504
THC0290_N_1211	2094693	2095147	-1	3prime	NA(CDS:THC0290_1809)	455	1	0	1	455	0	THC0290_1808	THC0290_1808	0	NA	NA	NA	-	8.31886	8.35329	8.34058	8.41276	9.46653	9.7202	10.1597	11.0003	8.75619	9.00662	8.28872	8.3574	9.63923	9.04736	9.02766	8.87164	7.71885	9.22727	8.34107	5.73211	8.29645	8.62597	8.43713	8.44141	8.13561	8.70865	8.65089	8.42076	8.67567	8.77294	8.25617
THC0290_N_1212	2095152	2095693	1	3prime	fecA(CDS:THC0290_1808)	542	2	0	2	538	0	THC0290_1809	THC0290_1809;THC0290_1810	0	NA	NA	NA	-	8.03193	7.96678	7.99711	8.47625	9.07472	8.73168	9.26771	10.5481	8.56282	8.73817	8.44824	8.19717	9.48349	8.4065	8.23238	8.43564	6.87567	9.75192	9.21917	8.2119	8.09801	7.87962	7.3641	7.41792	7.66656	7.45757	8.34505	8.49588	7.97727	7.85308	8.04653
THC0290_N_1216	2101338	2101475	1	3prime-PT	NA	138	1	0	1	70	0	THC0290_1817	THC0290_1817	0	NA	NA	NA	-	3.92225	4.1877	4.33296	4.18116	6.20436	6.50946	7.07072	8.38725	9.02547	9.44663	4.951	5.39036	6.55105	6.70103	6.83024	6.82643	6.40212	5.38227	5.28503	4.85948	4.34773	3.91219	4.0865	3.92544	4.00784	3.98025	4.24651	4.40574	3.96712	4.24535	4.39136
THC0290_N_1242	2156379	2156695	1	3prime	NA(CDS:THC0290_1855)	317	2	1	1	128	0	THC0290_N_1243	THC0290_1856;THC0290_N_1243	0	NA	NA	NA	-	9.41294	9.36178	9.22319	9.54407	9.59701	9.80289	9.67593	9.94306	8.82588	9.12885	9.37683	9.21688	8.80869	8.3495	8.39323	8.40341	8.37667	7.96484	9.18745	9.8911	9.3825	9.12829	9.24072	9.00964	8.96171	8.80182	9.52054	9.8613	9.59604	9.48052	9.14331
THC0290_N_1244	2158851	2159374	-1	3prime-PT	NA	524	1	0	1	508	0	THC0290_1858	THC0290_1858	0	NA	NA	NA	-	7.35943	7.52986	7.8847	8.23866	8.3904	8.68302	9.13264	10.5142	8.98649	9.77489	7.84048	7.72193	10.6146	10.5002	10.5411	10.3834	9.91808	10.1215	10.1031	8.70561	7.42772	7.58525	7.58305	7.28175	6.73729	7.50918	7.75026	7.88004	9.10497	9.09532	7.56224
THC0290_N_1245	2159359	2159621	1	3prime	NA(CDS:THC0290_1858)	263	2	1	1	199	0	THC0290_1859	THC0290_1859;THC0290_N_1246	0	NA	NA	NA	-	8.68129	8.90612	8.23767	8.82958	9.05903	9.27654	9.46693	10.0515	9.90949	10.3092	8.24769	8.04003	10.2613	9.38977	8.55744	6.94634	8.63504	9.87311	10.2333	7.64002	9.35203	8.09202	8.40697	8.74286	8.31886	8.71786	8.58368	8.67271	7.81012	6.92906	8.30392
THC0290_N_1249	2163005	2163365	-1	3prime	NA(CDS:THC0290_1864)	361	1	0	1	350	0	THC0290_1863	THC0290_1863	0	NA	NA	NA	-	8.02996	7.83013	7.64445	8.10622	8.6458	8.69142	9.4683	10.8295	9.56084	9.26397	8.1169	7.70664	8.90033	9.10191	9.03086	9.34167	3.95744	8.48512	8.89528	7.50653	7.90668	7.74337	7.79023	8.38172	8.20373	8.42273	7.82687	8.01631	7.10701	7.12089	7.50839
THC0290_N_1250	2163355	2164120	1	3prime	NA(CDS:THC0290_1863)	766	1	0	1	755	0	THC0290_1864	THC0290_1864	0	NA	NA	NA	-	8.12841	8.45032	8.34562	8.4815	8.32555	8.41426	8.05464	7.72718	7.15855	7.24794	8.251	8.09294	8.80206	8.48716	7.52012	7.28433	8.77028	8.03423	7.88835	6.61991	8.40783	8.56498	7.67713	7.48613	7.22877	7.36498	9.07393	9.06903	9.28215	9.25725	8.00211
THC0290_N_1260	2180084	2180270	1	3prime	pepX2(CDS:THC0290_1874)	187	1	0	1	118	0	THC0290_1875	THC0290_1875	0	NA	NA	NA	-	6.56181	6.36928	6.34011	6.13954	6.7137	7.27919	7.54289	7.47594	8.30293	8.43947	6.07589	5.5526	7.33097	8.38849	6.95178	5.72681	9.42418	7.87519	8.87416	9.10134	6.5196	6.07466	6.35559	6.04272	6.01399	6.49393	6.50859	6.25614	6.86809	6.03421	6.53526
THC0290_N_1263	2191188	2191555	-1	3prime	NA(CDS:THC0290_1884)	368	2	1	1	113	0	THC0290_N_1264	THC0290_1883;THC0290_N_1264	0	NA	NA	NA	-	7.99216	7.80626	7.51294	7.56079	7.59295	7.46429	7.35387	9.05323	8.70282	8.47095	7.41105	7.47312	8.58245	8.91631	7.33986	7.73114	7.64309	8.63764	9.5384	7.72587	7.86623	7.88217	7.97381	7.70448	8.12686	7.753	8.10388	8.00635	7.23011	7.52776	7.3399
THC0290_N_1264	2191301	2191847	1	3prime	mutB(CDS:THC0290_1883)	547	3	2	1	123	0	THC0290_N_1263	THC0290_1884;THC0290_N_1263;THC0290_N_1265	1	2191620,2191778,+	0.621	159	MTIITFLVTSPFAIGRVTCMALDAVNYFIVTMFKNTYKNIFQMQFVIQILID	7.34134	7.16137	7.57673	7.68556	8.17145	8.05428	7.52114	9.46673	8.67514	7.62118	7.48816	7.59275	7.71845	7.85673	7.84657	7.57437	7.63599	8.39269	8.93608	6.98731	7.60804	7.46503	7.30671	7.24435	7.54553	7.7542	7.765	7.70753	6.91612	7.13337	6.93096
THC0290_N_1278	2208899	2209758	-1	3prime	NA(CDS:THC0290_1902)	860	2	1	1	698	0	THC0290_1901	THC0290_1901;THC0290_N_1277	0	NA	NA	NA	-	7.1343	7.05025	7.38252	7.64108	7.88067	8.33892	8.29668	10.2418	7.64946	8.0087	7.62925	7.38829	8.90461	7.52395	8.16773	8.06953	6.83111	8.05011	8.44115	6.38737	6.96176	7.20063	6.87223	7.08723	6.79299	7.02237	7.442	7.31634	7.575	7.79646	6.94203
THC0290_N_1279	2209763	2210285	1	3prime	NA(CDS:THC0290_1901)	523	1	0	1	523	0	THC0290_1902	THC0290_1902	0	NA	NA	NA	-	6.68975	6.13984	6.44565	6.48041	6.72495	7.31616	7.22641	10.2798	8.53692	8.31121	6.09685	6.04971	8.80119	8.09199	7.81239	7.38568	7.06137	9.13152	8.78945	7.79507	6.43035	6.91331	5.88074	6.4215	6.03885	6.5103	6.51789	6.65793	6.33948	6.79593	5.78385
THC0290_N_1288	2222573	2222733	-1	3prime-PT	NA	161	1	0	1	161	0	THC0290_1912	THC0290_1912	0	NA	NA	NA	-	6.7385	6.67073	6.7003	7.61608	9.15096	9.42397	10.4828	12.1245	11.8167	11.4456	6.71458	6.13544	11.4361	11.3821	10.3161	10.0325	11.0301	11.3216	11.0154	7.7929	6.47924	6.27964	6.80019	7.08736	6.97189	6.83061	7.14225	7.75604	6.69336	6.38851	6.70241
THC0290_N_1324	2285049	2285149	-1	3prime	lipB(CDS:THC0290_1958)	101	1	0	1	101	0	THC0290_1957	THC0290_1957	0	NA	NA	NA	-	9.25844	8.67184	8.56412	8.9142	9.59664	9.85808	10.5956	9.91937	11.0649	10.6999	8.74152	8.50085	10.5624	10.7831	10.2069	9.96709	10.16	10.1089	9.19367	10.4518	8.99509	8.72886	8.88307	8.74222	8.86577	9.11322	8.86424	9.00961	8.84138	8.84922	8.34937
THC0290_N_1325	2285156	2285362	1	3prime	rnhB(CDS:THC0290_1957)	207	1	0	1	207	0	THC0290_1958	THC0290_1958	0	NA	NA	NA	-	7.34575	7.54379	7.35115	7.74192	7.94371	7.74451	7.69469	7.74251	6.25815	7.29421	7.20331	7.43718	6.43235	4.13162	3.91031	5.35612	4.19819	6.63867	3.98361	6.77124	7.49242	7.26272	6.58895	6.52428	6.53101	6.43567	7.7794	7.70357	6.33478	6.2887	7.5667
THC0290_N_1331	2295401	2295816	-1	3prime-PT	NA	416	1	0	1	416	0	THC0290_1967	THC0290_1967	0	NA	NA	NA	-	5.08043	5.14064	5.29517	5.6736	6.60825	6.79911	7.5032	8.68608	8.97804	9.19422	5.12815	4.68722	10.0208	10.0072	10.0261	9.56324	9.82965	9.67192	5.89114	4.07112	5.478	5.30714	5.41565	5.61953	5.20179	6.14308	6.31653	6.10443	8.6331	8.7347	5.21916
THC0290_N_1332	2295817	2295864	-1	3prime	NA(CDS:THC0290_1968)	48	1	0	1	48	0	THC0290_1967	THC0290_1967	0	NA	NA	NA	-	NA	NA	NA	NA	NA	NA	NA	NA	NA	NA	NA	NA	NA	NA	NA	NA	NA	NA	NA	NA	NA	NA	NA	NA	NA	NA	NA	NA	NA	NA	NA
THC0290_N_1333	2295869	2296343	1	3prime	NA(CDS:THC0290_1967)	475	1	0	1	475	0	THC0290_1968	THC0290_1968	0	NA	NA	NA	-	8.64795	8.46285	7.75306	7.64176	7.17704	7.15193	7.04125	7.96943	6.8674	8.03948	8.13019	7.60439	9.10202	7.43816	6.59793	6.06671	6.08059	8.20666	9.95497	7.79635	9.39296	8.87835	8.06469	8.82992	8.09114	8.49158	7.59278	7.50056	6.79241	5.98487	7.7332
THC0290_N_1340	2307904	2308585	-1	indep	NA	682	1	0	1	682	0	THC0290_1979	THC0290_1979	0	NA	NA	NA	-	7.5983	7.25097	7.18591	7.78564	7.50243	7.58222	8.10894	7.22078	9.39579	8.91822	7.42382	7.56688	8.74012	10.3545	9.62628	8.87249	11.1517	9.79415	11.1837	12.2443	7.51026	6.93467	7.64439	7.25	7.24062	6.96387	7.26827	7.42358	8.88831	9.06	6.95699
THC0290_N_1343	2311981	2312224	-1	3prime	mscS3(CDS:THC0290_1986)	244	1	0	1	219	0	THC0290_1985	THC0290_1985	0	NA	NA	NA	-	6.53858	6.40068	5.90661	5.66681	6.16457	6.30477	6.61017	9.44512	6.89552	6.96057	6.08544	5.83069	7.93587	3.88636	4.23604	4.47084	3.93961	7.09037	7.94522	3.92878	6.71594	6.58667	6.2098	6.45086	6.50357	6.70519	6.13587	5.88516	6.27025	6.41795	5.89946
THC0290_N_1344	2312200	2312884	1	3prime	NA(CDS:THC0290_1985)	685	1	0	1	660	0	THC0290_1986	THC0290_1986	0	NA	NA	NA	-	7.63619	7.57652	7.42634	7.45965	7.44617	7.56459	8.13224	7.74127	9.36021	9.16378	7.45661	7.21183	9.76476	10.201	9.64997	8.9717	11.1352	10.5016	10.2006	11.6503	7.66287	7.36445	7.28486	7.59066	7.07963	7.29168	7.5181	7.48229	8.26103	7.87154	7.35901
THC0290_N_1349	2325837	2326693	1	3prime	NA(CDS:THC0290_1999)	857	1	0	1	723	0	THC0290_2000	THC0290_2000	0	NA	NA	NA	-	7.40164	7.24318	6.53662	6.80228	7.02959	7.09448	7.30017	7.8231	8.43127	7.827	7.204	6.98381	8.80796	9.69097	9.21647	8.68159	9.90161	9.49029	9.40029	9.93618	7.6211	7.82767	6.86548	7.19405	7.23332	6.97461	6.97251	7.23213	9.50991	9.54486	6.61084
THC0290_N_1357	2359706	2360343	-1	3prime-PT	NA	638	1	0	1	636	0	THC0290_2032	THC0290_2032	0	NA	NA	NA	-	8.07361	8.05833	7.52165	7.44835	7.2614	7.72843	7.17268	8.38378	7.11619	7.91269	7.62191	7.37949	7.35707	3.87022	4.04796	5.28044	5.32709	6.68552	5.90798	4.48393	8.09259	8.19394	8.20052	8.50254	8.12248	8.70271	7.53469	7.69102	8.76162	8.78265	7.78707
THC0290_N_1361	2365864	2366006	1	indep	NA	143	1	0	1	143	0	THC0290_2036	THC0290_2036	0	NA	NA	NA	-	5.13377	3.98473	4.54839	3.95707	5.75398	6.38988	5.30541	6.73346	6.18531	7.00153	4.50924	4.16233	7.51832	5.15725	4.45284	5.00229	6.79336	8.30794	7.41629	3.93745	4.67154	4.75955	4.31645	4.00722	4.1888	4.46524	4.04939	4.47364	5.86083	5.71274	4.59072
THC0290_N_1366	2390770	2391502	-1	3prime-PT	NA	733	2	1	1	683	0	THC0290_2057	THC0290_2057;THC0290_N_1367	0	NA	NA	NA	-	7.34592	7.18321	6.57836	6.88469	7.07901	7.07843	7.50284	8.07674	7.23289	6.91816	6.70034	6.55009	7.44283	8.10163	8.29877	8.1277	8.27685	7.7591	7.91653	8.91307	7.35022	7.48657	7.33973	7.89707	7.53694	7.86623	7.10264	7.2468	6.29024	6.5143	6.3223
THC0290_N_1384	2423917	2424830	-1	3prime	NA(CDS:THC0290_2103)	914	4	3	1	735	0	THC0290_2102	THC0290_2102;THC0290_N_1385;THC0290_N_1386;THC0290_N_1387	0	NA	NA	NA	-	7.34242	6.71513	6.80094	7.25093	6.48268	7.06631	7.28981	8.72855	8.5022	8.9743	6.93319	6.16313	9.74653	9.94926	9.60059	9.41066	9.89863	10.0497	10.1119	6.56224	6.90946	7.17554	6.35914	6.73857	6.30236	6.60786	6.83172	6.96633	6.52867	7.04664	6.55126
THC0290_N_1389	2426425	2427442	-1	3prime	NA(CDS:THC0290_2105)	1018	1	0	1	709	0	THC0290_2104	THC0290_2104	0	NA	NA	NA	-	8.16003	7.99974	7.89284	8.14433	8.07172	7.83673	8.05689	8.53737	7.9426	7.32517	8.37771	8.14966	7.33612	7.41063	6.83246	7.27057	4.26225	6.09312	7.07512	3.883	8.02267	8.18008	7.04985	7.48498	7.1425	7.29989	8.00066	7.86065	8.52287	8.73921	7.87415
THC0290_N_1399	2443963	2444342	1	3prime	NA(gene:THC0290_2120)	380	1	0	1	380	0	THC0290_2121	THC0290_2121	0	NA	NA	NA	-	6.64926	6.50245	6.45573	6.67617	7.20219	7.58795	6.9872	10.2893	7.15379	7.3187	6.32298	6.33942	8.12182	6.23828	6.80421	6.33533	4.30989	6.04809	5.44341	3.98475	6.47362	6.53658	5.88794	5.85624	6.17523	5.99429	6.84034	7.13911	6.00355	6.7949	6.09622
THC0290_N_1400	2446771	2446834	-1	3prime	NA(CDS:THC0290_2126)	64	1	0	1	64	0	THC0290_2125	THC0290_2125	0	NA	NA	NA	-	5.03436	4.88677	4.35551	4.56764	5.32583	6.14075	5.58558	7.78394	6.58106	6.64673	4.91181	4.44089	6.00972	5.15486	4.10337	4.01371	7.15904	5.32589	8.73237	4.01563	5.03402	5.38548	4.35612	4.73571	4.43139	4.52277	5.20178	5.05041	4.31466	4.17612	4.6111
THC0290_N_1401	2446839	2447017	1	3prime	NA(CDS:THC0290_2125)	179	1	0	1	179	0	THC0290_2126	THC0290_2126	0	NA	NA	NA	-	5.29952	5.03799	4.17113	4.26609	4.52941	5.03697	4.26254	7.26354	5.88878	4.10037	4.82851	4.783	5.15343	5.76684	4.08388	4.11234	7.46031	6.6033	7.48681	7.41449	5.26839	5.19148	4.417	4.17155	4.18327	4.25002	5.41225	5.19489	4.83476	4.97106	4.59763
THC0290_N_1404	2453557	2454630	1	3prime	fabH1(CDS:THC0290_2130)	1074	1	0	1	1074	0	THC0290_2131	THC0290_2131	0	NA	NA	NA	-	8.69958	8.83574	8.51061	8.56848	8.62488	8.48025	8.82534	8.59822	8.54223	8.11932	8.67924	8.43634	9.89203	10.1738	9.36699	9.01138	9.24487	8.9368	9.29976	9.73611	8.88174	8.72266	8.39824	8.69664	8.44617	8.57296	8.69738	8.7992	8.88224	8.89741	8.50089
THC0290_N_1415	2474911	2475654	-1	3prime	murF(CDS:THC0290_2148)	744	2	1	1	308	0	THC0290_2147	THC0290_2147;THC0290_N_1416	0	NA	NA	NA	-	7.18563	6.71985	6.46821	6.85697	7.04659	8.10544	7.40892	11.1615	9.09643	9.67426	7.15394	6.15732	9.32933	8.72689	8.29694	7.81958	5.22503	8.84471	9.94447	9.58767	7.11713	6.9736	6.39072	6.76717	6.30114	6.51634	6.19884	6.77147	5.31063	6.28723	6.14348
THC0290_N_1418	2486848	2487333	1	3prime	NA(CDS:THC0290_2151)	486	1	0	1	464	0	THC0290_2152	THC0290_2152	0	NA	NA	NA	-	6.03646	5.8682	6.02169	6.26425	5.89023	6.74491	6.20975	8.49987	6.56393	7.33363	6.4941	6.1494	7.79583	7.40849	7.00728	6.584	5.98039	4.95014	6.47907	4.00561	6.05743	6.54085	5.5156	6.38252	5.92449	6.25079	6.20149	6.86832	6.76702	7.04657	5.96913
THC0290_N_1420	2487787	2488536	-1	3prime	NA(CDS:THC0290_2154)	750	2	1	1	446	0	THC0290_2153	THC0290_2153;THC0290_N_1421	0	NA	NA	NA	-	5.38322	4.98987	5.02424	5.17325	4.68914	6.02161	5.31858	7.59504	4.34852	5.99453	5.39184	5.12728	7.54871	5.14887	5.78062	5.41201	7.37244	6.67619	7.14069	4.74592	5.08649	5.24265	5.40157	5.69381	4.91464	5.16682	5.37515	4.76546	5.30485	5.43779	4.67056
THC0290_N_1423	2495249	2495787	1	3prime	NA(CDS:THC0290_2158)	539	3	2	1	79	0	THC0290_N_1424	THC0290_2159;THC0290_N_1424;THC0290_N_1425	1	2495575,2495640,+	0.996	66	MTTSSINIPVFLKINWYNFQE	8.68816	8.59284	9.21649	9.376	9.84923	10.612	10.0182	11.4945	9.88693	10.1342	9.94773	10.1945	10.2316	9.83671	9.95161	10.0956	7.56303	9.06933	9.73192	9.89684	8.81949	8.10542	9.01931	8.59059	8.66288	8.16482	8.47339	8.45896	8.82752	8.15726	9.17981
THC0290_N_1428	2503353	2503833	1	3prime	NA(CDS:THC0290_2166)	481	2	1	1	331	0	THC0290_2167	THC0290_2167;THC0290_N_1429	0	NA	NA	NA	-	7.82248	7.72345	7.56276	7.64147	7.59586	7.89188	7.6211	9.73214	8.64779	8.65877	7.75942	7.41658	7.95103	7.09579	7.31822	7.36347	7.97412	3.85333	8.82666	7.21585	7.47549	7.69654	7.41113	7.54981	7.60583	7.39535	7.26612	7.47948	7.40259	7.775	7.13094
THC0290_N_1439	2534669	2535271	-1	3prime	haaO(CDS:THC0290_2191)	603	1	0	1	603	0	THC0290_2190	THC0290_2190	0	NA	NA	NA	-	7.86826	7.74271	7.66528	7.92169	8.15329	7.79989	8.15274	9.65438	8.8526	8.02466	7.82309	7.56736	8.89072	9.52271	8.81832	8.47567	9.07076	8.68462	8.26491	7.66924	7.81922	8.10366	8.0276	8.01644	7.86976	7.82494	8.14926	8.0612	7.80361	7.94287	7.56882
THC0290_N_1453	2551193	2551513	-1	3prime	NA(CDS:THC0290_2203)	321	1	0	1	277	0	THC0290_2202	THC0290_2202	0	NA	NA	NA	-	7.04086	6.79733	7.10138	7.55006	7.35168	8.13537	8.03699	10.3853	8.55771	9.32453	7.38265	6.90241	9.03199	6.70231	7.06641	7.16804	7.07843	7.80381	9.06095	4.12394	6.70123	6.86173	6.38705	6.51799	6.17078	6.10793	7.06536	7.07967	7.31582	7.39332	6.78776
THC0290_N_1478	2617365	2617476	-1	3prime-PT	NA	112	1	0	1	112	0	THC0290_2261	THC0290_2261	0	NA	NA	NA	-	7.28731	7.57893	6.91735	7.21494	7.2473	7.50255	7.81781	8.33921	9.08528	9.40084	6.962	6.76498	8.86484	8.79393	8.66769	8.55154	10.5425	8.82362	9.19889	10.3279	7.31238	7.41471	7.69442	7.5556	7.36288	7.57596	6.93607	6.93022	9.16218	9.23365	7.31123
THC0290_N_1479	2617477	2617522	-1	3prime	NA(CDS:THC0290_2262)	46	1	0	1	44	0	THC0290_2261	THC0290_2261	0	NA	NA	NA	-	NA	NA	NA	NA	NA	NA	NA	NA	NA	NA	NA	NA	NA	NA	NA	NA	NA	NA	NA	NA	NA	NA	NA	NA	NA	NA	NA	NA	NA	NA	NA
THC0290_N_1480	2617554	2617695	1	3prime	NA(CDS:THC0290_2261)	142	1	0	1	142	0	THC0290_2262	THC0290_2262	0	NA	NA	NA	-	4.71712	4.88828	5.48855	5.64757	5.96149	6.79591	6.80953	7.62567	5.72413	8.15902	4.87256	4.81026	6.4321	3.86305	4.46296	4.15485	6.30393	4.02821	3.95904	3.86597	4.53945	4.67318	4.08546	4.18152	4.21572	4.2101	5.36653	5.84837	4.07673	4.32645	4.80742
THC0290_N_1481	2617697	2617845	1	indep	NA	149	1	0	1	149	0	THC0290_2262	THC0290_2262	0	NA	NA	NA	-	3.91812	3.87295	3.87877	4.32135	4.78221	6.45623	6.32637	8.51963	7.20221	7.62009	4.26106	3.95219	8.89059	7.99947	6.74743	4.3229	3.89968	8.64019	8.89161	6.50252	4.54186	3.85333	4.21918	3.85333	3.98898	3.87247	3.85333	4.21696	3.85333	3.89234	3.85333
THC0290_N_1489	2635977	2636194	-1	3prime	NA(CDS:THC0290_2279)	218	1	0	1	206	0	THC0290_2278	THC0290_2278	0	NA	NA	NA	-	7.93099	7.90116	8.77753	8.57152	9.4033	9.64749	9.90202	10.5912	9.66788	9.89354	8.76496	8.98845	9.74191	9.91479	9.33167	9.34612	10.6123	8.92057	8.64895	10.2807	7.9065	7.82725	7.97864	7.44645	7.87445	7.52801	8.80189	8.94118	8.62099	8.87527	8.24453
THC0290_N_1490	2636183	2636448	1	3prime	aat(CDS:THC0290_2278)	266	1	0	1	254	0	THC0290_2279	THC0290_2279	0	NA	NA	NA	-	7.7499	7.37232	7.18697	7.16454	7.65863	7.89451	8.28501	9.72259	6.91779	7.33272	7.0809	6.75472	7.35093	5.18887	7.37569	7.28006	6.71239	5.69504	5.7581	6.55214	7.78323	7.80383	6.5082	7.24408	6.79546	7.20677	7.6319	7.41465	7.15229	7.27999	7.10901
THC0290_N_1492	2637955	2638255	-1	3prime	NA(CDS:THC0290_2282)	301	1	0	1	301	0	THC0290_2281	THC0290_2281	0	NA	NA	NA	-	7.90534	7.74116	7.25103	7.2156	6.73406	6.89078	6.56633	8.42328	5.0924	6.76857	7.70753	7.21203	6.92093	6.47823	5.03576	4.4682	6.30737	7.66518	4.9772	6.05116	7.96895	8.16417	6.93472	7.55578	7.60171	7.57512	7.64766	7.42569	7.76702	7.94897	6.93096
THC0290_N_1493	2638260	2638680	1	3prime	NA(CDS:THC0290_2281)	421	1	0	1	421	0	THC0290_2282	THC0290_2282	0	NA	NA	NA	-	5.30707	5.35719	5.68927	6.07792	6.78451	6.99369	7.5149	8.54252	8.17036	7.4431	5.40026	5.26347	9.15884	9.27226	9.31889	9.00662	7.95125	9.38705	5.42011	6.92053	4.65429	5.7152	5.91636	5.68608	5.84034	5.31347	6.21042	6.69336	5.31465	5.67436	5.07559
THC0290_N_1497	2646734	2647346	-1	3prime	NA(CDS:THC0290_2291)	613	2	1	1	400	0	THC0290_2290	THC0290_2290;THC0290_N_1498	0	NA	NA	NA	-	5.91097	6.40783	5.81172	6.06655	6.25041	7.1517	6.88394	7.47076	7.97225	8.45036	6.08988	5.68272	8.80146	8.26994	7.75499	7.40799	8.35863	9.27514	9.32684	8.52775	5.65375	6.16738	5.74086	6.15899	6.08178	5.62175	6.8166	6.0458	6.29169	6.296	5.21638
THC0290_N_1498	2647134	2647823	1	3prime	NA(CDS:THC0290_2290)	690	2	1	1	420	0	THC0290_2291	THC0290_2291;THC0290_N_1497	0	NA	NA	NA	-	9.77026	9.8279	10.1492	10.2731	10.5644	10.673	10.3853	9.5756	9.67038	9.44844	10.0493	9.97896	10.6952	10.869	10.8254	10.5799	10.8469	10.4678	10.2906	9.76452	9.97148	9.98081	10.084	10.3218	9.94073	10.4466	10.3868	10.3457	10.0998	10.1647	9.16658
THC0290_N_1506	2659691	2659768	1	3prime	pckA(CDS:THC0290_2301)	78	1	0	1	40	0	THC0290_2302	THC0290_2302	0	NA	NA	NA	-	4.81278	4.68047	4.03081	4.17269	4.33728	4.3986	4.29625	6.60509	4.2787	6.31958	4.94409	3.95219	5.73243	3.91447	4.08295	3.86734	5.86054	4.38488	9.006	4.75344	4.13723	5.18504	5.04215	4.59211	5.14074	5.72688	4.27088	5.64272	4.53237	4.67084	3.90213
THC0290_N_1517	2672008	2672485	1	3prime	NA(CDS:THC0290_2316)	478	2	1	1	79	0	THC0290_N_1518	THC0290_2317;THC0290_N_1518	0	NA	NA	NA	-	8.5574	8.55059	9.49628	9.63635	10.155	9.6062	9.61731	11.0539	10.6325	9.96243	9.36476	9.95115	9.9456	10.9515	10.5785	10.2388	10.5824	9.92964	10.5282	10.5126	8.28304	8.58389	8.55697	8.13239	8.39373	8.4262	9.12786	9.3659	9.3318	9.86024	8.74407
THC0290_N_1523	2681617	2681861	-1	3prime	NA(CDS:THC0290_2325)	245	1	0	1	245	0	THC0290_2324	THC0290_2324	0	NA	NA	NA	-	7.93818	7.99414	7.8234	8.10546	8.37744	8.35941	8.43841	9.32481	8.41746	8.42783	8.01734	7.89235	7.65927	6.66425	7.2958	7.51986	4.69297	7.39152	8.62351	3.92769	7.93409	8.04363	6.59299	7.12485	6.86342	6.61582	8.02631	7.93375	7.81497	7.7891	7.87688
THC0290_N_1524	2681866	2681941	1	3prime	NA(CDS:THC0290_2324)	76	1	0	1	76	0	THC0290_2325	THC0290_2325	0	NA	NA	NA	-	9.05218	9.0135	8.32709	8.28316	6.85349	6.97429	5.95485	6.4865	3.97542	4.03519	8.57524	8.08331	5.26875	5.56581	4.18298	4.20888	7.05873	6.94905	6.82488	4.0821	9.49141	9.21034	9.59128	9.77862	9.38765	9.88783	8.28678	7.95082	8.83953	8.84307	8.32049
THC0290_N_1528	2689772	2690654	-1	3prime	NA(CDS:THC0290_2332)	883	3	1	2	816	0	THC0290_2330	THC0290_2330;THC0290_2331;THC0290_N_1529	0	NA	NA	NA	-	7.49293	7.40005	7.87978	8.43936	8.96026	8.60307	9.17514	10.4431	9.63215	9.50592	7.83781	7.83134	9.63668	9.3881	9.44589	9.32964	7.95685	9.50848	9.94142	9.81401	7.1335	7.1259	6.60234	6.44947	6.6428	6.40929	8.06414	8.24048	7.74602	8.00362	7.12668
THC0290_N_1530	2690659	2690892	1	3prime	NA(CDS:THC0290_2331)	234	1	0	1	234	0	THC0290_2332	THC0290_2332	0	NA	NA	NA	-	8.64285	8.27752	7.61131	7.65093	7.32407	7.78252	8.08143	8.50088	8.69105	8.54798	7.69496	6.86427	8.62402	8.01249	7.59396	7.48572	8.67794	8.13231	3.93681	9.48067	9.02053	8.60116	8.25732	8.77851	8.12678	8.71984	8.29219	8.04235	8.70882	7.98659	7.81816
THC0290_N_1536	2707558	2707724	-1	3prime	NA(CDS:THC0290_2340)	167	2	1	1	98	0	THC0290_2339	THC0290_2339;THC0290_N_1537	0	NA	NA	NA	-	6.21157	6.50787	6.02804	6.47347	6.16373	8.00216	7.30105	10.3917	8.09715	9.01417	6.10244	5.94709	8.28884	7.01529	6.73956	7.258	4.20753	5.60772	3.93402	4.65692	7.27394	6.53856	5.50238	6.59627	6.04126	6.16709	6.08406	5.70963	5.84814	6.29246	6.03903
THC0290_N_1539	2714843	2716394	-1	3prime-PT	NA	1552	3	1	2	1442	0	THC0290_2346	THC0290_2345;THC0290_2346;THC0290_N_1540	0	NA	NA	NA	-	6.74945	6.71477	7.13583	7.11578	7.03953	6.9525	7.16068	7.58157	8.30184	7.73986	7.28841	7.02681	7.78565	7.94412	7.67633	7.47143	7.6064	7.18806	8.07247	7.16228	6.89334	6.83179	6.59452	6.73278	6.87192	6.94042	6.36769	6.50234	7.10442	6.71447	6.5581
THC0290_N_1551	2730595	2731833	1	3prime-PT	NA	1239	3	1	2	883	0	THC0290_2361	THC0290_2360;THC0290_2361;THC0290_N_1550	0	NA	NA	NA	-	7.14197	7.20995	6.52212	6.51798	6.72394	6.94516	6.82561	7.48819	7.708	7.85728	5.89499	5.88372	8.85257	9.21148	6.64032	6.59569	7.56924	6.73988	7.93644	4.32562	7.48654	7.47597	7.97367	8.47826	8.07172	8.019	5.77502	5.87934	7.57999	7.40478	6.60975
THC0290_N_1552	2732367	2732608	-1	5prime	smf(CDS:THC0290_2361)	242	1	0	1	137	0	THC0290_2362	THC0290_2362	0	NA	NA	NA	-	7.86762	7.93479	7.45525	7.35393	7.00769	6.44912	6.20921	7.00101	8.59489	7.2014	7.63342	7.83689	8.62653	9.32986	8.42056	8.05636	8.94646	9.24838	9.50076	9.78563	7.89542	7.91312	8.25239	7.92019	8.12365	8.35369	7.23415	7.10003	7.15463	7.16175	7.52732
THC0290_N_1572	2758040	2758319	1	3prime	NA(CDS:THC0290_2385)	280	1	0	1	280	0	THC0290_2386	THC0290_2386	0	NA	NA	NA	-	6.37936	6.23635	7.60459	7.78784	9.86027	9.48791	10.4473	9.74602	10.53	10.1072	7.47445	7.72215	10.9132	11.3011	11.5296	11.4675	11.5242	11.2959	11.6737	11.8045	5.49735	5.9732	6.22933	4.93054	5.86965	6.41652	8.08773	8.3535	6.89264	7.04547	7.12727
THC0290_N_1573	2762770	2763055	-1	indep	NA	286	2	1	1	88	0	THC0290_N_1574	THC0290_2390;THC0290_N_1574	0	NA	NA	NA	-	7.80624	7.24629	8.13835	8.07873	9.25951	10.088	10.1351	12.1245	11.7929	11.7898	8.36564	7.99024	12.9303	12.5753	11.2099	11.0275	12.745	13.5118	13.1583	13.2675	7.50572	7.87828	6.8767	7.12567	7.25202	7.16267	8.42777	8.63789	8.89258	9.16857	7.6915
THC0290_N_1574	2762858	2763369	1	3prime	paaE(CDS:THC0290_2390)	512	3	2	1	203	0	THC0290_2391	THC0290_2391;THC0290_N_1573;THC0290_N_1575	0	NA	NA	NA	-	8.4819	8.37402	7.94606	8.10461	8.54738	8.81702	8.96742	10.2684	10.1474	10.1713	8.13817	8.08205	9.73789	9.78437	9.56431	9.43507	8.83442	9.13437	9.72404	9.25507	8.5487	8.62439	8.04778	8.48428	8.12419	8.42703	8.28587	8.32993	8.68124	8.89654	7.87644
THC0290_N_1577	2765596	2766547	1	intra	NA(Region:THC0290_N_1579);upp(CDS:THC0290_2393)	952	1	0	1	927	0	THC0290_2394	THC0290_2394	0	NA	NA	NA	-	8.29394	8.36567	8.45639	8.61805	8.97689	8.85542	8.75336	9.77042	9.10548	8.9182	8.54741	8.52516	9.4565	9.93134	9.67259	9.4866	10.0189	9.05077	9.57828	10.2208	8.63208	8.32232	7.44255	7.64829	7.44481	7.54807	9.00881	8.98525	7.53873	7.80833	8.00844
THC0290_N_1579	2766549	2766866	1	indep	NA	318	2	1	1	75	0	THC0290_N_1578	THC0290_2395;THC0290_N_1578	0	NA	NA	NA	-	12.2691	12.3076	12.4375	12.5227	12.6043	13.2524	12.7629	14.3785	13.2726	13.691	12.4989	12.3379	13.897	13.7017	13.1418	13.2646	13.8723	14.2292	13.9266	13.0769	12.2158	12.9116	11.8847	11.9172	11.9074	12.0326	12.4421	12.4477	12.1499	12.4719	12.3497
THC0290_N_1580	2767951	2768223	1	indep	NA	273	1	0	1	116	0	THC0290_2395	THC0290_2395	0	NA	NA	NA	-	5.44161	4.88522	5.47595	5.81109	5.74269	6.91341	6.6436	7.46776	7.95553	8.18389	5.80159	4.43628	8.82992	7.36449	7.07289	6.86287	6.96765	8.78626	8.69037	6.94358	5.29891	5.43434	4.52786	5.58798	5.28236	5.08892	5.17252	5.05578	4.31205	4.98035	5.03482
[truncated: 33 more columns]
