# Supplementary material for: Transcriptome architecture and regulation at environmental transitions in flavobacteria: the case of an important fish pathogen
Source: ISME Commun. 2021 Jul 7;1:33. doi: 10.1038/s43705-021-00029-9 (PMC9723704; doi:10.1038/s43705-021-00029-9)
Supplement: Supplementary file 8 — Table S7 [file 43705_2021_29_MOESM8_ESM.xlsx]

## Sheet: Legend
Table S7: List of the 5' regions (63 new TRs and 5 RFAM festures) predicted to adopt significant RNA structures using RNAfold software and putative regulatory mechanisms.
Column legend	Description
Locustag (5' region)	Locustag of the 5' transcribed region retrieved from the transcriptional map
Downstream_gene	Downstream gene name or locustag
Downstream_locustag	Locustag of downstream gene
Comments	Function of downstream gene; predicted regulatory mechanism if available.
Length	Length of the 5' transcribed region (nts)
Strand	(+) for positive, (-) for negative strand.
Start	Coordinates of the 5' transcribed region according to the F. psychrophilum THCO2-90 genome sequence (ENA accession numbe LT670843).
End	Coordinates of the 5' transcribed region according to the F. psychrophilum THCO2-90 genome sequence (ENA accession numbe LT670843).
MFEoptim	Minimum free energy of optimal secondary structure.
MFEoptimZscore	Z-score of the MFE optimal secondary structure (correct for difference in nucleotide compositions between sequences). Predicted structures were considered only if MFEoptimZscore < -2 (cutoff threshold).
MFEensemble	free energy of the thermodynamic ensemble (partition function)
MFEcentroid	Minimum free engergy of the centroid structure (the secondary structure with minimal base pair distance to all other secondary structures in the Boltzmann ensemble).
MFEfrequency	Frequency of the MFE structure in the ensemble.
sequence	Nucleotide sequence of the 5' transcribed region.
Opt2D	Minimum Free Energy structure representation in bracket notation.

## Sheet: 68_structured_5'TR
Locustag (5prime)	Downstream_gene	Downstream_locustag	Comments	Length	Strand	Start	End	MFEoptim	MFEoptimZscore	MFEensemble	MFEcentroid	MFEfrequency	sequence	Opt2D
THC0290_N_0324	ilvE	THC0290_0454	leader peptide attenuation element in ilvE mRNA (25aa; MRKFNIIPSIIIAIVIITTAKGML); branched aminoacid synthesis	437	-1	551791	552228	-109	-8.46663	-116.76	-104.6	3.37607e-06	AGAAATACAATGAGAAAATTTAATATTATTCCTTCAATTATTATTGCAATTGTGATTATCACAACTGCAAAAGGAATGCTATAAAAATATAAAAAAGAATATTTGAAAGCCTTCCGAGAAATCAGGAGGCTTTTTTTATTAGATTAAAACAAAAAACATGACAACAAATACAATTATTATTATCAGCATTATTATTCGCTCTTTCGAGTGAGTCAGGCTGGTTATTCCAATTTTAAGCCTTTCTCATTCACTTGAGAAAGGCTTTTTTTTATTTTACACAAATACTATGACAACAAATACAATTATTATTATTATTAGCATTATTATTCGCTCTTTCGAGTGAGTTAGGCTGGTATGTTCCAATTTTAAGCCTTTCTCATTCACTTGAGAAAGGCTTTT…	..(((((.((((((((((....(((.((((((((.........(((((.((((((...)))))).))))))))))))).)))..((((((........))))))((((((((((.((....)).))))))))))((((......)))).................................((((((......((((((((....))))))))...))))))............((((((((((((......))))))))))))................................................(((((((......((((((((....))))))))...))))))).............(((((((((((......))))))))))))))…
THC0290_N_1187	ftsY	THC0290_1752	5'UTR of ftsY mRNA, signal recognition particle receptor FtsY involved in protein translocation (RFAM = Flavo-1 in the opposite strand)	217	-1	2040499	2040716	-52.7	-6.47151	-56.32	-50.5	0.00279728	GTAAAAATTTTTTAGGAGCAAAACATTTTCGAATTTATTAAACCATTTTCCTGCTGTACGTTACAATCTTTATATGTCATACAGGTTCTAAAAACCTGTATGACATATAAAGGATTTTCACTTCCATCAGGGCTAAATACAAACTGTAGGCTTCTATTAAACATTAGGTTTTTAGTCTATACTCTAAAAATCTAACCACATAAAAAAAAACAAATAAA	.......(((..(((((((.............................(((((.((...((...(((((((((((((((((((((((.....))))))))))))))))))).))))...))...)).))))).....((((...)))).)))))))..)))..((((((((((((........)))))))))))).......................
THC0290_N_0568	alaS	THC0290_0772	5'UTR of alaS mRNA, alanine-tRNA ligase (RFAM Flavo-1 in the opposite strand)	302	1	917638	917940	-77.8	-6.34995	-83.78	-66	6.11132e-05	GTTATCACAAAGTAACAAAATATTAGACGAACTAATGTAGAAAATGTTTCAATTATTAAACATCTTTTTTATTATGAGTGCCTAATCCAGCTATTCGTTGCAAGTTCTCGTTTAGAAAGCTTTTTTTCTACGAGCCAGCAGGAGCTTCCTTTGGTCGCTCTGCCAGCTCAAGAAAAAATAGCTTTCTAAATCTCGAAGCTTTCCACTACTATCTGGGGCAAAAAAGGTTATTCGTTAATTTGGTTATTCGTTTATTCGAATCCCAAATAAACAAATAACCGAATAACCGATTAAACATAAAAA	(((((......)))))...(((((((.....)))))))((((.((((((........)))))).))))...(((((..((((....((((.((...((...(((((.((((((((((((((((((((((..((((..((((.(((..((...))..)))))))..)))).)))))))).)))))))))))...))))))))...))...)).)))))))).....(((((((.(((.((((((..(((((......))))).)))))).))).)))))))...............)))))...
THC0290_N_0727		THC0290_1020	5' of THC0290_1020 mRNA containing a putative leader peptide (16 aa; MTNWNDEKLNENDNV); putative OMP beta-barrel protein of unknown function	339	1	1201077	1201416	-99.6	-6.00365	-105.06	-82.4	0.000141925	AACTTCAACAGTTAATGTTCTGGAGTTGAATGTGGCTTTAGATGAATTAAAATAGGGGTTCGATCTTTTGTCATTTCGACCTTTTGGGAGAAATCACATAATCTAGATCAACGTGATGTGATTTCTCCTTCGTCGAAATGACAAATTGGAATGATGAGAAACTGAATGAAAATGATAATGTCTAACAGGTTTTGGAAACCTTGAAGGATAACAAAAGCCCTTGTTACCCCAAGTTCCCTAGCCCAGATAGTAGTGGAAATCCTTTTGTGTTCGCTTTTTTTGCGAACACAAAAGATTGAAGCGAATAGCTGGAAATAGCTCCTTAAAATAAACAATAAAA	...........(((((..(((((((((......)))))))))...)))))...(((((((((.(((((((((((((((((.....((((((((((((((................))))))))))))))..))))))))))))))..))).))).......(((...((..((....)).))...)))(((..((((..((((..((.((((((......)))))))).))))))))..)))((((.((...((...((((.((((((((((((.......))))))))))))))))...))...)).)))).....)))))).................
THC0290_N_0005		THC0290_tRNA_0001	5' of tRNA	91	-1	4330	4421	-21.4	-5.65752	-23.15	-20.4	0.0586496	AATTAATTAGCAATTGATAATTAATAGTTGATATTTTTTAAAAAATACTAATTATCAATTGCTAATTATTAATAGTTTCTTATATTTGCAAT	...((((((((((((((((((((....((((......)))).......))))))))))))))))))))........................
THC0290_N_0398		THC0290_0551	5' region with putative CDS (not considered as 5' TR per se)	880	-1	673140	674020	-212.1	-5.35175	-227.82	-178.3	8.30492e-12	CAAACTGCTTTTAGCAACGAAACGATGGAAGTCATCCTTCGTCGACTTCCATCAGGCTCGGCTACGCCGACGATGTAAGCCGTCCTCACGGACGCCTCACATCTTTAGCTTTGACGGATTCAGCCACGGAGTAAAAACTCCTCGCTGAACCTCGACAAAGCCGAGCCTGTTATGCCTCAGTTTAAAGAACCTAACTGCTAAAAAAAACGAAATATGGAAGAATTAGAACAAAAGTTAAAATTGACATTTGAAAAACATAAAAAAGGATATGCTTCAATATGCGAGCCAATATCTGGACTAATTTCAAGACAAAATAACGCTCTTAAGTTTGGTGCTGTAAACGAAAAATATGTAGATGAAATATTGGAAATATTAAATACCCATATAGAAAATAAATCT…	.....((((...))))(((....((((((((((..........))))))))))((((((((((..((.((.(((((.((.(((((....))))).)).))))).)).)).((((.((.((((((...(((((....)))))..))))))))))))...))))))))))((((((((((((((..........))))).................(((((((((.(((((((((.....(((((....(((((((......(((((((...((........))...((((((((((......((((...(((..((...(((....)))...))..)))....))))......)))).....))))))...(((((...((((((..((((((.......…
THC0290_N_0343		THC0290_0472	5'UTR of THC0290_0472 mRNA, ribosome maturation factor RimP	58	1	568633	568691	-16.2	-5.25475	-17.27	-15.7	0.175785	TTATTAAGTATTTATATCTAAATAATGAGGGAAGCATTGCTTCCCTCTTTTTATAAAAC	........((((((....))))))..(((((((((...)))))))))............
THC0290_N_0076		THC0290_0102	5'UTR of THC0290_0102 mRNA, unknown function	152	1	131417	131569	-30	-5.07056	-31.21	-30	0.140077	TATATACAATACCTTTTAGGAGCTATGCTTGTTTTTTAATAAAAAAAAACAAGCATTTCTTAAAAAAAAAATAGTATTGGGGGTGGAGTTCAGAAACCACAACAAAAACGAGGAGCAACTGAAAATCCAAAAGAGTAAGAAAAAAATAGAAAA	......((((((.(((((((((..(((((((((((((......))))))))))))))))))))))........))))))....((((.(((((...((.............)).....)))))..))))........................
THC0290_N_0824	hisG	THC0290_1278	leader peptide attenuation element of hisG operon (19-aa His-rich leader peptide; aaseq=MSLNQLHHHHFHICSQAKC)	129	-1	1476596	1476724	-30.8	-4.45009	-31.71	-30.8	0.22708	TATAAAAAAACAAAAATGTCTCTAAATCAATTACATCATCATCATTTTCATATTTGCTCTCAGGCGAAGTGTTAATGGTATGCGTGTAAATCACAATATTCTAAAACCCGTTTGAGTACATCAAACGGG	..............................(((((((((.((((((..(((.((((((....)))))))))..))))))))).)))))).................(((((((((.....)))))))))
THC0290_N_1154		THC0290_1712	5'UTR of THC0290_1712 mRNA, putative monofunctional lysine-ketoglutarate reductase, lysine biosynthesis	49	1	1987994	1988043	-4.9	-4.44696	-5.45	-4.9	0.412596	AAATTTTAAAATAATTAACACTAATTATTCTGAAAATAAAAAAAATTACA	...(((((.((((((((....)))))))).)))))...............
THC0290_N_0210	metK	THC0290_0287	SAM-II long loop riboswitch, SAM biosynthesis	129	-1	344988	345117	-23.6	-3.94788	-25.51	-22.9	0.0451051	CGAAAATCGAGAGGAAAAATTTGAACTGATTGCAACCTCGTTAAAAAAATGCTAAAGCAGAAATTCTTCTTTATCATTCCCTTGCAATCACATTTTTTTCTTCACTAAATTAATTTTAAATAATTATATT	..........(((((((((..((...(((((((((............((((.(((((.(((...))).))))).))))...)))))))))))..)))))))))...........................
THC0290_N_0406		THC0290_0564	5'UTR of THC0290_0564 mRNA, Hypothetical protein	101	-1	687576	687677	-23.4	-3.64157	-25.7	-18.9	0.0238316	AAATAATCGGTTACGATTTTCGCAACCTCGCCAAGCGGCAAAACGTTGTGCGTCAGGTTGCTAGAACCGAAATGTAAACCAAAGATAAAGATATAAAATAAA	......((((((.........((((((((((..((((......))))..)))..)))))))...))))))................................
THC0290_N_0902		THC0290_1413	5'UTR of THC0290_1413, uncharacterized nucleoid associated protein	172	1	1635372	1635544	-27.2	-3.27355	-29.91	-24.2	0.0122577	AAATTAAAAACACAATTTGACTCTTTCTAACTAATACCAAGTATTTAAAAAAAAAATACGGTTACCACAAATTCCTATTTATGGGTCTTTAAAAAATTTGTACTAATGTGTATAATTCGTGGTTTAAACACAACTTGGTAAAAGTTATATATAGTCATAAAACACAATTAAAC	.................(((((.....(((((..((((((((......................(((.((((....)))).))).............((((((......))))))...(((.......))).))))))))..))))).....)))))................
THC0290_N_0920		THC0290_1435	5'UTR of THC0290_1435 mRNA, protein of unknown function (RFAM = Flavo-1)	130	1	1668192	1668322	-31.1	-3.24527	-33.63	-13.8	0.016479	CTGTTTTTTACAAAAATATAAATTGAACACGGGTGCCCTAGCCCTGATTGTAGCGATATCCTTTTTCTTGCTCCTTTAGCAAGGAAAAGATATAGCGAAAAGCAGGAAATAGCTCCTAAAAAAATAATAAA	(((((((((.................(((((((.((....))))))..))).((.(((((.(((((((((((.....)))))))))))))))).)))))))))))..........................
THC0290_N_0481		THC0290_0663	5'UTR of THC0290_0663 mRNA, conserved protein of unknown function, YqeY family (tRNA aminoacid amidase domain)	214	1	800558	800772	-40.8	-3.24493	-44	-40.8	0.0055868	GCCAATTCCTGCTGTACATTACAAGCTTTTTTCGCAAAATGCTTTTTTCTACAAACCAGAAAGAGCTTCCTTTGGTCGCTTTTCTGCTTCAAGAAAAAATACATTTTCTCTCAAAAGGCTTTCCATTGCCATCAGGGGCAAAAAATAAGATATAAGATTTCATTTTTTTTGAAATCCCATCTGCCATCTAAAATCTGTCATCTAAAATCAAAAAA	(((....((((.((........(((((((((....((((((.((((((((......(((((.((((..((...))..))))))))).....))))))))..)))))).....)))))))))........)).)))))))........((((....(((((((.......)))))))..)))).................................
THC0290_N_1128		THC0290_1676	5'UTR of THC0290_1676 mRNA, protein of unknown function	54	-1	1945356	1945410	-9.2	-3.11011	-9.94	-6.8	0.302867	AAAATTAAATCAGCTCACATCAATAACGATGTGAAACTCGACAAATAATGTTTAA	..............(((((((......))))))).....((((.....))))...
THC0290_N_1300		THC0290_1932	5'UTR of THC0290_1932 mRNA, protein of unknown function containing a C-terminal secretion signal, putative adhesin (RFAM = Flavo-1)	228	-1	2252602	2252830	-49.7	-3.10399	-52.78	-49	0.00673298	GAATTTATGCTTAATTTTAAAATAAACAGATTTTTTAAATCTCATTACTTTGGCGTTACACAAGGGTCTAGTTTTACCTTGCAACCTTTTTGAGGAAGAAAAAGCCTCAAAAAAGACTTTCGCTTCACTCGAGGCTGAAAGAGCGAACTGGCGAAGCAACCCCTAAAGAAAACGCTGTAATTTATAAAATTAAGTCAGAATTTACATGTTGAAATTATAAAATAAATTT	((((((..(((((((((((........((((((...)))))).(((((...((((((.....((((....(((((.((((((....(((((((((.........)))))))))...((((((((((....))))).))))).))))...)).)))))...))))......)))))))))))...)))))))))))..))))))..........................
THC0290_N_0116		THC0290_tRNA_0003	5' of tRNA	45	1	191386	191431	-10.4	-3.06973	-10.84	-10.4	0.490489	GCACTCACGGAATTAAAATTTATGTTTTAATTTTGACTGCTAATAA	(((.(((..((((((((((....))))))))))))).)))......
THC0290_N_1451	recX	THC0290_2200	5'UTR of recX mRNA, regulation of DNA repair	123	-1	2546978	2547101	-22.9	-3.03844	-24.9	-21.3	0.0388733	TTTTTATCGTTTGTTTATTTTTTTGATAATCATCTGATGGCTTACTAAAGCCATCAAACGGTGCCAAAAATAGTAACAATCTTTTTATTTTTATTTAGAAATAGATTACCAAATCATTAATTTT	..........(((((....((((((...(((...(((((((((....)))))))))...)))..))))))....)))))....(((((((((....)))))))))...................
THC0290_N_0452		THC0290_0623	5'UTR of THC0290_0623 mRNA; conserved uncharacterized protein (possible involvement in nucleotide degradation)	227	-1	759692	759919	-44.3	-3.03578	-48.14	-43.6	0.00196121	AGATTATTTTATTTTACTACCCCAGTGGGTATAATAAATAAAATTTTAAATTTTCTAAAAAAACACATAGAAACAGAGTTGAATAGACCAATTCTATTTGCTAACACTCGGGTCTTGGTTCGCAAAGCTACGATTTACTATAATAAGGTGAAACGTCGCTACAAAAATCCGAAAAACTTAGTATCTATGTGGTAAGAAAAACGAATTACATCTAACAGATATTTTATT	.....(((((((((...(((((....)))))....)))))))))......((((((.......((((((((.((.((((((((((((.....)))))))........((((((.((.((......(((.(((.((((((.......)))))).))).))))).)).))))))..))))).)).))))))))...))))))............................
THC0290_N_0458	clpP	THC0290_0630	5'UTR of clpP-clpX mRNA, ATP-dependent Clp protease subunits	214	1	765050	765264	-44.2	-3.0242	-49.43	-41.2	0.000207685	GTCAGAAATTTATTTTTGGCGTTTTTTTATTTGAAGCCAATCCAGCTATTCGTTTCAAGTTTTTTTGTCTAGTTGTTTTTTTCTAAGCAAAAAAAGGAGCTTCCTCTGGTCGCTCTTTTCCTGCAAGAAAAAATACAACCAGCCCGCAAAAAGCTTTTCACTACTATCTGGGCTAACTAATAATTGATAATTAATAATTTATAATTAATTTTAAG	((((((((....))))))))........(((((((((.(((......))).)))))))))..((((((((.(((((((((((((..(((...((((((((..((...))..))))))))..))).)))))))).))))).))...))))))(((((.............))))).........((((.(((((((........))))))))))).
THC0290_N_0420		THC0290_0578	5'UTR of THC0290_0578 mRNA, DNA methyltransferase	162	-1	704419	704581	-42	-3.02125	-44.47	-40.8	0.0183159	AAAAAAAACTGACTCTGGTCAGACCAATCTACCCCTTTTAGGGTCGCTTTGTCTGATTTTGTCAGACCTATACAATAGTTGGCATCAAGGCTAACGGAACCTGCTAAATAAGAGCTATTTAGAATGAAAATTCCGTTGAATTGTTGCCGTAAATCGGACAACA	........(((((...((((((((......((((......))))......))))))))..)))))............((((((......))))))((((....(((((((.....)))))))........)))).......((((((((.....))).)))))
THC0290_N_0195	pheA	THC0290_0257	leader peptide attenuation element of pheA-aspC3 mRNA (27aa, MNTNNTFYSNNSFYFYWNIGRDCYMVI); phenylalanine biosynthesis	170	-1	313769	313939	-34.4	-3.00699	-38.55	-21.3	0.00119793	CAAATCGCTCAAAAAAAGCAATGAACACAAATAATACATTTTATAGCAACAATTCTTTTTATTTCTATTGGAACATAGGAAGGGATTGTTATATGGTTATTTGATTAGAAAATTAAATTAAAAATATAATATACAATCCCGTCTTTTAGGCGGGATTTTTTTTTGCTCATT	................(((((.(((..((((((((.((...((((((((...((((((((((((((...)))).)))))))))).))))))))))))))))))...............................((((((((((...)))))))))).))).)))))....
THC0290_N_1101		THC0290_1644	5'UTR of THC0290_1644 mRNA, putative polyphosphate kinase (RFAM = Flavo-1)	114	-1	1908150	1908264	-22.1	-3.00212	-23.57	-20	0.0919549	AGTTTAGCCCAGATGGCAGTGGAAATCCTTTTCTTTTTTTTCTTTAAAAAAAGAAAAGATTGTAACGTACAGCTGGAAATAGCTCCTAAAAAAAAACAAATATAAAACAAAGAAT	((((....((((.((...((...((((.((((((((((((.....))))))))))))))))...))...)).))))....))))...............................
THC0290_N_0294		THC0290_0403	5'UTR of THC0290_0403 mRNA, unknown function	51	-1	494437	494488	-6.3	-2.91021	-6.53	-6.3	0.688559	GTAAAAAAAAAAGATTTTTGAAGTTTAAATACAAAAATCTAAAATCTGAAAT	...........(((((((((...........)))))))))............
THC0290_N_0422	gpmI	THC0290_0580	5'UTR of gpmI mRNA, phosphoglycerate mutase, glycolyse/gluconeogenese (RFAM = Flavo-1)	85	-1	707542	707627	-20.8	-2.87598	-22.42	-20.5	0.0721545	ATTTCCTGCTGTACGCTATATCTTTTCCTTGCTAAAGGAGCAAGAAAAAGGATGCCGCTACCATCAGGGCTAAAAACCCGTAAAAA	...(((((..(((.((..((((((((.((((((.....))))))..))))))))..)))))...))))).................
THC0290_N_0796		THC0290_1214	5'UTR of THC0290_1214 mRNA, probable CRISPR-associated (Cas) protein, csn1 family	43	-1	1402477	1402520	-3.7	-2.84702	-3.96	-3.7	0.651144	AATAAATCTAGACAACTAGAATAATTAAAATATAAGCAAGTACA	......(((((....)))))........................
THC0290_N_1417		THC0290_rRNA_0018	5’ region of 30S pre-rRNA	438	-1	2483267	2483705	-61.9	-2.81874	-67.89	-55.6	6.02404e-05	CCGCATTGGCACACAGTTCTTATTACATATTAAAAACGAATCGAAAAAAAAATAAAACAAAAATTTTATTAAAAAGATTAGGAAAATAGCAAAAAGAAACTACCTTTGCACCCCGCAAGAGATTAAGTTCATTGACAAATTGGTTAAGAAAAAGAAAAGCAAACGAGAATAAATATTTTCAAAAAAACTTATCAAAAAACTTGCCAGTTAAAAAATAACCACTACTTTTGCACCCGCTTCGAGAAACAGATAAAGACACAAACGAGGCTAAAAAAAAGCAAGACAAGTTCCTAGACATATTGAATTGACAGCCGTTTTAAATAGCGATATTTAAAACAAAAGAATAAAGAGTAAGAGCGAATCGTAAGATTTGAAATAAAGCTATAACATCAAAAAACA…	...(((((((...((((((...............................(((((((......)))))))........((((((....(((((...........))))).....(((((((.....(((.(((....(((((((.(((.....((.(((.....((((((....)))))).......))).))......))))))))))....)))))).....)))))))....((((((.....................))))))...................))))))........))))))...)))((((((((((....))))))))))............(((.....((((((....)))))).......)))................…
THC0290_miscRNA_0048		THC0290_1776	Cobalamin riboswitch, putative TonB-dependent receptor (RFAM)	265	-1	2060184	2060448	-57.5	-2.81353	-61.45	-48.4	0.00164084	TATTTACACCCAAATTAAGGTTTCTTTTTGTTTTGTAAAAAAAAGGAATTAAAAGGGAATTTGGATAAATACCAAAGCTGTTCCCGCAACTGTAAGCTAGAAAGCTTGTTGTTATCTGCAAAGTCACTGTTTAAAATTCTAGAATTTAGAATTTAGATTTCATTTTTTTTAAGCTGAAATCGAAAATCCTAAATTAAAGATTAAGAATGGGAAGGCAAACAACAAGACGCAAGCCAGGAGACCTGCCTTAATTCTTAACAAATAT	............(((((((((((((((((..........)))))))))......((((((((((.......))))....))))))..........(((......(((((((((...(((....((.((((((.....(((..(((((((.((((.(((((((.(((....))).)))))))..)))).)))))))..)))....))))))))..)))))))))))).....)))((((...))))))))))))............
THC0290_N_0926		THC0290_1437	5'UTR of THC0290_1437 mRNA, probable transcriptional regulator, AsnC family	60	-1	1670248	1670308	-9.9	-2.80822	-10.71	-9.9	0.268602	TTGTCTTGTATTTACAAGATAAATACAAGAATACAAGAATATATAATATAAATAATTAGTT	...(((((((((((.....)))))))))))...............................
THC0290_N_0251		THC0290_0345	5'UTR of THC0290_0345 mRNA, unknown function	185	-1	423834	424019	-35.8	-2.74098	-39.83	-30.1	0.00143734	ATATACCTGCTATCCGCAGTATCTTGTCAAAAAAACTGCTCGTGCCTCGCAATGACAAGGATACTTGCTGCTATCAGGGCTAAATAGGAAATTGTATTGCCTTTTTGGAATCTATCCGAAAATCCAATTCATATCAAAAAAATATAGATTTTATAATTTCTAAAATCTAAAATCTAAGATCTAAAG	.....((((.((...((((((((((((((........((....)).......)))))).))))).)))...)).))))..............((.((((..((((((((.....))))))))..)))).)).............(((((((((.......))))))))).................
THC0290_N_0722	valS	THC0290_1010	5'UTR of valS mRNA, valine-tRNA ligase (RFAM Flavo-1 in the opposite strand)	218	-1	1191365	1191583	-33.5	-2.73939	-36.11	-27.7	0.0145432	TTGCATACAAAAAGTGTACCCAAAAAAAAATTCCTATTTTTAGGAGCAGAACAGTCACTTTTCAAAACAACATTATTCCTGCTGTACGTTACAATCTTGCCAAAAAAGGCAAGGATTTCCACTTCCATCAGGGCTAAAATTCAAATTAGTCGTTCATAACAACCAAATCAACAAATAACCAACCCAAGCGAAAGCAAACGGATGAAATAATCAACGAAT	.........(((((((.((...........((((((....)))))).......)))))))))..........((((((.((((...((((.....((((((......))))))(((((.............((((((........)))))).............))))).................))))..))))...))))))..............
THC0290_N_0369		THC0290_0510	5'UTR of THC0290_0510 mRNA, probable modification methyltransferase	118	1	617835	617953	-17.6	-2.72847	-19.05	-15.2	0.094417	TAGTAAAAACAGAAAATAAAATACCTGCACAAATTATAAAATCTAAAAAATAAAGTTGGTCTCATTTAACAAAGAGTTAGGTAGATAACTTTGTTTTTAAATACTATTTTTAAACAATA	(((((....(((............)))..................(((((((((((((.(((.(((((((.....)))))))))))))))))))))))...))))).............
THC0290_N_1220		THC0290_1827	5'UTR of THC0290_1827 mRNA, lipoprotein of unknown function	109	-1	2117337	2117446	-20.6	-2.71405	-22.14	-20.6	0.0824565	AACAGTCAAAATAAATACCAAAATTTGTTGAAATGACAAATTGACTGAATTATTGTAGTTTTTGTTAAAAAAACTATAAAATTGGCACGGTAGTTGTATATTAGGCAAAC	..((((((..............(((((((.....)))))))))))))((((.(((((((((((.....))))))))))))))).((..((((......))))..))....
THC0290_N_1254		THC0290_1868	5'UTR of THC0290_1868 mRNA, RNA polymerase ECF-type sigma factor	80	-1	2168680	2168760	-7.2	-2.70953	-8.79	-5.5	0.076249	ACTAAAACAAGGCTTATACTAAAAAAATACTTTAGAAAAAGAGACAAACTCTTAATACAAACCCACTCTAAAAGTATTCTT	.........................(((((((((((..(((((.....))))).............))).))))))))...
THC0290_N_0185		THC0290_tRNA_0005	5' of tRNA	59	-1	297877	297936	-8.4	-2.66057	-8.97	-8.4	0.395098	ATATTGCAATCTCAAATAAGTCTTATGTGTTATTCATAAGCACAAGACAAAACAAAAACA	...................((((..((((((.......))))))))))............
THC0290_N_1165	proS	THC0290_1719	5'UTR of proS mRNA, proline-tRNA ligase	48	-1	2005078	2005126	-9.6	-2.60016	-10.15	-9.6	0.409128	CTATTTTATTTTTTAACATAGGCACAAGATTTGTGCCAAACTATACAAG	....................(((((((...)))))))............
THC0290_N_0127	kbl	THC0290_0162	5'UTR of kbl mRNA, glycine C-acetyltransferase (threonine degradation pathway)	59	-1	203890	203949	-5.9	-2.58491	-6.76	-5.7	0.249452	AAAATTGTCAAAAGGCGAAAGTTTTTCAAAACCTTAAACTTTAAACTTTAAACCAAAAAA	......((..((((...(((((((...........)))))))...))))..)).......
THC0290_N_0362		THC0290_0501	5'UTR of bicistronic mRNA (THC0290_0501, hypothetical lipoprotein; THC0290_0500, Probable S8 and S53 subtilisin family serine endopeptidase)	252	-1	608106	608358	-63.2	-2.50365	-67.67	-51.45	0.000705599	AGTTGTGCAACAGGCACAGCGGTTTGGCGTGATTGGGGTTTTAGGCTGAATTGAAAGATGGTTTTGTACTTGGAACATTCGTGTTTAACCGAAAGATTACGCATCTTTATTCCCCAACCACGCCAAGCGCCAGGACGTTGCAAGATACCTTTTAGCTACATGAAGTGCCTAAGAGAAAATCTTAAAAACGGATTGCCTATGGGAAAACAAAAGAAAAAGTAAACTAATTTTTAACTATTTAAAAAATTCAAAT	.(((((((.....))))))).((((((((((.((((((.....((.(((((.....((..((((((....))))))..))..))))).)).((((((.....))))))...)))))).))))))))))..(((..((((..(((((..(((((((.(((.....))).)))))))...)))))...))))..)))................................(((((((....)))))))........
THC0290_N_1558		THC0290_2369	5'UTR of THC0290_2369 mRNA, protein of unknown function	81	-1	2741568	2741649	-18.5	-2.44948	-19.62	-11.6	0.16139	GTTTGTGGGGTTTTTTCACAGACTGTCGTTGTGGGGCATTTTACCGCACCGCACAAAAAAAAAAGAATTAATACAACAAAAA	(((((((((.....)))))))))(((((.(((((.........))))).)).)))...........................
THC0290_N_0904	ltaE	THC0290_1414	5'UTR of ltaE mRNA, threonine aldolase involved in threonine catabolism (RFAM = Flavo-1)	142	-1	1637059	1637201	-34.4	-2.43485	-37.86	-34.1	0.00364325	ATAATAATGCTTCTTTTCTAGCCCCGATAGTAGTGAAAATCCTTTTTCTGGCTCCTTTAGCCAGGAAAAGATTGTAACGGATAGCGGGAATAGCTCCTAAAGAGGATTGATTGATTTGTAAAAATAAGAATTTTATCCGAAAT	.........(((((((...(((((((.((...((...((((.(((((((((((.....)))))))))))))))...))...)).))))....)))...)))))))...(((.(((((..........)))))..)))......
THC0290_N_0348		THC0290_0475	5'UTR of THC0290_0475, transposase	102	-1	580527	580629	-15.4	-2.42124	-17.36	-15.4	0.0419102	CTATATTTGAAAAAAGGGTTCAACTTTAATTAAAAAGTCAAACCCCTATATTTTTAAACTTACACACTTTTTAGGATAGTGTCGCAAAACCAAGCAACTCAAT	.....((((((((..(((((..(((((......)))))..))))).....)))))))).....(((((.........))))).((........))........
THC0290_N_0094		THC0290_0133	5'UTR of THC0290_0133 mRNA, unknown function	78	-1	164134	164212	-12	-2.38384	-13.3	-10.3	0.121653	AAGAAAGATTTTGTTTTTAGAATAAATCTAACCCAAGCGTTAGAGAACAGGCGAAGCAAATCTAAAATCTAAAATTAAA	.....((((((.(((((.........((((((......))))))........)))))))))))................
THC0290_N_0501	hisS	THC0290_0693	5'UTR of hisS mRNA, histidine-tRNA ligase (RFAM Flavo-1 in the opposite strand)	72	1	828254	828326	-4.1	-2.32143	-5.5	-2.7	0.102861	ATCGAATAACCAAATAATCGAATAACCAAATAATCGAATAACCAAATAATCGAATAACCCGAATACACAAAAA	.((((............((((.((......)).))))............))))....................
THC0290_N_0817	acsA	THC0290_1260	5'UTR of acsA mRNA, acetate-CoA ligase	270	1	1457741	1458011	-44.2	-2.26475	-49.18	-40	0.000308792	TACTTATTAACTAACGATAGTATAGGCTACTCTAGCCAAACATATTTATGAAGGTTATGGAGATACAATTGCCATAATTTACGATTCGTGTTGTTACACAAATAATAAGAAAATGCTTTTAGTACAGTACCTAAAACAGTTAGGCGCAACTGGAAATCCTAAATATATAGTAAAACATTGATAATTAAAATATTATTGATGAGATTACAAGTATTAAAAAAAAAACAGGCATTTATAATAAAATAAGAATTAATAAAATTTAAGAATATTT	..(((((((((((....))))...(((((...)))))..............(((((((((.(((...))).))))))))).......((((....))))...))))))).(((((((((((((((.((.(((((.....))))).))....((....))..........((((..((((((((((......))))))))))...))))..)))))))).........))))))).....................................
THC0290_N_1382		THC0290_2099	5'UTR of THC0290_2099 mRNA, probable outer membrane protein precursor (RFAM = Flavo-1)	202	1	2417284	2417486	-52.8	-2.25689	-55.22	-50.8	0.0195622	AAAGTGTGAAGGATTTTTTATTTTAAGTTACTATTGAACTTTGAATAACTATTTTTGATTGCTGGCACATGCCCCTGCGTGAGGGATTGAAGTGAAAATCCTTTTTTGAGGCTTTTCGCCGATGAAAAAGATTGTAACGGAAAGCCCGACCCGAGGAGGAACGACGAAGGGGCACGCCCTAAAAAAACTAAACTATTATAATT	..(((((.((((((...((((((.(((((.......))))).))))))..)))))).)).)))(((...(((((((.(((((((((((........)))))))).(((.(((((((((.((((.......))))...)))))))))))).((.....))....))).))))))).))).........................
THC0290_N_0761		THC0290_1094	5'UTR of THC0290_1094 mRNA, putative precursor of unknown function	69	1	1274218	1274287	-11.8	-2.25262	-13.11	-10.4	0.11847	AAGCCCAAAAATAAAGATTTTTTATCAAATCTAAAGGTTTAGGGCTGTTTACCTTTGCAAAAAACTATTA	.((((((((.....((((((......)))))).....))).)))))........................
THC0290_N_1006		THC0290_1536	5'UTR of THC0290_1536 mRNA, probable transcriptional regulator	131	1	1791356	1791487	-18.2	-2.2515	-21.48	-9.2	0.00486772	TGGTTTTGAAAATCTTTTTAATATGTAAAAACAGGTTAACAGATTGAGAGATACTCACAAAAAAATATAGTGTATTAATACCACATAAATAATAATACACTAGATGATGCAGTCTTGTAAAAAAGAAAACAA	..(((((...(((((..(((((.(((....))).))))).)))))..)))))...............((((((((((...............)))))))))).....((...((((......))))...)).
THC0290_N_1499	greA	THC0290_2292	5'UTR of greA mRNA, transcription elongation factor	105	1	2647825	2647930	-19	-2.23698	-21.41	-18.9	0.0199029	GTATGATTGTCATATAAAATTATAAACTGAAATAAAAAATAATATCTTTGTAGAAAGAAATCCCGTTGCGATGGGATTTTTTCTATTTATATATAACGAATAAATT	((((((...))))))..........................((((....((((((((((.((((((....))))))))))))))))....))))............
THC0290_N_1339		THC0290_1975	5'UTR of THC0290_1975 mRNA, putative cell wall-associated hydrolase	236	-1	2304591	2304827	-43.1	-2.233	-48.7	-31.3	0.000112397	GATATTGTTTGTTTTGCGACTTCAAGATACTGAATTTCAGTATCTTGAGCAATATCTAATCAATATTTTTTATTTAAATAATTACACCCAACGGGTTTTGTATAACTCTTTTTTATGATTTTTCGATAGTTAATTGTAAAGACTTTTTTATGTTAAAAAAAGCATTATTCTTTTTATCTATTAACTTTTAAAGGTTAATTTAGCGTTTTCCATTTTCGGAAGAAAAAAAAGCATATC	(((((.((((...((((....((((((((((((...))))))))))))))))...........(((((.......)))))............(((((......))))).......((((((((.((.(((((((.(((((((.......(((((......))))).....)))))))..))))))).))))))))))........((((((......)))))).....)))))))))
THC0290_N_0066		THC0290_tRNA_0002	5' of tRNA	146	-1	109131	109277	-24.4	-2.21921	-26.77	-22.9	0.0215411	AAAAGTGATAATTTTATTTGGATATAATAAAAATGGTGCTATCTTTGCACCGCCTTACAAGTGAAACAAAACACACTTACTCTTAGGTTTAACAAGAGTACAAGGCTAAAAAAGTTCATACAACAATAAAGTTCATAACATACAGTT	....((((..(((((((((((((...........(((((.......)))))(((((....(((........)))...(((((((.........))))))).))))).......)))))......))))))))))))...........
THC0290_N_0011	gidA	THC0290_0013	5'UTR gidA (tRNA uridine 5-carboxymethylaminomethyl modification enzyme)	177	1	14969	15146	-35	-2.18503	-38.6	-33.1	0.00290863	TTTTTTGTATTTTTTATAAGTAAGTTCCACGTGGAACAAATTAAATACGAGTTGTAAATTTTGTTCTGTGTAAATGATTTTTTAATAGTTAATTAAAAAGTTTCACGTGGAACAAAATGTAATAAGATTAGAGTTGCGTTGTAGTTCGTGGTTTTTAATTTTTAATTTATAAGTGAAT	............(((((((((..(((((((((((((((((.....(((.....)))...))))))).........(((((((((((.....))))))))))).))))))))))..........((((((((((.((((........))))..))))))))))..))))))))).....
THC0290_N_1334		THC0290_1968	5'UTR of THC0290_1968 mRNA, protein of unknown function with putative peptidoglycan-binding domain LysM	58	-1	2296507	2296565	-10.6	-2.14998	-11.19	-10.6	0.385741	TGCGTTGTAGAAATTTTCTAATTTTGATGGTTTTATCTAGTTAGAAAGAAAAACAATTT	...(((((.....((((((((((..((((....)))).))))))))))....)))))..
THC0290_N_1237	dnaN	THC0290_1850	5'UTR of dnaN mRNA, DNA polymerase III beta subunit	49	1	2148972	2149021	-4.5	-2.1496	-5.16	-1.7	0.343219	AAAAATAATAAGTTCTGGAATTCAAAACAGAAGAATTTAAAACAAAGACG	........((((((((...............))))))))...........
THC0290_N_0774	fumC	THC0290_1103	5'UTR of fumC mRNA, fumarate hydratase involved in central carbon pathways and anaerobic respiration	172	-1	1290924	1291096	-24.9	-2.13142	-28.13	-17.5	0.00529652	GTTTTTTAGGAGCTATTTCCTGCTATCCGTTTCAAACGAAGTTCACTGAACCCCAATTGAAATAAACGTTAGTGAAATATTTTTTTTGGCGAAAAGCCTCAAAAAAAAATTTCCTCTACCATCTGGCTAAAAACCCAATAAACACATAACCAAATTAACAAAATTAACAAAAA	(((..((.(((((........)))....(((((((.....((((...)))).....)))))))......(((.(((((.(((((((.(((.....)))..))))))).)))))..))).....(((........)))............)).))..)))..............
THC0290_N_1047	fdx1	THC0290_1572	5'UTR of fdx1, ferredoxin	57	-1	1830589	1830646	-6.1	-2.12809	-6.95	-3.4	0.252752	AAAATAAGAATTTCATTTTTTATAAATCTGAAATCTGAAATCTAAATTCTAAAATAAA	......(((.(((((..(((((......)))))..))))))))...............
THC0290_N_0031	fjo17	THC0290_0032	5'UTR of fjo17 mRNA, unknown function	68	1	51080	51148	-8.2	-2.11759	-9.53	-5.9	0.115721	TCTTTGTTATCTTTACAAATTAATCATTTTATGAATTTAAGTTGCTTTTTGCAACACTATATATAAATT	..(((((.......)))))........((((((.((....(((((.....)))))...)).))))))..
THC0290_N_1012		THC0290_1541	5'UTR of THC0290_1541 mRNA, probable transmembrane protein of unknown function	61	-1	1796506	1796567	-6.3	-2.10425	-7.11	-4.5	0.268974	GAAATTAATAGCTAAAAGAAAGTACTGTTGTTTTCGTTGTTAAATAAAAAAAAATAAAAATT	....((((((((.((((.((.......)).)))).))))))))...................
THC0290_N_0562		THC0290_0762	5UTR of THC0290_0762 mRNA, unknown function	191	-1	908817	909008	-28.6	-2.08972	-31.26	-25.1	0.0133444	ACTTAATTTTTTTTTATGAAAAAAACATTTTATACCCTTTGTGCTTTAAGCTTACTTCTTATTTCTTGCTCTAAAGACGATACAACAGTAGCTACAGCTCCTGAAAATACCACAACCAATATTTTACCTAAAAAAATTATTGAAGAAGGAGTTACTGGCATTCTAACCTATGATGGCAACAAACTTCTTACA	...((((((((((.(((((((......)))))))....((((.((((((((................))).))))))))).....(((.(((....))).)))((((((..........))))))....))))))))))......((((((((....((..((........))..))....))))))))...
THC0290_N_0014		THC0290_0016	5'UTR of THC0290_0016 mRNA, probable helicase	128	1	18906	19034	-21.2	-2.0863	-24.3	-21.2	0.00657647	TTTTTTTGTTTCGCAAGGTTTCTCGAAGAAAATTAAAAGACTTTGTGCATCTCTGTGAAACCTTTGTGAAACTTCATGAAACAATTTAAAATAAATTCAATATTTTTGTCAAACTATATACAAACCAAA	.......(((((((((((((((.((.(((....((((....))))....))).)).)))))).))))))))).........................................................
THC0290_N_0466	dnaG	THC0290_0643	5'UTR of dnaG mRNA, DNA primase (DNA replication)	62	1	777700	777762	-9.1	-2.08261	-10.38	-9	0.124992	TTTCAAAATATTTTTCTAGATTTTAATGTTTGCAGAAAAATCTAAAACCTAAAATCTAAAAGA	...........((((.(((((((((..((((..(((....))).)))).))))))))).))))
THC0290_N_0798		THC0290_rRNA_0004	5’ region of 30S pre-rRNA	469	1	1404410	1404879	-64.9	-2.05735	-72.08	-59.6	8.66589e-06	TGCAAAACCAAAAAGAAGTATTACTTTTGCACCCGCATTGGCACACAGTTCTTATTACATATTAAAAACGAATCGAAAAAAAATAAAACAAAAATTTTATTAAAAAGATTAGGAAAATAGCAAAAAGAAACTACCTTTGCACCCCGCAAGAGATTAAGTTCATTCATAAATTGGTTAAGAAAAAGAAAAGCAAACGAGAATAAATATTTTCAAAAAAAACTTATCAAAAAGCTTGCCAGTTAAAAAATAACCACTACTTTTGCACCCGCTTCGAGAAACAGATAAAGACACAAACGAGGCTAAAAAAAAGCAAGACAAGTTCCTAGACATATTGAATTGACAGCCGTTTTAAATAGCGATATTTAAAACAAAAGAATAAAGAGTAAGAGCGAATCGTAA…	....................((((((((((....))...(((...((((((..............................(((((((......)))))))........((((((....(((((...........))))).....(((((((.....(((.(((....(((((((.(((.....((.(((.....((((((....))))))........))).))......))))))))))....)))))).....)))))))....((((((.....................))))))...................))))))........))))))...)))((((((((((....)))))))))).........))))))))...((((((....…
THC0290_N_1240		THC0290_1852	5'UTR of THC0290_1852 mRNA, probable transmembrane protein of unknown function	83	1	2152054	2152137	-9.9	-2.05658	-11.4	-1.34	0.0873728	TCATAAATATCTGAATTTAAAAACAATTACCACAACAACCCATAATTTTTGGGTCGTAATTTTTAATTCGTAATTAATTCTTAA	............(((((.....(((((((.....((.(((((.......))))).))......))))).))....)))))....
THC0290_N_1005	fahA	THC0290_1535	5'UTR of fahA mRNA, Fumarylacetoacetase involved in L-Phe and L-Tyr degradation	55	1	1789837	1789892	-6.5	-2.05299	-7.16	-6.5	0.341365	AGAATTATCAACACAAGAGCGTTAGCTATTAACGCAGTAAATAAAAAAATAATTAT	..................((((((.....)))))).....................
THC0290_N_0932		THC0290_1446	5'UTR of THC0290_1446 mRNA, protein of unknown function	68	1	1677871	1677939	-10.6	-2.00074	-12.17	-7.3	0.0784994	AAATTTTTTTGAATATCGAATGTTGATTAACGAATGTCGATTTCAGAAGTTTAAAATAGAAAAATAGAA	.....((((((((.(((((...(((.....)))...)))))))))))))....................
THC0290_miscRNA_0050		THC0290_2296	TPP riboswitch [THI element], putative TonB-dependent receptor (RFAM)	105	-1	2654507	2654611	-19.8	-1.97805	-20.97	-19.8	0.149247	ATCGTCTCAAAGGGGTGCTAGATTTCAAAAAACGAATAACAGCTGAGATTATACCCACAGAACCTGAGCAAGTAATGTTGCTAAGGGAATAAATGACAAATAAGG	...(((......(((((...(((((((................))))))).)))))......(((.(((((......))))).)))........)))........
THC0290_miscRNA_0002	thiS	THC0290_0431	TPP riboswitch [THI element], thiamine biosynthesis (RFAM)	96	1	524890	524985	-22.5	-1.14086	-24.53	-21.6	0.0369877	CGATAACTTTAGGGGTGTCTGCAAAATGTAGGCTGAGATTTTACCCTCGAACCTGATGCAGTTCATACTGCCGTAGGAAAAAGTAAGATGACTTCT	..........(((((((((((((...)))))))((((........))))..((((..(((((....)))))..)))).............))))))
THC0290_miscRNA_0046	trpE	THC0290_1688	Bacteroidete tryptophan peptide leader RNA, tryptophan biosynthesis (RFAM)	129	1	1959533	1959661	-19	-0.974926	-21.03	-15.8	0.0370372	TTTGAACTTTAATTAAGAACATGAACACATTTTTAAACAATACTTGGTGGTGGAATAATTTACGTCAAACGTCGTGAACTAATCCTCTATATTGTATTTTTAAAACTCAAAATATAAAAAAGGCTTGTC	..............................(((((((.(((((...((((.(((.((.((((((........)))))).)).))).))))...))))))))))))........................
THC0290_miscRNA_0001	metK	THC0290_0287	SAM-II long loops riboswitch, S-adenosyl-L-methionine synthesis (RFAM)	61	-1	345053	345113	-6.8	-0.877834	-7.24	-6.8	0.492156	AATCGAGAGGAAAAATTTGAACTGATTGCAACCTCGTTAAAAAAATGCTAAAGCAGAAATT	......((((...((((......))))....))))..........(((....)))......

## Sheet: additionnal_long 5'TRs
Locustag	Start	End	Strand	Downstream gene, function	Length	NfeatAS	NfeatAS.newregions	NfeatAS.CDSs	CumLengthAS.CDSs	NfeatAS.others	AS.ltag.main	AS.ltag.all	cdsprednumber	cdspredinfo	cdspredproba	cdspredoverlapbp	cdspredaaseq	MFEoptim	MFEoptimZscore	MFEensemble	MFEcentroid	MFEfrequency	sequence	Opt2D
THC0290_N_0556	900417	900873	1	hutU(THC0290_0756), Urocanate hydratase	457	0	0	0	0	0	-	-	0	NA	NA	NA	-	-67.15	-0.96633	-76.47	-42.95	2.72948e-07	TGAATTTACAAAGTAAAGAAAATAAACCAATAGAAGGCGAAGATTTCTATTACACACCAGAAGGCTACAAATGCTTTACAGATAAATACCACTTAAAACGGGGCTATTGTTGCAAAAGCGGATGCCGCCATTGTCCCTATGGTTTCAATAAAAAAACAGGAACAATAAAGAAGTAAAAAAATAGCGATTGCAAACAGATTAGTAACACTATGATATGAATAACCAATCATTAAAATACAGCATTATGATATACAAATCCTACCATAGATCAGTTATTCGTTATCCATAGCTTTTTTATAATAACAACCCGTTTTAATGATATTATTTATTTAACTAACAGTTTACCATCAGTTTACCATAAATTAAAAACAACAACAGTTCTTAGTTTCAACCTATTCT…	(((.(((((...)))))...........((((((((.......))))))))........((((((((..((((......(((((((((.((.(((((((((((((((((((((((..((((...)))).(((((.(((...((((........))))))).))))).....................)))).)))))..))))....((((((((((((((((..(((......................................)))..)))))))).))).))))).................))))))))))))....)))))))))........((..((.....))..))...(((((((.(((.......))).))))))).....))))..…
THC0290_N_0905	1637088	1637440	1	prfB(THC0290_1415), Peptide chain release factor 2 (RF-2)	353	2	1	0	0	1	THC0290_N_0904	THC0290_flavo-1_0075;THC0290_N_0904	0	NA	NA	NA	-	-64.9	-1.48025	-71.43	-46.1	2.51925e-05	TCAATCAATCCTCTTTAGGAGCTATTCCCGCTATCCGTTACAATCTTTTCCTGGCTAAAGGAGCCAGAAAAAGGATTTTCACTACTATCGGGGCTAGAAAAGAAGCATTATTATTAATACAAAATTAAACAAATTTATGACAAATACCGAACAAATAAAAGGTATTGTGGAGCGCCTTGGTGCGTTAAGGAGGTATCTTTGACGTTGATGCAAAACTAATAGAAATTACAAACGAAGAAGAAAAAACCTTTGCCCCCAACTTTTGGAACAATGCAAAAGAAGCCCAAATCATTGTAAAAAACCTACGATCAAAAAAAAAATGGGTAGAAGATTACAACACCGCAGTCAAAATG	........((((....))))..........(((((((((..((((((((.((((((.....))))))..)))))))).............(((((.........((((((...(((((.....)))))...........((((.((((............))))))))...((((....))))((((((((....))))))))..)))))).....................(((((..........))))).......((((((........)))))).))))).....((((((.......)))))).........)))))))))..........................
THC0290_N_1405	2456890	2457173	1	THC0290_2134, ABC transporter	284	0	0	0	0	0	-	-	0	NA	NA	NA	-	-38.7	-0.372441	-44.52	-33.8	7.93947e-05	TATAAACAAAAAAAATCACACAACTGATTGTAATGCTGCTCGAAAAACAACAGCTTCTTTTGCCATCTTTCCTAGAATATTAACTGCAAATGATATTGTAGGTTTGTCTCCTTTTTAACCAAAAAAATTGTTTTGAAGTTGGAAGAACTATGTTAAAAAAGACAAATGAGTTGTAAATTAGCAATGATAATTTTCCTTTAGGGACTACTTTAGTTACAAAACTTAAAGAATAGCACAATGAAAACATATAAAAAAATATCCAATCAAATAGTAAGAATAAAACC	........................((((((....((((............))))................((((.(((((((........))))))).))))(((((((..(((((((((((((......))))).((((.....))))..)))))))))))))))((.(((((......)))))..))....((((...))))(((((((((((....))).)))))..)))....(((....))).............))))))..................
THC0290_N_1027	1806085	1806310	-1	pyrE(THC0290_1552) Pyrimidine biosynthesis	226	1	1	0	0	0	THC0290_N_1028	THC0290_N_1028	0	NA	NA	NA	-	-44.9	-0.604503	-48.98	-28.04	0.00132677	GCCACCAGCTTTATGAACAGGGATTTTGGCCTTTAGGGTTTTCATAATTTCTTTTTCGTCAGGGTGATACAGGTAAGCTTGCTGTAGTTTGTTCTGGAAGAAATTAACAATAATCTGATTGATATCTGCGCTTTCTAACAAGAAAAATTTAAAATCAGTTTCTTTTTTGATTTCATTTGTTAGAAAAAGTGGCTTGTCGTTCACAAAAACTTTATACATTTGTACT	((((....((((......))))....))))...(((((((((..(((((((((((....((((.((...((((....))))...)).))))....))))))))))).........(((.(((((.((((..(((((((((((..(((((.((((.........)))).)))))..)))))))))))..))))..))))).)))..)))))))))............
