# Supplementary material for: Transcriptome architecture and regulation at environmental transitions in flavobacteria: the case of an important fish pathogen
Source: ISME Commun. 2021 Jul 7;1:33. doi: 10.1038/s43705-021-00029-9 (PMC9723704; doi:10.1038/s43705-021-00029-9)
Supplement: Supplementary file 9 — Table S8 [file 43705_2021_29_MOESM9_ESM.xlsx]

## Sheet: Legend
Table S8: Properties of the putative small RNAs (84 indep TRs and 4 ubiquitous sRNAs) identified in the transcriptome of F. psychrophilum OSU THCO2-90.
Column legend	Description
Locustag	Locustag of the indep transcribed region retrieved from the transcriptional map of this study.
Name	Short name (Rfp1 to Rfp88) defined such as "RNA in Flavobactium psychrophylum".
Strand	(+) for positive, (-) for negative strand.
Start	Coordinates of the indep transcribed region according to the F. psychrophilum THCO2-90 genome sequence (ENA accession numbe LT670843).
End	Coordinates of the indep transcribed region according to the F. psychrophilum THCO2-90 genome sequence (ENA accession numbe LT670843).
Length	Length of the indep transcribed region (nts)
Comments	Information on the indep TR including antisense CDS, secondary structure prediction, putative coding sequence, annotation).
MFEoptim	Minimum free energy of optimal secondary structure predicted with RNAfold tool.
MFEoptimZscore	Z-score of the MFE optimal secondary structure (correct for difference in nucleotide compositions between sequences). Predicted structures were considered only if MFEoptimZscore < -2 (cutoff threshold).
MFEensemble	Free energy of the thermodynamic ensemble (partition function) predicted with RNAfold tool.
MFEcentroid	Minimum free energy of the centroid structure (the secondary structure with minimal base pair distance to all other secondary structures in the Boltzmann ensemble).
MFEfrequency	Frequency of the MFE structure in the ensemble.
sequence	Nucleotide sequence of the indep TR.
RNA_sequence	RNA sequence of the indep TR.
Opt2D	Minimum Free Energy structure representation in bracket notation.

## Sheet: Indep TRs
Locustag	Name	Strand	Start	End	Length	Comments	MFEoptim	MFEoptimZscore	MFEensemble	MFEcentroid	MFEfrequency	sequence	sequence_RNA	Opt2D
THC0290_N_0006	Rfp1	-1	5284	5631	348	antisense of THC0290_0005; transcribed from a putative Sig54 promoter (SM4)	-74.7	-1.22297	-80.83	-57.9	4.81417e-05	ATCATATATTTGATCTAAAAACCAATTGTATAATTCGCGGTGCATGACAAATTCTAAGGTACAAATAGAGTGAGAAATTTGCTCTATATAATCGCTTTGGCCATGAGCAAAATCATACATGGGATAAATTTTCCAATCGTTTCCTGTTCTATGATGGTGACGGTGCAAAACCCTGTACATTAATGGATCACGCATGAGCATATTTTTAGAAGACATGTCAATTTTAGCACGCAAAACGTGTGTTCCTTCTTCGAAATCACCATTTTTCATGCCTTCAAATAAAGTCAGATTTTCTGCTACAGAACGGTTTCTAAAAGGACCATCAACACCTGGTTGTGTTGGTGTTCC	AUCAUAUAUUUGAUCUAAAAACCAAUUGUAUAAUUCGCGGUGCAUGACAAAUUCUAAGGUACAAAUAGAGUGAGAAAUUUGCUCUAUAUAAUCGCUUUGGCCAUGAGCAAAAUCAUACAUGGGAUAAAUUUUCCAAUCGUUUCCUGUUCUAUGAUGGUGACGGUGCAAAACCCUGUACAUUAAUGGAUCACGCAUGAGCAUAUUUUUAGAAGACAUGUCAAUUUUAGCACGCAAAACGUGUGUUCCUUCUUCGAAAUCACCAUUUUUCAUGCCUUCAAAUAAAGUCAGAUUUUCUGCUACAGAACGGUUUCUAAAAGGACCAUCAACACCUGGUUGUGUUGGUGUUCC	((((......))))....(((((..(((((......((((....((((..(((..((((((...(((((((((.....)))))))))......((((..((.((((......))))...(((((......)))))..((((.((...........)).))))(((((......))))).............))..)))).........(((((............(((((((.....)))))))...)))))((((........)))).))))))..)))...))))......)))))))))...)))))......(((.(((((((((......))))))))).)))
THC0290_N_0010	Rfp2	1	10630	10929	300	antisense of THC0290_0010	-59.8	-1.32975	-65.58	-46.4	8.43643e-05	TTCTTTCCGATTGTCTGTACGGACCAAATTTTTCGTTTTTTCCTATAGTTTCATCAGGAGAAATTCCTAACCATTTTAATGCTTCTAGTATATATTCTTCGGCACCTGGAACAAAACGATTTTGGTCTGTATCTTCTATTCGTAAATAGAAAACGCCGTTGTGTTTTTTAGCAAATAAATAATTAAATAAAGCAGTACGTACACCACCTATATGTAAAGCTCCCGTTGGGCTTGGTGCAAAACGCACACGAACTTGTTTAGACATTTTTGTAAATTTTGATACAAAGATAAATGATTAAC	UUCUUUCCGAUUGUCUGUACGGACCAAAUUUUUCGUUUUUUCCUAUAGUUUCAUCAGGAGAAAUUCCUAACCAUUUUAAUGCUUCUAGUAUAUAUUCUUCGGCACCUGGAACAAAACGAUUUUGGUCUGUAUCUUCUAUUCGUAAAUAGAAAACGCCGUUGUGUUUUUUAGCAAAUAAAUAAUUAAAUAAAGCAGUACGUACACCACCUAUAUGUAAAGCUCCCGUUGGGCUUGGUGCAAAACGCACACGAACUUGUUUAGACAUUUUUGUAAAUUUUGAUACAAAGAUAAAUGAUUAAC	............((((((((((((((((....(((((((((((............((((.....))))...........((((...((........))..))))...)))).))))))).))))))))))))....((((.((...((((((((((....)))))))))))).)))).............(((..((((((.........))))))..)))(((...))).(((((((.....)))).)))........))))(((((((((........)))))))))...........
THC0290_N_0029	Rfp3	1	49141	49425	285		-59	-0.840893	-64.73	-56.5	9.10316e-05	AATTTACTGCAATAACAAATGCACGGTTTGTTATTGCAAGGAATGATAAATCCTATTAAGTGATTCAGATTATGAGATTCCTCGCTACTCGGAATAATATACGCACCAATATTACAGTCTTTTTTAAATTAAAACAGTATAGGTGTCTTGTTTTTCATGACATATCAAGATAATAAAGCCATTGGGTGTAATTCGTTTCTAATAGACAGAGTCATATATTTTAAGCCGTTTTGCTTTAGTAATAGGCAACATAGCTTTGTGGGCTAAGAATTGGTTTGGCTAACG	AAUUUACUGCAAUAACAAAUGCACGGUUUGUUAUUGCAAGGAAUGAUAAAUCCUAUUAAGUGAUUCAGAUUAUGAGAUUCCUCGCUACUCGGAAUAAUAUACGCACCAAUAUUACAGUCUUUUUUAAAUUAAAACAGUAUAGGUGUCUUGUUUUUCAUGACAUAUCAAGAUAAUAAAGCCAUUGGGUGUAAUUCGUUUCUAAUAGACAGAGUCAUAUAUUUUAAGCCGUUUUGCUUUAGUAAUAGGCAACAUAGCUUUGUGGGCUAAGAAUUGGUUUGGCUAACG	.......(((((((((((((.....)))))))))))))((((........)))).....(((((((.((.((((((....)))).)).))((((((((.(((((.(((((.(((..(((((.....................(((((.((.....)).)))))...)))))..)))....))))))))))))).))))).........))))))).......((((.((.((((((.......)))))).)).)))).((.(((((((......))))))).)).
THC0290_N_0037	Rfp4	-1	64013	64179	167		-33.2	-2.9134	-36.33	-25.3	0.00618567	CTCAAATAAAAACCGTTTTTACAAACAGATGGTTTTTATTAAGCTTCTGTAAACTTAGTTTGCTATTAAAATCATTTTTTAGGCTTTTGCACCTCAAGAAAAGAGCAATCGTTATGCGCCAAAAAAAACAACAAGTTAAAATGCGATTTATTTAAGAATAAATCGCA	CUCAAAUAAAAACCGUUUUUACAAACAGAUGGUUUUUAUUAAGCUUCUGUAAACUUAGUUUGCUAUUAAAAUCAUUUUUUAGGCUUUUGCACCUCAAGAAAAGAGCAAUCGUUAUGCGCCAAAAAAAACAACAAGUUAAAAUGCGAUUUAUUUAAGAAUAAAUCGCA	....((((((((((((((........)))))))))))))).(((((..((((((...))))))........((.(((((((((........))).)))))).))(((.......)))...............)))))....(((((((((((....)))))))))))
THC0290_N_0039	Rfp5	1	69429	69507	79	antisense of THC0290_0047	-3.8	1.75106	-5.95	2.8	0.0305014	TTAAAGTTTTATTATTATTATCAAAAACTACTATAGAATTATTAGAATATCTTGACATTGCAGTATTTTGGGCCTTATT	UUAAAGUUUUAUUAUUAUUAUCAAAAACUACUAUAGAAUUAUUAGAAUAUCUUGACAUUGCAGUAUUUUGGGCCUUAUU	....((((((((....................)))))))).(((((((((..((......)))))))))))........
THC0290_N_0055	Rfp6	-1	92909	92951	43		-2.9	-0.473049	-3.86	-0.9	0.211647	CTCGGAATGACAACATCCTCAATAAATATTCCAGTATTTTTAA	CUCGGAAUGACAACAUCCUCAAUAAAUAUUCCAGUAUUUUUAA	...((((((.................))))))...........
THC0290_N_0068	Rfp7	1	113267	113949	683		-147.7	-0.332059	-161.86	-114.77	1.06037e-10	GGTTTTCTGATACAAATGGAAAGTGTTACATAGCCCTGATTGAGCTGATATCCTTTTTTTGTCGCCTTTTTTGGCGGAAAAAAAGATAAAAGCGAAAGCAGGAATGTAGATTACAAAAATGCCCGAGCCAGTCGCTCCTAAAAAATGAGAGTAGGAACCTAGAAACGCTGAAATTTTCGACTGGTCGTTTTATAAAACCAGCTTTAATTTTTGAAATTGATATTGAAAACTGGATTGAAACGATTGAAGGGTTGCCATCAAAATAAAAAAAAGGTTTTTAATTTAGCTGTGAAGAATGAAACTATAAATATCGCACAGATGGTTGGAAGTAAAATAGATTGTTTGTTATTGTGCCGAGAGTTATAATAGATAGTTTTATACGGTTTAGGCTGGCGATTG…	GGUUUUCUGAUACAAAUGGAAAGUGUUACAUAGCCCUGAUUGAGCUGAUAUCCUUUUUUUGUCGCCUUUUUUGGCGGAAAAAAAGAUAAAAGCGAAAGCAGGAAUGUAGAUUACAAAAAUGCCCGAGCCAGUCGCUCCUAAAAAAUGAGAGUAGGAACCUAGAAACGCUGAAAUUUUCGACUGGUCGUUUUAUAAAACCAGCUUUAAUUUUUGAAAUUGAUAUUGAAAACUGGAUUGAAACGAUUGAAGGGUUGCCAUCAAAAUAAAAAAAAGGUUUUUAAUUUAGCUGUGAAGAAUGAAACUAUAAAUAUCGCACAGAUGGUUGGAAGUAAAAUAGAUUGUUUGUUAUUGUGCCGAGAGUUAUAAUAGAUAGUUUUAUACGGUUUAGGCUGGCGAUUG…	((((((.(((............(((((((((...((((.((..(((..((((.(((((((.(((((......))))))))))))))))..)))..)).)))).))))))..)))......((((((((((((((.(((((...........)))))...(((.....))).......))))))))(((((((.....((((.((((((.((.......)).))))))..))))..))))))).((((.((....)).))))...........((((((...((((....))))....))))))...........((((((((((............))))))))))(((((((........))))))).(((((((((((.((.(((...((((....)…
THC0290_N_0075	Rfp8	-1	129929	130108	180		-31.4	-1.77153	-34.53	-30.7	0.00621255	AAATAACAAATATACGGTTTGCTATTGCGAGATTCCTAGTTCCTCGTAATACAATATACGGACCAAATATTACGGCGTTTTTAAAATTAAAACGGCATAAGTTATAAAAAAAGAGAGGGTTGTAGTTTTAATAATATCGCAATCTTTTTTGAATAAAAAAACGCATTCAAGTAAATGAAT	AAAUAACAAAUAUACGGUUUGCUAUUGCGAGAUUCCUAGUUCCUCGUAAUACAAUAUACGGACCAAAUAUUACGGCGUUUUUAAAAUUAAAACGGCAUAAGUUAUAAAAAAAGAGAGGGUUGUAGUUUUAAUAAUAUCGCAAUCUUUUUUGAAUAAAAAAACGCAUUCAAGUAAAUGAAU	........(((((..((((((.(((((((((...........))))))))).......))))))..)))))...((((((((....(((.(((.......))).)))....((((((((((((.((.........)).))))))))))))......))))))))(((((......)))))
THC0290_N_0080	Rfp9	1	136276	136338	63	antisense of THC0290_0107	-4.9	0.20071	-6.38	-4.9	0.0905219	TCCTTATTTTTTTAGTTTCGTTGGGTTTTAAATCTAAATTCCAAGTTAAAATTCCAGTTTCAG	UCCUUAUUUUUUUAGUUUCGUUGGGUUUUAAAUCUAAAUUCCAAGUUAAAAUUCCAGUUUCAG	....................(((((.((((....)))).)))))...................
THC0290_N_0084	Rfp10	-1	155251	155313	63		-2.7	-0.308104	-3.97	-2.2	0.126726	TTTTTTAATCTCTTTTTGAAATCGTCTTTTAAGCTGTTTTTTTACACCAAAAAACCATCAACT	UUUUUUAAUCUCUUUUUGAAAUCGUCUUUUAAGCUGUUUUUUUACACCAAAAAACCAUCAACU	..((((((.......))))))..............(((((((......)))))))........
THC0290_N_0107	Rfp11	1	182563	182671	109		-23.5	-2.62881	-26.32	-20.4	0.0103351	TGAGTTAGTTAAGTGAATTTAAAATGATTTTGTTTTGCATTTAAAAAAAAAGGCGTTCATGAAATTATTTCTTGAACGCCTTTTGAAATTTATAGGATAATTTTTTAGT	UGAGUUAGUUAAGUGAAUUUAAAAUGAUUUUGUUUUGCAUUUAAAAAAAAAGGCGUUCAUGAAAUUAUUUCUUGAACGCCUUUUGAAAUUUAUAGGAUAAUUUUUUAGU	........(((((((....((((((......)))))))))))))...((((((((((((.((((...)))).))))))))))))((((((........)))))).....
THC0290_N_0109	Rfp12	1	184225	184363	139	antisense of THC0290_0150	-31.6	-1.02751	-34.13	-25.5	0.0166	CTAGAGTGTTTACCGTATAATTGGGTTGCGGTAACTTAAACTCTATATCTGAGGGTTTAAGTTTCGGGTAGTCCTCTGTGGCAAGATTTACTAAATGTAAGCGTTGGTAGTCATCGAGTAAAGTGTCTTTCTTTTTTAG	CUAGAGUGUUUACCGUAUAAUUGGGUUGCGGUAACUUAAACUCUAUAUCUGAGGGUUUAAGUUUCGGGUAGUCCUCUGUGGCAAGAUUUACUAAAUGUAAGCGUUGGUAGUCAUCGAGUAAAGUGUCUUUCUUUUUUAG	((((((....(((((((.........)))))))(((((((((((.......)))))))))))...(((....)))....((((...((((((..(((...((....))...)))..)))))).))))......))))))
THC0290_N_0129	Rfp13	-1	208062	208134	73	induced under iron depletion	-20.7	-3.7297	-21.67	-20.7	0.20603	CCATTACATAAGTAGGTTAAGTTATGGTAGATTTGGGGCAAAAAAGGCGGAACTTAATAATTCCGCCTTTTTT	CCAUUACAUAAGUAGGUUAAGUUAUGGUAGAUUUGGGGCAAAAAAGGCGGAACUUAAUAAUUCCGCCUUUUUU	((((.((.(((.....))).)).))))............(((((((((((((........)))))))))))))
THC0290_N_0130	Rfp14	1	208381	208488	108		-30.7	-5.24739	-32.23	-30.7	0.0837358	TAAAGGTTAAATTTACTGGGATAAAAAAACATACAGTTTGTCATTCTGAGGAACGAGGAATCTCATCAAGTTATTCAGATTATGAGATTCCTCGGAATGACAACATCC	UAAAGGUUAAAUUUACUGGGAUAAAAAAACAUACAGUUUGUCAUUCUGAGGAACGAGGAAUCUCAUCAAGUUAUUCAGAUUAUGAGAUUCCUCGGAAUGACAACAUCC	..............((((...............))))(((((((((.......(((((((((((((..((((.....)))))))))))))))))))))))))).....
THC0290_N_0156	Rfp15	-1	251422	251487	66		-7.8	-0.379196	-10.03	-7.6	0.0270205	CCATTACACATGTAGGTTAAGTTTATTGAATATTTTTGAGAAAAAAGGTGAAATTAAAATTTCACC	CCAUUACACAUGUAGGUUAAGUUUAUUGAAUAUUUUUGAGAAAAAAGGUGAAAUUAAAAUUUCACC	...((((....))))...............................((((((((....))))))))
THC0290_N_0160	Rfp16	1	255408	255603	196	antisense of THC0290_0205	-40.5	-2.10426	-43.83	-38.1	0.00453532	TCAGAAAGTTGGGTTTTATCGAATACTTCGGTATGGGTTTTAAGCTGTTTTGCTTTTTCTAAAACCTTGGCATTTATGTTGTTAGTAAATACCGATGCGATGTTTACTTGATTATTATTTTTGAAATATAAAATAATATTTTCGGCATTAGACCCTGATCCCGAAGCAAATATTACAACCTTTTTCATTTATAGTG	UCAGAAAGUUGGGUUUUAUCGAAUACUUCGGUAUGGGUUUUAAGCUGUUUUGCUUUUUCUAAAACCUUGGCAUUUAUGUUGUUAGUAAAUACCGAUGCGAUGUUUACUUGAUUAUUAUUUUUGAAAUAUAAAAUAAUAUUUUCGGCAUUAGACCCUGAUCCCGAAGCAAAUAUUACAACCUUUUUCAUUUAUAGUG	......((((((((..(((((......((((((((((((((((((......))).....))))))))(((((.......)))))....)))))))..)))))...))))))))(((((...(((((.......((((((((((((.(((((...))))).))))...)))))))).......)))))...))))).
THC0290_N_0169	Rfp17	1	266572	266801	230	antisense of THC0290_0218	-46.5	0.580621	-51.44	-38	0.000328002	GCAAAAACGGTGATTTTTATGGGGATGGTGTCTATCTTTGGAAATAGAATTTTGATGGAATCTTGGGTTAGTTTTTCTTGAAGGGTATTTGTTACAAGCTCGAAAAAACATTGTTTTCGGGCAATTTTATCATTGATGGAATCGCATTGGGTGGTGCTTGGAAAATCATCTACTTCGTTCCAATTTATTTTTTTTAATTCTTGTTGTAGTAAATCGCCTTTGGCGGGTAC	GCAAAAACGGUGAUUUUUAUGGGGAUGGUGUCUAUCUUUGGAAAUAGAAUUUUGAUGGAAUCUUGGGUUAGUUUUUCUUGAAGGGUAUUUGUUACAAGCUCGAAAAAACAUUGUUUUCGGGCAAUUUUAUCAUUGAUGGAAUCGCAUUGGGUGGUGCUUGGAAAAUCAUCUACUUCGUUCCAAUUUAUUUUUUUUAAUUCUUGUUGUAGUAAAUCGCCUUUGGCGGGUAC	((..(((.((((((((((((((((((((...))))))))((((.(((((...(((((((((..(((((..(((((((.......(((.....)))..(((((((((.......))))))))).((((((((...)))))))).(((((....)))))..))))))).)))))....))))))..)))....))))).))))....)))).))))))))))).))......
THC0290_N_0179	Rfp18	1	284741	284837	97	CopraRNA predictions include 4 mRNAs encoding metalloproteases and a putative adhesin	-27.2	-3.97829	-28	-27.2	0.272626	CAATTGAGGGGGTGGTTCCCTAAAATTGATAAATTTTCATAATTTATAGTTTTTTGGTTGGTTAAGACATAAAAACTCAGTCATTTATTTGACTGGG	CAAUUGAGGGGGUGGUUCCCUAAAAUUGAUAAAUUUUCAUAAUUUAUAGUUUUUUGGUUGGUUAAGACAUAAAAACUCAGUCAUUUAUUUGACUGGG	(((((..(((((....)))))..)))))(((((((.....)))))))(((((((..(((......)))..)))))))((((((......))))))..
THC0290_N_0184	Rfp19	1	297507	297566	60	antisense of THC0290_0241 (Biotin synthase)	-12	0.203033	-13.38	0	0.106073	AAATCCGGGTGGTGGTGGTGCTGGTGGTGGTGGTCCAGATGGAGGGGCAGCATGCGTAAA	AAAUCCGGGUGGUGGUGGUGCUGGUGGUGGUGGUCCAGAUGGAGGGGCAGCAUGCGUAAA	....((((............))))..(((.((.(((.......))).)).))).......
THC0290_N_0198	Rfp20	-1	321293	321392	100	region upstream of metY operon	-14.5	-0.888047	-17.16	-7.4	0.0134508	ATATTTGCAGAATAAAATTATACTCAAAATGAAAATTACAATATGCAATATATGTCGTATGGCCTCGGAAAATTCCGCAGAGTATCGTATTGCATCATTT	AUAUUUGCAGAAUAAAAUUAUACUCAAAAUGAAAAUUACAAUAUGCAAUAUAUGUCGUAUGGCCUCGGAAAAUUCCGCAGAGUAUCGUAUUGCAUCAUUU	...((((.((.(((....))).))))))..............((((((((.....((.(((..((((((....)))).))..))))))))))))).....
THC0290_N_0199	Rfp21	-1	321888	322029	142	region upstream of metY operon	-26	-0.974496	-29.66	-15	0.00265278	AATTTTACAGGAAACATCCCCTCGGGCATTACCTATTATAATTCAACCCTTGTAAAGTATAGTATTTACTAACGATATATGGACAGATTCGAGTCCCGTCCAGACCGCTAAAATTGGGAAAAGCGATTCAGAAATGAATCGC	AAUUUUACAGGAAACAUCCCCUCGGGCAUUACCUAUUAUAAUUCAACCCUUGUAAAGUAUAGUAUUUACUAACGAUAUAUGGACAGAUUCGAGUCCCGUCCAGACCGCUAAAAUUGGGAAAAGCGAUUCAGAAAUGAAUCGC	.((((((((((............(((.....)))..............)))))))))).((((....))))........(((((.(((....)))..)))))..(((.......))).....((((((((....))))))))
THC0290_N_0219	Rfp22	1	361577	361788	212		-36.5	-1.55493	-40.58	-25	0.00133212	CTATTAATTAATTTGTTTTAAAAATTTTTATGTCTAGATGAAAATTTAGGGTTTTGTATTCGATTAAAATATACTTTAATACGCATTGAGTACTATAGAGCTAAAAAAGACAAAAAATGAGGAGGCAAAAGTTTTTTTTTGATAAATGGAAAAATTCAAATGACTTCATGGTGTAAAAAGGTATAAAAAAAGCGTTCACAATTTGTGAACGC	CUAUUAAUUAAUUUGUUUUAAAAAUUUUUAUGUCUAGAUGAAAAUUUAGGGUUUUGUAUUCGAUUAAAAUAUACUUUAAUACGCAUUGAGUACUAUAGAGCUAAAAAAGACAAAAAAUGAGGAGGCAAAAGUUUUUUUUUGAUAAAUGGAAAAAUUCAAAUGACUUCAUGGUGUAAAAAGGUAUAAAAAAAGCGUUCACAAUUUGUGAACGC	...........((((((((..((((((((((......))))))))))..(((((((((((((((....................)))))))))...))))))....))))))))..((((((.......(((((((((.........))))))))).......))))))......................(((((((((...)))))))))
THC0290_N_0223	Rfp23	1	376405	376471	67		-11.5	-1.52926	-12.36	-11.5	0.249358	TATAAGCAAAGTATTAGTTGTTTGTATTGTTGATTTCTGCTAACAGTTAAATTATTGTTGTTGCTAC	UAUAAGCAAAGUAUUAGUUGUUUGUAUUGUUGAUUUCUGCUAACAGUUAAAUUAUUGUUGUUGCUAC	....(((((.....((((.(((((.(((((((........)))))))))))).))))...)))))..
THC0290_N_0238	Rfp24	-1	397725	397782	58	antisense of THC0290_0327	-0.2	1.36215	-1.08	0.2	0.239665	ACCGAGGGATTTATAAGAACAATACAAAAAACACCAGCAACGATAAGAATTTTTAACA	ACCGAGGGAUUUAUAAGAACAAUACAAAAAACACCAGCAACGAUAAGAAUUUUUAACA	.....((..(((................)))..)).......................
THC0290_N_0248	Rfp25	1	418605	418919	315		-53.9	0.0166169	-61.16	-42.31	7.5998e-06	TAATAAAGTTCTTTTAATTAGTAGTATTTAATAGTCTTAGATTAATGTAGCGGGGTAGTACAATTTGTTGCATTTCTTCATCAAAATTGGCAATTATGTTTTTTCAATTGTAATTTTAAGTGCAAACGTTTTTTTGGTTAATTTTTTTTTGGAGATTTTAGTTTTTTTTTCGCTTCTTTCTTAGTGGTATTTGAAGGGGTGGTGTTAAAATTTTTTCTCTGTTTTTATTGGCTTATATGATTTTGGTGAAATAATAAACGCAAAATCGATTTTTGATTGTCGAATTAAATACCATTAAAACAGCTTATTAGTATA	UAAUAAAGUUCUUUUAAUUAGUAGUAUUUAAUAGUCUUAGAUUAAUGUAGCGGGGUAGUACAAUUUGUUGCAUUUCUUCAUCAAAAUUGGCAAUUAUGUUUUUUCAAUUGUAAUUUUAAGUGCAAACGUUUUUUUGGUUAAUUUUUUUUUGGAGAUUUUAGUUUUUUUUUCGCUUCUUUCUUAGUGGUAUUUGAAGGGGUGGUGUUAAAAUUUUUUCUCUGUUUUUAUUGGCUUAUAUGAUUUUGGUGAAAUAAUAAACGCAAAAUCGAUUUUUGAUUGUCGAAUUAAAUACCAUUAAAACAGCUUAUUAGUAUA	((((((.(((.(((((((.....(((((((((((((...))))(((((((((((.........)))))))))))..((((((((((((((((....)))).......(((((........)))))..........(((((((.......((((((....((((((....((((((((((.............))))))))))....))))))...)))))).....))))))).....))))))))))))...............(((((........)))))))))))))).))))))).))))))))).....
THC0290_N_0257	Rfp26	1	430687	430866	180	antisense of THC0290_0351	-31.6	-0.672261	-35.66	-28.2	0.00137992	GGTTTTCTGGTTAGTCGATTACCCCATTTTCGATAATACTAAAACTTTTCTCTTTACAATTTATTTCGGCATTTAATCCGTATGGGATTGTAAATGTAGGGCTTGTATGTCCGAAATTCATTTCTGTTACAATAGGCAACTCTGTTAATTGTAATTCGTCTCTAATAATTTGCAATAAAA	GGUUUUCUGGUUAGUCGAUUACCCCAUUUUCGAUAAUACUAAAACUUUUCUCUUUACAAUUUAUUUCGGCAUUUAAUCCGUAUGGGAUUGUAAAUGUAGGGCUUGUAUGUCCGAAAUUCAUUUCUGUUACAAUAGGCAACUCUGUUAAUUGUAAUUCGUCUCUAAUAAUUUGCAAUAAAA	((((((...((((.((((...........))))))))...))))))..........(((.(((((...(((((((((((.....))))..))))))).((((......))))((((....)))).((((((((.((((....)))).))))))))........))))).)))........
THC0290_N_0264	Rfp27	1	441896	442163	268	antisense of THC0290_0359;THC0290_N_0263;THC0290_N_0265	-57.6	-2.38766	-62.59	-50.7	0.000305355	AAATTACAACTTATAGGACGAACAATTTTTGATTAAAAAAACCCAACTAAAAGCTGGGTTTTTTAAAAATTATCTTATTTGAAAGCTGGAATTCCGGTAATATCCATACCTGTAATAAGTAAGTGAATATCATGAGTTCCCTCATAAGTAATTACGCTTTCTAGATTCATCATGTGGCGCATGATAGAATATTCTCCAGTAATTCCCATTCCTCCAAGGATTTGGCGTGCTTCACGGGCAATGTTTATTGCCATGTCTACATTATTTC	AAAUUACAACUUAUAGGACGAACAAUUUUUGAUUAAAAAAACCCAACUAAAAGCUGGGUUUUUUAAAAAUUAUCUUAUUUGAAAGCUGGAAUUCCGGUAAUAUCCAUACCUGUAAUAAGUAAGUGAAUAUCAUGAGUUCCCUCAUAAGUAAUUACGCUUUCUAGAUUCAUCAUGUGGCGCAUGAUAGAAUAUUCUCCAGUAAUUCCCAUUCCUCCAAGGAUUUGGCGUGCUUCACGGGCAAUGUUUAUUGCCAUGUCUACAUUAUUUC	...............((((....(((((((((.....((((((((.((...)).))))))))))))))))).((......))..((((((.....((((.......)))).......((.((((((((((.(((((....)))))..)).))).))))).))..(((((((((((...))))))).))))....)))))).....(((.((((...))))..)))((((...))))((((((....))))))..))))..........
THC0290_N_0284	Rfp28	1	481943	482257	315	putative ORF with lipoprotein signal peptide (artefact CDS on the opposite strand)	-89.5	-3.64686	-94.44	-66.94	0.000329965	AATTAATAATTAACCTTTATAATTAAGTAAGATGAAAAAAGTTGTTTTAAGTTTAGCTTTAGTAGCTATGATGAGTGTTTCTTTCGTATCATGTAAAGATGCTGCTGCTGAGGCTCCAGTAACTGAAGAAGCTACTCCAGTAATGGAAGAAGCTGTTGATTCTGCAGCTGTTGTTGCTGATTCTGCTGCTACTACTGCAACTGAAGCTGTAGCACCTGCTGCTGAAGCTGCTGCACCTGCTGCTGAAGCTGCTGCACCTGCAAAAAAATAATTAGAAAACACTTCTAAAAATTTTAAACCACGCCATTGGCGTGG	AAUUAAUAAUUAACCUUUAUAAUUAAGUAAGAUGAAAAAAGUUGUUUUAAGUUUAGCUUUAGUAGCUAUGAUGAGUGUUUCUUUCGUAUCAUGUAAAGAUGCUGCUGCUGAGGCUCCAGUAACUGAAGAAGCUACUCCAGUAAUGGAAGAAGCUGUUGAUUCUGCAGCUGUUGUUGCUGAUUCUGCUGCUACUACUGCAACUGAAGCUGUAGCACCUGCUGCUGAAGCUGCUGCACCUGCUGCUGAAGCUGCUGCACCUGCAAAAAAAUAAUUAGAAAACACUUCUAAAAAUUUUAAACCACGCCAUUGGCGUGG	......((((((.......))))))..((((((((......))))))))....(((((((((((((......((((((((((((.(((((.......)))))...(((((......)))))...)))))))).))))((((..(((.((.(((.((.((.((.(((((....))))).)).)).)).))).)).)))..)))).((.(((((((...(((.....)))))))))).))))))))))))))).(((....)))..(((((..((((((.....))))))..)))))...(((((((...)))))))
THC0290_N_0389	Rfp29	-1	658597	659019	423	antisense of THC0290_N_0390 ; putative CDS (658751,658927,-) aaseq=MKVYVNGYGLRPFRIEETIENPTQYKGSFELPKGVERADGEKWIKLDYYFTEKELIAK	-80	-0.765844	-88.98	-58	4.6763e-07	AAAATATGTCGTTACGAAGTTCGCCACTTCATGAAGCGGCGGAACGTTGTGTGAGATTATAAAGAACCAACGTGCTAAAAACACAAAACAGAATGAAAGTGTATGTAAACGGATATGGTTTAAGACCATTTAGAATTGAAGAGACAATAGAAAACCCTACCCAATATAAAGGTAGTTTTGAACTTCCTAAAGGTGTAGAAAGAGCAGACGGAGAAAAGTGGATAAAATTAGATTACTATTTTACCGAAAAAGAGTTAATAGCTAAATAGGAACTTTAGTTACTTCTTTAACAGTAGTTTTAGGATTCTTTTTAGCATACTCTTCGGTAACAGTTCTACCAGTAATAGCACTTCTGTAAAGAGTTACAGTCTTGTATTTAACTTCTTTAGCCATAATAAA…	AAAAUAUGUCGUUACGAAGUUCGCCACUUCAUGAAGCGGCGGAACGUUGUGUGAGAUUAUAAAGAACCAACGUGCUAAAAACACAAAACAGAAUGAAAGUGUAUGUAAACGGAUAUGGUUUAAGACCAUUUAGAAUUGAAGAGACAAUAGAAAACCCUACCCAAUAUAAAGGUAGUUUUGAACUUCCUAAAGGUGUAGAAAGAGCAGACGGAGAAAAGUGGAUAAAAUUAGAUUACUAUUUUACCGAAAAAGAGUUAAUAGCUAAAUAGGAACUUUAGUUACUUCUUUAACAGUAGUUUUAGGAUUCUUUUUAGCAUACUCUUCGGUAACAGUUCUACCAGUAAUAGCACUUCUGUAAAGAGUUACAGUCUUGUAUUUAACUUCUUUAGCCAUAAUAAA…	...((((...(((((....((((((.(((....))).))))))((((((.((.............)))))))).......((((..............))))...........(((((((.((((((((((...((((......))))........(((((.........))))).((((..(((.(((......))).)))..)))).......)))))).......((((..(((...(((((((...(((((.....((((((.((((.((..(((((((........)))))))..))..)))).))))))..)))))))))))).)))))))..(((((..(((...((((((....))))))...)))..)).))))))).))))))).....…
THC0290_N_0390	Rfp30	1	658610	658815	206	antisense of THC0290_N_0389; putative CDS (658627,658758,+), aaseq=MAKEVKYKTVTLYRSAITGRTVTEEYAKKNPKTTVKEVTKVPI	-33.1	-0.786044	-39.12	-26.2	5.71407e-05	AATTAAATTTATTTATTATGGCTAAAGAAGTTAAATACAAGACTGTAACTCTTTACAGAAGTGCTATTACTGGTAGAACTGTTACCGAAGAGTATGCTAAAAAGAATCCTAAAACTACTGTTAAAGAAGTAACTAAAGTTCCTATTTAGCTATTAACTCTTTTTCGGTAAAATAGTAATCTAATTTTATCCACTTTTCTCCGTCTG	AAUUAAAUUUAUUUAUUAUGGCUAAAGAAGUUAAAUACAAGACUGUAACUCUUUACAGAAGUGCUAUUACUGGUAGAACUGUUACCGAAGAGUAUGCUAAAAAGAAUCCUAAAACUACUGUUAAAGAAGUAACUAAAGUUCCUAUUUAGCUAUUAACUCUUUUUCGGUAAAAUAGUAAUCUAAUUUUAUCCACUUUUCUCCGUCUG	.............((((.(((((.....)))))))))..(((((((((....)))))((((((..........((((((((((((((((((((..((((((..((((......(((.((.....)).))).......))))...)))))).....)))))...))))))..)))))..))))........)))))).....)))).
THC0290_N_0450	Rfp31	-1	757950	758024	75	transcribed from SigECF promoter (SM6)	-10.7	-1.22283	-12.48	-9.7	0.0558925	ATACCAGAAAATAATTATTTGCTCTGGATAACAAATTTCACTTTGTTAAGTGTTCAGAATTAGTATATTTGCACC	AUACCAGAAAAUAAUUAUUUGCUCUGGAUAACAAAUUUCACUUUGUUAAGUGUUCAGAAUUAGUAUAUUUGCACC	...(((((((((....))))..))))).(((((((......))))))).((((...((((......)))))))).
THC0290_N_0460	Rfp32	-1	767146	767422	277	antisense of THC0290_0631;THC0290_N_0461	-57.4	-2.22138	-62.47	-53.8	0.000266859	ATTAGTACAAAGTCATAAAGTAACAAAACGGAAAGGTTTGTTAGATTGCATCATGTTTTTTTAGTTTTCTCCCTTTGAAAAAAAAAAAAAAATTAAATAGAATCTCAAGACTTTATGACTTTTAACTTTTTTACTTTTAACTTTTTTATTAAGAAGCCATTTCTAATCGCTTCAACAAGTTTTTTGTTAAGGTATGGTGTGCATATTCCTTATCGATATTCAGAATTTTATCGTCTGAACTTGGTAATTCGTACATAGCATCGGTTAAGATGGCTTC	AUUAGUACAAAGUCAUAAAGUAACAAAACGGAAAGGUUUGUUAGAUUGCAUCAUGUUUUUUUAGUUUUCUCCCUUUGAAAAAAAAAAAAAAAUUAAAUAGAAUCUCAAGACUUUAUGACUUUUAACUUUUUUACUUUUAACUUUUUUAUUAAGAAGCCAUUUCUAAUCGCUUCAACAAGUUUUUUGUUAAGGUAUGGUGUGCAUAUUCCUUAUCGAUAUUCAGAAUUUUAUCGUCUGAACUUGGUAAUUCGUACAUAGCAUCGGUUAAGAUGGCUUC	...(((..((((((((((((((((((.((......)))))))(((((.......((((((((..(((((.......)))))....)))))))).......)))))....)))))))))))))..))).........................((((((((((.(((((((((.(((((.....))))).))))..(((((...(((...(((((((..((((((.........)))))).)))))))...)))....))))))))))))))))))))
THC0290_N_0464	Rfp33	1	768887	769220	334	antisense of THC0290_0634	-60	-0.635738	-66.97	-55.91	1.22682e-05	GTAATTGCCCGTTTTCTTGCATACCTTCGCACAAGCACAAACCAGAATAACCAGTATATGTGCCTATTTCGAGAATGTTTACCGGACGAATGAGTTTGCTTAACATACTGAGAACACGACCCTGAAAATGTCCGCTCAGCATTCTGGGCAACAAAATTTTCTGGTAGGTTTCTTTATTAAGTTGTGCTAATAATTCAGGTTCGTTTTCTGAATGTTGCTCGATATAATCTTCTAAATCTTGTGAAAGGAAATGCATTTGATAAAATTTTAAGCAAAAATACAAATTACCAAAACAACAAATTACTAAATCAACAAAATAACCTAAATTTGCACC	GUAAUUGCCCGUUUUCUUGCAUACCUUCGCACAAGCACAAACCAGAAUAACCAGUAUAUGUGCCUAUUUCGAGAAUGUUUACCGGACGAAUGAGUUUGCUUAACAUACUGAGAACACGACCCUGAAAAUGUCCGCUCAGCAUUCUGGGCAACAAAAUUUUCUGGUAGGUUUCUUUAUUAAGUUGUGCUAAUAAUUCAGGUUCGUUUUCUGAAUGUUGCUCGAUAUAAUCUUCUAAAUCUUGUGAAAGGAAAUGCAUUUGAUAAAAUUUUAAGCAAAAAUACAAAUUACCAAAACAACAAAUUACUAAAUCAACAAAAUAACCUAAAUUUGCACC	((((((....(((((..(((((..(((..((((((((((...................))))).(((.(((((((((((((..(((((((((((((.((.((((.....(((((.((.(((..((((((....((((((....))))))......)))))).)))..)))))))......)))).))....))))))..)))))))..)))))))).))))).)))............)))))..)))..)))))(((((.......))))).................)))))....))))))..............................
THC0290_N_0475	Rfp34	-1	790755	790883	129	antisense of THC0290_0655	-19.3	-0.335266	-21.82	-16	0.0168772	CGAAACTTGTAAAACTACCGATAAATTTTCTGCTAAGAATATTCCGCAAAATACTGGGATTAGCATTTCTTTTCGAACTGCAATGGCTAAAACGGCTATAATTCCGCCAATGGTTAAACTCCCCGTATC	CGAAACUUGUAAAACUACCGAUAAAUUUUCUGCUAAGAAUAUUCCGCAAAAUACUGGGAUUAGCAUUUCUUUUCGAACUGCAAUGGCUAAAACGGCUAUAAUUCCGCCAAUGGUUAAACUCCCCGUAUC	.......................(((.((((....)))).))).......((((.((((...(((.(((.....))).))).((((((.....))))))......(((...))).....)))).)))).
THC0290_N_0486	Rfp35	-1	803241	803318	78		-17.8	-2.0903	-18.83	-16.6	0.187513	CCCTAAAACCGATAACTAACAGTTTGATTAACTGTTCGTTTTTTGATTGATGATTGAAACTCCGGCTGATTACCGGAG	CCCUAAAACCGAUAACUAACAGUUUGAUUAACUGUUCGUUUUUUGAUUGAUGAUUGAAACUCCGGCUGAUUACCGGAG	.........(((.(((.(((((((.....))))))).)))..)))..............((((((.......))))))
THC0290_N_0510	Rfp36	-1	840044	840245	202	transcribed from a putative Sig54 promoter (SM4)	-50.3	-1.62922	-54.57	-48.4	0.00097713	AGATGCTATTGAAGAAATCTGTGTTGCTTTTTTGCGCCGTATTAGTAACGTACAGTCCTAAAATAATAGTGACTATCCTGAAATTAGAAAGATCTTCTTGGTGCTAAAACTAGCCAAGGGGGTAATACAAAATCCTAACTAGCCCTGACGCTGGAATTGTTGGAGCTCTTCGCATTTTTCTTGCGAAAGCGACTTCCAGCAG	AGAUGCUAUUGAAGAAAUCUGUGUUGCUUUUUUGCGCCGUAUUAGUAACGUACAGUCCUAAAAUAAUAGUGACUAUCCUGAAAUUAGAAAGAUCUUCUUGGUGCUAAAACUAGCCAAGGGGGUAAUACAAAAUCCUAACUAGCCCUGACGCUGGAAUUGUUGGAGCUCUUCGCAUUUUUCUUGCGAAAGCGACUUCCAGCAG	...................(((((((((((((((.((.((.((((((......(((((((......))).))))...(((....))).((((...))))..)))))).))..))))))))))))))))).........(((((......)))))...((((((((((.((((((.......)))))))))....))))))).
THC0290_N_0551	Rfp37	1	892388	892599	212		-26.8	0.296001	-31.31	-22	0.000666376	CCTATTTTAGATGAAATTTTATATGAATAAGCGGTTGAAAAAGCACATTAGGAATGTGCCTGTTTGCGGAATTGTGCAAGATAAAAATTAGCTTTCGGATTTAGACAAACAATTAAATAAGCTCAATAAAAAATTAAAGTATTATAGGGAATAGAAATTGTAGAATAATCGAGATTTAATTAACTCATATCAAAAAAAAAGTGAAATTCTAT	CCUAUUUUAGAUGAAAUUUUAUAUGAAUAAGCGGUUGAAAAAGCACAUUAGGAAUGUGCCUGUUUGCGGAAUUGUGCAAGAUAAAAAUUAGCUUUCGGAUUUAGACAAACAAUUAAAUAAGCUCAAUAAAAAAUUAAAGUAUUAUAGGGAAUAGAAAUUGUAGAAUAAUCGAGAUUUAAUUAACUCAUAUCAAAAAAAAAGUGAAAUUCUAU	...((((((.......(((.((((((....((((........(((((((...)))))))))))(((((......)))))......((((((.((((((..(((.....((((((...((..(((.((((............)))).)))..))..))))))....))))))))).))))))...)))))).))).......)))))).....
THC0290_N_0560	Rfp38	1	907245	908039	795	antisense of THC0290_0761	-176.8	-1.29302	-191.16	-127.4	7.55134e-11	AAGTTTCGATAAAAATTGTTGGTGAGAATCAGATTGCGAATGAAACGGTTTATGGTGTAGTCCTTTTTGAATATCACAAACCTGTTGCATGGTAGCAAATTCTTTTGAATCGATATAATTCTCGAAAAAACGAATCCAAATATAATTGATCGCCGTTTGGTTTGGATGCAACATATCTTCGGTATAAAAACGATAATCCCGTAGTTCATCTATCATGATTTCGAAACTTGGAAAGTAATTGATAATTGATAATTGACAGTTTGCAACTTTGTGAATTGCAGAAATTAAATGCGATTTGCTTAGTGTATTTTCTGCAAAGCCATCTTTAATATGGCGAACGGGAGAAACTGTAAAAATAAATTTGGCTTCTTTGTTTATTTCAGTAATTAAAGTGACTAT…	AAGUUUCGAUAAAAAUUGUUGGUGAGAAUCAGAUUGCGAAUGAAACGGUUUAUGGUGUAGUCCUUUUUGAAUAUCACAAACCUGUUGCAUGGUAGCAAAUUCUUUUGAAUCGAUAUAAUUCUCGAAAAAACGAAUCCAAAUAUAAUUGAUCGCCGUUUGGUUUGGAUGCAACAUAUCUUCGGUAUAAAAACGAUAAUCCCGUAGUUCAUCUAUCAUGAUUUCGAAACUUGGAAAGUAAUUGAUAAUUGAUAAUUGACAGUUUGCAACUUUGUGAAUUGCAGAAAUUAAAUGCGAUUUGCUUAGUGUAUUUUCUGCAAAGCCAUCUUUAAUAUGGCGAACGGGAGAAACUGUAAAAAUAAAUUUGGCUUCUUUGUUUAUUUCAGUAAUUAAAGUGACUAU…	(((((((((.......(((((....(((((((((.((((.......(((((.((((((..((......)))))))).)))))((((((...)))))).((((.(((...((((........))))..))).)))).(((......))).)))).))))))))).....)))))........(((((((.(((.......)))...(((..(((((...((((........)))).....)))))..))).....((((((((((((((..((((((((((.........))))))))))..)))...(((((((....(((((.......)))))...))))))).((((...((((((((...........))))))))))))(((.(((((.((...…
THC0290_N_0564	Rfp39	1	913998	914265	268		-49.6	-0.22079	-56.66	-33.2	1.06219e-05	AATGTAATTGAAATATAATGTTCTGTTCATTTATAAAAAATATTTGTAAATATATGTATTATTTCGAGGATTGATTCAGTATTTAGGCGGTTTTCTCGCATTGGCTATAACTTTCGGATTGGAATCAGTAAACAGATTGGCTTTAGCCAAAATGAGCATTGTGTTTTTTCTAAAGTCGGTTAATTTGAAATTGCTTTTGGTTTTAACCAGCGGTAATTCAGCTAGTTCTTTGATTGTAATTTTTATCCTTAAATTAGTTACAGGAATT	AAUGUAAUUGAAAUAUAAUGUUCUGUUCAUUUAUAAAAAAUAUUUGUAAAUAUAUGUAUUAUUUCGAGGAUUGAUUCAGUAUUUAGGCGGUUUUCUCGCAUUGGCUAUAACUUUCGGAUUGGAAUCAGUAAACAGAUUGGCUUUAGCCAAAAUGAGCAUUGUGUUUUUUCUAAAGUCGGUUAAUUUGAAAUUGCUUUUGGUUUUAACCAGCGGUAAUUCAGCUAGUUCUUUGAUUGUAAUUUUUAUCCUUAAAUUAGUUACAGGAAUU	..(((((((((((((..((((.......(((((((((.....)))))))))))))....))))))((((((.((((((((....((((((.....))))(((((((...(((((.(((..(((..((((...((..(((((....)))))..))...))))..)))..)))))))).)))))))(((((.(((((.(((((....))))).))))))))))......))...)))).))))...)))))).....)))))))......
THC0290_N_0573	Rfp40	1	927787	927860	74		-17.2	-2.66528	-18.82	-13.7	0.0716419	AAATTCATAGAATTTTGTTTGGTTTGGTTAGTTTATACGAAAGTCAGCATCTAGGTGCTGACTTTTTTGTTTTA	AAAUUCAUAGAAUUUUGUUUGGUUUGGUUAGUUUAUACGAAAGUCAGCAUCUAGGUGCUGACUUUUUUGUUUUA	(((((.((.(((((......))))).)).)))))(((.((((((((((((....)))))))))))).)))....
THC0290_N_0588	Rfp41	1	955247	955570	324	antisense of THC0290_0800	-69.7	0.788699	-76.71	-33.8	1.14236e-05	CTAACAGCATTTTAAATAATTTGACTGTTGCTAGTGCATCTCCTTCGGCACGATGTCTGTTAGTCATTGGGATTCCTAGTGCTCGAACTAATTTTCCTAAGCTATATGAGGGTTGTTCTGGAATTAGTATTTTAGCTAGTTCGACTGTGCATAGCGTTTTTGCTTGAAAATCGTAACCTAGACGGCTAAATTCTGTGCGAAGAATTCGGTAATCGAAAACGGTATTGTGTGCAACAATTATACAATCTTTTGTGATTTCTACAATGCGTTTGGCTACTTCGTGAAACTTGGGTGCAGAAACCAACATAGCATTATTTATTCCCG	CUAACAGCAUUUUAAAUAAUUUGACUGUUGCUAGUGCAUCUCCUUCGGCACGAUGUCUGUUAGUCAUUGGGAUUCCUAGUGCUCGAACUAAUUUUCCUAAGCUAUAUGAGGGUUGUUCUGGAAUUAGUAUUUUAGCUAGUUCGACUGUGCAUAGCGUUUUUGCUUGAAAAUCGUAACCUAGACGGCUAAAUUCUGUGCGAAGAAUUCGGUAAUCGAAAACGGUAUUGUGUGCAACAAUUAUACAAUCUUUUGUGAUUUCUACAAUGCGUUUGGCUACUUCGUGAAACUUGGGUGCAGAAACCAACAUAGCAUUAUUUAUUCCCG	(((((((((((.....((((......))))...((((..........)))))))).))))))).....((((....(((((((.((((.(((((((.((.....)).)))))))))))..((((((((......))))))))...(((((((((((((((((.........(((.......)))(((.((((((......)))))).)))...))))))))...))))))))).......(((((....))))).............((((.((......)).))))...(((......))).....))))))).....)))).
THC0290_N_0601	Rfp42	1	976566	976680	115	antisense of THC0290_0819	-18.1	0.455142	-20.26	-12.91	0.0301586	TAGCTACTAAAGCTCCTGCATAAAAATCGAGTGTCATATTGAGAAATTTATCTTTTTTGAGTCGTGCTTTGGTCGAATTGATAGTGTCTTGGTCTAATTTTGTTAGATTAAATGG	UAGCUACUAAAGCUCCUGCAUAAAAAUCGAGUGUCAUAUUGAGAAAUUUAUCUUUUUUGAGUCGUGCUUUGGUCGAAUUGAUAGUGUCUUGGUCUAAUUUUGUUAGAUUAAAUGG	.....((((((((....((.((((((..((((.((.......)).))))....)))))).))...))))))))...............((((((((((...))))))))))....
THC0290_N_0619	Rfp43	1	1009763	1009899	137	antisense of THC0290_0850	-20	-0.386914	-23.24	-15.8	0.00524408	TCTTTTGGTGTGTATGTATTGGTTTTTAGATAAAAACTGAACCACTTTAATTAAATGATTTCTTGATATTTTAAACTGATCTGATAACTCATCTAAAGAAGTTGTTTTTCCTTCTTTTTGATGATTAAGATACATTA	UCUUUUGGUGUGUAUGUAUUGGUUUUUAGAUAAAAACUGAACCACUUUAAUUAAAUGAUUUCUUGAUAUUUUAAACUGAUCUGAUAACUCAUCUAAAGAAGUUGUUUUUCCUUCUUUUUGAUGAUUAAGAUACAUUA	......((((.((.....(((((((((....)))))))))))))))....(((((..(((....)))..)))))..((((((..(((.(((((.(((((((.........)))))))..)))))))))))).))...
THC0290_N_0643	Rfp44	1	1056450	1057043	594	putative CDS (1056814,1057023,+), aaseq=MKKLISTLAIVTFLFTTNINAQEAKPKDKKECTTHKDKKTCDHKDKKTCTKEEMKSCTKDKKAGCCAKK	-73.7	-0.0270286	-84.43	-64	2.76845e-08	TTATAAAGTTAAGCGTTAGTATATTGTGTTTTTGTTTTATTGCTATAACAGTTGCTCGAACTCTTAAAATAAAAAATATATTTTTCTAAATATCAGATTTCTTGCTGTAAAAACAATAATTTTAAATCCGATAAATGTGAGAAAGTAAAAAGTGTTTTAAGTTTACACTTCGATGCAAGTTAATTTATCATAAATTAGATTGAAGCCGTTTTAATACATAATAATTTCGAAATTCATCAAAAACAAAATTTATATTATACATAATTTTTAACTGAAAAACATAACGAAAATATCCGGTAACCGCCCGAAATAAATTGCATTTCCTAAGAAAAAAATAAGTATTAAATATTAAAAACCATATAAAATGAAAAAATTAATTTCAACATTAGCAATTGTAAC…	UUAUAAAGUUAAGCGUUAGUAUAUUGUGUUUUUGUUUUAUUGCUAUAACAGUUGCUCGAACUCUUAAAAUAAAAAAUAUAUUUUUCUAAAUAUCAGAUUUCUUGCUGUAAAAACAAUAAUUUUAAAUCCGAUAAAUGUGAGAAAGUAAAAAGUGUUUUAAGUUUACACUUCGAUGCAAGUUAAUUUAUCAUAAAUUAGAUUGAAGCCGUUUUAAUACAUAAUAAUUUCGAAAUUCAUCAAAAACAAAAUUUAUAUUAUACAUAAUUUUUAACUGAAAAACAUAACGAAAAUAUCCGGUAACCGCCCGAAAUAAAUUGCAUUUCCUAAGAAAAAAAUAAGUAUUAAAUAUUAAAAACCAUAUAAAAUGAAAAAAUUAAUUUCAACAUUAGCAAUUGUAAC…	......(((((((.(((((((((.((((.(((((((((((((......))))((((((((..(((((((((.........((((((....((((.(((((.(((.(((....))).)))....))))).)))).....))))))........))))))))).......))))).)))..((((((((........))))))))....((......))......................)))))))))..)))).))))).)))).)))))))......((((((.......((.(((....))).))....((((((.((((....))))..................................(((((.......)))))......))))))(((.(…
THC0290_N_0675	Rfp45	-1	1119827	1119911	85	antisense of THC0290_0946; transcribed from a putative Sig54 promoter (SM4)	-18.3	-0.612948	-19.54	-17.9	0.132876	TCGTGTGTTTCTCCTTTTTTTATGTTCCAGCCATAAAAAATACAAGGCACATGGGTATCGTAACTATAAGGGGTTCCGTGGGTTG	UCGUGUGUUUCUCCUUUUUUUAUGUUCCAGCCAUAAAAAAUACAAGGCACAUGGGUAUCGUAACUAUAAGGGGUUCCGUGGGUUG	((((((((((.....(((((((((.......)))))))))....))))))))))......(((((....((....))...)))))
THC0290_N_0695	Rfp46	-1	1143858	1144033	176		-40.4	-2.49951	-43.8	-30.7	0.00404228	ATTTAGACAACATAAATATTTCATTTATTTATTCTTTAGGAGCAATTTCCTGAACCCGAGCCTGAAAGTGCGAACTGGCGAAGGAATCCACTTTATCTTTTTTTCTGCCGAAAAGGCAAGACAAAAAGGATATCGTTCCTATCAGGGCTATGGCATTCTGGCATTAACTTAACAAT	AUUUAGACAACAUAAAUAUUUCAUUUAUUUAUUCUUUAGGAGCAAUUUCCUGAACCCGAGCCUGAAAGUGCGAACUGGCGAAGGAAUCCACUUUAUCUUUUUUUCUGCCGAAAAGGCAAGACAAAAAGGAUAUCGUUCCUAUCAGGGCUAUGGCAUUCUGGCAUUAACUUAACAAU	...........(((((((.......)))))))..((((((((....)))))))).....(((.((..((((....((((((((((((......((((((((((((((((.....))).))).))))))))))..)))))).))...))))..)))))).)))..............
THC0290_N_0717	Rfp47	1	1182025	1182142	118		-11.8	0.165916	-14.17	-6	0.021384	TAAAATTATAGTGATGAATTTTTATTTAAAAAAAAAGATACGAATACCTCACTTTATAAAAATATTTTTTTGGTTTGTTTAATTGTTAATAAAAAATGCTTTAGTCCCCCAACTAAAG	UAAAAUUAUAGUGAUGAAUUUUUAUUUAAAAAAAAAGAUACGAAUACCUCACUUUAUAAAAAUAUUUUUUUGGUUUGUUUAAUUGUUAAUAAAAAAUGCUUUAGUCCCCCAACUAAAG	......((.(((((...((((.(((((........))))).))))...))))).))((((((....)))))).((((((........)))))).....(((((((......)))))))
THC0290_N_0742	Rfp48	1	1225076	1225422	347	antisense of THC0290_1048	-61.6	0.863666	-69.8	-39.01	1.66626e-06	CAAAAGGGTTAGCACAAACCAGTAATCGTCGGAGGGTAAGTTTTCGCCATTATAAGTTCCGTTCCAGCCTGCAGAATTCGAATCTAATTGTTTTAATAATTTTCCAAATCGGTCAAATATATTAATGGTCGCACTGGGTCTAATTTTTATATTTTGTATTATCCAAGTGTCATTTATTCCGTCTCCATTTGGTGTAAAAAACTTAGGGTAATCTAATACATAAATTACTTTTGATGGAGTTGGCAAACAACCATTTTTATCTTTTACATAAATGGTGTACTCGCCAAGAGAAATATTTGTAAAAACGGGACTTTCTTGATAGTTTACTCCATCAATCGAGAATATAT	CAAAAGGGUUAGCACAAACCAGUAAUCGUCGGAGGGUAAGUUUUCGCCAUUAUAAGUUCCGUUCCAGCCUGCAGAAUUCGAAUCUAAUUGUUUUAAUAAUUUUCCAAAUCGGUCAAAUAUAUUAAUGGUCGCACUGGGUCUAAUUUUUAUAUUUUGUAUUAUCCAAGUGUCAUUUAUUCCGUCUCCAUUUGGUGUAAAAAACUUAGGGUAAUCUAAUACAUAAAUUACUUUUGAUGGAGUUGGCAAACAACCAUUUUUAUCUUUUACAUAAAUGGUGUACUCGCCAAGAGAAAUAUUUGUAAAAACGGGACUUUCUUGAUAGUUUACUCCAUCAAUCGAGAAUAUAU	......((((......)))).((..(((...(((((((((((.(((.......((((((((((((((..(((.((.................((((((((((.((.....))..)))).))))))...))))))))))..((((((...((((....(((((((((((....(((((.(((........))).)))))..)))).)))))))..))))...)))))).....(((((((.(((.......))).)))))))(((((((....(((((....)))))...........))))))))))))))))...))).))))))).)).))...)))..))....
THC0290_N_0771	Rfp49	-1	1288802	1288918	117	antisense of THC0290_1102	-28.6	-2.26211	-30.7	-26.6	0.0332004	TGTCGCATCTATAGCAACTGTCACAACTCTAATTTCGCCGCTTGCACCTTCCACTCCATTTTGCGCAATCCACTCTTCGGTAAGATTTGGGGTAGAAGGTGTTATTGCCGAACAAAA	UGUCGCAUCUAUAGCAACUGUCACAACUCUAAUUUCGCCGCUUGCACCUUCCACUCCAUUUUGCGCAAUCCACUCUUCGGUAAGAUUUGGGGUAGAAGGUGUUAUUGCCGAACAAAA	.((.((.......)).))...............((((.((...((((((((.((((((((((((...............))))))..)))))).))))))))...)).)))).....
THC0290_N_0788	Rfp50	1	1317285	1317803	519		-113.8	-2.05049	-124.63	-95.58	2.33619e-08	ATTACATACATTTGCGATTCTTCATATAAAAAATAATTGAAGCATTCGCTTTGAATTTCGTCTTAGAAAACTGGTAATTTTAAAAGGAACGAAATGATAAGTACGATGCTCACGTCCCATGGCGTGGGCTCACTTATTCGTGTGCGGGTATACCAGTACCTTGATAGCGTTTAAGATGAGTTCCATGCCATTTTTTTATTATCTAGGCACAAAATACTCTTCTTATATTCTTAGCGTCGTTTCTTCATTTTTCATAGTCTCGCAATACCATTAATTTATTGAATTAGTTGGGAAAGGCACTGCCTGCGCTTGGCTGCAACAAGTAACGGCAGCGCTCTTTTCTTAAAAAAACCTTAAAAACCAAAAGCCCATGAAATAAAACCAAAAAATCTGTGTAAT…	AUUACAUACAUUUGCGAUUCUUCAUAUAAAAAAUAAUUGAAGCAUUCGCUUUGAAUUUCGUCUUAGAAAACUGGUAAUUUUAAAAGGAACGAAAUGAUAAGUACGAUGCUCACGUCCCAUGGCGUGGGCUCACUUAUUCGUGUGCGGGUAUACCAGUACCUUGAUAGCGUUUAAGAUGAGUUCCAUGCCAUUUUUUUAUUAUCUAGGCACAAAAUACUCUUCUUAUAUUCUUAGCGUCGUUUCUUCAUUUUUCAUAGUCUCGCAAUACCAUUAAUUUAUUGAAUUAGUUGGGAAAGGCACUGCCUGCGCUUGGCUGCAACAAGUAACGGCAGCGCUCUUUUCUUAAAAAAACCUUAAAAACCAAAAGCCCAUGAAAUAAAACCAAAAAAUCUGUGUAAU…	...............((..((((..................((.((((((((...(((((.(((.......((((..(((((..(((...(((((((..((.((((((((........((((((((((((((((((..(((((..((((((....))))))..))).))..)))).)))).)))))))))).............((..........))..............))))))))))..)))))))..................((((((((...)))))))).(((((((((.(((((...(((((.......)))))...))))).)).)))))))........))))))))))))...(((.(((..........................…
THC0290_N_0789	Rfp51	-1	1317710	1317802	93		-23.8	-2.6368	-25.36	-23.8	0.0799366	GTTAAATGAAACTTCGGTTTTGTTTGCTTTGGTCCTCTATTCGTCCGCCAAGAAGAGTTAGAGGGCCTTTTTTTGTGCTTCGCTTTTTGTGTT	GUUAAAUGAAACUUCGGUUUUGUUUGCUUUGGUCCUCUAUUCGUCCGCCAAGAAGAGUUAGAGGGCCUUUUUUUGUGCUUCGCUUUUUGUGUU	..((((((((((....))))))))))....((((((((((((.((......)).))).))))))))).............(((.....)))..
THC0290_N_0791	Rfp52	-1	1390344	1391243	900	low expression level in all conditions of the microarray dataset	-305.7	-10.4899	-320.14	-273.88	6.68235e-11	TATATTTTCCTCTAAGCCGAGAAGTTTCTGCTGAAGACAGATTTAAAAAATGTTGATGAAATAGATTATGTTCTTCGGAAAGGGTATGAAATTTTAAAACAGAAAAAAGAGATAAAATACCATTCCGATTATTTTACTGTTTTGAAAATTCATACTCTTTCTTGGGCTTGATTTTGTGGGTGTGAAAAATTGCTTTATCGAGAATGTGAATTTTGAAGTGAATTTGTAAAGCAATTTATCACACTTACAAAAACAATGAAAAAACTTACCGAGTGCGATGGTGCAGAAGCGCAGGCAAGTGTGTGGTTTTTTATTTGCTTACCGCAATGGTTCTGATTGTTTTTATGATGGCTTGATGCCAGAGAAGTAATATTCAGTTTCCAGTGTTCAGTTTCCAGA…	UAUAUUUUCCUCUAAGCCGAGAAGUUUCUGCUGAAGACAGAUUUAAAAAAUGUUGAUGAAAUAGAUUAUGUUCUUCGGAAAGGGUAUGAAAUUUUAAAACAGAAAAAAGAGAUAAAAUACCAUUCCGAUUAUUUUACUGUUUUGAAAAUUCAUACUCUUUCUUGGGCUUGAUUUUGUGGGUGUGAAAAAUUGCUUUAUCGAGAAUGUGAAUUUUGAAGUGAAUUUGUAAAGCAAUUUAUCACACUUACAAAAACAAUGAAAAAACUUACCGAGUGCGAUGGUGCAGAAGCGCAGGCAAGUGUGUGGUUUUUUAUUUGCUUACCGCAAUGGUUCUGAUUGUUUUUAUGAUGGCUUGAUGCCAGAGAAGUAAUAUUCAGUUUCCAGUGUUCAGUUUCCAGA…	....(((((((..((((......((((((((((((((((((((((....((....))....)))))).)).))))))(((((((((((((.(((((((((((.((((.((..................)).)))).))))))))))).)))))))))))))(((.(((((.((((((((((((((.((((((((((((.........((((((......)))))))))))))))))).)))))))))))))).................))))).)))....))))))))((.((((((.(((((.(((((((((((((.((.(((.(((....((((((((((.((((((((.(((((((..(((......)))................((((((((…
THC0290_N_0797	Rfp53	1	1402602	1402672	71	induced in cells grown on blood medium	-22.7	-5.05535	-23.27	-22.7	0.399087	CAATTTTGAAGCAATTCACAATAAGGATTATTCCGTTGTGAAAACATTTAAAGCGGCCTCTAAAGGGTCGC	CAAUUUUGAAGCAAUUCACAAUAAGGAUUAUUCCGUUGUGAAAACAUUUAAAGCGGCCUCUAAAGGGUCGC	....((((((....((((((((..(((....)))))))))))....))))))(((((((.....)))))))
THC0290_miscRNA_0044	Rfp54	1	1402818	1403137	320	Bacterial RNase P class A	-88.8	-1.22623	-95.23	-77.9	2.94285e-05	AGCGCAGACCGCCTTATCGTCGCCAATTTATTGGGGGAGGAAAGTCCGGACACCAGAGAGAAGCATAGCGGGTAACACCCGTCGGCTCCAATTTATTGGGGTTAGGACAAGTGCAACAGAAAGTATGTACAGGTAATGCTGTAGTGAAACCAGGTAAACTCTATGCGGTGAAATTTCAAGTATATCGGTAGTTAAGGGCTTCTCGTCCGTTGCTGAAGGGTAGAAAGATGGAGCTTGTGAGTAATTGCAAGCCTAGATAAATGATAAGGTATCGTTAGTAATATCGAGAACAGAATCCGGCTTATAGGTCTGCTTTTTTT	AGCGCAGACCGCCUUAUCGUCGCCAAUUUAUUGGGGGAGGAAAGUCCGGACACCAGAGAGAAGCAUAGCGGGUAACACCCGUCGGCUCCAAUUUAUUGGGGUUAGGACAAGUGCAACAGAAAGUAUGUACAGGUAAUGCUGUAGUGAAACCAGGUAAACUCUAUGCGGUGAAAUUUCAAGUAUAUCGGUAGUUAAGGGCUUCUCGUCCGUUGCUGAAGGGUAGAAAGAUGGAGCUUGUGAGUAAUUGCAAGCCUAGAUAAAUGAUAAGGUAUCGUUAGUAAUAUCGAGAACAGAAUCCGGCUUAUAGGUCUGCUUUUUUU	...(((((((((((((((((..((((....)))).(((.((((((((.((((((.............((((((...)))))).((((((((....)))))))).......(((((((.....)).))))).((((.((((..(((...(((..(((.....)))..)))...)))...))))))))))).)))..)))))).)).))).(((((....))))).....(((.((((((((....))))))))))).....)))))))))).(((.((....)).)))...................))))))).......
THC0290_N_0806	Rfp55	1	1436072	1436459	388	antisense of THC0290_1243	-81.1	-1.19311	-87.63	-64.4	2.49007e-05	GGCAATGTGTGTTATGTCATCTGCTGAAATTGTGTTTTTAAATAGGCCTTTGTTTTGGCCTTCAATAATAATTGGTTTTAAATGTTTTATTTTGATGCGCATCAAATTTAATATGGCTTCATTAATTTTTGTGCTTTCTTCCCATAAACCATCAGAAAGTAAGGCTACTAAAAAGTGCGGATTTGCTTTGAAAAAGATAAATTGGTTCTGAAATAATTGCACAAATTTTGTTTGGCTATTTTGATTTGAAATGTAGTTTTGTGATAATCGCTGATCGATATTTTCTGCCAGAAAAGTAAGCATTGTGATTATTATTTCTTCTTTGCTTTTGAAATGTCTGTAAATGGCACTTTCTGAAAATTGCATTGCAGATGCCAATTTTTTTATT	GGCAAUGUGUGUUAUGUCAUCUGCUGAAAUUGUGUUUUUAAAUAGGCCUUUGUUUUGGCCUUCAAUAAUAAUUGGUUUUAAAUGUUUUAUUUUGAUGCGCAUCAAAUUUAAUAUGGCUUCAUUAAUUUUUGUGCUUUCUUCCCAUAAACCAUCAGAAAGUAAGGCUACUAAAAAGUGCGGAUUUGCUUUGAAAAAGAUAAAUUGGUUCUGAAAUAAUUGCACAAAUUUUGUUUGGCUAUUUUGAUUUGAAAUGUAGUUUUGUGAUAAUCGCUGAUCGAUAUUUUCUGCCAGAAAAGUAAGCAUUGUGAUUAUUAUUUCUUCUUUGCUUUUGAAAUGUCUGUAAAUGGCACUUUCUGAAAAUUGCAUUGCAGAUGCCAAUUUUUUUAUU	..............((.((((((((((((......)))))...(((((........))))).((((....))))((.(((((........))))).))...(((((((....((((((....(((..(((((((........((..(((((....((((((((((.(((....)))))...)))))))).............))))).))........)))))))..)))...))))))...)))))))((((((((((((((((((((((.........((((((...)))))).........)))))))))))...............((((((((.......)))).))))..)))))))))))))))))).))...........
THC0290_N_0814	Rfp56	-1	1444415	1444724	310	antisense of THC0290_1250;THC0290_1251	-69	-1.69933	-74.42	-61.3	0.000152531	GCAGTAATATATGATTCTGGGATTGTTTTAGTGCTTGATGATACAACTTCAGGAGTCTTACAACTTACCACCGCTAAGCAAATGCCTAGCGGGATAAGGAATTGATATGTTTTTATTTTCTTATACATTTTGATCAATTTCTTCGGTTAATGGATTGTTATTTTGTTTTTTGACCATCTTAATTTTTGCAGCAATACTACCAAATATATAATACAATCCAGGTATTAGTAATACTCCTATGACTGTTCCTAGAAGCATTCCGCCAAGTGCGGCAGTTCCTATGGTTCTGTTACCAATTTTACCCGGTCCG	GCAGUAAUAUAUGAUUCUGGGAUUGUUUUAGUGCUUGAUGAUACAACUUCAGGAGUCUUACAACUUACCACCGCUAAGCAAAUGCCUAGCGGGAUAAGGAAUUGAUAUGUUUUUAUUUUCUUAUACAUUUUGAUCAAUUUCUUCGGUUAAUGGAUUGUUAUUUUGUUUUUUGACCAUCUUAAUUUUUGCAGCAAUACUACCAAAUAUAUAAUACAAUCCAGGUAUUAGUAAUACUCCUAUGACUGUUCCUAGAAGCAUUCCGCCAAGUGCGGCAGUUCCUAUGGUUCUGUUACCAAUUUUACCCGGUCCG	.(((.(((.....))))))((((((....(((((((......(((.....((((((.((((....((((.((((((.((....)).))))))...(((((((((((((((..............))))....))))))))))).......((((((((.(((.(((..((((............................)))).))).)))))))))))))))...)))).)))))).....)))......)))))))((((.....))))(((..((...))..)))..............)))))).
THC0290_N_0840	Rfp57	1	1497415	1497522	108	antisense of THC0290_1299	-19.8	-0.284366	-21.13	-19.8	0.115359	TAATGCTTTTAATGACAATTGGTCTGACAATAATGCTACGTCTTCTATAGAGCCGTCTTTTTTGAGGATTCGTATAGGTTCTGCAGATTTGCTATAGGCCTGATTTCT	UAAUGCUUUUAAUGACAAUUGGUCUGACAAUAAUGCUACGUCUUCUAUAGAGCCGUCUUUUUUGAGGAUUCGUAUAGGUUCUGCAGAUUUGCUAUAGGCCUGAUUUCU	.............((.((((((((((.(((...(((.......(((((((((((.((......)))).))).))))))....)))...)))...)))))).)))))).
THC0290_N_0843	Rfp58	1	1500231	1500590	360	antisense of THC0290_1302;THC0290_N_0842	-80.3	0.136959	-88.24	-62.1	2.55759e-06	AAATTAAATAAATTATTGTTGTTTTGACTGGGTTGAATTTAATATCGAGCTGCGTTAGGGATAGTAGCGAAAATCCTTTTTAGAGGCTTTTCGCCGATAAAAAGATTGTAGCGAATAGCCCGACCCTTGTGGTAACGCCCTAATTTTAGTTTACAAAATTTTCGTCTTTAAAGCCTATTAAATATAACTTGTCTTTTGCTCTTGTCATGGCGGTATATAACCAGCGAATGTAATCTTTATCGATTCCGTTGGGCAAATATGGTTGCTCGATAAATACGGTATTCCATTGTCCGCCTTGCGATTTGTGGCAGGTTATGGCATACGAGAATTTGACTTGCAGGGCATTGAAATATTCATTTT	AAAUUAAAUAAAUUAUUGUUGUUUUGACUGGGUUGAAUUUAAUAUCGAGCUGCGUUAGGGAUAGUAGCGAAAAUCCUUUUUAGAGGCUUUUCGCCGAUAAAAAGAUUGUAGCGAAUAGCCCGACCCUUGUGGUAACGCCCUAAUUUUAGUUUACAAAAUUUUCGUCUUUAAAGCCUAUUAAAUAUAACUUGUCUUUUGCUCUUGUCAUGGCGGUAUAUAACCAGCGAAUGUAAUCUUUAUCGAUUCCGUUGGGCAAAUAUGGUUGCUCGAUAAAUACGGUAUUCCAUUGUCCGCCUUGCGAUUUGUGGCAGGUUAUGGCAUACGAGAAUUUGACUUGCAGGGCAUUGAAAUAUUCAUUUU	....................(((...((.((((((.............(((((..........)))))................((((.(((((((((......))))..))))).))))))))))..))...)))(((((......((((....((((((((((.......(((........((((((((((....((..(((.((.(((((.(((...(((((((((.............))).))))))......((((.(((.((.......)))))..)))))))))))).)))))...)))))))))))))))..))))))))))))))...))))).................
THC0290_N_0844	Rfp59	-1	1505987	1506397	411	antisense of THC0290_1305	-68.4	-0.023654	-76.38	-55.27	2.36317e-06	CGGAATATATACAGTAACCATATCATTATTAGATACCAGATCGTAAGCAAAAAAATCTGACTCAAAAACTTTTGTATTATATTGTAAATAGCTACCTAAATATTGCGGATCAAACAAAACTGATGGCACAAAAGTGAGTAAGTTATTGTTGTGCAAAACAGTAATCTCATCAAAATTTGTGTTTAATTCTGGTGTTTCTTCAAAATATTTAATTAGAGATTGCTCGATTTCTGTTGGATTAGAAATTTTATGAAAAGAAAAACTTCTAATGGTATCAATTGTATCTTTCAACGTATCTTTTATGCAAAAAGAAACCTCAGTTAATGACACTTGAAGTACTAAATTTTTATATTTTTTTTCTAGAATTGTAGCGTTTCCTGAAGACATAATGGCTTTAAA…	CGGAAUAUAUACAGUAACCAUAUCAUUAUUAGAUACCAGAUCGUAAGCAAAAAAAUCUGACUCAAAAACUUUUGUAUUAUAUUGUAAAUAGCUACCUAAAUAUUGCGGAUCAAACAAAACUGAUGGCACAAAAGUGAGUAAGUUAUUGUUGUGCAAAACAGUAAUCUCAUCAAAAUUUGUGUUUAAUUCUGGUGUUUCUUCAAAAUAUUUAAUUAGAGAUUGCUCGAUUUCUGUUGGAUUAGAAAUUUUAUGAAAAGAAAAACUUCUAAUGGUAUCAAUUGUAUCUUUCAACGUAUCUUUUAUGCAAAAAGAAACCUCAGUUAAUGACACUUGAAGUACUAAAUUUUUAUAUUUUUUUUCUAGAAUUGUAGCGUUUCCUGAAGACAUAAUGGCUUUAAA…	.((((....((((((...............((((((((((.(((((((.....(((.(((..((((....))))..))).))).......)))..........)))).((((........))))((((((((.(((((...(((((((((......)))))))))))))).....))))))))....)))))))))).........(((((((.(((((((....))))))))))))))((((((...((((((((.....(((((...((..((.(((((..(((((...((((.....))))...))))).....))))).))..))...)))))......)))))))).....))))))..))))))....))))(((((.((...)).)))))..…
THC0290_N_0860	Rfp60	-1	1567115	1567479	365	antisense of THC0290_1357	-67.2	0.413651	-73.24	-58.5	5.50927e-05	TTTTGTGGTTGCTGATAATGCGAAATTTCTAACTTTAGGGTTTTGAAAATCTATGGCTCTTAGTACTTTGTTTTTGTTTGGGAATGGCAATAATTTGCTAACAATAATATCCTGCGGATAGGGGTTTTCTTCCATTGTGTACATCATAGAACGATAGTCGTCGTAAACTCTATAAAAGCTATAATCGCCAAAGACTGATCCGTAAATAAGAAAGACTAGATATATAAAGATACAAATTACAATAATTGTTTTGAGTGCTCTTAGAATGAGCTGAAAACAGGTTAGGATTATTATAAATAATAAAATTCTATCTATGGGAAGTTGCCAATTTGGATTGATTAAATTCTGATTTATGATGATAAATA	UUUUGUGGUUGCUGAUAAUGCGAAAUUUCUAACUUUAGGGUUUUGAAAAUCUAUGGCUCUUAGUACUUUGUUUUUGUUUGGGAAUGGCAAUAAUUUGCUAACAAUAAUAUCCUGCGGAUAGGGGUUUUCUUCCAUUGUGUACAUCAUAGAACGAUAGUCGUCGUAAACUCUAUAAAAGCUAUAAUCGCCAAAGACUGAUCCGUAAAUAAGAAAGACUAGAUAUAUAAAGAUACAAAUUACAAUAAUUGUUUUGAGUGCUCUUAGAAUGAGCUGAAAACAGGUUAGGAUUAUUAUAAAUAAUAAAAUUCUAUCUAUGGGAAGUUGCCAAUUUGGAUUGAUUAAAUUCUGAUUUAUGAUGAUAAAUA	........((((.......))))............((((((((....((((((((((((((((((((((((...(((((((...((((((....))))))............(((((((...((((((.....((((((......((((((((((....)))))....)))))......)))))).....)))))).)))))))...........))))))).)))))).))).............((((((....((((.......))))..))))))((.(((((((.((((.....))))))))))).)).)))))....))))...))))))....))))))))((((((....)))))).
THC0290_miscRNA_0045	Rfp61	-1	1582336	1582433	98	Bacterial small signal recognition particle RNA	-40	-2.36254	-40.29	-40	0.62347	CGGCAAGTCCTACACGACCAGCTCCTGCAGACTCCTCCAGGGTGGGAACGCAGCAAAGGTATGTGGTTGAGCGGTGCGATGTAGGTCGCTTGCCATTT	CGGCAAGUCCUACACGACCAGCUCCUGCAGACUCCUCCAGGGUGGGAACGCAGCAAAGGUAUGUGGUUGAGCGGUGCGAUGUAGGUCGCUUGCCAUUU	.((((((((((((((((((.(((((((((....(((.....(((....))).....)))..)))))..))))))).)).))))))..)))))))....
THC0290_N_0884	Rfp62	1	1606778	1606919	142		-26.5	0.724454	-29.62	-10.2	0.00633598	CATTTTGTGGTTTGCAACGCAGATGACACGGATTTGATAAATTAAAAAAAATGGATTTGTTTGTTTTTGGAAATAGCTGGGTCAAAATTTTGAATGCTGAATGCTGATGTGCTGCGCCGCGTGAGGGATAGCAGCGGAAATC	CAUUUUGUGGUUUGCAACGCAGAUGACACGGAUUUGAUAAAUUAAAAAAAAUGGAUUUGUUUGUUUUUGGAAAUAGCUGGGUCAAAAUUUUGAAUGCUGAAUGCUGAUGUGCUGCGCCGCGUGAGGGAUAGCAGCGGAAAUC	.....(((.((((((...)))))).)))((((...((((((((..........))))))))....))))....((((....((((....))))..))))...((((.(((.((.(((...))).)).))).)))).......
THC0290_N_0890	Rfp63	-1	1610470	1610784	315	putative CDS (1610712,1610777,-), aaseq=MTTSSINIPVFLKINWYKVEF	-69.5	-1.27692	-76.75	-40.2	7.84183e-06	CCTCGGAATGACAACATCCTCAATAAATATTCCAGTATTTTTAAAGATAAATTGGTATAAGGTTGAATTTTAGACATCATTTTGCGTTAGGGATAGCAGCGAAAATCCTCCCGATTTTTCTTCGGGAGATTGTAGCGTATAGCCCGACCCTTGTGGTAACGCCCAAACGACAATATTTTGGCTAATTAATTGAGTGTTTTTTTTGCAACTCTGTGGCTTTGCGTGAATATCTCTGGCAAAGGCATACTCGCAAGAAAATTGTATAAATTATGAATTAAGATGAAAACAAAAAAAATCCCAATCTTTAGACTGGGA	CCUCGGAAUGACAACAUCCUCAAUAAAUAUUCCAGUAUUUUUAAAGAUAAAUUGGUAUAAGGUUGAAUUUUAGACAUCAUUUUGCGUUAGGGAUAGCAGCGAAAAUCCUCCCGAUUUUUCUUCGGGAGAUUGUAGCGUAUAGCCCGACCCUUGUGGUAACGCCCAAACGACAAUAUUUUGGCUAAUUAAUUGAGUGUUUUUUUUGCAACUCUGUGGCUUUGCGUGAAUAUCUCUGGCAAAGGCAUACUCGCAAGAAAAUUGUAUAAAUUAUGAAUUAAGAUGAAAACAAAAAAAAUCCCAAUCUUUAGACUGGGA	....(((.((....)))))..........(((((((....((((((((.............(((..(((((((...(((((((((((((....)))).))))))...(((((((.......)))))))...........(((((.((...((((.((.........)).))))...)).)))))..(((((......(((((((((.....((((.((((((..((.....))..)))))).))))...))))))))).......)))))))).)))))))...))).............)))))))))))))))
THC0290_N_0903	Rfp64	-1	1635872	1635993	122		-26.8	-2.7671	-29.49	-25.8	0.0126056	GTTGTTTTATTACACGATTTTTTTTAGACTCGAAAAAAACGGGAATTTGTGGTTGCCTTTTTGGGTTTTTTAGCGCATTAGTAGTTAAATTACGAATTATAATAAGATATTATAATTCGTAA	GUUGUUUUAUUACACGAUUUUUUUUAGACUCGAAAAAAACGGGAAUUUGUGGUUGCCUUUUUGGGUUUUUUAGCGCAUUAGUAGUUAAAUUACGAAUUAUAAUAAGAUAUUAUAAUUCGUAA	...((((.(((((............(((((((((((....((.((((...)))).)))))))))))))............))))).))))((((((((((((((...)))))))))))))).
THC0290_N_1010	Rfp65	1	1793424	1793502	79	antisense of THC0290_1538	-19.9	-3.60727	-21.44	-16.3	0.0828047	CCCCATTTGTCACTGTTGTAATGATGCCGGCTTGTAAATTATCGTCGGCTTCAATTACAACTTTTTGAATATCTCCTTG	CCCCAUUUGUCACUGUUGUAAUGAUGCCGGCUUGUAAAUUAUCGUCGGCUUCAAUUACAACUUUUUGAAUAUCUCCUUG	.........(((..((((((((((.((((((............)))))).)).))))))))....)))...........
THC0290_N_1014	Rfp66	-1	1798145	1798224	80		-10.4	-1.1088	-11.53	-10.4	0.159901	ATAATTAGAAATTGCACAATACCTTTTTATATACGATTATTAATTCACCATACTAGAAAAGCGTTTGTTGCGACAAACGC	AUAAUUAGAAAUUGCACAAUACCUUUUUAUAUACGAUUAUUAAUUCACCAUACUAGAAAAGCGUUUGUUGCGACAAACGC	..((((((.(((((...................))))).))))))...............((((((((....))))))))
THC0290_N_1055	Rfp67	1	1843941	1844015	75	antisense of THC0290_1589 (pseudogene)	-12.4	-0.248932	-13.69	-8.41	0.122823	CAATAAAACCAATTTTCTGATTGTAGAAATCGGCAGTAAAAGAACCTGTCATAGTTTGCCCTTGCACCATTGGTG	CAAUAAAACCAAUUUUCUGAUUGUAGAAAUCGGCAGUAAAAGAACCUGUCAUAGUUUGCCCUUGCACCAUUGGUG	.......((((((.........(((((....(((((.........)))))....))))).........)))))).
THC0290_N_1059	Rfp68	1	1853069	1853412	344		-67.9	-3.34483	-73.4	-59.5	0.000133973	ACAGCATTTTGCCTTAGGAATTGAAGTACAAATCATTTTTGAGGCTTTTGTTGCCTCAAAAAGATTACTTCATTATATTTTTTATAGGAGTTTAGCGAACTTGGTTTGTAATGTAAAGCTGGATCCTTACGGTAATGCCCAAATAATGAAATTTAAAAATGCTGTTTATTGTAGAATTAAGCCAAATAAAATAACAATCCTTCAGGTAAAACGAAAAACATTTAAAAATTTGTTTTTTATTTAAATTTGAGACTTCTCTCTATATTTTTTACTTGAACAAAAAAAGCATAAGATTACAATAGCGTTTGTATATTTACAAAAAAACATTAAGATTTAATTTCTTA	ACAGCAUUUUGCCUUAGGAAUUGAAGUACAAAUCAUUUUUGAGGCUUUUGUUGCCUCAAAAAGAUUACUUCAUUAUAUUUUUUAUAGGAGUUUAGCGAACUUGGUUUGUAAUGUAAAGCUGGAUCCUUACGGUAAUGCCCAAAUAAUGAAAUUUAAAAAUGCUGUUUAUUGUAGAAUUAAGCCAAAUAAAAUAACAAUCCUUCAGGUAAAACGAAAAACAUUUAAAAAUUUGUUUUUUAUUUAAAUUUGAGACUUCUCUCUAUAUUUUUUACUUGAACAAAAAAAGCAUAAGAUUACAAUAGCGUUUGUAUAUUUACAAAAAAACAUUAAGAUUUAAUUUCUUA	((((((((((.(((.(((((((((((((...(((.((((((((((.......))))))))))))))))))))....))))))...)))......((((((...))))))...(((..((((........))))..))).................))))))))))(((((((((..(((.((..................(((((((((((.((((((((..........))))))))..........((((....))))......)))))))))))........)).)))..)))))))))..((((((....)))))).......(((((.......)))))
THC0290_N_1078	Rfp69	-1	1878072	1878303	232		-37.1	-0.384671	-42.4	-35	0.000183013	ACTTCTCAATTCGAAATATATTACTTTAAAGGGCTTAATTCTTTTATAAACCGCATTTAAAATTTAATATTTGGGCATTATTAAAAGGATTGAGGGTTTCGTTGCAAACGGGGTTTATTGAACTTTGATAAAAATAACATTAGAGTAAGAATTCTAACCCAAAATACTGCGATTAATAAAATTAAGCTAAATGGTTTATAAGACGTATTATTCTTTTTAGAAAGGAATAATA	ACUUCUCAAUUCGAAAUAUAUUACUUUAAAGGGCUUAAUUCUUUUAUAAACCGCAUUUAAAAUUUAAUAUUUGGGCAUUAUUAAAAGGAUUGAGGGUUUCGUUGCAAACGGGGUUUAUUGAACUUUGAUAAAAAUAACAUUAGAGUAAGAAUUCUAACCCAAAAUACUGCGAUUAAUAAAAUUAAGCUAAAUGGUUUAUAAGACGUAUUAUUCUUUUUAGAAAGGAAUAAUA	.................................((((((((((((((((.((.((..((........))..))))..))).)))))))))))))......((((((....(((((..((..((((((((.........))))))))..)).....))))).......)))))).........((((((....)))))).......((((((((((((...))))))))))))
THC0290_N_1091	Rfp70	1	1894584	1894642	59		-15.5	-2.74427	-16.62	-15.4	0.162453	CAGCATTTTGCATTAGGGATTGAAGTAAAAATTCTTTTTGAGGCTTTTTATGCCTCAAA	CAGCAUUUUGCAUUAGGGAUUGAAGUAAAAAUUCUUUUUGAGGCUUUUUAUGCCUCAAA	..(((...)))...(((((((........)))))))((((((((.......))))))))
THC0290_N_1102	Rfp71	-1	1908771	1909021	251	antisense of THC0290_1645	-45.1	0.695907	-51.61	-35.2	2.56672e-05	TAAGAATTCTAAATGAGATTTCGAATTTTTGAATAAAGTTATTCCTTCAAATTTATGAGTGTTAGAAATTTGGGTTGTAAAATCGATTTTGAAAGTTTTTAGATCGATACAACCAATAATAGTTCCTAAAATTTCGCCATCATTGTAAGTAGATAGTGTGTCTTCGGCTGCGGCTAGAAAGTAAATTTTGTTGTGTACTAAAGTAGCATCGGTAAAGGAGGTTTCTGTGTGTTTTATTTTGGGTAATGAGA	UAAGAAUUCUAAAUGAGAUUUCGAAUUUUUGAAUAAAGUUAUUCCUUCAAAUUUAUGAGUGUUAGAAAUUUGGGUUGUAAAAUCGAUUUUGAAAGUUUUUAGAUCGAUACAACCAAUAAUAGUUCCUAAAAUUUCGCCAUCAUUGUAAGUAGAUAGUGUGUCUUCGGCUGCGGCUAGAAAGUAAAUUUUGUUGUGUACUAAAGUAGCAUCGGUAAAGGAGGUUUCUGUGUGUUUUAUUUUGGGUAAUGAGA	.((((((((.((((...)))).))))))))(((((....)))))...(((((((.(((...))).)))))))(((((((...(((((((.(((...))).)))))))))))))).......(((((((((((..(((((.((((((......))))))..(((((.((((..((((...((((.((......)).))))....))))..))))...)))))....)).)))....)))))))).)))....
THC0290_N_1107	Rfp72	-1	1913432	1913575	144		-14.1	1.37658	-17.7	-5.2	0.00292268	TTTATCTATATGGATTAGAGAGTGATTTAAGCTACAAAAAAAGTTTATTCTAGAACTTTTCGGAAATATAACGGCTCCCAATTTAGGCTATAAATTGAATAAAAATAGGATTGAAACTTTATATATTGAACATTAAAATTATTG	UUUAUCUAUAUGGAUUAGAGAGUGAUUUAAGCUACAAAAAAAGUUUAUUCUAGAACUUUUCGGAAAUAUAACGGCUCCCAAUUUAGGCUAUAAAUUGAAUAAAAAUAGGAUUGAAACUUUAUAUAUUGAACAUUAAAAUUAUUG	....((((.......)))).((((((((..........((((((((......)))))))).(((...........)))(((((((.....)))))))((((.....((........)).....))))........)))))))).
THC0290_N_1125	Rfp73	1	1939566	1939699	134		-36.2	-4.96296	-37.31	-36.2	0.165698	GTGCAAATATATAAATTTAACCCCAAAGTTGGGTAAGAATTTCGCAAAGTTAGGTAAGATTTAGATTCTTTGTGTACTTTGTGAAATTCTTTTCGCTCTTTGTGGCTAAGTAGTTAGGCTAAAACTGATTTTAA	GUGCAAAUAUAUAAAUUUAACCCCAAAGUUGGGUAAGAAUUUCGCAAAGUUAGGUAAGAUUUAGAUUCUUUGUGUACUUUGUGAAAUUCUUUUCGCUCUUUGUGGCUAAGUAGUUAGGCUAAAACUGAUUUUAA	..............(((((.((.(((((...((.((((((((((((((((.....((((.......)))).....)))))))))))))))).))...))))).)).)))))((((((.......))))))....
THC0290_N_1134	Rfp74	-1	1954656	1954725	70	transcribed from SigECF promoter (SM6)	-2.2	0.67134	-3.77	-0.4	0.0778538	AAGTCTAATAAAATACTATATTTGAAATTTTTTGACTGTAATTTAACTTTATTTTTAACCAATAAACACA	AAGUCUAAUAAAAUACUAUAUUUGAAAUUUUUUGACUGUAAUUUAACUUUAUUUUUAACCAAUAAACACA	.((((....(((((............)))))..)))).................................
THC0290_N_1142	Rfp75	-1	1963759	1963927	169	antisense of THC0290_1692	-34.5	-2.04664	-37.4	-31.4	0.00911622	CAAAAACACCTACTTTTTTTATCGATTCAGGAATTTTAGGAATTTCTAGGTCAAAATATCGACTGGATTTCTCCCAGAAAATAAAGCCGAGATAGTCTGGAAGTAATGTACTTACTTCGAGAATATTTTCGGGATATTTCATACCACAAATTTTTAGTTTCATTGTTTT	CAAAAACACCUACUUUUUUUAUCGAUUCAGGAAUUUUAGGAAUUUCUAGGUCAAAAUAUCGACUGGAUUUCUCCCAGAAAAUAAAGCCGAGAUAGUCUGGAAGUAAUGUACUUACUUCGAGAAUAUUUUCGGGAUAUUUCAUACCACAAAUUUUUAGUUUCAUUGUUUU	.......................((..((((((..((((((((((...(((..(((((((..((((.......)))).........((((((...(((.(((((((.....))))))).)))....)))))))))))))...)))..)))))))))).))).)))..))
THC0290_N_1152	Rfp76	-1	1982930	1983021	92		-22.6	-3.67213	-23.8	-22.2	0.143309	TTCATTATACCACAATAGGATAATTGAATTACGAAATCCGATACGCCCCGATGTGTACCGGATTTTGCGGTTTAATATACTTCATTCAACTT	UUCAUUAUACCACAAUAGGAUAAUUGAAUUACGAAAUCCGAUACGCCCCGAUGUGUACCGGAUUUUGCGGUUUAAUAUACUUCAUUCAACUU	.....(((.((......)))))((((((((.(((((((((.(((((......))))).))))))))).))))))))................
THC0290_miscRNA_0047	Rfp77	-1	1986244	1986640	397	Transfer-messenger RNA	-100.7	-1.34618	-108.2	-89.5	5.16117e-06	GGGGTCGACTGGTTTTGACAGCAAGTCGAATTGAATTGTAAGCATGTGGAGAACTGGAGTAATTCTCGTAAATAAAAGGCTCCAAAACACTTACACGGCGAAGGAAACTACGCTCTTGCTGCATAATCTGAATCATAGTAAGATTAGCCACGTTCCTACAAGGTAGGAAAGCAGGATTTACCTCGAAAGCTCTGGTTTATAGCGTTCGATATAGGTGAATCGTAAATTTAAACCTAGAAATAGTTAAGCTTCGGGACTATTTTGAAACTAAGAAGATAAGCTTTGTGTTGCTGTTCTTGGCATACCACACGGTCGAAAATTTAATCGAGAAATAAACATGTAGAAAGCTCTTTAGTTGCTTGTTTGGACCCGAGTTCGATTCTCGGCGACTCCACAA	GGGGUCGACUGGUUUUGACAGCAAGUCGAAUUGAAUUGUAAGCAUGUGGAGAACUGGAGUAAUUCUCGUAAAUAAAAGGCUCCAAAACACUUACACGGCGAAGGAAACUACGCUCUUGCUGCAUAAUCUGAAUCAUAGUAAGAUUAGCCACGUUCCUACAAGGUAGGAAAGCAGGAUUUACCUCGAAAGCUCUGGUUUAUAGCGUUCGAUAUAGGUGAAUCGUAAAUUUAAACCUAGAAAUAGUUAAGCUUCGGGACUAUUUUGAAACUAAGAAGAUAAGCUUUGUGUUGCUGUUCUUGGCAUACCACACGGUCGAAAAUUUAAUCGAGAAAUAAACAUGUAGAAAGCUCUUUAGUUGCUUGUUUGGACCCGAGUUCGAUUCUCGGCGACUCCACAA	(((((((.((((....(((.....)))(((((((((((((((....(((((.....(((.....)))............))))).....)))))).((((.((....)).)))).(((((((.((((((...........))))))))....(((((((...))))))))))))(((((((((((((.(((.........))).)))))....))))))))............(((....))).......(((((.(((......((((((..(((...((((((((((....(((((((...(((....)))...........)))))))...)))))....)))))))))))))).......))).)))))))))))))))))))))))))....
THC0290_N_1161	Rfp78	1	1995370	1995588	219	antisense of THC0290_1717	-45.7	-1.20033	-48.72	-41.1	0.00747246	ACTGAAACATTCTTTGAAGTAATTGTAATACCTCTTTCACGCTCTAAGTCGTTGTTGTCTAGAATTAAATCACCTGTGTTTTCGTTATCACGAAATAGTTGACAGTGATACATGATTTTATCAACCAAGGTAGTTTTACCGTGATCGACGTGAGCAATAATTGCAATGTTTCTAATAGATTCCATCTGTGTTTTTTTGTGGGTGCAAAAGTACATAAAA	ACUGAAACAUUCUUUGAAGUAAUUGUAAUACCUCUUUCACGCUCUAAGUCGUUGUUGUCUAGAAUUAAAUCACCUGUGUUUUCGUUAUCACGAAAUAGUUGACAGUGAUACAUGAUUUUAUCAACCAAGGUAGUUUUACCGUGAUCGACGUGAGCAAUAAUUGCAAUGUUUCUAAUAGAUUCCAUCUGUGUUUUUUUGUGGGUGCAAAAGUACAUAAAA	...((((((((.......((((((((..............((((...((((..((((..((((((((.(((((.(((..((((((....))))))......))))))))...)))))))).))))((.((((....)))).))..))))..)))).))))))))))))))))..............(((((.(((((((....))))))).)))))...
THC0290_N_1190	Rfp79	1	2044074	2044275	202	antisense of THC0290_1758	-37.2	-0.522687	-40.97	-34.5	0.0022082	CCTTTGTTTTTTGCCCATTGTTCGATTTGAAGAATTTCATCATGAGCAGCTTCCATTCCCAATAAACTGAGTGTGGGATTTATTTTGTGGGCATAACCGTATGCGTGGGCATAATCTTTAGCGTTAATTCCTTCTTTTATTTGTTTAACATCTAACGGAACTTCCTCTACAAACAGTTTTACTATTTGCAATACGAAGTCTT	CCUUUGUUUUUUGCCCAUUGUUCGAUUUGAAGAAUUUCAUCAUGAGCAGCUUCCAUUCCCAAUAAACUGAGUGUGGGAUUUAUUUUGUGGGCAUAACCGUAUGCGUGGGCAUAAUCUUUAGCGUUAAUUCCUUCUUUUAUUUGUUUAACAUCUAACGGAACUUCCUCUACAAACAGUUUUACUAUUUGCAAUACGAAGUCUU	.((((((....(((((((((((((...((((....))))...))))))....(((((((((............)))))........))))(((((....))))))))))))......((((.(((((.................)))))..)))).(((...)))....((((.(((...))).))))....))))))....
THC0290_N_1199	Rfp80	1	2063397	2064482	1086	antisense of THC0290_1779;THC0290_1780;THC0290_1781;THC0290_N_1200	-292	-2.15395	-312.61	-261.5	3.0185e-15	TAATATTTTGTGGCATTAGTTAAGCCTACAGATGGTGCGTAGTGTCCTGCTTGCAGTGCTTTTTGGATTACTTGATCTGGTACTTCATCGTCTGTAAAATGACGGGTATCTCTGCGGGATTGTATGATTTGGTCTAGATTCATCTTATTGGGTTGCGGGCGCGTTAGGGATGGTAGCGGCATCCTTTTGTGGCGGGGTTCGCCACAAAAGATATAGCGCACAGCCCGACCCTTGTGGTAACGCCCAAATTATTGGCTCATTTGATCTGATTTTTTTAGGTTTTGTTTCCCTATGATAAAGTATTAATGTTTTGGGGGTATATTATGGTTATTCCTCTTTAATTGTAACAGGAATTCCGGAAATCATTAGTATTACTTTGTTTGCTTTTTGGGCTATATA…	UAAUAUUUUGUGGCAUUAGUUAAGCCUACAGAUGGUGCGUAGUGUCCUGCUUGCAGUGCUUUUUGGAUUACUUGAUCUGGUACUUCAUCGUCUGUAAAAUGACGGGUAUCUCUGCGGGAUUGUAUGAUUUGGUCUAGAUUCAUCUUAUUGGGUUGCGGGCGCGUUAGGGAUGGUAGCGGCAUCCUUUUGUGGCGGGGUUCGCCACAAAAGAUAUAGCGCACAGCCCGACCCUUGUGGUAACGCCCAAAUUAUUGGCUCAUUUGAUCUGAUUUUUUUAGGUUUUGUUUCCCUAUGAUAAAGUAUUAAUGUUUUGGGGGUAUAUUAUGGUUAUUCCUCUUUAAUUGUAACAGGAAUUCCGGAAAUCAUUAGUAUUACUUUGUUUGCUUUUUGGGCUAUAUA…	.......(((((((.........)))(((((((((((.((((....))))....((((((....(((((....))))))))))).)))))))))))....(((((((((((.(((((((...((((.((((((.....(((((((((...((.((((((((((((.((((....(((((....(((((((((((.....)))))))))))...((((....(((((((....((((((((((((..(((...(((.......(((((((.....))))))).....((((((.(((((((((((((((((((.(((((...(((((((((........))))))))).....))))).)))).)))))))...))))))))........((((((((..…
THC0290_N_1213	Rfp81	-1	2096135	2096322	188		-33.5	-1.15	-36.8	-29.7	0.00469341	ACTAATATACTCAAATTAATTCTGAAAGACTTCTTCTTTCTGTGTGGAATCAAGTGAAATTCTTGAACTGTCGTGCAACTGTGTTTTCCTAGTTAAGGAATAAGTCAGATACATATAATTAATTTTTGTTTAAGCATCACGAAAGTGCTTAGACTCACGTAACTTCATTAATCTCTAATGAAACCATG	ACUAAUAUACUCAAAUUAAUUCUGAAAGACUUCUUCUUUCUGUGUGGAAUCAAGUGAAAUUCUUGAACUGUCGUGCAACUGUGUUUUCCUAGUUAAGGAAUAAGUCAGAUACAUAUAAUUAAUUUUUGUUUAAGCAUCACGAAAGUGCUUAGACUCACGUAACUUCAUUAAUCUCUAAUGAAACCAUG	............(((((((((..((((((.....))))))(((((((..(((((.......)))))....))))))).(((....(((((.....))))).....)))........)))))))))..((((((((((.......)))))))))).........(((((((.....)))))))......
THC0290_miscRNA_0049	Rfp82	1	2215650	2215756	107	6S-Flavo RNA, RNA polymerase binding RNA	-17.5	-1.69508	-19.02	-11.6	0.0851946	ACTCAACACTAACAAATTAAAATGAGCAAATCATCGTTACTATAGCAAGCCAATTTAGTTTGGAAGCTTGAACAACGAGTTAACTCAAAACTTGTCAATCCGAGTTT	ACUCAACACUAACAAAUUAAAAUGAGCAAAUCAUCGUUACUAUAGCAAGCCAAUUUAGUUUGGAAGCUUGAACAACGAGUUAACUCAAAACUUGUCAAUCCGAGUUU	............(((((((((.((.((.....................)))).))))))))).(((((((....(((((((.......))))))).....)))))))
THC0290_N_1340	Rfp83	-1	2307904	2308585	682	antisense of THC0290_1979	-177.6	-0.767235	-191.88	-129.2	8.69907e-11	TTTTGCTTCGGTAAAAGCGATGACTTCATCGTGAATGTCATGGGCGATGATGCCTGGAATGGTGGTGTTTTTTAAGAATTTTTGGCTTGTAAATTGGTTAGTGTTTATGTTAAATCGTTGTTGGATGTAGGTTTTTATGAGTTGGCTCATTGTGGTGTTTAGTCCTAATAGGTTGGTGTAGTTTTGTATTAAAACATTGAAATCTGATGGGGAGCCTAATAGTATCATTTTTTCGAGATGGTTTTGTGGGTAATTGTACTGATAGTAGGCGCAGGCGAATGCCCCCATTGAGTGTCCGATGATGAATTTGGGTTGGGTTGTTTTAGAGATTGTGTTGATGAATTGTGCGTATGTGGGAATGTTGAATTCTTTGCCGCTACTTAGTCCGTGTGCTGGTGC…	UUUUGCUUCGGUAAAAGCGAUGACUUCAUCGUGAAUGUCAUGGGCGAUGAUGCCUGGAAUGGUGGUGUUUUUUAAGAAUUUUUGGCUUGUAAAUUGGUUAGUGUUUAUGUUAAAUCGUUGUUGGAUGUAGGUUUUUAUGAGUUGGCUCAUUGUGGUGUUUAGUCCUAAUAGGUUGGUGUAGUUUUGUAUUAAAACAUUGAAAUCUGAUGGGGAGCCUAAUAGUAUCAUUUUUUCGAGAUGGUUUUGUGGGUAAUUGUACUGAUAGUAGGCGCAGGCGAAUGCCCCCAUUGAGUGUCCGAUGAUGAAUUUGGGUUGGGUUGUUUUAGAGAUUGUGUUGAUGAAUUGUGCGUAUGUGGGAAUGUUGAAUUCUUUGCCGCUACUUAGUCCGUGUGCUGGUGC…	.(((((....)))))(((.((((((.((((((.....(((..(((....((((((((...(((((((.....(((((...((((((..((((((........))))))))))))....((((((((..((......(((((....))))).......))..)))).))))((((((((.(((..(((.....(((((...(((((...(((.((((((((....(((((...(((.((((.((.((.(((((.((((.(((..........))))))).))))).))..)).))))))).)))))......)))))))).)))...))))))))))...........((((((((((((.....(((((............(((.((((((((....))…
THC0290_N_1361	Rfp84	1	2365864	2366006	143	antisense of THC0290_2036	-24.8	0.500845	-26.14	-18.7	0.11329	TCTCTTTTTTTCTTCGTTTGTTAAATTTGAACCCGACGGCAAACACAATCCGTTTGCAAACAATTGTTCTGAAACTTGGGTGCCATAATAAGGATAAGACTCGAAAACAGGTTGCAAGTGCATAGGTTTCCACAAAGGACGAC	UCUCUUUUUUUCUUCGUUUGUUAAAUUUGAACCCGACGGCAAACACAAUCCGUUUGCAAACAAUUGUUCUGAAACUUGGGUGCCAUAAUAAGGAUAAGACUCGAAAACAGGUUGCAAGUGCAUAGGUUUCCACAAAGGACGAC	..........((.((.(((((.......(((.((....(((....(((((.((((........(((((((......(((...))).....))))))).......)))).)))))....)))...)).))).))))).)).)).
THC0290_N_1373	Rfp85	1	2396881	2397005	125		-21.7	-0.300191	-24.12	-20.9	0.019708	GTTGCTAGCAATAATAATATACCTACCGAATATTAGAGTGTTTTTGAATAATGAATGTTGCTGTTTTAGCCCCGATTGAAGCGGAAAGCTACGAAGCGAAAAAAACTAATTTTTCTTGCAACAAC	GUUGCUAGCAAUAAUAAUAUACCUACCGAAUAUUAGAGUGUUUUUGAAUAAUGAAUGUUGCUGUUUUAGCCCCGAUUGAAGCGGAAAGCUACGAAGCGAAAAAAACUAAUUUUUCUUGCAACAAC	(((((.(((((((.....(((((((........))).))))..............)))))))((((((((.(((.......)))...)))..)))))((((((......))))))..)))))...
THC0290_N_1481	Rfp86	1	2617697	2617845	149	antisense of THC0290_2262	-30.8	-0.631361	-33.8	-24	0.00763951	CCAAACTGTTGGAAACCCTTGAACAGCAAAAGCTTGTTGCAATTGATTGTTTTGGTCTTTCAATTCGGTTGTTTGCTCTGTTCGTCTAGGGAAATCTAATTCGACTAAAACTACTTTTTCTTTGGCCCAGGCTTCAAATTCTGGAGTTT	CCAAACUGUUGGAAACCCUUGAACAGCAAAAGCUUGUUGCAAUUGAUUGUUUUGGUCUUUCAAUUCGGUUGUUUGCUCUGUUCGUCUAGGGAAAUCUAAUUCGACUAAAACUACUUUUUCUUUGGCCCAGGCUUCAAAUUCUGGAGUUU	.......((((((..(((((((((((....(((.....(((((((((((...........))).))))))))..))))))))))...))))...)))))).......................((((((((........))))).))).
THC0290_N_1573	Rfp87	-1	2762770	2763055	286	antisense of THC0290_2390;THC0290_N_1574	-45.5	0.963821	-52.09	-38.2	2.27646e-05	TCTAGTATCTATGTTTTTAAACGAGTAATGTTTTGTATAAATATGCAGCCTCTAGAACCCTCATGAGTAGGACTATTCCTTTTGTATGTTATAATTTCTAACAATTGCTCTACAATTATCTTAATTTAGCAAGTTTCTTTGCTTTTAATATTTCGGGTGTTTTTTTAGCAACAACATTGATATTAAAAAAGGCTTCAGCTATACATCGTCAAAATCTACAAAAATCTCGCTCGATGTTGGGTGTGCTTGGCAAGTAAGAATTAACCCTGCGGCAATTTCTTTTTCG	UCUAGUAUCUAUGUUUUUAAACGAGUAAUGUUUUGUAUAAAUAUGCAGCCUCUAGAACCCUCAUGAGUAGGACUAUUCCUUUUGUAUGUUAUAAUUUCUAACAAUUGCUCUACAAUUAUCUUAAUUUAGCAAGUUUCUUUGCUUUUAAUAUUUCGGGUGUUUUUUUAGCAACAACAUUGAUAUUAAAAAAGGCUUCAGCUAUACAUCGUCAAAAUCUACAAAAAUCUCGCUCGAUGUUGGGUGUGCUUGGCAAGUAAGAAUUAACCCUGCGGCAAUUUCUUUUUCG	..(((((((.(((((.......((((((((((...(((((.(((((((.(((..((....))..))).((((....)))).))))))))))))......))).))))))).................((((((....))))))..............((((.....))))..))))).)))))))....((((..((.(((.((((((.......................))))))))).)).)))).......(((((....((....))....))))).....
THC0290_N_1579	Rfp88	1	2766549	2766866	318	antisense of THC0290_2395;THC0290_N_1578	-62.6	-1.84506	-67.45	-42.43	0.000383458	TAAATATAATACATAATAAAGATGAAATCATTTTTTGAAGGAATACAATGGTTGTTTGACAATATTCTTTTAGCATCACACGAAGTTTTGCGCTCTTTAGAGCTTAGTAACTGGTGGTTGGCTAATCTTATTTCGTGGGCATTTATAATTATCTGTTCGTATTACATTTGGTATTGGATAAAACAATTAAAATCTCACAAAGAGAACAACGAAGAAAACCAAGATACTACGGCTCACTCATTTTTAAAGTAAGTCGAAACCAATATCTTTTCTAAAATAAATCTTATCAAAATGTAGCTTGTCTATGTTTTGATAAGA	UAAAUAUAAUACAUAAUAAAGAUGAAAUCAUUUUUUGAAGGAAUACAAUGGUUGUUUGACAAUAUUCUUUUAGCAUCACACGAAGUUUUGCGCUCUUUAGAGCUUAGUAACUGGUGGUUGGCUAAUCUUAUUUCGUGGGCAUUUAUAAUUAUCUGUUCGUAUUACAUUUGGUAUUGGAUAAAACAAUUAAAAUCUCACAAAGAGAACAACGAAGAAAACCAAGAUACUACGGCUCACUCAUUUUUAAAGUAAGUCGAAACCAAUAUCUUUUCUAAAAUAAAUCUUAUCAAAAUGUAGCUUGUCUAUGUUUUGAUAAGA	.((((.((((((.....(((((((....)))))))((((((((((...((.........)).))))))))))(((..((.....))..)))((((....))))(((((((((...)))).)))))...........(((((..((....))..))))))))))).))))((((((((...............((((.....))))........................(((((.(((.........))).)))))...))))))))..............((((((((((((((((.....))))))))))))))))
THC0290_N_1580	Rfp89	1	2767951	2768223	273	antisense of THC0290_2395	-47	0.744454	-53.45	-33.62	2.86339e-05	TGTTGCGTTCCAGCGTTTCCTGGAGCTACAAAAAGTTTCGAACATTTGTCAGATTGTAACATTTTCCAAGCCAGTGCATGTTCTCTTCCGCCAGATCCAAGTAGTAAAATTGTCATTGTTTGTGTTGTTAGTTTGTGGTGCAAAAATAGGCTCTTTTACCTTTCTTTAAAAGCGATTTAAAAAAAATAAATGCTTTATTATAAAATAAATAGAATTTTGAACTTATTATTATTTGGGCATTAGTAAGAGGATCGGAATTTTTCTTACAAACGA	UGUUGCGUUCCAGCGUUUCCUGGAGCUACAAAAAGUUUCGAACAUUUGUCAGAUUGUAACAUUUUCCAAGCCAGUGCAUGUUCUCUUCCGCCAGAUCCAAGUAGUAAAAUUGUCAUUGUUUGUGUUGUUAGUUUGUGGUGCAAAAAUAGGCUCUUUUACCUUUCUUUAAAAGCGAUUUAAAAAAAAUAAAUGCUUUAUUAUAAAAUAAAUAGAAUUUUGAACUUAUUAUUAUUUGGGCAUUAGUAAGAGGAUCGGAAUUUUUCUUACAAACGA	(((...(((((((......))))))).)))((((((((((((((.((....)).))).........((.((....)).))(((((((........((((((((((((.....(((..((((...((((((((((((.........)))))))................(((((.(((((.......)))))))))).......)))))...))))..))).....)))))))))))).......))))))))))))))))))...........
