# Supplementary material for: Transcriptome architecture and regulation at environmental transitions in flavobacteria: the case of an important fish pathogen
Source: ISME Commun. 2021 Jul 7;1:33. doi: 10.1038/s43705-021-00029-9 (PMC9723704; doi:10.1038/s43705-021-00029-9)
Supplement: Supplementary file 10 — Table S9 [file 43705_2021_29_MOESM10_ESM.xlsx]

## Sheet: Legend
Table S9: CopraRNA and IntaRNA target predictions for a selection of 9 putative regulatory small RNAs identified in the transcriptome of F. psychrophilum OSU THCO2-90.
Columns	Description
INPUT_sequence	List of sRNA homologs used as input for CopraRNA analysis. Homologs were retrieved from other genomes by blastn using the nucleotide sequence of the 'indep' TR in strain OSU THCO2-90 was used to search for homologs using blastn in 64 selected genomes representative of the F. psychrophilum species (13), genus (41), family (8) and phylum (2). Positive hits were selected for CopraRNA analysis. Genom…
Genome_blastn_eval	Name of the strain with a positive hit and corresponding blastn e-value.
OUTPUT	Description of CopraRNA output is available at http://rna.informatik.uni-freiburg.de/Help.jsp?toolName=CopraRNA#output.
Rank	Rank number when the list of putative targets is sorted based on CopraRNA p-value.
Locus Tag	Locustag of the gene retrieved from RefSeq NC_009613 (strain JIP 02/86).
Gene Name	Gene name according to RefSeq NC_009613 (strain JIP 02/86).
Energy [kcal/mol]	IntaRNA energy of the best mRNA-sRNA interaction.
Position mRNA	The positions of the interactions are not relative to start or stop codon, but rather absolute positions with respect to the lengths of the sRNA/mRNA sequence. As we extracted sequences 200 upstream and 100 downstream of the start codon, the location of the start codon is 201,202,203.
Annotation (strain JIP02/86)	Annotation of the gene retrieved from RefSeq NC_009613 (strain JIP 02/86).
Additional homologs	In some cases, genes from the same organism can be part of the same cluster of targets. In these cases only the sequence with the best IntaRNA energy score participates in the calculation of the CopraRNA p-value. To secure that no potential targets are lost because of this, the additional homologs are added for the organism of interest.
CopraRNA versus IntaRNA
The use of three sRNA homologs with some degree of divergence is mandatory for CopraRNA tool (Wright et al NAR 2014 Jul 1; 42: W119-W123; doi: 10.1093/nar/gku359).
Sequence alignment of positive hits using blastn was produced using Multalin tool using default parameters (http://multalin.toulouse.inra.fr/multalin/multalin.html).
If more than 3 different sequences were found, the list of putative sRNA targets was ranked based on CopraRNA p-value (orange colored sheets). Else, the list was ranked based on IntaRNA p-value (purple colored sheets).

## Sheet: Rfp11
Locustag=THC0290_N_0107
Name=Rfp11
			OUTPUT
INPUT_sequence	Genome_blastn_eval		Rank	CopraRNA p-value	CopraRNA fdr value	Locus Tag	Gene Name	Energy [kcal/mol]	IntaRNA p-value	Position mRNA	Position sRNA	Annotation (strain JIP02/86)	Additional homologs
>NC_009613	Flavobacterium psychrophilum JIP02/86 strain=JIP02/86 eval=1.34e-36		3	3.44e-06	0.002649	fp2451	N/A	-11.48	0.035278	57 -- 93	1 -- 36	Probable polysaccharide biosynthesis protein
TGAGTTAGTTAAGTGAATTTAAAATGATTTTGTTTTGCATTTAAAAAAAAGGCGTTCATGAAATTATTTCTTGAACGCCTTTTGAAATTTATAGGATAAT			4	2.344e-05	0.01354	fp0255	N/A	-11.89	0.028196	77 -- 112	1 -- 38	Homoserine dehydrogenase
TTTTTAGT			5	0.0002245	0.09025	fp1308	gltA	-19.75	0.000368	76 -- 124	1 -- 44	Citrate (Si)-synthase
>NC_009441	Flavobacterium johnsoniae UW101 strain=UW101; ATCC 17061 eval=8.75e-05		6	0.0002344	0.09025	fp1953	N/A	-15.08	0.004773	193 -- 218	23 -- 46
AAGCGAGTTTATAATCGTAAGTTTGTAATTTGATTAAATGAAAAAGGCTTTCTAGGAATTTATTTCAGAAAGCCTTTTTTAATTT			7	0.0004288	0.1287	fp0880	N/A	-13.04	0.014858	201 -- 243	1 -- 40	Probable multidrug resistance protein. AcrB/AcrD/AcrF family protein
>NC_016001	Flavobacterium branchiophilum FL-15 strain=FL-15 eval=2.35e-04		8	0.0004457	0.1287	fp2137	N/A	-8.43	0.185209	17 -- 33	2 -- 17	Probable modification methyltransferase	fp2147
AAATAACTTTTATATTTGCAAATTCATAAAAATGAGTCCATGAAATTATTTATTGAAAAAGTTCTGTTGTATTTAGGTCTATTTTT			9	0.0006424	0.1515	fp1972	gldL	-12.83	0.016646	139 -- 189	5 -- 38	Gliding motility transmembrane protein GldL
>NZ_CP007627	Flavobacterium psychrophilum strain=CSF259-93 eval=1.34e-36		10	0.0006558	0.1515	fp1469	lipA	-8.16	0.212784	163 -- 177	93 -- 107	Lipoyl synthase
TGAGTTAGTTAAGTGAATTTAAAATGATTTTGTTTTGCATTTAAAAAAAAGGCGTTCATGAAATTATTTCTTGAACGCCTTTTGAAATTTATAGGATAAT			11	0.0009557	0.2007	fp1249	N/A	-15.2	0.004465	258 -- 286	7 -- 41	Probable methyltransferase
TTTTTAGT			12	0.001181	0.2273	fp1503	N/A	-16.91	0.00173	199 -- 243	1 -- 42
>NZ_CP008902	Flavobacterium psychrophilum strain=950106-1/1 eval=1.34e-36		13	0.00165	0.2761	fp1775	trmU	-16.35	0.002364	39 -- 77	3 -- 41	tRNA (5-methylaminomethyl-2-thiouridylate)-methyltransferase
TGAGTTAGTTAAGTGAATTTAAAATGATTTTGTTTTGCATTTAAAAAAAAGGCGTTCATGAAATTATTTCTTGAACGCCTTTTGAAATTTATAGGATAAT			14	0.001673	0.2761	fp1867	N/A	-11.89	0.028063	168 -- 180	1 -- 14	Probable tRNA/rRNA methyltransferase
TTTTTAGT			15	0.001965	0.3026	fp0147	prsA	-12.1	0.025053	159 -- 187	1 -- 38	Ribose-phosphate diphosphokinase
>NZ_CP015107	Flavobacterium columnare strain=C#2 eval=6.34e-04		16	0.002262	0.3066	fp1999	N/A	-9.99	0.080382	18 -- 33	27 -- 42
TTTAGATGTGTATCTTATAAAAAAAGTTGCGCAAATGTAAATATTTTGCACAACTTTTTTTATAGGTTAATTTTTTA			17	0.002345	0.3066	fp1801	N/A	-6.68	0.430833	50 -- 64	92 -- 106
			18	0.002446	0.3066	fp1378	N/A	-7.69	0.269405	165 -- 177	94 -- 106	Probable ABC-type transport system permease component
Sequence alignment was produced using Multalin tool using default parameters (http://multalin.toulouse.inra.fr/multalin/multalin.html).			19	0.002722	0.3066	fp1988	carB	-8.55	0.174131	181 -- 194	1 -- 15	Carbamoyl-phosphate synthase large subunit
			20	0.002911	0.3066	fp2120	gcvH	-8.53	0.175644	190 -- 221	1 -- 43	Glycine cleavage system H protein
			21	0.003023	0.3066	fp0642	fdx1	-13.3	0.012834	1 -- 67	1 -- 40	Ferredoxin
			22	0.003099	0.3066	fp0217	ileS	-13.06	0.014633	184 -- 234	1 -- 45	Isoleucine--tRNA ligase
			23	0.003408	0.3066	fp0677	N/A	-11.69	0.031486	164 -- 199	4 -- 43	Probable lipoprotein precursor
			24	0.00355	0.3066	fp1823	N/A	-15.06	0.004829	184 -- 237	1 -- 39	Probable lipoprotein precursor
			25	0.003567	0.3066	fp1735	lpdA1	-10.11	0.075262	183 -- 222	1 -- 36	Dihydrolipoyl dehydrogenase
			26	0.003751	0.3066	fp1052	N/A	-13.41	0.012036	4 -- 17	88 -- 101	Hypothetical protein
			27	0.003816	0.3066	fp1486	N/A	-11.88	0.028214	201 -- 237	2 -- 40
			28	0.003977	0.3066	fp2116	N/A	-14.87	0.005368	4 -- 29	4 -- 38	Probable membrane fusion efflux protein
			29	0.004018	0.3066	fp0465	N/A	-10.42	0.063459	105 -- 129	8 -- 32	Probable transmembrane protein of unknown function
			30	0.004059	0.3066	fp1765	clpB	-8.42	0.186316	157 -- 173	3 -- 18	ATPase with chaperone activity ATP-binding subunit
The use of three sRNA homologs with some degree of divergence is mandatory for CopraRNA tool.			31	0.004114	0.3066	fp0618	N/A	-13.31	0.012724	251 -- 287	3 -- 37	Probable transmembrane protein of unknown function
If this criteria is true, the list of putative sRNA targets is ranked based on CopraRNA p-value. If not, the list is ranked based on IntaRNA p-value.			32	0.004372	0.308	fp1682	N/A	-12.83	0.016661	169 -- 198	5 -- 36	Probable transmembrane protein of unknown function
			33	0.004552	0.308	fp0645	N/A	-14.64	0.006089	177 -- 230	2 -- 38	Probable TonB-dependent outer membrane siderophore receptor precursor
			34	0.004597	0.308	fp0873	prfB	-8.14	0.215754	57 -- 66	32 -- 41	Peptide chain release factor 2 (RF-2)
			35	0.004836	0.308	fp1623	ddpX	-11.16	0.042293	266 -- 283	25 -- 42	D-alanyl-D-alanine dipeptidase
			36	0.004842	0.308	fp2247	trpS	-6.96	0.381377	88 -- 101	93 -- 106	Tryptophan--tRNA ligase
			37	0.004937	0.308	fp2550	N/A	-14.5	0.006567	201 -- 215	26 -- 40	Probable transposase	fp2585
			38	0.005109	0.308	fp1884	smpB	-8.52	0.177257	139 -- 171	11 -- 39	SsrA-binding protein
			39	0.005378	0.308	fp2171	N/A	-10.61	0.057392	267 -- 298	6 -- 44
			40	0.005486	0.308	fp0479	menA	-8.9	0.144952	278 -- 293	1 -- 15	1 4-dihydroxy-2-naphthoate octaprenyltransferase
			41	0.005557	0.308	fp0965	N/A	-11.69	0.031428	122 -- 153	2 -- 32	Probable DNA polymerase III subunit
			42	0.005653	0.308	fp1442	pyrR2	-8.57	0.172272	11 -- 35	1 -- 38	Bifunctional protein : pyrimidine operon regulatory protein and uracil phosphoribosyltransferase
			43	0.005733	0.308	fp0346	yfiC	-8.18	0.210915	288 -- 296	87 -- 95	Protein of unknown function YfiC
			44	0.006359	0.3285	fp1744	N/A	-14.08	0.008319	209 -- 242	3 -- 39	Protein of unknown function precursor
			45	0.006418	0.3285	fp0704	N/A	-7.36	0.316958	21 -- 42	84 -- 105	Protein of unknown function precursor
			46	0.007052	0.3285	fp0487	N/A	-7.28	0.328507	269 -- 283	4 -- 18	Putative mobilization protein TraG family
			47	0.007157	0.3285	fp0681	glyA	-12.44	0.020713	236 -- 266	6 -- 39	Glycine hydroxymethyltransferase
			48	0.007247	0.3285	fp1736	sodC	-11.76	0.03029	185 -- 231	2 -- 37	Superoxide dismutase [Cu-Zn]
			49	0.00734	0.3285	fp0503	N/A	-7.88	0.245142	142 -- 172	8 -- 39	Probable membrane fusion efflux protein
			50	0.007447	0.3285	fp0520	N/A	-8.02	0.229009	200 -- 233	2 -- 41	TPR-domain containing protein
			51	0.007757	0.3285	fp0715	N/A	-13.74	0.010014	199 -- 233	4 -- 42	Two-component system response regulatory protein LuxR family
			52	0.007785	0.3285	fp2385	N/A	-13.74	0.010048	199 -- 214	27 -- 42
			53	0.007845	0.3285	fp0563	N/A	-13.72	0.01012	157 -- 187	5 -- 36
			54	0.007902	0.3285	fp1859	N/A	-13.71	0.010189	126 -- 155	1 -- 29
			55	0.00818	0.3285	fp1201	lipB	-8.11	0.218729	49 -- 89	1 -- 38	Lipoyl(octanoyl) transferase
			56	0.008262	0.3285	fp1509	htpG	-6.94	0.384136	252 -- 265	90 -- 105	Chaperone protein HtpG
			57	0.008719	0.3285	fp1897	osmC	-8.6	0.170117	34 -- 47	1 -- 16	Putative stress-induced protein OsmC
			58	0.008768	0.3285	fp2092	N/A	-9.45	0.107745	1 -- 36	4 -- 38
			59	0.008939	0.3285	fp0233	ribF	-9.89	0.084832	228 -- 258	2 -- 45	Bifunctional riboflavin biosynthesis protein RibF : Riboflavin kinase and FMN adenylyltransferase
			60	0.009208	0.3285	fp0371	N/A	-6.42	0.480424	52 -- 65	2 -- 15	Protein of unknown function precursor
			61	0.009235	0.3285	fp1069	N/A	-9.76	0.091468	187 -- 226	1 -- 37	Probable transmembrane protein of unknown function
			62	0.009358	0.3285	fp0534	nusB	-13.43	0.011932	21 -- 40	1 -- 21	N utilization substance protein B homolog (NusB protein)
			63	0.009462	0.3285	fp0350	N/A	-11.3	0.039135	114 -- 159	4 -- 39
			64	0.009554	0.3285	fp1058	N/A	-11.22	0.040921	190 -- 212	87 -- 108
			65	0.009564	0.3285	fp2310	N/A	-13.39	0.012177	5 -- 44	4 -- 38	Protein of unknown function precursor; putative adhesin
			66	0.009564	0.3285	fp2310	N/A	-13.39	0.012177	5 -- 44	4 -- 38	Protein of unknown function precursor; putative adhesin
			67	0.009652	0.3285	fp1414	N/A	-9.44	0.108572	151 -- 164	24 -- 37
			68	0.009783	0.3285	fp0608	N/A	-11.09	0.04399	150 -- 164	24 -- 38	Probable superoxide dismutase
			69	0.009814	0.3285	fp1278	N/A	-5.86	0.598156	135 -- 147	94 -- 106	Probable aminotransferase
			70	0.01031	0.3304	fp0967	N/A	-13.27	0.013059	25 -- 43	4 -- 23	Hypothetical protein
			71	0.01031	0.3304	fp1403	N/A	-10.31	0.067449	216 -- 245	12 -- 44
			72	0.01041	0.3304	fp0954	hisF	-7.72	0.265942	14 -- 57	1 -- 45	Imidazole glycerol phosphate synthase subunit HisF
			73	0.01044	0.3304	fp1349	N/A	-13.29	0.012903	216 -- 259	1 -- 38	Putative AAA family ATPase
			74	0.01082	0.3335	fp1707	aroB	-13.18	0.013668	4 -- 50	1 -- 38	3-dehydroquinate synthase
			75	0.01094	0.3335	fp2067	engB	-13.17	0.013802	129 -- 159	3 -- 36	Probable GTP-binding protein EngB
			76	0.011	0.3335	fp1746	N/A	-7.89	0.244736	200 -- 234	1 -- 41	TatD-related DNase
			77	0.01117	0.3335	fp0381	N/A	-13.13	0.014077	133 -- 171	1 -- 38	Probable transmembrane protein of unknown function
			78	0.01139	0.3335	fp1862	N/A	-11.85	0.028798	163 -- 191	4 -- 33	Glycosyl transferase group 2 family protein
			79	0.01163	0.3335	fp0891	N/A	-8.97	0.139379	199 -- 232	8 -- 42	Peptidase M16 family
			80	0.01168	0.3335	fp0370	ogt2	-7.48	0.298959	168 -- 196	13 -- 37	Methylated-DNA--[protein]-cysteine S-methyltransferase
			81	0.0118	0.3335	fp0195	N/A	-8.98	0.138667	260 -- 299	4 -- 39	Adenylate cyclase family protein
			82	0.01208	0.3335	fp2093	ppnK	-5.4	0.695223	5 -- 14	94 -- 103	NAD(+) kinase
			83	0.0123	0.3335	fp1189	xerC	-12.97	0.015405	201 -- 240	1 -- 40	Tyrosine recombinase XerC
			84	0.0124	0.3335	fp0706	lpdA2	-10.37	0.065187	90 -- 122	1 -- 28	Dihydrolipoyl dehydrogenase
			85	0.01241	0.3335	fp1418	ccsBA	-8.89	0.14592	43 -- 54	5 -- 16	Probable cytochrome c-type biogenesis protein CcsBA
			86	0.0125	0.3335	fp0730	N/A	-12.81	0.016874	192 -- 243	7 -- 45
			87	0.01256	0.3335	fp1435	N/A	-11.05	0.04485	200 -- 229	2 -- 41	Probable secreted exopolyphosphatase precursor	fp0437
			88	0.01323	0.339	fp0205	N/A	-7.34	0.319316	267 -- 280	26 -- 38
			89	0.01339	0.339	fp0388	N/A	-12.83	0.016677	80 -- 118	4 -- 42	Hypothetical protein
			90	0.01347	0.339	fp1838	N/A	-7.06	0.364083	189 -- 225	2 -- 37
			91	0.01357	0.339	fp0314	N/A	-12.81	0.01688	198 -- 232	8 -- 43	Prenyltransferase family protein
			92	0.01377	0.339	fp0281	N/A	-8.27	0.201433	81 -- 96	24 -- 39	Probable M36 fungalysin family metalloprotease precursor	fp0280 fp0087
			93	0.01384	0.339	fp0092	sdhC	-12.65	0.018392	97 -- 122	3 -- 26	Succinate dehydrogenase cytochrome b subunit
			94	0.01395	0.339	fp0749	N/A	-6.29	0.506361	202 -- 224	23 -- 43	Protein of unknown function precursor
			95	0.01399	0.339	fp1041	pheT	-11.78	0.029934	45 -- 84	1 -- 38	Phenylalanine--tRNA ligase beta subunit
			96	0.01409	0.339	fp0732	N/A	-8.85	0.148943	223 -- 265	2 -- 39
			97	0.01466	0.3422	fp2087	N/A	-9.88	0.085441	192 -- 230	1 -- 37	Probable transmembrane protein of unknown function
			98	0.01468	0.3422	fp1650	N/A	-8.29	0.199484	225 -- 253	1 -- 37
			99	0.01498	0.3422	fp0052	plsC	-8.04	0.226892	209 -- 226	91 -- 108	1-acylglycerol-3-phosphate O-acyltransferase
			100	0.01526	0.3422	fp1628	dapD	-9.3	0.117317	272 -- 300	13 -- 42	2 3 4 5-tetrahydropyridine-2 6-dicarboxylate N-succinyltransferase
			101	0.01535	0.3422	fp0102	N/A	-7.66	0.274098	112 -- 144	4 -- 38	Putative plasmid stabilization system protein
			102	0.01541	0.3422	fp1944	N/A	-11.77	0.030041	100 -- 130	4 -- 38	LemA family protein
			103	0.01549	0.3422	fp1225	N/A	-9.1	0.130236	198 -- 229	83 -- 108	Protein of unknown function precursor
			104	0.01562	0.3422	fp1199	N/A	-12.57	0.019259	154 -- 188	1 -- 31	Probable outer membrane protein precursor Omp121 family
			105	0.01569	0.3422	fp1149	N/A	-7.8	0.255763	196 -- 229	1 -- 38	Rhomboid family protein
			106	0.0157	0.3422	fp1957	hutU	-12.56	0.019348	41 -- 70	4 -- 26	Urocanate hydratase
			107	0.01608	0.3443	fp0979	N/A	-8.46	0.18257	218 -- 242	90 -- 108	Probable phosphohydrolase
			108	0.0161	0.3443	fp2450	dut	-7.21	0.339848	199 -- 214	27 -- 42	dUTP diphosphatase
			109	0.01625	0.3443	fp1866	relA	-12.47	0.020318	136 -- 179	2 -- 36	GTP diphosphokinase
			110	0.01641	0.3446	fp2245	recA	-7.48	0.298426	107 -- 123	1 -- 15	Recombinase A
			111	0.0167	0.3454	fp1780	hutI	-10.13	0.074503	184 -- 199	90 -- 106	Imidazolonepropionase
			112	0.017	0.3454	fp2234	pbpC	-12.43	0.020835	257 -- 283	13 -- 37	Membrane carboxypeptidase/penicillin-binding protein PbpC
			113	0.01704	0.3454	fp1952	N/A	-12.42	0.020882	28 -- 42	89 -- 103
			114	0.01738	0.3454	fp1840	N/A	-11.21	0.041008	264 -- 282	83 -- 101	Protein of unknown function precursor
			115	0.01754	0.3454	fp1119	udk	-11.22	0.040924	223 -- 236	25 -- 38	Uridine kinase
			116	0.01757	0.3454	fp1858	yjeB	-9.95	0.082315	184 -- 226	2 -- 45	Protein of unknown function YjeB
			117	0.01762	0.3454	fp0421	N/A	-8.05	0.224821	173 -- 186	1 -- 15	Probable ABC-type transport system membrane fusion efflux protein component
			118	0.01783	0.3454	fp1971	gldM	-9.48	0.106194	166 -- 182	4 -- 21	Gliding motility transmembrane protein GldM
			119	0.01784	0.3454	fp1771	argD	-7.55	0.288262	31 -- 47	26 -- 42	Acetylornithine/succinyldiaminopimelate transaminase
			120	0.01828	0.3454	fp2048	rpoD	-7.99	0.231993	45 -- 75	1 -- 39	RNA polymerase sigma-70 factor RpoD
			121	0.01858	0.3454	fp2095	uppS	-9.3	0.117203	143 -- 157	1 -- 14	Di-trans poly-cis-decaprenylcistransferase
			122	0.01868	0.3454	fp1456	N/A	-12.27	0.022756	80 -- 118	1 -- 38	Probable lipoprotein precursor
			123	0.01901	0.3454	fp1657	N/A	-12.24	0.023135	253 -- 272	1 -- 20		fp0094 fp1724
			124	0.01911	0.3454	fp0426	N/A	-9.2	0.123257	46 -- 53	1 -- 8	Cation-transporting ATPase P-type
			125	0.01924	0.3454	fp0892	rplT	-12.22	0.023389	201 -- 229	5 -- 40	50S ribosomal protein L20
			126	0.01952	0.3454	fp1661	N/A	-7.1	0.357652	198 -- 223	84 -- 108	Protein of unknown function precursor; putative adhesin
			127	0.0197	0.3454	fp1337	rplW	-12.18	0.023915	93 -- 104	1 -- 12	50S ribosomal protein L23
			128	0.0198	0.3454	fp1217	gapA2	-10.17	0.072818	163 -- 197	5 -- 39	Glyceraldehyde-3-phosphate dehydrogenase (phosphorylating)
			129	0.01989	0.3454	fp1089	gldF	-6.53	0.458652	89 -- 101	96 -- 108	Gliding motility transmembrane protein GldF
			130	0.01989	0.3454	fp2019	fspA	-7.11	0.356422	74 -- 100	8 -- 28	Flavobacterial-specific protein antigen FspA precursor
			131	0.01992	0.3454	fp2101	N/A	-8.32	0.196149	187 -- 210	83 -- 105	Protein of unknown function precursor
			132	0.01993	0.3454	fp0268	metK	-9.99	0.08031	153 -- 186	2 -- 39	Methionine adenosyltransferase
			133	0.01997	0.3454	fp0204	pykA	-9.27	0.119119	154 -- 176	25 -- 43	Pyruvate kinase
			134	0.02004	0.3454	fp0751	N/A	-8.52	0.176633	253 -- 300	2 -- 39	Probable transmembrane protein of unknown function
			135	0.02028	0.347	fp1658	N/A	-8.93	0.142633	50 -- 78	8 -- 37
			136	0.02069	0.3471	fp1595	N/A	-9.88	0.085387	51 -- 83	6 -- 38	Probable transcriptional regulator ArsR family
			137	0.02071	0.3471	fp1921	prfA	-4.71	0.831836	14 -- 28	94 -- 108	Peptide chain release factor 1 (RF-1)
			138	0.02074	0.3471	fp2110	N/A	-12.09	0.025095	263 -- 296	1 -- 39
			139	0.02114	0.3471	fp1510	N/A	-7.62	0.2794	145 -- 178	4 -- 44	Probable TonB-dependent outer membrane receptor precursor
			140	0.02115	0.3471	fp2429	glyS	-11.23	0.040675	121 -- 139	89 -- 108	Glycine--tRNA ligase
			141	0.02119	0.3471	fp0909	N/A	-7.94	0.237835	71 -- 107	5 -- 41	Probable lipoprotein precursor
			142	0.02152	0.3502	fp1228	mscS3	-4.05	0.928198	274 -- 281	3 -- 10	Probable small-conductance mechanosensitive ion channel MscS3
			143	0.02169	0.3504	fp1768	rlmF	-9.18	0.124682	119 -- 181	2 -- 44	Ribosomal RNA large subunit methyltransferase F
			144	0.02186	0.3507	fp2405	N/A	-12.01	0.026363	199 -- 231	1 -- 42	Polyprenyl synthetase
			145	0.02255	0.3593	fp1071	N/A	-8.23	0.206089	171 -- 204	1 -- 35		fp2189
			146	0.02288	0.3621	fp0038	N/A	-11.93	0.027511	203 -- 236	2 -- 34	Protein of unknown function precursor
			147	0.0232	0.3636	fp0880	N/A	-13.04	0.014858	201 -- 243	1 -- 40	Probable multidrug resistance protein. AcrB/AcrD/AcrF family protein
			148	0.02343	0.3636	fp0711	N/A	-11.89	0.028126	170 -- 210	2 -- 38	Probable lipoprotein precursor
			149	0.02365	0.3636	fp0984	N/A	-7.35	0.318249	65 -- 78	83 -- 99	Probable transcriptional regulator AraC family
			150	0.02397	0.3636	fp1901	N/A	-10.54	0.059544	174 -- 202	13 -- 41	Protein of unknown function precursor
			151	0.02418	0.3636	fp0384	N/A	-8.86	0.148353	13 -- 55	1 -- 37
			152	0.02435	0.3636	fp0018	pgk	-9	0.137737	189 -- 226	2 -- 37	Phosphoglycerate kinase
			153	0.02446	0.3636	fp2124	N/A	-11.77	0.030131	110 -- 150	1 -- 40	Putative 4Fe-4S binding protein
			154	0.02467	0.3636	fp0024	gldH	-8.6	0.169869	67 -- 86	92 -- 108	Gliding motility lipoprotein precursor GldH
			155	0.02469	0.3636	fp1004	N/A	-7.31	0.323898	247 -- 257	3 -- 15	Probable M1 family metalloprotease precursor
			156	0.02491	0.3636	fp2472	N/A	-8.57	0.172354	30 -- 70	6 -- 43	Probable transmembrane protein of unknown function
			157	0.02507	0.3636	fp1431	N/A	-11.12	0.04324	238 -- 251	94 -- 107	Hypothetical protein
			158	0.02508	0.3636	fp2261	N/A	-11.66	0.03195	116 -- 152	8 -- 44
			159	0.02513	0.3636	fp2244	N/A	-7.52	0.293599	240 -- 254	1 -- 16	Protein of unknown function precursor; putative adhesin	fp1959
			160	0.02532	0.3636	fp1303	N/A	-8.67	0.163571	198 -- 221	10 -- 36	MarC family integral membrane protein
			161	0.02553	0.3636	fp1993	N/A	-6.58	0.44993	220 -- 251	13 -- 42	Pseudouridylate synthase
			162	0.02584	0.3636	fp1908	ppiC	-10.68	0.054923	200 -- 238	5 -- 41	Probable peptidyl-prolyl cis-trans isomerase PpiC
			163	0.02586	0.3636	fp1936	N/A	-7.66	0.273576	255 -- 270	92 -- 108
			164	0.02598	0.3636	fp1841	recN	-11.41	0.036684	112 -- 143	8 -- 43	DNA repair protein recN
			165	0.02625	0.3636	fp1404	N/A	-8.07	0.222811	275 -- 296	87 -- 107	Protein of unknown function precursor
			166	0.02627	0.3636	fp0303	N/A	-8.7	0.161062	4 -- 28	89 -- 107	Protein of unknown function precursor
			167	0.02629	0.3636	fp2505	N/A	-11.7	0.03132	2 -- 15	88 -- 101	Hypothetical protein
			168	0.02665	0.3664	fp0415	pruA	-11.79	0.029788	66 -- 79	92 -- 105	1-pyrroline-5-carboxylate dehydrogenase
			169	0.02692	0.3677	fp2119	fjo27	-10.37	0.065453	221 -- 258	9 -- 42	Probable transmembrane protein of unknown function Fjo27
			170	0.02706	0.3677	fp0961	N/A	-11.65	0.032179	23 -- 54	4 -- 38	Probable transmembrane protein of unknown function
			171	0.0274	0.3697	fp1782	ftnA	-9.85	0.086759	131 -- 156	5 -- 29	Ferritin
			172	0.02753	0.3697	fp1223	N/A	-8.43	0.185827	97 -- 122	13 -- 43	Probable ion transporter
			173	0.02774	0.3704	fp1178	rplJ	-11.89	0.028176	66 -- 84	23 -- 42	50S ribosomal protein L10
			174	0.02798	0.3713	fp1934	N/A	-8.09	0.220941	138 -- 155	89 -- 107	Probable acyltransferase
			175	0.02816	0.3713	fp2493	folB	-6.11	0.543631	265 -- 278	25 -- 38	Dihydroneopterin aldolase
			176	0.02829	0.3713	fp2211	N/A	-6.45	0.475931	59 -- 79	17 -- 36
			177	0.02861	0.3714	fp2017	N/A	-8.79	0.15367	205 -- 218	92 -- 105	Putative outer membrane protein precursor
			178	0.02862	0.3714	fp0725	N/A	-6.97	0.378944	150 -- 177	2 -- 40	Putative sugar phosphate isomerase
			179	0.02899	0.3738	fp1720	fadD	-10.29	0.068424	110 -- 131	2 -- 21	Long-chain-fatty-acid--CoA ligase
			180	0.02912	0.3738	fp2357	truB	-8.99	0.137949	194 -- 207	2 -- 16	tRNA pseudouridine synthase B
			181	0.02956	0.3773	fp0770	N/A	-11.5	0.034957	143 -- 174	4 -- 38	Probable acetyl-CoA acetyltransferase
			182	0.02983	0.3786	fp0675	N/A	-8.29	0.199063	184 -- 205	88 -- 108	Probable transcriptional regulator PadR family
			183	0.03156	0.3801	fp0053	yqiW	-5.3	0.71625	83 -- 103	88 -- 106	Protein of unknown function YqiW
			184	0.03185	0.3801	fp2055	ftsQ	-11.37	0.037483	14 -- 33	88 -- 108	Cell division protein FtsQ
			185	0.0319	0.3801	fp0355	N/A	-6.88	0.395554	3 -- 38	4 -- 38	Protein of unknown function precursor
			186	0.03201	0.3801	fp2253	N/A	-10.56	0.058725	276 -- 297	13 -- 38	Probable coenzyme F390 synthetase
			187	0.03201	0.3801	fp0653	ddl	-9.11	0.129768	72 -- 107	1 -- 43	D-alanine--D-alanine ligase
			188	0.03206	0.3801	fp1496	N/A	-11.37	0.03759	72 -- 112	6 -- 42	Protein of unknown function precursor
			189	0.03218	0.3801	fp2383	ribE	-6.77	0.415336	99 -- 107	88 -- 96	Riboflavin synthase alpha subunit
			190	0.03265	0.3801	fp1452	N/A	-11.33	0.038362	76 -- 109	10 -- 38	Probable lipoprotein precursor
			191	0.03286	0.3801	fp1438	N/A	-9.58	0.100623	55 -- 78	4 -- 42	Probable DNA polymerase III subunit
			192	0.03286	0.3801	fp2459	atpH	-10.27	0.069101	109 -- 122	95 -- 108	ATP synthase delta subunit
			193	0.03291	0.3801	fp1796	pyrR1	-13.54	0.01122	1 -- 44	1 -- 38	Bifunctional protein : pyrimidine operon regulatory protein and uracil phosphoribosyltransferase
			194	0.03325	0.3801	fp1793	rpsA	-11.3	0.039022	125 -- 162	9 -- 46	30S ribosomal protein S1
			195	0.03334	0.3801	fp1360	hpt	-10.3	0.067967	112 -- 158	1 -- 38	Hypoxanthine phosphoribosyltransferase
			196	0.03374	0.3801	fp1604	N/A	-12.72	0.017674	80 -- 121	2 -- 44	Probable TonB-dependent outer membrane receptor precursor
			197	0.0339	0.3801	fp2347	mtgA	-11.27	0.03973	271 -- 294	14 -- 38	Monofunctional biosynthetic peptidoglycan transglycosylase
			198	0.03404	0.3801	fp2417	mreB	-5.37	0.702909	257 -- 271	1 -- 15	Rod shape-determining protein MreB
			199	0.03418	0.3801	fp2066	pcbD	-11.26	0.040043	71 -- 112	4 -- 42	Probable 2-hydroxy-6-oxo-6-phenylhexa-2 4-dienoic acid hydrolase
			200	0.03436	0.3801	fp2314	N/A	-7.81	0.254704	107 -- 117	28 -- 38

## Sheet: Rfp13
Locustag=THC0290_N_0129
Name=Rfp13			OUTPUT
INPUT_sequence	Genome_blastn_eval		Rank	CopraRNA p-value	CopraRNA fdr value	Locus Tag	Gene Name	Energy [kcal/mol]	IntaRNA p-value	Position mRNA	Position sRNA	Annotation (strain JIP02/86)	Additional homologs
>NC_009441	Flavobacterium johnsoniae UW101 strain=UW101; ATCC 17061 eval=1.98e-13		1	6.051e-06	0.01405	fp0013	remG	-12.04	0.047313	170 -- 195	12 -- 37	Gliding motility protein RemG precursor
CCATAACATTAGTAGGTTAAGTTTATGGTAGATTTGGGGCAAAAAAGGTGGAAGAAATTCCGCCTTTTTT			2	1.355e-05	0.01573	fp0347	gcdH	-11.27	0.069501	77 -- 88	29 -- 39	Glutaryl-CoA dehydrogenase
>NC_009613	Flavobacterium psychrophilum JIP02/86 strain=JIP02/86 eval=2.55e-23		3	2.93e-05	0.01798	fp1569	N/A	-10.13	0.119591	25 -- 49	14 -- 37
CCATTACATAAGTAGGTTAAGTTATGGTAGATTTGGGGCAAAAAAGGCGGAACTTAATAATTCCGCCTTTTTT			4	3.097e-05	0.01798	fp0006	N/A	-10.46	0.102567	217 -- 239	12 -- 38	Protein of unknown function precursor; putative adhesin	fp1830 fp0016
>NC_014934	Cellulophaga algicola DSM 14237 strain=DSM 14237 eval=1.04e-11		5	4.105e-05	0.01906	fp2519	N/A	-7.35	0.368157	1 -- 26	11 -- 37	Protein of unknown function precursor; putative adhesin	fp2513
CCATAGCATAAGTAGGTTAAGTTCATGGTAAGATTTGGGGGAAAAAGGCGGAATAATATTCCGCCTTTTT			6	8.139e-05	0.0315	fp1208	dnaA	-13.88	0.017555	133 -- 159	8 -- 37	Chromosomal replication initiator protein DnaA
>NC_016510	Flavobacterium columnare ATCC 49512 strain=ATCC 49512 eval=3.85e-12		7	0.0001031	0.03419	fp0280	N/A	-13.92	0.017214	258 -- 284	12 -- 39	Probable M36 fungalysin family metalloprotease precursor	fp0281 fp0087
CCATTACAATAAGTAGGTTAAGTTTATGGTAGATTTGGGGCAAAAAAGACAGAACTAAGTTCTGTCTTTTTT			8	0.0001257	0.03648	fp0617	N/A	-10.33	0.109208	172 -- 187	13 -- 35
>NC_016001	Flavobacterium branchiophilum FL-15 strain=FL-15 eval=1.06e-08		9	0.000176	0.03684	fp2494	glnS	-20.59	0.000182	1 -- 24	15 -- 36	Glutamine--tRNA ligase
CATAAAATAGTAGGTTAAATTTATGGTAGATTTGGGGCAAAAAAGGTGGATTCATTCCACCTTTTTT			10	0.0001912	0.03684	fp2025	ribD	-9.37	0.167241	130 -- 156	15 -- 38	Riboflavin biosynthesis protein RibD
>NC_017025	Flavobacterium indicum GPTSA100-9 = DSM 17447 strain=GPTSA100-9 eval=5.56e-07		11	0.0002045	0.03684	fp2383	ribE	-15.91	0.005254	80 -- 116	12 -- 40	Riboflavin synthase alpha subunit
CCAGAAAATTAGTAGGTTAAGTTTTATGGTAGATTTGGGGCAAAAAGGGTGAACTATGTTCACCTTTTTT			12	0.0002189	0.03684	fp0415	pruA	-6.5	0.483438	73 -- 80	33 -- 40	1-pyrroline-5-carboxylate dehydrogenase
>NZ_CP007627	Flavobacterium psychrophilum strain=CSF259-93 eval=2.55e-23		13	0.0002195	0.03684	fp0015	sprD	-7.24	0.381877	112 -- 123	27 -- 38	Putative cell surface protein precursor SprD
CCATTACATAAGTAGGTTAAGTTATGGTAGATTTGGGGCAAAAAAGGCGGAACTTAATAATTCCGCCTTTTTT			14	0.0002221	0.03684	fp0253	N/A	-4.86	0.728474	18 -- 45	12 -- 36	Probable transcriptional regulator AraC family
>NZ_CP008902	Flavobacterium psychrophilum strain=950106-1/1 eval=2.55e-23		15	0.0002616	0.03963	fp1017	N/A	-9.14	0.184722	37 -- 77	12 -- 40	Two-component system sensor histidine kinase	fp1019
CCATTACATAAGTAGGTTAAGTTATGGTAGATTTGGGGCAAAAAAGGCGGAACTTAATAATTCCGCCTTTTTT			16	0.0003256	0.03963	fp1972	gldL	-8.99	0.196087	159 -- 184	13 -- 36	Gliding motility transmembrane protein GldL
>NC_015844	Zobellia galactanivorans strain=DsiJT eval=1.46e-09		17	0.0003375	0.03963	fp1411	N/A	-9.2	0.180074	224 -- 255	8 -- 40	Probable sugar O-acetyltransferase
CCATAGCATAAGTAGGTTAAGTTCATGGTAAGATTTGGGGAAAAAAGGTGGAGCTATGCTCCGCCTTTTTT			18	0.0003463	0.03963	fp1169	N/A	-7.23	0.383381	219 -- 238	8 -- 28	Probable outer membrane protein precursor OmpA family	fp0321
>NZ_CP015107	Flavobacterium columnare strain=C#2 eval=7.34e-14		19	0.0003676	0.03963	fp2526	N/A	-13.01	0.028399	48 -- 77	13 -- 38	Transposase ISNCY family	fp2536
CCATTACAATAAGTAGGTTAAGTTATGGTAGATTTGGGGCAAAAAAAGGCAGAATTAAGTTCTGCCTTTTTT			20	0.0003689	0.03963	fp1416	N/A	-12.74	0.032884	190 -- 213	10 -- 36	Probable penicillin-binding protein precursor
>NZ_CP017479	Flavobacterium gilvum strain=EM1308 eval=3.94e-09		21	0.0003776	0.03963	fp0105	N/A	-12.17	0.044294	252 -- 271	21 -- 38	Protein of unknown function precursor
CCATAATTTTAGTAGGTTAAGTTTATGGTAGATTTGGGGCAAAAAGGGTGAAAGTAACATTTCACCTTTTTT			22	0.000378	0.03963	fp2134	N/A	-18.83	0.000717	248 -- 275	15 -- 40	Conserved protein of unknown function
>NZ_CP017688	Flavobacterium crassostreae strain=LPB0076 eval=5.44e-10		23	0.000406	0.03963	fp0696	N/A	-14.44	0.012727	176 -- 219	8 -- 37	Probable extracellular ribonuclease precursor	fp0721
CCATAAAATTAGTAGGTTAAGTTTATGGTAGATTTGGGGCAAAAGGGGTGGAAGAAATTCCGCCCTTTTT			24	0.0004486	0.03963	fp0986	N/A	-17.6	0.001723	246 -- 272	11 -- 37	Probable modification methyltransferase
			25	0.000466	0.03963	fp1217	gapA2	-13.76	0.018778	110 -- 139	15 -- 39	Glyceraldehyde-3-phosphate dehydrogenase (phosphorylating)
Sequence alignment was produced using Multalin tool using default parameters (http://multalin.toulouse.inra.fr/multalin/multalin.html).			26	0.0004676	0.03963	fp1301	N/A	-16.59	0.003395	205 -- 235	3 -- 38	Sodium:solute symporter
			27	0.0004872	0.03963	fp0725	N/A	-9.6	0.151505	228 -- 235	32 -- 39	Putative sugar phosphate isomerase
			28	0.0004946	0.03963	fp1864	N/A	-9.24	0.177079	125 -- 142	11 -- 30	Glycosyl transferase group 1 family protein
			29	0.0004949	0.03963	fp1019	N/A	-11.6	0.059014	261 -- 293	12 -- 39	Probable two-component system sensor histidine kinase	fp1017
			30	0.000571	0.04292	fp0367	N/A	-15.73	0.00588	45 -- 73	10 -- 38
			31	0.0005853	0.04292	fp0229	N/A	-9.1	0.187942	35 -- 69	1 -- 39	Probable M23/M37 family peptidase
			32	0.0005915	0.04292	fp1959	N/A	-7.96	0.294902	3 -- 24	8 -- 28	Protein of unknown function precursor; putative adhesin	fp2244
			33	0.0007214	0.04939	fp0010	N/A	-14.13	0.015216	224 -- 255	12 -- 40	Probable transmembrane protein of unknown function
			34	0.0007231	0.04939	fp0371	N/A	-13.14	0.026522	43 -- 87	5 -- 36	Protein of unknown function precursor
			35	0.0007565	0.05019	fp0696	N/A	-14.44	0.012727	176 -- 219	8 -- 37	Probable extracellular ribonuclease precursor	fp0721
			36	0.000823	0.05115	fp1721	ggt	-16.61	0.003358	168 -- 205	5 -- 39	Gamma-glutamyltransferase
			37	0.000849	0.05115	fp1637	wbhW	-18.57	0.00087	37 -- 70	6 -- 39	Protein of unknown function WbhW
			38	0.000849	0.05115	fp1637	wbhW	-18.57	0.00087	37 -- 70	6 -- 39	Protein of unknown function WbhW
			39	0.0008814	0.05115	fp0014	sprC	-9.5	0.158037	50 -- 71	15 -- 40	Putative adhesin precursor SprC
			40	0.0008952	0.05115	fp1607	N/A	-13.83	0.018026	14 -- 54	1 -- 38	Probable lipoprotein precursor
			41	0.0009036	0.05115	fp2202	N/A	-8.17	0.273172	165 -- 187	14 -- 38
The use of three sRNA homologs with some degree of divergence is mandatory for CopraRNA tool.			42	0.0009422	0.05115	fp1343	rpsL	-18.41	0.000981	43 -- 71	11 -- 38	30S ribosomal protein S12
If this criteria is true, the list of putative sRNA targets is ranked based on CopraRNA p-value. If not, the list is ranked based on IntaRNA p-value.			43	0.0009472	0.05115	fp0728	N/A	-12.85	0.03096	226 -- 236	28 -- 38	Putative methyltransferase
			44	0.0009939	0.05245	fp1344	N/A	-9.93	0.131088	172 -- 201	19 -- 39	Probable outer membrane protein precursor
			45	0.00111	0.05547	fp2081	N/A	-11.67	0.057237	32 -- 40	32 -- 40	O-methyltransferase
			46	0.001124	0.05547	fp2182	N/A	-9.38	0.166748	115 -- 127	26 -- 39	Probable penicillin-binding protein precursor	fp0482
			47	0.001154	0.05547	fp1928	N/A	-18.14	0.001181	35 -- 49	26 -- 40	Acyl-CoA dehydrogenase family protein
			48	0.001176	0.05547	fp1127	lepB	-6.31	0.512514	181 -- 188	28 -- 35	Signal peptidase I
			49	0.001193	0.05547	fp2308	N/A	-9.37	0.167549	266 -- 296	15 -- 39	Protein of unknown function precursor
			50	0.001195	0.05547	fp0287	N/A	-9.1	0.187622	208 -- 232	16 -- 39	Probable lipoprotein precursor
			51	0.001236	0.05627	fp2133	N/A	-7.87	0.305223	197 -- 220	11 -- 36	Protein of unknown function containing peptidoglycan binding domain
			52	0.001287	0.05723	fp0060	tas	-7.54	0.344054	69 -- 75	32 -- 38	Oxidoreductase Tas aldo/keto reductase family
			53	0.00132	0.05723	fp1604	N/A	-8.32	0.257734	1 -- 19	11 -- 26	Probable TonB-dependent outer membrane receptor precursor
			54	0.001331	0.05723	fp2076	N/A	-11.78	0.05412	171 -- 186	20 -- 37	Probable transmembrane protein of unknown function; putative anti ECF-type sigma factor
			55	0.001475	0.06229	fp1743	N/A	-6.62	0.466897	77 -- 104	17 -- 39	Hypothetical protein
			56	0.001525	0.06321	fp2403	N/A	-7.19	0.388305	110 -- 138	12 -- 39	Probable outer membrane efflux protein precursor
			57	0.001586	0.06366	fp0718	N/A	-10.45	0.102902	218 -- 230	29 -- 39
			58	0.00159	0.06366	fp1407	N/A	-11.34	0.067265	191 -- 214	11 -- 35
			59	0.001631	0.06395	fp1606	fumC	-12.38	0.039603	123 -- 162	15 -- 39	Fumarate hydratase class II
			60	0.001653	0.06395	fp1499	N/A	-7.6	0.337365	177 -- 202	12 -- 32	Protein of unknown function precursor; putative adhesin	fp2513
			61	0.001694	0.06449	fp0982	N/A	-10.03	0.124765	126 -- 138	22 -- 34	Probable ATP-dependent exodeoxyribonuclease
			62	0.001765	0.06609	fp0082	N/A	-13.25	0.024894	197 -- 237	9 -- 38	Probable M1 family metalloprotease precursor	fp0178 fp0177 fp0171 fp0170 fp0180 fp0176 fp0169 fp0174 fp0179 fp0172 fp0173 fp0168 fp0166 fp0175 fp0167 fp1479
			63	0.001839	0.06668	fp0946	N/A	-8	0.290683	160 -- 183	15 -- 38	Putative DNA or RNA helicase
			64	0.001841	0.06668	fp1594	tpx	-13.95	0.016911	4 -- 40	3 -- 33	2-Cys peroxiredoxin
			65	0.001867	0.06668	fp1015	N/A	-13.22	0.025356	151 -- 183	12 -- 39	Probable two-component system response regulatory protein
			66	0.00195	0.06859	fp0280	N/A	-13.92	0.017214	258 -- 284	12 -- 39	Probable M36 fungalysin family metalloprotease precursor	fp0281 fp0087
			67	0.002019	0.06926	fp1036	N/A	-9.76	0.14103	225 -- 263	13 -- 39
			68	0.00204	0.06926	fp0621	N/A	-6.2	0.527407	54 -- 64	12 -- 22	Protein of unknown function precursor putative sensor of anti-sigma and ECF sigma factor
			69	0.002058	0.06926	fp0055	metG	-8.12	0.277563	241 -- 262	12 -- 40	Methionine--tRNA ligase
			70	0.002148	0.07127	fp1041	pheT	-17.25	0.002193	66 -- 93	12 -- 38	Phenylalanine--tRNA ligase beta subunit
			71	0.002204	0.07208	fp0024	gldH	-11.92	0.050448	112 -- 119	30 -- 37	Gliding motility lipoprotein precursor GldH
			72	0.002244	0.07235	fp1498	argS	-8.96	0.199331	116 -- 149	8 -- 37	Arginine--tRNA ligase
			73	0.002323	0.0736	fp1043	N/A	-13.8	0.018383	1 -- 33	5 -- 39	Probable transmembrane protein of unknown function
			74	0.002431	0.0736	fp0909	N/A	-11.3	0.068541	218 -- 246	14 -- 40	Probable lipoprotein precursor
			75	0.002464	0.0736	fp0339	ppa	-12.35	0.040283	149 -- 176	10 -- 39	Inorganic diphosphatase
			76	0.002465	0.0736	fp0061	N/A	-12.57	0.035943	217 -- 242	13 -- 38	Flagellar motor/Chemotaxis (MotB)-related lipoprotein precursor
			77	0.002471	0.0736	fp1909	pcm	-9.59	0.151877	192 -- 198	32 -- 38	Protein-L-isoaspartate(D-aspartate) O-methyltransferase
			78	0.002487	0.0736	fp2466	N/A	-5.81	0.58706	179 -- 186	30 -- 37
			79	0.002504	0.0736	fp2222	nuoJ	-9.14	0.184811	55 -- 80	16 -- 40	NADH dehydrogenase I J subunit
			80	0.002583	0.07496	fp0273	N/A	-12.15	0.044789	233 -- 240	32 -- 39
			81	0.002625	0.07526	fp2525	N/A	-10.52	0.099602	228 -- 235	30 -- 37	Probable transposase	fp2579
			82	0.002699	0.07613	fp2010	recQ2	-9.49	0.158637	103 -- 110	32 -- 39	ATP-dependent DNA helicase RecQ2
			83	0.002749	0.07613	fp0537	pyrF	-15.74	0.005837	189 -- 211	15 -- 38	Orotidine-5'-phosphate decarboxylase
			84	0.002754	0.07613	fp0049	crt	-8.27	0.262064	48 -- 78	1 -- 37	Probable 3-hydroxybutyryl-CoA dehydratase
			85	0.002898	0.07917	fp0150	N/A	-12.33	0.040741	30 -- 51	15 -- 38	ArgE/DapE/Acy1 family protein
			86	0.002987	0.08064	fp0266	N/A	-10.14	0.118695	29 -- 36	31 -- 38		fp0331
			87	0.003079	0.08195	fp1092	rhlE	-5.89	0.575102	118 -- 157	2 -- 34	Putative ATP-dependent RNA helicase RhlE
			88	0.003106	0.08195	fp1223	N/A	-13.18	0.02587	139 -- 171	15 -- 40	Probable ion transporter
			89	0.003153	0.08226	fp1709	N/A	-16.68	0.003212	127 -- 153	12 -- 38
			90	0.003289	0.08485	fp1682	N/A	-11.28	0.069398	96 -- 117	8 -- 29	Probable transmembrane protein of unknown function
			91	0.003404	0.08634	fp1957	hutU	-10.91	0.082881	77 -- 100	15 -- 36	Urocanate hydratase
			92	0.00349	0.08634	fp2254	N/A	-16.52	0.003554	39 -- 66	12 -- 39
			93	0.003505	0.08634	fp1795	pyrB	-9.92	0.13126	1 -- 23	14 -- 40	Aspartate carbamoyltransferase
			94	0.003519	0.08634	fp0089	feoA	-9.17	0.182133	190 -- 212	15 -- 37	Ferrous iron transport protein A
			95	0.003569	0.08634	fp0111	glmS	-12.73	0.032972	165 -- 208	1 -- 38	Glucosamine--fructose-6-phosphate aminotransferase [isomerizing]
			96	0.003571	0.08634	fp0326	porT	-13.71	0.019336	130 -- 162	11 -- 40	PorT protein precursor
			97	0.003607	0.08634	fp2028	N/A	-10.11	0.120449	89 -- 109	16 -- 38	Transmembrane protein of unknown function DedA family
			98	0.00369	0.08671	fp2384	N/A	-7.34	0.368492	50 -- 105	1 -- 39	Protein of unknown function precursor
			99	0.003737	0.08671	fp0417	N/A	-9.68	0.145892	72 -- 80	32 -- 40	Protein of unknown function precursor
			100	0.003754	0.08671	fp0587	N/A	-6.67	0.459239	182 -- 200	20 -- 38		fp0442
			101	0.003772	0.08671	fp1375	N/A	-13.58	0.020734	172 -- 204	6 -- 37	Probable transmembrane protein of unknown function
			102	0.003853	0.08759	fp1516	N/A	-6.18	0.531734	219 -- 258	7 -- 42	Two-component system sensor histidine kinase
			103	0.003885	0.08759	fp1540	N/A	-14.52	0.012172	187 -- 223	11 -- 37
			104	0.00413	0.09222	fp1464	N/A	-8.27	0.262009	156 -- 183	12 -- 40	Probable ABC-type iron(III)-transport system permease component
			105	0.004199	0.09285	fp2328	bioA	-14.96	0.009388	267 -- 283	21 -- 37	adenosylmethionine--8-amino-7-oxononanoate aminotransferase BioA
			106	0.004284	0.09384	fp0702	N/A	-9.34	0.169345	28 -- 49	9 -- 35	Probable peroxiredoxin
			107	0.00439	0.09402	fp1992	rmuC	-6.67	0.459247	235 -- 241	35 -- 41	DNA recombination protein RmuC
			108	0.004396	0.09402	fp2439	N/A	-10.18	0.116834	46 -- 88	8 -- 37	acyl-CoA thioesterase
			109	0.004451	0.09402	fp2302	gspG	-15.41	0.007125	214 -- 243	12 -- 39	Putative bacterial general secretion pathway protein G precursor
			110	0.004461	0.09402	fp0886	N/A	-16.14	0.004538	39 -- 64	13 -- 39	Probable S41 family peptidase precursor
			111	0.004571	0.09402	fp0078	N/A	-9	0.195378	215 -- 236	15 -- 40	Protein of unknown function precursor
			112	0.004583	0.09402	fp1781	N/A	-10.01	0.126035	209 -- 247	1 -- 38	Probable ferredoxin
			113	0.004608	0.09402	fp0413	N/A	-11.38	0.066052	76 -- 100	18 -- 40	Fatty acid desaturase
			114	0.004622	0.09402	fp0438	N/A	-8.71	0.220748	263 -- 281	12 -- 31	Major facilitator superfamily (MFS) permease
			115	0.004657	0.09402	fp2614	birA	-9.32	0.170948	216 -- 236	11 -- 37	Probable biotin--[acetyl-CoA-carboxylase] ligase
			116	0.004835	0.09439	fp1852	N/A	-6.11	0.541113	270 -- 285	17 -- 38	Two-component system response regulatory protein LytTR family
			117	0.004835	0.09439	fp2347	mtgA	-9	0.195364	10 -- 29	15 -- 36	Monofunctional biosynthetic peptidoglycan transglycosylase
			118	0.004851	0.09439	fp1125	N/A	-8.37	0.252424	169 -- 197	21 -- 39
			119	0.004916	0.09439	fp2371	lpxH	-10.52	0.099938	158 -- 188	9 -- 36	UDP-2 3-diacylglucosamine hydrolase
			120	0.004998	0.09439	fp0016	sprB	-2.69	0.951712	15 -- 29	23 -- 39	Putative adhesin precursor SprB	fp0006
			121	0.00503	0.09439	fp1705	rnz	-7.28	0.376535	146 -- 171	15 -- 39	Ribonuclease Z
			122	0.005125	0.09439	fp0688	N/A	-12.44	0.038565	213 -- 243	4 -- 36	Protein of unknown function precursor; putative adhesin
			123	0.005125	0.09439	fp0688	N/A	-12.44	0.038565	213 -- 243	4 -- 36	Protein of unknown function precursor; putative adhesin
			124	0.005127	0.09439	fp2483	N/A	-11.05	0.077702	31 -- 49	21 -- 38	Probable transmembrane protein of unknown function
			125	0.005191	0.09439	fp1729	N/A	-7.87	0.305327	223 -- 258	1 -- 38	Probable peroxiredoxin
			126	0.005273	0.09439	fp0617	N/A	-10.33	0.109208	172 -- 187	13 -- 35
			127	0.005293	0.09439	fp0217	ileS	-12.95	0.029265	205 -- 240	12 -- 39	Isoleucine--tRNA ligase
			128	0.005338	0.09439	fp1596	N/A	-8.62	0.228659	169 -- 192	15 -- 39
			129	0.005422	0.09439	fp1182	secE	-14.19	0.014755	242 -- 271	9 -- 39	Preprotein translocase SecE subunit
			130	0.005557	0.09439	fp1886	N/A	-13.86	0.017778	28 -- 65	5 -- 40	Probable ribosomal-protein-amino-adic N-acetyltransferase	fp0497 fp1033
			131	0.005581	0.09439	fp1163	hemN	-13.11	0.026845	231 -- 262	12 -- 39	Oxygen-independent coproporphyrinogen III oxidase HemN
			132	0.005588	0.09439	fp2095	uppS	-10.27	0.112069	174 -- 211	11 -- 37	Di-trans poly-cis-decaprenylcistransferase
			133	0.00559	0.09439	fp2308	N/A	-9.37	0.167549	266 -- 296	15 -- 39	Protein of unknown function precursor
			134	0.005602	0.09439	fp1802	yghO	-14.84	0.010079	193 -- 221	15 -- 39	Protein of unknown function YghO
			135	0.005629	0.09439	fp0654	coaD	-9.55	0.155097	64 -- 73	31 -- 40	Pantetheine-phosphate adenylyltransferase
			136	0.005639	0.09439	fp2110	N/A	-8.88	0.205391	178 -- 202	12 -- 37
			137	0.005643	0.09439	fp0710	N/A	-6.42	0.495783	140 -- 152	25 -- 38	Two-component system sensor histidine kinase
			138	0.005648	0.09439	fp2029	cynT	-9.05	0.191586	1 -- 14	28 -- 40	Carbonic anhydrase
			139	0.005651	0.09439	fp1402	N/A	-9.16	0.182771	6 -- 12	32 -- 38	Protein of unknown function precursor
			140	0.005708	0.09467	fp2012	N/A	-7.91	0.300395	138 -- 165	11 -- 39	Hypothetical protein
			141	0.005778	0.09475	fp2141	N/A	-10.5	0.100689	280 -- 298	20 -- 38	Major facilitator superfamily (MFS) permease	fp2410
			142	0.005794	0.09475	fp0455	rpsI	-13.55	0.021084	158 -- 204	1 -- 39	30S ribosomal protein S9
			143	0.005931	0.0963	fp0064	N/A	-10.48	0.101767	206 -- 257	7 -- 38	Putative phosphoglycerate dehydrogenase
			144	0.006078	0.098	fp0582	N/A	-9.5	0.157884	244 -- 254	11 -- 21
			145	0.006248	0.1001	fp1592	ftsK	-12.42	0.038934	178 -- 203	7 -- 36	DNA translocase FtsK
			146	0.006302	0.1001	fp1624	N/A	-12.42	0.038857	222 -- 271	4 -- 38	Probable lipoprotein precursor
			147	0.006336	0.1001	fp0891	N/A	-14.29	0.013889	198 -- 233	2 -- 35	Peptidase M16 family
			148	0.006406	0.1004	fp2585	N/A	-13.61	0.020451	94 -- 117	13 -- 38	Probable transposase
			149	0.006443	0.1004	fp1767	N/A	-12.42	0.038893	183 -- 191	30 -- 38	Probable thiamine diphosphokinase
			150	0.006514	0.1006	fp1768	rlmF	-11.48	0.062793	239 -- 252	27 -- 38	Ribosomal RNA large subunit methyltransferase F
			151	0.006635	0.1006	fp1054	N/A	-8.16	0.273634	210 -- 229	15 -- 36
			152	0.006655	0.1006	fp1154	ccoS	-7.62	0.334328	51 -- 70	20 -- 40	Probable cytochrome cbb3 oxidase maturation protein CcoS
			153	0.006753	0.1006	fp1055	N/A	-8.1	0.280238	20 -- 27	32 -- 39	Glycosyl transferase group 2 family protein
			154	0.006805	0.1006	fp1221	N/A	-12.17	0.044319	225 -- 259	11 -- 38
			155	0.006845	0.1006	fp0433	thiH	-8.11	0.278842	154 -- 187	4 -- 38	Thiazole biosynthesis protein ThiH
			156	0.006859	0.1006	fp1435	N/A	-7.81	0.312676	256 -- 272	15 -- 30	Probable secreted exopolyphosphatase precursor
			157	0.006861	0.1006	fp1973	gldK	-10.22	0.114609	190 -- 200	27 -- 37	Gliding motility lipoprotein precursor GldK
			158	0.006916	0.1006	fp2047	N/A	-7.28	0.377091	43 -- 58	3 -- 19
			159	0.006998	0.1006	fp1625	pabB	-10.7	0.091904	117 -- 141	15 -- 38	Para-aminobenzoate synthase component I
			160	0.007016	0.1006	fp2011	N/A	-8.74	0.217981	250 -- 271	11 -- 36
			161	0.007049	0.1006	fp1689	N/A	-13.87	0.01768	87 -- 116	1 -- 38	Protein of unknown function precursor
			162	0.007062	0.1006	fp1614	pfkA	-13.13	0.026604	19 -- 52	15 -- 39	6-phosphofructokinase
			163	0.007063	0.1006	fp0009	N/A	-9.84	0.136005	35 -- 65	7 -- 40	Probable cAMP-binding protein
			164	0.007121	0.1008	fp2566	N/A	-10.22	0.114425	109 -- 132	11 -- 37	Transposase IS3 family
			165	0.007166	0.1008	fp1668	mrp	-12.78	0.032197	96 -- 131	11 -- 38	ATP-binding protein Mrp/Nbp35 family
			166	0.007357	0.1028	fp2405	N/A	-7	0.413142	50 -- 75	15 -- 36	Polyprenyl synthetase
			167	0.007393	0.1028	fp0467	uspA	-8.2	0.26992	90 -- 108	12 -- 30	Universal stress protein UspA
			168	0.007512	0.1038	fp1471	N/A	-7.88	0.304072	2 -- 54	2 -- 38	Probable hybrid two-component system sensor histidine kinase and response regulator receiver
			169	0.00759	0.1038	fp2420	pbpA	-8.16	0.274247	23 -- 29	32 -- 38	Penicillin-binding protein 2. Peptidoglycan glycosyltransferase
			170	0.007641	0.1038	fp1278	N/A	-7.19	0.38852	142 -- 153	29 -- 40	Probable aminotransferase
			171	0.007645	0.1038	fp1582	panE	-15.28	0.007759	105 -- 131	15 -- 38	2-dehydropantoate 2-reductase
			172	0.008182	0.1105	fp1239	pssA	-5.56	0.625481	243 -- 275	5 -- 36	CDP-diacylglycerol--serine O-phosphatidyltransferase
			173	0.008475	0.1133	fp1202	lysS	-12.54	0.036477	126 -- 153	12 -- 39	Lysine--tRNA ligase
			174	0.008576	0.1133	fp0030	atoA	-8.29	0.260467	152 -- 167	21 -- 39	3-oxoacid CoA-transferase subunit B family protein AtoA
			175	0.008616	0.1133	fp0891	N/A	-14.29	0.013889	198 -- 233	2 -- 35	Peptidase M16 family
			176	0.008619	0.1133	fp1834	N/A	-10.79	0.087947	1 -- 33	11 -- 40	Putative 2 3-cyclic phosphodiesterase
			177	0.008687	0.1133	fp2421	rodA	-11.02	0.07875	80 -- 112	5 -- 35	Rod shape-determining protein RodA
			178	0.008711	0.1133	fp0988	N/A	-10.89	0.083812	40 -- 70	7 -- 39	Probable TonB-dependent outer membrane receptor precursor
			179	0.008739	0.1133	fp2291	ansA	-9.88	0.133623	13 -- 44	12 -- 39	Asparaginase 1
			180	0.008787	0.1133	fp1106	N/A	-7.73	0.321003	110 -- 136	12 -- 37	RNA polymerase ECF-type sigma factor
			181	0.00892	0.1137	fp0212	N/A	-12.55	0.036339	75 -- 92	21 -- 38
			182	0.008932	0.1137	fp0666	N/A	-10.26	0.112373	171 -- 189	12 -- 37	ATP-dependent RNA helicase DEAD box family
			183	0.009025	0.1137	fp1801	N/A	-8.49	0.241159	210 -- 220	27 -- 37
			184	0.009056	0.1137	fp0101	N/A	-11.27	0.0696	175 -- 213	11 -- 37
			185	0.0091	0.1137	fp1176	rpoB	-11.09	0.076066	233 -- 260	8 -- 40	DNA-directed RNA polymerase beta subunit RpoB
			186	0.009107	0.1137	fp0966	N/A	-11.86	0.051889	236 -- 246	28 -- 38	Probable DNA polymerase III subunit
			187	0.009193	0.1141	fp0082	N/A	-13.25	0.024894	197 -- 237	9 -- 38	Probable M1 family metalloprotease precursor
			188	0.00938	0.1147	fp1772	N/A	-7.36	0.366369	4 -- 24	11 -- 35	Protein of unknown function precursor
			189	0.009414	0.1147	fp0645	N/A	-9.21	0.178801	184 -- 228	12 -- 38	Probable TonB-dependent outer membrane siderophore receptor precursor
			190	0.009414	0.1147	fp1830	N/A	-3.57	0.885359	178 -- 187	28 -- 38	Protein of unknown function precursor; putative adhesin
			191	0.009437	0.1147	fp0524	asd	-11.25	0.070251	81 -- 98	21 -- 38	Aspartate-semialdehyde dehydrogenase
			192	0.009629	0.1165	fp2104	N/A	-10.89	0.083696	23 -- 36	24 -- 38
			193	0.009804	0.118	fp2071	N/A	-11.19	0.072315	96 -- 119	15 -- 38	Two-component system response regulatory protein LuxR family
			194	0.009868	0.1181	fp0709	N/A	-11.2	0.07216	65 -- 107	1 -- 40	Putative phosphoesterase
			195	0.00993	0.1182	fp0854	N/A	-6.61	0.468159	1 -- 14	15 -- 28	Phosphoglucomutase/phosphomannomutase family protein
			196	0.01002	0.1187	fp2067	engB	-10.18	0.116786	214 -- 241	12 -- 38	Probable GTP-binding protein EngB
			197	0.01008	0.1188	fp1153	ccoI	-14.82	0.01022	1 -- 34	10 -- 39	Probable cytochrome cbb3 oxidase maturation protein CcoI
			198	0.0102	0.1194	fp1101	nth	-5.35	0.65617	13 -- 50	3 -- 36	DNA-(apurinic or apyrimidinic site) lyase
			199	0.01023	0.1194	fp0128	batD	-14.65	0.011282	185 -- 196	28 -- 39	BatD protein
			200	0.01029	0.1195	fp0293	N/A	-14.14	0.015112	153 -- 170	21 -- 38	Probable polysaccharide deacetylase

## Sheet: Rfp18
Locustag=THC0290_N_0179
Name=Rfp18			OUTPUT
INPUT_sequence	Genome_blastn_eval		Rank	CopraRNA p-value	CopraRNA fdr value	Locus Tag	Gene Name	Energy [kcal/mol]	IntaRNA p-value	Position mRNA	Position sRNA	Annotation (retrieved from the complete genome sequence of strain JIP02/86, Duchaud E. et al Nature Biotechno 2007)	Additional homologs
>NC_009613	Flavobacterium psychrophilum JIP02/86 strain=JIP02/86 eval=2.83e-33		1	2.326e-07	0.0005352	fp1619	N/A	-17.4	0.000219	177 -- 207	34 -- 63	Probable M43 cytophagalysin family metalloprotease
CAATTGAGGGGGTGGTTCCCTAAAATTGATAAATTTTCATAATTTATAGTTTTTTGGTTGGTTAAGACATAAAAACTCAGTCATTTATTTGACTGGG			2	1.1e-05	0.01266	fp2413	claF	-11.06	0.023993	176 -- 207	34 -- 63	Protein of unknown function precursor; putative adhesin
>NC_009441	Flavobacterium johnsoniae UW101 strain=UW101; ATCC 17061 eval=8.71e-15		3	8.884e-05	0.06814	fp0506	N/A	-15.6	0.001006	183 -- 204	44 -- 65	Probable metalloprotease precursor; elastase (not conserved in all F. psychrophilum genomes, absent in OSU THCO2-90)
GAAGGGGTGGTTTCCTTCTGAATTGATATAAATTTCATAATTTATAGTTTTTTGGTTAGTTAATAGCATAAAAACTCAGTCTTCTTGACTG			4	0.0001356	0.07323	fp2079	N/A	-18.14	0.00011	165 -- 207	34 -- 70	Probable lipoprotein precursor
>NC_016510	Flavobacterium columnare ATCC 49512 strain=ATCC 49512 eval=1.62e-19		5	0.0001591	0.07323	fp1596	N/A	-12.83	0.007689	177 -- 219	30 -- 68	Hypothetical protein
TTGAGGGGTGGTTCCCTCTGAACTTAATAAATTTTCATAATTTATAGTTTTTTGGTTGGTTAATAACATAAAAACTCAGTCATTTCCTGATTGGG			6	0.0002757	0.104	fp2402	N/A	-9.05	0.076239	178 -- 207	34 -- 63	Probable membrane fusion efflux lipoprotein precursor
>NC_017025	Flavobacterium indicum GPTSA100-9 = DSM 17447 strain=GPTSA100-9 eval=1.66e-16		7	0.0003463	0.104	fp1945	N/A	-16.99	0.000316	220 -- 254	35 -- 67	Hypothetical protein
CAATCTGAGAGGTAGTAGACTCAAATTGTGTATAAGTTTTTCATAATTTATAGTTTTTTGGTTGGTTAATAGCATAAAAACTCAGTCATTTCTTTTGACTGGG			8	0.0004322	0.104	fp1474	N/A	-10.1	0.042444	173 -- 210	31 -- 63	Putative acetyltransferase GNAT family
>NZ_CP007627	Flavobacterium psychrophilum strain=CSF259-93 eval=2.83e-33		9	0.0004613	0.104	fp0049	crt	-7.66	0.155062	258 -- 271	50 -- 63	Probable 3-hydroxybutyryl-CoA dehydratase
CAATTGAGGGGGTGGTTCCCTAAAATTGATAAATTTTCATAATTTATAGTTTTTTGGTTGGTTAAGACATAAAAACTCAGTCATTTATTTGACTGGG			10	0.0006042	0.104	fp0617	N/A	-14.31	0.00272	178 -- 207	34 -- 67
>NZ_CP008902	Flavobacterium psychrophilum strain=950106-1/1 eval=2.83e-33		11	0.000627	0.104	fp1810	N/A	-8.09	0.125695	62 -- 72	58 -- 68	Probable membrane fusion efflux lipoprotein precursor
CAATTGAGGGGGTGGTTCCCTAAAATTGATAAATTTTCATAATTTATAGTTTTTTGGTTGGTTAAGACATAAAAACTCAGTCATTTATTTGACTGGG			12	0.0006592	0.104	fp2455	N/A	-16.22	0.000607	57 -- 72	51 -- 66
>NZ_CP015107	Flavobacterium columnare strain=C#2 eval=2.24e-20		13	0.0007709	0.104	fp0355	N/A	-5.72	0.362391	260 -- 293	30 -- 64	Protein of unknown function precursor
TTGAGGGGTGGTTCCCTCTGAACTTTATAAATTTTCATAATTTATAGTTTTTTGGTTGGTTAATAACATAAAAACTCAGTCATTTTCTGATTGGG			14	0.0008012	0.104	fp2338	N/A	-3.72	0.684162	57 -- 63	57 -- 63	Probable proton-dependent di-tripeptide transporter
>NZ_CP017479	Flavobacterium gilvum strain=EM1308 eval=4.37e-19		15	0.0008127	0.104	fp0464	N/A	-6.94	0.217207	141 -- 157	2 -- 18	dCMP deaminase
GAGGGGGTGGTTTCCTTCCAAGTTTCATATAAATTTTCATAATTTATAGTTTTTTGGTTAGTTAATAGCATAAAAACTCAGTCATTAATTTGACTG			16	0.0008334	0.104	fp2439	N/A	-6.18	0.301366	74 -- 102	43 -- 69	acyl-CoA thioesterase
>NZ_CP017688	Flavobacterium crassostreae strain=LPB0076 eval=1.20e-15		17	0.000841	0.104	fp0718	N/A	-11.64	0.016756	218 -- 244	34 -- 62
AATAGAGGGGGTGGTTTCCTTCTAAGTGATATAAACTTCATAATTTATATTTTTTTTGGTTAGTTAATAGCATAAAAACTCAGTCATAATTTGACTG			18	0.0009809	0.104	fp1659	N/A	-11	0.02488	168 -- 192	49 -- 68	Probable ABC-type transport system ATPase component
			19	0.0009947	0.104	fp1652	N/A	-11.53	0.017953	181 -- 204	37 -- 60
Sequence alignment was produced using Multalin tool using default parameters (http://multalin.toulouse.inra.fr/multalin/multalin.html).			20	0.0009983	0.104	fp0231	fpp1	-12.44	0.010013	175 -- 207	34 -- 65	Psychrophilic metalloprotease Fpp1 precursor	fp0232
			21	0.001058	0.104	fp1363	purE	-7.49	0.168515	109 -- 125	50 -- 64	5-(carboxyamino)imidazole ribonucleotide mutase
			22	0.001073	0.104	fp0231	fpp1	-12.44	0.010013	175 -- 207	34 -- 65	Psychrophilic metalloprotease Fpp1 precursor	fp0232
			23	0.001082	0.104	fp0550	yfbK	-9.54	0.058156	64 -- 82	49 -- 67	Probable outer membrane protein precursor YfbK
			24	0.001123	0.104	fp1031	N/A	-14.49	0.002368	199 -- 227	49 -- 72	Translation initiation factor SUI1 family protein
			25	0.00113	0.104	fp2488	rpiB	-11.77	0.015369	181 -- 225	11 -- 60	Ribose 5-phosphate isomerase
			26	0.001356	0.1151	fp2058	ftsW	-11	0.024922	173 -- 189	49 -- 63	Cell division protein FtsW
			27	0.001392	0.1151	fp1685	N/A	-7.3	0.183998	78 -- 90	49 -- 61	Probable lipoprotein precursor
			28	0.001403	0.1151	fp0403	N/A	-15.27	0.001309	197 -- 216	55 -- 74
			29	0.001486	0.1151	fp1725	N/A	-8.82	0.085942	172 -- 207	34 -- 66	Acetyl-CoA C-acyltransferase
			30	0.00151	0.1151	fp0356	N/A	-8.82	0.086045	3 -- 16	49 -- 62	Probable lipoprotein precursor
			31	0.001578	0.1151	fp0422	N/A	-8.72	0.090575	200 -- 217	50 -- 71	Probable ABC-type transport system ATPase and permease components
			32	0.001671	0.1151	fp0761	N/A	-11.56	0.01759	98 -- 109	52 -- 63	acyltransferase
			33	0.001684	0.1151	fp2166	N/A	-6.74	0.238057	23 -- 63	33 -- 63
The use of three sRNA homologs with some degree of divergence is mandatory for CopraRNA tool.			34	0.001786	0.1151	fp2202	N/A	-9.31	0.065969	179 -- 201	44 -- 67
If this criteria is true, the list of putative sRNA targets is ranked based on CopraRNA p-value. If not, the list is ranked based on IntaRNA p-value.			35	0.001816	0.1151	fp2044	N/A	-5.58	0.383288	29 -- 44	37 -- 51	Probable nucleoside-diphosphate-sugar epimerase
			36	0.001839	0.1151	fp0432	thiG	-10.61	0.031343	176 -- 201	44 -- 65	Thiazole biosynthesis protein ThiG
			37	0.001892	0.1151	fp0676	N/A	-4.21	0.602359	76 -- 96	46 -- 67	Probable transmembrane protein of unknown function
			38	0.001901	0.1151	fp1678	prmA	-7.64	0.15645	45 -- 102	32 -- 76	50S ribosomal protein L11 lysine methyltransferase
			39	0.001953	0.1152	fp2405	N/A	-7	0.211732	69 -- 85	50 -- 66	Polyprenyl synthetase
			40	0.002122	0.1221	fp1848	N/A	-11.75	0.015576	214 -- 228	49 -- 63
			41	0.00225	0.1263	fp1039	N/A	-8.62	0.095441	68 -- 78	51 -- 61	MutS family protein
			42	0.002477	0.1357	fp0416	apaG	-9.99	0.045217	125 -- 137	50 -- 62	Protein ApaG
			43	0.00256	0.1368	fp0027	N/A	-7.9	0.138079	87 -- 95	53 -- 61	Probable type I endonuclease-methyltransferase fusion protein
			44	0.002661	0.1368	fp0674	N/A	-9.78	0.050903	210 -- 230	50 -- 68	Probable transmembrane protein of unknown function
			45	0.002869	0.1368	fp0130	batB	-10	0.044795	22 -- 64	30 -- 63	BatB protein
			46	0.002919	0.1368	fp0617	N/A	-14.31	0.00272	178 -- 207	34 -- 67
			47	0.002919	0.1368	fp0617	N/A	-14.31	0.00272	178 -- 207	34 -- 67
			48	0.00299	0.1368	fp0010	N/A	-7.64	0.156778	33 -- 49	56 -- 69	Probable transmembrane protein of unknown function
			49	0.003086	0.1368	fp2111	ypmQ	-10.29	0.037987	178 -- 230	11 -- 63	Probable cytochrome c oxidase biogenesis protein YpmQ
			50	0.003174	0.1368	fp1120	N/A	-5.3	0.424729	27 -- 33	57 -- 63	Probable transmembrane protein of unknown function. Putative septum formation initiator
			51	0.003293	0.1368	fp0215	N/A	-14.12	0.003113	170 -- 244	6 -- 64	Protein of unknown function precursor	fp0216
			52	0.003371	0.1368	fp0371	N/A	-6.26	0.291477	198 -- 208	33 -- 43	Protein of unknown function precursor
			53	0.003413	0.1368	fp1494	N/A	-5.24	0.433055	169 -- 203	38 -- 73	Probable transmembrane protein of unknown function
			54	0.003417	0.1368	fp0112	N/A	-8.35	0.109952	176 -- 211	30 -- 67	Probable TonB-dependent outer membrane receptor precursor
			55	0.003481	0.1368	fp1460	bluB/cobT	-5.9	0.338643	7 -- 31	8 -- 21	Bifunctional protein : cob(II)yrinic acid a c-diamide reductase and nicotinate-nucleotide--dimethylbenzimidazole phosphoribosyltransferase
			56	0.003517	0.1368	fp1959	N/A	-7	0.211181	7 -- 16	60 -- 69	Protein of unknown function precursor; putative adhesin	fp2244
			57	0.003539	0.1368	fp1337	rplW	-9.66	0.054479	88 -- 102	56 -- 70	50S ribosomal protein L23
			58	0.003634	0.1368	fp1632	N/A	-10.85	0.027274	136 -- 168	37 -- 68	Glycosyl transferase group 2 family protein
			59	0.003699	0.1368	fp1952	N/A	-8.11	0.124267	236 -- 256	44 -- 64
			60	0.003719	0.1368	fp0369	N/A	-9.89	0.047764	179 -- 204	37 -- 65	Probable transmembrane protein of unknown function. Putative amino-acid efflux protein
			61	0.00378	0.1368	fp1174	N/A	-12.28	0.011102	173 -- 194	49 -- 67
			62	0.003827	0.1368	fp0241	aroA	-13.82	0.003867	41 -- 61	53 -- 74	3-phosphoshikimate 1-carboxyvinyltransferase
			63	0.003829	0.1368	fp0528	mdh	-12.63	0.008773	168 -- 209	32 -- 63	Malate dehydrogenase
			64	0.003942	0.1368	fp2307	N/A	-9.93	0.04656	175 -- 207	34 -- 62	Protein of unknown function precursor
			65	0.003993	0.1368	fp1346	N/A	-7.87	0.140248	277 -- 299	48 -- 68	Probable lipoprotein precursor	fp1198
			66	0.004009	0.1368	fp2413	claF	-11.06	0.023993	176 -- 207	34 -- 63	Protein of unknown function precursor; putative adhesin
			67	0.004015	0.1368	fp0230	pth	-6.45	0.269213	232 -- 240	52 -- 60	Aminoacyl-tRNA hydrolase
			68	0.004195	0.1368	fp0725	N/A	-6.63	0.249451	215 -- 221	11 -- 17	Putative sugar phosphate isomerase
			69	0.004221	0.1368	fp1929	pepD	-9.58	0.056817	199 -- 214	49 -- 64	Xaa-His dipeptidase
			70	0.004245	0.1368	fp1749	N/A	-6.87	0.223825	208 -- 217	54 -- 63	Probable transcriptional regulator
			71	0.00467	0.1368	fp2008	hupB	-10.15	0.041256	176 -- 204	37 -- 65	Histone-like bacterial DNA-binding protein HU-beta
			72	0.004697	0.1368	fp1608	N/A	-7.18	0.194905	221 -- 229	55 -- 63	Putative sugar-transporting permease
			73	0.00473	0.1368	fp0205	N/A	-10.44	0.03468	234 -- 263	32 -- 63
			74	0.004738	0.1368	fp1420	kdsC	-9.18	0.070784	264 -- 282	50 -- 68	3-deoxy-manno-octulosonate-8-phosphatase
			75	0.004743	0.1368	fp1589	ribBA	-6.6	0.252531	147 -- 160	50 -- 63	3 4-dihydroxy-2-butanone-4-phosphate synthase
			76	0.004782	0.1368	fp1972	gldL	-7.46	0.170502	151 -- 163	53 -- 65	Gliding motility transmembrane protein GldL
			77	0.004808	0.1368	fp1208	dnaA	-6.9	0.221439	137 -- 150	50 -- 63	Chromosomal replication initiator protein DnaA
			78	0.004817	0.1368	fp0517	N/A	-11.62	0.016936	128 -- 165	32 -- 68	Rhodanese-related sulfurtransferase
			79	0.004838	0.1368	fp0538	N/A	-10.45	0.034619	216 -- 230	49 -- 63	Probable ABC-type transport system binding protein precursor component
			80	0.004986	0.1368	fp0463	N/A	-7.75	0.148242	15 -- 26	51 -- 62	Probable membrane associated S41A family C-terminal processing peptidase
			81	0.00499	0.1368	fp1123	mutB	-8.94	0.080616	242 -- 259	49 -- 63	Methylmalonyl-CoA mutase large subunit
			82	0.005031	0.1368	fp0511	trpD	-8.21	0.11827	225 -- 238	49 -- 62	Anthranilate phosphoribosyltransferase
			83	0.005073	0.1368	fp2332	surE	-4.66	0.525967	56 -- 81	45 -- 65	5'-nucleotidase SurE
			84	0.005097	0.1368	fp0685	purM	-6.62	0.250715	88 -- 97	56 -- 65	Phosphoribosylformylglycinamidine cyclo-ligase
			85	0.005113	0.1368	fp0681	glyA	-9.2	0.070146	199 -- 220	49 -- 72	Glycine hydroxymethyltransferase
			86	0.005182	0.1368	fp1442	pyrR2	-10.89	0.026601	217 -- 235	49 -- 67	Bifunctional protein : pyrimidine operon regulatory protein and uracil phosphoribosyltransferase
			87	0.00527	0.1368	fp2502	N/A	-8.45	0.104214	30 -- 47	49 -- 63	Probable single-stranded DNA-binding protein
			88	0.005277	0.1368	fp0212	N/A	-7.67	0.154674	71 -- 85	49 -- 63
			89	0.005333	0.1368	fp1347	N/A	-6.84	0.227157	162 -- 173	51 -- 62	23S rRNA (guanosine(2251)-2'-O)-methyltransferase RlmB
			90	0.005353	0.1368	fp2413	claF	-11.06	0.023993	176 -- 207	34 -- 63	Protein of unknown function precursor; putative adhesin
			91	0.005486	0.1368	fp1903	fur	-7.35	0.179542	230 -- 252	38 -- 60	Ferric iron uptake transcription regulator Fur
			92	0.005581	0.1368	fp0618	N/A	-9.98	0.04541	23 -- 54	36 -- 73	Probable transmembrane protein of unknown function
			93	0.00559	0.1368	fp2110	N/A	-10.51	0.033284	289 -- 300	55 -- 67
			94	0.00563	0.1368	fp1470	gapA1	-10.51	0.033251	267 -- 282	1 -- 17	Glyceraldehyde-3-phosphate dehydrogenase (phosphorylating)
			95	0.005646	0.1368	fp1775	trmU	-11.86	0.014521	33 -- 75	1 -- 47	tRNA (5-methylaminomethyl-2-thiouridylate)-methyltransferase
			96	0.005746	0.1377	fp0072	serS	-5.05	0.463775	35 -- 57	41 -- 65	Serine--tRNA ligase
			97	0.005878	0.1384	fp1611	N/A	-10.91	0.026251	165 -- 207	34 -- 74	Hypothetical protein precursor
			98	0.005895	0.1384	fp1132	ykuF	-7.09	0.202553	166 -- 188	42 -- 63	Hypothetical oxidoreductase YkuF
			99	0.005997	0.1384	fp0123	N/A	-13.26	0.00572	180 -- 231	1 -- 67
			100	0.00616	0.1384	fp0138	pphA	-8.55	0.099392	19 -- 55	33 -- 69	Phosphoprotein phosphatase
			101	0.006166	0.1384	fp0589	N/A	-6.62	0.250376	76 -- 95	49 -- 68	Glycosyl transferase group 2 family protein
			102	0.006197	0.1384	fp0281	N/A	-8.13	0.122848	168 -- 207	34 -- 73	Probable M36 fungalysin family metalloprotease precursor	fp0280
			103	0.006197	0.1384	fp0281	N/A	-8.13	0.122848	168 -- 207	34 -- 73	Probable M36 fungalysin family metalloprotease precursor	fp0280
			104	0.006418	0.1394	fp0316	N/A	-8.3	0.112793	11 -- 38	51 -- 68
			105	0.006428	0.1394	fp1713	porQ	-6.11	0.310997	9 -- 29	41 -- 63	Protein of unknown function precursor PorQ
			106	0.006487	0.1394	fp0687	N/A	-5.13	0.449829	66 -- 72	12 -- 18	Acetyltransferase GNAT family
			107	0.006541	0.1394	fp0304	N/A	-12.46	0.009864	179 -- 207	34 -- 63	Hypothetical protein precursor
			108	0.006543	0.1394	fp1764	N/A	-10.73	0.029274	248 -- 262	49 -- 63	Probably involved in regulation of translation initiation
			109	0.006605	0.1394	fp2413	claF	-11.06	0.023993	176 -- 207	34 -- 63	Protein of unknown function precursor; putative adhesin
			110	0.006726	0.1394	fp1943	N/A	-6.25	0.293631	210 -- 224	49 -- 63	Probable transcriptional regulator MerR family
			111	0.006902	0.1394	fp1349	N/A	-9.27	0.067336	63 -- 79	49 -- 67	Putative AAA family ATPase
			112	0.006977	0.1394	fp0754	N/A	-4.79	0.504235	184 -- 205	36 -- 59	Probable Fe-S oxidoreductase N-terminal region
			113	0.006979	0.1394	fp1808	N/A	-11.07	0.023882	175 -- 207	34 -- 67
			114	0.007095	0.1394	fp1017	N/A	-5.83	0.347293	273 -- 286	49 -- 62	Two-component system sensor histidine kinase	fp1019
			115	0.007101	0.1394	fp1181	nusG	-5.37	0.413495	95 -- 110	1 -- 16	Transcription antitermination protein NusG
			116	0.007127	0.1394	fp0078	N/A	-7.87	0.140112	248 -- 263	50 -- 63	Protein of unknown function precursor
			117	0.007144	0.1394	fp1946	N/A	-8.42	0.105946	130 -- 144	46 -- 60	Protein of unknown function precursor
			118	0.007201	0.1394	fp0512	pabA	-6.99	0.212036	179 -- 208	33 -- 62	Para-aminobenzoate/anthranilate synthase glutamine amidotransferase component II
			119	0.007207	0.1394	fp1644	cca	-5.16	0.445874	164 -- 182	50 -- 69	tRNA nucleotidyltransferase
			120	0.007274	0.1395	fp1160	ccoH	-9.53	0.058498	170 -- 209	32 -- 68	Probable cytochrome cbb3 oxidase maturation protein CcoH
			121	0.007344	0.1397	fp0084	N/A	-12.74	0.008195	210 -- 248	33 -- 69
			122	0.007583	0.1413	fp0135	N/A	-5.1	0.454944	217 -- 259	32 -- 67
			123	0.007602	0.1413	fp1802	yghO	-12.91	0.007275	140 -- 155	49 -- 63	Protein of unknown function YghO
			124	0.00763	0.1413	fp1404	N/A	-11.92	0.013965	178 -- 205	36 -- 65	Protein of unknown function precursor
			125	0.007674	0.1413	fp1227	N/A	-12.42	0.010112	176 -- 209	32 -- 65	Probable transcriptional regulator XRE family
			126	0.007889	0.1441	fp1401	N/A	-5.57	0.384306	171 -- 212	29 -- 72	Hypothetical lipoprotein precursor
			127	0.008107	0.1468	fp0108	panC	-8.61	0.095936	248 -- 268	49 -- 68	Pantoate--beta-alanine ligase
			128	0.008304	0.1468	fp2134	N/A	-5.88	0.340308	195 -- 225	6 -- 32
			129	0.008307	0.1468	fp0968	ppx	-6.79	0.232916	181 -- 196	50 -- 64	Exopolyphosphatase
			130	0.008328	0.1468	fp0157	kbl	-5.98	0.3271	236 -- 254	50 -- 68	Glycine C-acetyltransferase
			131	0.008451	0.1468	fp1190	rpsU	-9.08	0.074822	199 -- 223	51 -- 72	30S ribosomal protein S21
			132	0.00851	0.1468	fp0033	ogt1	-4.56	0.543215	91 -- 108	49 -- 72	Methylated-DNA--[protein]-cysteine S-methyltransferase
			133	0.008546	0.1468	fp2103	yyaL	-12.74	0.008192	232 -- 273	7 -- 63	Protein of unknown function YyaL
			134	0.00876	0.1468	fp0184	N/A	-9.37	0.063816	188 -- 198	52 -- 62	Probable protein chain release factor
			135	0.008842	0.1468	fp1931	ndh	-8.99	0.078781	164 -- 187	49 -- 73	NADH dehydrogenase
			136	0.008933	0.1468	fp0508	trpB	-8.56	0.098691	4 -- 18	49 -- 62	Tryptophan synthase beta subunit
			137	0.008977	0.1468	fp0279	dxs	-7	0.211966	64 -- 100	34 -- 66	1-deoxy-D-xylulose-5-phosphate synthase
			138	0.009058	0.1468	fp0046	hemH	-6.77	0.234232	156 -- 187	34 -- 62	Ferrochelatase
			139	0.009069	0.1468	fp1924	N/A	-7.96	0.134129	170 -- 208	33 -- 67
			140	0.009109	0.1468	fp0125	N/A	-7.71	0.151137	111 -- 127	50 -- 67
			141	0.009192	0.1468	fp0147	prsA	-9.57	0.057301	176 -- 191	49 -- 64	Ribose-phosphate diphosphokinase
			142	0.009226	0.1468	fp0218	dksA	-7.81	0.144239	67 -- 91	43 -- 67	DnaK suppressor protein
			143	0.009237	0.1468	fp2235	haaO	-5.91	0.33687	262 -- 268	11 -- 17	3-hydroxyanthranilate 3 4-dioxygenase
			144	0.009242	0.1468	fp2362	N/A	-11.92	0.013969	112 -- 125	50 -- 63	Probable membrane-associated phospholipid phosphatase
			145	0.009249	0.1468	fp2396	N/A	-7.75	0.148109	167 -- 210	31 -- 74	Probable S8 subtilisin family serine endopeptidase precursor
			146	0.0094	0.1474	fp2197	N/A	-8.23	0.11707	286 -- 299	49 -- 63
			147	0.009419	0.1474	fp0104	radA	-9.73	0.05237	174 -- 186	50 -- 62	DNA repair protein RadA
			148	0.009503	0.1477	fp2361	N/A	-11.66	0.016476	1 -- 19	49 -- 66	Hypothetical protein precursor
			149	0.009776	0.1487	fp0684	N/A	-6.33	0.283163	226 -- 237	63 -- 74	Probable outer membrane protein precursor OmpA family
			150	0.009803	0.1487	fp1219	yqfO	-7.33	0.181307	185 -- 208	33 -- 60	Protein of unknown function YqfO
			151	0.009912	0.1487	fp0337	pdhB	-5.38	0.4114	6 -- 24	49 -- 69	Pyruvate dehydrogenase E1 component beta subunit
			152	0.009937	0.1487	fp1704	pdxH	-12.04	0.012968	141 -- 175	42 -- 74	Pyridoxamine 5'-phosphate oxidase
			153	0.009948	0.1487	fp1480	N/A	-10.25	0.038916	174 -- 207	34 -- 63	Protein of unknown function containing ankyrin repeat signature
			154	0.00995	0.1487	fp1332	rplP	-5.67	0.36964	201 -- 220	49 -- 70	50S ribosomal protein L16
			155	0.01015	0.1502	fp2125	ruvB	-9.16	0.071769	212 -- 236	49 -- 73	Holliday junction DNA helicase RuvB
			156	0.01021	0.1502	fp0615	trxB1	-11.5	0.018232	199 -- 221	50 -- 72	Thioredoxin-disulfide reductase
			157	0.01025	0.1502	fp1898	N/A	-9.68	0.053904	11 -- 24	49 -- 62
			158	0.01038	0.1511	fp1866	relA	-2.02	0.911817	167 -- 173	60 -- 66	GTP diphosphokinase
			159	0.0105	0.1519	fp1734	N/A	-5.8	0.351503	54 -- 74	49 -- 66	Probable transcriptional regulator AsnC family
			160	0.01065	0.1527	fp1006	ybcL	-9.29	0.066868	88 -- 102	44 -- 58	Probable phospholipid-binding protein precursor YbcL
			161	0.01068	0.1527	fp1064	mur/alr	-9.17	0.071142	91 -- 114	49 -- 72	Bifunctional enzyme : Mur ligase domain protein and alanine racemase
			162	0.01104	0.1568	fp1206	acdS	-8.89	0.082988	248 -- 273	29 -- 62	1-aminocyclopropane-1-carboxylate deaminase
			163	0.01112	0.1569	fp1925	N/A	-6.39	0.276023	193 -- 230	33 -- 62	Glu/Leu/Phe/Val dehydrogenase family protein
			164	0.01124	0.1569	fp0447	ilvH	-4.38	0.573682	69 -- 81	26 -- 38	acetolactate synthase small subunit
			165	0.01126	0.1569	fp1375	N/A	-4.69	0.521146	147 -- 153	11 -- 17	Probable transmembrane protein of unknown function
			166	0.01132	0.1569	fp1842	N/A	-11.94	0.013861	84 -- 119	32 -- 66
			167	0.01154	0.159	fp1005	N/A	-10.72	0.029374	278 -- 292	49 -- 63	Probable transcriptional regulator AraC family	fp1757
			168	0.01174	0.1608	fp0739	rocD	-4.97	0.475407	271 -- 280	7 -- 16	Ornithine--oxo-acid transaminase
			169	0.01193	0.1615	fp1665	mutY	-10.39	0.035857	173 -- 205	36 -- 74	A/G-specific adenine glycosylase
			170	0.012	0.1615	fp0164	pyrC1	-7.68	0.15396	190 -- 200	49 -- 59	Dihydroorotase
			171	0.012	0.1615	fp1151	N/A	-4.54	0.546047	35 -- 63	34 -- 59	Hypothetical protein
			172	0.01215	0.1626	fp0572	argK	-3.47	0.724366	226 -- 245	49 -- 63	Transport binding protein kinase ArgK
			173	0.01277	0.1688	fp1855	yfkH	-5.47	0.399097	195 -- 204	37 -- 46	Protein of unknown function YfkH
			174	0.01283	0.1688	fp2363	leuS	-6.26	0.29254	68 -- 74	56 -- 62	Leucine--tRNA ligase
			175	0.01284	0.1688	fp1645	ctaA	-8.97	0.07964	165 -- 195	29 -- 59	Cytochrome c oxidase assembly protein
			176	0.01334	0.1744	fp1119	udk	-6.99	0.212623	55 -- 61	56 -- 62	Uridine kinase
			177	0.01349	0.1745	fp2101	N/A	-9.63	0.055397	167 -- 204	37 -- 68	Protein of unknown function precursor
			178	0.0135	0.1745	fp1060	N/A	-6.06	0.316435	109 -- 132	37 -- 63
			179	0.01365	0.1754	fp1756	N/A	-3.9	0.6545	189 -- 207	34 -- 63	Protein of unknown function precursor
			180	0.01372	0.1754	fp1170	N/A	-7.22	0.191573	186 -- 207	34 -- 58	Protein of unknown function precursor	fp2512
			181	0.01381	0.1755	fp0174	N/A	-8.31	0.112038	107 -- 124	49 -- 63	Probable cell surface protein (Leucine-rich repeat protein) precursor	fp0178 fp0177 fp0171 fp0170 fp0180 fp0176 fp0169 fp0179 fp0172 fp0173 fp0168 fp0166 fp0175 fp0167 fp0082
			182	0.01409	0.1772	fp2023	hemK	-8.6	0.096811	12 -- 32	51 -- 70	Methylase of polypeptide chain release factors
			183	0.0141	0.1772	fp2494	glnS	-8.08	0.126034	199 -- 219	49 -- 72	Glutamine--tRNA ligase
			184	0.01436	0.1781	fp1730	katG	-10.88	0.026783	181 -- 207	34 -- 59	Bi-functional catalase-peroxidase
			185	0.01441	0.1781	fp1141	N/A	-8.66	0.093582	264 -- 292	34 -- 67	Probable lipoprotein precursor
			186	0.01446	0.1781	fp1807	N/A	-10.04	0.043814	273 -- 295	55 -- 68	Probable tRNA/rRNA methyltransferase
			187	0.01447	0.1781	fp0350	N/A	-11	0.024839	245 -- 257	50 -- 62
			188	0.01459	0.1786	fp1189	xerC	-7.25	0.188628	197 -- 216	57 -- 74	Tyrosine recombinase XerC
			189	0.01485	0.1808	fp1028	bfmBA	-8.07	0.126919	226 -- 234	53 -- 61	3-methyl-2-oxobutanoate dehydrogenase (2-methylpropanoyl-transferring)
			190	0.01494	0.181	fp0931	N/A	-11.87	0.014434	240 -- 270	49 -- 72	Probable membrane fusion efflux lipoprotein precursor
			191	0.01506	0.1815	fp1301	N/A	-8.22	0.117539	1 -- 14	49 -- 62	Sodium:solute symporter
			192	0.01521	0.1822	fp2198	N/A	-10.08	0.042938	287 -- 297	53 -- 63	Putative methyltransferase
			193	0.01529	0.1822	fp0590	bfmBB	-7.11	0.201484	174 -- 184	49 -- 59	Dihydrolipoyllysine-residue (2-methylpropanoyl)transferase
			194	0.01536	0.1822	fp1765	clpB	-6.71	0.240685	29 -- 46	56 -- 74	ATPase with chaperone activity ATP-binding subunit
			195	0.01567	0.1846	fp1419	N/A	-7.24	0.189763	132 -- 150	30 -- 47
			196	0.01578	0.1846	fp2243	recX	-4.49	0.554052	13 -- 29	49 -- 66	Regulatory protein RecX
			197	0.0158	0.1846	fp1720	fadD	-10.83	0.027597	232 -- 252	49 -- 66	Long-chain-fatty-acid--CoA ligase
			198	0.01599	0.1859	fp0675	N/A	-7.69	0.152874	263 -- 300	31 -- 69	Probable transcriptional regulator PadR family
			199	0.01625	0.1879	fp1663	gldD	-3.94	0.647148	131 -- 146	51 -- 67	Gliding motility lipoprotein precursor GldD
			200	0.01648	0.1896	fp1525	N/A	-11.72	0.015941	120 -- 157	30 -- 68	Probable CRISPR-associated (Cas) protein. Cas 1 family

## Sheet: Rfp31
Locustag=THC0290_N_0450			OUTPUT
Name=Rfp31
INPUT_sequence	Genome_blastn_eval		Rank	CopraRNA p-value	CopraRNA fdr value	Locus Tag	Gene Name	Energy [kcal/mol]	IntaRNA p-value	Position mRNA	Position sRNA	Annotation	Additional homologs
>NC_009613	Flavobacterium psychrophilum JIP02/86 strain=JIP02/86 eval=3.96e-24		2	8.485e-05	0.07081	fp0855	N/A	-16.92	0.000124	214 -- 252	33 -- 71	Probable two-component system response regulatory protein
ATACCAGAAAATAATTATTTGCTCTGGATAACAAATTTCACTTTGTTAAGTGTTCAGAATTAGTATATTTGCACC			4	0.0001768	0.1016	fp0709	N/A	-15.48	0.000481	140 -- 168	44 -- 72	Putative phosphoesterase
>NC_016510	Flavobacterium columnare ATCC 49512 strain=ATCC 49512 eval=8.83e-05		9	0.0008669	0.2214	fp0467	uspA	-14.5	0.001136	79 -- 92	61 -- 74	Universal stress protein UspA
AACAATTCACTTTGTAGAGTGTTCATAATTACTATATTTGCA			7	0.0007779	0.2214	fp0343	N/A	-14.41	0.001225	57 -- 69	63 -- 75	Probable lipoprotein precursor
>NZ_CP007627	Flavobacterium psychrophilum strain=CSF259-93 eval=3.96e-24		11	0.001165	0.2434	fp0489	bmgA	-14.16	0.001506	161 -- 231	2 -- 72	Probable mobilization protein BmgA
ATACCAGAAAATAATTATTTGCTCTGGATAACAAATTTCACTTTGTTAAGTGTTCAGAATTAGTATATTTGCACC			12	0.001393	0.2485	fp1454	N/A	-13.96	0.001786	106 -- 159	21 -- 73	Probable transmembrane protein of unknown function; putative anti ECF-type sigma factor
>NZ_CP008902	Flavobacterium psychrophilum strain=950106-1/1 eval=3.96e-24		14	0.001839	0.2701	fp2505	N/A	-13.63	0.002327	256 -- 286	41 -- 72	Hypothetical protein
ATACCAGAAAATAATTATTTGCTCTGGATAACAAATTTCACTTTGTTAAGTGTTCAGAATTAGTATATTTGCACC			53	0.00856	0.3701	fp2097	skp	-13.34	0.002933	215 -- 239	49 -- 73	Outer membrane chaperone precursor Skp (OmpH)
>NZ_CP015107	Flavobacterium columnare strain=C#2 eval=3.28e-05		21	0.002618	0.2701	fp0700	N/A	-13.21	0.003258	232 -- 264	36 -- 72
TAACAATTCACTTTGTGGAGTGTTCATAATTACTATATTTGCA			22	0.002812	0.2701	fp0592	N/A	-13.13	0.003488	266 -- 288	49 -- 71	Hypothetical protein
			23	0.00282	0.2701	fp0280	N/A	-13.12	0.003497	40 -- 63	50 -- 72	Probable M36 fungalysin family metalloprotease precursor	fp0281
			24	0.00282	0.2701	fp0280	N/A	-13.12	0.003497	40 -- 63	50 -- 72	Probable M36 fungalysin family metalloprotease precursor	fp0281
			28	0.003744	0.3074	fp1400	proS	-12.78	0.004583	222 -- 248	1 -- 25	Proline--tRNA ligase
Sequence alignment was produced using Multalin tool using default parameters (http://multalin.toulouse.inra.fr/multalin/multalin.html).			29	0.004291	0.329	fp1206	acdS	-12.61	0.00522	117 -- 142	49 -- 73	1-aminocyclopropane-1-carboxylate deaminase
			34	0.005119	0.3461	fp0323	fbaA	-12.39	0.006176	108 -- 139	32 -- 64	Fructose-bisphosphate aldolase
			25	0.003337	0.3069	fp0454	rpsB	-12.38	0.006198	237 -- 257	50 -- 72	30S ribosomal protein S2
			36	0.005636	0.3599	fp0669	natA	-12.27	0.00677	112 -- 160	40 -- 71	Probable ABC-type Na(+)-transporting system ATPase component
			1	8.184e-05	0.07081	fp0802	N/A	-12.21	0.007062	23 -- 59	36 -- 75
			37	0.005892	0.36	fp2368	pop	-12.21	0.007063	210 -- 226	49 -- 66	Prolyl oligopeptidase family protein precursor
			38	0.005997	0.36	fp0216	N/A	-12.19	0.007183	38 -- 57	56 -- 75	Protein of unknown function precursor
			39	0.006112	0.36	fp0939	N/A	-12.16	0.007315	89 -- 107	55 -- 73	Glycosyl transferase group 1 family protein
			6	0.0006493	0.2214	fp0586	N/A	-11.97	0.008484	166 -- 186	52 -- 71
			42	0.007209	0.3701	fp1719	mrsB2	-11.95	0.008563	81 -- 93	55 -- 67	Probable protein-methionine-S-oxide reductase MrsB2
			44	0.00769	0.3701	fp1429	tpiA	-11.92	0.008806	172 -- 223	4 -- 72	Triose-phosphate isomerase
The use of three sRNA homologs with some degree of divergence is mandatory for CopraRNA tool.			20	0.002355	0.2701	fp0862	N/A	-11.81	0.009512	47 -- 69	50 -- 72	Rhomboid family protein
If this criteria is true, the list of putative sRNA targets is ranked based on CopraRNA p-value. If not, the list is ranked based on IntaRNA p-value.			51	0.008515	0.3701	fp1241	N/A	-11.74	0.010038	260 -- 284	49 -- 72	Probable transmembrane protein of unknown function
			54	0.008694	0.3701	fp0156	N/A	-11.71	0.010239	187 -- 247	4 -- 71	Outer membrane protein precursor; OmpA family P60
			52	0.008554	0.3701	fp2383	ribE	-11.68	0.010445	153 -- 176	50 -- 72	Riboflavin synthase alpha subunit
			49	0.008426	0.3701	fp2227	nuoF	-11.68	0.010465	122 -- 135	42 -- 55	NADH dehydrogenase I F subunit
			19	0.002334	0.2701	fp0150	N/A	-11.62	0.010973	79 -- 105	52 -- 74	ArgE/DapE/Acy1 family protein
			16	0.00217	0.2701	fp0334	N/A	-11.61	0.01104	255 -- 279	51 -- 75
			57	0.009963	0.4018	fp2028	N/A	-11.53	0.011662	139 -- 165	49 -- 75	Transmembrane protein of unknown function DedA family
			8	0.0008119	0.2214	fp0238	rbfA	-11.5	0.011951	231 -- 274	35 -- 75	Ribosome-binding factor A
			58	0.01033	0.4018	fp1990	N/A	-11.48	0.012071	233 -- 252	52 -- 71	acyl-CoA thioesterase
			59	0.01038	0.4018	fp2475	N/A	-11.48	0.012131	227 -- 260	41 -- 72	Glycosyl transferase group 2 family protein
			61	0.01092	0.4059	fp1349	N/A	-11.44	0.012464	15 -- 36	34 -- 54	Putative AAA family ATPase
			62	0.01095	0.4059	fp1002	N/A	-11.41	0.01276	52 -- 63	64 -- 75	Carboxyltransferase
			63	0.01118	0.4077	fp1872	icd	-11.38	0.013018	265 -- 289	34 -- 58	Isocitrate dehydrogenase (NADP+)
			64	0.01166	0.4077	fp2196	N/A	-11.32	0.013548	79 -- 93	61 -- 75
			41	0.006704	0.3701	fp1986	N/A	-11.23	0.014502	104 -- 124	56 -- 74	Probable transmembrane protein of unknown function
			72	0.01318	0.4188	fp0486	N/A	-11.16	0.015235	67 -- 80	59 -- 72	Protein of unknown function. Probable truncated protein
			18	0.002315	0.2701	fp2348	N/A	-11.16	0.015241	140 -- 175	37 -- 74	Probable oxidoreductase
			35	0.005363	0.3523	fp0610	tgt	-11.15	0.015345	241 -- 254	14 -- 27	Queuine tRNA-ribosyltransferase
			73	0.0133	0.4188	fp0522	phuR	-11.15	0.015367	270 -- 289	54 -- 75	Probable TonB-dependent outer membrane hemin receptor precursor PhuR
			26	0.003492	0.3074	fp1933	N/A	-11.11	0.015768	89 -- 141	18 -- 67	Probable transmembrane protein of unknown function; putative anti ECF-type sigma factor
			75	0.01447	0.4302	fp1916	miaA	-11.04	0.016653	192 -- 215	44 -- 65	tRNA isopentenyltransferase
			50	0.008492	0.3701	fp1270	N/A	-10.92	0.018081	160 -- 181	50 -- 71	Probable ABC-type polysaccharide/polyol phosphate transport system permease component
			46	0.008077	0.3701	fp1666	hupA	-10.88	0.018585	12 -- 36	6 -- 27	Histone-like bacterial DNA-binding protein HU-alpha
			85	0.01636	0.4404	fp2340	N/A	-10.87	0.018732	171 -- 187	49 -- 65	Hypothetical protein
			69	0.01255	0.4182	fp1426	N/A	-10.86	0.018844	64 -- 94	1 -- 32
			86	0.01651	0.4404	fp1080	N/A	-10.86	0.018898	129 -- 148	42 -- 61	Probable short-chain type dehydrogenase
			88	0.01743	0.4404	fp0515	N/A	-10.78	0.019902	189 -- 208	50 -- 71	Nitroreductase
			89	0.01771	0.4404	fp2381	N/A	-10.76	0.020205	24 -- 67	16 -- 72
			91	0.01792	0.4404	fp1516	N/A	-10.74	0.020437	122 -- 149	48 -- 75	Two-component system sensor histidine kinase
			92	0.01792	0.4404	fp1516	N/A	-10.74	0.020437	122 -- 149	48 -- 75	Two-component system sensor histidine kinase
			94	0.0181	0.4404	fp0152	N/A	-10.73	0.020629	278 -- 298	50 -- 71
			55	0.008901	0.3721	fp2579	N/A	-10.6	0.022558	53 -- 63	63 -- 73	Probable transposase
			105	0.02193	0.4803	fp0335	etfA	-10.46	0.024789	136 -- 153	3 -- 21	Electron transfer flavoprotein alpha subunit
			109	0.02286	0.4821	fp1729	N/A	-10.41	0.025785	233 -- 254	53 -- 73	Probable peroxiredoxin
			112	0.02352	0.4828	fp2420	pbpA	-10.37	0.026502	271 -- 289	50 -- 73	Penicillin-binding protein 2. Peptidoglycan glycosyltransferase
			113	0.02401	0.4868	fp0868	uvrD	-10.34	0.027029	202 -- 231	41 -- 73	ATP-dependent DNA helicase UvrD
			116	0.02456	0.4868	fp2488	rpiB	-10.31	0.027623	152 -- 167	56 -- 72	Ribose 5-phosphate isomerase
			10	0.001112	0.2434	fp1078	N/A	-10.28	0.028037	186 -- 208	50 -- 72	Probable M42 family peptidase
			90	0.01786	0.4404	fp1014	phrB1	-10.28	0.028125	198 -- 216	3 -- 21	Deoxyribodipyrimidine photolyase PhrB1
			96	0.01856	0.4404	fp1388	porU	-10.25	0.028798	8 -- 26	4 -- 22	Por secretion system protein PorU precursor
			118	0.02577	0.4965	fp1922	fhuA	-10.24	0.028915	203 -- 221	57 -- 74	Probable TonB-dependent outer membrane ferrichrome-iron receptor precursor FhuA
			111	0.0234	0.4828	fp1788	N/A	-10.23	0.029114	35 -- 52	57 -- 72
			68	0.01238	0.4182	fp0603	ftsH	-10.19	0.029962	287 -- 296	3 -- 12	Cell division protein FtsH
			122	0.02694	0.4983	fp1640	gmd	-10.18	0.030177	240 -- 275	38 -- 75	GDP-mannose 4 6-dehydratase
			123	0.027	0.4983	fp0031	N/A	-10.17	0.030237	248 -- 274	4 -- 36	Probable transmembrane protein of unknown function
			81	0.01516	0.4302	fp1069	N/A	-10.17	0.030401	195 -- 238	4 -- 47	Probable transmembrane protein of unknown function
			99	0.01977	0.4544	fp2466	N/A	-10.1	0.031808	72 -- 91	49 -- 71
			95	0.01846	0.4404	fp1765	clpB	-10.06	0.03262	281 -- 299	50 -- 72	ATPase with chaperone activity ATP-binding subunit
			32	0.004747	0.341	fp1202	lysS	-10	0.033943	240 -- 294	5 -- 57	Lysine--tRNA ligase
			67	0.01188	0.4077	fp1704	pdxH	-9.97	0.034598	54 -- 75	49 -- 72	Pyridoxamine 5'-phosphate oxidase
			70	0.01294	0.4188	fp0962	N/A	-9.95	0.035242	88 -- 105	57 -- 73	Probable phosphoglycerol transferase
			97	0.01858	0.4404	fp0513	trpE	-9.95	0.035243	1 -- 32	52 -- 73	Anthranilate synthase component I
			93	0.01796	0.4404	fp0348	gmk	-9.93	0.035483	40 -- 59	52 -- 73	Guanylate kinase
			101	0.02011	0.4544	fp2333	N/A	-9.9	0.036215	113 -- 132	50 -- 72	Probable S41A family C-terminal processing peptidase precursor
			132	0.03322	0.5528	fp1203	N/A	-9.88	0.036873	109 -- 131	33 -- 57	Hypothetical protein precursor
			17	0.002291	0.2701	fp2385	N/A	-9.87	0.036936	13 -- 33	49 -- 73
			135	0.03375	0.5528	fp2356	N/A	-9.85	0.03743	173 -- 195	52 -- 73	Hypothetical protein
			102	0.02016	0.4544	fp1443	aroK	-9.84	0.037863	93 -- 138	31 -- 75	Shikimate kinase
			106	0.02265	0.4821	fp0192	mfd	-9.83	0.037935	183 -- 208	50 -- 73	Transcription-repair coupling factor
			137	0.03427	0.5528	fp1030	N/A	-9.83	0.037981	93 -- 107	50 -- 64
			104	0.02182	0.4803	fp0764	N/A	-9.81	0.038472	252 -- 275	51 -- 72	ThiJ/PfpI family protein
			140	0.03505	0.5528	fp1088	N/A	-9.8	0.038808	147 -- 172	44 -- 67	Probable methyltransferase
			141	0.0351	0.5528	fp1637	wbhW	-9.8	0.038861	216 -- 237	49 -- 73	Protein of unknown function WbhW
			142	0.0351	0.5528	fp1637	wbhW	-9.8	0.038861	216 -- 237	49 -- 73	Protein of unknown function WbhW
			143	0.03521	0.5528	fp0500	N/A	-9.79	0.038978	273 -- 300	35 -- 70	Protein of unknown function precursor
			30	0.004294	0.329	fp2070	nadE	-9.79	0.039115	165 -- 175	63 -- 73	NH(3)-dependent NAD(+) synthetase
			145	0.03592	0.5528	fp1687	N/A	-9.76	0.03973	245 -- 277	38 -- 73	Probable two-component system sensor histidine kinase
			148	0.03638	0.5528	fp0349	N/A	-9.75	0.040225	178 -- 210	32 -- 73
			147	0.03622	0.5528	fp0768	yuxK	-9.72	0.040961	192 -- 213	50 -- 73	Protein of unknown function YuxK
			153	0.03775	0.5528	fp0232	fpp2	-9.69	0.041671	142 -- 167	48 -- 74	Psychrophilic metalloprotease Fpp2 precursor
			154	0.03775	0.5528	fp0232	fpp2	-9.69	0.041671	142 -- 167	48 -- 74	Psychrophilic metalloprotease Fpp2 precursor
			125	0.0271	0.4983	fp2082	N/A	-9.69	0.041862	29 -- 56	40 -- 72	Probable membrane-associated phospholipid phosphatase
			159	0.03858	0.5528	fp0193	N/A	-9.66	0.042544	100 -- 119	56 -- 73	Probable transmembrane protein of unknown function
			162	0.03914	0.5528	fp1441	tpm	-9.64	0.043135	23 -- 59	36 -- 75	Probable thiopurine S-methyltransferase
			157	0.03809	0.5528	fp1228	mscS3	-9.63	0.043376	246 -- 260	58 -- 72	Probable small-conductance mechanosensitive ion channel MscS3
			166	0.04048	0.5582	fp2245	recA	-9.59	0.044546	73 -- 117	42 -- 71	Recombinase A
			79	0.01499	0.4302	fp2308	N/A	-9.57	0.045164	33 -- 43	65 -- 75	Protein of unknown function precursor
			146	0.03601	0.5528	fp2308	N/A	-9.57	0.045164	33 -- 43	65 -- 75	Protein of unknown function precursor
			169	0.04106	0.5582	fp2308	N/A	-9.57	0.045164	33 -- 43	65 -- 75	Protein of unknown function precursor
			170	0.04128	0.5582	fp0306	N/A	-9.57	0.045233	11 -- 28	57 -- 75
			136	0.03398	0.5528	fp1283	wcgN	-9.55	0.045603	41 -- 54	63 -- 75	Putative undecaprenyl-phosphate glycosyl-1-phosphate transferase
			107	0.02266	0.4821	fp1817	N/A	-9.54	0.046132	263 -- 276	2 -- 16	Protein of unknown function precursor
			177	0.04307	0.5594	fp1473	lpxK	-9.5	0.047276	39 -- 55	4 -- 20	Tetraacyldisaccharide 4'-kinase
			178	0.04393	0.5597	fp1285	fnlC	-9.46	0.048356	63 -- 86	50 -- 73	FnlC protein involved in UDP-L-FucpNAc biosynthesis (a nucleotide sugar precursor for antigen-O bisynthesis). Probable UDP-2-acetamino-2 6-dideoxy-L-talose 2-epimerase
			181	0.04447	0.5597	fp2155	N/A	-9.45	0.048743	273 -- 299	50 -- 75	Protein of unknown function; putative pseudogene N-terminal region
			184	0.0454	0.5597	fp2458	atpA	-9.42	0.049719	245 -- 264	52 -- 72	ATP synthase alpha subunit
			185	0.04549	0.5597	fp1582	panE	-9.42	0.049811	8 -- 34	49 -- 75	2-dehydropantoate 2-reductase
			48	0.008386	0.3701	fp0126	N/A	-9.38	0.05114	161 -- 245	3 -- 73	Probable transmembrane protein of unknown function
			189	0.04685	0.5597	fp0430	thiD	-9.37	0.051243	270 -- 292	51 -- 72	Phosphomethylpyrimidine kinase
			190	0.04744	0.5597	fp0485	N/A	-9.36	0.051857	1 -- 25	51 -- 72
			191	0.04752	0.5597	fp2042	N/A	-9.35	0.051943	22 -- 33	36 -- 47	Protein of unknown function related to deoxyribodipyrimidine photolyase
			192	0.04776	0.5597	fp0904	N/A	-9.35	0.052196	115 -- 135	50 -- 67
			195	0.04826	0.5597	fp0574	glcD	-9.33	0.052718	128 -- 137	52 -- 61	(S)-2-hydroxy-acid oxidase
			197	0.04837	0.5597	fp1697	N/A	-9.33	0.052835	215 -- 232	56 -- 73	Protein of unknown function precursor
			83	0.0158	0.4346	fp1517	N/A	-9.31	0.053272	134 -- 159	49 -- 73	Two-component system response regulatory protein LytTR family
			198	0.04971	0.5597	fp1938	N/A	-9.29	0.054235	158 -- 186	47 -- 72	Putative plasmid stabilization system protein
			200	0.04984	0.5597	fp0595	N/A	-9.28	0.054363	62 -- 80	57 -- 75	Protein of unknown function precursor; putative adhesin
			114	0.02427	0.4868	fp2080	rlmN	-9.24	0.05579	22 -- 32	2 -- 12	23S rRNA (adenine(2503)-C(2))-methyltransferase RlmN
			139	0.03494	0.5528	fp2267	N/A	-9.22	0.056555	94 -- 118	50 -- 75	Acyl carrier protein
			100	0.01981	0.4544	fp2005	N/A	-9.22	0.056745	87 -- 98	64 -- 75
			15	0.001949	0.2701	fp1827	rprX	-9.15	0.059272	220 -- 245	48 -- 72	Two-component system sensor histidine kinase RprX
			167	0.04084	0.5582	fp2483	N/A	-9.14	0.059532	91 -- 117	50 -- 72	Probable transmembrane protein of unknown function
			155	0.03804	0.5528	fp2334	N/A	-9.1	0.06106	27 -- 48	50 -- 72	Probable transmembrane protein of unknown function
			108	0.02267	0.4821	fp0861	N/A	-9.1	0.061138	48 -- 60	60 -- 72	Putative lipid A biosynthesis acyltransferase
			193	0.0478	0.5597	fp0189	ahcY	-9.01	0.064681	185 -- 208	50 -- 71	adenosylhomocysteinase
			180	0.04446	0.5597	fp1954	phhA	-8.97	0.066235	283 -- 292	63 -- 72	Phenylalanine 4-monooxygenase
			183	0.04477	0.5597	fp2066	pcbD	-8.97	0.066291	223 -- 255	37 -- 72	Probable 2-hydroxy-6-oxo-6-phenylhexa-2 4-dienoic acid hydrolase
			187	0.04612	0.5597	fp0889	N/A	-8.94	0.067685	148 -- 170	49 -- 72	Probable transmembrane protein of unknown function
			103	0.02077	0.4636	fp1669	N/A	-8.85	0.071498	172 -- 190	15 -- 32	NifU-like protein
			56	0.00928	0.381	fp0585	N/A	-8.79	0.074347	203 -- 212	66 -- 75
			160	0.03892	0.5528	fp1892	gldI	-8.74	0.076533	154 -- 165	54 -- 65	Gliding motility lipoprotein precursor GldI
			151	0.03689	0.5528	fp1269	rfbB	-8.73	0.076962	151 -- 173	50 -- 74	Probable ABC-type polysaccharide/polyol phosphate transport system ATPase component
			182	0.04464	0.5597	fp1805	purB	-8.71	0.078021	202 -- 224	49 -- 73	adenylosuccinate lyase
			168	0.04089	0.5582	fp2122	ruvA	-8.68	0.079603	281 -- 299	50 -- 73	Holliday junction DNA helicase RuvA
			172	0.04184	0.5589	fp0633	mrsA	-8.64	0.081239	125 -- 148	29 -- 56	Peptide methionine sulfoxide reductase MsrA
			174	0.04266	0.5593	fp1609	yojE	-8.45	0.091709	202 -- 254	21 -- 73	Probable permease YojE
			117	0.02525	0.4961	fp1751	N/A	-8.41	0.093703	172 -- 191	55 -- 74	Putative Holliday junction resolvase
			171	0.04167	0.5589	fp1082	fjo14	-8.4	0.094104	221 -- 231	55 -- 65	Protein of unknown function Fjo14
			31	0.004688	0.341	fp1182	secE	-8.29	0.100781	46 -- 66	50 -- 70	Preprotein translocase SecE subunit
			128	0.02972	0.5337	fp1764	N/A	-8.29	0.100862	121 -- 140	50 -- 73	Probably involved in regulation of translation initiation
			130	0.0327	0.5528	fp2259	N/A	-8.26	0.102499	19 -- 77	1 -- 75	Probable dehydratase
			152	0.03746	0.5528	fp1178	rplJ	-8.19	0.106901	276 -- 291	52 -- 72	50S ribosomal protein L10
			43	0.007232	0.3701	fp1987	rpmH	-8.18	0.107671	70 -- 82	60 -- 72	50S ribosomal protein L34
			65	0.01183	0.4077	fp2269	N/A	-8.14	0.110494	291 -- 300	2 -- 11	3-oxoacyl-(acyl-carrier-protein) synthase
			134	0.03327	0.5528	fp0398	N/A	-8.11	0.112176	126 -- 156	42 -- 71	Probable bifunctional protein : 2-amino-4-hydroxy-6-hydroxymethyldihydropteridine diphosphokinase and deoxynucleoside kinase
			40	0.006263	0.36	fp1326	rpsN	-8.1	0.112733	248 -- 265	60 -- 75	30S ribosomal protein S14
			82	0.01534	0.4302	fp1670	trxB2	-8.02	0.118641	211 -- 233	51 -- 71	Thioredoxin-disulfide reductase
			27	0.00361	0.3074	fp0845	N/A	-7.95	0.122922	213 -- 231	41 -- 61
			3	9.24e-05	0.07081	fp2434	N/A	-7.94	0.123662	114 -- 125	64 -- 75	Putative transcriptional regulator
			98	0.01891	0.4435	fp0787	N/A	-7.94	0.123691	82 -- 99	50 -- 64
			163	0.03919	0.5528	fp2108	N/A	-7.91	0.125959	218 -- 233	50 -- 65	Cytochrome c oxidase family protein
			164	0.03949	0.5536	fp1718	mrsB1	-7.9	0.12719	8 -- 17	63 -- 72	Probable protein-methionine-S-oxide reductase MrsB1
			127	0.0292	0.5287	fp1174	N/A	-7.89	0.12735	229 -- 267	33 -- 71
			33	0.00498	0.3461	fp2417	mreB	-7.82	0.132642	154 -- 175	44 -- 65	Rod shape-determining protein MreB
			158	0.03853	0.5528	fp1079	purC	-7.75	0.138249	172 -- 208	50 -- 73	Phosphoribosylaminoimidazolesuccinocarboxamide synthase
			120	0.02592	0.4965	fp0618	N/A	-7.68	0.144392	34 -- 60	47 -- 72	Probable transmembrane protein of unknown function
			188	0.04669	0.5597	fp2060	mraY	-7.63	0.148243	97 -- 134	42 -- 73	Phospho-N-acetylmuramoyl-pentapeptide- transferase
			66	0.01186	0.4077	fp0158	N/A	-7.62	0.14899	236 -- 251	56 -- 73
			78	0.01477	0.4302	fp1433	rpmB	-7.48	0.161584	265 -- 283	36 -- 56	50S ribosomal protein L28
			71	0.01314	0.4188	fp1304	N/A	-7.46	0.162984	270 -- 285	7 -- 22
			196	0.04836	0.5597	fp0863	N/A	-7.45	0.164042	282 -- 298	4 -- 21	Protein of unknown function precursor
			77	0.01464	0.4302	fp0272	N/A	-7.35	0.173433	57 -- 66	63 -- 72	Protein of unknown function precursor
			124	0.02708	0.4983	fp1934	N/A	-7.3	0.178663	232 -- 244	56 -- 68	Probable acyltransferase
			149	0.03649	0.5528	fp0025	mrcA	-7.29	0.179192	213 -- 221	49 -- 57	Penicillin-binding protein 1A
			80	0.01505	0.4302	fp1732	N/A	-7.25	0.183096	195 -- 211	57 -- 72	Probable amino acid-transporting permease
			165	0.03984	0.5551	fp0871	N/A	-7.2	0.188382	2 -- 17	42 -- 55	Cysteine synthase/cystathionine beta-synthase family protein
			121	0.02616	0.4971	fp2393	sufB	-7.18	0.189928	28 -- 36	4 -- 12	Fe-S assembly protein SufB
			110	0.02308	0.4823	fp0986	N/A	-7.14	0.194307	201 -- 209	66 -- 74	Probable modification methyltransferase
			144	0.03561	0.5528	fp2570	N/A	-7.08	0.200745	152 -- 163	60 -- 71	Transposase IS1182 family	fp2569
			175	0.04275	0.5593	fp2021	hisS	-6.99	0.210572	259 -- 273	57 -- 72	Histidine--tRNA ligase
			47	0.008141	0.3701	fp0111	glmS	-6.99	0.210702	32 -- 43	54 -- 64	Glucosamine--fructose-6-phosphate aminotransferase [isomerizing]
			76	0.0145	0.4302	fp1665	mutY	-6.88	0.223467	109 -- 124	58 -- 73	A/G-specific adenine glycosylase
			161	0.03901	0.5528	fp0631	N/A	-6.87	0.225031	204 -- 225	52 -- 72
			199	0.04978	0.5597	fp2330	lpxB	-6.78	0.235016	1 -- 18	53 -- 70	Lipid-A-disaccharide synthase
			194	0.04803	0.5597	fp0536	yajC	-6.75	0.238894	189 -- 204	4 -- 21	Preprotein translocase YajC subunit
			176	0.04282	0.5593	fp0146	rplY	-6.68	0.248298	53 -- 70	50 -- 73	50S ribosomal protein L25/general stress protein Ctc
			84	0.01588	0.4346	fp1904	N/A	-6.53	0.26778	70 -- 86	51 -- 66	Putative muramidase precursor
			126	0.02848	0.5197	fp0292	N/A	-6.53	0.267881	150 -- 159	60 -- 69	Thioredoxin family protein
			131	0.03282	0.5528	fp1327	rplE	-6.51	0.270214	1 -- 8	68 -- 75	50S ribosomal protein L5
			13	0.001405	0.2485	fp2010	recQ2	-6.51	0.270714	258 -- 269	49 -- 60	ATP-dependent DNA helicase RecQ2
			74	0.01401	0.4302	fp1920	N/A	-6.48	0.274591	282 -- 295	4 -- 19	Probable outer membrane protein precursor OmpA family
			150	0.03659	0.5528	fp1309	eno	-6.41	0.284266	195 -- 208	50 -- 64	Phosphopyruvate hydratase
			156	0.03808	0.5528	fp2027	N/A	-6.36	0.291809	45 -- 66	50 -- 71
			119	0.02579	0.4965	fp1919	pepT	-6.33	0.295364	108 -- 127	49 -- 71	Tripeptide aminopeptidase
			60	0.01049	0.4018	fp0670	dnaJ	-6.28	0.303435	241 -- 247	68 -- 74	Chaperone protein DnaJ
			45	0.007882	0.3701	fp1725	N/A	-6.12	0.327799	66 -- 89	44 -- 66	Acetyl-CoA C-acyltransferase
			87	0.01708	0.4404	fp1912	N/A	-5.91	0.360898	67 -- 87	53 -- 72
			133	0.03325	0.5528	fp0003	gidA	-5.9	0.362244	193 -- 237	2 -- 43	tRNA uridine 5-carboxymethylaminomethyl modification enzyme GidA
			115	0.02446	0.4868	fp1332	rplP	-5.9	0.362282	14 -- 37	33 -- 58	50S ribosomal protein L16
			129	0.03008	0.5361	fp1960	N/A	-5.81	0.377713	124 -- 141	55 -- 73
			5	0.0005672	0.2214	fp1931	ndh	-5.54	0.425499	195 -- 216	42 -- 63	NADH dehydrogenase
			179	0.04424	0.5597	fp1982	N/A	-5.43	0.444261	123 -- 132	63 -- 72
			186	0.04557	0.5597	fp1509	htpG	-5.42	0.446411	58 -- 69	63 -- 73	Chaperone protein HtpG
			173	0.04205	0.5589	fp0242	N/A	-5.11	0.506374	67 -- 74	59 -- 66	MazG family protein
			138	0.03491	0.5528	fp0662	N/A	-4.61	0.605136	117 -- 124	65 -- 72	NUDIX hydrolase family protein

## Sheet: Rfp36
Locustag=THC0290_N_0510			OUTPUT
Name=Rfp36
INPUT_sequence	Genome_blastn_eval		Rank	CopraRNA p-value	CopraRNA fdr value	Locus Tag	Locustag_v2	Gene Name	Energy [kcal/mol]	IntaRNA p-value	Position mRNA	Position sRNA	Annotation (retrieved from the complete genome sequence of strain JIP02/86, Duchaud E. et al Nature Biotechno 2007)	Additional homologs
>NC_009613	Flavobacterium psychrophilum JIP02/86 strain=JIP02/86 eval=2.87e-75		2	0.000135	0.1518	fp0334	THC0290_v2_0357	N/A	-25.42	0.00025	84 -- 122	114 -- 151	Conserved protein of unknown function, putative Bifunctional nuclease superfamily domain
AGATGCTATTGAAGAAATCTGTGTTGCTTTTTTGCGCTGTATTAGTAACGTACAGTCCTAAAATAATAGTGACTATCCTG			3	0.0002324	0.1742	fp0667		N/A	-24.27	0.000411	83 -- 121	140 -- 183	Probable sigma-54 dependent two-component system response regulatory protein
AAATTAGAAAGATCTTCTTGGTGCTAAAACTAGCCAAAGGGGTAATACAAAATCCTAACTAGCCCTGATGCTGGAATTGT			4	0.0005137	0.2316	fp0226		hppD	-22.61	0.000848	60 -- 88	139 -- 174	4-hydroxyphenylpyruvate dioxygenase
TGGAGCTCTTCGCATTTTTCTTGCGAAAGCGACTTCCAGCAG			5	0.0005148	0.2316	fp0237		N/A	-22.6	0.000853	117 -- 163	133 -- 183	Probable lyase
>NZ_CP007627	Flavobacterium psychrophilum strain=CSF259-93 eval=2.87e-75		6	0.0007769	0.2912	fp0315		N/A	-21.74	0.001244	109 -- 251	36 -- 182	Pseudouridylate synthase
AGATGCTATTGAAGAAATCTGTGTTGCTTTTTTGCGCTGTATTAGTAACGTACAGTCCTAAAATAATAGTGACTATCCTG			7	0.002921	0.8143	fp0856		N/A	-19.02	0.004203	5 -- 28	131 -- 157	Probable two-component system sensor histidine kinase
AAATTAGAAAGATCTTCTTGGTGCTAAAACTAGCCAAAGGGGTAATACAAAATCCTAACTAGCCCTGATGCTGGAATTGT			8	0.003212	0.8143	fp0921		lolD	-18.83	0.004586	91 -- 125	131 -- 163	Lipoprotein releasing system ATP-binding protein LolD
TGGAGCTCTTCGCATTTTTCTTGCGAAAGCGACTTCCAGCAG			9	0.003259	0.8143	fp1789		manA	-18.8	0.004648	121 -- 162	136 -- 183	Mannose-6-phosphate isomerase
>NZ_CP008902	Flavobacterium psychrophilum strain=950106-1/1 eval=2.87e-75		10	0.003739	0.8409	fp2514		fpo2	-18.52	0.005275	42 -- 105	9 -- 78	Probable transmembrane protein of unknown function Fpo2
AGATGCTATTGAAGAAATCTGTGTTGCTTTTTTGCGCTGTATTAGTAACGTACAGTCCTAAAATAATAGTGACTATCCTG			11	0.005638	0.9661	fp2469		N/A	-17.69	0.0077	250 -- 284	141 -- 173	Probable heptosyltransferase involved in lipopolysaccharide core biosynthesis
AAATTAGAAAGATCTTCTTGGTGCTAAAACTAGCCAAAGGGGTAATACAAAATCCTAACTAGCCCTGATGCTGGAATTGT			12	0.005661	0.9661	fp2286	THC0290_v2_2351	N/A	-17.68	0.007729	54 -- 104	144 -- 183	conserved exported protein of unknown function
TGGAGCTCTTCGCATTTTTCTTGCGAAAGCGACTTCCAGCAG			13	0.006817	0.9661	fp0026		atoD	-17.31	0.009172	84 -- 124	139 -- 182	3-oxoacid CoA-transferase subunit A family protein AtoD
			14	0.006923	0.9661	fp0147		prsA	-17.28	0.009303	3 -- 32	135 -- 164	Ribose-phosphate diphosphokinase
Sequence alignment was produced using Multalin tool using default parameters (http://multalin.toulouse.inra.fr/multalin/multalin.html).			15	0.007719	0.9661	fp1311		carA	-17.06	0.010285	85 -- 109	135 -- 156	Carbamoyl-phosphate synthase small subunit
			16	0.00835	0.9661	fp1222		N/A	-16.9	0.011057	17 -- 54	140 -- 183	23S rRNA pseudouridine synthase F
			17	0.008853	0.9661	fp2282		N/A	-16.78	0.01167	208 -- 243	142 -- 176	Probable acyltransferase
			19	0.009777	0.9661	fp1288		fnlA	-16.7	0.012139	217 -- 264	53 -- 100	FnlA protein involved in UDP-L-FucpNAc biosynthesis (a nucleotide sugar precursor for antigen-O biosynthesis)
			18	0.009483	0.9661	fp1448		N/A	-16.6	0.012689	191 -- 234	144 -- 183	Probable transcriptional regulator MerR family
			20	0.01063	0.9661	fp0343		N/A	-16.42	0.013752	250 -- 293	130 -- 184	Probable lipoprotein precursor
			21	0.01074	0.9661	fp1648		N/A	-16.39	0.013944	260 -- 295	17 -- 51
			22	0.01083	0.9661	fp1606		fumC	-16.38	0.014049	232 -- 252	157 -- 173	Fumarate hydratase class II
			23	0.01133	0.9661	fp2049		rpe	-16.29	0.014658	51 -- 197	20 -- 160	Ribulose-phosphate 3-epimerase
			24	0.01135	0.9661	fp1990		N/A	-16.28	0.01468	43 -- 71	14 -- 40	acyl-CoA thioesterase
			25	0.01188	0.9661	fp1802		yghO	-16.19	0.015308	122 -- 152	18 -- 45	Protein of unknown function YghO
			26	0.01236	0.9661	fp0105		N/A	-16.11	0.015878	223 -- 249	1 -- 26	Protein of unknown function precursor
			27	0.0136	0.9661	fp1055		N/A	-15.92	0.017339	10 -- 40	146 -- 178	Glycosyl transferase group 2 family protein
The use of three sRNA homologs with some degree of divergence is mandatory for CopraRNA tool.			28	0.01375	0.9661	fp0464		N/A	-15.9	0.017516	100 -- 153	116 -- 182	dCMP deaminase
If this criteria is true, the list of putative sRNA targets is ranked based on CopraRNA p-value. If not, the list is ranked based on IntaRNA p-value.			29	0.01431	0.9661	fp1223		N/A	-15.82	0.018176	42 -- 77	76 -- 105	Probable ion transporter
			30	0.01578	0.9661	fp1031		N/A	-15.62	0.019895	242 -- 270	151 -- 172	Translation initiation factor SUI1 family protein
			31	0.01584	0.9661	fp0605		cdsA	-15.62	0.01996	212 -- 238	138 -- 164	Phosphatidate cytidylyltransferase
			32	0.01631	0.9661	fp1215		dapF	-15.56	0.020515	122 -- 149	140 -- 173	Diaminopimelate epimerase
			33	0.01633	0.9661	fp1770		N/A	-15.55	0.020534	12 -- 25	139 -- 151	Protein of unknown function containing tetratricopeptide repeats
			34	0.0164	0.9661	fp1716		N/A	-15.55	0.020619	194 -- 227	149 -- 182	Putative M48 family metalloprotease precursor
			35	0.01671	0.9661	fp0373		actB	-15.51	0.020972	223 -- 247	157 -- 181	Alternative complex III protein B precursor
			36	0.01713	0.9661	fp2382		pdxA	-15.46	0.021466	112 -- 151	137 -- 175	4-hydroxythreonine-4-phosphate dehydrogenase PdxA
			37	0.01745	0.9661	fp0031		N/A	-15.42	0.021833	200 -- 251	1 -- 52	Probable transmembrane protein of unknown function
			38	0.01785	0.9661	fp1221		N/A	-15.38	0.022288	64 -- 83	18 -- 36
			39	0.01789	0.9661	fp2284		fabB	-15.37	0.022339	123 -- 154	76 -- 106	3-oxoacyl-(acyl-carrier-protein) synthase I
			40	0.01835	0.9661	fp2066		pcbD	-15.32	0.022865	247 -- 297	126 -- 173	Probable 2-hydroxy-6-oxo-6-phenylhexa-2 4-dienoic acid hydrolase
			41	0.01898	0.9661	fp1111		cphA	-15.26	0.023519	31 -- 59	140 -- 173	Cyanophycin synthetase
			42	0.01912	0.9661	fp2103		yyaL	-15.24	0.023755	189 -- 231	140 -- 186	Protein of unknown function YyaL
			43	0.02002	0.9661	fp1795		pyrB	-15.15	0.024786	153 -- 186	2 -- 38	Aspartate carbamoyltransferase
			44	0.02027	0.9661	fp1712		cmk	-15.12	0.025076	115 -- 180	122 -- 173	Cytidylate kinase
			45	0.02032	0.9661	fp2197		N/A	-15.12	0.025131	77 -- 101	57 -- 81
			46	0.02045	0.9661	fp0250		aspC3	-15.1	0.025284	186 -- 215	4 -- 34	Probable aspartate transaminase AspC3
			47	0.02148	0.9661	fp0314		N/A	-15.01	0.026458	51 -- 114	21 -- 91	Prenyltransferase family protein
			48	0.02219	0.9661	fp0348		gmk	-14.94	0.027262	277 -- 296	85 -- 102	Guanylate kinase
			49	0.02283	0.9661	fp1028		bfmBA	-14.88	0.027984	73 -- 84	139 -- 150	3-methyl-2-oxobutanoate dehydrogenase (2-methylpropanoyl-transferring)
			50	0.02296	0.9661	fp2452		N/A	-14.87	0.028138	230 -- 277	80 -- 123	Probable transmembrane protein of unknown function
			51	0.02309	0.9661	fp2327		N/A	-14.86	0.028277	169 -- 188	140 -- 156	3-oxoacyl-(acyl-carrier-protein) synthase
			52	0.02343	0.9661	fp0765		aroC	-14.83	0.02867	202 -- 264	94 -- 150	Chorismate synthase
			53	0.02374	0.9661	fp2274		hpaIIM	-14.81	0.029021	98 -- 149	45 -- 99	Type II modification methyltransferase HpaII
			54	0.02448	0.9661	fp2054		ftsA	-14.75	0.029848	203 -- 244	134 -- 179	Cell division protein FtsA
			55	0.0257	0.9661	fp1412		N/A	-14.65	0.031228	8 -- 51	76 -- 117	Probable sugar O-acetyltransferase
			56	0.0262	0.9661	fp1822		pyrD	-14.61	0.031789	70 -- 83	138 -- 150	Dihydroorotate oxidase
			57	0.02635	0.9661	fp2067		engB	-14.6	0.031956	5 -- 25	155 -- 174	Probable GTP-binding protein EngB
			58	0.02793	0.9661	fp0835		N/A	-14.48	0.033723	197 -- 217	160 -- 179
			154	0.07369	0.9661	fp0177		N/A	-14.47	0.033954	21 -- 71	136 -- 170	Probable cell surface protein (Leucine-rich repeat protein) precursor
			59	0.02832	0.9661	fp1649		N/A	-14.45	0.034159	68 -- 97	50 -- 81
			60	0.02869	0.9661	fp0058		N/A	-14.43	0.034573	16 -- 48	67 -- 98	Putative carboxypeptidase
			61	0.02914	0.9661	fp1147		mutL	-14.4	0.035076	256 -- 282	145 -- 173	DNA mismatch repair protein MutL
			62	0.03025	0.9661	fp0565		N/A	-14.32	0.036308	97 -- 126	45 -- 83
			63	0.03155	0.9661	fp0609		N/A	-14.24	0.037754	239 -- 252	142 -- 155
			64	0.03165	0.9661	fp2308		N/A	-14.23	0.037862	71 -- 86	163 -- 179	Protein of unknown function precursor
			65	0.03198	0.9661	fp1916		miaA	-14.21	0.038225	133 -- 176	140 -- 174	tRNA isopentenyltransferase
			66	0.03252	0.9661	fp2109		N/A	-14.18	0.03882	255 -- 295	127 -- 165	Probable transmembrane protein of unknown function
			67	0.0327	0.9661	fp1458		gpmA	-14.17	0.039018	99 -- 246	27 -- 176	Phosphoglycerate mutase
			68	0.0328	0.9661	fp2278		darC1	-14.16	0.039129	49 -- 87	146 -- 184	Probable acyl carrier protein involved in flexirubin-type pigment biosynthesis DarC1
			69	0.03365	0.9661	fp2338		N/A	-14.11	0.04007	260 -- 298	142 -- 179	Probable proton-dependent di-tripeptide transporter
			70	0.03459	0.9661	fp1503		N/A	-14.05	0.041107	203 -- 281	17 -- 104
			71	0.03496	0.9661	fp1350		N/A	-14.03	0.041512	98 -- 118	65 -- 85	Protein of unknown function precursor
			72	0.03556	0.9661	fp2363		leuS	-14	0.042172	102 -- 139	140 -- 183	Leucine--tRNA ligase
			73	0.0358	0.9661	fp1094		pyrC2	-13.98	0.04244	125 -- 250	2 -- 102	Dihydroorotase
			74	0.03637	0.9661	fp1788		N/A	-13.95	0.043065	35 -- 84	133 -- 173
			75	0.03765	0.9661	fp2264		N/A	-13.88	0.044462	225 -- 278	4 -- 53	3-oxoacyl-(acyl-carrier-protein) synthase
			76	0.03809	0.9661	fp0973		N/A	-13.86	0.04494	124 -- 152	155 -- 183
			77	0.03971	0.9661	fp0113		N/A	-13.78	0.046711	39 -- 88	111 -- 152	Probable lipoprotein precursor
			78	0.04018	0.9661	fp2010		recQ2	-13.75	0.047219	233 -- 271	66 -- 107	ATP-dependent DNA helicase RecQ2
			79	0.04114	0.9661	fp1244		N/A	-13.71	0.048268	64 -- 85	158 -- 176	Probable glycosyl transferase
			80	0.04122	0.9661	fp0333		thyA	-13.7	0.048357	228 -- 267	19 -- 52	Thymidylate synthase
			81	0.04172	0.9661	fp1328		rplX	-13.68	0.048899	20 -- 52	145 -- 179	50S ribosomal protein L24
			82	0.04234	0.9661	fp2298		N/A	-13.65	0.049568	56 -- 203	40 -- 186	Putative bacterial general secretion pathway protein
			83	0.0426	0.9661	fp1615		N/A	-13.64	0.04985	265 -- 292	54 -- 80	Protein of unknown function precursor
			84	0.04276	0.9661	fp0984		N/A	-13.63	0.050028	203 -- 247	127 -- 166	Probable transcriptional regulator AraC family
			85	0.04356	0.9661	fp1501		fabH2	-13.59	0.050898	65 -- 98	3 -- 40	3-oxoacyl-[acyl-carrier-protein] synthase III protein FabH2
			86	0.04359	0.9661	fp1650		N/A	-13.59	0.050922	248 -- 286	125 -- 167
			87	0.0437	0.9661	fp0931		N/A	-13.59	0.051044	14 -- 49	74 -- 105	Probable membrane fusion efflux lipoprotein precursor
			88	0.04423	0.9661	fp2309		N/A	-13.56	0.051618	163 -- 181	90 -- 107
			89	0.04455	0.9661	fp1480		N/A	-13.55	0.051968	249 -- 284	4 -- 35	Protein of unknown function containing ankyrin repeat signature
			90	0.0447	0.9661	fp0065		N/A	-13.54	0.052131	84 -- 102	159 -- 176
			91	0.04473	0.9661	fp1709		N/A	-13.54	0.052165	84 -- 109	139 -- 170
			94	0.04586	0.9661	fp0406		galE	-13.52	0.052596	132 -- 170	140 -- 183	UDP-glucose 4-epimerase
			92	0.04514	0.9661	fp1549		N/A	-13.52	0.052603	213 -- 232	159 -- 179
			93	0.04541	0.9661	fp0086		pepO	-13.51	0.05289	255 -- 299	76 -- 117	M13 family metallopeptidase PepO precursor
			95	0.04636	0.9661	fp1331		rpmC	-13.47	0.053914	118 -- 141	29 -- 51	50S ribosomal protein L29
			96	0.04679	0.9661	fp1601		menE	-13.45	0.054387	274 -- 295	111 -- 131	o-succinylbenzoate--CoA ligase
			97	0.04704	0.9661	fp0057		N/A	-13.44	0.054649	194 -- 214	2 -- 29
			98	0.04754	0.9661	fp0318		N/A	-13.42	0.055189	268 -- 290	21 -- 43	Hypothetical protein
			99	0.04758	0.9661	fp1099		N/A	-13.41	0.05523	49 -- 62	67 -- 80
			100	0.04785	0.9661	fp2399		N/A	-13.4	0.055524	248 -- 266	158 -- 172	Probable ferredoxin
			101	0.04803	0.9661	fp1096		N/A	-13.4	0.055722	262 -- 298	90 -- 127	Probable esterase
			102	0.04832	0.9661	fp1513		fjo20	-13.38	0.056029	216 -- 250	69 -- 104	Probable drug/metabolite-transporting permease Fjo20
			103	0.04834	0.9661	fp2412		porP	-13.38	0.056052	257 -- 277	146 -- 167	Protein of unknown function precursor PorP
			104	0.04904	0.9661	fp2355		N/A	-13.35	0.056802	84 -- 133	68 -- 103
			105	0.04904	0.9661	fp1996		murB	-13.35	0.056805	64 -- 95	78 -- 105	UDP-N-acetylmuramate dehydrogenase
			106	0.04906	0.9661	fp1614		pfkA	-13.35	0.056828	13 -- 31	152 -- 171	6-phosphofructokinase
			107	0.04944	0.9661	fp0436		frr	-13.34	0.057234	118 -- 146	4 -- 35	Ribosome recycling factor
			109	0.05071	0.9661	fp1373		N/A	-13.29	0.058599	217 -- 229	90 -- 102
			112	0.0533	0.9661	fp0159		N/A	-13.28	0.058819	86 -- 120	139 -- 184	Probable ATP-dependent DNA helicase UvrD/REP family
			110	0.05131	0.9661	fp2107		ctaE	-13.26	0.059233	104 -- 246	21 -- 163	Cytochrome c oxidase subunit III
			111	0.05329	0.9661	fp0401		N/A	-13.19	0.061358	209 -- 225	157 -- 172
			113	0.05341	0.9661	fp2451		N/A	-13.18	0.061482	39 -- 122	6 -- 103	Probable polysaccharide biosynthesis protein
			114	0.05381	0.9661	fp0063		N/A	-13.17	0.061909	273 -- 286	68 -- 81	Putative hemolysin
			115	0.05624	0.9661	fp1401		N/A	-13.08	0.064499	30 -- 48	146 -- 167	Hypothetical lipoprotein precursor
			116	0.0564	0.9661	fp0104		radA	-13.07	0.064665	125 -- 139	157 -- 173	DNA repair protein RadA
			117	0.05692	0.9661	fp0686		N/A	-13.05	0.065219	57 -- 93	126 -- 170
			118	0.05747	0.9661	fp0117		N/A	-13.04	0.065807	206 -- 228	107 -- 130	Hypothetical protein
			119	0.05771	0.9661	fp0663		pyrE	-13.03	0.066066	9 -- 39	142 -- 169	Orotate phosphoribosyltransferase
			120	0.05867	0.9661	fp1196		N/A	-12.99	0.067077	114 -- 145	2 -- 36	Cysteine synthase/cystathionine beta-synthase family protein
			122	0.05897	0.9661	fp1205		N/A	-12.98	0.067399	129 -- 218	1 -- 100	Putative muramidase precursor
			124	0.05956	0.9661	fp0545		glnA	-12.98	0.067558	233 -- 245	93 -- 105	Glutamate--ammonia ligase
			123	0.05938	0.9661	fp1275		N/A	-12.97	0.067832	74 -- 114	9 -- 45	Probable tyrosine-protein kinase involved in exopolysaccharide biosynthesis
			125	0.05972	0.9661	fp1424		N/A	-12.96	0.068195	133 -- 160	142 -- 172	Probable ABC-type transport system ATPase and permease components
			126	0.05984	0.9661	fp2408		sucA	-12.95	0.068324	227 -- 246	10 -- 28	2-oxoglutarate dehydrogenase subunit E1
			127	0.06003	0.9661	fp0982		N/A	-12.95	0.068529	45 -- 67	14 -- 40	Probable ATP-dependent exodeoxyribonuclease
			128	0.06047	0.9661	fp2097		skp	-12.93	0.068988	37 -- 70	133 -- 170	Outer membrane chaperone precursor Skp (OmpH)
			129	0.06121	0.9661	fp1247		N/A	-12.91	0.06977	162 -- 182	157 -- 174	Glycosyl transferase group 1 family protein
			130	0.06154	0.9661	fp1928		N/A	-12.9	0.070124	217 -- 258	128 -- 173	Acyl-CoA dehydrogenase family protein
			108	0.04976	0.9661	fp0624		N/A	-12.9	0.07015	95 -- 105	140 -- 150	Probable phosphatase/phosphohexomutase
			131	0.06203	0.9661	fp0731		N/A	-12.88	0.070642	63 -- 96	146 -- 181	Protein of unknown function precursor
			132	0.06213	0.9661	fp0078		N/A	-12.88	0.07075	35 -- 65	2 -- 28	Protein of unknown function precursor
			133	0.06295	0.9661	fp1612		N/A	-12.85	0.071614	126 -- 136	139 -- 149
			134	0.06373	0.9661	fp0274		N/A	-12.83	0.072439	193 -- 226	2 -- 26	Protein of unknown function precursor
			135	0.06396	0.9661	fp2402		N/A	-12.82	0.072683	76 -- 89	157 -- 173	Probable membrane fusion efflux lipoprotein precursor
			136	0.06402	0.9661	fp0422		N/A	-12.82	0.072746	208 -- 226	85 -- 103	Probable ABC-type transport system ATPase and permease components
			137	0.06403	0.9661	fp1621		N/A	-12.82	0.072753	9 -- 36	2 -- 27	Protein of unknown function putative methyltransferase
			138	0.06448	0.9661	fp0963		N/A	-12.8	0.073223	31 -- 53	157 -- 172	Probable transmembrane protein of unknown function
			139	0.06492	0.9661	fp1666		hupA	-12.79	0.073692	219 -- 263	126 -- 166	Histone-like bacterial DNA-binding protein HU-alpha
			140	0.06553	0.9661	fp1891		ppiA	-12.77	0.074339	23 -- 48	11 -- 36	Probable peptidyl-prolyl cis-trans isomerase precursor PpiA
			141	0.06561	0.9661	fp0244		N/A	-12.77	0.074414	47 -- 65	92 -- 108	Hypothetical protein
			142	0.06606	0.9661	fp0138		pphA	-12.75	0.074894	244 -- 284	4 -- 40	Phosphoprotein phosphatase
			143	0.0663	0.9661	fp0961		N/A	-12.75	0.075146	272 -- 294	67 -- 88	Probable transmembrane protein of unknown function
			144	0.06645	0.9661	fp1201		lipB	-12.74	0.075298	23 -- 42	140 -- 156	Lipoyl(octanoyl) transferase
			145	0.06666	0.9661	fp0567		N/A	-12.74	0.075523	59 -- 74	131 -- 146
			146	0.06682	0.9661	fp1342		rpsG	-12.73	0.075693	15 -- 50	132 -- 169	30S ribosomal protein S7
			147	0.06692	0.9661	fp1043		N/A	-12.73	0.075798	1 -- 14	153 -- 166	Probable transmembrane protein of unknown function
			148	0.06698	0.9661	fp0658		menF	-12.73	0.075864	40 -- 86	20 -- 105	Isochorismate synthase
			149	0.06719	0.9661	fp1156		ccoN/ccoO	-12.72	0.07608	14 -- 47	12 -- 48	Cytochrome c oxidase cbb3-type subunit I and II
			150	0.06931	0.9661	fp2409		sucB	-12.66	0.078306	135 -- 148	140 -- 155	Dihydrolipoyllysine-residue succinyltransferase component of 2-oxoglutarate dehydrogenase complex
			151	0.0697	0.9661	fp1691		kdpB	-12.65	0.07872	51 -- 70	133 -- 156	Potassium-transporting ATPase B subunit
			152	0.07188	0.9661	fp0381		N/A	-12.58	0.081	114 -- 135	4 -- 26	Probable transmembrane protein of unknown function
			153	0.07302	0.9661	fp2273		hpaIIR	-12.55	0.082193	143 -- 160	149 -- 166	Type II restriction endonuclease HpaII
			156	0.0754	0.9661	fp1278		N/A	-12.52	0.083385	138 -- 178	133 -- 170	Probable aminotransferase
			155	0.07427	0.9661	fp0952		N/A	-12.52	0.0835	63 -- 81	147 -- 165
			158	0.07568	0.9661	fp2177		N/A	-12.48	0.084904	229 -- 250	18 -- 40
			157	0.07565	0.9661	fp2325		pcd	-12.48	0.084939	40 -- 63	146 -- 169	Piperideine-6-carboxylate dehydrogenase
			121	0.05897	0.9661	fp1925		N/A	-12.48	0.08502	63 -- 89	90 -- 113	Glu/Leu/Phe/Val dehydrogenase family protein
			159	0.07577	0.9661	fp1876		N/A	-12.48	0.085071	87 -- 118	81 -- 107
			160	0.07579	0.9661	fp1035		N/A	-12.48	0.085087	206 -- 240	132 -- 161
			161	0.07613	0.9661	fp2021		hisS	-12.46	0.085764	122 -- 132	140 -- 150	Histidine--tRNA ligase
			162	0.07646	0.9661	fp2550		N/A	-12.46	0.085787	257 -- 285	146 -- 172	Probable transposase
			163	0.07671	0.9661	fp1145		N/A	-12.45	0.086051	131 -- 176	122 -- 167
			164	0.07799	0.9661	fp1538		N/A	-12.42	0.087381	212 -- 241	3 -- 30
			166	0.07859	0.9661	fp2336		N/A	-12.4	0.088011	257 -- 295	2 -- 38	Thioredoxin family protein
			167	0.07918	0.9661	fp0735		N/A	-12.39	0.088617	143 -- 163	58 -- 79	Putative DNA binding protein
			168	0.07934	0.9661	fp1295		ugd	-12.38	0.088783	64 -- 86	78 -- 104	UDP-glucose 6-dehydrogenase
			169	0.07948	0.9661	fp0019		mltD	-12.38	0.088938	44 -- 82	150 -- 179	Membrane-bound lytic murein transglycosylase D precursor
			170	0.07981	0.9661	fp0440		N/A	-12.37	0.08928	12 -- 46	127 -- 158	Probable outer membrane protein precursor
			171	0.08038	0.9661	fp0430		thiD	-12.36	0.08987	258 -- 300	144 -- 173	Phosphomethylpyrimidine kinase
			172	0.08091	0.9661	fp1841		recN	-12.34	0.090418	145 -- 168	149 -- 171	DNA repair protein recN
			173	0.0815	0.9661	fp1564		N/A	-12.33	0.091032	140 -- 171	139 -- 167
			165	0.07859	0.9661	fp2098		N/A	-12.32	0.091278	267 -- 286	20 -- 37	Outer membrane protein precursor OmpH family P18
			174	0.08221	0.9661	fp1631		N/A	-12.31	0.091772	226 -- 275	126 -- 171	Putative mannosyltransferase. Glycosyl transferase group 4 family protein
			175	0.08227	0.9661	fp1335		rpsS	-12.31	0.091831	86 -- 98	69 -- 82	30S ribosomal protein S19
			176	0.08235	0.9661	fp0469		nusA	-12.31	0.09191	106 -- 244	76 -- 182	Transcription elongation protein NusA
			177	0.08238	0.9661	fp2240		N/A	-12.31	0.091948	69 -- 95	77 -- 105	Hypothetical protein
			178	0.0834	0.9661	fp0981		kdsB	-12.28	0.093005	197 -- 227	149 -- 179	3-deoxy-manno-octulosonate cytidylyltransferase
			179	0.08358	0.9661	fp1397		rpsT	-12.28	0.093196	10 -- 48	126 -- 171	30S ribosomal protein S20
			180	0.08419	0.9661	fp1525		N/A	-12.26	0.093819	243 -- 271	80 -- 105	Probable CRISPR-associated (Cas) protein. Cas 1 family
			181	0.08448	0.9661	fp1455		N/A	-12.26	0.094124	280 -- 298	167 -- 184	RNA polymerase ECF-type sigma factor
			182	0.08452	0.9661	fp1120		N/A	-12.25	0.094167	162 -- 187	140 -- 161	Probable transmembrane protein of unknown function. Putative septum formation initiator
			183	0.08535	0.9661	fp1613		gapA3	-12.23	0.095022	5 -- 121	2 -- 102	Glyceraldehyde-3-phosphate dehydrogenase (phosphorylating)
			184	0.08616	0.9661	fp2056		murC	-12.21	0.095867	39 -- 56	90 -- 105	UDP-N-acetylmuramate--L-alanine ligase
			185	0.08624	0.9661	fp0733		N/A	-12.21	0.095946	169 -- 198	75 -- 108
			186	0.08645	0.9661	fp1511		N/A	-12.21	0.096161	79 -- 89	93 -- 103
			187	0.08689	0.9661	fp0397		N/A	-12.2	0.096614	85 -- 100	158 -- 177	Probable tRNA/rRNA methyltransferase
			188	0.08793	0.9661	fp2099		murI	-12.17	0.097691	204 -- 239	76 -- 105	Glutamate racemase
			189	0.08827	0.9661	fp2178		N/A	-12.17	0.098048	92 -- 123	135 -- 169	Probable phage protein
			190	0.08885	0.9661	fp2331		N/A	-12.15	0.09864	154 -- 186	130 -- 164	Probable transmembrane protein of unknown function
			191	0.08897	0.9661	fp1214		N/A	-12.15	0.098766	43 -- 70	2 -- 31	Probable ribosomal-protein-amino-adic N-acetyltransferase
			193	0.08935	0.9661	fp1734		N/A	-12.14	0.099158	30 -- 52	146 -- 169	Probable transcriptional regulator AsnC family
			194	0.08945	0.9661	fp1430		ftsY	-12.14	0.09919	107 -- 117	140 -- 150	Cell division protein FtsY
			195	0.08973	0.9661	fp0213		N/A	-12.13	0.099552	203 -- 258	76 -- 135
			196	0.09004	0.9661	fp0365		phoU	-12.13	0.099875	30 -- 72	76 -- 105	Phosphate transport system protein PhoU
			197	0.0903	0.9661	fp0909		N/A	-12.12	0.100139	55 -- 90	21 -- 59	Probable lipoprotein precursor
			198	0.09069	0.9661	fp1307		N/A	-12.11	0.100546	106 -- 129	10 -- 36	Amidinotransferase family protein
			199	0.09133	0.9661	fp1057		N/A	-12.1	0.101203	261 -- 287	17 -- 43	Hypothetical protein
			200	0.09192	0.9661	fp1283		wcgN	-12.08	0.101813	219 -- 254	4 -- 29	Putative undecaprenyl-phosphate glycosyl-1-phosphate transferase
			192	0.08905	0.9661	fp0097		fmo	-11.76	0.11778	215 -- 247	2 -- 34	Flavomodulin

## Sheet: Rfp53
Locustag=THC0290_N_0797			OUTPUT
Name=Rfp53
INPUT_sequence	Genome_blastn_eval		Rank	CopraRNA p-value	CopraRNA fdr value	Locus Tag	Gene Name	Energy [kcal/mol]	IntaRNA p-value	Position mRNA	Position sRNA	Annotation (retrieved from the complete genome sequence of strain JIP02/86, Duchaud E. et al Nature Biotechno 2007)	Additional homologs
>NC_009613	Flavobacterium psychrophilum JIP02/86 strain=JIP02/86 eval=1.62e-22		15	0.006363	0.5121	fp1381	manC	-10.9	0.004118	68 -- 107	2 -- 42	Mannose-1-phosphate guanylyltransferase (GDP)
CAATTTTGAAGCAATTCACAATAAGGATTATTCCGTTGTGAAAACATTTAAAGCGGCCTCTAAAGGGTCGC			23	0.009564	0.5121	fp0413	N/A	-9.88	0.006458	76 -- 87	2 -- 13	Fatty acid desaturase
>NC_016510	Flavobacterium columnare ATCC 49512 strain=ATCC 49512 eval=9.07e-12		18	0.007277	0.5121	fp2127	N/A	-9.34	0.008282	181 -- 192	1 -- 12	Probable M1 family aminopeptidase precursor
AATTTGAAAGCAATTCACAATAAGGATTATTCCGTTGTGAAAACATTTAGGTTGCCTCT			4	0.002248	0.5121	fp0369	N/A	-8.76	0.010886	136 -- 146	2 -- 12	Probable transmembrane protein of unknown function. Putative amino-acid efflux protein
>NZ_CP007627	Flavobacterium psychrophilum strain=CSF259-93 eval=1.62e-22		40	0.01608	0.5121	fp1549	N/A	-8.65	0.011463	250 -- 260	3 -- 13		fp2321
CAATTTTGAAGCAATTCACAATAAGGATTATTCCGTTGTGAAAACATTTAAAGCGGCCTCTAAAGGGTCGC			44	0.01699	0.5121	fp1975	topA	-8.53	0.012181	11 -- 21	2 -- 12	DNA topoisomerase I
>NZ_CP008902	Flavobacterium psychrophilum strain=950106-1/1 eval=1.62e-22		56	0.02041	0.5121	fp1816	N/A	-8.12	0.014914	1 -- 10	5 -- 14
CAATTTTGAAGCAATTCACAATAAGGATTATTCCGTTGTGAAAACATTTAAAGCGGCCTCTAAAGGGTCGC			17	0.007078	0.5121	fp1752	mqo	-8.07	0.015234	58 -- 67	4 -- 13	Malate dehydrogenase (acceptor)
>NZ_CP015107	Flavobacterium columnare strain=C#2 eval=9.07e-12		61	0.02147	0.5121	fp1550	N/A	-8.01	0.01577	15 -- 25	3 -- 13	Hypothetical protein
AATTTGAAAGCAATTCACAATAAGGATTATTCCGTTGTGAAAACATTTAGGTTGCCTCT			133	0.037	0.5121	fp0807	N/A	-7.88	0.016767	69 -- 80	1 -- 12
>NZ_CP017688	Flavobacterium crassostreae strain=LPB0076 eval=6.14e-20		58	0.02086	0.5121	fp2375	pckA	-7.84	0.017182	261 -- 269	4 -- 12	Phosphoenolpyruvate carboxykinase (ATP)
CAATTTTGAAGCAATTCACAATAAGGATTATTCCGTTGTGAAAACATTCAAAGCGGCCTCACAAGGGTCGC			51	0.01917	0.5121	fp1930	N/A	-7.76	0.017898	110 -- 122	2 -- 14	Probable transmembrane protein of unknown function
			42	0.01683	0.5121	fp0002	N/A	-7.73	0.018144	103 -- 111	4 -- 12
Sequence alignment was produced using Multalin tool using default parameters (http://multalin.toulouse.inra.fr/multalin/multalin.html).			79	0.02584	0.5121	fp1883	dcp2	-7.6	0.019351	73 -- 81	5 -- 13	Peptidyl-dipeptidase precursor Dcp2
			85	0.02646	0.5121	fp0870	ptrB	-7.57	0.019728	113 -- 123	2 -- 12	Protease II (Oligopeptidase B)
			84	0.02642	0.5121	fp0856	N/A	-7.56	0.019834	4 -- 14	3 -- 13	Probable two-component system sensor histidine kinase
			9	0.00422	0.5121	fp1915	N/A	-7.5	0.020424	59 -- 70	1 -- 12	Probable DNA polymerase III subunit
			6	0.003426	0.5121	fp1794	N/A	-7.48	0.020638	174 -- 182	4 -- 12
			94	0.02825	0.5121	fp1786	N/A	-7.41	0.021352	8 -- 20	2 -- 14
			76	0.02525	0.5121	fp1201	lipB	-7.34	0.022202	272 -- 284	3 -- 15	Lipoyl(octanoyl) transferase
			97	0.0295	0.5121	fp0014	sprC	-7.32	0.022398	50 -- 58	5 -- 13	Putative adhesin precursor SprC
			100	0.03036	0.5121	fp1593	dgkA	-7.17	0.024293	35 -- 43	4 -- 12	Diacylglycerol kinase
			14	0.006221	0.5121	fp1063	tdk	-7.14	0.024661	78 -- 88	3 -- 13	Thymidine kinase
			67	0.02298	0.5121	fp2299	gspD	-7.12	0.024885	180 -- 191	1 -- 12	Putative bacterial general secretion pathway protein D precursor
The use of three sRNA homologs with some degree of divergence is mandatory for CopraRNA tool.			111	0.03401	0.5121	fp1464	N/A	-7.02	0.02621	22 -- 32	3 -- 13	Probable ABC-type iron(III)-transport system permease component
If this criteria is true, the list of putative sRNA targets is ranked based on CopraRNA p-value. If not, the list is ranked based on IntaRNA p-value.			25	0.009766	0.5121	fp2197	N/A	-7.01	0.026401	42 -- 53	2 -- 13
			114	0.03446	0.5121	fp1533	N/A	-7	0.026591	202 -- 215	1 -- 13
			115	0.03446	0.5121	fp1533	N/A	-7	0.026591	202 -- 215	1 -- 13
			117	0.03455	0.5121	fp0850	N/A	-6.99	0.026668	202 -- 216	1 -- 13	Probable transcriptional regulator AraC family
			125	0.03606	0.5121	fp1360	hpt	-6.9	0.027957	127 -- 136	4 -- 13	Hypoxanthine phosphoribosyltransferase
			126	0.03611	0.5121	fp0942	acsA	-6.9	0.028001	288 -- 299	4 -- 15	Acetate--CoA ligase
			130	0.03669	0.5121	fp2505	N/A	-6.87	0.028491	19 -- 28	3 -- 12	Hypothetical protein
			135	0.03731	0.5121	fp2315	N/A	-6.81	0.029439	116 -- 155	2 -- 42
			93	0.02811	0.5121	fp1934	N/A	-6.79	0.029639	48 -- 55	5 -- 12	Probable acyltransferase
			27	0.01014	0.5121	fp2478	rmlD	-6.75	0.030421	255 -- 265	5 -- 15	dTDP-4-dehydrorhamnose reductase
			142	0.03979	0.5121	fp1819	N/A	-6.7	0.031166	214 -- 223	5 -- 14	Nucleoside-triphosphatase
			143	0.04034	0.5121	fp0532	N/A	-6.67	0.031639	46 -- 56	2 -- 12	Probable ABC-type multidrug transport system ATPase and permease components
			146	0.04132	0.5121	fp1635	N/A	-6.63	0.032487	125 -- 136	2 -- 13	Probable transmembrane protein of unknown function
			151	0.04195	0.5121	fp0698	N/A	-6.59	0.033033	283 -- 293	2 -- 12	Probable transmembrane protein of unknown function
			32	0.01248	0.5121	fp1745	N/A	-6.57	0.03345	42 -- 52	2 -- 12	Putative dinucleotide-utilizing enzyme involved in molybdopterin and thiamine biosynthesis
			154	0.04273	0.5121	fp1624	N/A	-6.56	0.033708	276 -- 284	4 -- 12	Probable lipoprotein precursor
			98	0.03003	0.5121	fp0155	N/A	-6.52	0.034357	67 -- 74	5 -- 12
			158	0.04349	0.5121	fp2493	folB	-6.52	0.034373	130 -- 141	2 -- 13	Dihydroneopterin aldolase
			159	0.04359	0.5121	fp0720	N/A	-6.52	0.034462	281 -- 293	1 -- 12
			161	0.04411	0.5121	fp0457	nrdA	-6.49	0.034915	132 -- 140	4 -- 12	Ribonucleoside-diphosphate reductase alpha subunit
			78	0.02557	0.5121	fp2457	atpG	-6.47	0.035364	11 -- 19	5 -- 13	ATP synthase gamma subunit
			162	0.04502	0.5121	fp1193	N/A	-6.45	0.035709	2 -- 10	6 -- 14	Hypothetical protein
			105	0.0326	0.5121	fp0110	N/A	-6.42	0.036267	112 -- 120	4 -- 12	Probable lipoprotein precursor
			38	0.01491	0.5121	fp1125	N/A	-6.4	0.036802	51 -- 64	1 -- 14
			96	0.02928	0.5121	fp0010	N/A	-6.4	0.036804	211 -- 218	7 -- 14	Probable transmembrane protein of unknown function
			164	0.04663	0.5121	fp1984	groS	-6.38	0.03712	270 -- 278	4 -- 12	10 kDa chaperonin GroES
			169	0.04731	0.5121	fp0710	N/A	-6.35	0.037716	101 -- 109	5 -- 13	Two-component system sensor histidine kinase
			22	0.008475	0.5121	fp0396	N/A	-6.34	0.03803	9 -- 17	7 -- 15	Protein of unknown function precursor
			170	0.04748	0.5121	fp0417	N/A	-6.33	0.03813	70 -- 83	2 -- 15	Protein of unknown function precursor
			177	0.04848	0.5121	fp2479	rmlC	-6.31	0.038746	16 -- 24	4 -- 12	dTDP-4-dehydrorhamnose 3 5-epimerase
			26	0.01003	0.5121	fp2308	N/A	-6.28	0.039205	62 -- 73	4 -- 15	Protein of unknown function precursor
			50	0.01858	0.5121	fp2308	N/A	-6.28	0.039205	62 -- 73	4 -- 15	Protein of unknown function precursor
			179	0.049	0.5121	fp2308	N/A	-6.28	0.039205	62 -- 73	4 -- 15	Protein of unknown function precursor
			183	0.05025	0.5121	fp0574	glcD	-6.23	0.040314	181 -- 192	3 -- 14	(S)-2-hydroxy-acid oxidase
			24	0.00966	0.5121	fp1504	N/A	-6.23	0.04034	202 -- 210	5 -- 13	Probable ABC-type transport system ATPase component
			73	0.02473	0.5121	fp2215	kynU	-6.23	0.040372	132 -- 139	6 -- 13	Kynureninase
			31	0.01214	0.5121	fp0276	N/A	-6.21	0.040832	291 -- 299	4 -- 12	Probable cold shock protein
			16	0.006454	0.5121	fp0199	purN	-6.2	0.041152	220 -- 231	3 -- 14	Phosphoribosylglycinamide formyltransferase
			69	0.02318	0.5121	fp0300	yggG	-6.19	0.041326	104 -- 114	2 -- 12	Putative secreted M48 family metalloprotease YggG precursor
			188	0.05181	0.5121	fp0769	N/A	-6.17	0.041697	118 -- 125	5 -- 12	Probable cell wall-associated hydrolase
			192	0.05211	0.5121	fp1613	gapA3	-6.16	0.041964	35 -- 47	3 -- 15	Glyceraldehyde-3-phosphate dehydrogenase (phosphorylating)
			21	0.008137	0.5121	fp1850	rpsR	-5.97	0.046766	222 -- 230	4 -- 12	30S ribosomal protein S18
			35	0.01331	0.5121	fp0308	N/A	-5.95	0.047228	275 -- 283	25 -- 33
			116	0.03452	0.5121	fp2441	N/A	-5.88	0.049076	121 -- 129	4 -- 12	Probable lipoprotein precursor
			91	0.02796	0.5121	fp1421	N/A	-5.82	0.050861	38 -- 47	3 -- 12	Prenyltransferase family protein
			11	0.004685	0.5121	fp2427	N/A	-5.81	0.051173	2 -- 9	8 -- 15	Putative amidophosphoribosyltransferase
			65	0.02277	0.5121	fp0838	hutH1	-5.8	0.05151	47 -- 57	5 -- 15	Histidine ammonia-lyase
			95	0.02858	0.5121	fp1299	wza	-5.71	0.054247	177 -- 191	1 -- 14	Probable polysaccharide exporter lipoprotein precursor Wza
			175	0.04837	0.5121	fp0908	sucC	-5.71	0.054274	93 -- 103	3 -- 14	Succinyl-CoA synthetase beta subunit
			145	0.04109	0.5121	fp1731	N/A	-5.64	0.056567	170 -- 180	5 -- 15	Esterase/lipase/thioesterase family protein precursor
			66	0.02297	0.5121	fp2012	N/A	-5.63	0.056716	138 -- 146	4 -- 12	Hypothetical protein
			59	0.02088	0.5121	fp2266	N/A	-5.58	0.058332	32 -- 41	4 -- 13
			178	0.04853	0.5121	fp0950	N/A	-5.55	0.059527	181 -- 189	4 -- 12	acyl-CoA thioesterase
			195	0.05299	0.5121	fp0406	galE	-5.53	0.060103	271 -- 280	3 -- 12	UDP-glucose 4-epimerase
			163	0.04505	0.5121	fp1896	N/A	-5.52	0.060594	224 -- 236	2 -- 14	LysM domain protein precursor
			83	0.02635	0.5121	fp2036	N/A	-5.49	0.06148	113 -- 122	4 -- 13	Probable transmembrane protein of unknown function
			81	0.02616	0.5121	fp0078	N/A	-5.44	0.063243	81 -- 87	6 -- 12	Protein of unknown function precursor
			103	0.03187	0.5121	fp1489	fecA	-5.43	0.0638	244 -- 250	6 -- 12	ABC-type iron(III) dicitrate-transport system component TonB-dependent outer membrane receptor FecA precursor
			12	0.004856	0.5121	fp0437	N/A	-5.4	0.064989	17 -- 24	54 -- 61	Probable secreted exopolyphosphatase precursor	fp1435
			77	0.02529	0.5121	fp0136	N/A	-5.37	0.065961	184 -- 192	4 -- 12	ATPase MoxR family
			89	0.02735	0.5121	fp1940	N/A	-5.37	0.0661	17 -- 26	4 -- 13	Methylmalonyl-CoA mutase
			150	0.04172	0.5121	fp0291	N/A	-5.35	0.066673	158 -- 166	6 -- 14	Probable transmembrane protein of unknown function
			36	0.01424	0.5121	fp1623	ddpX	-5.31	0.068631	188 -- 196	3 -- 11	D-alanyl-D-alanine dipeptidase
			167	0.04691	0.5121	fp0962	N/A	-5.3	0.069017	209 -- 218	2 -- 11	Probable phosphoglycerol transferase
			45	0.01729	0.5121	fp0469	nusA	-5.28	0.069529	147 -- 164	55 -- 71	Transcription elongation protein NusA
			156	0.04302	0.5121	fp0745	N/A	-5.28	0.069662	260 -- 269	4 -- 13	Probable transmembrane protein of unknown function
			109	0.03384	0.5121	fp2395	N/A	-5.25	0.070762	150 -- 158	4 -- 12	Putative metal-dependent hydrolase
			153	0.04239	0.5121	fp0623	N/A	-5.23	0.071631	134 -- 142	4 -- 12	RNA polymerase ECF-type sigma factor
			190	0.05197	0.5121	fp2052	N/A	-5.22	0.072179	70 -- 79	4 -- 13
			47	0.01794	0.5121	fp1668	mrp	-5.2	0.073003	234 -- 242	4 -- 12	ATP-binding protein Mrp/Nbp35 family
			152	0.04237	0.5121	fp0452	N/A	-5.17	0.074448	10 -- 18	4 -- 12	Putative sensor (PAS) domain for methyl-accepting chemotaxis sensory transducer
			160	0.04402	0.5121	fp2392	sufC	-5.15	0.075044	225 -- 231	6 -- 12	ABC transporter ATP-binding protein
			185	0.05079	0.5121	fp0400	N/A	-5.13	0.076109	249 -- 257	7 -- 15	Outer membrane protein precursor AsmA family
			82	0.02632	0.5121	fp0725	N/A	-5.13	0.076188	228 -- 237	3 -- 12	Putative sugar phosphate isomerase
			10	0.004389	0.5121	fp1005	N/A	-5.12	0.076661	181 -- 190	2 -- 11	Probable transcriptional regulator AraC family
			3	0.001752	0.5121	fp1302	N/A	-5.1	0.077325	230 -- 237	6 -- 13
			131	0.03678	0.5121	fp2347	mtgA	-5.02	0.081333	39 -- 49	1 -- 11	Monofunctional biosynthetic peptidoglycan transglycosylase
			193	0.05259	0.5121	fp1738	oxyR	-4.94	0.085333	273 -- 279	7 -- 13	Redox-sensitive transcriptional activator OxyR
			54	0.02026	0.5121	fp1912	N/A	-4.9	0.087391	29 -- 37	4 -- 12
			19	0.007496	0.5121	fp0024	gldH	-4.89	0.08761	77 -- 85	24 -- 32	Gliding motility lipoprotein precursor GldH
			87	0.02659	0.5121	fp0154	N/A	-4.88	0.088107	274 -- 285	2 -- 13	Probable hydrolase
			64	0.02242	0.5121	fp2029	cynT	-4.86	0.089226	102 -- 110	4 -- 12	Carbonic anhydrase
			92	0.02798	0.5121	fp1067	N/A	-4.85	0.09019	234 -- 245	4 -- 15
			88	0.02728	0.5121	fp1129	N/A	-4.84	0.090568	282 -- 292	5 -- 15
			121	0.03537	0.5121	fp1253	N/A	-4.83	0.090898	56 -- 69	2 -- 15	Hexapeptide transferase family protein	fp1248
			39	0.0158	0.5121	fp2335	N/A	-4.83	0.091134	262 -- 269	5 -- 12	Thioredoxin family protein precursor
			173	0.04829	0.5121	fp1022	N/A	-4.81	0.092128	260 -- 269	3 -- 13	Protein of unknown function precursor
			29	0.01109	0.5121	fp0037	hemF	-4.8	0.092826	42 -- 51	5 -- 14	Coproporphyrinogen oxidase
			137	0.03805	0.5121	fp1179	rplA	-4.79	0.0931	276 -- 286	2 -- 12	50S ribosomal protein L1
			106	0.03286	0.5121	fp2254	N/A	-4.64	0.102058	131 -- 144	1 -- 14
			2	0.0009703	0.5121	fp2439	N/A	-4.59	0.10523	217 -- 225	3 -- 11	acyl-CoA thioesterase
			55	0.02029	0.5121	fp0232	fpp2	-4.48	0.112309	281 -- 287	7 -- 13	Psychrophilic metalloprotease Fpp2 precursor	fp0231
			134	0.0372	0.5121	fp0135	N/A	-4.48	0.112607	25 -- 41	1 -- 15
			138	0.03822	0.5121	fp0421	N/A	-4.46	0.114197	110 -- 117	4 -- 11	Probable ABC-type transport system membrane fusion efflux protein component
			108	0.03346	0.5121	fp1143	N/A	-4.4	0.118207	226 -- 240	1 -- 14	Probable secreted M23/M37 family peptidase precursor
			113	0.03432	0.5121	fp1143	N/A	-4.4	0.118207	226 -- 240	1 -- 14	Probable secreted M23/M37 family peptidase precursor
			57	0.02042	0.5121	fp1246	N/A	-4.4	0.118375	111 -- 119	4 -- 12	Glycosyl transferase group 1 family protein
			102	0.03129	0.5121	fp0715	N/A	-4.4	0.118536	14 -- 22	6 -- 14	Two-component system response regulatory protein LuxR family
			63	0.02209	0.5121	fp0026	atoD	-4.31	0.125042	277 -- 284	5 -- 12	3-oxoacid CoA-transferase subunit A family protein AtoD
			129	0.03661	0.5121	fp0001	N/A	-4.25	0.129564	127 -- 133	6 -- 12	Putative chromosome segregation ATPase
			199	0.05414	0.5121	fp0164	pyrC1	-4.25	0.129903	144 -- 152	5 -- 13	Dihydroorotase
			74	0.02498	0.5121	fp0578	N/A	-4.23	0.131001	253 -- 260	7 -- 14	Probable lipoprotein precursor
			68	0.02301	0.5121	fp1782	ftnA	-4.21	0.133093	36 -- 42	7 -- 13	Ferritin
			90	0.02745	0.5121	fp1079	purC	-4.17	0.136122	130 -- 137	4 -- 11	Phosphoribosylaminoimidazolesuccinocarboxamide synthase
			197	0.05342	0.5121	fp1570	N/A	-4.16	0.136714	287 -- 295	3 -- 11		fp1537
			191	0.05198	0.5121	fp0090	feoB	-4.16	0.13707	222 -- 231	6 -- 15	Ferrous iron transport protein B
			80	0.02593	0.5121	fp1773	N/A	-4.08	0.144244	256 -- 264	4 -- 12	Probable chloride channel protein
			182	0.04991	0.5121	fp0336	etfB	-4.06	0.145425	241 -- 248	4 -- 11	Electron transfer flavoprotein beta subunit
			149	0.0416	0.5121	fp0018	pgk	-4.04	0.147362	8 -- 14	6 -- 12	Phosphoglycerate kinase
			5	0.002745	0.5121	fp1664	ssb	-4.04	0.147995	126 -- 137	2 -- 13	Single-strand DNA-binding protein Ssb
			128	0.03631	0.5121	fp1014	phrB1	-4.03	0.148382	134 -- 140	6 -- 12	Deoxyribodipyrimidine photolyase PhrB1
			107	0.03288	0.5121	fp2475	N/A	-4.01	0.15066	49 -- 58	56 -- 65	Glycosyl transferase group 2 family protein
			144	0.04066	0.5121	fp0849	uvrA2	-3.99	0.152323	169 -- 177	1 -- 9	Excinuclease ABC A subunit UvrA2
			122	0.03547	0.5121	fp2376	rnpA	-3.96	0.155434	133 -- 142	5 -- 14	Ribonuclease P protein component
			176	0.04847	0.5121	fp0633	mrsA	-3.95	0.156004	97 -- 128	6 -- 45	Peptide methionine sulfoxide reductase MsrA
			101	0.03112	0.5121	fp0974	N/A	-3.9	0.161105	161 -- 168	6 -- 13	Probable UDP-N-acetylglucosamine acyltransferase
			139	0.03884	0.5121	fp0517	N/A	-3.85	0.166354	254 -- 262	24 -- 32	Rhodanese-related sulfurtransferase
			136	0.03764	0.5121	fp1869	N/A	-3.84	0.166952	245 -- 254	3 -- 12
			52	0.02001	0.5121	fp1077	N/A	-3.84	0.167076	3 -- 10	25 -- 32	Protein of unknown function precursor
			110	0.03386	0.5121	fp1999	N/A	-3.82	0.16922	92 -- 104	1 -- 12
			180	0.04937	0.5121	fp1761	pafA	-3.8	0.17144	81 -- 89	4 -- 12	Alkaline phosphatase precursor
			140	0.03911	0.5121	fp0191	ltd	-3.77	0.175023	186 -- 193	4 -- 11	L-threonine 3-dehydrogenase
			43	0.01692	0.5121	fp0992	N/A	-3.75	0.176473	236 -- 242	7 -- 13	Probable transcriptional regulator TetR family
			147	0.04134	0.5121	fp2339	pepX1	-3.75	0.176689	238 -- 249	3 -- 14	Xaa-Pro dipeptidyl-peptidase precursor
			181	0.04945	0.5121	fp0426	N/A	-3.74	0.177899	16 -- 23	5 -- 12	Cation-transporting ATPase P-type
			37	0.01489	0.5121	fp2094	N/A	-3.65	0.188309	238 -- 246	5 -- 13	Protein of unknown function precursor putative outer membrane protein
			71	0.02375	0.5121	fp0273	N/A	-3.59	0.195256	64 -- 71	4 -- 11
			198	0.05399	0.5121	fp2092	N/A	-3.58	0.196047	270 -- 279	2 -- 12
			33	0.01275	0.5121	fp0754	N/A	-3.56	0.198709	278 -- 285	25 -- 32	Probable Fe-S oxidoreductase N-terminal region
			8	0.00403	0.5121	fp0524	asd	-3.46	0.211591	247 -- 255	5 -- 13	Aspartate-semialdehyde dehydrogenase
			155	0.04292	0.5121	fp1402	N/A	-3.38	0.222462	255 -- 263	3 -- 12	Protein of unknown function precursor
			62	0.02147	0.5121	fp1334	rplV	-3.36	0.225871	231 -- 245	55 -- 71	50S ribosomal protein L22
			60	0.02109	0.5121	fp2268	N/A	-3.32	0.231329	33 -- 42	4 -- 13
			196	0.05315	0.5121	fp0339	ppa	-3.32	0.231578	143 -- 149	5 -- 11	Inorganic diphosphatase
			72	0.02383	0.5121	fp0590	bfmBB	-3.28	0.237471	287 -- 294	1 -- 8	Dihydrolipoyllysine-residue (2-methylpropanoyl)transferase
			200	0.0545	0.5121	fp0255	N/A	-3.2	0.2487	270 -- 278	4 -- 12	Homoserine dehydrogenase
			187	0.0515	0.5121	fp2358	uppP	-3.12	0.262422	19 -- 26	25 -- 32	Undecaprenyl-diphosphatase
			124	0.03571	0.5121	fp1995	N/A	-3.1	0.265777	11 -- 18	5 -- 12	Probable ABC-type iron(III)-transport system ATPase component
			28	0.01091	0.5121	fp1229	N/A	-3	0.282259	233 -- 240	1 -- 8	Probable FAD-dependent dehydrogenase
			112	0.03403	0.5121	fp0263	N/A	-2.94	0.292823	273 -- 281	4 -- 12	Hypothetical protein precursor
			7	0.003914	0.5121	fp0408	fabD	-2.94	0.2932	269 -- 277	2 -- 10	Malonyl CoA-acyl carrier protein transacylase
			174	0.04832	0.5121	fp0275	aspS	-2.84	0.311626	160 -- 166	5 -- 11	Aspartate--tRNA ligase
			189	0.05192	0.5121	fp2064	mraW	-2.79	0.321204	27 -- 35	6 -- 14	S-adenosyl-methyltransferase MraW
			194	0.05271	0.5121	fp0867	N/A	-2.75	0.330015	6 -- 12	7 -- 13	Probable transmembrane protein of unknown function
			86	0.02646	0.5121	fp2253	N/A	-2.74	0.330837	287 -- 294	2 -- 9	Probable coenzyme F390 synthetase
			30	0.01153	0.5121	fp1048	tal	-2.63	0.354512	68 -- 74	8 -- 14	Transaldolase
			157	0.04334	0.5121	fp0666	N/A	-2.6	0.36094	63 -- 72	23 -- 32	ATP-dependent RNA helicase DEAD box family
			171	0.04791	0.5121	fp1422	maf	-2.57	0.367375	133 -- 145	1 -- 13	Septum formation protein Maf
			104	0.03238	0.5121	fp1453	N/A	-2.49	0.386042	118 -- 127	4 -- 12	Protein of unknown function precursor
			168	0.04722	0.5121	fp0744	N/A	-2.43	0.399276	288 -- 296	4 -- 12	Probable metalloprotease
			75	0.02502	0.5121	fp1347	N/A	-2.4	0.40542	32 -- 39	3 -- 10	23S rRNA (guanosine(2251)-2'-O)-methyltransferase RlmB
			186	0.05148	0.5121	fp2327	N/A	-2.36	0.415949	287 -- 299	22 -- 34	3-oxoacyl-(acyl-carrier-protein) synthase
			166	0.0467	0.5121	fp2272	N/A	-2.29	0.432901	79 -- 87	3 -- 11	Probable ABC-type transport system ATPase component
			49	0.01826	0.5121	fp2225	nuoG	-2.25	0.442526	154 -- 162	3 -- 11	NADH dehydrogenase I G subunit N-terminal region
			184	0.05047	0.5121	fp1721	ggt	-2.23	0.447786	72 -- 80	24 -- 32	Gamma-glutamyltransferase
			70	0.02373	0.5121	fp1651	N/A	-2.18	0.460793	163 -- 171	2 -- 10	Membrane protein containing an internal histidine kinase domain
			141	0.03948	0.5121	fp2482	N/A	-2.18	0.46102	266 -- 275	3 -- 12
			34	0.01278	0.5121	fp0572	argK	-2.16	0.467915	67 -- 74	8 -- 15	Transport binding protein kinase ArgK
			172	0.04796	0.5121	fp1713	porQ	-2.05	0.496221	180 -- 188	4 -- 12	Protein of unknown function precursor PorQ
			118	0.03502	0.5121	fp1636	N/A	-2.04	0.49973	241 -- 247	59 -- 65
			123	0.03562	0.5121	fp1621	N/A	-2.02	0.505318	288 -- 294	23 -- 29	Protein of unknown function putative methyltransferase
			120	0.0352	0.5121	fp1340	rpsJ	-1.98	0.515701	214 -- 220	3 -- 9	30S ribosomal protein S10
			46	0.01738	0.5121	fp0608	N/A	-1.97	0.518706	84 -- 92	43 -- 51	Probable superoxide dismutase
			127	0.03627	0.5121	fp1241	N/A	-1.96	0.521314	11 -- 18	4 -- 11	Probable transmembrane protein of unknown function
			48	0.01801	0.5121	fp1323	rplR	-1.74	0.588993	8 -- 14	59 -- 65	50S ribosomal protein L18
			119	0.03505	0.5121	fp2382	pdxA	-1.73	0.591353	253 -- 261	28 -- 36	4-hydroxythreonine-4-phosphate dehydrogenase PdxA
			13	0.005009	0.5121	fp1414	N/A	-1.72	0.592646	276 -- 283	2 -- 9
			53	0.02013	0.5121	fp1403	N/A	-1.69	0.604252	85 -- 92	8 -- 15
			99	0.03012	0.5121	fp2070	nadE	-1.65	0.614421	109 -- 116	4 -- 11	NH(3)-dependent NAD(+) synthetase
			148	0.04153	0.5121	fp2246	N/A	-1.39	0.695663	42 -- 49	5 -- 12	Probable acyltransferase
			41	0.01648	0.5121	fp0880	N/A	-1.2	0.752999	190 -- 197	4 -- 11	Probable multidrug resistance protein. AcrB/AcrD/AcrF family protein
			132	0.03681	0.5121	fp0678	N/A	-1.06	0.79572	120 -- 126	28 -- 34	Protein of unknown function precursor
			20	0.007501	0.5121	fp1135	rpmE	-0.66	0.897855	20 -- 26	59 -- 65	50S ribosomal protein L31
			165	0.04665	0.5121	fp0322	accD	-0.65	0.900888	90 -- 96	2 -- 8	acetyl-CoA carboxylase carboxyltransferase subunit beta

## Sheet: Rfp62
Locustag=THC0290_N_0884			OUTPUT
Name=Rfp62
INPUT_sequence	Genome_blastn_eval		Rank	CopraRNA p-value	CopraRNA fdr value	Locus Tag	Gene Name	Energy [kcal/mol]	IntaRNA p-value	Position mRNA	Position sRNA	Annotation (retrieved from the complete genome sequence of strain JIP02/86, Duchaud E. et al Nature Biotechno 2007)	Additional homologs
>NC_009613	Flavobacterium psychrophilum JIP02/86 strain=JIP02/86 eval=1.04e-49		1	1.407e-05	0.02462	fp1201	lipB	-37.03	2.3e-05	20 -- 128	15 -- 140	Lipoyl(octanoyl) transferase
TTTGTGGTTTGCAACGCAGATGACACGGATTTGATAAATTAAAAAAAAATGGATTTGTTTGTTTTTGGAAATAGCTGGGTCAAAATTTTG			2	2.288e-05	0.02462	fp0981	kdsB	-34.96	4.4e-05	66 -- 144	23 -- 140	3-deoxy-manno-octulosonate cytidylyltransferase
AATGCTGAATGCTGATGTGCTGCGCCGCGTGAGGGATAGCAGCGGAAATC			3	3.284e-05	0.02462	fp0755	N/A	-33.41	7.3e-05	161 -- 259	49 -- 130
>NZ_CP007627	Flavobacterium psychrophilum strain=CSF259-93 eval=1.99e-51		4	8.296e-05	0.04664	fp1866	relA	-30.92	0.000164	81 -- 138	86 -- 140	GTP diphosphokinase
CAGTTTGTGGTTTGCAACGCAGATGACACGGATTTGATAAATTAAAAAAAATGGATTTGTTTGTTTTTGGAAATAGCTGGGTCAAAATTT			5	0.0003151	0.1417	fp1867	N/A	-27.44	0.000529	162 -- 231	25 -- 105	Probable tRNA/rRNA methyltransferase
TGAATGCTGAATGCTGATGTGCTGCGCCGCGTGAGGGATAGCAGCGGAAATC			6	0.0005271	0.1976	fp1670	trxB2	-26.26	0.000793	87 -- 110	117 -- 140	Thioredoxin-disulfide reductase
>NZ_CP008902	Flavobacterium psychrophilum strain=950106-1/1 eval=2.81e-49		7	0.001115	0.3581	fp1196	N/A	-23.71	0.001942	98 -- 149	87 -- 135	Cysteine synthase/cystathionine beta-synthase family protein
CAGTTTGTGGTTTGCAACGCAGATGACACGGATTTGATAAATTAAAAAAAATGGATTTGTTTGTTTTTGGAAATAGCTGGGTCAAAATTT			8	0.001606	0.4201	fp2450	dut	-23.48	0.002107	131 -- 208	7 -- 67	dUTP diphosphatase
TGAATGCTGATGTGCTGATGTGCTGCGCCGCGTGAGGGATAGCAGCGGAAATC			9	0.001681	0.4201	fp0024	gldH	-22.38	0.003126	127 -- 190	50 -- 103	Gliding motility lipoprotein precursor GldH
			10	0.002004	0.4506	fp0922	lolC	-21.82	0.003833	166 -- 275	51 -- 140	Lipoprotein releasing system transmembrane protein LolC
Sequence alignment was produced using Multalin tool using default parameters (http://multalin.toulouse.inra.fr/multalin/multalin.html).			11	0.0028	0.5285	fp0690	N/A	-23.2	0.002327	2 -- 72	27 -- 105	Probable TonB-dependent outer membrane receptor precursor
			12	0.00282	0.5285	fp0733	N/A	-22.02	0.003559	114 -- 210	61 -- 139
			13	0.00359	0.621	fp0888	aldH	-21.01	0.005146	48 -- 132	52 -- 135	Aldehyde dehydrogenase
			14	0.003969	0.6376	fp2237	N/A	-20.62	0.005917	57 -- 107	51 -- 104	Protein of unknown function precursor
			15	0.0046	0.6779	fp1789	manA	-19.57	0.008715	6 -- 97	2 -- 106	Mannose-6-phosphate isomerase
			16	0.005039	0.6779	fp0681	glyA	-20	0.007452	216 -- 259	50 -- 90	Glycine hydroxymethyltransferase
			17	0.005216	0.6779	fp0249	N/A	-20.24	0.006817	8 -- 86	26 -- 95	Putative phospho-2-dehydro-3-deoxyheptonate aldolase
The use of three sRNA homologs with some degree of divergence is mandatory for CopraRNA tool.			18	0.005674	0.6779	fp1031	N/A	-19.92	0.007656	243 -- 269	50 -- 81	Translation initiation factor SUI1 family protein
If this criteria is true, the list of putative sRNA targets is ranked based on CopraRNA p-value. If not, the list is ranked based on IntaRNA p-value.			19	0.005776	0.6779	fp2457	atpG	-20.35	0.006547	205 -- 263	3 -- 67	ATP synthase gamma subunit
			20	0.006028	0.6779	fp0520	N/A	-20.29	0.006691	223 -- 295	74 -- 138	TPR-domain containing protein
			21	0.006766	0.7246	fp0123	N/A	-19.88	0.007785	149 -- 210	26 -- 103
			22	0.007649	0.7341	fp0416	apaG	-19.18	0.010069	83 -- 114	51 -- 81	Protein ApaG
			23	0.007815	0.7341	fp0006	N/A	-21.14	0.004901	217 -- 276	77 -- 137	Protein of unknown function precursor; putative adhesin
			24	0.007834	0.7341	fp0955	hisA	-19.47	0.009066	94 -- 131	103 -- 140	1-(5-phosphoribosyl)-5-((5- phosphoribosylamino)methylideneamino)imidazole-4- carboxamide isomerase
			25	0.008757	0.7878	fp1848	N/A	-20.03	0.007361	132 -- 189	50 -- 105
			26	0.009458	0.8093	fp0582	N/A	-18.65	0.012292	245 -- 272	52 -- 83
			27	0.009716	0.8093	fp0687	N/A	-18.59	0.012553	167 -- 200	50 -- 81	Acetyltransferase GNAT family
			28	0.01073	0.8473	fp2331	N/A	-18.59	0.012581	147 -- 221	47 -- 112	Probable transmembrane protein of unknown function
			29	0.01104	0.8473	fp2188	N/A	-19.75	0.008166	169 -- 255	27 -- 106
			30	0.0113	0.8473	fp1765	clpB	-18.11	0.01506	246 -- 298	56 -- 113	ATPase with chaperone activity ATP-binding subunit
			31	0.01182	0.8578	fp1931	ndh	-17.9	0.016289	186 -- 212	50 -- 80	NADH dehydrogenase
			32	0.01277	0.8976	fp0411	purT	-18.06	0.0153	156 -- 166	117 -- 127	Phosphoribosylglycinamide formyltransferase 2
			33	0.01345	0.8991	fp2215	kynU	-17.84	0.016667	228 -- 282	51 -- 108	Kynureninase
			34	0.01359	0.8991	fp2049	rpe	-18.04	0.015428	76 -- 97	117 -- 138	Ribulose-phosphate 3-epimerase
			35	0.01415	0.9091	fp0667	N/A	-17.2	0.02118	111 -- 237	2 -- 107	Probable sigma-54 dependent two-component system response regulatory protein
			36	0.01613	0.9418	fp1669	N/A	-17.1	0.022028	1 -- 43	74 -- 112	NifU-like protein
			37	0.01638	0.9418	fp0145	pgi	-16.33	0.029422	135 -- 220	1 -- 90	Glucose-6-phosphate isomerase
			38	0.01647	0.9418	fp1537	N/A	-17.34	0.020057	20 -- 59	26 -- 68
			39	0.01664	0.9418	fp2103	yyaL	-16.93	0.023438	209 -- 299	50 -- 140	Protein of unknown function YyaL
			40	0.01675	0.9418	fp0965	N/A	-17.08	0.022149	92 -- 118	52 -- 79	Probable DNA polymerase III subunit
			41	0.01869	0.9645	fp1550	N/A	-17.08	0.022187	117 -- 184	53 -- 135	Hypothetical protein
			42	0.01896	0.9645	fp1381	manC	-18.12	0.014987	35 -- 73	93 -- 136	Mannose-1-phosphate guanylyltransferase (GDP)
			43	0.01898	0.9645	fp1026	N/A	-15.98	0.033649	106 -- 191	30 -- 140	Fumarylacetoacetate hydrolase family protein
			44	0.01959	0.9645	fp1985	groL	-16.69	0.025659	234 -- 278	93 -- 134	60 kDa chaperonin GroEL
			45	0.02097	0.9645	fp1802	yghO	-18.06	0.015349	121 -- 257	27 -- 124	Protein of unknown function YghO
			46	0.02168	0.9645	fp1018	N/A	-16.57	0.026861	41 -- 80	52 -- 94
			47	0.02193	0.9645	fp2352	aat	-16.56	0.027012	203 -- 247	52 -- 95	Leucyltransferase
			48	0.02491	0.9645	fp2333	N/A	-16.43	0.028359	250 -- 281	109 -- 135	Probable S41A family C-terminal processing peptidase precursor
			49	0.02519	0.9645	fp2299	gspD	-16.9	0.023702	180 -- 246	27 -- 95	Putative bacterial general secretion pathway protein D precursor
			50	0.02647	0.9645	fp0226	hppD	-16.31	0.029672	66 -- 142	16 -- 96	4-hydroxyphenylpyruvate dioxygenase
			51	0.02759	0.9645	fp2471	upp	-15.98	0.033598	197 -- 264	24 -- 90	Uracil phosphoribosyltransferase
			52	0.02765	0.9645	fp1585	N/A	-16.36	0.029119	124 -- 161	100 -- 135
			53	0.02851	0.9645	fp0525	N/A	-16.79	0.024726	89 -- 156	28 -- 99
			54	0.02855	0.9645	fp2451	N/A	-16	0.033339	5 -- 72	46 -- 102	Probable polysaccharide biosynthesis protein
			55	0.03122	0.9645	fp2071	N/A	-15.82	0.035816	59 -- 132	31 -- 98	Two-component system response regulatory protein LuxR family
			56	0.03128	0.9645	fp1799	N/A	-16.93	0.023483	75 -- 152	27 -- 105
			57	0.03187	0.9645	fp0541	folC	-15.85	0.035289	231 -- 297	66 -- 136	Bifunctional protein : Folylpolyglutamate synthase and Dihydrofolate synthase
			58	0.0325	0.9645	fp1350	N/A	-15.15	0.046118	89 -- 161	27 -- 111	Protein of unknown function precursor
			59	0.03288	0.9645	fp0887	N/A	-15.23	0.044844	179 -- 243	51 -- 109	Probable 23S rRNA pseudouridine synthase
			60	0.03371	0.9645	fp0422	N/A	-15.77	0.036464	87 -- 117	86 -- 108	Probable ABC-type transport system ATPase and permease components
			61	0.03433	0.9645	fp1190	rpsU	-15.6	0.038899	47 -- 137	54 -- 137	30S ribosomal protein S21
			62	0.03438	0.9645	fp0188	sfp	-15.44	0.041255	161 -- 228	76 -- 140	Probable phosphopantetheinyl transferase
			63	0.03554	0.9645	fp0165	N/A	-15	0.048884	69 -- 115	33 -- 68	Glycosyl transferase group 2 family protein
			64	0.03568	0.9645	fp0746	rimK	-15.62	0.038626	45 -- 91	41 -- 98	Ribosomal protein S6 modification protein RimK
			65	0.03573	0.9645	fp2235	haaO	-15.4	0.042028	98 -- 149	51 -- 102	3-hydroxyanthranilate 3 4-dioxygenase
			66	0.03618	0.9645	fp2195	N/A	-15.78	0.036317	176 -- 297	2 -- 108	Probable ABC-type transport system permease component
			67	0.0364	0.9645	fp1525	N/A	-15.33	0.0431	231 -- 263	52 -- 79	Probable CRISPR-associated (Cas) protein. Cas 1 family
			68	0.03703	0.9645	fp0343	N/A	-15.26	0.044293	41 -- 77	43 -- 81	Probable lipoprotein precursor
			69	0.03705	0.9645	fp0078	N/A	-14.13	0.068116	8 -- 55	47 -- 95	Protein of unknown function precursor
			70	0.0378	0.9645	fp1997	asnB	-15.35	0.042829	34 -- 97	46 -- 103	Asparagine synthetase [glutamine-hydrolyzing]
			71	0.03873	0.9645	fp0381	N/A	-15.2	0.045324	109 -- 170	27 -- 82	Probable transmembrane protein of unknown function
			72	0.03898	0.9645	fp1337	rplW	-14.73	0.054182	245 -- 299	54 -- 103	50S ribosomal protein L23
			73	0.03907	0.9645	fp1062	N/A	-16.17	0.031263	228 -- 257	72 -- 106
			74	0.03913	0.9645	fp0574	glcD	-17.22	0.021031	68 -- 215	3 -- 140	(S)-2-hydroxy-acid oxidase
			75	0.03991	0.9645	fp0049	crt	-15.3	0.043556	134 -- 192	28 -- 85	Probable 3-hydroxybutyryl-CoA dehydratase
			76	0.04036	0.9645	fp2080	rlmN	-15.71	0.037269	2 -- 39	67 -- 105	23S rRNA (adenine(2503)-C(2))-methyltransferase RlmN
			77	0.04052	0.9645	fp0007	N/A	-15.38	0.042298	213 -- 258	74 -- 105	Probable helicase
			78	0.04053	0.9645	fp2068	gldC	-15.09	0.047167	74 -- 109	50 -- 80	Gliding motility protein GldC
			79	0.04055	0.9645	fp0213	N/A	-16.13	0.031753	114 -- 241	11 -- 134
			80	0.04096	0.9645	fp2102	N/A	-15.68	0.037728	2 -- 59	52 -- 99
			81	0.04169	0.9645	fp0849	uvrA2	-14.75	0.053805	45 -- 117	53 -- 114	Excinuclease ABC A subunit UvrA2
			82	0.04186	0.9645	fp0469	nusA	-15.2	0.045309	138 -- 151	114 -- 127	Transcription elongation protein NusA
			83	0.04226	0.9645	fp1687	N/A	-15.68	0.037711	74 -- 146	27 -- 102	Probable two-component system sensor histidine kinase
			84	0.04387	0.9645	fp0907	N/A	-15.45	0.041131	150 -- 234	9 -- 105	Hypothetical protein precursor
			85	0.04408	0.9645	fp2097	skp	-15.32	0.043197	5 -- 50	94 -- 137	Outer membrane chaperone precursor Skp (OmpH)
			86	0.04449	0.9645	fp2373	N/A	-14.87	0.051315	39 -- 81	50 -- 81	Probable saccharopine dehydrogenase
			87	0.04541	0.9645	fp1570	N/A	-14.78	0.053135	1 -- 41	50 -- 103
			88	0.04553	0.9645	fp0152	N/A	-14.93	0.050266	230 -- 279	50 -- 104
			89	0.04575	0.9645	fp0759	N/A	-13.99	0.071865	27 -- 99	30 -- 103	Probable transmembrane protein of unknown function
			90	0.04585	0.9645	fp1084	N/A	-15.64	0.038285	111 -- 171	50 -- 103
			91	0.04708	0.9645	fp2340	N/A	-14.51	0.058965	238 -- 270	57 -- 91	Hypothetical protein
			92	0.04769	0.9645	fp0084	N/A	-13.74	0.079215	44 -- 96	56 -- 103
			93	0.04777	0.9645	fp2085	clpP	-15.13	0.04656	216 -- 251	47 -- 81	S14 family ATP-dependent Clp protease proteolytic subunit
			94	0.04872	0.9645	fp0020	elaA	-14.54	0.058262	210 -- 246	66 -- 98	ElaA protein
			95	0.0489	0.9645	fp2105	N/A	-15.33	0.043179	35 -- 128	4 -- 92	Peptidase M22 family
			96	0.04988	0.9645	fp0579	N/A	-14.9	0.050796	23 -- 42	7 -- 28	Probable cytochrome c peroxidase precursor
			97	0.05052	0.9645	fp0585	N/A	-14.23	0.065507	178 -- 265	56 -- 139
			98	0.05097	0.9645	fp0615	trxB1	-16.04	0.032916	106 -- 151	26 -- 76	Thioredoxin-disulfide reductase
			99	0.0513	0.9645	fp0116	N/A	-14.28	0.064232	61 -- 93	61 -- 91
			100	0.05176	0.9645	fp1221	N/A	-14.09	0.069085	4 -- 47	50 -- 111
			101	0.05212	0.9645	fp1540	N/A	-14.01	0.071288	209 -- 245	55 -- 90
			102	0.05234	0.9645	fp2350	N/A	-14.45	0.060255	223 -- 271	51 -- 108
			103	0.05239	0.9645	fp2229	nuoD	-14.48	0.059733	12 -- 35	51 -- 81	NADH dehydrogenase I D subunit
			104	0.05244	0.9645	fp2337	N/A	-14.83	0.052146	216 -- 258	74 -- 108	Probable proton-dependent di-tripeptide transporter
			105	0.05338	0.9645	fp0102	N/A	-15.09	0.047287	52 -- 180	27 -- 135	Putative plasmid stabilization system protein
			106	0.05463	0.9645	fp0407	N/A	-14.48	0.059706	39 -- 70	50 -- 80	Hypothetical lipoprotein precursor
			107	0.05613	0.9645	fp0279	dxs	-14.26	0.06492	62 -- 94	49 -- 81	1-deoxy-D-xylulose-5-phosphate synthase
			108	0.0568	0.9645	fp2039	N/A	-13.78	0.077827	123 -- 172	50 -- 104
			109	0.0571	0.9645	fp2295	N/A	-14.84	0.05188	176 -- 219	27 -- 69
			110	0.05722	0.9645	fp0383	N/A	-14.65	0.055957	78 -- 170	26 -- 112	Hypothetical protein
			111	0.05729	0.9645	fp0233	ribF	-14.05	0.070187	247 -- 293	102 -- 135	Bifunctional riboflavin biosynthesis protein RibF : Riboflavin kinase and FMN adenylyltransferase
			112	0.05734	0.9645	fp1767	N/A	-14.9	0.050732	93 -- 154	28 -- 94	Probable thiamine diphosphokinase
			113	0.05831	0.9645	fp1206	acdS	-14.22	0.065876	245 -- 300	57 -- 109	1-aminocyclopropane-1-carboxylate deaminase
			114	0.05887	0.9645	fp0119	bioF	-14.19	0.066607	84 -- 123	50 -- 81	8-amino-7-oxononanoate synthase
			115	0.05959	0.9645	fp0212	N/A	-14.25	0.065181	252 -- 286	59 -- 97
			116	0.0597	0.9645	fp2426	N/A	-14.01	0.071256	63 -- 142	50 -- 127	Probable lipoprotein precursor
			117	0.06028	0.9645	fp2449	N/A	-14.07	0.069771	36 -- 97	30 -- 80	Probable sugar phosphate nucleotydyl transferase
			118	0.06033	0.9645	fp0640	serC	-13.46	0.08784	260 -- 288	78 -- 106	Phosphoserine transaminase
			119	0.06095	0.9645	fp1752	mqo	-14.81	0.052548	118 -- 188	27 -- 98	Malate dehydrogenase (acceptor)
			120	0.06194	0.9645	fp0070	N/A	-14.24	0.06523	60 -- 126	49 -- 104
			121	0.06221	0.9645	fp0128	batD	-14.13	0.068184	48 -- 95	24 -- 67	BatD protein
			122	0.06264	0.9645	fp2489	rnr	-14.68	0.055292	45 -- 103	18 -- 70	Ribonuclease R
			123	0.06266	0.9645	fp1172	prfC	-14.18	0.066744	78 -- 164	25 -- 102	Peptide chain release factor 3 (RF-3)
			124	0.06278	0.9645	fp0695	purL	-14.72	0.054477	262 -- 299	69 -- 107	Phosphoribosylformylglycinamidine synthase
			125	0.06417	0.9645	fp1625	pabB	-13.89	0.07475	181 -- 241	46 -- 106	Para-aminobenzoate synthase component I
			126	0.066	0.9645	fp1099	N/A	-14.25	0.065049	198 -- 295	2 -- 96
			127	0.06634	0.9645	fp0764	N/A	-14.66	0.055729	2 -- 86	26 -- 101	ThiJ/PfpI family protein
			128	0.06692	0.9645	fp0073	N/A	-14.23	0.065713	134 -- 178	60 -- 104	Protein of unknown function precursor
			129	0.06732	0.9645	fp0384	N/A	-13.84	0.076084	3 -- 96	30 -- 107
			130	0.06817	0.9645	fp2172	N/A	-13.01	0.104547	1 -- 39	42 -- 104
			131	0.06857	0.9645	fp1471	N/A	-13.82	0.076836	272 -- 297	50 -- 80	Probable hybrid two-component system sensor histidine kinase and response regulator receiver
			132	0.06904	0.9645	fp1304	N/A	-15.84	0.035482	226 -- 288	30 -- 91
			133	0.06922	0.9645	fp1955	N/A	-13.97	0.072517	247 -- 262	109 -- 124	Probable lipoprotein precursor
			134	0.06994	0.9645	fp0600	lgt	-15.15	0.046148	129 -- 232	27 -- 112	Prolipoprotein diacylglyceryl transferase
			135	0.07079	0.9645	fp0650	N/A	-13.84	0.07598	170 -- 200	49 -- 77	Probable M28 family aminopeptidase precursor
			136	0.07104	0.9645	fp0991	N/A	-13.68	0.081028	104 -- 155	46 -- 95
			137	0.07128	0.9645	fp1092	rhlE	-12.88	0.109544	235 -- 296	51 -- 112	Putative ATP-dependent RNA helicase RhlE
			138	0.07133	0.9645	fp0162	N/A	-13.92	0.07377	1 -- 34	31 -- 69
			139	0.07181	0.9645	fp0498	menC	-13.83	0.07634	253 -- 265	112 -- 124	O-succinylbenzoate synthase
			140	0.0721	0.9645	fp0738	N/A	-14.41	0.06115	33 -- 131	27 -- 105
			141	0.07215	0.9645	fp1080	N/A	-14.58	0.057352	17 -- 108	49 -- 140	Probable short-chain type dehydrogenase
			142	0.07226	0.9645	fp1227	N/A	-13.98	0.072104	156 -- 230	54 -- 102	Probable transcriptional regulator XRE family
			143	0.07263	0.9645	fp0854	N/A	-14.09	0.069288	231 -- 276	72 -- 114	Phosphoglucomutase/phosphomannomutase family protein
			144	0.0733	0.9645	fp0010	N/A	-13.65	0.081804	47 -- 81	48 -- 80	Probable transmembrane protein of unknown function
			145	0.07335	0.9645	fp1703	N/A	-13.65	0.081745	9 -- 33	56 -- 81
			146	0.07338	0.9645	fp1822	pyrD	-15.18	0.045617	59 -- 109	88 -- 140	Dihydroorotate oxidase
			147	0.07344	0.9645	fp2370	N/A	-13.82	0.076643	218 -- 279	51 -- 103	Probable TonB-dependent outer membrane receptor precursor
			148	0.07368	0.9645	fp1021	N/A	-13.61	0.083088	18 -- 57	66 -- 108	Two-component system response regulatory protein LytTR family
			149	0.07396	0.9645	fp2162	N/A	-14.41	0.061136	243 -- 300	54 -- 104	Protein of unknown function precursor
			150	0.07448	0.9645	fp1642	N/A	-14.06	0.070107	6 -- 55	53 -- 104	Glycosyl transferase group 2 family protein
			151	0.07504	0.9645	fp2368	pop	-13.77	0.07807	12 -- 22	117 -- 127	Prolyl oligopeptidase family protein precursor
			152	0.07583	0.9645	fp2289	N/A	-13.26	0.095021	177 -- 208	48 -- 87	TatD-related DNase
			153	0.07597	0.9645	fp1004	N/A	-13.82	0.076684	174 -- 240	27 -- 84	Probable M1 family metalloprotease precursor
			154	0.07638	0.9645	fp0434	thiF	-13.94	0.073279	28 -- 87	74 -- 127	Molybdopterin and thiamine biosynthesis protein
			155	0.07644	0.9645	fp1584	N/A	-14.27	0.064697	235 -- 262	74 -- 104	Hypothetical protein
			156	0.07648	0.9645	fp1460	bluB/cobT	-13.83	0.076436	161 -- 274	29 -- 140	Bifunctional protein : cob(II)yrinic acid a c-diamide reductase and nicotinate-nucleotide--dimethylbenzimidazole phosphoribosyltransferase
			157	0.07684	0.9645	fp1946	N/A	-14.17	0.067051	254 -- 300	90 -- 132	Protein of unknown function precursor
			158	0.0782	0.9645	fp1000	N/A	-12.72	0.116383	33 -- 109	10 -- 80	Phosphate transporter family protein
			159	0.07829	0.9645	fp0515	N/A	-13.48	0.087204	98 -- 132	46 -- 83	Nitroreductase
			160	0.07996	0.9645	fp1028	bfmBA	-14.2	0.066452	70 -- 156	4 -- 70	3-methyl-2-oxobutanoate dehydrogenase (2-methylpropanoyl-transferring)
			161	0.08037	0.9645	fp1401	N/A	-13.16	0.098706	19 -- 100	18 -- 105	Hypothetical lipoprotein precursor
			162	0.08187	0.9645	fp2216	rpmA	-13.44	0.088777	41 -- 95	56 -- 112	50S ribosomal protein L27
			163	0.08221	0.9645	fp2089	N/A	-13.05	0.102935	77 -- 106	52 -- 83	Putative ABC-type transport system permease component
			164	0.08267	0.9645	fp1895	N/A	-13.28	0.094287	16 -- 47	74 -- 113
			165	0.08287	0.9645	fp1086	N/A	-13.51	0.086378	233 -- 297	21 -- 93	Hypothetical protein
			166	0.08361	0.9645	fp0418	N/A	-13.88	0.07487	267 -- 289	91 -- 113	Probable methyltransferase
			167	0.08421	0.9645	fp1825	ytxJ	-14.26	0.064952	93 -- 143	54 -- 107	Protein of unknown function YtxJ
			168	0.08638	0.9645	fp0097	fmo	-13.68	0.080945	243 -- 287	50 -- 108	Flavomodulin
			169	0.08736	0.9645	fp2327	N/A	-13.48	0.087234	166 -- 181	125 -- 140	3-oxoacyl-(acyl-carrier-protein) synthase
			170	0.08788	0.9645	fp1957	hutU	-13.18	0.097881	234 -- 261	49 -- 78	Urocanate hydratase
			171	0.088	0.9645	fp1712	cmk	-13.03	0.103616	233 -- 259	101 -- 126	Cytidylate kinase
			172	0.08801	0.9645	fp0860	N/A	-13.62	0.082791	15 -- 109	50 -- 132	Putative aminotransferase
			173	0.0882	0.9645	fp0447	ilvH	-13.44	0.08878	140 -- 220	49 -- 131	acetolactate synthase small subunit
			174	0.08878	0.9645	fp0228	N/A	-13.25	0.095411	125 -- 184	47 -- 105	Tryptophan 2 3-dioxygenase
			175	0.0912	0.9645	fp2011	N/A	-13.04	0.103239	234 -- 252	50 -- 68
			176	0.09146	0.9645	fp0613	accA	-13.14	0.099284	23 -- 39	65 -- 79	acetyl-CoA carboxylase carboxyltransferase subunit alpha
			177	0.0919	0.9645	fp2381	N/A	-12.84	0.111294	24 -- 70	50 -- 113
			178	0.09199	0.9645	fp1562	N/A	-13.17	0.098242	55 -- 104	49 -- 104	Predicted ATP-dependent endonuclease of the OLD family
			179	0.09274	0.9645	fp1800	N/A	-13.25	0.095194	274 -- 284	117 -- 126
			180	0.09314	0.9645	fp0206	N/A	-13.15	0.098855	162 -- 226	52 -- 104	Protein of unknown function MmcQ
			181	0.0933	0.9645	fp0590	bfmBB	-14.18	0.066961	91 -- 149	21 -- 70	Dihydrolipoyllysine-residue (2-methylpropanoyl)transferase
			182	0.09377	0.9645	fp1600	N/A	-11.06	0.215299	52 -- 100	53 -- 96	Putative UDP-3-O-[3-hydroxymyristoyl] glucosamine N-acyltransferase
			183	0.09409	0.9645	fp0505	N/A	-12.97	0.106151	41 -- 67	43 -- 67	Probable transcriptional regulator TetR family
			184	0.09476	0.9645	fp0077	sirR	-13.28	0.094212	224 -- 263	26 -- 69	Probable metal-dependent transcriptional regulator
			185	0.09514	0.9645	fp1149	N/A	-13.25	0.095118	41 -- 65	104 -- 127	Rhomboid family protein
			186	0.09537	0.9645	fp1431	N/A	-13.44	0.088511	215 -- 275	51 -- 114	Hypothetical protein
			187	0.096	0.9645	fp0066	proC	-12.99	0.10535	92 -- 118	47 -- 81	Pyrroline-5-carboxylate reductase
			188	0.09624	0.9645	fp2343	N/A	-13.07	0.102087	186 -- 219	26 -- 66	Hypothetical protein
			189	0.0964	0.9645	fp0385	N/A	-12.51	0.126215	222 -- 299	51 -- 107	Hypothetical protein
			190	0.0969	0.9645	fp2303	N/A	-13.17	0.09819	169 -- 237	29 -- 96	Probable outer membrane protein precursor OmpH family
			191	0.09708	0.9645	fp0062	xth	-12.21	0.141237	227 -- 280	1 -- 68	Exodeoxyribonuclease III
			192	0.09711	0.9645	fp0862	N/A	-13.29	0.094023	226 -- 296	49 -- 104	Rhomboid family protein
			193	0.09718	0.9645	fp0691	N/A	-13.88	0.075038	89 -- 149	49 -- 113	Probable lipoprotein precursor
			194	0.09725	0.9645	fp1198	N/A	-12.96	0.106429	12 -- 41	51 -- 80	Probable lipoprotein precursor
			195	0.09824	0.9645	fp2128	N/A	-12.25	0.138996	247 -- 268	111 -- 130
			196	0.09859	0.9645	fp1709	N/A	-13.05	0.102751	86 -- 176	52 -- 140
			197	0.099	0.9645	fp0125	N/A	-12.92	0.107828	14 -- 75	29 -- 90
			198	0.09937	0.9645	fp0984	N/A	-13.32	0.092717	1 -- 37	39 -- 72	Probable transcriptional regulator AraC family
			199	0.09957	0.9645	fp1764	N/A	-12.51	0.12623	249 -- 276	51 -- 80	Probably involved in regulation of translation initiation
			200	0.1002	0.9645	fp1125	N/A	-12.76	0.114681	170 -- 220	27 -- 78

## Sheet: Rfp73
Locustag=THC0290_N_1125			OUTPUT
Name=Rfp73
INPUT_sequence	Genome_blastn_eval		Rank	CopraRNA p-value	CopraRNA fdr value	Locus Tag	Gene Name	Energy [kcal/mol]	IntaRNA p-value	Position mRNA	Position sRNA	Annotation	Additional homologs
>NC_009613	Flavobacterium psychrophilum JIP02/86 strain=JIP02/86 eval=6.81e-49		5	0.0002493	0.1145	fp2448	N/A	-22.09	0.000328	95 -- 166	68 -- 128	Hypothetical protein (not conserved in all F. psychrohilum strains)
GTGCAAATATATAAATTTAACCCCAAAGTTGGGTAAGAATTTCGCAAAGTTAGGTAAGATTTAGATTCTTTGTGTACTTTGTGAAATTCT			6	0.001264	0.4836	fp2216	rpmA	-18.24	0.001563	65 -- 94	95 -- 123	50S ribosomal protein L27
TTTCGCTCTTTGTGGCTAAGTAGTTAGGCTAAAACTGATTTTAA			11	0.003574	0.5833	fp0731	N/A	-15.87	0.004251	236 -- 254	112 -- 130	Protein of unknown function precursor
>NZ_CP007627	Flavobacterium psychrophilum strain=CSF259-93 eval=6.81e-49		14	0.005565	0.5833	fp2387	sufE	-14.88	0.006512	18 -- 37	114 -- 131	Cysteine desulfuration protein SufE
GTGCAAATATATAAATTTAACCCCAAAGTTGGGTAAGAATTTCGCAAAGTTAGGTAAGATTTAGATTCTTTGTGTACTTTGTGAAATTCT			16	0.006466	0.5833	fp0411	purT	-14.67	0.007116	14 -- 39	108 -- 133	Phosphoribosylglycinamide formyltransferase 2
TTTCGCTCTTTGTGGCTAAGTAGTTAGGCTAAAACTGATTTTAA			19	0.00703	0.5833	fp0349	N/A	-14.36	0.008155	50 -- 73	53 -- 75
>NZ_CP008902	Flavobacterium psychrophilum strain=950106-1/1 eval=6.81e-49		9	0.002864	0.5833	fp0602	N/A	-14.05	0.009324	2 -- 16	113 -- 126
GTGCAAATATATAAATTTAACCCCAAAGTTGGGTAAGAATTTCGCAAAGTTAGGTAAGATTTAGATTCTTTGTGTACTTTGTGAAATTCT			23	0.009752	0.5833	fp1493	N/A	-13.64	0.011176	226 -- 241	113 -- 127	Probable lipoprotein precursor
TTTCGCTCTTTGTGGCTAAGTAGTTAGGCTAAAACTGATTTTAA			7	0.002722	0.5833	fp1571	N/A	-13.59	0.011446	262 -- 291	1 -- 34		fp2295 fp1538
>NZ_CP017479	Flavobacterium gilvum strain=EM1308 eval=1.77e-08		18	0.006906	0.5833	fp0344	rpsP	-13.51	0.011837	144 -- 156	1 -- 13	30S ribosomal protein S16
AAATATCTAAAATTTAACCGCAAGGTCCGCAAAGGAATCGCAATGTACGCAAAGCTTTGTGTACTTTGTGTAATTCTTTGCGTTCTTAGT			32	0.01271	0.5833	fp2094	N/A	-13.06	0.014423	174 -- 185	1 -- 12	Protein of unknown function precursor putative outer membrane protein
GGTTAA			34	0.01286	0.5833	fp1810	N/A	-13.04	0.014583	56 -- 70	117 -- 132	Probable membrane fusion efflux lipoprotein precursor
>NC_009441	Flavobacterium johnsoniae UW101 strain=UW101; ATCC 17061 eval=2.50e-06		35	0.01287	0.5833	fp2467	sprE	-13.03	0.014603	246 -- 273	97 -- 125	SprE lipoprotein precursor
AAATAATTCTTTTTAACCGCAAAGTTCGCAAGGGATTACGCAAAGGACACAAGGAAATTTAAAAAACTTTGCGAACCTTGCGTAAATCTT			38	0.01342	0.5833	fp1718	mrsB1	-12.94	0.015199	221 -- 259	103 -- 129	Probable protein-methionine-S-oxide reductase MrsB1
TGCGACCTTTGCGGTTAAATA			39	0.01381	0.5833	fp2350	N/A	-12.88	0.015627	225 -- 262	95 -- 129
			12	0.004158	0.5833	fp0157	kbl	-12.77	0.016393	278 -- 300	96 -- 120	Glycine C-acetyltransferase
Sequence alignment was produced using Multalin tool using default parameters (http://multalin.toulouse.inra.fr/multalin/multalin.html).			51	0.01976	0.5833	fp1349	N/A	-12.72	0.016754	48 -- 77	97 -- 129	Putative AAA family ATPase
			27	0.01129	0.5833	fp0644	engD	-12.53	0.018249	169 -- 179	1 -- 11	GTP-dependent nucleic acid-binding protein EngD
			8	0.00283	0.5833	fp1820	guaB	-12.5	0.018454	162 -- 172	1 -- 11	IMP dehydrogenase
			42	0.01736	0.5833	fp0182	N/A	-12.38	0.019474	115 -- 128	1 -- 14
			44	0.01881	0.5833	fp0376	actE	-12.21	0.021037	283 -- 299	113 -- 129	Alternative complex III protein E precursor
			45	0.0193	0.5833	fp1095	N/A	-12.15	0.021565	181 -- 195	118 -- 132	Probable transmembrane protein of unknown function
			49	0.0196	0.5833	fp0991	N/A	-12.12	0.021886	175 -- 185	1 -- 11
			54	0.02023	0.5833	fp0207	N/A	-12.05	0.022571	106 -- 142	95 -- 128	Probable arylformamidase
			57	0.02093	0.5833	fp0468	N/A	-11.98	0.023317	129 -- 140	1 -- 12
			58	0.02121	0.5833	fp2381	N/A	-11.95	0.023621	153 -- 170	1 -- 18
The use of three sRNA homologs with some degree of divergence is mandatory for CopraRNA tool.			67	0.02261	0.5833	fp1195	dnaQ	-11.81	0.025127	123 -- 154	100 -- 132	Probable DNA polymerase III epsilon subunit
If this criteria is true, the list of putative sRNA targets is ranked based on CopraRNA p-value. If not, the list is ranked based on IntaRNA p-value.			73	0.02471	0.5833	fp2277	darC2	-11.62	0.02737	168 -- 184	117 -- 133	Probable acyl carrier protein involved in flexirubin-type pigment biosynthesis DarC2
			191	0.05165	0.5833	fp2146	N/A	-11.54	0.028331	22 -- 45	110 -- 130	Hypothetical protein
			52	0.02006	0.5833	fp1764	N/A	-11.5	0.028907	170 -- 180	1 -- 11	Probably involved in regulation of translation initiation
			30	0.0118	0.5833	fp1254	N/A	-11.5	0.028912	211 -- 233	53 -- 73
			78	0.02651	0.5833	fp0649	parC	-11.47	0.029285	116 -- 137	111 -- 134	Topoisomerase IV subunit A
			82	0.02731	0.5833	fp1213	pabC	-11.4	0.03014	69 -- 97	108 -- 133	Putative aminodeoxychorismate lyase precursor
			83	0.02734	0.5833	fp0949	mscS2	-11.4	0.030164	267 -- 288	106 -- 132	Probable small-conductance mechanosensitive ion channel MscS2
			90	0.02936	0.5833	fp2472	N/A	-11.22	0.032734	41 -- 84	94 -- 132	Probable transmembrane protein of unknown function
			92	0.03004	0.5833	fp0192	mfd	-11.2	0.03303	176 -- 187	1 -- 12	Transcription-repair coupling factor
			93	0.03032	0.5833	fp0451	N/A	-11.18	0.033331	11 -- 41	104 -- 132
			94	0.03053	0.5833	fp2014	murA	-11.16	0.033553	252 -- 262	95 -- 105	UDP-N-acetylglucosamine 1-carboxyvinyltransferase
			21	0.009483	0.5833	fp1220	N/A	-11.15	0.033744	38 -- 75	92 -- 130
			106	0.03228	0.5833	fp1817	N/A	-11.04	0.035409	180 -- 189	113 -- 122	Protein of unknown function precursor
			107	0.03242	0.5833	fp1581	N/A	-11.03	0.035555	213 -- 239	51 -- 75	Putative ATP/GTP-binding protein precursor
			110	0.03301	0.5833	fp2397	N/A	-10.99	0.036179	84 -- 112	99 -- 128	Probable M1 family aminopeptidase precursor
			79	0.02667	0.5833	fp0111	glmS	-10.98	0.036453	223 -- 238	95 -- 109	Glucosamine--fructose-6-phosphate aminotransferase [isomerizing]
			111	0.03331	0.5833	fp0415	pruA	-10.97	0.036508	169 -- 190	113 -- 132	1-pyrroline-5-carboxylate dehydrogenase
			76	0.02593	0.5833	fp1987	rpmH	-10.97	0.036517	130 -- 143	1 -- 14	50S ribosomal protein L34
			112	0.03333	0.5833	fp1476	ffh	-10.97	0.036517	172 -- 182	1 -- 11	Signal recognition particle protein
			113	0.03355	0.5833	fp2205	N/A	-10.96	0.036743	230 -- 263	100 -- 129	Protein of unknown function precursor
			100	0.03135	0.5833	fp2066	pcbD	-10.96	0.036748	164 -- 174	1 -- 11	Probable 2-hydroxy-6-oxo-6-phenylhexa-2 4-dienoic acid hydrolase
			25	0.01091	0.5833	fp0520	N/A	-10.9	0.037704	255 -- 264	1 -- 10	TPR-domain containing protein
			118	0.03458	0.5833	fp0444	N/A	-10.89	0.037836	248 -- 270	108 -- 129	Major facilitator superfamily (MFS) permease
			120	0.03492	0.5833	fp0299	fbp	-10.87	0.038191	169 -- 178	1 -- 10	Fructose-bisphosphatase
			131	0.03727	0.5833	fp0541	folC	-10.85	0.038617	229 -- 237	1 -- 9	Bifunctional protein : Folylpolyglutamate synthase and Dihydrofolate synthase
			123	0.03549	0.5833	fp0734	trmA	-10.84	0.038787	179 -- 198	2 -- 21	tRNA (uracil-5-)-methyltransferase
			125	0.03572	0.5833	fp2006	N/A	-10.83	0.039037	167 -- 177	1 -- 11	Branched-chain amino acid aminotransferase/4-amino-4-deoxychorismate lyase family protein
			13	0.005289	0.5833	fp1786	N/A	-10.78	0.03979	3 -- 13	1 -- 11
			130	0.03721	0.5833	fp2398	N/A	-10.74	0.040599	237 -- 246	1 -- 10	Hypothetical protein
			119	0.03463	0.5833	fp0895	thrS	-10.67	0.041783	173 -- 184	1 -- 12	Threonine--tRNA ligase
			140	0.0386	0.5833	fp2351	N/A	-10.66	0.042067	59 -- 69	1 -- 11
			126	0.03583	0.5833	fp0587	N/A	-10.64	0.042432	128 -- 140	1 -- 13		fp0442
			142	0.03912	0.5833	fp2155	N/A	-10.63	0.042615	230 -- 244	110 -- 129	Protein of unknown function; putative pseudogene N-terminal region
			128	0.03628	0.5833	fp1411	N/A	-10.57	0.043727	123 -- 134	2 -- 13	Probable sugar O-acetyltransferase
			63	0.02159	0.5833	fp2389	sufS	-10.56	0.043945	58 -- 70	97 -- 109	Cysteine desulfurase SufS
			84	0.02795	0.5833	fp0545	glnA	-10.52	0.044871	149 -- 161	2 -- 14	Glutamate--ammonia ligase
			152	0.04134	0.5833	fp0581	secA	-10.51	0.044936	70 -- 97	97 -- 123	Preprotein translocase SecA subunit
			153	0.04134	0.5833	fp1706	putA	-10.51	0.044938	175 -- 185	1 -- 11	Proline dehydrogenase
			91	0.02999	0.5833	fp1771	argD	-10.43	0.046558	281 -- 295	1 -- 14	Acetylornithine/succinyldiaminopimelate transaminase
			157	0.04295	0.5833	fp1157	ccoQ	-10.43	0.046627	59 -- 91	97 -- 132	Cytochrome c oxidase cbb3-type subunit IV
			61	0.0215	0.5833	fp2375	pckA	-10.42	0.04693	154 -- 169	1 -- 16	Phosphoenolpyruvate carboxykinase (ATP)
			10	0.003066	0.5833	fp0960	hisG	-10.36	0.048118	5 -- 15	2 -- 12	ATP phosphoribosyltransferase
			158	0.04366	0.5833	fp2169	N/A	-10.34	0.04864	172 -- 196	109 -- 133	Probable type III modification methyltransferase
			164	0.04578	0.5833	fp1069	N/A	-10.29	0.049585	153 -- 177	108 -- 133	Probable transmembrane protein of unknown function
			166	0.04621	0.5833	fp1666	hupA	-10.27	0.050038	148 -- 163	2 -- 17	Histone-like bacterial DNA-binding protein HU-alpha
			85	0.02835	0.5833	fp1959	N/A	-10.24	0.050843	1 -- 23	51 -- 75	Protein of unknown function precursor; putative adhesin	fp2244
			169	0.04699	0.5833	fp1959	N/A	-10.24	0.050843	1 -- 23	51 -- 75	Protein of unknown function precursor; putative adhesin	fp2244
			173	0.04775	0.5833	fp0208	N/A	-10.2	0.051643	4 -- 16	95 -- 106	Probable coproporphyrinogen oxidase
			174	0.04781	0.5833	fp2495	N/A	-10.2	0.051698	217 -- 259	95 -- 132	Hypothetical protein precursor
			179	0.04893	0.5833	fp2454	N/A	-10.15	0.052867	78 -- 115	99 -- 134	Putative siderophore biosynthesis protein
			185	0.04977	0.5833	fp0876	recJ	-10.11	0.053742	9 -- 23	95 -- 109	Single-stranded-DNA-specific exonuclease RecJ
			186	0.05005	0.5833	fp0648	N/A	-10.1	0.054038	117 -- 126	117 -- 126
			187	0.05051	0.5833	fp0597	folE2	-10.08	0.054514	154 -- 165	1 -- 12	GTP cyclohydrolase I
			47	0.01948	0.5833	fp2060	mraY	-10.07	0.054691	279 -- 293	117 -- 131	Phospho-N-acetylmuramoyl-pentapeptide- transferase
			188	0.05097	0.5833	fp2433	N/A	-10.06	0.054989	247 -- 258	1 -- 12	Protein of unknown function precursor putative outer membrane protein
			190	0.0514	0.5833	fp1512	N/A	-10.04	0.055444	129 -- 145	113 -- 130	Twin-arginine translocation pathway signal sequence domain protein precusor
			192	0.05173	0.5833	fp0061	N/A	-10.03	0.055784	227 -- 244	113 -- 129	Flagellar motor/Chemotaxis (MotB)-related lipoprotein precursor
			162	0.04513	0.5833	fp0746	rimK	-10.02	0.056152	199 -- 210	1 -- 12	Ribosomal protein S6 modification protein RimK
			193	0.0521	0.5833	fp0534	nusB	-10.02	0.056172	16 -- 41	106 -- 132	N utilization substance protein B homolog (NusB protein)
			200	0.05331	0.5833	fp0701	N/A	-9.97	0.057423	265 -- 283	53 -- 73
			40	0.01407	0.5833	fp2049	rpe	-9.66	0.065897	146 -- 155	1 -- 10	Ribulose-phosphate 3-epimerase
			138	0.03821	0.5833	fp0246	N/A	-9.57	0.068752	172 -- 183	117 -- 128	Probable type II endonuclease-methyltransferase fusion protein	fp0027 fp1567
			189	0.05139	0.5833	fp1464	N/A	-9.53	0.069732	178 -- 185	1 -- 8	Probable ABC-type iron(III)-transport system permease component
			65	0.02191	0.5833	fp0621	N/A	-9.52	0.070175	48 -- 66	113 -- 132	Protein of unknown function precursor putative sensor of anti-sigma and ECF sigma factor
			132	0.03741	0.5833	fp2069	gldB	-9.45	0.072588	84 -- 95	2 -- 13	Gliding motility lipoprotein precursor GldB
			181	0.04914	0.5833	fp2339	pepX1	-9.31	0.077084	88 -- 104	118 -- 133	Xaa-Pro dipeptidyl-peptidase precursor
			60	0.02147	0.5833	fp2404	N/A	-9.31	0.077114	174 -- 184	1 -- 11	Probable transcriptional regulator TetR family
			101	0.03157	0.5833	fp0964	N/A	-9.26	0.078744	273 -- 282	1 -- 10	3-oxoacyl-[acyl-carrier-protein] reductase
			139	0.03842	0.5833	fp1864	N/A	-9.26	0.078951	9 -- 18	2 -- 11	Glycosyl transferase group 1 family protein
			86	0.02869	0.5833	fp1848	N/A	-9.22	0.080192	1 -- 8	1 -- 8
			87	0.02879	0.5833	fp1753	def	-9.2	0.081138	175 -- 181	1 -- 7	Peptide deformylase
			33	0.01272	0.5833	fp1626	tilS	-9.19	0.081355	259 -- 281	92 -- 120	tRNA(Ile)-lysidine synthase
			167	0.04673	0.5833	fp2243	recX	-9.19	0.081453	224 -- 242	117 -- 132	Regulatory protein RecX
			43	0.01818	0.5833	fp2073	N/A	-9.1	0.084847	207 -- 220	118 -- 132	Protein of unknown function precursor
			77	0.02626	0.5833	fp0544	N/A	-9.06	0.086354	107 -- 117	1 -- 11	Membrane protein TerC family possibly involved in tellurium resistance
			115	0.03412	0.5833	fp0637	N/A	-9	0.088822	224 -- 254	99 -- 129	Probable lipoprotein precursor
			71	0.02447	0.5833	fp1041	pheT	-8.99	0.089118	173 -- 182	2 -- 11	Phenylalanine--tRNA ligase beta subunit
			171	0.04711	0.5833	fp0640	serC	-8.99	0.089246	264 -- 288	53 -- 75	Phosphoserine transaminase
			196	0.05289	0.5833	fp2102	N/A	-8.94	0.09105	39 -- 47	1 -- 9
			134	0.03758	0.5833	fp1952	N/A	-8.87	0.093837	13 -- 27	1 -- 16
			36	0.01295	0.5833	fp0481	N/A	-8.81	0.09653	139 -- 149	1 -- 11	Putative monofunctional lysine-ketoglutarate reductase
			108	0.03271	0.5833	fp2513	N/A	-8.74	0.09976	28 -- 50	52 -- 76	Protein of unknown function precursor; putative adhesin	fp2519
			37	0.01312	0.5833	fp1649	N/A	-8.71	0.101065	229 -- 246	97 -- 114
			176	0.04793	0.5833	fp0654	coaD	-8.58	0.106889	6 -- 25	98 -- 118	Pantetheine-phosphate adenylyltransferase
			165	0.04597	0.5833	fp1788	N/A	-8.5	0.110933	138 -- 150	1 -- 13
			41	0.015	0.5833	fp0892	rplT	-8.46	0.112651	80 -- 96	104 -- 119	50S ribosomal protein L20
			150	0.04112	0.5833	fp0718	N/A	-8.45	0.113313	171 -- 181	2 -- 12
			160	0.04449	0.5833	fp1979	miaB	-8.45	0.113365	12 -- 22	123 -- 133	Probable TRNA-i(6)A37 modification enzyme MiaB
			88	0.02881	0.5833	fp0152	N/A	-8.45	0.113564	163 -- 177	7 -- 21
			26	0.01106	0.5833	fp1081	phoH	-8.42	0.114635	75 -- 98	110 -- 132	Phosphate starvation-inducible protein PhoH
			136	0.03771	0.5833	fp0014	sprC	-8.42	0.114771	33 -- 54	108 -- 132	Putative adhesin precursor SprC
			105	0.03205	0.5833	fp1201	lipB	-8.38	0.117002	231 -- 241	97 -- 107	Lipoyl(octanoyl) transferase
			155	0.04259	0.5833	fp0229	N/A	-8.38	0.117058	161 -- 179	91 -- 109	Probable M23/M37 family peptidase
			170	0.04703	0.5833	fp0045	N/A	-8.32	0.11988	111 -- 127	113 -- 134	Probable transcriptional regulator AraC family
			68	0.02299	0.5833	fp1449	crtI	-8.24	0.124208	222 -- 252	100 -- 134	Phytoene dehydrogenase
			154	0.04187	0.5833	fp1975	topA	-8.23	0.1251	49 -- 65	115 -- 130	DNA topoisomerase I
			29	0.0116	0.5833	fp2586	N/A	-8.22	0.125638	44 -- 73	99 -- 127	Probable transposase
			197	0.05301	0.5833	fp1840	N/A	-8.19	0.127325	147 -- 171	110 -- 133	Protein of unknown function precursor
			145	0.03946	0.5833	fp0694	N/A	-8.17	0.128405	57 -- 67	1 -- 11	Protein of unknown function related to microcin resistance protein McbG
			69	0.02325	0.5833	fp1839	coaBC	-8.15	0.129627	98 -- 115	54 -- 71	Bifunctional protein CoaBC : Phosphopantothenoylcysteine decarboxylase and Phosphopantothenate--cysteine ligase
			177	0.04796	0.5833	fp0199	purN	-8.15	0.12963	175 -- 181	1 -- 7	Phosphoribosylglycinamide formyltransferase
			70	0.02397	0.5833	fp1352	radC	-8.14	0.130013	137 -- 150	1 -- 13	DNA repair protein RadC
			17	0.00657	0.5833	fp0692	N/A	-8.12	0.131183	159 -- 182	52 -- 75
			102	0.03157	0.5833	fp0412	aspC1	-8.11	0.131956	161 -- 175	1 -- 15	Probable aspartate transaminase AspC1
			143	0.03915	0.5833	fp1687	N/A	-8.08	0.133567	241 -- 249	1 -- 9	Probable two-component system sensor histidine kinase
			141	0.03879	0.5833	fp1298	wzc	-8.07	0.133968	31 -- 66	109 -- 133	Probable tyrosine-protein kinase involved in exopolysaccharide biosynthesis Wzc
			104	0.03198	0.5833	fp1862	N/A	-8.07	0.134177	165 -- 187	113 -- 132	Glycosyl transferase group 2 family protein
			183	0.04919	0.5833	fp0399	sppA	-8.03	0.13683	118 -- 127	1 -- 11	Protease IV (signal peptide peptidase)
			195	0.05259	0.5833	fp1452	N/A	-8.02	0.137044	236 -- 265	93 -- 123	Probable lipoprotein precursor
			72	0.02448	0.5833	fp0527	gyrB	-7.99	0.138852	153 -- 164	2 -- 13	DNA gyrase B subunit
			133	0.03752	0.5833	fp1474	N/A	-7.93	0.143012	249 -- 269	103 -- 122	Putative acetyltransferase GNAT family
			28	0.0115	0.5833	fp1142	N/A	-7.91	0.144311	249 -- 255	1 -- 7	Probable outer membrane protein precursor
			50	0.01971	0.5833	fp0515	N/A	-7.89	0.14537	217 -- 241	110 -- 132	Nitroreductase
			147	0.04076	0.5833	fp2299	gspD	-7.8	0.151428	170 -- 181	1 -- 11	Putative bacterial general secretion pathway protein D precursor
			199	0.05308	0.5833	fp0884	sdaA	-7.78	0.152777	171 -- 181	2 -- 12	L-serine ammonia-lyase
			98	0.03118	0.5833	fp1293	rmlA	-7.76	0.153537	103 -- 112	109 -- 119	Glucose-1-phosphate thymidylyltransferase
			163	0.04546	0.5833	fp2413	claF	-7.75	0.154296	150 -- 162	1 -- 14	Protein of unknown function precursor; putative adhesin	fp0595
			129	0.03672	0.5833	fp1830	N/A	-7.71	0.157106	162 -- 177	1 -- 17	Protein of unknown function precursor; putative adhesin
			117	0.03434	0.5833	fp1842	N/A	-7.62	0.163497	274 -- 289	115 -- 132
			48	0.01949	0.5833	fp0363	pstA	-7.61	0.164227	241 -- 256	58 -- 72	ABC-type phosphate-transport system permease component PstA	fp0362
			168	0.04691	0.5833	fp2217	rplU	-7.61	0.1645	157 -- 169	2 -- 14	50S ribosomal protein L21
			137	0.0378	0.5833	fp1460	bluB/cobT	-7.6	0.165189	71 -- 90	117 -- 132	Bifunctional protein : cob(II)yrinic acid a c-diamide reductase and nicotinate-nucleotide--dimethylbenzimidazole phosphoribosyltransferase
			89	0.02886	0.5833	fp0668	natB	-7.58	0.166519	100 -- 128	103 -- 127	Probable ABC-type Na(+)-transporting system permease component
			114	0.03382	0.5833	fp0145	pgi	-7.53	0.170325	23 -- 34	95 -- 107	Glucose-6-phosphate isomerase
			53	0.02008	0.5833	fp2009	fmt	-7.52	0.170507	27 -- 39	60 -- 72	Methionyl-tRNA formyltransferase
			135	0.03759	0.5833	fp1150	N/A	-7.47	0.174607	286 -- 296	117 -- 127	Probable transmembrane protein of unknown function
			156	0.04293	0.5833	fp1270	N/A	-7.34	0.184615	29 -- 36	1 -- 8	Probable ABC-type polysaccharide/polyol phosphate transport system permease component
			3	0.0002116	0.1145	fp1806	npdA	-7.31	0.18691	30 -- 50	53 -- 75	NAD-dependent deacetylase
			172	0.04775	0.5833	fp1206	acdS	-7.27	0.19026	230 -- 265	93 -- 128	1-aminocyclopropane-1-carboxylate deaminase
			103	0.03192	0.5833	fp0610	tgt	-7.26	0.191206	188 -- 197	2 -- 11	Queuine tRNA-ribosyltransferase
			15	0.005595	0.5833	fp0255	N/A	-7.24	0.193265	164 -- 177	121 -- 134	Homoserine dehydrogenase
			127	0.03589	0.5833	fp1317	rpmJ	-7.21	0.195217	280 -- 299	57 -- 75	50S ribosomal protein L36
			149	0.041	0.5833	fp2453	N/A	-7.19	0.197508	74 -- 85	60 -- 71	Major facilitator superfamily (MFS) permease
			182	0.04916	0.5833	fp2333	N/A	-7.13	0.202054	236 -- 269	104 -- 133	Probable S41A family C-terminal processing peptidase precursor
			56	0.02078	0.5833	fp2377	accC	-7.1	0.204898	220 -- 236	92 -- 108	acetyl-CoA carboxylase biotin carboxylase subunit
			80	0.02675	0.5833	fp1461	cobU	-7.05	0.209698	237 -- 274	95 -- 132	Bifunctional protein cobU : adenosylcobinamide kinase and adenosylcobinamide-phosphate guanylyltransferase
			20	0.008284	0.5833	fp2101	N/A	-7.04	0.210695	221 -- 234	116 -- 129	Protein of unknown function precursor
			116	0.03424	0.5833	fp0248	rsgA	-6.91	0.222339	187 -- 197	57 -- 67	Putative ribosome biogenesis GTPase RsgA
			146	0.03978	0.5833	fp0611	N/A	-6.86	0.227033	237 -- 247	102 -- 112	Probable lipopolysaccharide export system permease protein lptF/lptG family
			180	0.04912	0.5833	fp0919	N/A	-6.82	0.231219	2 -- 40	95 -- 127	Cytochrome c oxidase family protein
			59	0.02125	0.5833	fp0624	N/A	-6.78	0.234547	172 -- 181	3 -- 12	Probable phosphatase/phosphohexomutase
			64	0.02179	0.5833	fp0656	N/A	-6.76	0.237332	76 -- 91	110 -- 123
			109	0.03274	0.5833	fp0761	N/A	-6.66	0.246787	40 -- 49	123 -- 132	acyltransferase
			122	0.03542	0.5833	fp0408	fabD	-6.63	0.249924	124 -- 131	1 -- 8	Malonyl CoA-acyl carrier protein transacylase
			95	0.03059	0.5833	fp1953	N/A	-6.61	0.251754	4 -- 14	1 -- 11
			66	0.0222	0.5833	fp2086	tig	-6.6	0.252975	78 -- 88	120 -- 130	Trigger factor (TF)
			161	0.04494	0.5833	fp1029	N/A	-6.6	0.253268	37 -- 48	113 -- 126	Probable oxidoreductase
			4	0.0002127	0.1145	fp0632	N/A	-6.58	0.255454	262 -- 269	1 -- 8	Probable ABC-type transport system ATPase component
			24	0.009866	0.5833	fp0842	N/A	-6.57	0.256295	90 -- 107	114 -- 130	Probable M14 family peptidase
			46	0.01936	0.5833	fp1138	N/A	-6.55	0.258488	90 -- 107	93 -- 110	Phosphoglucomutase/phosphomannomutase family protein
			62	0.02151	0.5833	fp2531	N/A	-6.46	0.268981	194 -- 229	95 -- 120	Probable transposase
			184	0.04955	0.5833	fp1664	ssb	-6.45	0.270065	33 -- 40	1 -- 8	Single-strand DNA-binding protein Ssb
			124	0.03568	0.5833	fp1793	rpsA	-6.43	0.272345	223 -- 238	118 -- 132	30S ribosomal protein S1
			159	0.04431	0.5833	fp0569	norM	-6.38	0.277479	172 -- 180	3 -- 11	Multidrug resistance protein norM (Na(+)/drug antiporter)
			151	0.04133	0.5833	fp0867	N/A	-6.29	0.288058	144 -- 151	2 -- 9	Probable transmembrane protein of unknown function
			144	0.03928	0.5833	fp0459	N/A	-6.12	0.308697	178 -- 186	3 -- 11
			74	0.02516	0.5833	fp1710	N/A	-6.12	0.309237	73 -- 83	113 -- 127	Hypothetical protein
			81	0.02694	0.5833	fp2170	N/A	-6.06	0.316772	60 -- 69	109 -- 118
			99	0.03122	0.5833	fp1613	gapA3	-6	0.323883	289 -- 298	99 -- 108	Glyceraldehyde-3-phosphate dehydrogenase (phosphorylating)
			31	0.01267	0.5833	fp2246	N/A	-5.93	0.332714	44 -- 92	62 -- 110	Probable acyltransferase
			97	0.03083	0.5833	fp1429	tpiA	-5.92	0.334841	190 -- 200	111 -- 120	Triose-phosphate isomerase
			96	0.0308	0.5833	fp0163	N/A	-5.88	0.340202	207 -- 224	115 -- 132	Probable lipoprotein precursor
			194	0.05247	0.5833	fp1015	N/A	-5.88	0.340367	38 -- 44	2 -- 8	Probable two-component system response regulatory protein
			175	0.04781	0.5833	fp1856	nadC	-5.84	0.345307	172 -- 184	116 -- 129	Nicotinate-nucleotide diphosphorylase (carboxylating)
			22	0.009565	0.5833	fp2138	N/A	-5.51	0.392835	9 -- 21	116 -- 128	Protein of unknown function precursor
			2	0	0	fp2023	hemK	-5.28	0.42795	227 -- 234	1 -- 8	Methylase of polypeptide chain release factors
			75	0.02534	0.5833	fp0585	N/A	-4.95	0.482493	52 -- 59	27 -- 34
			178	0.04857	0.5833	fp1308	gltA	-4.62	0.538906	114 -- 128	51 -- 64	Citrate (Si)-synthase
			55	0.02072	0.5833	fp1807	N/A	-3.86	0.678596	219 -- 260	96 -- 122	Probable tRNA/rRNA methyltransferase
			198	0.05302	0.5833	fp2248	N/A	-3.6	0.726184	81 -- 89	5 -- 13	Probable 6-pyruvoyltetrahydrobiopterin synthase
			148	0.04078	0.5833	fp1484	apbE	-3.13	0.807799	229 -- 245	52 -- 75	Membrane-associated protein involved in thiamine biosynthesis
			121	0.03516	0.5833	fp0538	N/A	-3.06	0.8184	71 -- 85	117 -- 131	Probable ABC-type transport system binding protein precursor component

## Sheet: Rfp74
Locustag=THC0290_N_1134			OUTPUT
Name=Rfp74
INPUT_sequence	Genome_blastn_eval		Rank	CopraRNA p-value	CopraRNA fdr value	Locus Tag	Gene Name	Energy [kcal/mol]	IntaRNA p-value	Position mRNA	Position sRNA	Annotation	Additional homologs
>NC_009441	Flavobacterium johnsoniae UW101 strain=UW101; ATCC 17061 eval=0.010		3	0.000695	0.4088	fp1558	N/A	-19.4	0.000884	128 -- 161	17 -- 50	Hypothetical protein
TAATAAAATACAACACCAATATTTTTTGCCTGAAAGTTATCTTTAAATTAAATAATAAA			6	0.001836	0.4428	fp0374	actC	-17.3	0.002249	3 -- 55	4 -- 56	Alternative complex III protein C
>NC_009613	Flavobacterium psychrophilum JIP02/86 strain=JIP02/86 eval=4.35e-22		8	0.002022	0.4428	fp1637	wbhW	-17.1	0.002468	1 -- 48	3 -- 50	Protein of unknown function WbhW
AAGTCTAATAAAATACTATATTTGAAATTTTTTGACTGTAATTTAACTTTATTTTTAACCAATAAACACA			15	0.003469	0.4428	fp0310	mvaD	-15.97	0.004145	229 -- 273	14 -- 55	Diphosphomevalonate decarboxylase
>NZ_CP007627	Flavobacterium psychrophilum strain=CSF259-93 eval=4.35e-22		23	0.00474	0.4428	fp1800	N/A	-15.83	0.004411	93 -- 133	8 -- 57
AAGTCTAATAAAATACTATATTTGAAATTTTTTGACTGTAATTTAACTTTATTTTTAACCAATAAACACA			17	0.003929	0.4428	fp0689	N/A	-15.71	0.004672	110 -- 171	3 -- 69	Protein of unknown function precursor
>NZ_CP008902	Flavobacterium psychrophilum strain=950106-1/1 eval=4.35e-22		16	0.003871	0.4428	fp1840	N/A	-15.57	0.004975	97 -- 134	16 -- 54	Protein of unknown function precursor
AAGTCTAATAAAATACTATATTTGAAATTTTTTGACTGTAATTTAACTTTATTTTTAACCAATAAACACA			28	0.006072	0.4853	fp1063	tdk	-14.81	0.007099	238 -- 267	32 -- 62	Thymidine kinase
>NZ_CP015107	Flavobacterium columnare strain=C#2 eval=0.004		29	0.006098	0.4853	fp1165	yueD	-14.8	0.007129	225 -- 264	1 -- 60	Benzil reductase YueD
TAAAAAAATATTATATTTTAATTTTTTTGATATATGTGATAGAAAATTAAATTTATTACCTATAAA			26	0.004988	0.4428	fp1920	N/A	-14.42	0.008518	26 -- 72	21 -- 63	Probable outer membrane protein precursor OmpA family
			33	0.007506	0.4951	fp0228	N/A	-14.38	0.008703	45 -- 89	19 -- 69	Tryptophan 2 3-dioxygenase
Sequence alignment was produced using Multalin tool using default parameters (http://multalin.toulouse.inra.fr/multalin/multalin.html).			5	0.00119	0.4428	fp2055	ftsQ	-14.37	0.008724	50 -- 70	42 -- 61	Cell division protein FtsQ
			35	0.007807	0.4951	fp2200	ygcF	-14.3	0.009038	220 -- 236	28 -- 44	Protein of unknown function YgcF
			37	0.008005	0.4951	fp2249	rpoN	-14.25	0.009259	203 -- 228	20 -- 47	RNA polymerase sigma-54 factor RpoN
			50	0.01174	0.5048	fp1447	crtY	-14.21	0.009415	182 -- 214	14 -- 47	Lycopene cyclase
			42	0.009619	0.5048	fp1584	N/A	-13.87	0.011047	53 -- 71	49 -- 69	Hypothetical protein
			43	0.009801	0.5048	fp2257	N/A	-13.84	0.011248	179 -- 224	17 -- 55	Glycosyl transferase group 2 family protein
			45	0.01075	0.5048	fp1247	N/A	-13.54	0.012969	39 -- 76	30 -- 70	Glycosyl transferase group 1 family protein
			55	0.01325	0.5048	fp1270	N/A	-13.23	0.015031	4 -- 46	26 -- 59	Probable ABC-type polysaccharide/polyol phosphate transport system permease component
			58	0.01349	0.5048	fp0095	sdhB	-13.19	0.015293	175 -- 227	17 -- 70	Succinate dehydrogenase iron-sulfur protein
			59	0.01381	0.5048	fp1380	N/A	-13.15	0.015637	132 -- 155	41 -- 63
The use of three sRNA homologs with some degree of divergence is mandatory for CopraRNA tool.			60	0.0139	0.5048	fp0004	N/A	-13.13	0.015744	169 -- 203	19 -- 58	Probable SAM-dependent methyltransferase
If this criteria is true, the list of putative sRNA targets is ranked based on CopraRNA p-value. If not, the list is ranked based on IntaRNA p-value.			64	0.01443	0.5048	fp0250	aspC3	-13.06	0.016313	215 -- 240	27 -- 54	Probable aspartate transaminase AspC3
			2	0.0005218	0.4088	fp1387	porV	-13.05	0.016413	176 -- 227	2 -- 47	Por secretion system protein porV precursor
			65	0.0146	0.5048	fp0639	serA	-13.04	0.016505	108 -- 159	2 -- 64	Phosphoglycerate dehydrogenase
			66	0.01488	0.5048	fp2210	exbB	-13	0.016803	89 -- 123	2 -- 35	Biopolymer transport ExbB protein
			73	0.01597	0.5048	fp0405	porR	-12.86	0.017984	242 -- 288	19 -- 56	PorR protein probably involved in biosynthesis of cell surface polysaccharide
			22	0.004665	0.4428	fp2456	N/A	-12.85	0.018073	150 -- 189	17 -- 57	Probable TonB-dependent outer membrane ferrichrome-iron receptor precursor
			4	0.0007085	0.4088	fp2128	N/A	-12.81	0.018391	27 -- 66	17 -- 57
			10	0.002382	0.4428	fp0528	mdh	-12.79	0.018615	260 -- 296	3 -- 41	Malate dehydrogenase
			75	0.01672	0.5068	fp1228	mscS3	-12.77	0.018798	144 -- 165	49 -- 70	Probable small-conductance mechanosensitive ion channel MscS3
			78	0.01746	0.5068	fp2014	murA	-12.68	0.019601	122 -- 147	19 -- 44	UDP-N-acetylglucosamine 1-carboxyvinyltransferase
			79	0.01774	0.5068	fp1937	N/A	-12.65	0.019899	6 -- 42	3 -- 39	Protein of unknown function precursor
			82	0.01801	0.5068	fp2493	folB	-12.62	0.020188	247 -- 297	16 -- 67	Dihydroneopterin aldolase
			48	0.01127	0.5048	fp2211	N/A	-12.46	0.02182	202 -- 224	21 -- 45
			86	0.02001	0.5121	fp1635	N/A	-12.41	0.022346	151 -- 194	2 -- 50	Probable transmembrane protein of unknown function
			14	0.003357	0.4428	fp0086	pepO	-12.32	0.023369	149 -- 177	14 -- 44	M13 family metallopeptidase PepO precursor
			90	0.02103	0.5121	fp0115	atpC	-12.31	0.023444	190 -- 219	13 -- 43	ATP synthase epsilon subunit
			95	0.02199	0.5121	fp0328	dfrA	-12.22	0.024463	156 -- 193	19 -- 56	Dihydrofolate reductase
			98	0.02267	0.5121	fp1876	N/A	-12.16	0.025198	48 -- 92	14 -- 56
			99	0.02278	0.5121	fp1593	dgkA	-12.15	0.025308	45 -- 75	14 -- 44	Diacylglycerol kinase
			100	0.02287	0.5121	fp0945	N/A	-12.14	0.025411	70 -- 120	14 -- 60	Probable ATP-dependent RNA helicase DEAD/DEAH box family
			104	0.02356	0.5121	fp0042	hemD	-12.09	0.026142	72 -- 124	2 -- 56	Uroporphyrinogen-III synthase
			105	0.02366	0.5121	fp1650	N/A	-12.08	0.026249	232 -- 249	16 -- 33
			106	0.0237	0.5121	fp0032	N/A	-12.07	0.026293	85 -- 114	37 -- 67
			38	0.008162	0.4951	fp1730	katG	-12.05	0.026628	164 -- 200	12 -- 62	Bi-functional catalase-peroxidase
			51	0.01197	0.5048	fp0112	N/A	-11.99	0.027337	96 -- 118	44 -- 65	Probable TonB-dependent outer membrane receptor precursor
			41	0.009067	0.5048	fp0072	serS	-11.96	0.027758	145 -- 224	4 -- 68	Serine--tRNA ligase
			111	0.02549	0.5121	fp0633	mrsA	-11.93	0.028206	172 -- 211	27 -- 62	Peptide methionine sulfoxide reductase MsrA
			112	0.02551	0.5121	fp2391	sufD	-11.93	0.02822	174 -- 195	43 -- 63	Fe-S assembly protein SufD
			113	0.02557	0.5121	fp0379	ctaD	-11.91	0.028484	15 -- 43	17 -- 63	Cytochrome c oxidase subunit I
			114	0.02624	0.5121	fp2284	fabB	-11.87	0.028998	132 -- 157	31 -- 56	3-oxoacyl-(acyl-carrier-protein) synthase I
			119	0.02721	0.5121	fp1839	coaBC	-11.8	0.030034	143 -- 177	6 -- 39	Bifunctional protein CoaBC : Phosphopantothenoylcysteine decarboxylase and Phosphopantothenate--cysteine ligase
			121	0.02753	0.5121	fp2276	N/A	-11.78	0.03037	46 -- 74	13 -- 40
			52	0.0126	0.5048	fp1827	rprX	-11.75	0.030756	5 -- 49	14 -- 60	Two-component system sensor histidine kinase RprX
			125	0.02877	0.5121	fp1338	rplD	-11.69	0.031688	77 -- 125	15 -- 61	50S ribosomal protein L4
			69	0.01543	0.5048	fp1766	N/A	-11.68	0.031862	239 -- 265	28 -- 57
			39	0.008495	0.4951	fp0209	ruvC	-11.67	0.032098	46 -- 82	32 -- 69	Crossover junction endoribonuclease
			126	0.0294	0.5121	fp0205	N/A	-11.65	0.032353	251 -- 272	30 -- 53
			127	0.02964	0.5121	fp2486	czcD	-11.63	0.032612	257 -- 272	14 -- 29	Cation efflux system protein CzcD
			128	0.02988	0.5121	fp1983	secG	-11.62	0.03286	145 -- 167	17 -- 41	Preprotein translocase SecG subunit
			129	0.03004	0.5121	fp0994	N/A	-11.61	0.033036	20 -- 45	17 -- 41	Probable transcriptional regulator AraC family
			36	0.007833	0.4951	fp1648	N/A	-11.55	0.033959	126 -- 197	13 -- 63
			133	0.03104	0.5121	fp2132	yitI	-11.54	0.034089	206 -- 228	28 -- 51	Acetyltransferase GNAT family YitI
			137	0.03221	0.5121	fp0634	folE1	-11.47	0.035324	163 -- 208	13 -- 59	GTP cyclohydrolase I
			138	0.03229	0.5121	fp1315	rpsK	-11.46	0.035405	222 -- 246	32 -- 56	30S ribosomal protein S11
			116	0.02664	0.5121	fp2261	N/A	-11.46	0.035437	57 -- 102	12 -- 49
			140	0.03266	0.5121	fp0251	pheA	-11.44	0.035799	202 -- 238	27 -- 61	Prephenate dehydratase
			141	0.03323	0.5121	fp2332	surE	-11.41	0.036402	27 -- 67	14 -- 52	5'-nucleotidase SurE
			89	0.0208	0.5121	fp1135	rpmE	-11.38	0.036853	204 -- 251	3 -- 56	50S ribosomal protein L31
			145	0.03376	0.5121	fp1361	N/A	-11.38	0.036965	150 -- 178	4 -- 34
			151	0.03524	0.5121	fp1102	N/A	-11.29	0.038516	252 -- 297	13 -- 60
			7	0.001951	0.4428	fp2283	N/A	-11.29	0.038577	187 -- 229	27 -- 67
			156	0.03658	0.5121	fp1570	N/A	-11.22	0.039924	163 -- 181	21 -- 38
			159	0.03703	0.5121	fp1012	N/A	-11.19	0.040512	198 -- 227	30 -- 55
			163	0.0375	0.5121	fp1335	rpsS	-11.13	0.041806	260 -- 300	1 -- 50	30S ribosomal protein S19
			171	0.03911	0.5121	fp0608	N/A	-11.09	0.042578	158 -- 200	13 -- 44	Probable superoxide dismutase
			178	0.04026	0.5121	fp0088	N/A	-11.07	0.042902	135 -- 161	45 -- 70	Probable cytochrome c oxidase biogenesis protein
			21	0.004572	0.4428	fp0478	menB	-11.06	0.043109	207 -- 245	17 -- 55	1 4-dihydroxy-2-naphthoyl-CoA synthase
			177	0.04025	0.5121	fp2353	N/A	-11.03	0.043776	158 -- 195	19 -- 65	Probable membrane-associated esterase
			92	0.02128	0.5121	fp0009	N/A	-11.01	0.044234	147 -- 159	55 -- 67	Probable cAMP-binding protein
			102	0.02337	0.5121	fp1221	N/A	-11	0.044415	89 -- 109	16 -- 39
			185	0.0413	0.5121	fp1904	N/A	-10.98	0.044873	114 -- 132	6 -- 25	Putative muramidase precursor
			179	0.0405	0.5121	fp2134	N/A	-10.97	0.04503	19 -- 59	17 -- 60
			107	0.02398	0.5121	fp2174	N/A	-10.96	0.045299	6 -- 37	30 -- 61
			61	0.01401	0.5048	fp2082	N/A	-10.93	0.045935	261 -- 294	6 -- 35	Probable membrane-associated phospholipid phosphatase
			191	0.04263	0.5121	fp0609	N/A	-10.92	0.046266	180 -- 230	11 -- 60
			193	0.0431	0.5121	fp2274	hpaIIM	-10.9	0.046762	197 -- 227	12 -- 46	Type II modification methyltransferase HpaII	fp2150
			11	0.002564	0.4428	fp0329	N/A	-10.86	0.047536	3 -- 31	3 -- 35	Probable transmembrane protein
			167	0.03781	0.5121	fp1987	rpmH	-10.84	0.047996	47 -- 81	14 -- 53	50S ribosomal protein L34
			109	0.02482	0.5121	fp0422	N/A	-10.78	0.049601	112 -- 144	26 -- 58	Probable ABC-type transport system ATPase and permease components
			63	0.01442	0.5048	fp0121	N/A	-10.76	0.050135	28 -- 49	48 -- 69	Putative outer membrane protein precursor
			96	0.02223	0.5121	fp1495	N/A	-10.7	0.051584	202 -- 216	47 -- 61	Probable TonB-dependent outer membrane receptor precursor
			12	0.002696	0.4428	fp1181	nusG	-10.65	0.052754	242 -- 269	42 -- 68	Transcription antitermination protein NusG
			68	0.01539	0.5048	fp1465	N/A	-10.62	0.053702	53 -- 84	39 -- 68	Glycosyl transferase group 2 family protein
			160	0.03722	0.5121	fp1089	gldF	-10.58	0.054568	40 -- 60	16 -- 38	Gliding motility transmembrane protein GldF
			27	0.005277	0.4511	fp1938	N/A	-10.58	0.054659	22 -- 47	25 -- 50	Putative plasmid stabilization system protein
			187	0.04206	0.5121	fp1863	N/A	-10.52	0.056297	164 -- 227	1 -- 64
			77	0.01726	0.5068	fp1596	N/A	-10.47	0.057624	265 -- 277	27 -- 39
			153	0.03556	0.5121	fp1400	proS	-10.45	0.058283	222 -- 248	13 -- 39	Proline--tRNA ligase
			181	0.04053	0.5121	fp1499	N/A	-10.38	0.060347	24 -- 72	24 -- 63	Protein of unknown function precursor; putative adhesin	fp0595
			196	0.04349	0.5121	fp1905	N/A	-10.3	0.062645	109 -- 170	3 -- 60
			143	0.03362	0.5121	fp2205	N/A	-10.27	0.063552	27 -- 48	38 -- 56	Protein of unknown function precursor
			149	0.03482	0.5121	fp0843	N/A	-10.24	0.064625	30 -- 64	19 -- 57	Probable transcriptional regulator AsnC family
			198	0.04443	0.5179	fp1873	rplS	-10.24	0.064749	69 -- 90	22 -- 41	50S ribosomal protein L19
			134	0.03146	0.5121	fp2159	N/A	-10.21	0.065745	139 -- 208	4 -- 66
			54	0.01321	0.5048	fp2308	N/A	-10.19	0.066236	25 -- 58	20 -- 56	Protein of unknown function precursor
			165	0.03756	0.5121	fp2308	N/A	-10.19	0.066236	25 -- 58	20 -- 56	Protein of unknown function precursor
			184	0.0412	0.5121	fp0200	acpP	-10.17	0.066796	143 -- 209	3 -- 61	Acyl carrier protein
			110	0.02502	0.5121	fp1571	N/A	-10.15	0.067407	50 -- 81	19 -- 50		fp2295 fp1538
			71	0.01559	0.5048	fp1019	N/A	-10.1	0.069374	15 -- 84	4 -- 64	Probable two-component system sensor histidine kinase	fp1017
			176	0.03996	0.5121	fp2317	N/A	-10.04	0.071422	52 -- 67	48 -- 63
			148	0.03438	0.5121	fp1359	adk	-9.95	0.074459	76 -- 128	16 -- 67	Adenylate kinase
			9	0.002058	0.4428	fp2054	ftsA	-9.9	0.076559	202 -- 243	16 -- 57	Cell division protein FtsA
			56	0.0134	0.5048	fp0396	N/A	-9.89	0.076808	97 -- 134	19 -- 45	Protein of unknown function precursor
			24	0.004836	0.4428	fp0908	sucC	-9.87	0.077376	76 -- 114	19 -- 56	Succinyl-CoA synthetase beta subunit
			32	0.006817	0.4917	fp0526	N/A	-9.83	0.079189	36 -- 62	17 -- 44	Probable asparagine synthetase [glutamine-hydrolyzing]
			108	0.02454	0.5121	fp1561	N/A	-9.82	0.079536	186 -- 226	21 -- 54
			131	0.03042	0.5121	fp0530	csaA	-9.77	0.081326	11 -- 47	23 -- 60	Protein secretion chaperone CsaA
			74	0.01641	0.5068	fp1740	N/A	-9.72	0.083645	96 -- 144	1 -- 67
			166	0.03769	0.5121	fp2002	N/A	-9.67	0.085425	18 -- 52	1 -- 35
			132	0.03086	0.5121	fp0016	sprB	-9.63	0.08706	56 -- 87	27 -- 61	Putative adhesin precursor SprB
			150	0.03497	0.5121	fp0194	N/A	-9.62	0.087789	152 -- 168	11 -- 27	Hypothetical protein
			81	0.01792	0.5068	fp1745	N/A	-9.54	0.091367	3 -- 49	21 -- 50	Putative dinucleotide-utilizing enzyme involved in molybdopterin and thiamine biosynthesis
			13	0.002987	0.4428	fp0008	N/A	-9.52	0.091959	44 -- 81	21 -- 58
			147	0.03421	0.5121	fp0951	N/A	-9.52	0.09198	154 -- 172	44 -- 60	MutT/nudix family protein
			101	0.0232	0.5121	fp1192	N/A	-9.41	0.097422	192 -- 224	7 -- 41	Probable transmembrane protein of unknown function
			197	0.04376	0.5127	fp1188	N/A	-9.4	0.09767	263 -- 292	23 -- 56
			123	0.02798	0.5121	fp1679	clpS	-9.22	0.106955	170 -- 213	16 -- 58	ATP-dependent Clp protease adaptor protein ClpS
			142	0.03346	0.5121	fp1592	ftsK	-9.21	0.10704	20 -- 42	18 -- 39	DNA translocase FtsK
			20	0.004441	0.4428	fp0744	N/A	-9.18	0.10891	220 -- 258	22 -- 60	Probable metalloprotease
			174	0.03945	0.5121	fp0977	lpxC/fabZ	-9.09	0.113947	183 -- 209	31 -- 56	Bifunctional enzyme : UDP-3-O-[3-hydroxymyristoyl] N-acetylglucosamine deacetylase and (3R)-hydroxymyristoyl-[acyl carrier protein] dehydratase
			117	0.02671	0.5121	fp2225	nuoG	-9.05	0.115716	137 -- 160	21 -- 44	NADH dehydrogenase I G subunit N-terminal region
			94	0.02186	0.5121	fp1339	rplC	-8.92	0.123527	70 -- 87	42 -- 60	50S ribosomal protein L3
			154	0.036	0.5121	fp0611	N/A	-8.89	0.125663	99 -- 110	50 -- 61	Probable lipopolysaccharide export system permease protein lptF/lptG family
			83	0.01902	0.5121	fp2064	mraW	-8.87	0.126423	213 -- 232	18 -- 39	S-adenosyl-methyltransferase MraW
			189	0.04255	0.5121	fp2265	N/A	-8.87	0.126554	24 -- 73	3 -- 65	3-oxoacyl-(acyl-carrier-protein) synthase
			199	0.04471	0.5186	fp0446	ilvC	-8.81	0.13064	156 -- 175	19 -- 39	Ketol-acid reductoisomerase
			46	0.01077	0.5048	fp1141	N/A	-8.72	0.13607	3 -- 43	27 -- 67	Probable lipoprotein precursor
			76	0.01719	0.5068	fp1256	neuB	-8.7	0.137319	217 -- 233	28 -- 44	Sialic acid synthase (N-acetylneuraminic acid synthetase)
			180	0.04053	0.5121	fp1332	rplP	-8.67	0.139289	13 -- 36	45 -- 69	50S ribosomal protein L16
			87	0.02016	0.5121	fp0940	N/A	-8.65	0.140716	32 -- 66	20 -- 56	Putative capsular polysaccharide biosynthesis protein
			135	0.03203	0.5121	fp1298	wzc	-8.65	0.141095	1 -- 24	16 -- 39	Probable tyrosine-protein kinase involved in exopolysaccharide biosynthesis Wzc
			49	0.01155	0.5048	fp1330	rpsQ	-8.53	0.149149	202 -- 244	15 -- 61	30S ribosomal protein S17
			34	0.007721	0.4951	fp0525	N/A	-8.45	0.1555	239 -- 254	48 -- 63
			80	0.01775	0.5068	fp1804	N/A	-8.44	0.155623	80 -- 102	29 -- 56	Aminocarboxylic acid CoA-ligase
			53	0.01266	0.5048	fp2357	truB	-8.43	0.156998	87 -- 95	59 -- 67	tRNA pseudouridine synthase B
			120	0.02727	0.5121	fp1523	N/A	-8.42	0.157229	6 -- 28	48 -- 70	Two-component system response regulatory protein
			168	0.03812	0.5121	fp1870	N/A	-8.36	0.1623	159 -- 189	3 -- 37	Probable aminotransferase involved in lipopolysaccharide biosynthesis
			70	0.01544	0.5048	fp0982	N/A	-8.34	0.163532	27 -- 71	20 -- 54	Probable ATP-dependent exodeoxyribonuclease
			152	0.03527	0.5121	fp0618	N/A	-8.34	0.16372	104 -- 148	14 -- 60	Probable transmembrane protein of unknown function
			183	0.04116	0.5121	fp0054	N/A	-8.33	0.16482	110 -- 132	47 -- 68	Hydrolase haloacid dehalogenase family protein
			124	0.02799	0.5121	fp2446	N/A	-8.29	0.167472	243 -- 278	28 -- 64	Addiction module toxin Txe/YoeB family
			103	0.02343	0.5121	fp0517	N/A	-8.19	0.175874	42 -- 79	16 -- 56	Rhodanese-related sulfurtransferase
			40	0.008581	0.4951	fp1345	N/A	-8.18	0.176761	202 -- 217	42 -- 57	Probable outer membrane protein precursor Omp121 family
			144	0.03369	0.5121	fp1201	lipB	-8.18	0.176916	56 -- 95	27 -- 60	Lipoyl(octanoyl) transferase
			19	0.003962	0.4428	fp1220	N/A	-8.15	0.179085	225 -- 240	43 -- 59
			72	0.01578	0.5048	fp1334	rplV	-8.06	0.18718	183 -- 195	48 -- 60	50S ribosomal protein L22
			157	0.03675	0.5121	fp1711	nupG	-7.99	0.193957	267 -- 280	29 -- 42	Major facilitator superfamily (MFS) H+ Symporter (NHS) family nucleoside permease
			194	0.04321	0.5121	fp1613	gapA3	-7.86	0.206215	202 -- 253	12 -- 57	Glyceraldehyde-3-phosphate dehydrogenase (phosphorylating)
			85	0.01979	0.5121	fp1628	dapD	-7.59	0.234126	31 -- 72	20 -- 60	2 3 4 5-tetrahydropyridine-2 6-dicarboxylate N-succinyltransferase
			173	0.0394	0.5121	fp0213	N/A	-7.57	0.236041	154 -- 164	58 -- 69
			30	0.006745	0.4917	fp1516	N/A	-7.55	0.238192	197 -- 206	57 -- 66	Two-component system sensor histidine kinase
			31	0.006745	0.4917	fp1516	N/A	-7.55	0.238192	197 -- 206	57 -- 66	Two-component system sensor histidine kinase
			67	0.01528	0.5048	fp1516	N/A	-7.55	0.238192	197 -- 206	57 -- 66	Two-component system sensor histidine kinase
			139	0.03247	0.5121	fp1858	yjeB	-7.54	0.238873	17 -- 56	22 -- 60	Protein of unknown function YjeB
			190	0.04258	0.5121	fp0378	ctaC	-7.5	0.243265	208 -- 227	34 -- 67	Cytochrome c oxidase subunit II
			25	0.004851	0.4428	fp1198	N/A	-7.48	0.246109	6 -- 19	14 -- 27	Probable lipoprotein precursor	fp1346
			91	0.02111	0.5121	fp1349	N/A	-7.41	0.253717	2 -- 16	31 -- 45	Putative AAA family ATPase
			93	0.0217	0.5121	fp0622	N/A	-7.39	0.256519	32 -- 51	46 -- 63	Probable transmembrane protein of unknown function; putative anti ECF-type sigma factor
			162	0.03744	0.5121	fp0233	ribF	-7.32	0.265033	259 -- 299	26 -- 62	Bifunctional riboflavin biosynthesis protein RibF : Riboflavin kinase and FMN adenylyltransferase
			146	0.03399	0.5121	fp1973	gldK	-7.18	0.282112	282 -- 294	47 -- 59	Gliding motility lipoprotein precursor GldK
			164	0.03755	0.5121	fp1615	N/A	-7.17	0.283335	198 -- 249	17 -- 65	Protein of unknown function precursor
			130	0.03022	0.5121	fp0058	N/A	-7.05	0.29879	2 -- 18	42 -- 58	Putative carboxypeptidase
			192	0.04303	0.5121	fp0063	N/A	-7.05	0.29962	248 -- 256	16 -- 24	Putative hemolysin
			188	0.0422	0.5121	fp1377	N/A	-7.01	0.304793	184 -- 197	13 -- 26	Glycosyl transferase group 2 family protein
			122	0.02765	0.5121	fp0527	gyrB	-6.96	0.311276	13 -- 36	33 -- 58	DNA gyrase B subunit
			44	0.0104	0.5048	fp2136	N/A	-6.87	0.324199	209 -- 229	19 -- 39	Integrase/recombinase
			170	0.039	0.5121	fp1732	N/A	-6.73	0.344708	260 -- 280	33 -- 57	Probable amino acid-transporting permease
			47	0.01108	0.5048	fp0975	efp	-6.7	0.349148	160 -- 169	47 -- 56	Elongation factor P (EF-P)
			115	0.02649	0.5121	fp0651	N/A	-6.63	0.359968	136 -- 191	1 -- 60	Probable 23S rRNA pseudouridine synthase
			182	0.04096	0.5121	fp2426	N/A	-6.56	0.370895	128 -- 170	15 -- 60	Probable lipoprotein precursor
			88	0.02042	0.5121	fp2063	N/A	-6.52	0.377187	108 -- 153	19 -- 67	Probable transmembrane protein of unknown function
			84	0.01914	0.5121	fp1802	yghO	-6.43	0.392055	4 -- 33	27 -- 56	Protein of unknown function YghO
			175	0.03986	0.5121	fp0252	gldA	-6.43	0.392855	230 -- 258	19 -- 44	Gliding motility protein GldA
			200	0.04514	0.5188	fp1153	ccoI	-6.4	0.397071	182 -- 236	3 -- 60	Probable cytochrome cbb3 oxidase maturation protein CcoI
			169	0.03817	0.5121	fp0237	N/A	-6.37	0.401483	223 -- 241	25 -- 44	Probable lyase
			195	0.04329	0.5121	fp2245	recA	-6.21	0.429805	197 -- 224	21 -- 56	Recombinase A
			118	0.02701	0.5121	fp1472	deoD	-6.17	0.436601	261 -- 300	23 -- 56	Purine-nucleoside phosphorylase
			161	0.03742	0.5121	fp0683	tktC	-5.62	0.541012	134 -- 158	23 -- 46	Transketolase C-terminal subunit
			62	0.01426	0.5048	fp0111	glmS	-5.6	0.544452	221 -- 227	58 -- 64	Glucosamine--fructose-6-phosphate aminotransferase [isomerizing]
			172	0.03913	0.5121	fp2129	N/A	-5.59	0.54688	7 -- 36	28 -- 54	Protein of unknown function precursor
			97	0.02249	0.5121	fp2441	N/A	-5.42	0.580319	7 -- 31	17 -- 39	Probable lipoprotein precursor
			136	0.03217	0.5121	fp1985	groL	-5.38	0.587681	187 -- 228	16 -- 52	60 kDa chaperonin GroEL
			18	0.003959	0.4428	fp1324	rplF	-5.26	0.612798	151 -- 167	49 -- 64	50S ribosomal protein L6
			57	0.01343	0.5048	fp1269	rfbB	-5.21	0.622436	175 -- 233	17 -- 69	Probable ABC-type polysaccharide/polyol phosphate transport system ATPase component
			158	0.03697	0.5121	fp2430	N/A	-4.64	0.740032	72 -- 85	21 -- 34	Protein of unknown function precursor. Putative peptidyl-prolyl cis-trans isomerase precursor
			186	0.04165	0.5121	fp0369	N/A	-4.4	0.785255	186 -- 208	13 -- 34	Probable transmembrane protein of unknown function. Putative amino-acid efflux protein
			155	0.03646	0.5121	fp0324	N/A	-3.52	0.922512	64 -- 71	38 -- 45	Probable outer membrane lipoprotein precursor
